# Supplementary material for: Genetic Architecture of Intrinsic Antibiotic Susceptibility
Source: PLoS One. 2009 May 20;4(5):e5629. doi: 10.1371/journal.pone.0005629 (PMC2680486; doi:10.1371/journal.pone.0005629)
Supplement: Dataset S1 — Z-scores for loci with a significant effect on antibiotic susceptibility. (0.90 MB XLS) [file pone.0005629.s020.xls]

## Sheet: S1- Scores of Sig
Dataset S1: Z-scores for loci with a significant effect on antibiotic susceptibility.
Non-zero numbers indicate that strains with disruptions in or near the locus had significant change in their abundance during the enrichments.
The numbers shown are z-scores - see Methods.
Z-scores that did not meet the significance thresholds (2.15 for antibiotics hybridized twice and 1.5 for antibiotics hybridized three times) have been replaced with
zero.
ND: No data (a minimum of two repetitions were not available).
UNIQID	NAME	amk	gen	str	tob	lom	nal	slf	dox	tet	blm	fox	ery	nit	amp	pip	trm	fus
b0002	thrA aspartate kinase / homoserine dehydrogenase	0	0	0	0	0	0	0	0	0	0	0	0	0	0	0	0	0
b0003	thrB homoserine kinase	0	0	0	0	0	0	0	0	0	0	0	0	0	0	0	0	0
b0004	thrC threonine synthase	0	0	0	0	0	0	0	0	0	0	0	0	0	0	0	0	0
b0005	yaaX predicted protein	0	0	0	0	0	0	0	0	0	0	0	0	0	0	0	0	0
b0006	yaaA conserved protein	0	0	0	0	0	0	0	0	0	0	0	0	0	0	0	0	0
b0007	yaaJ YaaJ alanine AGSS transporter	0	0	0	0	0	0	0	0	0	0	0	0	0	0	0	0	0
b0008	talB transaldolase B	0	0	0	3.48109	0	0	0	0	0	0	0	0	0	0	0	0	0
b0009	mog predicted molybdochelatase	0	0	0	0	0	0	0	0	0	0	0	0	0	0	0	0	0
b0010	yaaH conserved inner membrane protein associated with acetate transport	0	0	0	0	0	0	0	0	0	0	0	0	0	0	0	0	0
b0011	yaaW conserved protein	0	ND	0	0	0	0	0	0	0	0	0	0	0	0	0	0	0
b0012	htgA predicted DNA-binding transcriptional regulator	0	0	0	0	0	0	0	0	0	0	0	0	0	0	0	0	0
b0013	yaaI predicted protein	0	0	0	0	0	0	0	0	0	0	0	0	0	0	0	0	0
b0014	dnaK chaperone Hsp70; DNA biosynthesis; autoregulated heat shock proteins	4.47711	6.80068	0	3.70832	0	0	0	0	0	0	0	0	0	0	0	0	0
b0015	dnaJ chaperone with DnaK; heat shock protein	2.6057	3.14678	0	0	0	5.22162	0	0	0	0	4.24418	0	0	0	3.39522	0	0
b0016	insL-1 IS186/IS421 transposase	0	0	0	0	0	0	0	0	0	0	0	0	0	0	0	0	0
b0017	yi82_1	0	0	0	0	0	0	0	0	0	0	0	0	0	0	0	0	0
b0018	mokC regulatory peptide whose translation enables hokC (gef) expression	ND	ND	ND	0	0	ND	0	0	0	0	0	0	0	0	0	0	0
b0019	nhaA NhaA sodium/proton transporter	0	0	0	0	0	0	0	0	0	0	0	0	0	0	0	0	0
b0020	nhaR NhaR transcriptional activator	0	0	0	0	0	0	0	0	0	0	0	0	0	0	0	0	0
b0021	insB-1 IS1 protein InsB	0	0	0	0	0	0	0	0	0	0	0	0	0	0	0	0	0
b0022	insA-1 IS1 protein InsA	0	0	ND	0	0	0	0	0	0	0	0	0	0	0	0	0	0
b0023	rpsT 30S ribosomal subunit protein S20	ND	0	0	0	0	0	0	0	0	0	0	0	0	0	0	0	0
b0025	ribF bifunctional riboflavin kinase / FMN adenylyltransferase	0	0	0	0	0	0	0	0	0	0	0	0	0	0	0	0	0
b0026	ileS isoleucyl-tRNA synthetase	0	0	0	0	0	0	0	0	0	0	0	0	0	0	0	0	0
b0027	lspA prolipoprotein signal peptidase II	0	0	0	0	0	0	0	0	0	0	0	0	0	0	0	0	0
b0028	fkpB peptidylprolyl isomerase	0	0	0	0	0	0	0	0	0	0	0	0	0	0	0	0	0
b0029	ispH 1-hydroxy-2-methyl-2-(E)-butenyl 4-diphosphate reductase	0	0	0	0	0	0	0	0	0	0	0	0	0	0	0	0	0
b0030	rihC ribonucleoside hydrolase 3	0	0	0	0	0	0	0	0	0	0	0	0	0	0	0	0	0
b0031	dapB dihydrodipicolinate reductase	0	0	0	0	0	0	0	0	0	0	0	0	0	0	0	0	0
b0032	carA carbamoyl phosphate synthetase	0	0	0	0	0	0	0	0	0	0	0	0	0	0	0	0	0
b0033	carB carbamoyl phosphate synthetase	0	0	0	ND	0	0	0	0	0	0	0	0	0	0	0	0	0
b0034	caiF CaiF transcriptional activator	0	0	0	0	0	0	0	0	0	0	0	0	0	0	0	0	0
b0035	caiE caiE protein	0	0	0	0	0	0	0	0	0	0	0	0	0	0	0	0	0
b0036	caiD crotonobetainyl-CoA hydratase / carnitine racemase	0	0	0	0	0	0	0	0	0	0	0	0	0	0	0	0	0
b0038	caiB CaiB monomer	0	0	0	0	0	0	0	0	0	0	0	0	0	0	0	0	0
b0039	caiA crotonobetaine reductase	0	0	0	0	0	0	0	0	0	0	0	0	0	0	0	0	0
b0040	caiT CaiT carnitine BCCT transporter	0	0	0	0	0	0	0	0	0	0	0	0	0	0	0	0	0
b0041	fixA probable flavoprotein subunit required for anaerobic carnitine metabolism	0	0	-3.89976	0	0	0	0	0	0	0	0	0	0	0	0	0	0
b0042	fixB probable flavoprotein subunit required for anaerobic carnitine metabolism	0	0	0	0	0	0	0	0	0	0	0	0	0	0	0	0	0
b0043	fixC flavoprotein (electron transport), possibly involved in anaerobic carnitine metabolism	0	0	0	0	0	0	0	0	0	0	0	0	0	0	0	0	0
b0044	fixX putative ferredoxin possibly involved in anaerobic carnitine metabolism	0	0	0	0	0	0	0	0	0	0	0	0	0	0	0	0	0
b0045	yaaU YaaU	0	0	0	0	0	0	0	0	0	0	0	0	0	0	0	0	0
b0047	kefC KefC potassium CPA2 transporter	0	0	0	0	0	0	0	0	0	0	0	0	0	0	0	0	0
b0048	folA dihydrofolate reductase	0	0	0	0	0	0	0	0	0	0	0	0	0	0	0	0	0
b0049	apaH diadenosine tetraphosphatase	0	0	0	0	0	0	0	0	2.38734	0	0	0	0	0	0	0	0
b0050	apaG hypothetical protein	0	0	0	0	0	0	0	0	0	0	0	0	0	0	0	0	0
b0051	ksgA S-adenosylmethionine-6-N',N'-adenosyl (rRNA) dimethyltransferase	0	0	0	0	0	0	0	0	0	0	0	0	0	0	0	0	0
b0052	pdxA 4-hydroxy-L-threonine phosphate dehydrogenase, NAD-dependent	0	0	0	0	0	0	0	0	0	0	0	0	0	0	0	0	0
b0053	surA peptidyl-prolyl cis-trans isomerase (PPIase)	0	0	0	0	0	0	0	0	0	0	0	0	0	0	0	0	0
b0054	imp exported protein required for envelope biosynthesis and integrity	0	0	0	0	0	0	0	0	0	0	0	0	0	0	0	0	0
b0055	djlA chaperone with DnaK	0	0	0	0	0	0	0	0	0	0	0	0	0	0	0	0	0
b0056	yabP predicted protein	0	0	0	0	0	0	0	0	0	0	0	0	0	0	0	0	0
b0057	yabQ predicted protein	0	0	ND	0	0	0	0	0	0	0	0	ND	0	0	0	0	0
b0058	rluA 23S rRNA and tRNA pseudouridine synthase	0	0	0	0	0	0	0	0	0	0	0	0	0	0	0	0	0
b0059	hepA RNA Polymerase (RNAP)-binding ATPase and RNAP recycling factor	0	0	0	0	0	0	0	0	0	0	0	0	0	0	0	0	0
b0060	polB DNA polymerase II	0	0	0	0	0	0	0	0	0	0	0	0	0	0	0	0	0
b0061	araD L-ribulose-phosphate 4-epimerase monomer	0	0	ND	0	0	0	0	0	0	0	0	0	0	0	0	0	0
b0063	araB L-ribulokinase monomer	0	0	0	0	0	0	0	0	0	0	0	0	0	0	0	0	0
b0064	araC AraC-Arabinose transcriptional activator	ND	0	0	0	0	0	0	0	0	0	0	0	0	0	0	0	0
b0065	yabI conserved inner membrane protein	0	0	0	0	0	0	0	0	0	0	0	0	0	0	0	0	0
b0066	thiQ SfuC	0	0	0	0	0	0	0	0	0	0	0	0	0	0	0	0	0
b0067	thiP SfuB	0	0	0	0	0	0	0	0	0	0	0	0	0	0	0	0	0
b0068	tbpA SfuA	0	0	0	0	0	0	0	0	0	0	0	0	0	0	0	0	0
b0069	sgrR SgrR transcriptional dual regulator	0	0	0	0	0	0	0	0	0	0	0	0	0	0	0	0	0
b0070	setA YabM MFS transporter	0	0	0	0	0	0	0	0	0	0	0	0	0	0	0	0	0
b0071	leuD isopropylmalate isomerase	0	0	0	0	0	0	0	0	0	0	0	0	0	0	0	0	0
b0072	leuC isopropylmalate isomerase	0	0	0	0	0	0	0	0	0	ND	0	0	0	0	0	0	0
b0073	leuB 3-isopropylmalate dehydrogenase	0	0	0	0	0	0	0	0	0	0	0	0	0	0	0	0	0
b0075	leuL leu operon leader peptide	0	ND	0	0	0	0	0	0	0	0	ND	0	ND	0	ND	0	ND
b0076	leuO LeuO transcriptional activator	0	0	0	0	0	0	0	0	0	0	0	0	0	0	0	0	0
b0077	ilvI acetolactate synthase / acetohydroxybutanoate synthase	0	0	0	0	0	0	0	0	0	0	0	0	0	0	0	0	0
b0078	ilvH acetolactate synthase / acetohydroxybutanoate synthase	ND	ND	ND	0	0	0	0	0	0	0	0	0	0	0	0	0	0
b0080	fruR FruR transcriptional dual regulator	-2.16683	0	0	0	0	0	0	0	0	0	0	0	0	0	0	0	0
b0081	mraZ conserved protein	0	0	0	0	0	0	0	0	0	0	0	0	0	0	0	0	0
b0082	mraW S-adenosyl-dependent methyltransferase	0	0	0	0	0	0	0	0	0	0	0	0	0	0	0	0	0
b0083	ftsL essential cell division protein FtsL	0	0	0	0	0	0	0	0	0	0	0	0	0	0	0	0	0
b0084	ftsI essential cell division protein FtsI; penicillin-binding protein 3	0	0	0	0	0	0	0	0	0	0	0	0	0	0	0	0	0
b0085	murE UDP-N-acetylmuramoylalanyl-D-glutamate 2,6-diaminopimelate ligase	0	0	0	0	0	0	0	0	0	0	0	0	0	0	0	0	0
b0086	murF D-alanyl-D-alanine-adding enzyme	0	0	0	0	0	0	0	0	0	0	0	0	0	0	0	0	0
b0088	murD UDP-N-acetylmuramoyl-L-alanine:D-glutamate ligase	0	0	0	0	0	0	0	0	0	0	0	0	0	0	0	0	0
b0089	ftsW essential cell division protein FtsW	0	0	0	0	0	0	0	0	0	0	0	0	0	0	0	0	0
b0090	murG N-acetylglucosaminyl transferase	0	0	0	0	0	0	0	0	0	0	0	0	0	0	0	0	0
b0091	murC UDP-N-acetylmuramate-alanine ligase	0	0	0	0	0	0	0	0	0	0	0	0	0	0	0	0	0
b0092	ddlB D-alanine-D-alanine ligase B	0	0	0	0	0	0	0	0	0	0	0	0	0	0	0	0	0
b0093	ftsQ essential cell division protein FtsQ	0	0	0	0	0	0	0	0	0	0	0	0	0	0	0	0	0
b0094	ftsA essential cell division protein FtsA	0	0	0	0	0	0	0	0	0	0	0	0	0	0	0	0	0
b0095	ftsZ essential cell division protein FtsZ	0	0	0	0	0	0	0	0	0	0	0	0	0	0	0	0	0
b0096	lpxC UDP-3-O-acyl-N-acetylglucosamine deacetylase	0	0	0	0	0	0	0	0	0	0	0	0	0	0	0	0	0
b0097	secM secretion monitor that regulates SecA translation (General Secretory Pathway)	0	0	0	0	0	0	0	0	0	0	0	0	0	0	0	0	0
b0098	secA Sec Protein Secretion Complex	0	0	0	0	0	0	0	0	0	0	0	0	0	0	0	0	0
b0099	mutT dGTP pyrophosphohydrolase	0	0	2.86727	0	0	-2.76314	0	0	0	0	0	0	0	0	0	0	0
b0101	yacG conserved hypothetical protein with a zinc finger	ND	0	0	0	0	0	0	0	0	0	0	0	0	0	0	0	0
b0102	yacF conserved protein	0	0	0	0	0	0	0	0	0	0	0	0	0	0	0	0	0
b0103	coaE dephospho-CoA kinase	0	0	0	0	0	0	0	0	0	0	0	0	0	0	0	0	0
b0104	guaC GMP reductase	0	0	0	0	0	0	0	0	0	0	0	0	0	0	0	0	0
b0105	b0105	ND	ND	0	0	0	0	0	0	0	0	0	0	ND	0	0	0	0
b0106	hofC protein transport protein HofC	0	0	0	0	0	0	0	0	0	0	0	0	0	0	0	0	0
b0107	hofB protein involved in plasmid replication	0	0	0	0	0	0	0	0	0	0	0	0	0	0	0	0	0
b0108	ppdD prepilin peptidase dependent protein	0	0	0	0	0	0	0	0	0	0	0	0	0	0	0	0	0
b0109	nadC quinolinate phosphoribosyltransferase (decarboxylating) monomer	0	2.43573	0	2.98673	0	0	0	0	0	0	0	0	0	0	0	0	0
b0110	ampD N-acetyl-anhydromuramyl-L-alanine-amidase	0	0	0	0	0	0	0	0	0	0	0	0	0	0	0	0	0
b0111	ampE predicted inner membrane protein	0	0	0	0	0	-2.6041	0	0	0	0	0	0	0	0	0	0	0
b0112	aroP AroP phenylalanine/tyrosine/tryptophan APC transporter	0	0	0	0	0	0	0	0	0	0	0	0	0	0	0	0	0
b0113	pdhR PdhR transcriptional dual regulator	2.52789	2.20325	3.37212	2.4882	0	0	0	0	0	0	0	0	0	0	0	0	0
b0114	aceE subunit of E1p component of pyruvate dehydrogenase complex	14.4363	8.73485	15.332	10.3276	0	0	0	0	0	2.17646	0	0	0	0	0	0	0
b0115	aceF AceF-lipoate	13.1938	6.5361	14.2417	8.29772	0	0	0	0	0	0	0	0	0	0	0	0	0
b0117	yacH putative membrane protein	0	0	0	0	0	0	0	0	0	0	0	0	0	0	0	0	0
b0118	acnB aconitase B	3.36724	3.96146	3.57052	3.06054	0	0	0	0	0	0	0	0	0	0	0	0	0
b0119	yacL conserved protein	0	0	0	0	0	0	0	0	0	0	0	0	0	0	0	0	0
b0120	speD adenosylmethionine decarboxylase, proenzyme	0	0	0	0	0	0	0	0	0	0	0	0	0	0	0	0	0
b0121	speE spermidine synthase	2.41294	0	0	0	0	0	0	0	0	0	0	0	0	0	0	0	0
b0122	yacC predicted protein	0	0	0	0	0	0	0	0	0	0	0	0	0	0	0	0	0
b0123	cueO multicopper oxidase with role in copper homeostasis	0	0	0	0	0	0	0	0	0	0	0	0	0	0	0	0	0
b0124	gcd glucose dehydrogenase	0	0	0	0	0	0	0	0	0	0	0	0	ND	0	0	0	0
b0127	yadG YadG/YadH ABC transporter	0	0	0	0	0	0	0	0	0	0	0	0	0	0	0	0	0
b0128	yadH YadG/YadH ABC transporter	0	0	0	0	0	0	0	0	0	0	0	0	0	0	0	0	0
b0130	yadE predicted polysaccharide deacetylase lipoprotein	0	0	0	0	0	0	0	0	0	0	0	0	0	0	0	0	0
b0132	yadD predicted transposase	0	0	0	0	0	0	0	0	0	0	0	0	0	0	0	0	0
b0134	panB 3-methyl-2-oxobutanoate hydroxymethyltransferase monomer	0	0	0	0	0	0	0	0	0	0	0	0	0	0	0	0	0
b0135	yadC predicted fimbrial-like adhesin protein	0	0	0	0	0	0	0	0	0	0	0	0	0	0	0	0	0
b0136	yadK predicted fimbrial-like adhesin protein	ND	0	ND	-3.21895	0	0	0	0	0	0	0	0	0	0	0	0	0
b0138	yadM predicted fimbrial-like adhesin protein	ND	ND	ND	ND	0	0	0	0	0	0	0	0	0	0	0	0	0
b0139	htrE putative outer membrane porin protein involved in fimbrial assembly	0	0	0	-2.78319	0	0	0	0	0	0	0	0	0	0	0	0	0
b0140	ecpD probable pilin chaperone similar to PapD	0	0	0	-4.83236	0	0	0	0	0	0	0	0	0	0	0	0	0
b0141	yadN predicted fimbrial-like adhesin protein	0	0	0	-2.39666	0	0	0	0	0	0	0	0	0	0	0	0	0
b0142	folK 6-hydroxymethyl-7,8-dihydropterin pyrophosphokinase	0	0	0	0	0	0	0	0	0	0	0	0	0	0	0	0	0
b0143	pcnB poly(A) polymerase I	0	0	0	0	0	0	0	0	0	0	0	0	0	0	0	0	0
b0144	yadB glutamyl-Q tRNA(Asp) synthetase	0	0	0	0	0	0	0	0	0	0	0	0	0	0	0	0	0
b0145	dksA RNA polymerase-binding transcription factor	0	0	0	0	0	0	0	0	0	0	0	0	0	0	0	0	0
b0146	sfsA predicted DNA-binding transcriptional regulator of maltose metabolism	0	ND	ND	0	0	0	0	0	0	0	0	0	0	0	0	0	0
b0147	ligT 2'-5' RNA ligase	0	0	0	0	0	0	0	0	0	0	0	0	0	0	0	0	0
b0149	mrcB murein synthesizing holoenzyme	0	0	0	0	0	0	0	0	0	0	0	0	0	0	0	0	0
b0150	fhuA FhuA outer membrane protein receptor for ferrichrome, colicin M, and phages T1, T5, and phi80	0	0	0	0	0	0	0	0	0	0	0	0	0	0	0	0	0
b0151	fhuC ferrichrome uptake system	0	0	0	0	0	0	0	0	0	0	0	0	0	0	0	0	0
b0152	fhuD ferrichrome uptake system	0	0	0	0	0	0	0	0	0	0	0	0	0	0	0	0	0
b0153	fhuB ferrichrome uptake system	0	0	0	0	0	0	0	0	0	0	0	0	0	0	0	0	0
b0154	hemL glutamate-1-semialdehyde aminotransferase	0	0	0	0	0	0	0	0	0	0	0	0	0	0	0	0	0
b0155	clcA EriC chloride ion ClC channel	0	0	0	0	0	0	0	0	0	0	0	0	0	0	0	0	0
b0156	erpA essential respiratory protein A	0	0	0	0	0	0	0	0	0	0	0	0	0	0	0	0	0
b0157	yadS conserved inner membrane protein	0	0	0	0	0	0	0	0	0	0	0	0	0	0	0	0	0
b0158	btuF periplasmic vitamin B12 binding protein	0	0	0	0	0	0	0	0	0	0	0	0	0	0	0	0	0
b0159	mtn 5'-methylthioadenosine/S-adenosylhomocysteine nucleosidase monomer	0	0	0	0	0	0	0	0	0	0	0	0	0	0	0	0	0
b0160	dgt deoxyguanosinetriphosphate triphosphohydrolase	0	0	0	0	0	0	0	0	0	0	0	0	0	0	0	0	0
b0161	degP serine protease Do	0	0	0	0	0	0	0	0	0	0	0	0	0	0	0	0	0
b0162	cdaR CdaR transcriptional activator	0	0	0	0	0	0	0	0	0	0	0	0	0	0	0	0	0
b0163	yaeH conserved protein	ND	ND	ND	ND	0	0	0	0	0	0	0	0	0	0	0	0	0
b0164	yaeI phosphodiesterase	0	0	0	0	0	0	0	0	0	0	0	0	0	0	0	0	0
b0165	b0165	0	0	ND	0	0	0	0	0	0	0	0	0	0	0	0	0	0
b0166	dapD tetrahydrodipicolinate succinylase subunit	0	0	0	0	0	0	0	0	0	0	0	0	0	0	0	0	0
b0167	glnD uridylyltransferase / uridylyl-removing enzyme	0	0	0	0	0	0	0	0	0	0	0	0	0	0	0	0	0
b0168	map methionine aminopeptidase	0	0	0	0	0	0	0	0	0	0	0	0	0	0	0	0	0
b0169	rpsB 30S ribosomal subunit protein S2	0	0	0	0	0	0	0	0	0	0	0	0	0	0	0	0	0
b0170	tsf protein chain elongation factor EF-Ts	0	0	0	0	0	0	0	0	0	0	0	0	0	0	0	0	0
b0171	pyrH uridylate kinase	0	2.15254	0	2.26204	0	0	0	0	0	0	0	0	0	0	0	0	0
b0172	frr ribosome recycling factor	0	0	3.01639	2.96227	0	0	0	0	0	0	0	0	0	0	0	0	0
b0173	dxr 1-deoxy-D-xylulose 5-phosphate reductoisomerase	0	3.03168	0	0	0	0	0	0	0	0	0	0	0	0	0	0	0
b0174	ispU subunit of undecaprenyl diphosphate synthase	0	0	0	0	0	0	0	0	0	0	0	0	0	0	0	0	0
b0175	cdsA CDP-diglyceride synthetase	0	0	0	0	0	0	0	0	0	0	0	0	0	0	0	0	0
b0176	rseP RseP zinc protease	0	0	0	0	0	0	0	0	0	0	0	0	0	0	0	0	0
b0177	yaeT Outer Membrane Protein Assembly Complex	0	0	0	0	0	0	0	0	0	0	0	0	0	0	0	0	0
b0178	hlpA periplasmic chaperone	0	0	0	0	0	0	0	0	0	0	0	0	0	0	0	0	0
b0179	lpxD UDP-3-O-[3-hydroxymyristoyl]glucosamine N-acetyltransferase	0	0	0	0	0	0	0	0	0	0	0	0	0	0	0	0	0
b0180	fabZ beta;-hydroxyacyl-ACP dehydratase	0	0	0	0	0	0	0	0	0	0	0	0	0	0	0	0	0
b0181	lpxA UDP-N-acetylglucosamine acyltransferase	0	0	ND	0	0	0	0	0	0	0	0	0	0	0	0	0	0
b0182	lpxB lipid A disaccharide synthase	0	0	0	0	0	0	0	0	0	0	0	0	0	0	0	0	0
b0183	rnhB RNAse HII, degrades RNA of DNA-RNA hybrids	0	0	0	0	0	0	0	0	0	0	0	0	0	0	0	0	0
b0185	accA acetyl CoA carboxylase	0	0	0	0	0	0	0	0	0	0	0	0	0	0	0	0	0
b0186	ldcC lysine decarboxylase 2	0	0	0	0	0	0	0	0	0	0	0	0	0	0	0	0	0
b0187	yaeR predicted lyase	0	0	0	0	0	0	0	0	0	0	0	0	0	0	0	0	0
b0188	tilS tRNA Ile-lysidine synthetase	0	0	0	0	0	0	0	0	0	0	0	0	0	0	0	0	0
b0189	rof Rho-binding antiterminator	0	0	0	0	0	0	0	0	0	0	0	0	0	0	0	0	0
b0190	yaeQ conserved protein	0	0	0	0	0	0	0	0	0	0	0	0	0	0	0	0	0
b0191	yaeJ conserved protein	0	0	0	0	0	0	0	0	0	0	0	0	0	0	0	0	0
b0192	nlpE outer membrane lipoprotein NlpE, involved in surface sensing	0	0	0	0	0	0	0	0	0	0	0	0	0	0	0	0	0
b0193	yaeF predicted lipoprotein	0	0	0	0	0	0	0	0	0	0	0	0	0	0	0	0	0
b0194	proS prolyl-tRNA synthetase	0	0	0	0	0	0	0	0	0	0	0	0	0	0	0	0	0
b0195	yaeB conserved protein	0	0	0	0	0	0	0	0	0	0	0	0	0	0	0	0	0
b0196	rcsF RcsF-P	0	0	0	0	-3.18098	0	0	0	0	0	0	0	0	-1.61982	0	0	0
b0197	metQ L- and D-methionine uptake ABC permease	0	0	0	0	0	0	0	0	0	0	0	0	0	0	0	0	0
b0198	metI L- and D-methionine uptake ABC permease	0	0	0	0	0	0	0	0	0	0	0	0	0	0	0	0	0
b0199	metN L- and D-methionine uptake ABC permease	0	0	0	0	0	0	0	0	0	0	0	0	0	0	0	0	0
b0200	gmhB D,D-heptose 1,7-bisphosphate phosphatase	0	0	0	0	0	0	0	0	0	0	0	0	0	0	0	0	0
b0207	dkgB 4-nitrobenzaldehyde reductase [multifunctional]	0	0	0	0	0	0	0	0	0	0	0	0	0	0	0	0	0
b0208	yafC predicted DNA-binding transcriptional regulator LYSR-type	ND	0	ND	0	0	0	0	0	0	0	0	0	0	0	0	0	0
b0209	yafD conserved protein	0	0	0	0	-1.87442	0	0	0	0	0	0	0	0	0	0	2.63498	0
b0212	gloB glyoxalase II	0	0	0	0	0	0	0	0	0	0	0	0	0	0	0	0	0
b0214	rnhA RNase HI, degrades RNA of DNA-RNA hybrids, participates in DNA replication	0	0	0	0	0	0	0	0	0	0	0	0	0	0	0	0	0
b0215	dnaQ DNA polymerase III, epsilon; subunit	0	0	0	0	0	0	0	0	0	0	0	0	0	0	0	0	0
b0217	yafT predicted aminopeptidase	0	0	0	0	0	0	0	0	0	0	0	0	0	0	0	0	0
b0218	yafU predicted inner membrane protein	0	0	0	0	0	0	0	0	0	0	0	0	0	0	0	0	0
b0219	yafV predicted C-N hydrolase family amidase, NAD(P)-binding	0	0	0	0	0	0	0	0	0	0	0	0	0	0	0	0	0
b0220	ivy inhibitor of vertebrate C-type lysozyme	0	0	0	0	0	0	0	0	0	0	0	0	0	0	0	0	0
b0221	fadE acyl-CoA dehydrogenase	0	0	0	0	0	0	0	0	0	0	0	0	0	0	0	0	0
b0222	lpcA D-sedoheptulose 7-phosphate isomerase	0	0	0	0	0	0	0	0	0	0	0	0	0	0	0	0	0
b0224	yafK conserved protein	0	0	0	0	0	0	0	0	0	0	0	0	0	0	0	0	0
b0225	yafQ toxin of the YafQ-DinJ toxin-antitoxin system	0	ND	ND	0	0	0	0	0	0	0	0	0	0	0	0	0	0
b0226	dinJ antitoxin of YafQ-DinJ toxin-antitoxin system	0	0	0	0	0	0	0	0	0	0	0	0	0	0	0	0	0
b0227	yafL predicted lipoprotein and C40 family peptidase	0	0	0	0	0	0	0	0	0	0	0	0	0	0	0	0	0
b0228	yafM conserved protein	-2.19198	0	0	0	0	0	0	0	0	0	0	0	0	0	0	0	0
b0229	fhiA	0	0	0	0	0	0	0	0	0	0	0	0	0	0	0	0	0
b0230	mbhA	0	0	0	0	0	0	0	0	0	0	0	0	0	0	0	0	0
b0231	dinB DNA polymerase IV (Y-family DNA polymerase; translesion DNA synthesis)	0	0	0	0	0	0	0	0	0	0	0	0	0	0	0	0	0
b0232	yafN conserved hypothetical protein with a possible role in spontaneous mutagenesis	0	0	0	0	0	0	0	0	0	0	0	0	0	0	0	0	0
b0233	yafO conserved protein with a possible role in spontaneous mutagenesis; toxin of a putative toxin-antitoxin pair	0	0	0	0	0	0	0	0	0	0	0	0	0	0	0	0	0
b0234	yafP predicted acyltransferase with acyl-CoA N-acyltransferase domain	0	0	0	0	0	0	0	0	0	0	0	0	0	0	0	0	0
b0235	ykfJ	0	-2.22563	0	-5.78261	0	0	0	0	0	0	0	0	0	0	0	0	0
b0236	prfH	ND	ND	ND	0	0	ND	0	0	0	ND	0	0	0	ND	0	0	ND
b0238	gpt xanthine phosphoribosyltransferase [multifunctional]	0	0	0	0	0	0	0	0	0	0	0	0	0	0	0	0	0
b0239	frsA fermentation/respiration switch protein	0	0	0	0	0	0	0	0	0	0	0	0	0	0	0	0	0
b0240	crl Crl transcriptional regulator	0	0	0	0	0	-2.31627	0	0	0	0	0	0	0	0	0	0	0
b0241	phoE outer membrane pore protein E	0	0	0	-3.47126	0	0	0	0	0	0	0	0	0	0	0	0	0
b0242	proB gamma;-glutamyl kinase-GP-reductase multienzyme complex	0	0	0	0	0	0	0	0	0	0	0	0	0	0	0	0	0
b0243	proA gamma;-glutamyl kinase-GP-reductase multienzyme complex	0	0	0	0	-1.95775	0	0	0	0	0	0	0	0	0	0	0	0
b0245	ykfI toxin of the YkfI-YafW toxin-antitoxin pair	0	0	ND	0	0	0	0	0	0	0	0	0	0	0	0	0	0
b0246	yafW antitoxin of the YkfI-YafW toxin-antitoxin pair	0	0	0	0	0	0	0	0	0	0	0	0	0	0	0	0	0
b0247	ykfG CP4-6 prophage; predicted DNA repair protein	0	0	0	0	0	0	0	0	0	0	0	0	0	0	0	0	0
b0248	yafX CP4-6 prophage; predicted protein	0	0	0	0	0	0	0	0	0	0	0	0	0	0	0	0	0
b0249	ykfF CP4-6 prophage; predicted protein	0	0	0	0	0	0	0	0	0	0	0	0	0	0	0	0	0
b0250	ykfB CP4-6 prophage; predicted protein	0	0	0	0	0	0	0	0	0	0	0	0	0	0	0	0	0
b0251	yafY CP4-6 prophage; inner membrane lipoprotein	0	0	0	0	0	0	0	0	0	0	0	0	0	0	0	0	0
b0252	yafZ CP4-6 prophage; conserved protein	0	0	0	0	0	0	0	0	0	0	0	0	0	0	0	0	0
b0253	ykfA CP4-6 prophage; predicted GTP-binding protein	0	0	0	0	0	0	0	0	0	0	0	0	0	0	0	0	0
b0254	perR PerR transcriptional regulator	0	ND	ND	0	0	0	0	0	0	0	0	0	0	0	0	0	0
b0255	insN-1 CP4-6 prophage; partial regulator of insertion element IS911A	0	0	0	0	0	0	0	0	0	0	0	0	0	0	0	0	0
b0256	insI-1 transposase of IS30	0	0	0	0	0	0	0	0	0	0	0	0	0	0	0	0	0
b0257	insO-1 CP4-6 prophage; partial transposase of insertion element IS911A, interrupted by insertion of IS30 element	0	ND	0	ND	0	0	0	0	0	0	0	ND	0	0	0	0	ND
b0258	ykfC CP4-6 prophage; conserved protein	0	0	0	0	0	0	0	0	0	0	0	0	0	0	0	0	0
b0259	insH-1 IS5 transposase and trans-activator	0	0	0	-2.78093	0	0	0	0	0	0	0	0	0	0	0	0	0
b0260	mmuP MmuP APC transporter	0	0	0	0	0	0	0	0	0	0	0	0	0	0	0	0	0
b0261	mmuM homocysteine methyltransferase	0	0	0	0	0	0	0	0	0	0	0	0	0	0	0	0	0
b0262	afuC CP4-6 prophage; predicted ferric transporter subunit/ATP-binding component of ABC superfamily	0	0	0	0	0	0	0	0	0	0	0	0	0	0	0	0	0
b0263	afuB AfuB	0	0	0	0	0	0	0	0	0	0	0	0	0	0	0	0	0
b0264	insB-2 IS1 protein InsB	0	0	0	0	0	0	0	0	0	0	0	0	0	0	0	0	0
b0265	insA-2 IS1 protein InsA	ND	ND	ND	0	0	0	0	0	0	0	0	0	0	0	0	0	0
b0266	yagB CP4-6 prophage; conserved protein	0	0	0	0	0	0	0	0	0	0	0	0	0	0	0	0	0
b0267	yagA CP4-6 prophage; predicted DNA-binding transcriptional regulator	0	0	0	0	0	0	0	0	0	0	0	0	0	0	0	0	0
b0268	yagE CP4-6 prophage; predicted lyase/synthase	0	0	0	0	0	0	0	0	0	0	0	0	0	0	0	0	0
b0273	argF ornithine carbamoyltransferase	0	0	0	0	0	0	0	0	0	0	0	0	0	0	0	0	0
b0274	insB-3 IS1 protein InsB	0	0	0	0	0	0	0	0	0	0	0	0	0	0	0	0	0
b0275	insA-3 IS1 protein InsA	ND	ND	ND	ND	0	0	0	0	0	0	0	0	0	0	0	0	0
b0276	yagJ CP4-6 prophage; predicted protein	0	0	0	0	0	0	0	0	0	0	0	0	0	0	0	0	0
b0277	yagK CP4-6 prophage; conserved protein	0	0	0	-3.57518	0	0	0	0	0	0	0	0	0	0	0	0	0
b0278	yagL CP4-6 prophage; DNA-binding protein	ND	ND	ND	0	0	0	0	0	0	0	0	0	0	0	0	0	0
b0279	yagM CP4-6 prophage; predicted protein	0	0	0	0	0	0	0	0	0	0	0	0	0	0	0	0	0
b0280	yagN CP4-6 prophage; predicted protein	0	0	ND	0	0	0	0	0	0	0	0	0	0	0	0	0	0
b0281	intF CP4-6 prophage; predicted phage integrase	0	0	ND	0	0	0	0	0	0	0	0	0	0	0	0	0	0
b0282	yagP predicted transcriptional regulator LYSR-type	0	0	0	0	0	0	0	0	0	0	0	0	0	0	0	0	0
b0283	yagQ conserved protein	0	0	0	0	0	0	0	0	0	0	0	0	0	0	0	0	0
b0284	yagR putative molybdenum cofactor-binding oxidoreductase	0	0	0	0	0	0	0	0	0	0	0	0	0	0	0	0	0
b0285	yagS putative oxidoreductase, FAD-binding domain	0	0	0	0	0	0	0	0	0	0	0	0	0	0	0	0	0
b0286	yagT putative oxidoreductase, Fe-S subunit	0	0	0	0	0	0	0	0	0	0	0	0	0	0	0	0	0
b0287	yagU conserved inner membrane protein	0	0	0	0	0	0	0	0	0	0	0	0	0	0	0	0	0
b0288	ykgJ predicted ferredoxin	0	0	0	0	0	0	0	0	0	0	0	0	0	0	0	0	0
b0289	yagV conserved protein	0	0	0	0	0	0	0	0	0	0	0	0	0	0	0	0	0
b0290	yagW predicted receptor	0	0	0	0	0	0	0	3.70023	2.74919	0	0	0	0	0	0	0	0
b0291	yagX predicted aromatic compound dioxygenase	0	0	0	0	0	0	0	0	0	0	0	0	0	0	0	0	0
b0292	matC predicted protein	0	0	0	0	0	0	0	0	0	0	0	0	0	0	0	0	0
b0293	matB conserved fimbrillin	0	0	0	-2.5799	0	0	0	0	0	0	0	0	0	0	0	0	0
b0294	matA predicted regulator	ND	ND	ND	-2.44293	0	0	0	0	0	0	0	0	0	0	0	0	0
b0295	ykgL predicted protein	-2.36921	-3.17811	0	-3.18065	0	0	0	0	0	0	0	0	0	0	0	0	0
b0296	ykgM predicted ribosomal protein	0	0	ND	0	0	0	0	0	0	0	0	0	0	0	0	0	0
b0297	eaeH	0	0	0	-3.10098	0	0	0	0	0	0	0	0	0	0	0	0	0
b0298	insE-1 IS3 element protein InsE	0	0	0	-2.57873	0	0	0	0	0	0	0	0	0	0	0	0	0
b0299	insF-1 IS3 element protein InsF	0	0	0	-3.38053	0	0	0	0	0	0	0	0	0	0	0	0	0
b0300	ykgA predicted DNA-binding transcriptional regulator	ND	0	ND	-2.44349	0	0	0	0	0	0	0	0	0	0	0	0	0
b0301	ykgB conserved inner membrane protein	0	0	0	-2.83901	0	0	0	0	0	0	0	0	0	0	0	0	0
b0302	b0302	0	0	ND	0	0	0	0	0	0	0	0	0	0	0	0	0	0
b0304	ykgC predicted oxidoreductase with FAD/NAD(P)-binding domain and dimerization domain	0	ND	ND	0	0	0	0	0	0	0	0	0	0	0	0	0	0
b0305	ykgD predicted DNA-binding transcriptional regulator	0	0	0	-3.63958	0	0	0	0	0	0	0	0	0	0	0	0	0
b0306	ykgE predicted oxidoreductase	0	0	0	-2.27768	0	0	0	0	0	0	0	0	0	0	0	0	0
b0307	ykgF predicted amino acid dehydrogenase with NAD(P)-binding domain and ferridoxin-like domain	0	0	0	0	0	0	0	0	0	0	0	0	0	0	0	0	0
b0308	ykgG predicted transporter	0	0	0	0	0	0	0	0	0	0	0	0	0	0	0	0	0
b0309	b0309	ND	0	ND	0	0	ND	0	0	0	0	0	0	0	0	0	0	ND
b0310	ykgH predicted inner membrane protein	0	0	0	0	0	0	0	0	0	0	0	0	0	0	0	0	0
b0311	betA choline dehydrogenase	0	0	0	0	0	0	0	0	0	0	0	0	0	0	0	0	0
b0312	betB betaine aldehyde dehydrogenase	0	0	0	0	0	0	0	0	0	0	0	0	0	0	0	0	0
b0313	betI BetI transcriptional repressor	0	0	0	0	0	0	0	0	0	0	0	0	0	0	0	0	0
b0314	betT BetT choline BCCT transporter	0	0	0	0	0	0	0	0	0	0	0	0	0	0	0	0	0
b0315	yahA phosphodiesterase, c-di-GMP-specific	0	0	0	0	0	0	0	0	0	0	0	0	0	0	0	0	0
b0316	yahB predicted DNA-binding transcriptional regulator LYSR-type	0	ND	0	ND	1.5248	0	0	0	0	0	0	ND	0	0	0	0	ND
b0317	yahC predicted inner membrane protein	0	0	0	-2.84725	0	0	0	0	0	0	0	0	0	0	0	0	0
b0318	yahD predicted transcriptional regulator with ankyrin domain	0	0	0	-3.73276	0	0	0	0	0	0	0	0	0	0	0	0	0
b0319	yahE predicted protein	0	0	0	-5.39381	0	0	0	0	0	0	0	0	0	0	0	0	0
b0320	yahF predicted acyl-CoA synthetase with NAD(P)-binding domain and succinyl-CoA synthetase domain	0	0	0	0	0	0	0	0	0	0	0	0	0	0	0	0	0
b0321	yahG conserved protein	2.97108	0	0	0	0	0	0	0	0	0	0	0	0	0	0	0	0
b0326	yahL predicted protein	0	0	0	-2.3132	0	0	0	0	0	0	0	0	0	0	0	0	0
b0327	yahM predicted protein	-2.56885	0	ND	-3.60561	0	0	-1.82899	0	0	0	0	0	0	0	0	0	0
b0328	yahN predicted neutral amino acid efflux system	0	0	0	-3.30887	0	0	0	0	0	0	0	0	0	0	0	0	0
b0329	yahO predicted protein	0	0	0	0	0	0	0	0	0	0	0	0	0	0	0	0	0
b0330	prpR PrpR transcriptional dual regulator	0	0	0	0	0	0	0	0	0	0	0	0	0	0	0	0	0
b0331	prpB 2-methylisocitrate lyase	0	0	0	0	0	0	0	0	0	0	0	0	0	0	0	0	0
b0333	prpC methylcitrate synthase	0	0	0	0	0	0	0	0	0	0	0	0	0	0	0	0	0
b0334	prpD 2-methylcitrate dehydratase	0	0	0	0	0	0	0	0	0	0	0	0	0	0	0	0	0
b0335	prpE putative propionyl-CoA synthetase	0	0	0	0	0	0	0	0	0	0	0	0	0	0	0	0	0
b0336	codB CodB cytosine NCS1 transporter	0	0	0	0	0	0	0	0	0	0	0	0	0	0	0	0	0
b0337	codA cytosine deaminase	0	0	0	0	0	0	0	0	0	0	0	0	0	0	0	0	0
b0338	cynR CynR transcriptional dual regulator	0	0	0	0	0	ND	0	0	0	0	0	0	ND	0	0	0	0
b0339	cynT carbonic anhydrase monomer	0	0	0	0	0	0	0	0	0	0	0	0	0	0	0	0	0
b0340	cynS cyanase monomer	0	0	0	0	0	0	0	0	0	0	0	0	0	0	0	0	0
b0341	cynX CynX cyanate MFS transporter	0	0	0	0	0	0	0	0	0	0	0	0	0	0	0	0	0
b0343	lacY LacY lactose MFS transporter	0	0	0	-2.56646	0	0	0	0	0	0	0	0	0	0	0	0	0
b0344	lacZ beta;-galactosidase monomer	0	ND	ND	ND	0	0	0	0	0	0	0	0	0	0	0	0	0
b0346	mhpR MhpR transcriptional activator	0	0	0	0	0	0	0	0	0	0	0	0	0	0	0	0	0
b0347	mhpA 3-(3-hydroxyphenyl)propionate 2-hydroxylase	0	0	0	0	0	0	0	0	0	0	0	0	0	0	0	0	0
b0348	mhpB 3-(2,3-dihydroxyphenyl)propionate dioxygenase	0	0	ND	0	0	0	0	0	0	0	0	0	0	0	0	0	0
b0350	mhpD 2-keto-4-pentenoate hydratase	0	0	0	0	0	0	0	0	0	0	0	0	0	0	0	0	0
b0351	mhpF acetaldehyde dehydrogenase 2	0	0	0	0	0	ND	0	0	0	0	0	0	ND	0	0	0	0
b0352	mhpE 4-hydroxy-2-ketovalerate aldolase	0	0	0	0	0	0	0	0	0	0	0	0	0	0	0	0	0
b0353	mhpT MhpT MFS transporter	0	0	0	0	0	0	0	0	0	0	0	0	0	0	0	0	0
b0354	yaiL nucleoprotein/polynucleotide-associated enzyme	0	0	0	0	0	0	0	0	0	0	0	0	0	0	0	0	0
b0355	frmB S-formylglutathione hydrolase	0	0	0	0	0	0	0	0	0	0	0	0	0	0	0	0	0
b0358	yaiO outer membrane protein	0	0	0	0	0	0	0	0	0	0	0	0	0	0	0	0	0
b0359	yaiX predicted acyl transferase (pseudogene)	0	0	0	0	0	0	0	0	0	0	0	0	0	0	0	0	0
b0360	insC-1 IS2 element protein InsA	0	0	0	-3.28363	0	0	0	0	0	0	0	0	0	0	0	0	0
b0361	insD-1 IS2 element protein	0	0	0	-3.94207	0	0	0	0	0	0	0	0	0	0	0	0	0
b0362	yaiF predicted protein	0	0	0	0	0	0	0	0	0	0	0	0	0	0	0	0	0
b0363	yaiP predicted glucosyltransferase	0	0	0	-3.1419	0	0	0	0	0	0	0	0	0	0	0	0	0
b0364	yaiS conserved protein	0	0	0	0	0	0	0	0	0	0	0	0	0	0	0	0	0
b0365	tauA taurine ABC transporter	0	0	0	ND	0	0	0	0	0	0	0	0	0	0	0	0	0
b0366	tauB taurine ABC transporter	0	0	0	0	0	0	0	0	0	0	0	0	0	0	0	0	0
b0367	tauC taurine ABC transporter	0	0	0	0	0	0	0	0	0	0	0	0	0	0	0	0	0
b0368	tauD taurine dioxygenase	0	0	0	0	0	0	-2.16247	0	ND	ND	0	0	0	ND	0	ND	0
b0369	hemB porphobilinogen synthase	0	0	ND	0	0	0	0	0	0	0	0	0	0	0	0	0	0
b0370	b0370	0	0	ND	0	0	0	0	0	0	0	0	0	0	0	0	0	0
b0371	yaiT conserved protein	-2.21309	0	0	0	0	0	0	0	0	0	0	0	0	0	0	0	0
b0373	insE-2 IS3 element protein InsE	0	0	0	-2.74779	0	0	0	0	0	0	0	0	0	0	0	0	0
b0375	yaiV predicted DNA-binding transcriptional regulator	0	0	0	-5.22636	0	0	0	0	0	0	0	0	0	0	0	0	0
b0376	ampH penicillin-binding protein	0	0	0	0	0	0	0	0	0	0	0	0	0	0	0	0	0
b0377	sbmA predicted transporter	0	0	3.16362	0	0	0	0	0	0	6.86533	0	0	0	0	0	0	0
b0378	yaiW predicted DNA-binding transcriptional regulator	0	0	0	0	0	0	0	0	0	3.50147	0	0	0	0	0	0	0
b0380	yaiZ predicted inner membrane protein	0	ND	ND	0	0	0	0	0	0	0	0	0	0	0	0	0	0
b0381	ddlA D-alanine-D-alanine ligase A	0	0	0	0	0	0	0	0	0	0	0	0	0	0	0	0	0
b0382	iraP anti-adaptor protein for sigma; S stabilization	0	0	ND	0	0	0	0	0	0	0	0	0	0	0	0	0	0
b0383	phoA alkaline phosphatase	0	0	0	0	0	0	0	0	0	0	0	0	0	0	0	0	0
b0384	psiF conserved protein	0	0	0	0	0	0	0	0	0	0	0	0	0	0	0	0	0
b0385	adrA predicted diguanylate cyclase	0	0	0	0	0	0	0	0	0	0	0	0	0	0	0	0	0
b0386	proC pyrroline-5-carboxylate-reductase	0	0	0	0	0	0	0	0	0	0	0	0	0	0	0	0	0
b0387	yaiI conserved protein	0	0	0	0	0	0	0	0	0	0	0	0	0	0	0	0	0
b0388	aroL shikimate kinase II	0	0	0	0	0	0	0	0	0	0	0	0	0	0	0	0	0
b0389	yaiA predicted protein	0	0	ND	0	0	0	0	0	0	0	0	0	0	0	0	0	0
b0390	aroM conserved protein	0	0	0	0	0	0	0	0	0	0	0	0	0	0	0	0	0
b0391	yaiE conserved protein	0	0	0	0	0	0	0	0	0	0	0	0	0	0	0	0	0
b0392	ykiA predicted protein	0	0	0	0	0	0	0	0	0	0	0	0	0	0	0	0	0
b0393	rdgC nonspecific DNA binding protein; nucleoid component	0	0	0	0	0	0	0	0	0	0	0	0	0	0	0	0	0
b0394	mak manno(fructo)kinase	0	0	0	0	0	0	0	0	0	0	0	0	0	0	0	0	0
b0395	b0395	0	0	0	0	0	0	0	0	0	0	0	0	0	0	0	0	0
b0396	araJ AraJ MFS transporter	0	0	0	-2.98501	0	0	0	0	0	0	0	0	0	0	0	0	0
b0397	sbcC ATP-dependent dsDNA exonuclease	0	0	0	0	0	0	0	0	0	0	0	0	0	0	0	0	0
b0398	sbcD ATP-dependent dsDNA exonuclease	0	0	0	0	0	0	0	0	0	0	0	0	0	0	0	0	0
b0399	phoB PhoB-Phosphorylated transcriptional dual regulator	0	0	0	0	0	0	0	0	0	0	0	0	0	0	0	0	0
b0400	phoR PhoR-P his	0	0	0	0	0	0	0	0	0	0	0	0	0	0	0	0	0
b0401	brnQ BrnQ branched chain amino acid LIVCS transporter	0	0	0	0	0	0	0	0	0	0	0	0	0	0	0	0	0
b0402	proY ProY cryptic proline APC transporter	0	0	0	0	0	0	0	0	0	0	0	0	0	0	0	0	0
b0403	malZ maltodextrin glucosidase	0	ND	ND	ND	0	0	0	0	0	0	0	0	0	0	0	0	0
b0405	queA S-adenosylmethionine:tRNA ribosyltransferase-isomerase	0	0	0	0	0	0	0	0	0	0	0	0	0	0	0	0	0
b0407	yajC Sec Protein Secretion Complex	0	0	0	0	0	0	0	0	0	0	0	0	0	0	0	0	0
b0408	secD Sec Protein Secretion Complex	0	0	0	0	0	0	0	0	0	0	0	0	0	0	0	0	0
b0409	secF Sec Protein Secretion Complex	0	0	0	0	0	0	0	0	0	0	0	0	0	0	0	0	0
b0411	tsx nucleoside channel; receptor of phage T6 and colicin K	0	0	0	0	0	0	0	0	0	0	0	0	0	0	0	0	0
b0412	yajI predicted lipoprotein	0	0	0	0	0	0	0	0	0	0	0	0	0	0	0	0	0
b0413	nrdR DNA-binding transcriptional regulator	3.38622	2.42363	3.07685	2.17688	0	0	0	0	0	0	0	0	0	0	0	0	0
b0414	ribD fused diaminohydroxyphosphoribosylaminopyrimidine deaminase / 5-amino-6-(5-phosphoribosylamino)uracil reductase	2.84877	0	0	2.32265	0	0	0	0	0	0	0	0	0	0	0	0	0
b0415	ribE 6,7-dimethyl-8-ribityllumazine synthase	0	0	0	0	0	0	0	0	0	0	0	0	0	0	0	0	0
b0416	nusB transcription antitermination protein NusB	0	0	0	0	0	0	0	0	0	0	0	0	0	0	0	0	0
b0417	thiL thiamine monophosphate kinase	0	ND	2.168	ND	0	0	0	0	0	0	0	ND	0	0	0	0	ND
b0418	pgpA phosphatidylglycerophosphatase A	0	0	0	0	0	0	0	0	0	0	0	0	0	0	0	0	0
b0419	yajO putative NAD(P)H-dependent xylose reductase	0	0	0	0	0	0	0	0	0	0	0	0	0	0	0	0	0
b0421	ispA geranyl diphosphate synthase / farnesyl diphosphate synthase	5.75803	4.73483	7.25025	2.72691	0	0	0	0	0	0	0	0	0	0	0	0	0
b0422	xseB exonuclease VII, small subunit	5.36719	3.30173	5.99032	3.94195	0	0	0	0	0	0	0	0	0	0	0	0	0
b0423	thiI ThiI	0	ND	ND	0	0	0	0	0	0	0	0	0	0	0	0	0	0
b0424	yajL conserved protein	0	0	0	0	0	0	0	0	0	0	0	0	0	0	0	0	0
b0425	panE 2-dehydropantoate reductase	0	0	0	3.02979	0	0	0	0	0	0	0	0	0	0	0	0	0
b0426	yajQ nucleotide binding protein	0	0	0	0	0	0	0	0	0	0	0	0	0	0	0	0	0
b0427	yajR YajR MFS transporter	3.34978	2.71135	0	0	0	0	0	0	0	0	0	0	0	0	0	0	0
b0428	cyoE heme O synthase	5.2843	4.7682	4.10126	4.45549	0	0	0	0	0	0	0	0	0	0	0	0	0
b0429	cyoD cytochrome bo terminal oxidase subunit IV	2.75976	0	0	0	0	0	0	0	0	0	0	0	0	0	0	0	0
b0430	cyoC cytochrome bo terminal oxidase subunit III	5.98594	6.15806	4.22723	5.39691	0	0	0	0	0	0	0	0	0	0	0	0	0
b0431	cyoB cytochrome bo terminal oxidase subunit I	5.20918	5.46667	4.45359	5.31271	0	-2.65125	0	0	0	0	0	0	0	0	0	0	0
b0432	cyoA cytochrome bo terminal oxidase subunit II	ND	ND	ND	3.76633	-1.58309	0	0	0	0	0	0	0	0	0	0	0	0
b0433	ampG AmpG muropeptide MFS transporter	0	4.02657	0	0	0	0	0	0	0	0	-2.87604	0	0	-2.85889	-2.43546	0	0
b0435	bolA BolA transcriptional dual regulator	0	0	0	0	0	0	0	0	0	0	0	0	0	0	0	0	0
b0436	tig trigger factor; a molecular chaperone involved in cell division	0	0	0	0	0	0	0	0	0	0	0	0	0	0	0	0	0
b0439	lon DNA-binding, ATP-dependent protease La	0	0	0	0	0	0	0	3.2228	4.20178	0	2.61147	0	0	1.93556	0	0	0
b0440	hupB Transcriptional dual regulator HU-beta;, NS1 (HU-1)	0	0	0	0	0	0	0	0	0	0	0	0	0	0	0	0	0
b0442	ybaV conserved protein	0	0	0	0	0	0	0	0	0	0	0	0	0	0	0	0	0
b0443	ybaW conserved protein	0	0	0	ND	0	0	0	0	0	0	0	0	0	0	0	0	0
b0444	queC enzyme in preQ 0 biosynthesis	0	0	0	0	0	0	0	0	0	0	0	0	0	0	0	0	0
b0446	cof pyridoxal phosphatase / HMP-PP hydrolase	0	0	0	0	0	0	0	0	0	0	0	0	0	0	0	0	0
b0447	ybaO putative LRP-like transcriptional regulator	0	0	0	0	0	0	0	0	0	0	0	0	0	0	0	0	0
b0448	mdlA predicted multidrug transporter subunit of ABC superfamily: ATP-binding component	0	0	0	0	0	0	0	0	0	0	0	0	0	0	0	0	0
b0449	mdlB predicted multidrug transporter subunit of ABC superfamily: ATP-binding component	0	0	0	0	0	0	0	0	0	0	0	0	0	0	0	0	0
b0450	glnK uridylyl-[GlnK]	0	0	0	0	0	0	0	0	0	0	0	0	0	0	0	0	0
b0451	amtB ammonium Amt transporter	0	0	0	0	0	0	0	0	0	0	0	0	0	0	0	0	0
b0452	tesB thioesterase II	0	0	0	0	0	0	0	0	0	0	0	0	0	0	0	0	0
b0453	ybaY predicted outer membrane lipoprotein	0	0	0	0	0	0	0	0	0	0	0	0	0	0	0	0	0
b0454	atl alkyltransferase-like protein	0	0	ND	0	0	0	0	0	0	0	0	0	0	0	0	0	0
b0457	ylaB conserved inner membrane protein	0	0	0	0	0	0	0	0	0	0	0	0	0	0	0	0	0
b0458	ylaC predicted inner membrane protein	0	0	0	0	0	0	0	0	0	0	0	0	0	0	0	0	0
b0462	acrB AcrB RND-type permease	0	0	0	0	-2.09008	0	0	-2.55747	-4.87641	0	-2.86238	-3.352	0	-2.58812	-3.48299	-3.84645	-3.52725
b0463	acrA AcrA Membrane Fusion Protein	0	0	0	0	0	0	0	0	0	0	0	0	0	0	0	0	0
b0464	acrR AcrR transcriptional repressor	0	0	0	0	3.9005	4.13431	0	4.92021	3.44844	2.95048	0	0	0	0	3.71911	3.70768	0
b0465	kefA KefA	ND	ND	ND	0	0	0	0	1.69098	0	0	0	0	0	0	0	0	0
b0466	ybaM predicted protein	0	ND	0	0	0	0	0	0	0	0	0	0	0	0	0	0	0
b0467	priC primosomal replication protein N''	0	0	0	0	0	0	0	0	0	0	0	0	0	0	0	0	0
b0468	ybaN conserved inner membrane protein	0	0	0	0	0	0	0	0	0	0	0	0	0	0	0	0	0
b0469	apt adenine phosphoribosyltransferase	0	0	0	0	0	0	0	0	0	0	0	0	0	0	0	0	0
b0471	ybaB conserved protein	0	0	0	0	0	0	0	0	0	0	0	0	0	0	0	0	0
b0472	recR recombination and repair	0	0	0	0	0	0	0	0	0	0	0	0	0	0	0	0	0
b0473	htpG HtpG monomer	0	0	0	0	0	0	0	0	0	0	0	0	0	0	0	0	0
b0474	adk adenylate kinase	0	0	0	0	0	0	0	0	0	0	0	0	0	0	0	0	0
b0475	hemH ferrochelatase	0	0	0	ND	0	0	0	0	0	0	0	0	0	0	0	0	0
b0476	aes acetyl-esterase	0	0	0	0	0	0	0	0	0	0	0	0	0	0	0	0	0
b0477	gsk guanosine kinase / inosine kinase	0	0	0	0	0	0	0	0	0	0	0	0	0	0	0	0	0
b0478	ybaL YbaL CPA2 transporter	0	0	0	0	0	0	0	0	0	0	0	0	0	0	0	0	0
b0479	fsr Fsr fosmidomycin MFS transporter	0	0	0	0	0	0	0	0	0	0	0	0	0	0	0	0	0
b0480	ushA 5'-nucleotidase / UDP-sugar hydrolase	0	0	0	0	0	0	0	0	0	0	0	0	0	0	0	0	0
b0481	ybaK Cys-tRNA Pro and Cys-tRNA Cys deacylase	0	0	0	0	0	0	0	0	0	0	0	0	0	0	0	0	0
b0482	ybaP conserved protein	0	0	0	0	0	0	0	0	0	0	0	0	0	0	0	0	0
b0483	ybaQ predicted DNA-binding transcriptional regulator	0	ND	ND	0	0	0	0	0	0	0	0	0	0	0	0	0	0
b0484	copA Cu +-exporting ATPase	0	0	0	0	0	0	0	0	0	0	0	0	0	0	0	0	0
b0486	ybaT YbaT APC transporter	0	0	0	0	0	0	0	0	0	0	0	0	0	0	0	0	0
b0487	cueR CueR transcriptional dual regulator	0	0	0	0	0	0	0	0	0	0	0	0	0	0	0	0	0
b0488	ybbJ conserved protein	0	0	0	0	0	0	0	0	0	0	0	0	0	0	0	0	0
b0489	qmcA putative protease	0	0	0	0	0	0	0	0	0	0	0	0	0	0	0	0	0
b0490	ybbL predicted transporter subunit: ATP-binding component of ABC superfamily	0	0	0	0	0	0	0	0	0	0	0	0	0	0	0	0	0
b0491	ybbM putative metal resistance protein	0	0	0	-4.06374	0	0	0	0	0	0	0	0	0	0	0	0	0
b0492	ybbN chaperone and weak protein oxidoreductase	0	0	0	0	0	0	0	0	0	0	0	0	0	0	0	0	0
b0494	tesA TAP complex	0	0	0	0	0	0	0	0	0	0	0	0	0	0	0	0	0
b0495	ybbA YbbA/YbbP ABC transporter	0	0	0	0	0	-2.77093	0	0	0	0	0	0	0	0	0	0	0
b0497	rhsD RhsD protein in rhs element	0	0	0	0	0	0	0	0	0	0	0	0	0	0	0	0	0
b0499	ylbH conserved protein, rhs-like	0	0	0	-3.14125	0	0	0	0	0	0	0	0	0	0	0	0	0
b0501	b0501	ND	0	ND	0	0	0	0	0	0	0	0	0	0	0	0	0	0
b0502	ylbG predicted DNA-binding transcriptional regulator	0	0	ND	0	0	0	0	0	0	0	0	0	0	0	0	0	0
b0503	ybbB tRNA 2-selenouridine synthase	0	0	0	-2.29291	0	0	0	0	0	0	0	0	0	0	0	0	0
b0504	allS AllS transcriptional activator	0	0	0	0	0	0	0	0	0	0	0	0	0	0	0	0	0
b0505	allA ureidoglycolate hydrolase	0	0	0	0	0	0	0	0	0	0	0	0	0	0	0	0	0
b0506	allR AllR transcriptional repressor	0	0	0	0	0	0	0	0	0	0	0	0	0	0	0	0	0
b0507	gcl glyoxylate carboligase	0	0	0	-2.46056	0	0	1.67407	0	0	0	0	0	0	0	0	0	0
b0508	hyi hydroxypyruvate isomerase	0	0	0	-2.83297	0	0	0	0	0	0	0	0	0	0	0	0	0
b0509	glxR tartronate semialdehyde reductase 2	0	0	0	-4.89699	0	0	0	0	0	0	0	0	0	0	0	0	0
b0510	ybbV predicted protein	ND	ND	ND	0	0	0	0	0	0	0	0	0	0	0	0	0	0
b0511	ybbW YbbW NCS1 Transporter	0	0	0	0	0	0	0	0	0	0	0	0	0	0	0	0	0
b0512	allB allantoinase	0	0	0	0	0	0	0	0	0	0	0	0	0	0	0	0	0
b0513	ybbY predicted uracil/xanthine transporter	0	0	0	-2.55563	0	0	0	0	0	0	0	0	0	0	0	0	0
b0514	glxK glycerate kinase II	0	0	0	-2.71988	0	0	0	0	0	0	0	0	0	0	0	0	0
b0515	ylbA conserved protein	0	0	0	-4.10956	0	0	0	0	0	0	0	0	0	0	0	0	0
b0516	allC allantoate amidohydrolase subunit	0	0	0	-2.79788	0	0	0	0	0	0	0	0	0	0	0	0	0
b0518	fdrA involved in protein transport; multicopy suppressor of dominant negative ftsH mutants	0	0	0	0	0	0	0	0	0	0	0	0	0	0	0	0	0
b0519	ylbE	0	0	0	0	0	0	0	0	0	0	0	0	0	0	0	0	0
b0520	ylbF conserved protein	0	0	0	0	0	0	0	0	0	0	0	0	0	0	0	0	0
b0522	purK N5-carboxyaminoimidazole ribonucleotide synthase monomer	0	0	0	0	0	0	0	0	0	0	0	0	0	0	0	0	0
b0523	purE N5-carboxyaminoimidazole ribonucleotide mutase	0	0	0	0	0	0	0	0	0	0	0	0	0	0	0	0	0
b0524	lpxH UDP-2,3-diacylglucosamine hydrolase	0	0	0	0	0	0	0	0	0	0	0	0	0	0	0	0	0
b0527	ybcI conserved inner membrane protein	0	0	0	0	0	0	0	0	0	0	0	0	0	0	0	0	0
b0528	ybcJ predicted RNA-binding protein	0	0	0	0	0	0	0	0	0	0	0	0	0	0	0	0	0
b0529	folD methyleneTHF enzyme	0	0	0	0	0	0	0	0	0	0	0	0	0	0	0	0	0
b0530	sfmA predicted fimbrial-like adhesin protein	0	0	0	-4.98796	0	0	0	0	0	0	0	0	0	0	0	0	0
b0532	sfmD putative outer membrane protein, export function	0	0	0	0	0	0	0	0	0	0	0	0	0	0	0	0	0
b0533	sfmH predicted fimbrial-like adhesin protein	0	0	0	0	0	0	0	0	0	0	0	0	0	0	0	0	0
b0535	fimZ FimZ transcriptional regulator	0	ND	ND	0	0	0	0	0	0	0	0	0	0	0	0	0	0
b0537	intD DLP12 prophage; predicted integrase	0	0	0	-2.81296	0	0	0	0	0	0	0	0	0	0	0	0	0
b0538	b0538 DLP12 prophage; putative sensory transduction regulator	ND	ND	ND	0	0	0	0	0	0	0	0	0	0	0	0	0	0
b0539	ybcC DLP12 prophage; predicted exonuclease	ND	ND	ND	0	0	0	0	0	0	0	0	0	0	0	0	0	0
b0540	insE-3 IS3 element protein InsE	0	0	0	-2.73825	0	0	0	0	0	0	0	0	0	0	0	0	0
b0541	insF-3 IS3 element protein InsF	0	0	0	-3.40591	0	0	0	0	0	0	0	0	0	0	0	0	0
b0542	renD DLP12 prophage; predicted protein	ND	ND	ND	0	0	0	0	0	0	0	0	0	ND	0	0	0	ND
b0544	ybcK DLP12 prophage; predicted recombinase	0	0	0	0	0	0	0	0	0	0	0	0	0	0	0	0	0
b0545	ybcL DLP12 prophage; predicted kinase inhibitor	0	ND	0	-5.37625	0	0	0	0	0	0	0	0	0	0	0	0	0
b0546	ybcM DLP12 prophage; predicted DNA-binding transcriptional regulator	ND	0	ND	0	0	0	0	0	0	0	0	0	0	0	0	0	0
b0547	ybcN DLP12 prophage; predicted protein	0	0	0	0	0	0	0	0	0	0	0	0	0	0	0	0	0
b0548	ninE DLP12 prophage, conserved protein similar to phage 82 and lambda proteins	ND	ND	ND	0	0	0	0	0	0	ND	0	0	0	0	0	0	0
b0549	ybcO DLP12 prophage; predicted protein	0	ND	0	ND	0	0	0	0	0	0	0	ND	0	0	0	0	ND
b0550	rusA endodeoxyribonuclease RUS (Holliday junction resolvase)	0	0	0	0	0	0	0	0	0	0	0	0	0	0	0	0	0
b0551	ybcQ Antitermination protein Q-like protein	0	0	0	0	0	0	0	0	0	0	0	0	0	0	0	0	0
b0552	insH-2 IS5 transposase and trans-activator	0	0	0	-2.33473	0	0	0	0	0	0	0	0	0	0	0	0	0
b0553	nmpC outer membrane porin protein; locus of qsr prophage	0	0	ND	0	0	0	0	0	0	0	0	0	0	0	0	0	0
b0554	essD DLP12 prophage; predicted phage lysis protein	0	0	0	0	0	0	0	0	0	0	0	0	0	0	0	0	0
b0555	ybcS DLP12 prophage; lysozyme	0	0	0	-3.57439	0	0	0	0	0	0	0	0	0	0	0	0	0
b0556	rzpD DLP12 prophage; predicted murein endopeptidase	0	0	0	-5.0384	0	0	0	0	0	0	0	0	0	0	0	0	0
b0557	borD bacteriophage lambda Bor protein homolog	ND	ND	ND	0	0	0	0	0	0	0	0	0	0	0	0	0	0
b0558	ybcV DLP12 prophage; predicted protein	ND	ND	ND	0	0	0	0	0	0	0	0	0	0	0	0	0	0
b0560	nohB DLP12 prophage; DNA packaging protein	0	0	0	0	0	0	0	0	0	0	0	0	0	0	0	0	0
b0562	ybcY DLP12 prophage; predicted SAM-dependent methyltransferase	ND	ND	ND	-2.97896	0	0	0	0	0	0	0	0	0	0	0	0	0
b0563	tfaX DLP12 prophage; predicted protein	0	0	ND	0	0	0	0	0	0	0	0	0	0	0	0	0	0
b0565	ompT outer membrane protease VII (outer membrane protein 3b)	0	0	0	0	0	0	0	0	0	0	0	0	0	0	0	0	0
b0566	envY EnvY transcriptional activator	0	-2.64835	0	-2.80965	0	0	0	0	0	0	0	0	0	0	0	0	0
b0568	nfrA bacteriophage N4 receptor, outer membrane protein	0	0	0	0	0	0	0	0	0	0	0	0	0	0	0	0	0
b0569	nfrB bacteriophage N4 receptor, inner membrane subunit	0	0	0	0	0	0	0	0	0	0	0	0	0	0	0	0	0
b0570	cusS putative 2-component sensor protein	0	ND	ND	0	0	0	0	0	0	0	0	0	0	0	0	0	0
b0571	cusR CusR transcriptional activator	ND	0	ND	0	0	0	0	0	0	0	0	0	0	0	0	0	0
b0572	cusC outer membrane factor of the CusCFBA copper efflux system	0	0	0	0	0	0	0	0	0	0	0	0	0	0	0	0	0
b0573	cusF periplasmic copper-binding protein	0	0	ND	0	0	0	0	0	0	0	0	0	0	0	0	0	0
b0574	cusB membrane fusion protein of the CusCFBA copper efflux system	0	0	0	0	0	0	0	0	0	0	0	0	0	0	0	0	0
b0575	cusA YbdE	0	0	0	0	0	0	0	0	0	0	0	0	0	0	0	0	0
b0576	pheP PheP phenylalanine APC transporter	0	0	0	0	0	0	0	0	0	0	0	0	0	0	0	0	0
b0577	ybdG predicted mechanosensitive channel	0	0	0	-3.74931	0	0	0	0	0	0	0	0	0	0	0	0	0
b0578	nfsB NfnB	0	0	0	0	0	0	0	0	0	0	0	0	0	0	0	0	0
b0579	ybdF conserved protein	0	ND	ND	0	0	0	0	0	0	0	0	0	0	0	0	0	0
b0580	ybdJ predicted inner membrane protein	ND	ND	ND	0	0	0	0	0	0	0	0	0	2.43532	0	0	0	0
b0581	ybdK gamma;-glutamyl:cysteine ligase YbdK	0	0	0	0	0	0	0	0	0	0	0	0	0	0	0	0	0
b0582	insL-2 IS186/IS421 transposase	0	0	0	0	0	0	0	0	0	0	0	0	0	0	0	0	0
b0583	entD phosphopantetheinyl transferase	0	0	0	ND	0	0	0	0	0	0	0	0	0	0	0	0	0
b0584	fepA FepA, outer membrane receptor for ferric enterobactin (enterochelin) and colicins B and D	0	0	-2.2142	0	0	0	0	0	0	0	0	0	0	0	-2.64196	0	0
b0585	fes enterochelin esterase	0	0	0	0	0	0	0	0	0	0	0	0	0	0	0	0	0
b0586	entF serine activating enzyme	0	0	0	0	0	0	0	0	0	0	0	0	0	0	0	0	0
b0587	fepE ferric enterobactin (enterochelin) transport	0	0	0	-3.19494	0	0	0	0	0	0	0	0	0	0	0	0	0
b0588	fepC Ferric Enterobactin Transport System	0	0	0	0	0	0	0	0	0	0	0	0	0	0	0	0	0
b0589	fepG Ferric Enterobactin Transport System	0	0	0	0	0	0	0	0	0	0	0	0	0	0	0	0	0
b0590	fepD Ferric Enterobactin Transport System	0	0	0	0	0	0	0	0	0	ND	0	0	0	0	0	0	0
b0591	entS EntS MFS transporter	0	0	0	0	0	0	0	0	0	0	0	0	0	0	0	0	0
b0592	fepB Ferric Enterobactin Transport System	0	0	0	0	0	-2.19508	0	0	0	0	0	0	0	0	0	0	0
b0593	entC isochorismate synthase 1	0	0	0	ND	0	0	0	0	0	0	0	0	0	0	0	0	0
b0594	entE enterobactin synthase multienzyme complex	0	0	0	0	0	0	0	0	0	ND	0	0	0	0	0	0	0
b0595	entB apo-EntB	0	0	0	0	0	0	0	0	0	0	0	0	0	0	0	0	0
b0596	entA 2,3-dihydro-2,3-dihydroxybenzoate dehydrogenase	0	0	0	0	0	0	0	0	0	0	0	0	0	0	0	0	0
b0597	entH thioesterase	0	ND	0	ND	0	0	0	0	0	0	0	0	0	0	0	0	0
b0598	cstA peptide transporter induced by carbon starvation	0	0	ND	0	0	0	0	0	0	0	0	0	0	0	0	0	0
b0599	ybdH predicted oxidoreductase	0	0	0	0	0	0	0	0	0	0	0	0	0	0	0	0	0
b0600	ybdL methionine aminotransferase, PLP-dependent	0	0	0	0	0	0	0	0	0	0	0	0	0	0	0	0	0
b0601	ybdM conserved protein	0	0	0	0	0	0	0	0	0	0	0	0	0	0	0	0	0
b0603	ybdO predicted DNA-binding transcriptional regulator LYSR-type	ND	ND	ND	0	0	0	0	0	0	0	0	0	ND	0	0	0	0
b0604	dsbG DsbG oxidized	0	0	0	0	0	0	0	0	0	0	0	0	0	0	0	0	0
b0605	ahpC AhpC component	0	0	0	0	0	0	0	0	0	0	0	0	0	0	0	0	0
b0606	ahpF AhpF component	0	0	0	0	0	0	0	0	0	0	0	0	0	0	0	0	0
b0607	uspG universal stress protein UP12	ND	ND	ND	0	0	0	0	0	0	0	0	0	0	0	0	0	0
b0608	ybdR predicted oxidoreductase, Zn-dependent and NAD(P)-binding	0	0	-6.447	0	0	0	0	0	0	0	0	0	0	0	0	0	0
b0609	b0609	0	0	ND	0	0	0	0	0	0	0	0	0	0	0	0	0	0
b0610	rnk regulator of nucleoside diphosphate kinase	0	0	0	0	0	0	0	0	0	0	0	0	0	0	0	0	0
b0611	rna RNase I, cleaves phosphodiester bond between any two nucleotides	0	0	0	0	0	0	0	0	0	0	0	0	0	0	0	0	0
b0613	citG triphosphoribosyl-dephospho-CoA synthase	0	0	0	0	0	0	0	0	0	0	0	0	0	0	0	0	0
b0614	citX apo-citrate lyase phosphoribosyl-dephospho-CoA transferase	0	0	0	0	0	0	0	0	0	0	0	0	0	0	0	0	0
b0615	citF citrate lyase, citrate-ACP transferase alpha; subunit	0	0	0	0	0	0	0	0	0	0	0	0	0	0	0	0	0
b0616	citE citrate lyase, citryl-ACP lyase beta; subunit	0	0	0	0	0	0	0	0	0	0	0	0	0	0	0	0	0
b0617	citD citrate lyase, acyl carrier gamma; subunit	0	ND	ND	0	0	0	0	0	0	0	0	0	0	0	0	0	0
b0618	citC citrate lyase synthetase	0	0	0	0	0	0	0	0	0	0	0	0	0	0	0	0	0
b0619	dpiB sensory histidine kinase in two-component regulatory system with DpiA	0	0	0	0	0	0	0	0	0	0	0	0	0	0	0	0	0
b0620	dpiA DNA-binding response regulator in two-component regulatory system with DpiB	0	ND	ND	0	0	0	0	0	0	0	0	0	ND	0	0	0	0
b0621	dcuC DcuC dicarboxylate transporter	0	0	0	0	0	0	0	0	0	0	0	0	0	0	0	0	0
b0622	pagP PagP monomer	0	0	0	-2.77077	0	0	0	0	0	0	0	0	0	0	0	0	0
b0623	cspE transcription antiterminator and regulator of RNA stability	0	0	ND	0	0	0	0	0	0	0	0	0	0	0	0	0	0
b0624	crcB protein involved in resistance to camphor-induced chromosome decondensation	0	0	ND	0	0	0	0	0	0	0	0	0	0	0	0	0	0
b0625	ybeH predicted protein	0	ND	ND	0	0	0	0	0	0	0	0	0	0	0	0	0	0
b0626	ybeM predicted C-N hydrolase superfamily, NAD(P)-binding amidase/nitrilase	0	0	0	0	0	0	0	0	0	0	0	0	0	0	0	0	0
b0627	tatE TatABCE protein export complex	ND	0	ND	0	0	0	0	0	0	0	0	0	0	0	0	0	0
b0628	lipA lipoate synthase monomer	5.63675	0	5.89911	0	0	0	0	0	0	0	0	0	0	0	0	0	0
b0629	ybeF predicted DNA-binding transcriptional regulator, LYSR-type	0	0	0	0	0	0	0	0	0	0	0	0	0	0	0	0	0
b0630	lipB lipoyl-protein ligase	5.94534	3.28349	6.40865	3.88419	0	0	0	0	0	0	0	0	0	0	0	0	0
b0631	ybeD conserved protein	ND	ND	ND	0	0	0	0	0	0	0	0	0	0	0	0	0	0
b0632	dacA D-alanyl-D-alanine carboxypeptidase, fraction A; penicillin-binding protein 5	0	0	0	0	0	0	0	0	0	0	0	0	0	0	0	0	0
b0633	rlpA rare lipoprotein RlpA	0	0	0	0	0	0	0	0	0	0	0	0	0	0	0	0	0
b0634	mrdB rod shape-determining membrane protein; sensitivity to radiation and drugs	0	0	0	0	0	0	0	0	0	0	0	0	0	0	0	0	0
b0635	mrdA cell shape; peptidoglycan synthetase; penicillin-binding protein 2	0	0	0	0	0	0	0	0	0	0	0	0	0	0	0	0	0
b0636	ybeA conserved protein	0	0	0	0	0	0	0	0	0	0	0	0	0	0	0	0	0
b0637	ybeB predicted protein	ND	ND	ND	ND	0	0	0	0	0	0	0	ND	0	0	0	0	ND
b0638	cobC predicted alpha;-ribazole-5'-P phosphatase	0	0	-2.70623	0	0	0	0	0	0	0	0	0	0	0	0	0	0
b0639	nadD nicotinate-mononucleotide adenylyltransferase	0	0	0	0	0	0	0	0	0	0	0	0	0	0	0	0	0
b0640	holA DNA polymerase III, delta; subunit	0	0	0	0	0	0	0	0	0	0	0	0	0	0	0	0	0
b0641	rlpB rare lipoprotein RlpB	0	0	0	0	0	0	0	0	0	0	0	0	0	0	0	0	0
b0643	ybeL putative alpha-helical protein	0	ND	0	0	0	0	0	0	0	0	0	0	0	0	0	0	0
b0644	ybeQ conserved protein	0	0	ND	0	0	0	0	0	0	0	0	0	0	0	0	0	0
b0645	ybeR predicted protein	0	0	0	ND	0	0	0	0	0	0	0	0	0	0	0	0	0
b0646	djlB predicted chaperone	0	0	0	-2.54753	0	0	0	0	0	0	0	0	0	0	0	0	0
b0649	djlC Hsc56, co-chaperone of Hsc62	0	0	0	0	0	0	0	0	0	0	0	0	0	0	0	0	0
b0650	hscC Hsc62, Hsp70 family chaperone, binds to RpoD and inhibits transcription	0	0	0	0	0	0	0	0	0	0	0	0	0	0	0	0	0
b0651	rihA ribonucleoside hydrolase 1 (pyrimidine-specific)	0	0	0	0	0	0	0	0	0	0	0	0	0	0	0	0	0
b0653	gltK GltIJKL glutamate ABC transporter	0	0	0	0	0	0	0	0	0	0	0	0	0	0	0	0	0
b0654	gltJ GltIJKL glutamate ABC transporter	0	0	0	0	0	-2.25039	0	0	0	0	0	0	0	0	0	0	0
b0655	gltI GltIJKL glutamate ABC transporter	0	0	0	0	0	0	0	0	0	0	0	0	0	0	0	0	0
b0656	insH-3 IS5 transposase and trans-activator	0	0	0	-2.64708	0	0	0	0	0	0	0	0	0	0	0	0	0
b0657	lnt apolipoprotein N-acyltransferase	0	0	0	0	0	0	0	0	0	0	0	0	0	0	0	0	0
b0658	ybeX predicted ion transport protein	0	0	0	0	0	0	0	0	0	0	0	0	0	0	0	0	0
b0659	ybeY conserved protein	0	0	0	0	0	0	0	0	0	0	0	0	0	0	0	0	0
b0660	ybeZ predicted protein with nucleoside triphosphate hydrolase domain	3.08031	0	0	0	0	0	0	0	0	0	0	0	0	0	0	0	0
b0661	miaB isopentenyl-adenosine A37 tRNA methylthiolase MiaB	ND	ND	0	0	0	0	0	0	0	0	0	0	0	0	0	0	0
b0662	ubiF 2-octaprenyl-3-methyl-6-methoxy-1,4-benzoquinone hydroxylase	8.63397	5.54829	11.0965	5.65879	0	0	0	0	0	0	0	0	0	0	0	0	0
b0667	b0667	0	0	ND	0	0	0	0	0	0	0	0	0	ND	0	0	0	0
b0669	b0669	ND	ND	ND	ND	0	ND	0	0	0	ND	0	0	ND	0	0	0	ND
b0671	b0671	0	0	0	0	0	0	0	0	0	0	0	0	0	0	0	0	0
b0674	asnB asparagine synthetase B	0	0	0	0	0	0	0	0	0	0	0	0	0	0	0	0	0
b0675	nagD ribonucleotide monophosphatase	0	0	0	0	0	0	0	0	0	0	0	0	0	0	0	0	0
b0676	nagC NagC transcriptional dual regulator	0	0	0	0	0	0	0	0	0	0	0	0	0	0	0	0	0
b0677	nagA N-acetylglucosamine-6-phosphate deacetylase	0	0	0	0	0	0	0	0	0	0	0	0	0	0	0	0	0
b0678	nagB glucosamine-6-phosphate deaminase	0	0	0	0	0	0	0	0	0	0	0	0	0	0	0	0	0
b0679	nagE N-acetylglucosamine PTS permease	0	0	0	0	0	0	0	0	0	0	0	0	0	0	0	0	0
b0680	glnS glutaminyl-tRNA synthetase	0	0	0	0	0	0	0	0	0	0	0	0	0	0	0	0	0
b0681	ybfM predicted outer membrane porin	0	0	0	0	0	0	0	0	0	0	0	0	0	0	0	0	0
b0682	ybfN predicted lipoprotein	ND	ND	ND	0	0	0	0	0	0	0	0	0	0	0	0	0	0
b0683	fur Fur-Fe+2 transcriptional dual regulator	ND	ND	ND	0	0	0	0	0	0	0	0	0	ND	0	0	0	0
b0684	fldA oxidized flavodoxin 1	0	0	0	0	0	0	0	0	0	0	0	0	0	0	0	0	0
b0685	ybfE LexA-regulated protein	0	0	0	0	0	0	0	0	0	0	0	0	0	0	0	0	0
b0686	ybfF esterase	0	0	ND	0	0	0	0	0	0	0	0	0	0	0	0	0	0
b0687	seqA SeqA, negative modulator of initiation of replication	0	0	0	0	0	ND	0	0	0	0	0	0	0	0	0	0	0
b0688	pgm phosphoglucomutase	0	0	ND	0	0	0	0	0	0	0	0	0	0	0	0	0	0
b0690	ybfG	ND	0	ND	0	0	0	0	0	0	0	0	0	ND	0	0	0	0
b0691	ybfH	ND	0	ND	0	0	0	0	0	0	0	0	0	0	0	0	0	0
b0692	potE putrescine/proton symporter: putrescine/ornithine antiporter	0	0	0	0	0	0	0	0	0	0	0	0	0	0	0	0	0
b0693	speF ornithine decarboxylase, degradative	0	0	0	0	0	0	0	0	0	0	0	0	0	0	0	0	0
b0694	kdpE KdpE-Phosphorylated transcriptional activator	0	0	0	0	0	0	0	0	0	0	0	0	0	0	0	0	0
b0695	kdpD KdpD-P his	ND	ND	ND	0	0	0	0	0	0	0	0	0	0	0	0	0	0
b0696	kdpC potassium ion P-type ATPase transporter	0	0	0	0	0	0	0	0	0	0	0	0	0	0	0	0	0
b0697	kdpB potassium ion P-type ATPase transporter	0	0	0	0	0	0	0	0	0	0	0	0	0	0	0	0	0
b0698	kdpA potassium ion P-type ATPase transporter	0	0	0	0	0	0	0	0	0	0	0	0	0	0	0	0	0
b0699	ybfA predicted protein	ND	0	ND	0	0	0	0	0	0	0	0	0	0	0	0	0	0
b0701	rhsC_2 RhsC element protein	0	0	0	0	0	0	0	0	0	0	0	0	0	0	0	0	0
b0703	ybfO putative rhs protein	0	0	0	0	0	0	0	0	0	0	0	0	0	0	0	0	0
b0704	ybfC predicted protein	ND	0	0	0	0	0	0	0	0	0	0	0	0	0	0	0	0
b0705	ybfL predicted transposase; receptor protein	ND	ND	ND	ND	0	0	0	0	0	ND	0	0	0	0	0	0	0
b0706	ybfD putative DNA ligase	-2.32136	0	0	0	0	0	0	0	0	0	0	0	0	0	0	0	0
b0707	ybgA conserved protein	0	0	0	-3.56066	0	0	0	0	0	0	0	0	0	0	0	0	0
b0708	phr deoxyribodipyrimidine photolyase (photoreactivation)	0	0	0	0	0	0	0	0	0	0	0	0	0	0	0	0	0
b0709	ybgH YbgH peptide POT Transporter	0	0	0	0	0	0	0	0	0	0	0	0	0	0	0	0	0
b0710	ybgI conserved metal-binding protein	0	0	0	0	0	0	0	0	0	0	0	0	0	0	0	0	0
b0711	ybgJ putative carboxylase	0	0	0	0	0	0	0	0	0	0	0	0	0	0	0	0	0
b0712	ybgK putative carboxylase	0	0	0	0	0	0	0	0	0	0	0	0	0	0	0	0	0
b0713	ybgL predicted lactam utilization protein	0	0	0	0	0	0	0	0	0	0	0	0	0	0	0	0	0
b0714	nei endonuclease VIII	0	0	0	0	0	0	0	0	0	0	0	0	0	0	0	0	0
b0715	abrB predicted regulator	0	0	0	0	0	0	0	0	0	0	0	0	0	0	0	0	0
b0716	ybgO predicted fimbrial-like adhesin protein	0	ND	0	ND	0	0	0	0	0	0	0	0	0	0	0	0	0
b0717	ybgP putative chaperone	0	0	0	0	0	0	0	0	0	0	0	0	0	0	0	0	0
b0718	ybgQ predicted outer membrane protein	0	0	0	-2.54409	0	0	0	0	0	0	0	0	0	0	0	0	0
b0719	ybgD predicted fimbrial-like adhesin protein	0	0	ND	-2.55216	0	0	0	0	0	0	0	0	0	0	0	0	0
b0720	gltA citrate synthase monomer	0	0	0	0	0	0	0	0	0	0	0	0	0	0	0	0	0
b0721	sdhC succinate dehydrogenase membrane protein	0	0	0	ND	0	0	0	0	0	0	0	0	0	0	0	0	0
b0722	sdhD succinate dehydrogenase membrane protein	0	ND	0	ND	0	0	0	0	0	0	0	0	0	0	0	0	0
b0723	sdhA succinate dehydrogenase flavoprotein	0	4.55487	0	2.90265	0	0	0	0	0	0	0	0	0	0	0	0	0
b0724	sdhB succinate dehydrogenase iron-sulfur protein	0	4.19762	0	3.94831	0	0	0	0	0	0	0	0	0	0	0	0	0
b0725	b0725	ND	0	ND	2.8905	0	0	0	0	0	0	0	0	0	0	0	0	0
b0727	sucB SucB-lipoate	0	2.19921	0	0	0	0	0	0	0	0	0	0	0	0	0	0	0
b0728	sucC succinyl-CoA synthetase, beta; subunit	0	0	0	0	0	0	0	0	0	0	0	0	0	0	0	0	0
b0729	sucD succinyl-CoA synthetase, alpha; subunit	0	0	0	0	0	0	0	0	0	0	0	0	0	0	0	0	0
b0730	mngR MngR-acyl-CoA	0	0	0	0	0	0	0	0	0	0	0	0	0	0	0	0	0
b0731	mngA 2-O-alpha;-mannosyl-D-glycerate transporting phosphotransferase system	0	0	0	0	0	0	0	0	0	0	0	0	0	0	0	0	0
b0732	mngB alpha;-mannosidase	0	0	ND	0	0	0	0	0	0	0	0	0	0	0	0	0	0
b0733	cydA cytochrome bd-I terminal oxidase subunit I	4.0044	0	4.61768	0	0	0	0	0	0	0	0	0	0	0	0	0	0
b0734	cydB cytochrome bd-I terminal oxidase subunit II	3.58997	0	3.4598	0	0	0	0	0	0	0	0	0	0	0	0	0	0
b0735	ybgE putative lipoprotein	0	0	0	0	0	0	0	0	0	0	0	0	0	0	0	0	0
b0736	ybgC esterase/thioesterase	0	0	0	0	0	0	0	0	0	0	0	0	0	0	0	0	0
b0737	tolQ The Colicin A Import System	0	ND	0	ND	0	0	0	0	0	0	0	ND	0	0	0	0	ND
b0738	tolR The Colicin A Import System	0	0	0	0	0	0	0	0	0	0	0	0	0	0	0	0	0
b0739	tolA The Colicin A Import System	0	0	0	0	0	0	0	0	0	0	0	0	0	0	0	0	0
b0740	tolB The Colicin A Import System	0	0	0	0	0	0	0	0	0	0	0	0	0	0	0	0	0
b0741	pal The Colicin A Import System	0	0	0	0	0	0	0	0	0	0	0	0	0	0	0	0	0
b0742	ybgF predicted periplasmic protein	0	0	0	0	0	0	0	0	0	0	0	0	0	0	0	0	0
b0750	nadA quinolinate synthase	0	0	0	0	0	0	0	0	0	0	0	0	0	0	0	0	0
b0751	pnuC PnuC NMN transporter	0	0	ND	0	0	0	0	0	0	0	0	0	0	0	0	0	0
b0752	zitB ZitB zinc CDF transporter	0	0	0	0	0	0	0	0	0	0	0	0	0	0	0	0	0
b0753	ybgS conserved protein	0	0	0	0	-1.59463	-2.15488	0	0	0	0	0	0	0	0	0	0	0
b0754	aroG 2-dehydro-3-deoxyphosphoheptonate aldolase	0	0	0	0	-1.77697	0	0	0	0	0	0	0	0	0	0	0	0
b0755	gpmA phosphoglyceromutase 1 monomer	5.95112	4.45953	6.49158	3.69079	0	0	0	0	0	0	0	0	0	0	0	0	0
b0756	galM aldose-1-epimerase	0	0	0	0	0	0	0	0	0	0	0	0	0	0	0	0	0
b0757	galK galactokinase	0	0	0	0	0	0	0	0	0	0	0	0	0	0	0	0	0
b0758	galT UDP-glucose-hexose-1-phosphate uridylyltransferase [multifunctional]	0	0	0	0	0	0	0	0	0	0	0	0	0	0	0	0	0
b0759	galE UDP-glucose 4-epimerase monomer	0	0	ND	0	0	0	0	0	0	0	0	0	0	0	0	0	0
b0760	modF ModF	0	0	0	0	0	0	0	0	0	0	0	0	0	0	0	0	0
b0761	modE ModE-MoO 4 2- transcriptional dual regulator	0	0	0	0	0	0	0	0	0	0	0	0	0	0	0	0	0
b0762	ybhT predicted protein	0	0	0	0	0	0	0	0	0	0	0	0	0	0	0	0	0
b0763	modA molybdate ABC transporter	0	0	0	0	0	0	0	0	0	0	0	0	0	0	0	0	0
b0764	modB molybdate ABC transporter	0	0	0	0	0	0	0	0	0	0	0	0	0	0	0	0	0
b0765	modC molybdate ABC transporter	0	0	0	0	0	0	0	0	0	0	0	0	0	0	0	0	0
b0766	ybhA pyridoxal phosphatase / fructose 1,6-bisphosphatase	ND	ND	ND	ND	0	ND	0	0	0	0	ND	ND	0	0	ND	0	ND
b0767	pgl 6-phosphogluconolactonase	0	0	0	0	0	0	0	0	0	0	0	0	0	0	0	0	0
b0768	ybhD predicted DNA-binding transcriptional regulator	0	ND	0	0	0	0	0	0	0	0	0	0	0	0	0	0	0
b0769	ybhH conserved protein	0	0	0	0	0	0	0	0	0	0	0	0	0	0	0	0	0
b0770	ybhI YbhI DASS Transporter	0	0	0	-2.27547	0	0	0	0	0	0	0	0	0	0	0	0	0
b0771	ybhJ predicted hydratase	0	ND	ND	0	0	0	0	0	0	0	0	0	0	0	0	0	0
b0772	ybhC esterase/thioesterase	0	0	0	0	0	0	0	0	0	0	0	0	0	0	0	0	0
b0773	ybhB predicted kinase inhibitor	0	0	0	0	0	0	0	0	0	0	0	0	0	0	0	0	0
b0774	bioA adenosylmethionine-8-amino-7-oxononanoate aminotransferase monomer	0	0	0	0	0	0	0	0	0	0	0	0	0	0	0	0	0
b0775	bioB biotin synthase monomer	0	0	0	0	0	0	0	0	0	0	0	0	0	0	0	0	0
b0776	bioF 8-amino-7-oxononanoate synthase monomer	-2.8952	0	0	0	0	0	0	0	0	0	0	0	0	0	0	0	0
b0777	bioC predicted methyltransferase, enzyme of biotin synthesis	0	0	0	0	0	0	0	1.89895	0	0	0	0	0	0	0	0	0
b0778	bioD dethiobiotin synthetase monomer	0	0	0	0	0	0	0	0	0	0	0	0	0	0	0	0	0
b0779	uvrB DNA repair; excision nuclease subunit B	0	0	0	0	0	0	0	0	0	0	0	0	0	0	0	0	0
b0780	ybhK predicted transferase with NAD(P)-binding Rossmann-fold domain	0	0	0	0	0	0	0	0	0	0	0	0	0	0	0	0	0
b0781	moaA molybdopterin biosynthesis, protein A	0	0	0	0	0	0	0	0	0	0	0	0	0	0	0	0	0
b0782	moaB MoaB subunit	0	0	0	0	0	0	0	0	0	0	0	0	0	0	0	0	0
b0783	moaC molybdopterin biosynthesis, protein C	0	0	0	0	0	0	0	0	0	0	0	0	0	0	0	0	0
b0784	moaD molybdopterin synthase small subunit	0	0	0	ND	0	0	0	0	0	0	0	0	0	0	0	0	0
b0785	moaE molybdopterin synthase large subunit	0	0	0	0	0	0	0	0	0	0	0	0	0	0	0	0	0
b0786	ybhL putative transport protein	0	0	0	0	0	0	0	0	0	0	0	0	0	0	0	0	0
b0787	ybhM conserved inner membrane protein	0	0	0	0	0	0	0	0	0	0	0	0	0	0	0	0	0
b0788	ybhN conserved inner membrane protein; predicted DNA-binding transcriptional regulator	0	0	0	-2.23896	0	0	0	0	0	0	0	0	0	0	0	0	0
b0789	ybhO cardiolipin synthase 2	0	0	0	0	0	0	0	0	0	0	0	0	0	0	0	0	0
b0790	ybhP predicted DNase	0	0	0	0	0	0	0	0	0	0	0	0	0	0	0	0	0
b0791	ybhQ predicted inner membrane protein	0	0	0	0	0	0	0	0	0	0	0	0	0	0	0	0	0
b0792	ybhR YbhF/YbhR/YbhS ABC transporter	0	0	0	0	0	0	0	0	0	0	0	0	0	0	0	0	0
b0793	ybhS YbhF/YbhR/YbhS ABC transporter	0	0	0	0	0	0	0	0	0	0	0	0	0	0	0	0	0
b0794	ybhF YbhF/YbhR/YbhS ABC transporter	0	0	0	0	0	0	0	0	0	0	0	0	0	0	0	0	0
b0795	ybhG predicted membrane fusion protein	0	0	0	0	0	0	0	0	0	0	0	0	0	0	0	0	0
b0796	ybiH predicted DNA-binding transcriptional regulator	0	0	0	0	0	0	0	0	0	0	0	0	0	0	0	0	0
b0797	rhlE DEAD-box-containing ATP-dependent RNA helicase family member	0	0	0	0	-1.80453	0	0	0	0	0	0	0	0	0	0	0	0
b0798	ybiA conserved protein	0	0	0	0	-1.98212	0	0	0	0	0	0	0	0	0	0	0	0
b0799	dinG ATP-dependent helicase	0	0	0	0	0	0	0	0	0	0	0	0	0	0	0	0	0
b0800	ybiB predicted transferase/phosphorylase	0	0	0	0	0	0	0	0	0	0	0	0	0	0	0	0	0
b0801	ybiC predicted dehydrogenase	0	0	0	0	0	0	0	0	0	0	0	0	0	0	0	0	0
b0802	ybiJ predicted protein	0	0	0	0	0	0	0	0	0	0	0	0	0	0	0	0	0
b0803	ybiI conserved protein	0	0	0	0	0	0	0	0	0	0	0	0	0	0	0	0	0
b0804	ybiX conserved protein	0	0	0	0	0	0	0	0	0	0	0	0	0	0	0	0	0
b0805	fiu putative outer membrane receptor for iron transport	0	0	0	0	0	0	0	0	0	0	0	0	0	0	0	0	0
b0806	ybiM predicted protein	0	0	0	0	0	0	0	0	0	0	0	0	0	0	0	0	0
b0807	ybiN predicted SAM-dependent methyltransferase	0	0	0	0	0	0	0	0	0	0	0	0	0	0	0	0	0
b0808	ybiO predicted mechanosensitive channel	0	ND	0	ND	0	0	0	0	0	0	0	0	0	0	0	0	0
b0809	glnQ glutamine ABC transporter	0	0	0	0	0	0	0	0	0	0	0	0	0	0	0	0	0
b0810	glnP glutamine ABC transporter	0	0	0	0	0	0	0	0	0	ND	0	0	0	0	0	0	0
b0811	glnH glutamine ABC transporter	0	0	0	0	0	0	0	0	0	0	0	0	0	0	0	0	0
b0812	dps stationary phase nucleoid protein that sequesters iron and protects DNA from damage	0	0	0	0	0	0	0	0	0	0	0	0	0	0	0	0	0
b0813	rhtA threonine and homoserine exporter	0	0	ND	0	0	0	0	0	0	0	0	0	0	0	0	0	0
b0814	ompX outer membrane protein X	0	0	0	0	0	0	0	0	0	0	0	0	0	0	0	0	0
b0815	ybiP predicted hydrolase, inner membrane	0	0	ND	ND	0	0	0	0	0	0	0	0	0	0	0	0	0
b0816	yliL predicted protein	0	0	0	0	0	0	0	0	0	0	0	0	0	0	0	0	0
b0817	mntR MntR transcriptional repressor	0	0	0	0	0	0	0	0	0	0	0	0	0	0	0	0	0
b0818	ybiR predicted transporter	0	0	0	0	0	0	0	0	0	0	0	0	0	0	0	0	0
b0819	ybiS conserved protein	0	0	0	0	-2.23958	0	0	-1.79325	0	0	0	0	0	0	0	0	0
b0820	ybiT putative ATP-binding component of a transport system	0	ND	0	ND	0	0	0	0	0	0	0	ND	0	0	0	0	ND
b0821	ybiU predicted protein	0	0	0	0	0	0	0	0	0	0	0	0	0	0	0	0	0
b0822	ybiV sugar phosphatase	0	0	0	0	0	0	0	0	0	0	0	0	0	0	0	0	0
b0823	ybiW predicted pyruvate formate lyase	0	0	0	0	0	0	0	0	0	0	0	0	0	0	0	0	0
b0824	ybiY predicted pyruvate formate lyase activating enzyme	0	0	0	0	0	0	0	0	0	0	0	0	0	0	0	0	0
b0825	fsaA Fsa	0	0	0	0	0	0	0	0	0	0	0	0	0	0	0	0	0
b0826	moeB molybdopterin biosynthesis	0	0	0	0	0	0	0	0	0	0	0	0	0	0	0	0	0
b0827	moeA molybdopterin biosynthesis	0	0	0	0	0	0	0	0	0	0	0	0	0	0	0	0	0
b0828	iaaA beta; cleavage product of IaaA	0	0	0	0	0	0	0	0	0	0	0	0	0	0	0	0	0
b0829	gsiA gsiABCD glutathione ABC transporter	0	0	0	0	0	0	0	0	0	0	0	0	0	0	0	0	0
b0830	gsiB gsiABCD glutathione ABC transporter	0	0	0	0	0	0	0	0	0	0	0	0	0	0	0	0	0
b0831	gsiC gsiABCD glutathione ABC transporter	0	0	0	0	0	0	0	0	0	0	0	0	0	0	0	0	0
b0832	gsiD gsiABCD glutathione ABC transporter	0	0	0	0	0	0	0	0	0	0	0	0	0	0	0	0	0
b0834	yliF putative lipoprotein	0	0	0	0	0	0	0	0	0	0	0	0	0	0	0	0	0
b0835	yliG predicted SAM-dependent methylase	0	0	0	0	0	0	0	0	0	0	0	0	0	0	0	0	0
b0836	bssR regulator of biofilm formation	0	ND	0	0	0	0	0	0	0	0	0	0	0	0	0	0	0
b0837	yliI aldose sugar dehydrogenase	0	0	0	0	0	0	0	0	0	0	0	0	0	0	0	0	0
b0838	yliJ predicted glutathione S-transferase	0	0	0	-2.70365	0	0	0	0	0	0	0	0	0	0	0	0	0
b0839	dacC penicillin-binding protein 6	0	0	0	0	0	0	0	0	0	0	0	0	0	0	0	0	0
b0840	deoR DeoR transcriptional repressor	0	0	0	0	0	0	0	0	0	0	0	0	0	0	0	0	0
b0841	ybjG undecaprenyl pyrophosphate phosphatase	0	0	0	0	0	0	0	0	0	0	0	0	0	0	0	0	0
b0842	cmr MdfA/Cmr MFS multidrug transporter	0	0	0	0	0	0	0	0	0	0	0	0	0	0	0	0	0
b0843	ybjH predicted protein	0	0	0	0	0	0	0	0	0	0	0	0	0	0	0	0	0
b0844	ybjI FMN phosphatase	0	0	0	0	-1.94848	0	0	0	0	0	0	0	0	0	0	0	0
b0845	ybjJ predicted transporter	0	0	0	0	0	0	0	0	0	0	0	0	0	0	0	0	0
b0846	ybjK predicted DNA-binding transcriptional regulator	0	0	0	0	0	0	0	0	0	0	0	0	0	0	0	0	0
b0847	ybjL predicted transporter	0	0	0	0	0	0	0	0	0	0	0	0	0	0	0	0	0
b0848	ybjM predicted inner membrane protein	-2.88494	0	0	ND	0	0	0	0	0	0	0	0	0	0	0	0	0
b0849	grxA oxidized glutaredoxin 1	0	0	0	0	0	0	0	0	0	0	0	0	0	0	0	0	0
b0850	ybjC predicted inner membrane protein	0	0	0	0	0	0	0	0	0	0	0	0	3.60194	0	0	0	0
b0851	nfsA NADPH nitroreductase	0	0	0	0	0	0	0	0	0	0	0	0	2.24322	0	0	0	0
b0852	rimK ribosomal protein S6 modification protein	0	0	0	0	0	0	0	0	0	0	0	0	0	0	0	0	0
b0853	ybjN predicted oxidoreductase	0	0	0	0	0	0	0	0	0	0	0	0	0	0	0	0	0
b0854	potF putrescine ABC transporter	0	0	0	0	0	0	0	0	0	0	0	0	0	0	0	0	0
b0855	potG putrescine ABC transporter	0	0	0	0	0	0	0	0	0	0	0	0	0	0	0	0	0
b0856	potH putrescine ABC transporter	0	0	0	0	0	-2.29946	0	0	0	0	0	0	0	0	0	0	0
b0857	potI putrescine ABC transporter	0	0	0	0	0	-2.47386	0	-1.91638	0	0	0	0	0	0	0	0	0
b0858	ybjO predicted inner membrane protein	0	0	0	0	0	0	0	0	0	0	0	0	0	0	0	0	0
b0859	rumB 23S ribosomal RNA 5-methyluridine methyltransferase	0	0	0	0	0	0	0	0	0	0	0	0	0	0	0	0	0
b0860	artJ arginine ABC transporter	0	0	ND	0	0	0	0	0	0	0	0	0	0	0	0	0	0
b0861	artM arginine ABC transporter	0	0	0	0	0	0	0	0	0	0	0	0	0	0	0	0	0
b0862	artQ arginine ABC transporter	0	0	0	0	0	0	0	0	0	0	0	0	0	0	0	0	0
b0863	artI arginine ABC transporter	0	0	0	0	0	0	0	0	0	0	0	0	0	0	0	0	0
b0864	artP arginine ABC transporter	0	0	0	0	0	0	0	0	0	0	0	0	0	0	0	0	0
b0865	ybjP predicted lipoprotein	0	0	0	0	0	0	0	0	0	0	0	0	0	0	0	0	0
b0866	ybjQ conserved protein	0	0	0	0	0	0	0	0	0	0	0	0	0	0	0	0	0
b0867	amiD anhydro-N-acetylmuramoyl-L-alanine amidase	0	0	0	0	0	0	0	0	0	0	0	0	0	0	0	0	0
b0868	ybjS predicted NAD(P)H-binding oxidoreductase with NAD(P)-binding Rossmann-fold domain	0	0	0	0	0	0	0	0	0	0	0	0	0	0	0	0	0
b0869	ybjT conserved protein with NAD(P)-binding Rossmann-fold domain	0	0	0	0	0	0	0	0	0	0	0	0	0	0	0	0	0
b0870	ltaE LtaA	0	0	0	0	0	0	0	0	0	0	0	0	0	0	0	0	0
b0871	poxB pyruvate oxidase monomer	0	0	ND	0	0	0	0	0	0	0	0	0	0	0	0	0	0
b0873	hcp hybrid-cluster protein	0	0	-2.57445	0	0	0	0	0	0	0	0	0	0	0	0	0	0
b0874	ybjE predicted transporter	0	0	0	0	0	2.18278	0	0	0	0	0	0	0	0	0	0	0
b0875	aqpZ AqpZ - water MIP channel	0	0	0	0	0	0	0	0	0	0	0	0	0	0	0	0	0
b0876	ybjD conserved protein with a nucleotide triphosphate hydrolase domain	0	0	0	0	0	0	0	0	0	0	0	0	0	0	0	0	0
b0877	ybjX conserved protein	0	0	0	0	0	0	0	0	0	0	0	0	0	0	0	0	0
b0878	macA MacAB-TolC Macrolide Efflux Transport System	0	0	0	0	0	0	0	0	0	0	0	0	0	0	0	0	0
b0879	macB MacAB-TolC Macrolide Efflux Transport System	0	0	0	0	0	0	0	0	0	0	0	0	0	0	0	0	0
b0880	cspD DNA replication inhibitor	0	0	0	0	0	0	0	0	0	0	0	0	0	0	0	0	0
b0881	clpS specificity factor for ClpA-ClpP chaperone-protease complex	0	0	0	0	0	0	0	0	0	0	0	0	0	0	0	0	0
b0884	infA protein chain initiation factor IF-1	0	0	ND	0	0	0	0	0	0	0	0	0	0	0	0	0	0
b0885	aat leucyl, phenylalanyl-tRNA-protein transferase	0	0	0	0	0	0	0	0	0	0	0	0	0	0	0	0	0
b0886	cydC cydDC glutathione ABC transporter	0	0	0	0	0	0	0	0	0	0	0	0	0	0	0	0	0
b0888	trxB thioredoxin reductase monomer	0	0	0	0	0	0	0	2.00773	2.52291	0	0	0	0	0	3.97987	0	0
b0889	lrp Lrp transcriptional dual regulator	0	0	0	0	0	0	0	0	0	0	0	0	0	0	2.57132	0	0
b0891	lolA periplasmic chaperone, effects translocation of lipoproteins from inner membrane to outer	0	0	0	0	0	0	0	0	0	0	0	0	0	0	0	0	0
b0892	rarA recombination factor	0	0	0	0	0	0	0	0	0	0	0	0	0	0	0	0	0
b0893	serS seryl-tRNA synthetase	0	0	0	0	0	0	0	0	0	0	0	0	0	0	0	0	0
b0894	dmsA dimethyl sulfoxide reductase, chain A	0	0	ND	0	0	0	0	0	0	0	0	0	0	0	0	0	0
b0895	dmsB dimethyl sulfoxide reductase, chain B	0	0	0	0	0	0	0	0	0	0	0	0	0	0	0	0	0
b0896	dmsC dimethyl sulfoxide reductase, chain C	0	0	0	0	0	0	0	0	0	0	0	0	0	0	0	0	0
b0897	ycaC predicted hydrolase monomer	0	0	0	0	0	0	0	0	0	0	0	0	0	0	0	0	0
b0898	ycaD YcaD MFS transporter	0	0	0	0	0	0	0	0	0	0	0	0	0	0	0	0	0
b0899	ycaM YcaM predicted APC amino acid transporter	0	0	0	-4.82043	0	0	0	0	0	0	0	0	0	0	0	0	0
b0900	ycaN putative transcriptional regulator LYSR-type	0	0	0	-4.1565	0	0	0	0	0	0	0	0	0	0	0	0	0
b0901	ycaK YcaK	0	0	0	0	0	0	0	0	0	0	0	0	0	0	0	0	0
b0902	pflA pyruvate formate-lyase activating enzyme	0	0	0	0	0	0	0	0	0	0	0	0	0	0	0	0	0
b0903	pflB pyruvate formate-lyase (inactive)	ND	0	ND	-2.24795	0	0	0	0	0	0	0	0	0	0	0	0	0
b0904	focA FocA formate FNT transporter	-2.21994	0	-2.6528	-4.17304	0	-2.40657	0	0	0	0	0	0	0	0	0	0	0
b0905	ycaO conserved hypothetical protein	0	0	0	0	0	0	0	0	0	0	0	0	0	0	0	0	0
b0906	ycaP conserved hypothetical protein	0	0	0	0	0	0	0	0	0	0	0	0	0	0	0	0	0
b0907	serC phosphohydroxythreonine aminotransferase / 3-phosphoserine aminotransferase	0	0	0	0	0	0	0	0	0	0	0	0	0	0	0	0	0
b0908	aroA 3-phosphoshikimate-1-carboxyvinyltransferase	0	0	0	0	0	0	0	0	0	0	0	0	0	0	0	0	0
b0909	ycaL putative heat shock protein	0	0	0	0	0	0	0	0	0	0	0	0	0	0	0	0	0
b0910	cmk cytidylate kinase	0	0	0	0	0	0	0	0	0	0	0	0	0	0	0	0	0
b0911	rpsA 30S ribosomal subunit protein S1	0	0	0	0	0	0	0	0	0	0	0	0	0	0	0	0	0
b0912	ihfB IHF transcriptional dual regulator	0	0	0	0	0	0	0	0	0	0	0	0	0	0	0	0	0
b0913	ycaI putative recombination protein with a metallo-hydrolase domain	0	ND	0	ND	0	0	0	0	0	0	0	0	0	0	0	0	ND
b0914	msbA ATP-binding transport protein	0	0	0	0	0	0	0	0	0	0	0	0	0	0	0	0	0
b0915	lpxK tetraacyldisaccharide 4'-kinase	0	0	0	0	0	0	0	0	0	0	0	0	0	0	0	0	0
b0916	ycaQ conserved protein	0	0	0	0	0	0	0	0	0	0	0	0	0	0	0	0	0
b0917	ycaR conserved protein	ND	ND	ND	0	0	0	0	0	0	0	0	0	0	0	0	0	0
b0918	kdsB 3-deoxy-D-manno-octulosonate cytidylyltransferase	0	0	0	0	0	0	0	0	0	0	0	0	0	0	0	0	0
b0919	ycbJ conserved hypothetical protein	0	0	0	0	0	0	0	0	0	0	0	0	0	0	0	0	0
b0920	ycbC conserved inner membrane protein	0	ND	0	ND	0	0	0	0	0	0	0	ND	0	0	0	0	ND
b0921	smtA predicted S-adenosylmethionine-dependent methyltransferase	0	0	0	0	0	0	0	0	0	0	0	0	0	0	0	0	0
b0922	mukF Ca 2+-binding protein involved in chromosome partitioning	0	0	0	0	0	0	0	0	0	0	0	0	0	0	0	0	0
b0923	mukE protein involved in chromosome partitioning	0	0	0	0	0	0	0	0	0	0	0	0	0	0	0	0	0
b0924	mukB cell division protein involved in chromosome partitioning	0	0	0	0	0	0	0	0	0	0	0	0	0	0	0	0	0
b0925	ycbB predicted carboxypeptidase/amidase	0	0	0	0	0	0	0	0	0	0	0	0	0	0	0	0	0
b0926	ycbK conserved protein	0	0	0	0	0	0	0	0	0	0	0	0	0	0	0	0	0
b0927	ycbL predicted metal-binding enzyme	0	0	0	0	0	0	0	0	0	0	0	0	0	0	0	0	0
b0928	aspC aspartate aminotransferase, PLP-dependent	0	0	0	0	0	0	0	1.51682	0	0	0	0	0	0	2.7528	0	0
b0929	ompF The Colicin A Import System	0	0	0	0	0	0	0	0	3.5519	0	0	0	0	0	0	0	0
b0930	asnS asparaginyl-tRNA synthetase	0	0	0	0	0	0	0	0	0	0	0	0	0	0	0	0	0
b0931	pncB nicotinate phosphoribosyltransferase	0	0	0	0	0	0	0	0	0	0	0	0	0	0	0	0	0
b0932	pepN aminopeptidase N	0	0	0	0	0	0	0	0	0	0	0	0	0	0	0	0	0
b0933	ssuB aliphatic sulfonate ABC transporter	0	0	0	0	0	0	0	0	0	0	0	0	0	0	0	0	0
b0934	ssuC aliphatic sulfonate ABC transporter	0	0	0	0	0	0	0	0	0	0	0	0	0	0	0	0	0
b0935	ssuD alkanesulfonate monooxygenase, FMNH 2 -dependent	0	0	0	0	0	0	0	0	0	0	0	0	0	0	0	0	0
b0936	ssuA aliphatic sulfonate ABC transporter	0	0	0	-2.53224	0	0	0	0	0	0	0	0	0	0	0	0	0
b0937	ssuE NAD(P)H-dependent FMN reductase monomer	0	0	0	0	0	0	0	0	0	0	0	0	0	0	0	0	0
b0939	ycbR predicted periplasmic pilin chaperone	0	0	0	-3.67659	0	0	0	0	0	0	0	0	0	0	0	0	0
b0940	ycbS predicted outer membrane usher protein	0	0	0	-2.52301	0	0	0	0	0	0	0	0	0	0	0	0	0
b0941	ycbT predicted fimbrial-like adhesin protein	0	0	0	0	0	0	0	0	0	0	0	0	0	0	0	0	0
b0942	ycbU predicted fimbrial-like adhesin protein	0	0	0	0	0	0	0	0	0	0	0	0	0	0	0	0	0
b0943	ycbV predicted fimbrial-like adhesin protein	0	0	ND	0	0	0	0	0	0	0	0	0	0	0	0	0	0
b0944	ycbF predicted periplasmic pilin chaperone	0	0	0	0	0	0	0	0	0	0	0	0	0	0	0	0	0
b0945	pyrD dihydroorotate oxidase	0	0	0	0	0	0	0	0	0	0	0	0	0	0	-3.79007	0	0
b0946	ycbW predicted protein	0	0	0	0	0	0	0	0	0	0	0	0	0	0	0	0	0
b0947	ycbX predicted 2Fe-2S cluster-containing protein	0	0	0	0	0	0	0	0	0	0	0	0	0	0	0	0	0
b0948	rlmL 23S rRNA m 2G2445 methyltransferase	0	0	0	0	0	0	0	0	0	0	0	0	0	0	0	0	0
b0949	uup ATP-binding protein with possible role in replication	0	0	0	0	0	0	0	0	0	0	0	0	0	0	0	0	0
b0950	pqiA paraquat-inducible protein A	0	0	0	0	0	0	0	0	0	0	0	0	0	0	0	0	0
b0951	pqiB paraquat-inducible protein B	0	0	0	0	0	0	0	0	0	0	0	0	0	0	0	0	0
b0952	ymbA conserved protein	0	0	0	0	0	0	0	0	0	0	0	0	0	0	0	0	0
b0953	rmf ribosome modulation factor	0	0	ND	0	0	0	0	0	0	0	0	0	0	0	0	0	0
b0954	fabA beta;-hydroxyacyl-ACP dehydrase [multifunctional]	0	0	0	0	0	0	0	0	0	0	0	0	0	0	0	0	0
b0955	ycbZ putative ATP-dependent protease	0	0	0	0	0	0	0	0	0	0	0	0	0	0	0	0	0
b0957	ompA outer membrane protein 3a (II*;G;d)	0	0	0	0	0	0	0	0	0	0	0	0	0	0	0	0	0
b0958	sulA SOS cell division inhibitor	0	ND	ND	0	0	0	0	0	0	0	0	0	0	0	0	0	0
b0959	sxy transcriptional coactivator for CRP	0	0	0	0	0	0	0	0	0	0	0	0	0	0	0	0	0
b0960	yccS hypothetical protein	0	0	0	0	0	0	0	0	0	0	0	0	0	0	0	0	0
b0961	yccF conserved hypothetical protein	0	0	0	0	0	0	0	0	0	0	0	0	0	0	0	0	0
b0962	helD DNA helicase IV	0	0	0	0	0	0	0	0	0	0	0	0	0	0	0	0	0
b0963	mgsA methylglyoxal synthase	0	0	0	0	0	0	0	0	0	0	0	0	0	0	0	0	0
b0964	yccT conserved protein	0	0	0	0	0	0	0	0	0	0	0	0	0	0	0	0	0
b0965	yccU predicted CoA-binding protein with NAD(P)-binding Rossmann-fold domain	0	0	0	0	0	0	0	0	0	0	0	0	0	0	0	0	0
b0966	hspQ heat shock protein, hemimethylated DNA-binding protein	0	0	0	0	0	0	0	0	0	0	0	0	0	0	0	0	0
b0967	yccW predicted methyltransferase	0	0	0	0	0	0	0	0	0	0	0	0	0	0	0	0	0
b0968	yccX acylphosphatase	0	0	0	0	0	0	0	0	0	0	0	0	0	0	0	0	0
b0969	tusE sulfur transfer protein	0	0	0	0	0	0	0	0	0	0	0	0	0	0	0	0	0
b0970	yccA putative carrier/transport protein; substrate or modulator of FtsH-mediated proteolysis	0	0	0	0	0	0	0	0	0	0	0	0	0	0	0	0	0
b0972	hyaA hydrogenase 1, small subunit	0	0	0	0	0	-2.96476	0	0	0	0	0	0	0	0	0	0	0
b0973	hyaB hydrogenase 1, large subunit	0	0	0	0	0	0	0	0	0	0	0	0	0	0	0	0	0
b0974	hyaC hydrogenase 1, b-type cytochrome subunit	0	0	0	0	0	0	0	0	0	0	0	0	0	0	0	0	0
b0975	hyaD protein involved in processing of HyaA and HyaB proteins	0	0	0	0	0	-3.0734	0	0	0	0	0	0	0	0	0	0	0
b0976	hyaE protein involved in processing of HyaA and HyaB proteins	0	0	0	0	0	0	0	0	0	0	0	0	0	0	0	0	0
b0977	hyaF protein involved in nickel incorporation into hydrogenase 1 proteins	0	0	0	0	0	0	0	0	0	0	0	0	0	0	0	0	0
b0978	appC cytochrome bd-II terminal oxidase subunit I	0	0	0	0	0	0	0	0	0	0	0	0	0	0	0	0	0
b0979	appB cytochrome bd-II terminal oxidase subunit II	0	0	0	0	0	0	0	0	0	0	0	0	0	0	0	0	0
b0980	appA acid phosphatase	0	0	0	0	0	0	0	0	0	0	0	0	0	0	0	0	0
b0981	etk autophosphorylating protein tyrosine kinase	0	0	0	0	0	0	0	0	0	0	0	0	0	0	0	2.22932	0
b0982	etp phosphotyrosine-protein phosphatase	0	0	0	0	0	0	0	0	0	0	0	0	0	0	0	0	0
b0983	gfcE predicted exopolysaccharide export protein	0	0	ND	0	0	0	0	0	0	0	0	0	0	0	0	0	0
b0984	gfcD putative lipoprotein	0	0	0	0	0	0	0	0	0	0	0	0	0	0	0	0	0
b0985	gfcC conserved protein	0	0	-2.2424	0	0	0	0	0	0	-2.31112	0	0	0	0	0	0	0
b0986	gfcB predicted outer membrane lipoprotein	0	0	0	-2.45596	0	0	0	0	0	0	0	0	0	0	0	0	0
b0987	gfcA predicted protein	0	0	0	0	0	0	0	0	0	0	0	0	0	0	0	0	0
b0989	cspH stress protein, member of the CspA family	0	0	0	0	0	0	0	0	0	0	0	0	0	0	0	0	0
b0991	ymcE YmcE	ND	ND	ND	0	0	0	0	0	0	0	0	0	0	0	0	0	0
b0992	yccM hypothetical protein	0	ND	0	ND	0	0	0	0	0	0	0	0	0	0	0	0	ND
b0993	torS TorS-P his850	0	0	0	0	0	0	0	0	0	0	0	0	0	0	0	0	0
b0994	torT TorT-TMAO	0	0	0	0	0	0	0	0	0	0	0	0	0	0	0	0	0
b0995	torR TorR transcriptional dual regulator	0	0	0	0	0	0	0	0	0	0	0	0	0	0	0	0	0
b0996	torC TorC trimethylamine N-oxide reductase, cytochrome c-type subunit	0	0	0	0	0	0	0	0	0	0	0	0	0	0	0	0	0
b0997	torA trimethylamine N-oxide reductase, catalytic subunit	0	0	0	0	0	0	0	0	0	0	0	0	0	0	0	0	0
b0998	torD chaperone protein for trimethylamine-N-oxide oxidoreductase I	0	0	0	0	0	0	0	0	0	0	0	0	0	0	0	0	0
b0999	cbpM chaperone-modulator protein CbpM	0	0	0	0	0	0	0	0	0	0	0	0	0	0	0	0	0
b1000	cbpA CbpA monomer	0	0	0	0	-1.65252	0	0	0	0	0	0	0	0	0	0	0	0
b1002	agp 3-phytase / glucose-1-phosphatase	0	0	0	0	0	0	0	0	0	0	0	0	0	0	0	0	0
b1003	yccJ predicted protein	0	0	0	0	0	0	0	0	0	0	0	0	0	0	0	0	0
b1004	wrbA WrbA monomer	0	0	0	0	0	0	0	0	0	0	0	0	0	0	0	0	0
b1005	ycdF	0	0	0	0	0	0	0	0	0	0	0	0	0	0	0	0	0
b1006	rutG predicted xanthine/uracil transporter	0	0	0	0	0	0	0	0	0	0	0	0	0	0	0	0	0
b1007	rutF predicted flavin reductase	0	0	0	0	0	0	0	0	0	0	0	0	0	0	0	0	0
b1008	rutE predicted nitroreductase	0	0	0	0	0	0	0	0	0	0	0	0	0	0	0	0	0
b1009	rutD alpha;/beta;-hydrolase	0	0	0	0	0	0	0	0	0	0	0	0	0	0	0	0	0
b1010	rutC predicted endoribonuclease	0	0	0	0	0	0	0	0	0	0	0	0	0	0	0	0	0
b1011	rutB predicted isochorismatase	0	0	0	0	0	0	0	0	0	0	0	0	0	0	0	0	0
b1012	rutA predicted coenzyme F 420 -dependent N 5,N 10-methylenetetrahydromethanopterin reductase	0	0	0	0	0	0	0	0	0	0	0	0	0	0	0	0	0
b1013	rutR predicted DNA-binding transcriptional regulator	0	0	0	0	0	0	0	0	0	0	0	0	0	0	0	0	0
b1015	putP PutP proline SSS transporter	0	0	0	0	0	0	0	0	0	0	0	0	0	0	0	0	0
b1016	efeU_1 hypothetical protein of the OFeT transport family	ND	ND	ND	0	0	0	0	0	0	0	0	0	0	0	0	0	0
b1017	b1017	0	0	0	0	0	0	0	0	0	0	0	0	0	0	0	0	0
b1018	efeO conserved protein	0	0	0	0	0	0	0	0	0	0	0	0	0	0	0	0	0
b1019	efeB heme-containing peroxidase	0	0	0	0	0	0	0	0	0	0	0	0	0	0	0	0	0
b1020	phoH ATP-binding protein	0	0	0	0	0	0	0	0	0	0	0	0	0	0	0	0	0
b1021	pgaD predicted inner membrane protein	0	0	0	-2.49511	0	0	0	0	0	0	0	0	0	0	0	0	0
b1022	pgaC predicted N-glycosyltransferase	0	0	0	-3.31296	0	0	0	0	0	0	0	0	0	0	0	0	0
b1023	pgaB predicted enzyme associated with biofilm formation	0	0	0	0	0	0	0	0	0	0	0	0	0	0	0	0	0
b1024	pgaA predicted outer membrane protein	0	0	0	-5.21352	0	0	0	0	0	0	0	0	0	0	0	0	0
b1025	ycdT predicted diguanylate cyclase	0	0	0	0	0	0	0	0	0	0	0	0	0	0	0	0	0
b1026	insF-4 IS3 element protein InsF	0	0	0	-4.182	0	0	0	0	0	0	0	0	0	0	0	0	0
b1027	insE-4 IS3 element protein InsE	0	0	0	-2.68692	0	0	0	0	0	0	0	0	0	0	0	0	0
b1028	ymdE putative malonyl-CoA:Acyl carrier protein transacylase	ND	ND	ND	0	0	0	0	0	0	0	0	0	0	0	0	0	0
b1029	ycdU predicted inner membrane protein	0	0	0	-2.64825	0	0	0	0	0	0	0	0	0	0	0	0	0
b1030	b1030	0	0	0	0	0	0	0	0	0	0	0	0	0	0	0	0	0
b1033	ghrA glyoxylate reductase	0	0	0	0	0	0	0	0	0	0	0	0	0	0	0	0	0
b1034	ycdX predicted zinc-binding hydrolase	0	0	0	0	0	0	0	0	0	0	0	0	0	0	0	0	0
b1035	ycdY putative oxidoreductase component	0	0	0	0	0	0	0	0	0	0	0	0	0	0	0	0	0
b1036	ycdZ putative transport protein	0	0	0	0	0	0	0	0	0	0	0	0	0	0	0	0	0
b1037	csgG curli production component	0	0	0	-2.75598	0	0	0	0	0	0	0	0	0	0	0	0	0
b1038	csgF curli assembly component	ND	0	ND	0	0	0	0	0	0	0	0	0	0	0	0	0	0
b1039	csgE curli production assembly/transport component	0	ND	ND	0	0	0	0	0	0	0	0	0	0	0	0	0	0
b1040	csgD CsgD transcriptional dual regulator	0	0	0	0	0	0	0	0	0	0	0	0	0	0	0	0	0
b1041	csgB curlin, minor subunit precursor	0	0	0	0	0	0	0	0	0	0	0	0	0	0	0	0	0
b1042	csgA curlin, major subunit	0	0	0	-4.91771	0	0	0	0	0	0	0	0	0	0	0	0	0
b1043	csgC putative curli production protein	ND	0	0	0	0	0	0	0	0	0	0	0	0	0	0	0	0
b1044	ymdA predicted protein	ND	0	0	0	-1.70926	0	0	0	0	0	0	0	0	0	0	0	0
b1045	ymdB putative polyprotein	-2.55526	0	0	0	-2.75738	0	0	0	0	0	0	0	0	0	0	0	0
b1046	ymdC predicted hydrolase	0	0	0	0	0	0	0	0	0	0	0	0	0	0	0	0	0
b1047	mdoC protein required for succinyl modification of osmoregulated periplasmic glucans	0	0	0	0	0	0	0	0	0	0	0	0	0	0	0	0	0
b1048	mdoG periplasmic glucan (MDO) biosynthesis protein	-2.47088	0	0	0	3.57711	0	0	3.01581	0	3.11082	3.82726	0	0	1.97906	3.96273	0	0
b1049	mdoH membrane glycosyltransferase; synthesis of membrane-derived oligosaccharide (MDO)	-2.35012	0	0	0	2.90229	0	0	2.45329	0	2.62003	3.8601	0	0	1.59815	2.943	0	0
b1050	yceK predicted lipoprotein	ND	ND	ND	0	0	0	0	0	0	0	0	0	0	0	0	0	0
b1051	msyB acidic protein that suppresses mutants lacking function of protein export	0	0	0	0	0	0	0	0	0	0	0	0	0	0	0	0	0
b1052	b1052	0	ND	0	ND	0	0	0	0	0	0	0	ND	0	0	0	0	ND
b1053	mdtG YceE drug MFS transporter	0	0	0	0	0	0	0	0	0	0	0	0	0	0	0	0	0
b1054	lpxL lauroyl acyltransferase	0	0	0	0	0	0	0	0	0	0	0	0	0	0	0	0	0
b1055	yceA conserved protein	0	0	0	0	0	0	0	0	0	0	0	0	0	0	0	0	0
b1056	yceI predicted protein	0	0	0	-2.6576	0	0	0	0	0	0	0	0	0	0	0	0	0
b1057	yceJ predicted cytochrome b561	0	0	0	-2.65076	0	0	0	0	0	0	0	0	0	0	0	0	0
b1058	yceO predicted protein	ND	ND	ND	0	0	0	0	0	0	ND	0	0	0	0	0	0	0
b1059	solA N-methyltryptophan oxidase	0	0	0	0	0	0	0	0	0	0	0	0	0	0	0	0	0
b1060	bssS regulator of biofilm formation	0	0	0	0	0	0	0	0	0	0	0	0	0	0	0	0	0
b1061	dinI DNA damage-inducible protein I	0	0	0	0	-2.31506	0	0	0	0	0	0	0	0	0	0	0	0
b1062	pyrC dihydroorotase	0	0	0	0	0	0	0	0	0	0	0	0	0	0	0	0	0
b1063	yceB predicted lipoprotein	0	0	0	0	0	0	0	0	0	0	0	0	0	0	0	0	0
b1064	grxB oxidized glutaredoxin 2	0	0	0	0	0	0	0	0	0	0	0	0	0	0	0	0	0
b1065	mdtH YceL MFS transporter	0	0	0	0	0	0	0	0	0	0	0	0	0	0	0	0	0
b1066	rimJ ribosomal-protein-S5-alanine N-acetyltransferase	0	0	0	0	0	0	0	0	0	0	0	0	0	0	0	0	0
b1067	yceH conserved protein	0	0	0	0	0	0	0	0	0	0	0	0	0	0	0	0	0
b1068	yceM predicted oxidoreductase, NAD(P)-binding Rossmann-fold domain	0	0	0	0	0	0	0	0	0	0	0	0	0	0	0	0	0
b1069	yceN predicted inner membrane protein	0	0	0	0	0	0	0	0	0	0	0	0	0	0	0	0	0
b1070	flgN flagellar biosynthesis protein FlgN	0	0	0	0	0	0	0	0	0	0	0	0	0	0	0	0	0
b1071	flgM anti-sigma factor for FliA (sigma 28)	0	0	0	0	0	0	0	0	0	0	2.16389	0	0	0	0	0	0
b1072	flgA flagellar biosynthesis; assembly of basal-body periplasmic P ring	0	0	0	0	0	0	0	0	0	0	0	0	0	0	0	0	0
b1073	flgB flagellar basal-body rod protein FlgB	0	0	ND	0	0	0	0	0	0	0	0	0	0	0	0	0	0
b1074	flgC flagellar basal-body rod protein FlgC	0	0	0	0	0	-2.95462	0	0	0	0	3.1959	0	0	0	2.47113	0	0
b1075	flgD flagellar biosynthesis, initiation of hook assembly	0	0	0	0	0	-5.24704	0	0	0	0	2.75721	0	0	0	0	0	0
b1076	flgE flagellar hook protein FlgE	0	0	0	0	0	0	0	0	0	0	3.04314	0	0	0	0	0	0
b1077	flgF flagellar basal-body rod protein FlgF	0	0	0	0	0	0	0	0	0	0	3.19134	0	0	0	0	0	0
b1078	flgG flagellar basal-body rod protein FlgG	0	0	0	0	0	0	0	0	0	0	2.28431	0	0	2.56652	0	0	0
b1079	flgH flagellar L-ring protein FlgH; basal-body outer-membrane L (lipopolysaccharide layer) ring protein	0	0	0	0	0	0	0	0	0	0	0	0	0	0	0	0	0
b1080	flgI flagellar P-ring protein FlgI	0	0	0	0	0	0	0	0	0	0	0	0	0	0	0	0	0
b1081	flgJ FlgJ	0	0	0	0	0	0	0	0	0	0	2.5009	0	0	0	2.4053	0	0
b1082	flgK flagellar biosynthesis, hook-filament junction protein 1	0	0	0	0	0	0	0	0	0	0	0	0	0	0	0	0	0
b1083	flgL flagellar biosynthesis; hook-filament junction protein	0	0	0	0	0	0	0	0	0	0	0	0	0	0	0	0	0
b1084	rne degradosome	0	0	0	0	0	0	0	0	0	0	0	0	0	0	0	0	0
b1085	yceQ predicted protein	0	0	0	0	0	0	0	0	0	0	0	0	0	0	0	0	0
b1086	rluC 23S rRNA pseudouridine synthase	0	0	0	0	0	0	0	0	0	0	0	0	0	0	0	0	0
b1087	yceF predicted nucleotide-binding protein	0	0	0	0	0	0	0	0	0	0	0	0	0	0	0	0	0
b1088	yceD conserved protein	0	ND	ND	0	0	0	0	0	0	0	0	0	0	0	0	0	0
b1089	rpmF 50S ribosomal subunit protein L32	ND	0	ND	0	0	0	0	0	0	0	0	0	0	0	0	0	0
b1090	plsX fatty acid/phospholipid synthesis protein	0	0	0	0	0	0	0	0	0	0	0	0	0	0	0	0	0
b1091	fabH beta;-ketoacyl-ACP synthase / acetyl-CoA:ACP transacylase	0	0	0	0	0	0	0	0	0	0	0	0	0	0	0	0	0
b1092	fabD malonyl-CoA-ACP transacylase	0	0	0	0	0	0	0	0	0	0	0	0	0	0	0	0	0
b1093	fabG beta;-ketoacyl-[acyl-carrier-protein] reductase	0	0	0	0	0	0	0	0	0	0	0	0	0	0	0	0	0
b1094	acpP lipoyl-ACP	ND	0	0	0	0	0	0	0	0	0	0	0	0	0	0	0	0
b1095	fabF beta;-ketoacyl-ACP synthase	0	0	0	0	0	0	0	0	0	0	0	0	0	0	0	0	0
b1096	pabC para-aminobenzoate synthase multi-enzyme complex	0	0	0	0	0	0	0	0	0	0	0	0	0	0	0	0	0
b1097	yceG predicted aminodeoxychorismate lyase	0	0	0	0	0	0	0	0	0	0	0	0	0	0	0	0	0
b1098	tmk dTMP kinase	0	0	0	0	0	0	0	0	0	0	0	0	0	0	0	0	0
b1099	holB DNA polymerase III, delta; prime subunit	0	0	0	0	0	0	0	0	0	0	0	0	0	0	0	0	0
b1100	ycfH predicted metallodependent hydrolase	0	0	0	0	0	0	0	0	0	0	0	0	0	0	0	0	0
b1101	ptsG enzyme II glc	0	0	0	0	0	0	0	0	0	0	0	0	0	0	0	0	0
b1102	fhuE outer membrane receptor for ferric iron uptake	0	0	0	0	0	0	0	0	0	0	0	0	0	0	0	0	0
b1103	hinT purine nucleoside phosphoramidase	ND	0	ND	0	0	0	0	0	0	0	0	0	0	0	0	0	0
b1104	ycfL putative lipoprotein	ND	ND	ND	0	0	0	0	0	0	0	0	0	0	0	0	0	0
b1105	ycfM predicted protein	0	0	0	0	0	0	0	0	0	0	0	0	0	0	0	0	0
b1106	thiK thiamin kinase	0	0	0	0	0	0	0	0	0	0	0	0	0	0	0	0	0
b1107	nagZ beta;-N-acetylglucosaminidase	0	0	0	0	0	0	0	0	0	0	0	0	0	0	0	0	0
b1108	ycfP conserved protein	0	0	0	0	0	0	0	0	0	0	0	0	0	0	0	0	0
b1109	ndh NADH dehydrogenase II	8.50092	6.56529	9.93908	6.63773	0	0	0	0	0	0	0	0	0	0	0	0	0
b1110	ycfJ hypothetical protein	0	0	0	0	0	0	0	0	0	0	0	0	0	0	0	0	0
b1111	ycfQ predicted DNA-binding transcriptional regulator	0	0	0	0	0	0	0	0	0	0	0	0	0	0	0	0	0
b1112	bhsA protein involved in stress resistance and biofilm formation	0	0	0	0	0	0	0	0	0	0	0	0	0	0	0	0	0
b1113	ycfS conserved protein	0	0	0	0	0	0	0	0	0	0	0	0	0	0	0	0	0
b1115	ycfT putative transport protein	0	0	-2.1505	0	0	0	0	0	0	0	0	0	0	0	0	0	0
b1116	lolC LolCDE ABC lipoprotein transporter	0	0	0	0	0	0	0	0	0	0	0	0	0	0	0	0	0
b1117	lolD LolCDE ABC lipoprotein transporter	0	0	0	0	0	0	0	0	0	0	0	0	0	0	0	0	0
b1118	lolE LolCDE ABC lipoprotein transporter	0	0	0	0	0	0	0	0	0	0	0	0	0	0	0	0	0
b1119	nagK N-acetyl-D-glucosamine kinase	0	0	0	0	0	0	0	0	0	0	0	0	0	0	0	0	0
b1120	cobB protein deacetylase, Sir2 homolog	0	0	0	0	0	0	0	0	0	0	0	0	0	0	0	0	0
b1121	ycfZ predicted inner membrane protein	0	0	0	0	0	0	0	0	0	0	0	0	0	0	0	0	0
b1122	ymfA predicted inner membrane protein	0	0	0	0	0	0	0	0	0	0	0	0	0	0	0	0	0
b1123	potD putrescine/spermidine ABC transporter	0	6.60728	0	6.34069	0	0	0	0	0	0	0	0	0	0	0	0	0
b1124	potC putrescine/spermidine ABC transporter	0	0	0	0	0	0	0	0	0	0	0	0	0	0	0	0	0
b1125	potB putrescine/spermidine ABC transporter	0	2.77432	0	2.85337	0	0	0	0	0	0	0	0	0	0	0	0	0
b1126	potA putrescine/spermidine ABC transporter	0	3.74581	0	3.92397	0	0	0	0	0	0	0	0	0	0	0	0	0
b1127	pepT peptidase T	0	0	0	0	0	-2.20528	0	0	0	0	0	0	0	0	0	0	0
b1128	ycfD conserved protein	0	0	0	0	0	0	0	0	0	0	0	0	0	0	0	0	0
b1129	phoQ PhoQ-P his	0	0	0	0	0	0	0	0	0	0	0	0	0	0	0	0	0
b1130	phoP PhoP-Phosphorylated transcriptional dual regulator	0	0	ND	0	-3.38101	-2.36497	0	-2.7011	-2.90239	0	-2.66613	0	0	-1.83557	-3.53171	-3.28744	0
b1131	purB 5'-phosphoribosyl-4-(N-succinocarboxamide)-5-aminoimidazole lyase [multifunctional]	0	0	0	0	0	0	0	0	0	0	0	0	0	0	0	0	0
b1132	hflD predicted lysogenization regulator	0	0	0	0	0	0	0	0	0	0	0	0	0	0	0	0	0
b1133	mnmA tRNA (5-methylaminomethyl-2-thiouridylate)-methyltransferase	0	0	0	0	0	0	0	0	0	0	0	0	0	0	0	0	0
b1134	nudJ HMP-PP hydrolase / thiamin pyrophosphate hydrolase	0	0	0	0	0	0	0	0	0	0	0	0	0	0	0	0	0
b1135	rluE 23S rRNA pseudouridine synthase	0	0	0	0	0	0	0	0	0	0	0	0	0	0	0	0	0
b1136	icd isocitrate dehydrogenase	0	0	0	0	0	0	0	0	0	0	0	0	0	0	0	0	0
b1137	ymfD e14 prophage; predicted SAM-dependent methyltransferase	ND	0	0	0	0	0	0	0	0	0	0	0	0	0	0	0	0
b1139	lit Lit, cell death peptidase; phage exclusion; e14 prophage	ND	ND	ND	0	0	0	0	0	0	0	0	0	0	0	0	0	0
b1140	intE e14 prophage; predicted integrase	0	0	0	-3.06698	0	0	0	0	0	0	0	0	0	0	0	0	0
b1141	xisE e14 prophage; predicted excisionase	0	0	0	0	0	0	0	0	0	0	0	0	0	0	0	0	0
b1142	ymfH e14 prophage; predicted protein	0	0	0	0	0	0	0	0	0	0	0	0	0	0	0	0	0
b1143	ymfI e14 prophage; predicted protein	0	0	0	0	0	0	0	0	0	0	0	0	0	0	0	0	0
b1144	ymfJ e14 prophage; predicted protein	ND	0	0	0	0	0	0	0	0	0	0	0	0	0	0	0	0
b1145	ymfK e14 prophage; predicted repressor protein	ND	0	ND	0	0	0	0	0	0	0	0	0	0	0	0	0	0
b1146	ymfT e14 prophage; predicted DNA-binding transcriptional regulator	0	0	ND	0	0	0	0	0	0	0	0	0	0	0	0	0	0
b1147	ymfL e14 prophage; predicted DNA-binding transcriptional regulator	0	0	0	0	0	0	0	0	0	0	0	0	0	0	0	0	0
b1148	ymfM e14 prophage; predicted protein	0	0	0	0	0	0	0	0	0	0	0	0	0	0	0	0	0
b1149	ymfN e14 prophage; predicted DNA-binding transcriptional regulator	0	0	0	0	0	0	0	0	0	0	0	0	0	0	0	0	0
b1151	ymfO e14 prophage; conserved protein	ND	0	0	0	0	0	0	0	0	0	0	0	0	0	0	0	0
b1152	ymfP e14 prophage; conserved protein	0	0	0	0	0	0	0	0	0	0	0	0	0	0	0	0	0
b1153	ymfQ e14 prophage; conserved protein	ND	0	0	0	0	0	0	0	0	0	0	0	0	0	0	0	0
b1154	ycfK e14 prophage; predicted protein	0	0	0	0	0	0	0	0	0	0	0	0	0	0	0	0	0
b1155	ymfS e14 prophage; predicted protein	ND	ND	0	0	0	0	0	0	0	0	0	0	0	0	0	0	0
b1156	tfaE e14 prophage; predicted tail fiber assembly protein	0	0	0	-4.95173	0	0	0	0	0	0	0	0	0	0	0	0	0
b1157	stfE e14 prophage; predicted side tail fiber protein fragment	0	0	0	0	0	0	0	0	0	0	0	0	0	0	0	0	0
b1158	pinE e14 prophage; site-specific DNA recombinase	ND	0	0	0	0	0	0	0	0	0	0	0	0	0	0	0	0
b1160	elbA predicted protein	ND	0	ND	0	0	0	0	0	0	0	0	0	0	0	0	0	0
b1162	ycgE predicted DNA-binding transcriptional regulator	0	0	0	0	0	0	0	0	0	0	0	0	0	0	0	0	0
b1163	ycgF predicted FAD-binding phosphodiesterase	0	0	0	-3.76558	0	0	0	0	0	0	0	0	0	0	0	0	0
b1164	ycgZ predicted protein	0	0	0	0	0	0	0	0	0	0	0	0	0	0	0	0	0
b1166	ariR regulator of acid resistance, influenced by indole	ND	ND	ND	ND	0	ND	0	0	0	ND	0	0	ND	0	0	0	0
b1167	ymgC protein involved in biofilm formation	ND	ND	ND	0	0	0	0	0	0	0	0	0	ND	0	0	0	0
b1168	ycgG conserved inner membrane protein	0	0	0	0	0	0	0	0	0	0	0	0	0	0	0	0	0
b1169	b1169	ND	0	ND	0	0	0	0	0	0	ND	0	0	0	0	0	0	0
b1170	b1170	0	0	0	-3.80443	0	0	0	0	0	0	0	0	0	0	0	0	0
b1171	ymgD predicted protein	0	0	0	0	0	0	0	0	0	0	0	0	0	0	0	0	0
b1172	ymgG predicted protein	0	0	0	0	0	0	0	0	0	0	0	0	0	0	0	0	0
b1173	ycgI predicted protein	0	0	0	0	0	0	0	0	0	0	0	0	0	0	0	0	0
b1174	minE cell division topological specificity factor and inhibitory component of the MinC-MinD-MinE system that regulates septum placement	0	0	ND	0	0	0	0	0	0	0	0	0	0	0	0	0	ND
b1175	minD membrane ATPase of the MinC-MinD-MinE system that regulates septum placement	0	0	0	0	0	0	0	0	0	0	0	0	0	0	0	0	0
b1176	minC cell division inhibitor of the MinC-MinD-MinE and DicB-MinC systems that regulate septum placement	0	0	ND	0	0	0	0	0	0	0	0	0	0	0	0	0	0
b1179	ycgL conserved protein	ND	ND	0	0	0	0	0	0	0	0	0	0	0	0	0	0	0
b1180	ycgM predicted isomerase/hydrolase	0	0	0	0	0	0	0	0	0	0	0	0	0	0	0	0	0
b1181	ycgN conserved protein	0	0	0	0	0	0	0	0	0	0	0	0	0	0	0	0	0
b1182	hlyE hemolysin E	0	0	0	0	0	0	0	0	0	0	0	0	0	0	0	0	0
b1183	umuD SOS mutagenesis; error-prone repair; processed to UmuD'; forms complex with UmuC	0	0	ND	0	0	0	0	0	0	0	0	0	0	0	0	0	0
b1184	umuC SOS mutagenesis and repair	0	0	0	0	0	0	0	0	0	0	0	0	0	0	0	0	0
b1185	dsbB oxidoreductase that catalyzes reoxidation of DsbA protein disulfide isomerase I	0	0	0	0	0	0	0	0	0	0	0	0	0	0	0	0	0
b1186	nhaB NhaB sodium/proton transporter	0	0	0	0	0	0	0	0	0	0	0	0	0	0	0	0	0
b1187	fadR FadR transcriptional dual regulator	3.09893	2.4651	0	0	0	0	0	0	0	0	0	0	0	0	0	0	0
b1188	ycgB putative sporulation protein	0	0	0	0	0	0	0	0	0	0	0	0	0	0	0	0	0
b1189	dadA D-amino acid dehydrogenase, small subunit	0	0	0	0	0	0	0	0	0	0	0	0	0	0	0	0	0
b1190	dadX alanine racemase 2, PLP-binding	0	0	0	0	0	0	0	0	0	0	0	0	0	0	0	0	0
b1192	ldcA L,D-carboxypeptidase A	0	0	0	0	0	0	0	0	0	0	0	0	0	0	0	0	0
b1193	emtA lytic murein transglycosylase E	0	0	0	0	0	0	0	0	0	0	0	0	0	0	0	0	0
b1195	ymgE transglycosylase associated protein	0	0	0	0	0	0	0	0	0	0	0	0	0	0	0	0	0
b1196	ycgY predicted protein	0	0	0	0	0	0	0	0	0	0	0	0	0	0	0	0	0
b1197	treA trehalase, periplasmic	0	0	0	-3.81463	-1.67499	0	0	0	0	0	0	0	0	0	0	0	0
b1198	dhaM dihydroxyacetone kinase subunit M	0	0	0	0	0	0	0	0	0	0	0	0	0	0	0	0	0
b1199	dhaL dihydroxyacetone kinase subunit L	0	0	0	0	0	0	0	0	0	0	0	0	0	0	0	0	0
b1200	dhaK dihydroxyacetone kinase subunit K	0	0	0	0	0	0	0	0	0	0	0	0	0	0	0	0	0
b1201	dhaR DhaR transcriptional dual regulator	0	0	0	0	0	0	0	0	0	0	0	0	0	0	-2.40705	0	0
b1202	ycgV putative adhesion and penetration protein	ND	ND	ND	0	0	0	0	0	0	0	0	0	0	0	0	0	0
b1203	ychF putative GTP-binding protein	0	0	0	0	0	0	0	0	0	0	0	0	0	0	0	0	0
b1204	pth peptidyl-tRNA hydrolase	0	0	0	0	0	0	0	0	0	0	0	0	0	0	0	0	0
b1205	ychH predicted inner membrane protein	0	0	0	0	0	0	0	0	0	0	0	0	2.17931	0	0	0	0
b1206	ychM YchM sulfate SulP transporter	0	0	0	0	0	0	0	0	0	0	0	0	0	0	0	0	0
b1207	prs ribose-phosphate diphosphokinase	0	0	0	0	0	0	0	0	0	0	0	0	0	0	0	0	0
b1208	ispE 4-diphosphocytidyl-2-C-methylerythritol kinase	0	0	0	0	0	0	0	0	0	0	0	0	0	0	0	0	0
b1209	lolB outer membrane lipoprotein, localization of lipoproteins in the outer membrane	0	0	0	0	0	0	0	0	0	0	0	0	0	0	0	0	0
b1210	hemA glutamyl-tRNA reductase	0	0	0	0	0	0	0	0	0	0	0	0	0	0	0	0	0
b1211	prfA peptide chain release factor RF1	0	0	0	0	0	0	0	0	0	0	0	0	0	0	0	0	0
b1212	prmC protein-(glutamine-N5) methyltransferase	0	0	0	0	0	0	0	0	0	0	0	0	0	0	0	0	0
b1213	ychQ predicted transcriptional regulator	0	0	0	0	0	0	0	0	0	0	0	0	0	0	0	0	0
b1214	ychA predicted transcriptional regulator	0	0	0	0	0	0	0	0	0	0	0	0	0	0	0	0	0
b1215	kdsA 3-deoxy-D-manno-octulosonate 8-phosphate synthase	0	0	0	0	0	0	0	0	0	0	0	0	0	0	0	0	0
b1216	chaA ChaA calcium CaCA transporter	0	0	0	0	0	0	0	0	0	0	0	0	0	0	0	0	0
b1217	chaB predicted cation transport regulator	ND	ND	ND	0	0	ND	0	0	0	0	0	0	0	0	0	0	0
b1218	chaC predicted cation transport protein	0	0	0	0	0	0	0	0	0	0	0	0	0	0	0	0	0
b1219	ychN conserved protein	0	0	0	0	0	0	0	0	0	0	0	0	0	0	0	0	0
b1220	ychO predicted invasin	0	0	0	-2.56216	0	0	0	0	0	0	0	0	0	0	0	0	0
b1221	narL NarL-Phosphorylated transcriptional dual regulator	0	0	0	0	0	0	0	0	0	0	0	0	0	0	0	0	0
b1222	narX NarX-P his	0	0	0	0	0	0	0	0	0	0	0	0	0	0	0	0	0
b1223	narK NarK MFS nitrate/nitrite antiporter	0	0	0	0	0	0	0	0	0	0	0	0	0	0	0	0	0
b1225	narH nitrate reductase A, beta; subunit	0	0	0	0	0	0	0	0	0	0	0	0	0	0	0	0	0
b1226	narJ molybdenum cofactor assembly chaperone subunit (delta; subunit) of nitrate reductase 1	0	0	0	0	0	0	0	0	0	0	0	0	0	0	0	0	0
b1227	narI nitrate reductase A, gamma; subunit	0	0	0	0	0	0	0	0	0	0	0	0	0	0	0	0	0
b1228	ychS predicted protein	0	0	0	0	0	0	0	0	0	0	0	0	0	0	0	0	0
b1229	tpr predicted protamine-like protein	0	0	ND	0	0	0	0	0	0	0	0	0	0	0	0	0	0
b1232	purU formyltetrahydrofolate deformylase	0	0	0	0	0	0	0	0	0	0	0	0	0	0	0	0	0
b1233	ychJ conserved protein	0	0	0	0	0	0	0	0	0	0	0	0	0	0	0	0	0
b1235	rssB RssB-P	-3.07703	-2.44594	-2.69672	-3.51692	-1.76459	0	0	0	0	0	0	0	0	0	0	0	0
b1236	galU glucose-1-phosphate uridylyltransferase	0	0	0	0	0	0	0	0	0	0	0	0	0	0	0	0	0
b1237	hns H-NS transcriptional dual regulator	0	0	0	0	0	0	0	0	0	0	0	0	0	0	0	0	0
b1238	tdk thymidine kinase / deoxyuridine kinase	0	0	0	0	0	0	0	0	0	0	0	0	0	0	0	0	0
b1239	ychG	0	0	0	0	0	0	0	0	0	0	0	0	0	0	0	0	0
b1240	b1240	0	0	0	0	0	0	0	0	0	0	0	0	0	0	0	0	0
b1241	adhE PFL-deactivase / alcohol dehydrogenase / acetaldehyde dehydrogenase	0	0	0	0	0	0	0	0	0	0	0	0	0	0	0	0	0
b1242	ychE putative channel protein	0	0	0	0	0	0	0	0	0	0	0	0	0	0	0	0	0
b1243	oppA OppA-oligopeptide ABC transporter substrate-binding	0	0	0	0	0	0	0	0	0	0	0	0	0	0	0	0	0
b1244	oppB Murein Tripeptide ABC Transporter	0	0	0	0	0	0	0	0	0	0	0	0	0	0	0	0	0
b1245	oppC Murein Tripeptide ABC Transporter	0	0	0	0	0	0	0	0	0	0	0	0	0	0	0	0	0
b1246	oppD Murein Tripeptide ABC Transporter	0	0	0	0	0	0	0	0	0	0	0	0	0	0	0	0	0
b1247	oppF Murein Tripeptide ABC Transporter	0	0	0	0	0	0	0	0	0	0	0	0	0	0	0	0	0
b1248	yciU predicted protein	0	ND	0	ND	-1.73576	0	0	0	0	0	0	ND	0	0	0	0	ND
b1249	cls cardiolipin synthase	0	0	0	0	-1.64364	0	0	0	0	0	0	0	0	0	0	0	0
b1251	yciI predicted enzyme	0	0	0	0	0	0	0	0	0	0	0	0	0	0	0	0	0
b1253	yciA esterase	0	0	0	0	0	0	0	0	0	0	0	0	0	0	0	0	0
b1254	yciB predicted inner membrane protein	0	0	0	0	0	0	0	0	0	0	0	0	0	0	0	0	0
b1255	yciC predicted inner membrane protein	0	0	0	0	0	0	0	0	0	0	0	0	0	0	0	0	0
b1256	ompW OmpW, outer membrane protein	0	0	0	-4.77537	0	0	0	0	0	0	0	0	0	0	0	0	0
b1257	yciE conserved protein	0	0	ND	0	0	0	0	0	0	0	0	0	0	0	0	0	0
b1258	yciF putative structural protein	ND	ND	ND	0	0	0	0	0	0	0	0	0	0	0	0	0	0
b1259	yciG predicted protein	0	0	0	0	0	0	0	0	0	0	0	0	0	0	0	0	0
b1260	trpA tryptophan synthase, alpha; subunit	6.17568	0	4.22528	0	0	0	0	0	0	0	0	0	0	0	0	0	0
b1261	trpB tryptophan synthase, beta; subunit	4.54579	0	4.00215	0	0	0	0	0	0	0	0	0	0	0	0	0	0
b1262	trpC indole-3-glycerol phosphate synthase / phosphoribosylanthranilate isomerase	8.89849	0	6.59596	0	0	0	0	0	0	0	0	0	0	0	0	0	0
b1263	trpD anthranilate synthase component II	6.97358	0	6.09027	0	0	0	0	0	0	0	0	0	0	0	0	0	0
b1264	trpE anthranilate synthase component I	5.6465	0	4.60213	0	0	0	0	0	0	0	0	0	0	0	0	0	0
b1266	trpH conserved protein	0	0	0	0	0	0	0	0	0	0	0	0	0	0	0	0	0
b1267	yciO conserved protein	0	0	0	0	0	0	0	0	0	0	0	0	0	0	0	0	0
b1268	yciQ predicted inner membrane protein	0	0	0	-2.20688	0	0	0	0	0	0	0	0	0	0	0	0	0
b1269	rluB 23S rRNA pseudouridine synthase	0	0	0	0	0	0	0	0	0	0	0	0	0	0	0	0	0
b1271	yciK predicted oxidoreductase	0	0	0	0	0	0	0	0	0	0	0	0	0	0	0	0	0
b1272	sohB predicted inner membrane peptidase	0	0	0	-2.39182	0	0	0	0	0	0	0	0	0	0	0	0	0
b1273	yciN predicted protein	0	0	0	0	0	0	0	0	0	0	0	0	0	0	0	0	0
b1274	topA DNA topoisomerase I	0	2.37018	0	0	0	0	0	0	0	0	0	0	0	0	0	0	0
b1275	cysB CysB-O-acetyl-L-serine	7.39937	6.66839	4.44411	4.54403	0	0	0	0	0	0	0	0	0	0	0	0	0
b1276	acnA aconitase	0	0	0	0	0	0	0	0	0	0	0	0	0	0	0	0	0
b1277	ribA GTP cyclohydrolase II	0	0	0	0	0	0	0	0	0	0	0	0	0	0	0	0	0
b1278	pgpB undecaprenyl pyrophosphate phosphatase [multifunctional]	0	0	0	0	0	0	0	0	0	0	0	0	0	0	0	0	0
b1279	yciS conserved inner membrane protein	0	0	0	0	0	0	0	0	0	0	0	0	0	0	0	0	0
b1280	yciM putative heat shock protein	0	0	0	0	0	0	0	0	0	0	0	0	0	0	0	0	0
b1281	pyrF orotidine-5'-phosphate-decarboxylase	0	0	0	0	0	0	0	0	0	0	0	0	0	0	0	0	0
b1283	osmB OsmB osmotically inducible lipoprotein	0	0	ND	0	0	0	0	0	0	0	0	0	0	0	0	0	0
b1284	deoT DNA-binding transcriptional regulator	0	0	0	0	0	0	0	0	0	0	0	0	0	0	0	0	0
b1285	gmr modulator of RNase II stability	0	0	0	0	0	0	0	0	0	0	0	0	0	0	0	0	0
b1286	rnb ribonuclease II	0	0	0	0	0	0	0	0	0	0	0	0	0	0	0	2.60191	0
b1287	yciW predicted oxidoreductase	0	0	0	0	0	0	0	0	0	0	0	0	0	0	0	0	0
b1288	fabI enoyl-ACP reductase (NAD[P]H) [multifunctional]	0	0	0	0	0	0	0	0	0	0	0	0	0	0	0	0	0
b1289	ycjD conserved protein	0	0	0	0	1.50388	0	0	0	0	0	0	0	0	0	0	0	0
b1290	sapF peptide uptake ABC transporter	0	0	0	0	0	2.84897	0	3.0147	0	0	0	0	0	0	2.82309	0	0
b1291	sapD peptide uptake ABC transporter	0	0	0	0	0	4.22723	0	5.00234	3.0597	0	0	0	0	0	5.15261	0	0
b1292	sapC peptide uptake ABC transporter	0	0	0	0	0	0	0	0	0	0	0	0	0	0	2.70118	0	0
b1293	sapB peptide uptake ABC transporter	0	0	0	0	0	2.84402	0	1.91818	0	0	0	0	0	0	0	0	0
b1294	sapA peptide uptake ABC transporter	0	0	0	0	0	0	0	0	0	0	0	0	0	0	0	0	0
b1295	ymjA predicted protein	0	ND	0	ND	0	0	0	0	0	0	0	0	0	0	0	0	0
b1296	puuP putrescine importer	0	0	0	0	0	0	0	0	0	0	0	0	0	0	0	0	0
b1297	puuA gamma;-glutamylputrescine synthetase	0	0	0	0	0	0	0	0	0	0	0	0	0	0	0	0	0
b1298	puuD gamma;-glutamyl-gamma;-aminobutyrate hydrolase	2.79067	4.56674	0	0	0	0	0	0	0	0	0	0	0	0	0	0	0
b1299	puuR DNA-binding transcriptional repressor	3.9931	3.9684	0	0	0	0	0	0	0	0	0	0	0	0	0	0	0
b1300	puuC gamma;-glutamyl-gamma;-aminobutyraldehyde dehydrogenase	0	0	0	0	0	0	0	0	0	0	0	0	0	0	0	0	0
b1301	puuB gamma;-glutamylputrescine oxidase	0	0	0	0	0	0	0	0	0	0	0	0	0	0	0	0	0
b1303	pspF PspF transcriptional dual regulator	0	0	0	0	0	-2.18537	0	0	0	0	0	0	0	0	0	0	0
b1304	pspA regulatory protein for the phage shock protein operon	0	0	0	0	0	0	0	0	0	0	0	0	0	0	0	0	0
b1305	pspB stimulates PspC-mediated transcriptional activation of the psp operon; antitoxin of a PspC-PspB toxin-antitoxin pair	0	ND	ND	0	0	0	0	0	0	0	0	0	0	0	0	0	0
b1306	pspC PspC transcriptional regulator; toxin of a PspC-PspB toxin-antitoxin pair	0	ND	0	ND	0	0	0	0	0	0	0	ND	0	0	0	0	ND
b1307	pspD peripheral inner membrane phage-shock protein	0	ND	0	0	0	0	0	0	0	0	0	0	0	0	0	0	0
b1308	pspE thiosulfate sulfurtransferase	0	ND	0	0	0	0	0	0	0	0	0	0	0	0	0	0	0
b1309	ycjM predicted glucosyltransferase	0	0	0	-2.23712	0	0	0	0	0	0	0	0	0	0	0	0	0
b1310	ycjN YcjN/YcjO/YcjP ABC transporter	0	0	0	0	0	0	0	0	0	0	0	0	0	0	0	0	0
b1311	ycjO YcjN/YcjO/YcjP ABC transporter	0	0	0	0	0	0	0	0	0	0	0	0	0	0	0	0	0
b1312	ycjP YcjN/YcjO/YcjP ABC transporter	0	0	0	0	0	0	0	0	0	0	0	0	0	0	0	0	0
b1313	ycjQ predicted oxidoreductase, Zn-dependent and NAD(P)-binding	0	0	0	0	0	0	0	0	0	0	0	0	0	0	0	0	0
b1315	ycjS predicted oxidoreductase, NADH-binding	0	0	0	0	0	0	0	0	0	0	0	0	0	0	0	0	0
b1316	ycjT predicted hydrolase	0	0	0	0	0	0	0	0	0	0	0	0	0	0	0	0	0
b1317	ycjU beta;-phosphoglucomutase	0	0	0	0	0	0	0	0	0	0	0	0	0	0	0	0	0
b1318	ycjV predicted sugar transporter subunit: ATP-binding component of ABC superfamily	0	0	0	0	0	0	0	0	0	0	0	0	0	0	0	0	0
b1319	ompG outer membrane porin OmpG	0	0	0	-3.48265	0	0	0	0	0	0	0	0	0	0	0	0	0
b1320	ycjW putative LacI-type transcriptional regulator	0	0	0	-2.99397	0	0	0	0	0	0	0	0	0	0	0	0	0
b1321	ycjX conserved protein	0	0	0	0	0	0	0	0	0	0	0	0	0	0	0	0	0
b1322	ycjF putative membrane protein	0	0	0	0	0	0	0	0	0	0	0	0	0	0	0	0	0
b1323	tyrR TyrR transcriptional dual regulator	0	0	0	0	0	0	0	0	0	0	0	0	0	0	0	0	0
b1324	tpx thiol peroxidase 2	0	0	0	0	0	0	0	0	0	0	0	0	0	0	0	0	0
b1325	ycjG L-Ala-D/L-Glu epimerase	0	0	0	0	0	0	0	0	0	0	0	0	0	0	0	0	0
b1326	mpaA murein peptide amidase A	0	0	0	0	0	0	0	0	0	0	0	0	0	0	0	0	0
b1327	ycjY hypothetical protein	0	0	0	0	0	0	0	0	0	0	0	0	0	0	0	0	0
b1328	ycjZ putative transcriptional regulator LysR-type	0	0	0	-2.54269	0	0	0	0	0	0	0	0	0	0	0	0	0
b1329	mppA periplasmic murein tripeptide binding protein	0	0	0	-3.53729	0	0	0	0	0	0	0	0	0	0	0	0	0
b1330	ynaI conserved inner membrane protein	0	0	0	0	0	0	0	0	0	0	0	0	0	0	0	0	0
b1331	insH-4 IS5 transposase and trans-activator	0	0	0	-2.64017	0	0	0	0	0	0	0	0	0	0	0	0	0
b1332	ynaJ conserved hypothetical protein	0	0	ND	0	0	0	0	0	0	0	0	0	0	0	0	0	0
b1333	uspE universal stress protein with a role in resistance to UV irradiation	0	0	0	ND	0	0	0	0	-3.94444	0	0	0	0	0	0	0	0
b1334	fnr FNR transcriptional dual regulator	0	0	0	0	0	0	0	0	0	0	0	0	0	0	0	0	0
b1335	ogt Ogt	0	0	0	0	0	0	0	0	0	0	0	0	0	0	0	0	0
b1336	abgT AbgT Transporter	0	0	0	0	0	0	0	0	0	0	0	0	0	0	0	0	0
b1337	abgB putative p-aminobenzoyl-glutmate hydrolase	0	0	0	0	0	0	0	0	0	0	0	0	0	0	0	0	0
b1338	abgA protein with similarity to aminoacyl aminohydrolases	0	0	0	0	0	0	0	0	0	0	0	0	0	0	0	0	0
b1339	abgR putative transcriptional regulator LYSR-type	0	0	0	0	0	0	0	0	0	0	0	0	0	0	0	0	0
b1340	ydaL conserved protein	0	0	0	0	0	0	0	0	0	0	0	0	0	0	0	0	0
b1341	ydaM diguanylate cyclase, transcriptional modulator	0	0	0	0	0	0	0	0	0	0	0	0	0	0	0	0	0
b1342	ydaN predicted Zn(II) transporter	0	0	0	0	0	0	0	0	0	0	0	0	0	0	0	0	0
b1343	dbpA DEAD box RNA helicase and RNA-dependent ATPase	0	0	0	0	0	0	0	0	0	0	0	0	0	0	0	0	0
b1344	ttcA predicted C32 tRNA thiolase	0	0	0	0	0	0	0	0	0	0	0	0	0	0	0	0	0
b1345	intR putative transposase	0	0	0	0	0	0	0	0	0	0	0	0	0	0	0	0	0
b1346	ydaQ hypothetical protein	0	0	0	0	0	0	0	0	0	0	0	0	0	0	0	0	0
b1347	ydaC hypothetical protein	0	0	0	0	0	0	0	0	0	0	0	0	0	0	0	0	0
b1349	recT recombinase, DNA renaturation	0	0	0	0	0	0	0	0	0	0	0	0	0	0	0	0	0
b1350	recE exonuclease VIII, ds DNA exonuclease, 5' --> 3' specific	0	0	0	0	0	0	0	0	0	0	0	0	0	0	0	0	0
b1351	racC Rac prophage; predicted protein	ND	ND	ND	0	0	ND	0	0	0	0	0	0	ND	0	0	0	ND
b1352	kilR Rac prophage; inhibitor of FtsZ, killing protein	ND	ND	ND	0	0	0	0	0	0	0	0	0	0	0	0	0	0
b1354	b1354	0	0	ND	0	0	0	0	0	0	0	0	0	0	0	0	0	0
b1355	ydaG hypothetical protein	ND	ND	ND	0	0	0	0	0	0	0	0	0	0	0	0	0	0
b1356	racR hypothetical protein; predicted DNA-binding transcriptional regulator	0	0	0	0	0	0	0	0	0	0	0	0	0	0	0	0	0
b1357	ydaS hypothetical protein	0	0	0	0	0	0	0	0	0	0	0	0	0	0	0	0	0
b1358	ydaT hypothetical protein	0	0	0	0	0	0	0	0	0	0	0	0	0	0	0	0	0
b1359	ydaU hypothetical protein	0	0	0	0	0	0	0	0	0	0	0	0	0	0	0	0	0
b1360	ydaV putative DNA replication factor	0	0	0	0	0	0	0	0	0	0	0	0	0	0	0	0	0
b1361	ydaW hypothetical protein	0	0	0	0	0	0	0	0	0	0	0	0	0	0	0	0	0
b1362	rzpR putative prophage lambda endopeptidase	0	0	0	-4.27405	0	0	0	0	0	0	0	0	0	0	0	0	0
b1363	trkG TrkG potassium ion Trk Transporter	0	0	0	0	0	0	0	0	0	0	0	0	0	0	0	0	0
b1364	b1364	0	0	0	0	0	0	0	0	0	0	0	0	0	0	0	0	0
b1365	ynaK Rac prophage; conserved protein	0	0	0	-3.40975	0	0	0	0	0	0	0	0	0	0	0	0	0
b1366	ydaY Rac prophage; predicted protein	0	0	0	-3.05802	0	0	0	0	0	0	0	0	0	0	0	0	0
b1367	b1367	0	0	0	0	0	0	0	0	0	0	0	0	0	0	0	0	0
b1368	ynaA Rac prophage; predicted tail protein	0	0	ND	0	0	0	0	0	0	0	0	0	0	0	0	0	0
b1369	lomR_1 Rac prophage; predicted protein, N-ter fragment	0	ND	0	ND	0	0	0	0	0	0	0	0	0	0	0	0	0
b1370	insH-5 IS5 transposase and trans-activator	0	0	0	0	0	0	0	0	0	0	0	0	0	0	0	0	0
b1371	lomR_2 hypothetical protein	0	0	0	0	0	0	0	0	0	0	0	0	0	0	0	0	0
b1372	stfR putative membrane protein	ND	ND	0	0	0	0	0	0	0	0	0	0	0	0	0	0	0
b1373	tfaR Rac prophage; predicted tail fiber assembly protein	0	ND	0	ND	0	0	0	0	0	0	0	ND	0	0	0	0	ND
b1374	pinR putative transposon resolvase	0	0	0	-3.54527	0	0	0	0	0	0	0	0	0	0	0	0	0
b1376	uspF nucleotide binding filament protein	0	0	0	-2.83851	0	0	0	0	0	0	0	0	0	0	0	0	0
b1377	ompN outer membrane pore protein N, non-specific	0	0	0	-2.18536	0	0	0	0	0	0	0	0	0	0	0	0	0
b1379	hslJ heat shock protein HslJ	ND	0	ND	0	0	0	0	0	0	0	0	0	0	0	0	0	0
b1380	ldhA D-lactate dehydrogenase	0	0	0	0	0	0	0	0	0	0	0	0	0	0	0	0	0
b1382	ynbE hypothetical protein	ND	0	ND	0	0	0	0	0	0	0	0	0	0	0	0	0	0
b1383	ydbL conserved hypothetical protein	0	0	0	0	0	0	0	0	0	0	0	0	0	0	0	0	0
b1384	feaR FeaR transcriptional activator	0	0	0	0	0	0	0	0	0	0	0	0	0	0	0	0	0
b1385	feaB phenylacetaldehyde dehydrogenase	0	0	0	0	0	0	0	0	0	0	0	0	0	0	0	0	0
b1386	tynA phenylethylamine oxidase / aminoacetone oxidase / amine oxidase (Cu containing)	0	0	0	0	0	0	0	0	0	0	0	0	0	0	0	0	0
b1388	paaA putative subunit of phenylacetate-CoA oxygenase	0	0	0	0	0	0	0	0	0	0	0	0	0	0	0	0	0
b1389	paaB putative subunit of phenylacetate-CoA oxygenase	0	0	0	0	0	0	0	0	0	0	0	0	0	0	0	0	0
b1390	paaC putative subunit of phenylacetate-CoA oxygenase	0	0	0	0	0	0	0	0	0	0	0	0	0	0	0	0	0
b1392	paaE putative oxygenase reductase of phenylacetate degradation	0	0	0	0	0	0	0	0	0	0	0	0	0	0	0	0	0
b1393	paaF putative enoyl-CoA hydratase/isomerase of phenylacetate degradation	0	0	0	0	0	0	0	0	0	0	0	0	0	0	0	0	0
b1394	paaG putative enoyl-CoA hydratase/isomerase of phenylacetate degradation	0	0	0	0	0	0	0	0	0	0	0	0	0	0	0	0	0
b1395	paaH predicted 3-hydroxy-acyl-CoA dehydrogenase of phenylacetate degradation	0	0	0	0	0	0	0	0	0	0	0	0	0	0	0	0	0
b1396	paaI hydroxyphenylacetyl-CoA thioesterase	0	0	0	0	0	0	0	0	0	0	0	0	0	0	0	0	0
b1397	paaJ beta;-ketoadipyl-CoA thiolase	0	0	0	0	0	0	0	0	0	0	0	0	0	0	0	0	0
b1398	paaK phenylacetate-CoA ligase	0	0	0	0	0	0	0	0	0	0	0	0	0	0	0	0	0
b1399	paaX PaaX transcriptional repressor	0	0	0	0	0	0	0	0	0	0	0	0	0	0	0	0	0
b1400	paaY predicted hexapeptide repeat acetyltransferase	0	0	0	-2.17376	0	0	0	0	0	0	0	0	0	0	0	0	0
b1401	ydbA_1	0	0	0	0	0	0	0	0	0	0	0	0	0	0	0	0	0
b1402	insD-2 IS2 element protein	0	0	0	-4.30064	0	0	0	0	0	0	0	0	0	0	0	0	0
b1404	insI-2 transposase of IS30	0	0	0	0	0	0	0	0	0	0	0	0	0	0	0	0	0
b1405	ydbA_2	0	0	0	0	0	0	0	0	0	0	0	0	0	0	0	0	0
b1406	ydbC predicted oxidoreductase, NAD(P)-binding	0	0	0	0	0	0	0	0	0	0	0	0	0	0	0	0	0
b1407	ydbD predicted protein	0	0	0	-2.47586	0	0	0	0	0	0	0	0	0	0	0	0	0
b1408	ynbA putative diacylglycerol cholinephosphotransferase	0	0	0	0	0	0	0	0	0	0	0	0	0	0	0	0	0
b1409	ynbB predicted CDP-diglyceride synthase	0	0	0	-3.34168	0	0	0	0	0	0	0	0	0	0	0	0	0
b1410	ynbC predicted hydrolase	0	0	0	0	0	0	0	0	0	0	0	0	0	0	0	0	0
b1411	ynbD predicted phosphatase, inner membrane protein	0	0	0	0	0	0	0	0	0	0	0	0	0	0	0	0	0
b1412	azoR NADH-azoreductase, FMN-dependent	0	0	0	0	0	0	0	0	0	0	0	0	0	0	0	0	0
b1414	ydcF conserved hypothetical protein	0	0	0	0	0	0	0	0	0	0	0	0	0	0	0	0	0
b1415	aldA aldehyde dehydrogenase A, NAD-linked	0	0	0	0	0	0	0	0	0	0	0	0	0	0	0	0	0
b1416	gapC_2	ND	ND	ND	ND	0	ND	0	0	0	ND	0	0	ND	0	0	0	0
b1417	gapC_1	0	0	0	0	0	0	0	0	0	ND	0	0	0	0	0	0	0
b1418	cybB cytochrome b561	ND	0	ND	0	0	0	0	0	0	0	0	0	0	0	0	0	0
b1419	ydcA hypothetical protein	0	0	ND	0	0	0	0	0	0	0	0	0	0	0	0	0	0
b1420	mokB regulatory peptide whose translation enables hokB expression	ND	ND	ND	ND	ND	ND	0	0	0	0	0	ND	0	0	0	0	ND
b1421	trg MCP-III	0	0	0	ND	0	0	0	0	0	0	0	0	0	0	0	0	0
b1422	ydcI putative transcriptional regulator LysR-type	0	0	0	0	0	0	0	0	0	0	0	0	0	0	0	0	0
b1423	ydcJ conserved hypothetical protein	0	0	0	0	0	0	0	0	0	0	0	0	0	0	0	0	0
b1424	mdoD glucan biosynthesis protein D	0	0	0	-2.22492	0	0	0	0	0	0	0	0	0	0	3.13557	0	0
b1425	b1425	ND	0	ND	0	0	0	0	0	0	0	0	0	0	0	0	0	0
b1426	ydcH conserved hypothetical protein	ND	ND	ND	0	0	0	0	0	0	0	0	0	0	0	0	0	0
b1427	rimL ribosomal-protein-L12-serine acetyltransferase	0	0	0	0	0	0	0	0	0	0	0	0	0	0	0	0	0
b1428	ydcK predicted enzyme	0	0	0	0	0	0	0	0	0	0	0	0	0	0	0	0	0
b1429	tehA TehA TDT transporter	0	0	0	0	0	0	0	0	0	0	0	0	0	0	0	0	0
b1430	tehB tellurite resistance protein	0	0	0	0	0	0	0	0	0	0	0	0	0	0	0	0	0
b1431	ydcL conserved hypothetical protein	0	0	0	0	-1.84847	0	0	0	0	0	0	0	0	0	0	0	0
b1433	ydcO YdcO	0	0	0	0	0	0	0	0	0	0	0	0	0	0	0	0	0
b1434	ydcN predicted DNA-binding transcriptional regulator	0	0	0	0	0	0	0	0	0	0	0	0	0	0	0	0	0
b1435	ydcP putative collagenase	0	0	0	0	0	0	0	0	0	0	0	0	0	0	0	0	0
b1436	yncJ predicted protein	0	0	ND	0	0	0	0	0	0	0	0	0	0	0	0	0	0
b1437	b1437	0	0	0	0	0	0	0	0	0	0	0	0	0	0	0	0	0
b1438	ydcQ predicted DNA-binding transcriptional regulator	0	ND	0	ND	0	0	0	0	0	0	0	ND	0	0	0	0	ND
b1439	ydcR fused predicted DNA-binding transcriptional regulator and predicted amino transferase	0	0	0	0	0	0	0	0	0	0	0	0	0	0	0	0	0
b1440	ydcS YdcS/YdcT/YdcV/YdcU ABC transporter	0	0	0	0	0	0	0	0	0	0	0	0	0	0	0	0	0
b1441	ydcT YdcS/YdcT/YdcV/YdcU ABC transporter	0	0	0	0	0	0	0	0	0	0	0	0	0	0	0	0	0
b1442	ydcU YdcS/YdcT/YdcV/YdcU ABC transporter	0	0	0	0	0	0	0	0	0	0	0	0	0	0	0	0	0
b1443	ydcV YdcS/YdcT/YdcV/YdcU ABC transporter	0	0	0	0	0	0	0	0	0	0	0	0	0	0	0	0	0
b1444	ydcW gamma;-aminobutyraldehyde dehydrogenase	0	0	0	0	0	0	0	0	0	0	0	0	0	0	0	0	0
b1445	ydcX hypothetical protein	0	0	0	0	0	0	0	0	0	0	0	0	0	0	0	0	0
b1446	ydcY hypothetical protein	0	0	0	0	0	0	0	0	0	0	0	0	0	0	0	0	0
b1447	ydcZ putative transport protein	0	0	0	0	0	0	0	0	0	0	0	0	0	0	0	0	0
b1448	yncA predicted acyltransferase with acyl-CoA N-acyltransferase domain	0	0	0	0	0	0	0	0	0	0	0	0	0	0	0	0	0
b1449	yncB predicted oxidoreductase, Zn-dependent and NAD(P)-binding	0	0	0	-2.65468	0	0	0	0	0	0	0	0	0	0	0	0	0
b1450	yncC predicted DNA-binding transcriptional regulator	0	0	0	-2.44822	0	0	0	0	0	0	0	0	0	0	0	0	0
b1451	yncD probable TonB-dependent receptor	0	0	0	-2.44419	0	0	0	0	0	0	0	0	0	0	0	0	0
b1452	yncE conserved protein	ND	ND	ND	0	0	0	0	0	0	0	0	0	0	0	0	0	0
b1453	ansP AnsP L-asparagine APC Transporter	0	0	0	0	0	0	0	0	0	0	0	0	0	0	0	0	0
b1456	rhsE	0	0	0	0	0	0	0	0	0	0	0	0	0	0	0	0	0
b1457	ydcD hypothetical protein	0	ND	ND	0	0	0	0	0	0	0	0	0	0	0	0	0	0
b1458	yncI predicted protein	ND	ND	ND	ND	0	0	0	0	0	0	0	0	0	0	0	0	0
b1460	ydcC conserved protein, similar to H-repeat associated proteins	0	0	0	0	0	0	0	0	0	0	0	0	0	0	0	0	0
b1462	yddH conserved proteion	0	0	0	-2.92874	0	0	0	0	0	0	0	0	0	0	0	0	0
b1463	nhoA N-hydroxyarylamine O-acetyltransferase	0	0	0	0	0	0	0	0	0	0	0	0	0	0	0	0	0
b1464	yddE conserved protein	0	0	0	0	0	0	0	0	0	0	0	0	0	0	0	0	0
b1465	narV nitrate reductase Z, gamma; subunit	0	0	0	0	0	0	0	0	0	ND	0	0	0	0	0	0	0
b1466	narW NarW, probable private chaperone for NarZ nitrate reductase subunit	0	0	0	0	0	0	0	0	0	0	0	0	0	0	0	0	0
b1467	narY nitrate reductase Z, beta; subunit	0	0	0	0	0	0	0	0	0	0	0	0	0	0	0	0	0
b1469	narU NarU MFS nitrate/nitrite antiporter	0	-3.08398	-3.80464	-3.91845	0	0	0	0	0	0	0	0	0	0	0	0	0
b1470	yddJ hypothetical protein	ND	ND	ND	0	0	0	0	0	0	0	0	0	0	0	0	0	0
b1471	yddK predicted protein	0	ND	ND	0	0	0	0	0	0	0	0	0	0	0	0	0	0
b1472	yddL predicted lipoprotein	ND	ND	ND	0	0	0	0	0	0	0	0	0	0	0	0	0	0
b1473	yddG predicted methyl viologen efflux pump	0	0	0	-3.36847	0	0	0	0	0	0	0	0	0	0	0	0	0
b1474	fdnG formate dehydrogenase N, alpha; subunit	0	0	0	0	0	0	0	0	0	0	0	0	0	0	0	0	0
b1475	fdnH formate dehydrogenase N, beta; subunit	0	0	0	0	0	0	0	0	0	0	0	0	0	0	0	0	0
b1477	yddM predicted DNA-binding transcriptional regulator	0	0	0	0	0	0	0	0	0	0	0	0	0	0	0	0	0
b1478	adhP ethanol dehydrogenase	0	0	0	0	0	0	0	0	0	0	0	0	0	0	0	0	0
b1479	maeA malate dehydrogenase, NAD-requiring	-3.07352	0	0	-3.39766	0	0	0	0	0	0	0	0	0	0	0	0	0
b1481	bdm biofilm-dependent modulation protein	-2.58737	0	0	-3.37259	0	0	0	0	0	0	0	0	0	0	0	0	0
b1482	osmC osmotically inducible peroxidase OsmC	0	0	0	0	0	0	0	0	0	0	0	0	0	0	0	0	0
b1483	ddpF YddO	0	0	0	0	0	0	0	0	0	0	0	0	0	0	0	0	0
b1484	ddpD YddP	0	0	0	0	0	0	0	0	0	0	0	0	0	0	0	0	0
b1485	ddpC YddQ	0	0	0	0	0	0	0	0	0	0	0	0	0	0	0	0	0
b1486	ddpB YddR	0	0	0	0	0	0	0	0	0	0	0	0	0	0	0	0	0
b1488	ddpX D-Ala-D-Ala dipeptidase	0	0	0	0	0	0	0	0	0	0	0	0	0	0	0	0	0
b1489	dos phosphodiesterase, heme-regulated	0	0	0	-2.68197	0	0	0	0	0	0	0	0	0	0	0	0	0
b1490	yddV diguanylate cyclase	0	0	0	0	0	0	0	0	0	0	0	0	0	0	0	0	0
b1491	yddW conserved protein, glycosyltransferase domain	0	0	0	-2.28636	0	0	0	0	0	0	0	0	0	0	0	0	0
b1492	gadC GadC GABA APC transporter	0	0	0	0	0	0	0	0	0	0	0	0	0	0	0	0	0
b1493	gadB glutamate decarboxylase B subunit	0	0	0	0	0	0	0	0	0	0	0	0	0	0	0	0	0
b1494	pqqL putative zinc peptidase	0	0	0	-4.69368	0	0	0	0	0	0	0	0	0	0	0	0	0
b1495	yddB conserved protein	0	0	0	-3.29331	0	0	0	0	0	0	0	0	0	0	0	0	0
b1496	yddA YddA complex	0	0	0	-2.37654	0	0	0	0	0	0	0	0	0	0	0	0	0
b1497	ydeM predicted anaerobic sulfatase maturation enzyme; predicted DNA-binding transcriptional regulator	0	ND	ND	0	0	0	0	0	0	0	0	0	0	0	0	0	0
b1498	ydeN putative sulfatase	0	0	ND	ND	0	0	0	0	0	0	0	0	0	0	0	0	0
b1499	ydeO YdeO transcriptional activator	0	0	0	0	0	0	0	0	0	0	0	0	0	0	0	0	0
b1500	b1500	ND	0	ND	0	0	0	0	0	0	0	0	0	0	0	0	0	0
b1501	ydeP acid resistance protein	0	0	0	0	0	0	0	0	0	0	0	0	0	0	0	0	0
b1502	ydeQ predicted fimbrial-like adhesin protein	0	0	0	0	0	0	0	0	0	0	0	0	0	0	0	0	0
b1503	ydeR predicted fimbrial-like adhesin protein	0	ND	0	ND	0	0	0	0	0	0	0	0	0	0	0	0	0
b1504	ydeS predicted fimbrial-like adhesin protein	0	ND	0	ND	0	0	0	0	0	0	0	ND	0	0	0	0	ND
b1505	ydeT predicted protein	0	0	0	0	0	0	0	0	0	0	0	0	0	0	0	0	0
b1506	yneL predicted transcriptional regulator	0	ND	0	0	0	0	0	0	0	0	0	0	0	0	0	0	0
b1507	hipA serine kinase HipA	0	0	0	0	0	0	0	0	0	0	0	0	0	0	0	0	0
b1508	hipB HipB Polypeptide	ND	ND	ND	0	0	0	0	0	0	0	0	0	0	0	0	0	0
b1509	ydeU conserved protein	0	ND	0	ND	0	0	0	0	0	0	0	ND	0	0	0	0	0
b1510	ydeK predicted lipoprotein	0	0	0	-2.31648	0	0	0	0	0	0	0	0	0	0	0	0	0
b1511	lsrK putative kinase	0	0	0	0	0	0	0	0	0	0	0	0	0	0	0	0	0
b1512	lsrR LsrR transcriptional repressor	0	0	0	0	0	0	0	0	0	0	0	0	0	0	0	0	0
b1513	lsrA LsrA/LsrC/LsrD/LsrB ABC transporter	0	0	0	0	0	0	0	0	0	0	0	0	0	0	0	0	0
b1514	lsrC LsrA/LsrC/LsrD/LsrB ABC transporter	0	0	0	0	0	0	0	0	0	0	0	0	0	0	0	0	0
b1515	lsrD LsrA/LsrC/LsrD/LsrB ABC transporter	0	0	0	0	0	0	0	0	0	0	0	0	0	0	0	0	0
b1516	lsrB LsrA/LsrC/LsrD/LsrB ABC transporter	0	0	0	0	0	0	0	0	0	0	0	0	0	0	0	0	0
b1517	lsrF predicted aldolase	0	ND	0	ND	0	0	0	0	0	0	0	ND	0	0	0	0	ND
b1518	lsrG conserved protein	0	0	0	0	0	0	0	0	0	0	0	0	0	0	0	0	0
b1519	tam trans-aconitate methyltransferase	0	0	0	0	0	0	0	0	0	0	0	0	0	0	0	0	0
b1520	yneE conserved inner membrane protein	0	0	0	0	0	0	0	0	0	0	0	0	0	0	0	0	0
b1521	uxaB altronate oxidoreductase	0	0	ND	ND	0	0	0	0	0	0	0	0	0	0	0	0	0
b1522	yneF predicted diguanylate cyclase	0	0	0	0	0	0	0	0	0	0	0	0	0	0	0	0	0
b1523	yneG conserved protein	0	0	0	0	0	0	0	0	0	0	0	0	0	0	0	0	0
b1524	yneH predicted glutaminase	0	0	0	0	0	0	0	0	0	0	0	0	0	0	0	0	0
b1525	yneI NAD(P) +-dependent succinate semialdehyde dehydrogenase	0	0	0	0	0	0	0	0	0	0	0	0	0	0	0	0	0
b1526	yneJ predicted DNA-binding transcriptional regulator, LysR-type	0	0	0	-2.76783	0	0	0	0	0	0	0	0	0	0	0	0	0
b1527	yneK predicted protein	0	0	0	-2.41338	0	0	0	0	0	-2.55573	0	0	0	0	0	0	0
b1528	ydeA YdeA MFS transporter	0	0	0	-3.08813	0	0	0	0	0	0	0	0	0	0	0	0	0
b1529	marC inner membrane protein involved in multiple antibiotic resistance	0	0	0	0	0	0	0	0	0	0	0	0	0	0	0	0	0
b1530	marR MarR transcriptional repressor	0	0	0	0	0	0	0	0	0	0	0	0	0	0	0	0	0
b1531	marA MarA transcriptional dual regulator	ND	ND	ND	0	0	0	0	0	0	0	0	0	0	0	0	0	0
b1532	marB multiple antibiotic resistance protein	0	0	0	0	0	0	0	0	0	0	0	0	ND	0	0	0	ND
b1533	eamA O-acetylserine/cysteine export protein	0	0	0	0	0	0	0	0	0	0	0	0	0	0	0	0	0
b1534	ydeE YdeE MFS transporter	0	0	0	0	0	0	0	0	0	0	0	0	0	0	0	0	0
b1535	ydeH conserved protein	0	ND	0	ND	0	0	0	0	0	0	0	ND	0	0	0	0	ND
b1536	ydeI conserved protein	0	0	0	0	0	0	0	0	0	0	0	0	0	0	0	0	0
b1537	ydeJ conserved protein	0	ND	0	ND	0	0	0	0	0	0	0	ND	0	0	0	0	ND
b1538	dcp dipeptidyl carboxypeptidase II	0	0	0	ND	0	0	0	0	0	0	0	0	0	0	0	0	0
b1539	ydfG 3-hydroxy acid dehydrogenase monomer	0	0	0	0	0	0	0	0	0	0	0	0	0	0	0	0	0
b1540	ydfH predicted DNA-binding transcriptional regulator	0	0	0	0	0	0	0	0	0	0	0	0	0	0	0	0	0
b1541	ydfZ conserved protein	0	ND	0	0	0	0	0	0	0	0	0	0	0	0	0	0	0
b1542	ydfI predicted mannonate dehydrogenase	0	0	0	0	0	0	0	0	0	0	0	0	0	0	0	0	0
b1543	ydfJ predicted transporter	0	0	0	-2.60183	0	0	0	0	0	0	0	0	0	0	0	0	0
b1545	pinQ Qin prophage; predicted site-specific recombinase	0	0	0	-2.18208	0	0	0	0	0	0	0	0	0	0	0	0	0
b1546	tfaQ Qin prophage; predicted tail fibre assembly protein	0	0	0	0	0	0	0	0	0	0	0	0	0	0	0	0	0
b1547	ydfN Qin prophage; predicted side tail fibre assembly protein	0	0	0	0	0	0	0	0	0	0	0	0	ND	0	0	0	0
b1548	nohA Qin prophage; predicted packaging protein	ND	0	0	0	0	0	0	0	0	0	0	0	0	0	0	0	0
b1549	ydfO Qin prophage; predicted protein	ND	ND	0	0	0	0	0	0	0	0	0	0	0	0	0	0	0
b1551	ynfN Qin prophage; predicted protein	0	0	0	0	0	0	0	0	0	0	0	0	0	0	0	0	0
b1552	cspI Qin prophage; cold shock protein	ND	ND	ND	0	0	0	0	0	0	0	0	0	0	0	0	0	0
b1553	ydfP Qin prophage; conserved protein	0	0	0	0	0	0	0	0	0	0	0	0	0	0	0	0	0
b1554	ydfQ Qin prophage; predicted lysozyme	0	0	0	0	0	0	0	0	0	0	0	0	0	0	0	0	0
b1555	ydfR Qin prophage; predicted protein	0	0	ND	0	0	0	0	0	0	0	0	0	0	0	0	0	0
b1556	essQ Qin prophage; predicted S lysis protein	0	0	0	0	0	0	0	0	0	0	0	0	0	0	0	0	0
b1558	cspF Qin prophage; cold shock protein	0	0	ND	0	0	0	0	0	0	0	0	0	0	0	0	0	0
b1559	ydfT Qin prophage; predicted antitermination protein Q	0	0	0	0	0	0	0	0	0	0	0	0	0	0	0	0	0
b1560	ydfU Qin prophage; predicted protein	0	0	0	0	0	0	0	0	0	0	0	0	0	0	0	0	0
b1561	rem Qin prophage; predicted protein	0	ND	ND	0	0	0	0	0	0	0	0	0	0	0	0	0	0
b1562	hokD Qin prophage; small toxic polypeptide	0	ND	0	0	0	0	0	0	0	0	0	0	0	0	0	0	0
b1563	relE Qin prophage; toxin of the RelE-RelB toxin-antitoxin system	ND	ND	0	ND	0	0	0	0	0	0	0	0	0	0	0	0	ND
b1564	relB Qin prophage; antitoxin of the RelE-RelB toxin-antitoxin system and transcriptional repressor of relBEF	0	ND	ND	0	0	0	0	0	0	0	0	0	0	0	0	0	0
b1565	ydfV Qin prophage; predicted protein	0	0	0	0	0	0	0	0	0	0	0	0	0	0	0	0	0
b1566	flxA Qin prophage; predicted protein	0	0	0	0	0	0	0	0	0	0	0	0	0	0	0	0	0
b1568	ydfX Qin prophage; predicted protein	0	0	0	0	0	0	0	0	0	0	0	0	0	0	0	0	0
b1569	dicC Qin prophage; DNA-binding transcriptional regulator for DicB	ND	ND	ND	0	0	0	0	0	0	0	0	0	0	0	0	0	0
b1570	dicA DicA transcriptional repressor	ND	ND	ND	0	0	0	0	0	0	0	0	0	0	0	0	0	0
b1571	ydfA Qin prophage; predicted protein	ND	ND	0	0	0	0	0	0	0	0	0	0	0	0	0	0	0
b1572	ydfB Qin prophage; predicted protein	ND	0	ND	ND	0	ND	0	0	0	0	0	0	0	0	0	0	ND
b1573	rzpQ Qin prophage; predicted protein	ND	ND	0	0	0	0	0	0	0	0	0	0	0	0	0	0	0
b1575	dicB Qin prophage; cell division inhibition protein	ND	ND	0	0	0	ND	0	0	0	0	0	0	0	0	0	0	0
b1576	ydfD Qin prophage; predicted protein	ND	ND	ND	0	0	0	0	0	0	0	0	0	0	0	0	0	0
b1577	ydfE Qin prophage; predicted protein	0	0	0	-3.33204	0	0	0	0	0	0	0	0	0	0	0	0	0
b1578	insD Qin prophage; predicted transposase	0	0	0	-4.03398	0	0	0	0	0	0	0	0	0	0	0	0	0
b1579	intQ Qin prophage; predicted defective integrase	0	ND	ND	-2.50228	0	0	0	0	0	0	0	0	0	0	0	0	0
b1580	rspB predicted oxidoreductase, Zn-dependent and NAD(P)-binding	0	0	0	-2.43995	0	0	0	0	0	0	0	0	0	0	0	0	0
b1581	rspA mannonate/altronate dehydratase	0	0	0	0	0	0	0	0	0	0	0	0	0	0	0	0	0
b1582	ynfA inner membrane protein	0	0	0	0	0	0	0	0	0	0	0	0	0	0	0	0	0
b1583	ynfB predicted protein	0	0	0	0	0	0	0	0	0	0	0	0	0	0	0	0	0
b1584	speG spermidine acetyltransferase	0	0	0	-2.72087	0	0	0	0	0	0	0	0	0	0	0	0	0
b1586	ynfD predicted protein	0	0	0	0	0	0	0	0	0	0	0	0	0	0	0	0	0
b1587	ynfE oxidoreductase subunit paralog of DmsA	0	0	0	0	0	0	0	0	0	0	0	0	0	0	0	0	0
b1588	ynfF oxidoreductase subunit	0	0	0	0	0	0	0	0	0	0	0	0	0	0	0	0	0
b1589	ynfG oxidoreductase, Fe-S subunit paralog of DmsB	0	0	0	0	0	0	0	0	0	0	0	0	0	0	0	0	0
b1590	ynfH DMSO reductase anchor subunit, paralog of DmsC	0	0	0	0	0	0	0	0	0	0	0	0	0	0	0	0	0
b1591	dmsD DMS reductase maturation protein	0	0	0	0	0	0	0	0	0	0	0	0	0	0	0	0	0
b1592	clcB YnfJ chloride ion ClC transporter	0	0	0	0	0	0	0	0	0	0	0	0	0	0	0	0	0
b1593	ynfK predicted dethiobiotin synthetase	0	0	0	0	0	0	0	0	0	0	0	0	0	0	0	0	0
b1594	dgsA DgsA transcriptional repressor	0	0	0	0	0	0	0	0	0	0	0	0	0	0	0	0	0
b1595	ynfL predicted DNA-binding transcriptional regulator	0	0	0	0	0	0	0	0	0	0	0	0	0	0	0	0	0
b1596	ynfM YnfM MFS transporter	0	0	0	0	0	0	0	0	0	0	0	0	0	0	0	0	0
b1597	asr acid shock protein	0	0	0	0	0	0	0	0	0	0	0	0	0	0	0	0	0
b1598	ydgD predicted peptidase	0	0	0	-2.25243	0	0	0	0	0	0	0	0	0	0	0	0	0
b1599	mdtI MdtI SMR Protein	0	0	0	0	0	0	0	0	0	0	0	0	0	0	0	0	0
b1600	mdtJ MdtJ SMR protein	0	0	0	ND	0	0	0	-1.71859	0	0	0	0	0	0	0	0	0
b1601	tqsA transporter of quorum signal AI-2	0	0	0	0	0	0	0	0	0	0	0	0	0	0	0	0	0
b1603	pntA pyridine nucleotide transhydrogenase, alpha; subunit	0	0	0	0	0	-3.25367	0	0	0	0	0	0	0	0	0	0	0
b1604	ydgH predicted protein	0	0	0	0	0	0	0	0	0	0	0	0	0	0	0	0	0
b1605	ydgI ArcD APC transporter	0	0	0	0	0	0	0	0	0	0	0	0	0	0	0	0	0
b1606	folM dihydrofolate reductase	0	0	0	0	0	0	1.57763	0	0	0	0	0	0	0	0	2.92455	0
b1607	ydgC hypothetical protein	0	0	0	0	0	0	0	0	0	0	0	0	0	0	0	0	0
b1608	rstA RstA- Phosphorylated transcriptional regulator	0	0	0	0	0	0	0	0	0	0	0	0	0	0	0	0	0
b1609	rstB RstB-P his	ND	0	0	0	0	0	0	0	0	0	0	0	0	0	0	0	0
b1610	tus DNA-binding protein; inhibition of replication at Ter sites	0	0	0	0	0	0	0	0	0	0	0	0	0	0	0	0	0
b1611	fumC fumarase C monomer	0	0	0	0	0	0	0	0	0	0	0	0	0	0	0	0	0
b1612	fumA fumarase A monomer	0	0	0	0	0	0	1.52457	0	0	0	0	0	0	0	0	0	0
b1613	manA mannose-6-phosphate isomerase	0	0	0	0	0	0	0	0	0	0	0	0	0	0	0	0	0
b1614	ydgA conserved protein	0	0	0	0	0	0	0	0	0	0	0	0	0	0	0	0	0
b1615	uidC membrane-associated protein	ND	0	ND	0	0	0	0	0	0	0	0	0	0	0	0	0	0
b1616	uidB UidB glucuronides GPH transporter	0	0	0	-2.36901	0	0	0	0	0	0	0	0	0	0	0	0	0
b1617	uidA beta;-glucuronidase	0	0	ND	-2.5002	-1.61686	0	0	0	0	0	0	0	0	0	0	0	0
b1618	uidR UidR transcriptional repressor	0	0	0	0	0	0	0	0	0	0	0	0	0	0	0	0	0
b1619	hdhA 7-alpha;-hydroxysteroid dehydrogenase	0	0	0	0	0	0	0	0	0	0	0	0	0	0	0	0	0
b1620	malI MalI transcriptional repressor	0	ND	ND	0	0	0	0	0	0	0	0	0	0	0	0	0	0
b1621	malX EIIBCMalX	0	0	0	0	0	0	0	0	0	0	0	0	0	0	0	0	0
b1622	malY bifunctional: repressor of maltose regulon	0	ND	ND	0	0	0	0	0	-3.17998	0	0	0	0	0	0	0	ND
b1623	add deoxyadenosine deaminase / adenosine deaminase	0	0	0	0	0	0	0	0	0	0	0	0	0	0	0	0	0
b1624	ydgJ putative galactose 1-dehydrogenase	0	0	0	0	0	0	0	0	0	0	0	0	0	0	0	0	0
b1625	cnu H-NS- and StpA-binding protein	0	0	-2.92535	0	0	0	0	0	0	0	0	0	0	0	0	0	0
b1626	ydgK conserved inner membrane protein	0	0	-2.84988	-2.33407	0	0	0	0	0	0	0	0	0	0	0	0	0
b1627	rsxA integral membrane protein of SoxR-reducing complex	0	0	-3.42623	-3.03895	0	0	0	0	0	0	0	0	0	0	0	0	0
b1628	rsxB member of SoxR-reducing complex	0	0	0	0	0	0	0	0	0	0	0	0	0	0	0	0	0
b1629	rsxC member of SoxR-reducing complex	0	0	0	0	0	0	0	0	0	0	0	0	0	0	0	0	0
b1630	rsxD integral membrane protein of SoxR-reducing complex	0	0	0	0	0	0	0	0	0	2.26552	0	0	0	0	0	2.49657	0
b1631	rsxG member of SoxR-reducing complex	0	0	0	0	0	0	0	0	0	0	0	0	0	0	0	2.52264	0
b1632	rsxE integral membrane protein of SoxR-reducing complex	0	0	0	0	0	0	0	0	0	0	0	0	0	0	0	0	0
b1633	nth endonuclease III; specific for apurinic and/or apyrimidinic sites	0	0	0	0	0	0	0	0	0	0	0	0	0	0	0	0	0
b1634	tppB YdgR putative peptide POT Transporter	0	0	0	0	0	0	0	0	0	0	0	0	0	0	0	0	0
b1635	gst glutathione S-transferase	0	0	0	0	0	0	0	0	0	0	0	0	0	0	0	0	0
b1636	pdxY pyridoxal kinase 2	0	0	0	0	0	0	0	0	0	0	0	0	0	0	0	0	0
b1637	tyrS tyrosyl-tRNA synthetase	0	0	ND	0	0	0	0	0	0	0	0	0	0	0	0	0	0
b1638	pdxH pyridoxine 5'-phosphate oxidase / pyridoxamine 5'-phosphate oxidase	0	0	0	0	0	0	0	0	0	0	0	0	0	0	0	0	0
b1639	ydhA predicted lipoprotein	0	0	ND	0	0	0	0	0	0	0	0	0	0	0	0	0	0
b1640	anmK anhydro-N-acetylmuramic acid kinase	0	0	0	0	0	0	0	0	0	0	0	0	0	-1.60993	0	0	0
b1641	slyB outer membrane lipoprotein	0	0	0	0	0	0	0	0	2.84726	0	0	0	0	0	0	0	0
b1642	slyA SlyA transcriptional activator	0	0	0	0	0	0	0	0	0	0	0	0	0	0	0	0	0
b1643	ydhI predicted inner membrane protein	0	0	0	0	0	0	0	0	0	0	0	0	0	0	0	0	0
b1644	ydhJ conserved protein	0	0	0	0	0	0	0	0	0	0	0	0	0	0	0	0	0
b1645	ydhK conserved inner membrane protein	0	0	0	0	0	0	0	0	0	0	0	0	0	0	0	0	0
b1646	sodC superoxide dismutase precursor (Cu-Zn)	0	0	0	0	0	0	0	0	0	0	0	0	0	0	0	0	0
b1647	ydhF predicted oxidoreductase	0	0	0	0	0	0	0	0	0	0	0	0	0	0	0	0	0
b1648	ydhL conserved protein	0	0	0	0	0	0	0	0	0	0	0	0	0	0	0	0	0
b1649	ydhM predicted DNA-binding transcriptional regulator	0	0	0	0	0	0	0	0	0	0	0	0	0	0	0	0	0
b1650	nemA N-ethylmaleimide reductase, FMN-linked	0	0	0	0	0	0	0	0	0	0	0	0	0	0	0	0	0
b1651	gloA glyoxalase I	0	0	0	0	0	0	0	0	0	0	0	0	0	0	0	0	0
b1652	rnt RNase T	0	0	0	0	0	0	0	0	0	0	0	0	0	0	0	0	0
b1654	grxD glutaredoxin 4	0	2.69081	0	0	0	0	0	0	0	0	0	0	0	0	0	0	0
b1655	ydhO putative lipoprotein	0	0	0	0	0	0	0	0	0	0	0	0	0	0	0	0	0
b1656	sodB superoxide dismutase (Fe)	0	0	ND	0	0	0	0	0	0	0	0	0	0	0	0	0	0
b1657	ydhP YdhP	0	ND	0	ND	0	0	0	0	0	0	0	ND	0	0	0	0	ND
b1658	purR PurR-Hypoxanthine transcriptional repressor	0	0	0	0	0	0	0	0	0	0	0	0	0	0	0	0	0
b1659	ydhB protein with similarity to transcriptional regulators	0	0	0	0	0	0	0	0	0	0	0	0	0	0	0	0	0
b1660	ydhC YdhC drug MFS transporter	0	ND	0	ND	0	0	0	0	0	0	0	ND	0	0	0	0	ND
b1661	cfa cyclopropane fatty acyl phospholipid synthase	0	0	0	0	0	0	0	0	0	0	0	0	0	0	0	0	0
b1662	ribC riboflavin synthase	0	0	0	0	0	0	0	0	0	0	0	0	0	0	0	0	0
b1663	mdtK NorE multidrug efflux MATE transporter	0	0	0	0	0	0	0	0	0	0	0	0	0	0	0	0	0
b1664	ydhQ conserved protein	0	0	0	0	0	0	0	0	0	0	0	0	0	0	0	0	0
b1667	ydhR predicted mono-oxygenase	0	ND	ND	0	0	0	0	0	0	0	0	0	0	0	0	0	0
b1668	ydhS conserved protein with FAD/NAD(P)-binding domain	0	0	0	-3.08832	-2.5451	0	0	0	0	0	0	0	0	0	0	0	0
b1669	ydhT conserved protein	0	0	0	0	0	0	0	0	0	0	0	0	0	0	0	0	0
b1670	ydhU predicted cytochrome	0	0	0	0	0	0	0	0	0	0	0	0	0	0	0	0	0
b1671	ydhX predicted 4Fe-4S ferredoxin-type protein	0	0	0	0	0	0	0	0	0	0	0	0	0	0	0	0	0
b1672	ydhW predicted protein	0	0	0	0	0	0	0	0	0	0	0	0	0	0	0	0	0
b1673	ydhV predicted oxidoreductase	0	0	-2.9859	0	0	0	0	0	0	-2.26806	0	0	0	0	0	0	0
b1674	ydhY predicted 4Fe-4S ferredoxin-type protein	0	0	0	-2.65007	0	0	0	0	0	0	0	0	0	0	0	0	0
b1675	ydhZ predicted protein	0	0	0	0	0	0	0	0	ND	ND	0	0	ND	ND	0	ND	0
b1676	pykF pyruvate kinase I monomer	0	-2.29916	0	0	0	0	0	2.48588	3.84699	-2.16493	6.04443	0	0	0	0	0	0
b1677	lpp murein lipoprotein	ND	ND	ND	0	0	0	0	0	0	0	4.76137	0	0	0	0	0	0
b1678	ynhG conserved protein	0	0	0	0	0	0	0	0	0	0	0	0	0	0	0	0	0
b1679	sufE sulfur acceptor that activates SufS cysteine desulfurase	0	0	0	0	0	0	0	0	0	0	0	0	0	0	0	0	0
b1680	sufS L-selenocysteine lyase (and L-cysteine desulfurase) monomer	0	0	0	0	0	0	0	2.28276	0	0	0	0	0	0	0	0	0
b1681	sufD component of SufB-SufC-SufD cysteine desulfurase (SufS) activator complex	0	0	0	0	0	0	0	1.65913	0	0	0	0	0	0	0	0	0
b1682	sufC component of SufBCD complex	0	0	0	0	0	0	0	0	0	0	0	0	0	0	0	0	0
b1683	sufB component of SufB-SufC-SufD cysteine desulfurase (SufS) activator complex	0	ND	0	ND	0	0	0	1.91501	0	0	0	ND	0	0	0	0	ND
b1684	sufA Fe-S cluster assembly protein	0	0	0	0	0	0	0	1.89281	0	0	0	0	0	0	0	0	0
b1685	ydiH predicted protein	0	0	0	0	0	0	0	0	0	0	0	0	0	0	0	0	0
b1686	ydiI esterase	0	0	0	0	0	0	0	0	0	0	0	0	0	0	0	0	0
b1687	ydiJ predicted FAD-linked oxidoreductase	0	0	0	0	0	0	0	0	0	0	0	0	0	0	0	0	0
b1688	ydiK predicted inner membrane protein	0	0	0	0	0	0	0	0	0	0	0	0	0	0	0	0	0
b1689	ydiL conserved protein	0	0	0	0	0	0	0	0	0	0	0	0	0	0	0	0	0
b1690	ydiM predicted transporter	0	0	0	-2.60333	0	0	0	0	0	0	0	0	0	0	0	0	0
b1691	ydiN predicted amino acid/amine MFS transporter	0	0	0	-2.29747	0	0	0	0	0	0	0	0	0	0	0	0	0
b1692	ydiB shikimate dehydrogenase / quinate dehydrogenase	0	0	0	0	0	0	0	0	0	0	0	0	0	0	0	0	0
b1693	aroD 3-dehydroquinate dehydratase	0	0	0	0	0	0	0	0	0	0	0	0	0	0	0	0	0
b1694	ydiF fused predicted acetyl-CoA:acetoacetyl-CoA transferase: alpha; subunit/beta; subunit	0	0	0	-3.70697	0	0	0	0	0	0	0	0	0	0	0	0	0
b1695	ydiO predicted acyl-CoA dehydrogenase	0	0	0	0	0	0	0	0	0	0	0	0	0	0	0	0	0
b1696	ydiP predicted DNA-binding transcriptional regulator	0	0	0	0	0	0	0	0	0	0	0	0	0	0	0	0	0
b1697	ydiQ putative subunit of YdiQ-YdiR flavoprotein	0	0	0	0	0	0	0	0	0	0	0	0	0	0	0	0	0
b1698	ydiR putative subunit of YdiQ-YdiR flavoprotein	0	0	0	0	0	0	0	0	0	0	0	0	0	0	0	0	0
b1699	ydiS putative flavoprotein	0	0	0	0	0	0	0	0	0	0	0	0	0	0	0	0	0
b1700	ydiT putative ferredoxin	0	ND	0	ND	0	0	0	0	0	0	0	ND	0	0	0	0	ND
b1701	fadK FadK monomer	0	0	0	0	0	0	0	0	0	0	0	0	0	0	0	0	0
b1702	pps PpsA	0	0	0	0	0	0	0	0	0	0	0	0	0	0	0	0	0
b1703	ydiA conserved protein	0	0	0	0	0	0	0	0	0	0	0	0	0	0	0	0	0
b1704	aroH 2-dehydro-3-deoxyphosphoheptonate aldolase	0	0	0	0	1.7747	0	0	0	0	0	0	0	0	0	0	0	0
b1705	ydiE conserved protein	0	0	0	0	0	0	0	0	0	0	0	0	0	0	0	0	0
b1706	ydiU conserved protein	0	0	0	0	0	0	0	0	0	0	0	0	0	0	0	0	0
b1707	ydiV conserved protein	ND	ND	ND	ND	0	ND	0	ND	0	0	ND	ND	0	0	ND	0	ND
b1708	nlpC NlpC-putative lipoprotein hydrolase	0	0	0	0	0	0	0	0	0	0	0	0	0	0	0	0	0
b1709	btuD vitamin B12 transport system	0	0	0	0	0	0	0	0	0	0	0	0	0	0	0	0	0
b1710	btuE predicted glutathione peroxidase	0	0	0	0	0	0	0	0	0	0	0	0	0	0	0	0	0
b1711	btuC vitamin B12 transport system	0	0	0	0	0	0	0	0	0	0	0	0	0	0	0	0	0
b1712	ihfA IHF transcriptional dual regulator	ND	0	0	0	0	0	0	0	0	0	0	0	0	0	0	0	0
b1713	pheT phenylalanyl-tRNA synthetase beta;-chain	0	0	0	ND	0	0	0	0	0	0	0	0	0	0	0	0	0
b1714	pheS phenylalanyl-tRNA synthetase alpha;-chain	0	0	0	0	0	0	0	0	0	0	0	0	0	0	0	0	0
b1716	rplT 50S ribosomal subunit protein L20	ND	ND	ND	0	0	0	0	0	0	0	0	0	0	0	0	0	0
b1717	rpmI 50S ribosomal subunit protein L35	0	0	0	ND	0	0	0	0	0	0	0	ND	0	0	0	0	0
b1718	infC protein chain initiation factor IF-3	0	0	ND	0	0	0	0	0	ND	ND	0	0	ND	ND	0	ND	0
b1719	thrS threonyl-tRNA synthetase	0	0	0	0	0	0	0	0	0	0	0	0	0	0	0	0	0
b1720	b1720	0	0	0	0	0	0	0	0	0	0	0	0	0	0	0	0	0
b1721	b1721	0	0	0	0	0	0	0	0	0	0	0	0	0	0	0	0	0
b1722	ydiY conserved protein	-2.33568	-2.40984	0	-4.17533	0	0	0	0	0	0	0	0	0	0	0	0	0
b1723	pfkB 6-phosphofructokinase-2 monomer	0	0	0	0	0	0	0	0	0	0	0	0	0	0	0	0	0
b1724	ydiZ predicted protein	0	ND	ND	0	0	0	0	0	0	0	0	0	0	0	0	0	0
b1725	yniA predicted phosphotransferase/kinase	0	0	0	0	2.0189	0	0	0	0	0	0	0	0	0	0	0	0
b1726	yniB predicted inner membrane protein	0	0	0	0	0	0	0	0	0	0	0	0	0	0	0	0	0
b1728	ydjM predicted inner membrane protein regulated by LexA	0	0	0	-2.35284	0	0	0	0	0	0	0	0	0	0	0	0	0
b1729	ydjN predicted transporter	0	0	0	-2.6561	0	0	0	0	0	0	0	0	0	0	0	0	0
b1730	ydjO predicted protein	0	0	0	0	0	0	0	0	0	0	0	0	0	0	0	0	0
b1731	cedA cell division modulator	0	0	0	0	0	0	0	0	0	0	0	0	0	0	0	0	0
b1732	katE heme d synthase / hydroperoxidase	0	0	0	0	0	0	0	0	0	0	0	0	0	0	0	0	0
b1733	chbG conserved protein	0	0	0	0	0	0	0	0	0	0	0	0	0	0	0	0	0
b1734	chbF diacetylchitobiose-6-phosphate hydrolase	ND	0	ND	0	0	0	0	0	0	0	0	0	0	0	0	0	0
b1735	chbR ChbR transcriptional dual regulator	ND	ND	ND	-2.33229	0	0	0	0	0	0	0	0	0	0	0	0	0
b1736	chbA EIIChb	0	0	0	0	0	0	0	0	0	0	0	0	0	0	0	0	0
b1737	chbC EIIChb	0	0	0	-3.41018	0	0	0	0	0	0	0	0	0	0	0	0	0
b1738	chbB EIIChb	ND	ND	ND	0	0	0	0	0	0	0	0	0	0	0	0	0	0
b1739	osmE OsmE-osmotically inducible protein	0	ND	ND	0	0	0	0	0	0	ND	0	0	0	0	0	0	0
b1740	nadE NAD+ synthase, glutamine dependent / NAD+ synthase, NH3-dependent	0	0	0	0	0	0	0	0	0	0	0	0	0	0	0	0	0
b1741	cho endonuclease of nucleotide excision repair	0	0	0	0	0	0	0	0	0	0	0	0	0	0	0	0	0
b1742	ves conserved protein	0	0	0	0	0	0	0	0	0	0	0	0	0	0	0	0	0
b1743	spy periplasmic protein related to spheroblast formation	0	0	0	0	0	0	0	0	0	0	0	0	0	0	0	0	0
b1744	astE succinylglutamate desuccinylase	0	0	0	0	0	0	0	0	0	0	0	0	0	0	0	0	0
b1745	astB succinylarginine dihydrolase	0	ND	0	ND	0	0	0	0	0	0	0	ND	0	0	0	0	ND
b1746	astD aldehyde dehydrogenase	0	0	0	0	0	0	0	0	0	0	0	0	0	0	0	0	0
b1747	astA arginine succinyltransferase	0	0	0	0	0	0	0	0	0	0	0	0	0	0	0	0	0
b1749	xthA exonuclease III	0	0	0	0	0	0	0	0	0	0	0	0	0	0	0	0	0
b1750	ydjX predicted inner membrane protein	0	0	0	0	0	0	0	0	0	0	0	0	0	0	0	0	0
b1751	ydjY predicted protein	0	0	0	0	0	0	0	0	0	0	0	0	0	0	0	0	0
b1752	ydjZ conserved inner membrane protein	0	0	0	0	0	0	0	0	0	0	0	0	0	0	0	0	0
b1753	ynjA conserved protein	0	0	0	0	0	0	0	0	0	0	0	0	0	0	0	0	0
b1754	ynjB conserved protein	0	0	0	0	0	0	0	0	0	0	0	0	0	0	0	0	0
b1755	ynjC YnjC/YnjD ABC transporter	0	0	0	0	0	0	0	0	0	0	0	0	0	0	0	0	0
b1756	ynjD YnjC/YnjD ABC transporter	0	ND	ND	ND	0	0	0	0	0	0	0	ND	0	0	0	0	ND
b1757	ynjE predicted thiosulfate sulfur transferase	0	0	0	0	0	0	0	0	0	0	0	0	0	0	0	0	0
b1758	ynjF predicted phosphatidyl transferase, inner membrane protein	0	0	0	0	0	0	0	0	0	0	0	0	0	0	0	0	0
b1760	ynjH predicted protein	0	0	0	0	0	0	0	0	0	0	0	0	0	0	0	0	0
b1761	gdhA glutamate dehydrogenase	0	0	0	0	0	0	0	0	0	0	0	0	0	0	0	0	0
b1762	ynjI predicted inner membrane protein	-2.30154	0	0	0	0	0	0	0	0	0	0	0	0	0	0	0	0
b1763	topB DNA topoisomerase III	0	0	0	0	0	0	0	0	0	0	0	0	0	0	0	0	0
b1764	selD selenide, water dikinase	0	0	0	0	0	0	0	0	0	0	0	0	0	0	0	0	0
b1765	ydjA predicted oxidoreductase	0	0	0	0	0	0	0	0	0	0	0	0	0	0	0	0	0
b1766	sppA protease IV, a signal peptide peptidase	0	0	0	0	0	0	0	0	0	0	0	0	0	0	0	0	0
b1767	ansA asparaginase I	0	0	0	0	0	0	0	0	0	0	0	0	0	0	0	0	0
b1768	pncA pyrazinamidase / nicotinamidase	0	0	0	-3.48494	0	0	0	0	0	0	0	0	0	0	0	0	0
b1769	ydjE YdjE MFS transporter	0	0	0	-3.12753	0	0	0	0	0	0	0	0	0	0	0	0	0
b1770	ydjF predicted DNA-binding transcriptional regulator	-2.31366	0	0	-3.81142	0	0	0	0	0	-2.24929	0	0	0	0	0	0	0
b1771	ydjG methylglyoxal reductase (NADH-dependent)	0	0	0	-2.81541	0	0	0	0	0	0	0	0	0	0	0	0	0
b1772	ydjH predicted kinase	0	0	ND	0	0	0	0	0	0	0	0	0	ND	0	0	0	0
b1773	ydjI predicted aldolase	0	0	0	0	0	0	0	0	0	0	0	0	0	0	0	0	0
b1775	ydjK predicted transporter	0	0	0	-4.91559	0	0	0	0	0	0	0	0	0	0	0	0	0
b1776	ydjL predicted oxidoreductase, Zn-dependent and NAD(P)-binding	0	0	0	0	0	0	0	0	0	0	0	0	0	0	0	0	0
b1777	yeaC conserved protein	0	0	0	0	0	0	0	0	0	0	0	0	0	0	0	0	0
b1778	msrB methionine sulfoxide reductase B	0	0	0	0	0	0	0	0	0	0	0	0	0	0	0	0	0
b1779	gapA glyceraldehyde 3-phosphate dehydrogenase-A monomer	0	0	0	0	0	0	0	0	0	0	0	0	0	0	0	0	0
b1780	yeaD conserved protein	0	0	0	0	0	0	0	0	0	0	0	0	0	0	0	0	0
b1781	yeaE methylglyoxal reductase	0	0	ND	0	0	0	0	0	0	0	0	0	0	0	0	0	0
b1782	mipA scaffolding protein that interacts with murein polymerase and murein hydrolase	0	0	0	0	0	0	0	0	0	0	0	0	0	0	0	0	0
b1783	yeaG conserved protein	0	0	0	0	0	0	0	0	0	0	0	0	0	0	0	0	0
b1784	yeaH conserved protein	0	0	0	-2.41005	0	0	0	0	0	0	0	0	0	0	0	0	0
b1785	yeaI predicted diguanylate cyclase	0	0	0	0	0	0	0	0	0	0	0	0	0	0	0	0	0
b1786	yeaJ predicted diguanylate cyclase	0	0	0	-2.97457	0	0	0	0	0	0	0	0	0	0	0	0	0
b1787	yeaK conserved protein	0	0	0	0	0	0	0	0	0	0	0	0	0	0	0	0	0
b1788	yoaI predicted protein	0	ND	0	0	0	0	0	0	0	0	0	0	0	0	0	0	0
b1789	yeaL conserved inner membrane protein	0	0	0	0	0	0	0	0	0	0	0	0	0	0	0	0	0
b1790	yeaM predicted DNA-binding transcriptional regulator	0	0	0	0	0	0	0	0	0	0	0	0	0	0	0	0	0
b1791	yeaN putative amino acid/amine MFS transporter	0	0	0	0	0	0	0	0	0	0	0	0	0	0	0	0	0
b1792	yeaO conserved protein	0	0	0	0	0	0	0	0	0	0	0	0	0	0	0	0	0
b1793	yoaF putative lipoprotein	0	0	0	0	0	0	0	0	0	0	0	0	0	0	0	0	0
b1794	yeaP predicted diguanylate cyclase	0	0	0	0	0	0	0	0	0	0	0	0	0	0	0	0	0
b1795	yeaQ conserved inner membrane protein	0	0	0	0	0	0	0	0	0	0	0	0	0	0	0	0	0
b1796	yoaG predicted protein	0	0	0	0	0	0	0	0	0	0	0	0	0	0	0	0	0
b1797	yeaR conserved protein	0	0	0	-3.63733	0	0	0	0	0	0	0	0	0	0	0	0	0
b1798	leuE leucine export protein	0	ND	0	ND	0	0	0	0	0	0	0	ND	0	0	0	0	ND
b1799	yeaT predicted DNA-binding transcriptional regulator	0	0	0	-3.88186	0	0	0	0	0	0	0	0	0	0	0	0	0
b1800	yeaU D-malate dehydrogenase (decarboxylating)	0	0	0	0	0	0	0	0	0	0	0	0	0	0	0	0	0
b1801	yeaV predicted transporter	0	0	0	0	0	0	0	0	0	0	0	0	0	0	0	0	0
b1802	yeaW predicted 2Fe-2S cluster-containing protein	0	0	0	0	0	0	0	0	0	0	0	0	0	0	0	0	0
b1803	yeaX predicted oxidoreductase	0	0	0	0	0	0	0	0	0	0	0	0	0	0	0	0	0
b1804	rnd RNase D	0	0	0	0	0	0	0	0	0	0	0	0	0	0	0	0	0
b1805	fadD fatty acyl-CoA synthetase	0	0	0	0	0	0	0	0	0	0	0	0	0	0	0	0	0
b1806	yeaY predicted lipoprotein	0	0	0	0	0	0	0	0	0	0	0	0	0	0	0	0	0
b1807	yeaZ predicted peptidase	0	0	0	0	0	0	0	0	0	0	0	0	0	0	0	0	0
b1808	yoaA conserved protein	0	0	0	0	0	0	0	0	0	0	0	0	0	0	0	0	0
b1809	yoaB conserved protein	0	0	0	0	0	0	0	0	0	0	0	0	0	0	0	0	0
b1810	yoaC predicted protein	0	0	0	0	0	0	0	0	0	0	0	0	0	0	0	0	0
b1811	yoaH conserved protein	0	0	0	0	0	0	0	0	0	0	0	0	0	0	0	0	0
b1812	pabB para-aminobenzoate synthase multi-enzyme complex	0	0	0	0	0	2.75021	0	0	0	0	0	0	0	0	0	0	0
b1813	nudL predicted NUDIX hydrolase	0	0	0	-2.21112	0	0	0	0	0	0	0	0	0	0	0	0	0
b1814	sdaA L-serine deaminase I	0	0	0	0	0	0	0	0	0	0	0	0	0	0	0	0	0
b1817	manX mannose PTS permease	0	0	0	0	0	0	0	0	0	0	0	0	0	0	0	0	0
b1818	manY mannose PTS permease	0	0	0	0	0	0	0	0	0	0	0	0	0	0	0	0	0
b1819	manZ mannose PTS permease	0	0	0	0	0	0	0	0	0	0	0	0	0	0	0	0	0
b1820	yobD conserved inner membrane protein	0	0	0	-2.41735	0	-2.15398	0	0	0	0	0	0	0	0	0	0	0
b1821	yebN conserved inner membrane protein	0	0	0	0	0	0	0	0	0	0	0	0	0	0	0	0	0
b1822	rrmA 23S rRNA m1G745 methyltransferase	0	ND	0	ND	0	0	0	0	0	0	0	ND	0	0	0	0	ND
b1824	yobF predicted protein	0	0	ND	0	0	0	0	0	0	0	0	0	0	0	0	0	0
b1825	yebO predicted protein	-2.19164	0	-2.16948	0	0	0	0	0	0	0	0	0	0	0	0	0	0
b1826	mgrB predicted protein	0	0	ND	0	0	0	0	0	0	0	0	0	0	0	0	0	0
b1827	kdgR KdgR transcriptional repressor	0	0	0	0	0	0	0	0	0	0	0	0	0	0	0	0	0
b1828	yebQ predicted transporter	0	0	ND	ND	0	0	0	0	0	0	0	0	0	0	0	0	0
b1829	htpX heat shock protein, integral membrane protein	0	0	0	0	0	0	0	0	0	0	0	0	0	0	0	0	0
b1830	prc tail-specific protease	0	0	0	0	0	0	0	0	0	0	0	0	0	0	2.97576	0	0
b1831	proQ predicted structural transport element	0	ND	ND	0	0	0	0	0	0	0	0	0	0	0	0	0	0
b1832	yebR methionine-(R)-sulfoxide reductase	0	0	0	0	0	0	0	0	0	0	0	0	0	0	0	0	0
b1833	yebS conserved inner membrane protein	0	0	0	0	0	0	0	0	0	0	0	0	0	0	0	0	0
b1834	yebT conserved protein	0	0	0	0	0	0	0	0	0	0	0	0	0	0	0	0	0
b1835	rsmF 16S rRNA m 5C1407 methyltransferase	0	0	0	0	0	0	0	0	0	0	0	0	0	0	0	0	0
b1836	yebV predicted protein	0	0	ND	0	0	0	0	0	0	0	0	0	0	0	0	0	0
b1837	yebW predicted protein	0	0	0	0	0	0	0	0	0	0	0	0	0	0	0	0	0
b1838	pphA protein phosphatase 1 modulates phosphoproteins, signals protein misfolding	0	0	0	0	0	0	0	0	0	0	0	0	0	0	0	0	0
b1839	yebY predicted protein	0	0	0	0	0	0	0	0	0	0	0	0	0	0	0	0	0
b1840	yebZ putative resistance protein	0	0	-2.87653	-2.99252	0	0	0	0	0	0	0	0	-2.67291	0	0	0	0
b1841	yobA conserved protein	0	0	0	0	0	0	0	0	0	0	0	0	0	0	0	0	0
b1842	holE DNA polymerase III, theta; subunit	0	0	0	0	0	0	0	0	0	0	0	0	0	0	0	0	0
b1843	yobB conserved protein	0	0	0	0	0	0	0	0	0	0	0	0	0	0	0	0	0
b1845	ptrB protease II	0	0	0	0	0	0	0	0	0	0	0	0	0	0	0	0	0
b1846	yebE conserved protein	0	0	0	0	0	0	0	0	0	0	0	0	0	0	0	0	0
b1847	yebF predicted protein	0	0	0	0	0	0	0	0	0	0	0	0	0	0	0	0	0
b1848	yebG conserved protein regulated by LexA	0	0	0	0	0	0	0	0	0	0	0	0	0	0	0	0	0
b1849	purT GAR transformylase 2	0	0	0	0	0	0	0	0	0	0	0	0	0	0	0	0	0
b1850	eda oxaloacetate decarboxylase [multifunctional]	0	0	0	0	0	0	0	0	0	0	0	0	0	0	0	0	0
b1851	edd phosphogluconate dehydratase	0	0	0	0	0	0	0	0	0	0	0	0	0	0	0	0	0
b1852	zwf glucose 6-phosphate-1-dehydrogenase	0	0	0	0	0	0	0	0	0	0	0	0	0	0	2.37951	0	0
b1854	pykA pyruvate kinase II monomer	0	0	0	0	0	0	0	0	0	0	0	0	0	0	0	0	0
b1855	lpxM myristoyl-acyl carrier protein (ACP)-dependent acyltransferase	0	0	0	0	0	0	0	0	0	0	0	0	0	0	0	0	0
b1856	yebA predicted peptidase	0	0	0	0	0	0	0	0	0	0	0	0	0	0	0	0	0
b1857	znuA ZnuA/ZnuB/ZnuC ABC transporter	0	0	0	0	0	0	0	0	0	0	0	0	0	0	0	0	0
b1858	znuC ZnuA/ZnuB/ZnuC ABC transporter	0	0	0	0	0	0	0	0	0	0	0	0	0	0	0	0	0
b1860	ruvB branch migration of Holliday structures; repair helicase	0	0	0	0	0	0	0	0	0	0	0	0	0	0	0	0	0
b1861	ruvA branch migration of Holliday structures; repair	0	0	0	0	-1.71731	-2.26515	0	0	0	0	0	0	0	0	0	0	0
b1863	ruvC Holliday junction nuclease; resolution of structures; repair	0	0	0	0	0	0	0	0	0	0	0	0	0	0	0	0	0
b1864	yebC conserved protein	0	0	0	0	0	0	0	0	0	0	0	0	0	0	0	0	0
b1865	nudB dihydroneopterin triphosphate pyrophosphohydrolase	0	0	0	0	0	0	0	0	0	0	0	0	0	0	0	0	0
b1866	aspS aspartyl-tRNA synthetase	0	0	0	0	0	0	0	0	0	0	0	0	0	0	0	0	0
b1867	yecD predicted hydrolase	0	0	0	0	0	0	0	0	0	0	0	0	0	0	0	0	0
b1868	yecE conserved protein	0	0	0	0	0	0	0	0	0	0	0	0	0	0	0	0	0
b1869	yecN predicted inner membrane protein	0	0	0	0	0	0	0	0	0	0	0	0	0	0	0	0	0
b1870	cmoA predicted methyltransferase	0	0	0	0	0	0	0	0	0	0	0	0	0	0	0	0	0
b1871	cmoB predicted S-adenosyl-L-methionine-dependent methyltransferase	0	0	0	0	0	0	0	0	0	0	0	0	0	0	0	0	0
b1873	torY trimethylamine N-oxide reductase III, c-type cytochrome subunit	0	0	0	0	0	0	0	0	0	0	0	0	0	0	0	0	0
b1874	cutC copper homeostasis protein	0	0	0	ND	0	0	0	0	0	0	0	0	0	0	0	0	0
b1875	yecM predicted metal-binding enzyme	0	ND	0	ND	0	0	0	0	0	0	0	ND	0	0	0	0	ND
b1876	argS arginyl-tRNA synthetase	0	0	0	0	0	0	0	0	0	0	0	0	0	0	0	0	0
b1877	yecT predicted protein	0	0	ND	0	0	0	0	0	0	0	0	0	0	0	0	0	0
b1879	flhA flagellar biosynthesis protein FlhA	0	0	0	0	0	0	0	0	0	0	2.23078	0	0	0	0	0	0
b1880	flhB flagellar biosynthesis protein FlhB	0	0	0	-2.53903	0	0	0	0	0	0	2.30512	0	0	0	2.2385	0	0
b1881	cheZ CheZ	0	0	0	ND	0	0	0	0	0	0	0	0	0	0	0	0	0
b1882	cheY CheY-P asp	0	0	0	0	0	0	0	0	0	0	0	0	0	0	0	0	0
b1883	cheB CheB-P asp	0	0	0	0	0	0	0	0	0	0	0	0	0	0	0	0	0
b1884	cheR chemotaxis protein methyltransferase	0	0	0	0	0	0	0	0	0	0	0	0	0	0	0	0	0
b1885	tap MCP-IV	0	0	0	0	0	0	0	0	0	0	0	0	0	0	0	0	0
b1886	tar MCP-II	0	0	0	0	0	0	0	0	0	0	0	0	0	0	0	0	0
b1887	cheW MCP-II	0	0	0	0	0	0	0	0	0	0	0	0	0	0	0	0	0
b1888	cheA CheA(S)	0	0	0	0	0	0	0	0	0	0	0	0	0	0	0	0	0
b1889	motB MotB protein, enables flagellar motor rotation, linking torque machinery to cell wall	0	0	0	0	0	0	0	0	0	0	0	0	0	0	0	0	0
b1890	motA MotA protein, proton conductor component of motor; no effect on switching	0	0	0	0	0	0	0	0	0	0	0	0	0	0	0	0	0
b1891	flhC FlhDC transcriptional dual regulator	0	0	0	0	0	0	0	0	0	2.34999	2.6323	0	0	1.61841	2.84847	0	0
b1892	flhD FlhDC transcriptional dual regulator	ND	0	ND	0	0	0	0	0	0	0	2.23592	0	0	2.25651	2.73121	0	0
b1893	insB-5 IS1 protein InsB	0	ND	0	ND	0	0	0	0	0	0	0	ND	0	0	0	0	ND
b1894	insA-5 IS1 protein InsA	ND	ND	ND	0	0	0	0	0	0	0	0	0	0	0	0	0	0
b1895	uspC universal stress protein	0	0	0	0	0	0	0	0	0	0	0	0	0	0	0	0	0
b1896	otsA trehalose-6-phosphate synthase	0	0	ND	-2.95177	0	0	0	0	0	0	0	0	0	0	0	0	0
b1897	otsB trehalose-6-phosphate phosphatase, biosynthetic	0	0	0	0	0	0	0	0	0	0	0	0	0	0	0	0	0
b1898	araH	0	ND	0	0	0	0	0	0	0	0	0	0	0	0	0	0	0
b1899	b1899	0	0	0	0	0	0	0	0	0	0	0	0	0	0	0	0	0
b1900	araG arabinose ABC transporter	0	0	0	0	0	0	0	0	0	0	0	0	0	0	0	0	0
b1901	araF arabinose ABC transporter	0	0	0	0	0	0	0	0	0	0	0	0	0	0	0	0	0
b1902	ftnB predicted ferritin-like protein	0	0	0	0	0	0	0	0	0	0	0	0	0	0	0	0	0
b1903	b1903	0	ND	0	ND	0	0	0	0	0	0	0	ND	0	0	0	0	ND
b1904	yecR predicted protein	0	-2.27057	-2.36318	-3.5817	-2.36236	0	0	0	0	0	-2.62141	0	0	0	0	0	0
b1905	ftnA cytoplasmic ferritin, an iron storage protein)	0	0	ND	-2.45271	0	0	0	0	0	0	0	0	0	0	0	0	0
b1906	yecH predicted protein	0	0	0	0	0	0	0	0	0	0	0	0	0	0	0	0	0
b1907	tyrP tyrosine ArAAP transporter	0	0	0	0	0	0	0	0	0	0	0	0	0	0	0	0	0
b1908	yecA putative protein translocase subunit	0	0	0	0	0	0	0	0	0	0	0	0	0	0	0	0	0
b1912	pgsA phosphatidylglycerophosphate synthase	0	0	0	0	0	0	0	0	0	0	0	0	0	0	0	0	0
b1913	uvrC excinuclease ABC, subunit C; repair of UV damage to DNA	0	0	0	-3.32413	0	0	0	0	0	0	0	0	0	0	0	0	0
b1914	uvrY UvrY- Phosphorylated transcriptional regulator	0	0	0	0	0	0	0	0	0	0	0	0	0	0	0	0	0
b1915	yecF predicted protein	0	0	0	0	0	0	0	0	0	0	0	0	0	0	0	0	0
b1916	sdiA SdiA transcriptional dual regulator	0	0	0	0	0	0	0	0	0	0	0	0	0	0	0	0	0
b1917	yecC predicted transporter subunit: ATP-binding component of ABC superfamily	0	0	0	0	0	0	0	0	0	0	0	0	0	0	0	0	0
b1918	yecS predicted transporter subunit: membrane component of ABC superfamily	0	0	0	0	0	0	0	0	0	0	0	0	0	0	0	0	0
b1919	dcyD D-cysteine desulfhydrase monomer	0	0	0	0	0	0	0	0	0	0	0	0	0	0	0	0	0
b1920	fliY periplasmic cystine-binding protein; member of extracellular bacterial solute-binding protein family III	0	0	0	0	0	0	0	0	0	0	0	0	0	0	0	0	0
b1921	fliZ predicted regulator of FliA activity	0	0	0	0	0	0	0	0	0	0	0	0	0	1.96688	2.33808	0	0
b1922	fliA RNA polymerase, sigma 28 (sigma F) factor	0	0	0	0	0	0	0	0	0	0	0	0	0	0	2.84383	0	0
b1923	fliC flagellar biosynthesis; flagellin, filament structural protein	0	0	0	0	0	0	0	0	0	0	0	0	0	0	0	0	0
b1924	fliD flagellar cap protein FliD; filament capping protein; enables filament assembly	0	0	0	0	0	0	0	0	0	0	0	0	0	0	-2.24285	0	0
b1925	fliS flagellar biosynthesis protein FliS	0	ND	ND	0	0	0	0	0	0	0	0	0	0	0	0	0	0
b1926	fliT flagellar biosynthesis protein FliT	0	0	ND	0	0	0	0	0	0	0	0	0	0	0	0	0	0
b1927	amyA alpha;-amylase	0	ND	ND	0	0	0	0	0	0	0	0	0	0	0	0	0	0
b1928	yedD predicted protein	0	0	0	0	0	0	0	0	0	0	0	0	0	0	0	0	0
b1929	yedE predicted inner membrane protein	0	0	0	0	0	0	0	0	0	0	0	0	0	0	0	0	0
b1931	yedK predicted protein	0	0	0	0	0	0	0	0	0	0	0	0	0	0	0	0	0
b1932	yedL predicted acyltransferase	0	0	0	ND	0	0	0	0	0	0	0	0	0	0	0	0	0
b1935	yedM conserved protein	ND	0	ND	0	0	0	0	0	0	0	0	0	0	0	0	0	0
b1936	intG	0	0	ND	0	0	0	0	0	0	0	0	0	0	0	0	0	0
b1937	fliE flagellar basal-body protein FliE	0	0	0	0	0	0	0	0	0	0	0	0	0	0	0	0	0
b1938	fliF flagellar M-ring protein FliF; basal-body MS(membrane and supramembrane)-ring and collar protein	0	0	0	0	0	0	0	0	0	0	0	0	0	0	0	0	0
b1939	fliG flagellar motor switch protein FliG	0	0	0	0	0	0	0	0	0	0	0	0	0	2.07822	0	0	0
b1940	fliH flagellar biosynthesis protein FliH	0	0	0	0	0	0	0	0	0	0	2.50369	0	0	0	2.5464	0	0
b1941	fliI flagellum-specific ATP synthase FliI	0	0	0	0	0	0	0	0	0	0	3.38369	0	0	0	0	0	0
b1943	fliK flagellar hook-length control protein FliK	0	0	0	0	0	0	0	0	0	0	0	0	0	0	0	0	0
b1944	fliL flagellar biosynthesis	0	0	ND	0	0	0	0	0	0	0	0	0	0	0	0	0	0
b1945	fliM flagellar motor switch protein FliM	0	0	0	0	0	0	0	0	0	0	0	0	0	0	0	0	0
b1946	fliN flagellar motor switch protein FliN	0	0	0	0	0	0	0	0	0	0	3.79634	0	0	2.11626	2.97061	0	0
b1947	fliO flagellar biosynthesis protein FliO	0	ND	0	0	0	0	0	0	0	0	0	0	0	0	0	0	0
b1948	fliP flagellar biosynthesis protein FliP	0	0	0	0	0	0	0	0	0	0	0	0	0	0	0	0	0
b1949	fliQ flagellar biosynthesis protein FliQ	0	ND	ND	0	0	0	0	0	0	0	0	0	0	0	0	0	0
b1950	fliR flagellar biosynthesis protein FliR	0	0	0	0	0	0	0	0	0	0	2.17978	0	0	0	0	0	0
b1951	rcsA positive DNA-binding transcriptional regulator of capsular polysaccharide synthesis, activates its own expression	ND	ND	ND	0	0	0	0	0	0	0	0	0	0	0	0	0	0
b1952	dsrB hypothetical protein; transcription is regulated by RpoS and DsrA RNA	0	0	ND	0	0	0	0	0	0	0	0	0	0	0	0	0	0
b1953	yodD predicted protein	0	0	0	0	0	0	0	0	0	0	0	0	0	0	0	0	0
b1955	yedP predicted phosphatase	0	0	0	0	0	0	0	0	0	0	0	0	0	0	0	0	0
b1956	yedQ predicted diguanylate cyclase	0	0	0	0	0	0	0	0	0	0	0	0	0	0	0	0	0
b1957	yodC predicted protein	0	0	0	0	0	0	0	0	0	0	0	0	0	0	0	0	0
b1959	yedA putative transmembrane subunit	0	0	0	0	0	0	0	0	0	0	0	0	0	0	0	0	0
b1960	vsr DNA mismatch endonuclease of the very short patch (VSP) mismatch repair pathway	0	0	0	0	0	0	0	0	0	0	0	0	0	0	0	0	0
b1961	dcm DNA cytosine methylase	0	0	0	0	0	0	0	0	0	0	0	0	0	0	0	0	0
b1962	yedJ predicted phosphohydrolase	0	0	0	0	0	0	0	0	0	0	0	0	0	0	0	0	0
b1963	yedR predicted inner membrane protein	0	0	0	0	0	0	0	0	0	0	0	0	0	0	0	0	0
b1964	b1964	0	0	0	-2.3003	0	0	0	0	0	0	0	0	0	0	0	0	0
b1965	b1965	0	0	ND	0	0	0	0	0	0	0	0	0	0	0	0	0	0
b1966	b1966	0	0	0	0	0	0	0	0	0	0	0	0	0	0	0	0	0
b1967	hchA heat shock protein (Hsp) 31	0	0	0	-2.33508	0	0	0	0	0	0	0	0	0	0	0	0	0
b1968	yedV predicted sensory kinase in two-component regulatory system with YedW	0	0	0	0	0	0	0	0	0	0	0	0	0	0	0	0	0
b1969	yedW predicted DNA-binding response regulator in two-component system with YedV	0	0	0	-3.01265	0	0	0	0	0	0	0	0	0	0	0	0	0
b1970	yedX conserved protein	0	0	0	0	0	0	0	0	0	0	0	ND	0	0	0	0	ND
b1971	yedY reductase	0	0	0	0	0	0	0	0	0	0	0	0	0	0	0	0	0
b1972	yedZ conserved inner membrane protein	0	0	0	0	0	0	0	0	0	0	0	0	0	0	0	0	0
b1973	yodA cadmium-induced cadmium binding protein	0	0	0	0	0	0	0	0	0	0	0	0	0	0	0	0	0
b1974	yodB predicted cytochrome	0	ND	0	ND	0	0	0	0	0	0	0	0	0	0	0	0	0
b1976	mtfA Mlc titration factor	0	-2.78557	0	-2.40566	0	0	0	0	0	0	0	0	0	0	-2.61799	0	0
b1978	yeeJ adhesin	0	0	0	0	0	0	0	0	0	0	0	0	0	0	0	0	0
b1979	b1979	0	0	0	0	0	0	0	0	0	0	0	0	0	0	0	0	0
b1980	b1980	0	0	0	0	0	0	0	0	0	0	0	0	0	0	0	0	0
b1981	shiA ShiA shikimate MFS transporter	0	ND	ND	0	0	0	0	0	0	0	0	0	0	0	0	0	0
b1982	amn AMP nucleosidase	0	0	0	0	0	0	0	0	0	0	0	0	0	0	0	0	0
b1983	yeeN conserved protein	0	0	0	0	0	0	0	0	0	0	0	0	0	0	0	0	0
b1985	yeeO YeeO MATE Transporter	-2.31673	0	0	0	0	0	0	0	0	0	0	0	0	0	0	0	0
b1988	nac Nac transcriptional dual regulator	0	0	0	0	0	0	0	0	0	0	0	0	0	0	0	0	0
b1990	erfK conserved protein with NAD(P)-binding Rossmann-fold domain	0	0	-2.20844	0	0	0	0	0	0	0	0	0	0	0	0	0	0
b1991	cobT nicotinate-nucleotide dimethylbenzimidazole phosphoribosyltransferase	0	0	-3.3871	-2.9133	0	0	0	0	0	0	0	0	0	0	0	0	0
b1992	cobS cobalamin 5'-phosphate synthase / cobalamin synthase	0	0	0	0	0	0	0	0	0	0	0	0	0	0	0	0	0
b1993	cobU cobinamide-P guanylyltransferase / cobinamide kinase	0	0	0	0	0	0	0	0	0	0	0	0	0	0	0	0	0
b1994	insH-6 IS5 transposase and trans-activator	0	0	0	-2.89017	0	0	0	0	0	0	0	0	0	0	0	0	0
b1995	yoeA CP4-44 prophage; predicted disrupted hemin or colicin receptor	0	0	ND	0	0	0	0	0	0	0	0	0	0	0	0	0	0
b1996	insD-3 IS2 element protein	0	0	0	-4.0078	0	0	0	0	0	0	0	0	0	0	0	0	0
b1997	insC-3 IS2 element protein InsA	0	0	0	-3.96378	0	0	0	0	0	0	0	0	0	0	0	0	0
b1998	yoeE hypothetical protein	ND	0	ND	0	0	0	0	0	0	0	0	0	0	0	0	0	0
b1999	yeeP CP4-44 prophage; predicted GTP-binding protein	0	0	0	0	0	0	0	0	0	0	0	0	0	0	0	0	0
b2000	flu CP4-44 prophage; antigen 43 (Ag43) phase-variable biofilm formation autotransporter	0	0	0	0	0	0	0	0	0	0	0	0	0	0	0	0	0
b2001	yeeR CP4-44 prophage; predicted membrane protein	0	0	0	0	0	0	0	0	0	0	0	0	0	0	0	0	0
b2002	yeeS CP4-44 prophage; predicted DNA repair protein	0	0	0	0	0	0	0	0	0	0	0	0	0	0	0	0	0
b2003	yeeT CP4-44 prophage; predicted protein	0	0	0	0	0	0	0	0	0	0	0	0	0	0	0	0	0
b2004	yeeU CP4-44 prophage; antitoxin of the YeeV-YeeU toxin-antitoxin system	0	0	0	0	0	0	0	0	0	0	0	0	0	0	0	0	0
b2005	yeeV CP4-44 prophage; toxin of the YeeV-YeeU toxin-antitoxin system	0	0	0	0	0	0	0	0	0	0	0	0	0	0	0	0	0
b2006	yeeW CP4-44 prophage; predicted protein	0	0	0	0	0	0	0	0	0	0	0	0	0	0	0	0	0
b2007	yeeX conserved protein	ND	0	ND	0	0	0	0	0	0	0	0	0	0	0	0	0	0
b2008	yeeA conserved inner membrane protein	0	0	0	0	0	0	0	0	0	0	0	0	0	0	0	0	0
b2009	sbmC DNA gyrase inhibitor	0	0	0	0	0	0	0	0	0	0	0	0	0	0	0	0	0
b2010	dacD DD-carboxypeptidase, penicillin-binding protein 6b	0	0	0	0	0	0	0	0	0	0	0	0	0	0	0	0	0
b2011	sbcB exonuclease I, 3' --> 5' specific; deoxyribophosphodiesterase	0	0	0	0	0	0	0	0	0	0	0	0	0	0	0	0	0
b2012	yeeD conserved protein	0	0	0	0	0	0	0	0	0	0	0	0	0	0	0	0	0
b2013	yeeE putative transport system permease protein	0	0	0	0	0	0	0	0	0	0	0	0	0	0	0	0	0
b2014	yeeF YeeF amino acid APC transporter	0	0	0	0	0	0	0	0	0	0	0	0	0	0	0	0	0
b2015	yeeY predicted DNA-binding transcriptional regulator	0	0	0	0	0	0	0	0	0	0	0	0	0	0	0	0	0
b2016	yeeZ predicted epimerase, with NAD(P)-binding Rossmann-fold domain	0	0	0	0	0	0	0	0	0	0	0	0	0	0	0	0	0
b2017	yefM antitoxin of the YoeB-YefM toxin-antitoxin pair	0	0	0	0	0	0	0	0	0	0	0	0	0	0	0	0	0
b2019	hisG ATP phosphoribosyltransferase	0	0	0	0	0	0	0	0	0	0	0	0	0	0	0	0	0
b2021	hisC histidinol-phosphate aminotransferase	0	0	0	0	0	0	0	0	0	0	0	0	0	0	0	0	0
b2022	hisB imidazoleglycerol-phosphate dehydratase / histidinol-phosphatase	0	0	ND	0	0	0	0	0	0	0	0	0	0	0	0	0	0
b2023	hisH imidazole glycerol phosphate synthase, HisH subunit	0	0	0	0	0	0	0	0	0	0	0	0	0	0	0	0	0
b2024	hisA N-(5'-phospho-L-ribosyl-formimino)-5-amino-1-(5'-phosphoribosyl)-4-imidazolecarboxamide isomerase	0	0	0	0	0	0	0	0	0	0	0	0	0	0	0	0	0
b2025	hisF imidazole glycerol phosphate synthase, HisF subunit	0	0	0	0	0	0	0	0	0	0	0	0	0	0	0	0	0
b2026	hisI phosphoribosyl-AMP cyclohydrolase / phosphoribosyl-ATP pyrophosphatase	0	0	0	0	0	0	0	0	0	0	0	0	0	0	0	0	0
b2027	cld regulator of length of O-antigen component of lipopolysaccharide chains	0	0	0	-3.57835	0	0	0	0	0	0	0	0	0	0	0	0	0
b2028	ugd UDP-glucose 6-dehydrogenase	0	0	ND	-2.27877	0	0	0	0	0	0	0	0	0	0	0	0	0
b2029	gnd 6-phosphogluconate dehydrogenase (decarboxylating)	0	0	0	0	0	0	0	3.58929	5.23997	0	0	0	0	0	2.77558	0	0
b2030	insH-7 IS5 transposase and trans-activator	0	0	0	-2.42272	0	0	0	0	0	0	0	0	0	0	0	0	0
b2031	yefJ	-2.38985	0	0	0	0	0	-1.92497	0	0	0	0	0	0	0	0	0	0
b2032	wbbK putative transferase	ND	ND	ND	0	0	ND	0	0	0	ND	0	0	0	0	0	0	ND
b2033	wbbJ predicted acyl transferase	0	0	0	0	0	0	0	0	0	0	0	0	0	0	0	0	0
b2034	wbbI beta;-1,6-galactofuranosyltransferase	0	0	0	0	0	0	0	0	0	0	0	0	0	0	0	0	0
b2035	rfc O-antigen polymerase	ND	ND	ND	0	0	0	0	0	0	0	0	0	0	0	0	0	0
b2036	glf UDP-galactopyranose mutase	0	0	ND	0	0	0	0	0	0	0	0	0	0	0	0	0	0
b2039	rfbA dTDP-glucose pyrophosphorylase	0	-2.70821	0	-2.92864	0	0	0	0	0	0	-2.15906	0	0	0	0	0	0
b2040	rfbD dTDP-4-dehydrorhamnose reductase	0	0	0	0	0	0	0	0	0	0	0	0	0	0	0	0	0
b2041	rfbB RmlB	0	0	0	0	0	0	0	0	0	0	0	0	0	0	0	0	0
b2042	galF predicted subunit with GalU	0	0	0	0	0	0	0	0	0	0	0	0	0	0	0	0	0
b2043	wcaM hypothetical protein	0	ND	0	ND	0	0	0	0	0	0	0	ND	0	0	0	0	ND
b2044	wcaL predicted colanic biosynthesis glycosyl transferase	0	0	0	0	0	0	0	0	0	0	0	0	0	0	0	0	0
b2045	wcaK predicted colanic acid biosynthesis pyruvyl transferase	0	0	0	0	0	0	0	0	0	0	0	0	0	0	0	0	0
b2046	wzxC WzxC	0	0	0	0	0	0	0	0	0	0	0	0	0	0	0	0	0
b2047	wcaJ predicted colanic acid biosynthsis UDP-glucose lipid carrier transferase	0	0	0	0	0	0	0	0	0	0	0	0	0	0	0	0	0
b2048	cpsG phosphomannomutase	0	0	0	0	0	0	0	0	0	0	0	0	0	0	0	0	0
b2049	cpsB mannose-1-phosphate guanylyltransferase-(GDP)	0	0	0	0	0	0	0	0	0	0	0	0	0	0	0	0	0
b2050	wcaI predicted colanic biosynthesis glycosyl transferase	0	ND	0	ND	0	0	0	0	0	0	0	ND	0	0	0	0	ND
b2051	gmm GDP-glucose glucosyl hydrolase / GDP-mannose mannosyl hydrolase	0	0	0	0	0	0	0	0	0	0	0	0	0	0	0	0	0
b2052	fcl GDP-fucose synthase	0	0	0	0	0	0	0	0	0	0	0	0	0	0	0	0	0
b2053	gmd GDP-mannose 4,6-dehydratase	0	0	0	0	0	0	0	0	0	ND	0	0	0	0	0	0	0
b2054	wcaF predicted acyl transferase	0	0	0	0	0	0	0	0	0	0	0	0	0	0	0	0	0
b2055	wcaE predicted colanic acid biosynthesis glycosyl transferase	0	0	0	0	0	0	0	0	0	ND	0	0	0	0	0	0	0
b2056	wcaD predicted colanic acid polymerase	0	0	0	0	0	0	0	0	0	0	0	0	0	0	0	0	0
b2057	wcaC predicted colanic acid biosynthesis glycosyl transferase	0	0	0	0	0	0	0	0	0	0	0	0	0	0	0	0	0
b2058	wcaB predicted colanic acid biosynthesis acyl transferase	0	0	0	0	0	0	0	0	0	0	0	0	0	0	0	0	0
b2059	wcaA predicted colanic acid biosynthesis glycosyl transferase	0	0	0	0	0	0	0	0	0	0	0	0	0	0	0	0	0
b2060	wzc tyrosine kinase involved in colanic acid biosynthesis	0	0	0	0	0	0	0	0	0	0	0	0	0	0	0	0	0
b2061	wzb tyrosine phosphatase	0	0	0	0	0	0	0	0	0	0	0	0	0	0	0	0	0
b2062	wza lipoprotein required for capsular polysaccharide translocation through the outer membrane	0	0	0	0	0	0	0	0	2.21041	0	0	0	0	0	0	0	0
b2063	yegH putative transport protein	0	0	0	0	0	0	0	0	0	0	0	0	0	0	0	0	0
b2064	asmA predicted assembly protein AsmA	0	0	0	0	0	0	0	0	0	0	0	0	0	0	0	0	0
b2065	dcd dCTP deaminase	0	0	0	0	0	0	0	0	0	0	0	0	0	2.26819	0	0	0
b2066	udk uridine kinase / cytidine kinase	0	0	0	0	0	0	0	0	0	0	0	0	0	1.69224	0	0	0
b2068	alkA 3-methyl-adenine DNA glycosylase II, inducible	0	0	0	0	0	0	0	0	0	0	0	0	0	0	0	0	0
b2069	yegD actin family protein	0	0	0	0	0	0	0	0	0	0	0	0	0	0	0	0	0
b2071	yegJ predicted protein	0	0	0	0	0	0	0	0	0	0	0	0	0	0	0	0	0
b2072	yegK predicted protein	0	0	0	0	0	0	0	0	0	0	0	0	0	0	0	0	0
b2073	yegL conserved protein	0	0	0	0	0	0	0	0	0	0	0	0	0	0	0	0	0
b2074	mdtA MdtABC-TolC Multidrug Efflux Transport System	0	0	0	0	0	0	0	0	0	0	0	0	0	0	0	0	0
b2075	mdtB MdtABC-TolC Multidrug Efflux Transport System	0	0	0	0	0	0	0	0	0	0	0	0	0	0	0	0	0
b2076	mdtC MdtABC-TolC Multidrug Efflux Transport System	0	ND	0	ND	0	0	0	0	0	0	0	ND	0	0	0	0	ND
b2077	mdtD YegB	0	0	0	0	0	0	0	0	0	0	0	0	0	0	0	0	0
b2078	baeS BaeS-P his	0	0	0	0	0	0	0	0	0	0	0	0	0	0	0	0	0
b2079	baeR BaeR-Phosphorylated transcriptional activator	0	0	0	0	0	0	0	0	0	0	0	0	0	0	0	0	0
b2080	yegP predicted protein	0	0	0	0	0	0	0	0	0	0	0	0	0	0	0	0	0
b2081	yegQ predicted peptidase	0	0	0	0	0	0	0	0	0	0	0	0	0	0	0	0	0
b2082	ogrK DNA-binding transcriptional regulator, prophage P2 remnant	ND	ND	ND	ND	0	0	0	0	0	0	0	0	ND	0	0	0	0
b2083	yegZ putative phage protein (D protein)	0	0	0	0	0	0	0	0	0	0	0	0	0	0	0	0	0
b2084	b2084	0	0	0	0	0	0	0	0	0	0	0	0	0	0	0	0	0
b2085	yegR predicted protein	0	0	0	0	0	0	0	0	0	0	0	0	0	0	0	0	0
b2086	yegS lipid kinase	0	ND	0	ND	0	0	0	0	0	0	0	ND	0	0	0	0	ND
b2087	gatR_1 negative DNA-binding transcriptional regulator of galactitol metabolism	0	ND	ND	0	0	0	0	0	0	0	0	0	0	0	0	0	0
b2088	insE-5 IS3 element protein InsE	0	0	0	-2.78605	0	0	0	0	0	0	0	0	0	0	0	0	0
b2089	insF-5 IS3 element protein InsF	0	0	0	-2.767	0	0	0	0	0	0	0	0	0	0	0	0	0
b2090	gatR_2 GatR transcriptional repressor	ND	ND	ND	0	0	0	0	0	0	0	0	0	0	0	0	0	0
b2091	gatD galactitol-1-phosphate dehydrogenase	0	0	ND	0	0	0	0	0	0	0	0	0	0	0	0	0	0
b2092	gatC galactitol PTS permease	0	0	0	0	0	0	0	0	0	0	0	0	0	0	0	0	0
b2093	gatB galactitol PTS permease	ND	ND	ND	0	0	0	0	0	0	0	0	0	0	0	0	0	0
b2094	gatA galactitol PTS permease	0	0	0	0	0	0	0	0	0	0	0	0	0	0	0	0	0
b2095	gatZ tagatose-1,6-bisphosphate aldolase 2	0	ND	ND	0	0	0	0	0	0	0	0	0	0	0	0	0	0
b2096	gatY tagatose-1,6-bisphosphate aldolase 2	0	0	ND	0	0	0	0	0	0	0	0	0	0	0	0	0	0
b2098	yegT YegT MFS transporter	0	0	0	0	-2.29071	0	0	0	0	0	0	0	0	0	0	0	0
b2099	yegU predicted hydrolase	0	0	0	0	0	0	0	0	0	0	0	0	0	0	0	0	0
b2100	yegV predicted kinase	0	0	0	0	0	0	0	0	0	0	0	0	0	0	0	0	0
b2101	yegW predicted DNA-binding transcriptional regulator	0	0	0	0	0	0	0	0	0	0	0	0	0	0	0	0	0
b2102	yegX predicted hydrolase	0	0	0	0	0	0	0	0	0	0	0	0	0	0	0	0	0
b2103	thiD hydroxymethylpyrimidine kinase / phosphohydroxymethylpyrimidine kinase	0	0	0	0	0	0	0	0	0	0	0	0	0	0	0	0	0
b2104	thiM hydroxyethylthiazole kinase	0	0	0	0	0	0	0	0	0	0	0	0	0	0	0	0	0
b2105	rcnR RcnR transcriptional repressor	0	0	0	0	0	0	0	0	0	0	0	0	0	0	0	0	0
b2106	rcnA membrane protein conferring nickel and cobalt resistance	0	0	0	-3.66285	0	0	0	0	0	0	0	0	0	0	0	0	0
b2107	yohN predicted protein	0	0	0	-3.44411	0	0	0	0	0	0	0	0	0	0	0	0	0
b2108	yehA putative type-1 fimbrial protein	0	0	ND	0	0	0	0	0	0	0	0	0	0	0	0	0	0
b2109	yehB putative outer membrane protein	0	0	0	-2.65647	0	0	0	0	0	0	0	0	0	0	0	0	0
b2110	yehC putative chaperone	0	0	ND	0	0	0	0	0	0	0	0	0	0	0	0	0	0
b2111	yehD predicted fimbrial-like adhesin protein	ND	ND	ND	0	0	0	0	0	0	0	0	0	0	0	0	0	0
b2112	yehE predicted protein	-2.22282	0	ND	0	0	0	0	0	0	0	0	0	0	0	0	0	0
b2113	mrp putative ATPase	0	0	0	0	0	0	0	0	0	0	0	0	0	0	0	0	0
b2114	metG methionyl-tRNA synthetase	0	0	0	0	0	0	0	0	0	0	0	0	0	0	0	0	0
b2115	molR_1	0	0	0	0	0	0	0	0	0	0	0	0	0	0	0	0	0
b2116	molR_2	0	0	-2.34769	-3.66059	0	0	0	0	0	0	0	0	0	0	0	0	0
b2117	molR_3	0	0	-2.60465	-2.30106	0	0	0	0	0	0	0	0	0	0	0	0	0
b2118	yehI conserved protein	0	0	0	0	0	0	0	0	0	0	0	0	0	0	0	0	0
b2119	yehL predicted transporter subunit: ATP-binding component of ABC superfamily	0	0	0	0	0	0	0	0	0	0	0	0	0	0	0	0	0
b2120	yehM predicted protein	0	0	0	0	0	0	0	0	0	0	0	0	0	0	0	0	0
b2121	yehP conserved protein	0	0	0	0	0	0	0	0	0	0	0	0	0	0	0	0	0
b2122	yehQ predicted protein	0	0	0	0	0	0	0	0	0	0	0	0	0	0	0	0	0
b2123	yehR conserved protein	0	0	0	-2.62045	0	0	0	0	0	0	0	0	0	0	0	0	0
b2124	yehS conserved protein	0	0	0	0	0	0	0	0	0	0	0	0	0	0	0	0	0
b2125	yehT two-component response regulator	0	0	0	0	0	0	0	0	0	0	0	0	0	0	0	0	0
b2126	yehU putative 2-component sensor protein	0	0	0	0	0	0	0	0	0	0	0	0	0	0	0	0	0
b2127	mlrA similarity to MerR-family regulators	0	0	0	0	0	0	0	0	0	0	0	0	0	0	0	0	0
b2128	yehW YehW/YehX/YehY/YehZ ABC transporter	0	0	0	0	0	0	0	0	0	0	0	0	0	0	0	0	0
b2129	yehX YehW/YehX/YehY/YehZ ABC transporter	0	0	0	0	0	0	0	0	0	0	0	0	0	0	0	0	0
b2130	yehY YehW/YehX/YehY/YehZ ABC transporter	0	0	0	0	0	0	0	0	0	0	0	0	0	0	0	0	0
b2131	osmF YehW/YehX/YehY/YehZ ABC transporter	0	0	0	0	0	0	0	0	0	0	0	0	0	0	0	0	0
b2132	bglX beta;-D-glucoside glucohydrolase, periplasmic	0	0	ND	0	0	0	0	0	0	0	0	0	0	0	0	0	0
b2133	dld D-lactate dehydrogenase	0	0	0	0	0	0	0	0	0	0	0	0	0	0	0	0	0
b2134	pbpG penicillin-binding protein 7	0	0	0	0	0	0	0	0	0	0	0	0	0	0	0	0	0
b2135	yohC putative transport protein	0	0	0	0	0	0	0	0	0	0	0	0	0	0	0	0	0
b2136	yohD conserved inner membrane protein	0	0	0	0	0	0	0	0	0	0	0	0	0	0	0	0	0
b2137	yohF predicted acetoin dehydrogenase	0	0	0	0	0	0	0	0	0	0	0	0	0	0	0	0	0
b2138	mdtQ putative channel/filament protein	0	0	0	0	0	0	0	0	0	0	0	0	0	0	0	0	0
b2139	yohH conserved protein	0	0	0	0	0	0	0	0	0	0	0	0	0	0	0	0	0
b2140	dusC tRNA dihydrouridine synthase	0	0	0	0	0	0	0	0	0	0	0	0	0	0	0	0	0
b2141	yohJ conserved inner membrane protein	0	0	0	0	0	0	0	0	0	0	0	0	0	0	0	0	0
b2142	yohK putative seritonin transporter	0	0	0	0	0	0	0	0	0	0	0	0	0	0	0	0	0
b2143	cdd cytidine deaminase	0	0	0	0	0	0	0	0	0	0	0	0	0	1.6902	0	0	0
b2144	sanA vancomycin sensitivity	0	0	0	0	0	0	0	0	0	0	0	0	0	0	0	0	0
b2145	yeiS predicted inner membrane protein	0	0	0	0	0	0	0	0	0	0	0	0	0	0	0	0	0
b2146	yeiT predicted oxidoreductase	0	0	0	0	0	0	0	0	0	0	0	0	0	0	0	0	0
b2147	yeiA predicted oxidoreductase	0	0	0	0	0	0	0	0	0	0	0	0	0	0	0	0	0
b2148	mglC galactose ABC transporter	0	0	0	0	0	0	0	0	0	0	0	0	0	0	0	0	0
b2149	mglA galactose ABC transporter	0	0	0	0	0	0	0	0	0	0	0	0	0	0	0	0	0
b2150	mglB galactose ABC transporter	0	0	0	0	0	0	0	0	0	0	0	0	0	0	0	0	0
b2151	galS GalS transcriptional dual regulator	0	0	ND	0	0	0	0	0	0	0	0	0	0	0	0	0	0
b2152	yeiB conserved inner membrane protein	0	0	0	0	0	0	0	0	0	0	0	0	0	0	0	0	0
b2153	folE GTP cyclohydrolase I monomer	0	0	0	ND	0	0	0	0	0	0	0	0	0	0	0	0	0
b2154	yeiG S-lactoylglutathione hydrolase / S-formylglutathione hydrolase	0	0	0	0	0	0	0	0	0	0	0	0	0	0	0	0	0
b2155	cirA outer membrane receptor for iron-regulated colicin I receptor; porin; requires tonB gene product	0	0	0	0	0	0	0	0	0	ND	0	0	0	0	0	0	0
b2156	lysP LysP lysine APC transporter	0	0	0	0	0	0	0	0	0	0	0	0	0	0	0	0	0
b2157	yeiE LYSR-type transcriptional regulator	0	0	0	0	0	0	0	0	0	0	0	0	0	0	0	0	0
b2158	yeiH conserved inner membrane protein	0	0	0	0	0	0	0	0	0	0	0	0	0	0	0	0	0
b2159	nfo endonuclease IV	0	0	0	0	0	0	0	0	0	0	0	0	0	0	0	0	0
b2160	yeiI predicted kinase	0	ND	0	ND	0	0	0	0	0	0	0	0	0	0	0	0	0
b2161	nupX putative pyrimidine nucleoside transporter	0	0	0	0	0	0	0	0	0	0	0	0	0	0	0	0	0
b2162	rihB ribonuceloside hydrolase 2 (pyrimidine-specific)	0	0	0	0	0	0	0	0	0	0	0	0	0	0	0	0	0
b2163	yeiL YeiL transcriptional activator	0	0	0	-2.65917	0	0	0	0	0	0	0	0	0	0	0	0	0
b2164	yeiM YeiM NUP transporter	0	0	0	0	0	0	0	0	0	0	0	0	0	0	0	0	0
b2165	yeiN conserved protein	0	0	0	0	0	0	0	0	0	0	0	0	0	0	0	0	0
b2166	yeiC predicted kinase	0	0	0	-3.74192	0	0	0	0	0	0	0	0	0	0	0	0	0
b2167	fruA fructose PTS transporter	0	0	0	-2.90527	0	0	0	0	0	0	0	0	0	0	0	0	0
b2168	fruK 1-phosphofructokinase monomer	0	0	0	0	0	0	0	0	0	0	0	0	0	0	0	0	0
b2169	fruB fructose PTS transporter	0	0	0	0	0	0	0	0	0	0	0	0	0	0	0	0	0
b2170	setB SetB MFS transporter	0	0	0	0	0	0	0	0	0	0	0	0	0	0	0	0	0
b2171	yeiP predicted dehydrogenase, NAD-dependent	0	0	0	0	0	0	0	0	0	0	0	0	0	0	0	0	0
b2172	yeiQ predicted dehydrogenase, NAD-dependent	0	0	ND	0	0	0	0	0	0	0	0	0	0	0	0	0	0
b2173	yeiR predicted enzyme	0	0	0	0	0	0	0	0	0	0	0	0	0	0	0	0	0
b2174	yeiU protein with low undecaprenyl pyrophosphate phosphatase activity	0	0	0	0	-1.77759	0	0	-1.84567	0	0	0	0	0	0	0	0	0
b2175	spr predicted peptidase, outer membrane lipoprotein	0	0	0	0	0	0	0	0	0	0	0	0	0	0	0	0	0
b2176	rtn putative lipoprotein	0	0	0	0	0	0	0	0	0	0	0	0	0	0	0	0	0
b2177	yejA YejA/YejB/YejE/YejF ABC transporter	0	0	0	0	0	0	0	0	0	0	0	0	0	0	0	0	0
b2178	yejB YejA/YejB/YejE/YejF ABC transporter	0	0	0	0	0	0	0	0	0	0	0	0	0	0	0	0	0
b2179	yejE YejA/YejB/YejE/YejF ABC transporter	0	0	-3.38684	0	0	0	0	0	0	-2.77298	0	0	0	0	0	0	0
b2180	yejF YejA/YejB/YejE/YejF ABC transporter	0	0	0	0	0	0	0	0	0	-2.30538	0	0	0	0	0	0	0
b2181	yejG predicted protein	0	0	0	0	0	0	0	0	0	0	0	0	0	0	0	0	0
b2182	bcr Bcr multidrug MFS transporter	0	0	0	0	0	0	0	0	0	0	0	0	0	0	0	0	0
b2183	rsuA 16S rRNA pseudouridine synthase	0	0	0	0	0	0	0	0	0	0	0	0	0	0	0	0	0
b2184	yejH predicted ATP-dependent helicase	0	0	0	0	0	0	0	0	0	0	0	0	0	0	0	0	0
b2185	rplY 50S ribosomal subunit protein L25	0	0	0	0	0	0	0	0	0	0	0	0	0	0	0	0	0
b2186	yejK DNA-associated protein	0	0	0	0	0	0	0	0	0	0	0	0	0	0	0	0	0
b2187	yejL conserved protein	0	0	0	0	0	0	0	0	0	0	0	0	0	0	0	0	0
b2188	yejM predicted hydrolase, inner membrane	0	0	0	0	0	-2.80239	0	0	0	0	0	0	0	0	0	0	0
b2190	yejO predicted autotransporter outer membrane protein	0	0	0	-3.57661	0	0	0	0	0	0	0	0	0	0	0	0	0
b2192	insH-8 IS5 transposase and trans-activator	0	0	0	-2.70079	0	0	0	0	0	0	0	0	0	0	0	0	0
b2193	narP NarP-Phosphorylated transcriptional dual regulator	0	0	0	0	0	0	0	0	0	0	0	0	0	0	0	0	0
b2194	ccmH cytochrome c biogenesis protein CcmH	0	0	0	0	0	0	0	0	0	0	0	0	0	0	0	0	0
b2195	ccmG thioredoxin-like protein, cytochrome c biogenesis	0	0	0	0	0	0	0	0	0	0	0	0	0	0	0	0	0
b2196	ccmF cytochrome c-type biogenesis protein	0	0	0	0	0	0	0	0	0	0	0	0	0	0	0	0	0
b2197	ccmE CcmABCDEFGH cytochrome c biogenesis system	0	0	0	0	0	0	0	0	0	0	0	0	0	0	0	0	0
b2198	ccmD CcmABCDEFGH cytochrome c biogenesis system	0	0	0	0	0	0	0	1.5433	0	0	0	0	0	0	0	2.64746	0
b2199	ccmC CcmABCDEFGH cytochrome c biogenesis system	0	0	0	0	0	0	0	0	0	0	0	0	0	0	0	0	0
b2200	ccmB CcmABCDEFGH cytochrome c biogenesis system	0	0	0	0	0	0	0	0	0	0	0	0	0	0	0	0	0
b2201	ccmA CcmABCDEFGH cytochrome c biogenesis system	0	0	0	0	0	0	0	0	0	0	0	0	0	0	0	0	0
[truncated: 1,983 more rows]
