# Supplementary material for: Genetic Architecture of Intrinsic Antibiotic Susceptibility
Source: PLoS One. 2009 May 20;4(5):e5629. doi: 10.1371/journal.pone.0005629 (PMC2680486; doi:10.1371/journal.pone.0005629)
Supplement: Dataset S2 — Normalized ratios (transposon signal/genomic DNA signal) (4.23 MB XLS) [file pone.0005629.s021.xls]

## Sheet: S2-Normalized Ratios
Dataset S2: Normalized ratios (transposon signal/genomic DNA signal)
Con_RX_DY refers to independent control culture #X of library, which was propagated in media without antibiotics for Y days. (Sample 5 wasn't hybridized.)
0Z_ref refers to the Zth hybridization of the unselected library.
LQ: low quality spot that did not yield usable data.
bnum	description	Con_R4_D2	Con_R6_D2	Con_R7_D2	Con_R1_D4	Con_R2_D4	Con_R3_D4	AMK_R1	AMK_R2	GEN_R1	GEN_R2	STR_R1	STR_R2	TOB_R1	TOB_R2	AMP_R1	AMP_R2	FOX_R1	FOX_R2	FOX_R3	PIP_R1	PIP_R2	PIP_R3	LOM_R1	LOM_R2	NAL_R1	NAL_R2	SLF_R1	SLF_R2	TRM_R1	TRM_R2	TRM_R3	DOX_R1	DOX_R2	TET_R1	TET_R2	TET_R3	ERY_R1	ERY_R2	FUS_R1	FUS_R2	BLM_R1	BLM_R2	NIT_R1	NIT_R2	DOX_R3	SLF_R3	AMP_R3	LOM_R3
b0002	thrA aspartate kinase / homoserine dehydrogenase	0.501259	1.1188	0.942543	0.873361	0.293373	0.713697	1.2128	1.47951	1.32706	1.1132	0.78594	0.396846	1.72786	3.07013	1.58909	1.81668	1.35208	1.23632	1.01222	0.769093	2.74772	2.90629	1.0812	1.8066	0.38476	1.41537	1.60178	1.13716	1.24907	0.836041	0.883818	0.93024	1.32566	1.05453	0.362902	0.442451	1.07435	1.38655	1.26955	1.06384	0.449212	0.978704	0.404744	1.07813	0.301039	0.942588	0.405056	0.256473
b0003	thrB homoserine kinase	0.69099	0.883286	1.21092	0.885486	1.14941	0.592668	1.2946	0.724818	0.95378	1.10959	0.503394	0.408911	1.37504	2.5131	1.2821	0.355018	1.1457	1.32917	1.34272	1.59838	0.720146	0.790158	0.617386	0.541629	1.52115	0.210429	0.875487	0.788509	0.429223	0.766469	0.709979	0.841795	0.948485	1.39769	0.122133	0.139025	0.769614	0.41789	0.880322	1.26311	0.282908	0.888039	0.410385	0.929324	0.266229	1.21402	0.21697	1.35425
b0004	thrC threonine synthase	0.546204	1.0103	1.12926	1.21735	1.11986	1.22095	0.585646	0.522246	0.737581	0.983709	1.56773	0.244056	1.27899	1.58229	1.11576	1.49406	1.07355	1.38252	1.3814	1.80994	0.999356	1.11239	2.04061	0.479453	0.76304	1.36202	0.962853	0.281853	0.980849	0.558319	0.586419	0.795402	0.610468	1.68629	0.342275	0.349498	0.722549	0.368245	0.50152	0.949989	0.700412	1.13789	0.172673	1.37731	0.169279	0.696297	1.43733	1.36981
b0005	yaaX predicted protein	0.93874	0.736533	1.29831	0.905742	0.550325	0.909779	0.46691	1.36582	1.14409	1.712	1.53342	0.522727	1.25663	1.26393	0.862695	2.4738	0.805418	0.755057	0.797767	1.82006	0.349553	0.383476	0.452179	8.27173	0.978603	0.318765	2.09654	0.659956	1.73015	0.852965	0.764727	0.770914	0.910747	0.569164	0.198931	0.233861	0.838519	0.301979	0.616397	0.695308	3.26315	1.15513	0.293883	2.19167	0.237029	0.76171	0.89837	0.465972
b0006	yaaA conserved protein	1.48701	1.06763	1.02748	0.613038	0.530483	0.322378	1.1827	0.429092	1.07531	1.57752	0.722041	0.414903	2.40624	1.56715	1.20742	0.530893	0.771583	1.43028	1.33068	2.44415	0.615157	0.546824	0.406366	0.952466	0.674499	0.332037	1.58911	1.71837	0.719811	1.30575	1.06596	1.56005	1.54742	1.69902	0.36014	0.346725	1.21465	0.497174	1.21533	1.33622	1.49122	3.32929	0.237804	0.932708	0.165255	1.85235	1.01582	0.83656
b0007	yaaJ YaaJ alanine AGSS transporter	1.16791	1.27304	1.15725	1.444	0.239891	2.37795	1.11793	1.37058	1.6355	1.46366	1.26479	0.44858	1.15108	2.21608	3.11672	3.17855	1.98746	2.00932	2.17808	3.50213	2.00497	2.26267	1.81196	1.50046	0.103003	0.348541	0.983767	1.63599	0.35274	0.676655	0.720922	1.45395	1.28478	2.02976	0.110674	0.0829102	0.836304	1.02991	0.730309	0.937935	0.261164	1.20901	1.42335	1.44283	0.273445	1.17886	1.76123	0.718595
b0008	talB transaldolase B	0.600077	1.02983	1.56326	0.441292	0.980781	0.744425	2.04546	0.65289	1.3451	2.12309	1.65447	0.582772	5.673	5.57382	0.521001	0.98996	0.681052	0.639434	0.596964	0.458959	0.9758	0.896013	0.718393	0.334183	3.36938	0.623959	1.14332	1.48584	0.492094	0.643514	0.652787	0.507636	0.794176	0.494905	0.156934	0.113022	0.643014	0.822139	0.258499	0.738988	0.527999	1.69299	0.908257	0.709645	0.152597	0.546473	0.249487	0.561644
b0009	mog predicted molybdochelatase	0.921823	0.687886	0.814004	0.517089	0.690363	1.0257	0.646684	0.704978	1.00332	0.822677	0.309861	0.384011	1.56018	2.77037	0.887673	0.853388	0.698715	1.07844	0.89592	1.05813	1.43056	1.14882	0.708577	0.918599	0.471119	0.283505	0.789427	0.844509	0.997463	0.78706	0.64927	0.693767	1.24934	0.832799	0.272481	0.237021	0.681284	0.236195	1.60589	0.594232	0.154738	0.605211	0.81494	1.00487	0.155996	0.609095	0.704689	1.2043
b0010	yaaH conserved inner membrane protein associated with acetate transport	0.44276	0.991049	0.726579	0.426574	1.63281	0.59601	0.677045	0.428907	1.14247	1.05161	0.553091	0.440711	1.46984	1.11394	0.661167	0.570151	0.668295	0.741674	0.603084	0.722955	1.88003	1.65312	0.726844	1.90458	0.370797	0.609582	1.68086	1.06382	1.03303	0.865375	0.717348	0.491813	0.409328	1.51053	0.219002	0.287441	0.776791	0.428797	0.72662	2.12589	0.178037	0.804883	0.257191	1.01602	0.159759	0.716041	0.342621	0.679265
b0011	yaaW conserved protein	1.35439	1.07454	1.69712	0.997123	4.20353	0.858819	0.667977	0.7924	1.13574	LQ	0.512701	0.798702	2.37837	1.30816	1.42778	2.37338	1.55632	1.02538	LQ	1.32762	0.30818	0.60485	0.534275	3.16287	1.17486	1.01779	1.06725	1.66708	1.33033	1.35166	LQ	0.865018	1.37808	0.464472	1.27502	LQ	1.1876	1.24573	1.49172	0.995745	1.31455	0.978085	0.816618	0.765873	0.770694	1.82912	1.2541	1.17661
b0012	htgA predicted DNA-binding transcriptional regulator	1.39562	1.18077	2.03772	0.897822	6.06098	0.829617	0.416668	1.23544	1.2837	0.794135	0.257771	0.665321	2.96086	1.69154	1.84208	3.13367	2.10886	1.04686	0.92793	1.67613	0.37114	0.425207	0.545878	3.28281	1.3888	0.855918	1.39477	1.73661	1.63808	1.5258	1.26425	0.806433	1.50862	0.63419	0.945713	0.951242	1.48303	1.20109	1.93047	0.859409	1.39652	1.25948	0.651351	0.762233	0.31603	2.44114	1.59052	1.6814
b0013	yaaI predicted protein	2.2249	1.0745	2.5621	2.00327	3.32624	1.87046	0.70552	1.17814	2.78868	1.1755	0.536911	2.75148	1.48907	2.31184	2.73804	2.31541	1.66032	0.934461	1.02272	0.938065	0.971775	0.894249	2.34201	7.17598	3.62008	3.91893	1.65064	2.01944	4.83089	2.31216	2.07195	1.10214	1.97067	0.937307	5.85855	3.55021	4.18084	4.82665	5.49296	1.45349	6.5246	3.28389	2.2264	2.97807	5.47502	0.705519	2.5525	2.10524
b0014	dnaK chaperone Hsp70; DNA biosynthesis; autoregulated heat shock proteins	0.340983	0.317755	0.255377	0.424334	0.196084	0.233245	2.04914	7.60057	9.3861	7.2194	0.31632	0.783041	1.35086	2.69002	0.272406	0.449175	0.438052	0.546769	0.547915	0.20895	0.561981	0.475955	0.729092	0.220627	0.840842	0.431015	0.419058	0.407762	0.436058	0.55239	0.441189	0.304274	0.41195	0.468377	0.206999	0.177867	0.310029	0.258527	0.296713	0.541655	0.516675	0.550022	0.845448	0.341252	0.218878	0.138233	0.361418	0.399693
b0015	dnaJ chaperone with DnaK; heat shock protein	0.855586	0.976593	0.807281	0.528286	0.762791	0.566332	1.80008	4.73948	4.9197	2.16993	0.824622	0.22663	1.92304	0.699312	1.39294	0.417195	3.16989	3.56701	3.49553	2.36434	2.49815	3.13749	1.12936	0.598874	12.0907	4.44271	0.887652	0.343781	0.525086	0.866897	0.874136	0.774888	0.478006	0.586802	0.247856	0.210897	0.905314	1.11456	0.516572	1.20257	1.14265	2.39366	0.180475	0.451389	0.322511	0.33629	1.89655	3.43386
b0016	insL-1 IS186/IS421 transposase	1.0483	1.00454	0.997324	1.023	0.632767	0.943664	0.996116	1.27162	0.841044	1.48613	0.930097	0.948568	0.948545	0.520689	1.10385	0.416344	1.13954	0.936687	0.936901	1.2535	0.739357	0.655834	0.292181	1.29731	1.64373	1.11341	1.5112	1.02265	0.917807	0.98352	1.00623	0.865634	1.48293	0.82409	0.439787	0.374599	0.659593	0.641733	0.672215	1.10548	1.38184	0.796634	0.945893	1.08879	0.338775	2.33711	0.821245	1.23764
b0017	yi82_1	0.45801	0.809627	0.444942	0.982803	0.561777	0.743167	0.691903	0.730198	0.691322	1.35224	0.463856	0.858952	1.55051	0.55035	0.968128	0.478986	1.12578	0.896361	0.867787	1.29299	0.3911	0.452378	0.385116	0.377326	0.563507	1.31251	1.28829	0.68853	0.895218	0.486194	0.626291	0.662768	0.906091	0.584725	0.189229	0.272896	0.507043	0.57443	0.822664	0.811717	0.674028	0.841582	0.423009	1.35903	0.220644	2.95787	0.362849	1.00867
b0018	mokC regulatory peptide whose translation enables hokC (gef) expression	1.65335	1.21754	2.04737	1.56269	1.28671	0.898166	1.54597	LQ	1.20776	LQ	1.53521	LQ	1.19878	1.13715	1.72094	2.52771	1.33582	1.4662	LQ	2.03238	1.99269	LQ	1.81339	2.0303	2.22801	LQ	1.31225	LQ	1.44421	1.22355	LQ	1.2613	1.96553	1.44975	1.64843	LQ	2.58831	1.28063	1.78835	1.11108	0.766331	1.63042	1.41068	1.59431	0.820282	1.37437	1.09062	0.870029
b0019	nhaA NhaA sodium/proton transporter	0.404343	0.810887	0.656226	0.891731	0.250354	0.808946	0.172231	0.4237	0.251525	0.484631	0.158911	0.374426	0.750589	0.521404	0.573927	0.362123	0.262494	0.908689	1.01209	0.290004	0.726107	0.694614	0.348429	0.167549	0.183353	0.614269	0.495833	0.878653	0.35633	0.848019	0.759513	0.403944	2.49664	0.407433	0.257332	0.25289	0.487571	0.273778	0.157115	0.747525	0.242223	0.495467	0.215292	0.764077	0.14336	0.308934	0.312285	0.281331
b0020	nhaR NhaR transcriptional activator	1.90398	1.15149	1.16869	0.355962	0.882028	2.76658	0.411422	0.729339	0.909581	1.17331	0.210957	0.676979	0.824432	1.45055	1.31107	0.718743	1.61149	1.26442	1.16244	1.70447	0.979479	0.915864	0.629073	0.211515	1.13597	1.51264	0.970881	1.35848	0.560086	1.70595	1.56276	1.35755	0.546995	0.957743	0.230091	0.294783	1.27953	0.753872	0.795375	1.61423	0.299852	2.07198	2.35359	1.78152	0.268283	0.888431	1.76518	1.44141
b0021	insB-1 IS1 protein InsB	1.95235	2.41577	2.07655	1.73664	1.07526	1.65188	0.806804	1.64064	1.41542	1.76895	0.903919	2.12901	0.734477	1.41288	1.50133	2.96706	1.74852	3.09852	3.76695	1.52658	2.96534	3.52224	1.60063	3.80792	1.6832	2.44797	2.17273	1.71196	2.17047	1.83729	2.32346	2.1205	1.31049	1.33506	2.90083	2.96451	1.47053	1.66114	1.98811	2.16478	3.64479	1.01406	1.70102	1.91979	2.16057	1.45062	2.5701	1.09811
b0022	insA-1 IS1 protein InsA	1.58818	1.76281	1.43839	1.85312	0.796863	1.2906	0.831715	0.800185	0.95605	1.39854	0.894638	LQ	1.04257	0.840316	1.06466	1.44944	0.898503	1.57694	1.44549	0.943312	0.811883	LQ	0.758566	1.75638	0.852038	1.06503	1.65829	1.03748	0.830118	1.21102	1.13116	1.10946	2.72772	1.85184	0.546355	0.595383	0.968637	0.749056	1.38785	1.4337	1.63088	1.93783	1.25781	1.59315	0.771348	1.63746	1.21056	1.73902
b0023	rpsT 30S ribosomal subunit protein S20	1.21327	0.75372	0.669156	1.02447	0.522951	0.57866	0.769867	LQ	1.01353	0.749117	0.555652	0.774499	0.971042	1.15002	0.793681	1.10154	0.642346	0.891507	0.941251	0.523928	0.656151	0.628114	0.906035	0.610918	0.422566	0.612925	1.2295	0.657381	0.893371	0.840823	0.855434	0.404171	0.986459	1.10988	0.478547	LQ	0.51668	0.767836	0.432039	0.742822	0.556504	1.24488	0.649981	0.966759	0.504707	0.528946	0.67213	0.51366
b0025	ribF bifunctional riboflavin kinase / FMN adenylyltransferase	0.219771	0.24182	0.550046	0.482135	0.162172	0.192995	0.309352	0.995426	0.63828	0.628331	0.748075	0.64298	0.825657	1.10261	0.459753	0.476603	0.441393	0.58775	0.524008	0.311142	0.261984	0.260997	0.325614	0.160708	0.110449	0.140202	0.329383	0.134756	0.547635	0.228835	0.215516	0.221401	0.436937	0.724727	0.194305	0.138931	0.19793	0.196082	0.145683	0.198043	0.132764	0.560666	0.155257	0.330017	0.162162	0.147489	0.597473	0.158111
b0026	ileS isoleucyl-tRNA synthetase	0.387766	0.407694	0.457573	0.491598	0.331922	0.293459	0.127783	0.36809	0.125855	0.432158	0.151634	0.340174	0.0849357	0.575268	0.149644	0.798829	0.136081	0.485214	0.479883	0.134067	0.442598	0.389934	0.738115	0.351579	0.0777601	0.408308	0.645037	0.348211	0.676555	0.430344	0.434082	0.0944621	0.761661	0.810844	0.317515	0.289796	0.119297	0.424713	0.0587878	0.414528	0.338231	0.900182	0.326448	0.632096	0.328986	0.122091	0.396314	0.143906
b0027	lspA prolipoprotein signal peptidase II	0.486794	0.217537	0.215459	0.282716	0.173823	0.215874	0.365887	0.201484	0.218637	0.505928	0.322629	0.227095	0.247501	0.347228	0.278144	0.383571	0.284911	0.337641	0.275681	0.271705	0.189517	0.17799	0.343583	0.156205	0.206528	0.147674	0.366432	0.182878	0.338724	0.196962	0.164572	0.559556	0.416147	0.472381	0.13916	0.144709	0.0969865	0.233992	0.10467	0.20752	0.136692	0.482774	0.196444	0.337359	0.184638	0.26247	0.185656	0.315372
b0028	fkpB peptidylprolyl isomerase	0.155097	0.252944	0.688603	0.328053	0.334111	0.134329	1.67542	0.136059	1.84719	1.24597	0.537143	0.143478	1.07546	0.330003	0.196144	0.272276	0.298676	0.381292	0.341355	0.779297	0.14086	0.121094	0.224125	0.117913	0.725129	0.135412	0.204149	0.285695	0.219565	0.222479	0.257756	0.276797	0.891197	0.41507	0.101535	0.13013	0.184224	0.132446	0.149535	0.611799	0.109517	0.535835	0.144541	0.220409	0.0952107	0.410887	0.171109	0.469076
b0029	ispH 1-hydroxy-2-methyl-2-(E)-butenyl 4-diphosphate reductase	0.282133	0.425603	0.422915	0.500233	0.302169	0.244176	0.363345	0.254497	0.423975	0.458365	0.266929	0.27403	0.385618	0.423595	0.499253	0.399434	0.314409	0.345505	0.340374	0.323042	0.309303	0.251422	0.494461	0.212456	0.266587	0.255417	0.532808	0.45711	0.368231	0.333683	0.32974	0.434024	0.49572	0.463629	0.276845	0.21484	0.333851	0.230578	0.2048	0.396297	0.207671	0.716745	0.526367	0.941188	0.207373	0.628656	0.509298	0.617168
b0030	rihC ribonucleoside hydrolase 3	1.99864	1.05023	1.20251	0.296894	1.47823	0.815961	1.51994	0.0656937	0.601909	0.737111	0.554293	0.606575	0.260523	1.07047	1.23632	0.122083	0.830719	0.359978	0.305919	0.845326	0.71071	0.492918	0.227245	1.0605	0.437125	0.434654	1.08455	1.10164	0.328612	0.672498	0.562992	0.730812	1.90591	1.63764	2.33424	1.8021	0.897232	0.065498	1.42531	1.28192	1.53774	1.9986	1.17279	0.34718	0.0598559	1.37506	0.973107	1.64871
b0031	dapB dihydrodipicolinate reductase	0.20336	0.184324	0.165116	0.178885	0.149484	0.214325	0.16793	0.0857044	0.24638	0.416037	0.16911	0.31757	0.189728	0.42969	0.57035	0.226102	0.244415	0.178737	0.176298	0.334776	0.155896	0.213608	0.207062	0.125488	0.194664	0.110196	0.263218	0.157831	0.215278	0.192518	0.241356	0.203869	0.333555	0.319142	0.117458	0.144247	0.155052	0.143226	0.115141	0.213064	0.123699	0.346538	0.117188	0.2133	0.0998613	0.17191	0.171136	0.216882
b0032	carA carbamoyl phosphate synthetase	0.113212	0.124943	0.171441	0.23081	0.107054	0.117927	0.100235	0.1973	0.375112	0.394837	0.988641	0.143732	0.293044	0.248073	0.289661	0.24735	0.196645	0.176545	0.210204	0.107992	0.157884	0.141828	0.22389	0.104919	0.0783851	0.0869756	0.197711	0.103681	0.411926	0.311818	0.31985	0.0939447	0.218772	0.249714	0.0916739	0.0998824	0.103841	0.122151	0.0690454	0.0941839	0.0819918	0.293255	0.0826129	0.198248	0.0896727	0.131386	0.134457	0.256126
b0033	carB carbamoyl phosphate synthetase	0.325497	0.39165	0.50253	0.489052	0.287631	0.269179	0.487583	0.865715	0.512238	0.587799	0.34063	0.505664	LQ	0.593489	0.476434	0.590451	0.237585	0.453356	0.494194	0.385677	0.49214	0.546628	0.451584	0.324882	0.549395	0.272553	0.505376	0.392094	0.658531	0.463516	0.528556	0.37164	0.607135	0.530025	0.777196	0.932711	0.409333	0.546115	0.477865	0.349411	0.330319	0.704821	0.387738	0.509266	0.378765	0.213133	0.667798	0.273705
b0034	caiF CaiF transcriptional activator	2.84552	2.28587	2.74122	2.0849	2.69646	2.2971	3.75624	1.42581	3.04343	1.75317	3.98182	1.81636	2.82055	1.28725	4.66413	2.75114	3.92553	2.37604	1.82601	3.38944	4.57923	3.21901	1.59989	0.936857	5.14895	1.96244	2.96142	1.46966	2.74662	3.00214	2.25486	3.07113	2.48207	1.68488	2.37026	LQ	4.25699	2.1106	4.60566	2.2911	1.9421	2.06954	1.84259	2.29863	1.21087	4.84576	2.69054	3.18031
b0035	caiE caiE protein	2.53023	1.87646	3.41899	2.11833	0.565063	1.02478	2.5301	0.946177	1.68909	1.68142	0.501865	1.45728	0.903469	1.21286	2.39127	2.40089	2.08647	2.00487	2.23719	2.8641	1.14499	1.36303	1.36143	1.03278	0.698394	1.48707	2.15181	1.98711	3.22333	1.85004	2.05274	2.31512	2.37661	1.82829	0.567046	0.906526	1.78533	1.86423	2.67501	1.57623	1.69834	1.8525	2.40024	3.68028	0.406268	2.7948	0.965256	0.97183
b0036	caiD crotonobetainyl-CoA hydratase / carnitine racemase	1.10648	1.2378	1.28338	2.09715	2.79043	1.71742	0.942939	1.23572	0.953427	2.01005	0.603735	1.81974	0.767336	1.46955	1.92512	1.48242	2.16941	1.21455	1.14792	1.73628	1.48502	1.29566	2.49827	0.560208	1.36137	1.17655	2.14086	1.0044	1.25827	1.35517	1.4825	1.39406	1.41212	0.560964	2.14627	1.98283	0.918595	1.10502	1.65551	1.98247	2.19026	1.28304	2.17574	1.6861	2.01384	3.5618	1.10201	1.88525
b0038	caiB CaiB monomer	1.28033	1.65739	1.07254	1.16236	0.282362	1.32751	2.04401	1.0388	1.74943	2.19141	8.25425	1.13835	1.52314	1.25212	1.18987	1.13424	0.943592	1.30822	1.4529	1.43393	0.575821	0.666405	1.92958	0.496637	1.14523	0.616572	1.39892	0.736972	1.16986	0.945802	0.994039	0.788627	2.66171	1.01269	0.147768	0.174537	0.861091	1.20858	0.617096	1.27335	0.753509	0.695033	1.20786	1.05687	0.197169	2.11364	0.506553	1.46591
b0039	caiA crotonobetaine reductase	1.76437	1.89614	1.68975	0.995881	0.782955	0.74824	2.73105	0.81433	1.90061	1.4442	1.01456	1.43754	1.11917	3.69758	1.47002	1.56195	1.39526	1.50535	1.50164	1.64614	0.818946	0.76002	1.59249	1.93222	3.34518	0.952319	1.49189	0.864027	2.10331	1.14079	1.13833	1.49533	1.52018	1.2207	0.422046	0.442817	1.49203	2.20216	1.85778	1.08947	0.421663	1.06315	0.357864	1.10836	1.54739	2.50244	1.13049	0.750166
b0040	caiT CaiT carnitine BCCT transporter	2.27131	1.50521	1.18143	1.99351	0.535493	0.876297	0.805945	0.819421	1.45716	0.556596	0.877372	0.653479	0.593087	1.41897	1.67648	0.401533	0.683935	1.42232	1.3605	0.93139	1.95321	2.01825	0.585579	0.418789	0.922763	1.35504	0.588243	1.68788	1.15098	2.49933	2.54998	1.22198	0.761328	1.14552	4.59685	4.89654	2.59136	1.95301	4.17677	1.40461	0.92786	0.616752	2.86771	1.14208	2.40356	0.774317	3.36061	0.353495
b0041	fixA probable flavoprotein subunit required for anaerobic carnitine metabolism	2.02547	2.46564	2.95147	2.01228	1.41822	2.3711	2.37987	2.27217	1.5356	1.23605	0.302995	0.543797	0.868449	1.49331	2.12713	1.93218	1.69171	1.61047	1.26324	1.23704	0.405553	0.439082	0.881165	0.137265	0.762251	1.24418	1.35766	1.90999	1.9423	1.5017	1.49075	1.51636	1.97849	2.33991	2.11471	1.83792	2.36841	3.68059	2.20421	1.10101	0.818313	1.09878	1.14775	1.98172	1.32995	2.22637	3.41794	2.95837
b0042	fixB probable flavoprotein subunit required for anaerobic carnitine metabolism	0.529008	1.07396	1.05516	1.91112	0.389111	0.368216	1.05369	0.428577	1.04831	0.838604	0.282637	0.453451	0.687373	2.10328	0.923822	1.41757	0.91373	0.985434	0.883264	0.888982	0.875351	0.860478	0.49544	0.727736	0.769309	0.494781	1.37434	0.698514	0.879181	0.770773	0.775831	0.738294	1.10857	0.765619	0.180492	0.248254	0.717251	0.850514	0.646034	0.571015	1.07928	1.37425	0.442806	1.06255	0.17499	0.989388	0.365651	0.81019
b0043	fixC flavoprotein (electron transport), possibly involved in anaerobic carnitine metabolism	1.25778	0.877616	0.3669	0.27117	0.482534	0.670729	0.373895	0.316917	0.902949	1.07771	0.180779	0.45192	1.30259	1.77808	0.846984	0.196168	0.711153	0.855169	0.90326	0.832599	0.588346	0.558019	0.117244	0.369594	1.17824	0.331481	0.669932	0.457332	0.723872	0.445688	0.518105	0.579841	0.510593	0.342714	0.547857	0.4185	0.746203	1.12676	0.614433	0.70486	1.47564	0.344248	0.641354	0.383692	0.088884	1.13693	1.01136	0.170733
b0044	fixX putative ferredoxin possibly involved in anaerobic carnitine metabolism	0.504134	1.50234	0.573257	0.997086	0.483022	0.657321	0.757397	1.4981	0.913612	0.767474	0.321283	0.581158	0.587377	1.09522	1.10886	0.520313	1.56725	0.935748	1.04687	0.714453	0.285675	0.473843	0.425937	0.306784	0.356077	0.507731	1.64848	0.436888	1.43	0.561861	0.77441	1.00745	0.673022	1.89236	0.186169	0.242636	0.77804	0.604985	0.24051	0.646251	3.91856	0.979827	0.551947	0.486864	0.284463	0.330744	0.387419	0.313563
b0045	yaaU YaaU	2.58682	1.47678	2.13812	1.58928	0.942311	1.08684	2.04773	1.77875	1.23882	1.78801	4.35009	1.01804	2.36447	1.48714	0.996337	0.876761	1.45301	1.68223	1.8749	1.10241	2.66084	2.85917	0.677038	0.902145	2.5499	1.21479	1.85125	0.889895	1.36121	1.80619	1.88834	1.39388	1.86815	2.75506	0.123358	0.101438	1.14998	1.05007	1.2679	1.13222	1.38162	1.30629	1.9001	2.26814	0.101247	2.13041	0.742874	2.84653
b0047	kefC KefC potassium CPA2 transporter	0.568537	1.66572	0.863381	2.29838	1.31906	1.03486	1.54779	1.78248	1.29244	1.17118	0.451254	0.84214	1.05964	1.73864	1.52827	0.649807	1.21095	1.71586	2.12498	1.45385	2.29935	2.90784	1.56036	0.209017	1.57432	1.26276	1.6951	0.857418	2.26132	1.14601	1.19049	1.17601	2.75887	0.85335	0.602979	0.618005	1.12034	1.14088	1.52988	0.626555	0.938725	1.32459	0.86648	1.81521	1.02267	1.36939	0.540652	1.63617
b0048	folA dihydrofolate reductase	0.212498	0.576805	0.433236	0.629287	0.201638	0.811062	0.324043	0.413648	0.2879	0.993141	0.230367	0.362837	0.692025	0.538125	0.410885	0.364193	0.912466	0.899312	0.939618	0.266473	0.630977	0.736909	0.37007	0.161095	0.178385	0.463544	0.694449	0.342056	0.451711	0.417756	0.386514	0.893446	0.407869	0.479803	0.282655	0.395743	0.514629	0.28866	0.713615	0.522015	0.190723	0.641178	0.194193	0.927423	0.189668	0.331429	1.14912	0.90185
b0049	apaH diadenosine tetraphosphatase	0.405552	0.514598	0.506188	0.264201	0.345396	0.157844	0.978886	0.363867	0.228872	0.648244	0.564768	0.781048	0.498003	0.235668	0.643672	0.275541	0.447561	0.312412	0.337198	0.640152	0.184886	0.192458	0.261309	0.128013	0.228843	0.151683	0.438072	0.280067	0.538585	0.468565	0.481072	0.463351	0.3015	1.43179	2.17778	2.92564	0.225435	1.32486	0.250455	0.353808	0.127953	0.489151	0.116658	0.239545	0.134167	0.232052	0.368737	0.281237
b0050	apaG hypothetical protein	0.458374	0.815169	0.344678	0.699303	0.179402	0.216033	0.399494	1.62859	0.593572	0.545654	2.06962	0.957714	0.568178	0.401833	0.993346	0.469228	0.97555	0.75927	0.876878	0.535868	0.205415	0.293992	0.412584	0.273721	0.481219	0.240312	1.14554	0.2248	1.98484	1.88455	1.66214	0.796896	0.58667	1.48721	9.54418	8.60548	0.820575	2.80215	1.35497	0.602741	0.28601	0.704256	0.202709	0.457915	0.365683	0.33334	2.47251	0.779563
b0051	ksgA S-adenosylmethionine-6-N',N'-adenosyl (rRNA) dimethyltransferase	1.21795	0.786241	0.427968	0.894652	0.122382	0.142552	0.316401	0.423438	0.242036	0.376015	4.84757	1.94885	0.207165	0.292026	0.456615	0.289392	1.1611	1.21952	1.21157	1.60562	0.436894	0.270405	0.716267	0.579171	0.877013	0.648854	0.767917	0.145382	1.40051	0.653572	0.697874	0.445121	0.327278	0.62349	0.281739	0.473553	0.39332	0.451042	0.499858	0.299967	1.98174	0.851274	0.223554	0.291252	1.50315	0.47652	0.442184	0.655307
b0052	pdxA 4-hydroxy-L-threonine phosphate dehydrogenase, NAD-dependent	0.203808	0.202709	0.163078	0.401478	0.096504	0.119256	0.135815	0.207814	0.116984	0.193374	0.609746	0.523885	0.117558	0.350013	0.258638	0.261989	0.414347	0.390989	0.36643	0.17838	0.125344	0.145815	0.281536	0.119952	0.201486	0.256257	0.438863	0.101046	0.334454	0.155945	0.182049	0.164512	0.509387	0.281016	0.114713	0.11176	0.240139	0.460298	0.0987703	0.118239	0.182595	0.471601	0.646737	0.186582	0.13104	0.132718	0.131541	0.518671
b0053	surA peptidyl-prolyl cis-trans isomerase (PPIase)	0.233353	0.168238	0.107923	0.112497	0.059474	0.0834027	0.122445	0.0870357	0.277404	0.137698	0.166672	0.113303	0.154385	0.351479	0.221232	0.240321	0.198314	0.152095	0.15661	0.127219	0.0754496	0.0782473	0.16394	0.0699359	0.100872	0.0853719	0.172359	0.0770632	0.151461	0.113856	0.100102	0.134637	0.178898	0.162128	0.0664059	0.0588235	0.140249	0.0808915	0.130342	0.167451	0.0610253	0.339486	0.073143	0.111715	0.0690547	0.126107	0.125725	0.165941
b0054	imp exported protein required for envelope biosynthesis and integrity	0.508438	0.307151	0.33944	0.283636	0.206003	0.285864	0.228649	0.500316	0.227562	0.576467	0.321129	0.63511	0.150421	0.839576	0.145065	0.428803	0.292815	0.505578	0.655059	0.175151	0.800438	0.97019	0.481296	0.193663	0.233532	0.187823	0.406994	0.407271	0.379923	0.393736	0.401234	0.321439	0.384606	0.427935	0.242596	0.173607	0.146149	0.227173	0.934841	0.490933	0.256838	0.632482	0.338078	0.507873	0.262772	0.13914	0.281876	0.378174
b0055	djlA chaperone with DnaK	1.54582	2.98838	1.869	1.6715	3.08914	2.24219	1.18373	1.97294	2.5156	1.09781	0.901334	1.17595	0.766909	1.89119	2.52258	4.09364	1.92335	1.94643	2.02394	2.23106	0.732008	0.856212	1.10867	0.560728	1.37952	1.53265	2.4009	2.69416	3.5468	2.37348	2.77703	2.61413	1.00383	2.10519	0.32833	0.400694	4.14095	3.00904	5.00673	2.16351	0.789527	2.67336	3.62164	2.79426	1.91689	1.90586	1.15096	1.48575
b0056	yabP predicted protein	9.46368	7.76957	10.2381	6.29281	6.66277	9.4511	11.5186	5.1353	6.28487	7.75544	11.1622	7.55905	7.66193	3.0438	7.93619	5.89706	8.1416	8.77141	8.14409	13.5303	6.72302	6.98047	5.40955	10.4382	13.3734	6.62356	8.31268	6.79414	5.4772	9.15401	10.4403	8.78964	9.17629	8.98293	4.44723	6.03329	9.69782	4.45607	6.65894	7.85866	10.1286	6.15492	10.0901	6.57483	7.03382	10.43	7.6992	15.6408
b0057	yabQ predicted protein	0.825157	0.878132	0.793312	1.04827	0.594099	0.747458	0.990208	0.855936	1.10407	1.05283	1.03298	LQ	1.81643	1.29169	3.70364	1.55812	4.08137	0.897261	1.00638	1.31752	0.843977	0.765513	1.38505	0.676947	1.24117	0.649771	1.2952	0.803288	1.23424	0.867563	1.04365	LQ	1.68085	1.42485	0.5154	0.643024	LQ	0.849357	0.965643	0.734776	0.615213	1.82602	0.575423	1.21575	0.54321	1.31628	0.671612	1.64771
b0058	rluA 23S rRNA and tRNA pseudouridine synthase	2.46281	2.39811	1.81386	1.56974	1.18514	0.97729	0.879345	1.90081	1.50809	1.80012	1.78938	0.855142	2.68737	2.77504	1.32621	0.553633	2.01347	2.11009	2.06416	2.05194	1.17227	1.39183	1.03405	0.614224	1.05199	1.51997	1.75964	2.53167	2.06459	0.987971	1.1651	0.88898	0.999029	0.918601	0.360452	0.547065	0.827412	0.887524	2.05591	1.42902	0.869429	2.35208	0.85095	1.53498	0.525984	2.04812	0.831078	1.16846
b0059	hepA RNA Polymerase (RNAP)-binding ATPase and RNAP recycling factor	0.759659	1.3626	1.3319	1.15734	0.546906	0.982712	1.11792	0.719618	1.14492	0.892444	1.11684	0.832318	1.19095	1.66158	0.573573	0.485262	1.78888	1.85318	1.92607	3.68852	2.59625	2.56268	1.75957	0.578301	1.21913	0.909924	1.52766	1.05599	1.96306	1.51952	1.57422	0.31137	0.484015	0.947308	0.377424	0.422668	0.703794	0.911665	1.32	1.18559	1.86716	1.62384	1.19819	1.99097	0.622755	1.7557	0.197406	1.624
b0060	polB DNA polymerase II	1.07717	1.1403	1.10808	0.977799	0.690691	0.487839	1.08701	1.16974	1.18043	0.956696	1.23203	0.662899	0.931796	1.33839	1.06662	1.29453	1.01003	1.0365	1.14837	1.03708	0.498846	0.525725	1.52896	0.662902	1.39324	0.483746	1.26835	1.00431	1.00113	0.814502	0.810295	0.737199	0.63227	1.26713	0.246849	0.206759	0.625572	0.864415	1.49111	0.549356	1.37778	1.0527	0.430781	1.44722	0.258756	1.46492	0.704585	1.2255
b0061	araD L-ribulose-phosphate 4-epimerase monomer	0.505057	0.996496	1.29743	1.23395	0.33273	0.498082	1.1982	0.552318	0.650082	1.04779	0.281024	LQ	1.10553	2.55443	0.985273	0.290198	0.96756	0.824794	0.808205	0.925897	0.992224	0.908349	3.09547	0.176327	1.41723	0.614706	1.26653	0.298629	0.362054	0.600501	0.664725	0.626052	0.274284	0.809559	0.251019	0.213575	0.495905	0.451588	0.415934	1.19502	0.138348	0.97081	2.6684	1.23123	0.196861	1.311	0.211828	0.818967
b0063	araB L-ribulokinase monomer	0.502882	1.05228	1.10224	1.58318	0.390773	0.815346	2.44033	0.489206	1.15769	1.07497	0.292161	0.439869	0.742176	3.87967	1.32911	1.78465	1.4256	1.57622	1.49559	0.818837	0.328932	0.369264	1.80048	0.170076	0.859654	0.369056	1.26873	0.559513	1.22155	0.457182	0.528761	0.473146	0.771586	1.11832	1.79603	2.19577	0.714115	1.82983	0.735974	0.819059	0.300777	1.14015	0.768796	0.984473	1.07584	2.06292	0.319377	1.36181
b0064	araC AraC-Arabinose transcriptional activator	0.601038	0.82259	0.941392	1.22947	0.188038	0.597109	0.579941	LQ	0.728546	1.59358	0.624044	0.371553	0.912057	2.07108	0.984333	1.17992	1.10441	2.12827	2.32316	0.996097	0.333373	LQ	0.528779	0.258295	0.16198	0.650245	1.02172	2.34939	0.771625	0.788158	1.28984	0.640317	0.478677	1.17184	0.280547	0.402072	0.548895	0.455567	0.69049	1.16099	0.153908	0.529909	0.987837	1.26228	0.10862	1.7806	0.365141	3.29009
b0065	yabI conserved inner membrane protein	0.242564	1.35087	0.873247	1.02241	0.11137	0.226321	1.18409	0.328081	0.719959	0.80139	0.15694	0.185447	0.526175	2.35491	1.24691	0.714959	2.39623	2.53895	2.27325	1.94451	0.292999	0.303125	1.2038	0.381745	0.406032	0.544494	1.12343	0.248523	2.19579	1.54782	1.31823	0.944275	0.279669	0.824519	0.260792	0.282772	0.467684	0.229274	0.33348	1.27859	0.684707	0.389098	0.209471	0.759977	0.23087	0.622365	0.286085	1.83469
b0066	thiQ SfuC	0.597614	1.45365	0.745856	0.765034	0.308407	0.681122	0.720771	0.493699	1.14875	1.8886	0.62737	0.879886	1.69785	2.57124	1.11548	0.572775	1.08475	1.53662	2.06858	0.703477	0.925881	0.951786	1.28492	0.382352	0.289362	0.610954	1.46293	0.329945	1.44078	0.898631	1.07733	0.669683	0.641987	0.574022	0.419745	0.376651	0.672163	0.660869	0.296449	0.965913	0.141541	1.38289	2.36589	1.20208	0.161159	1.04934	0.246013	0.884807
b0067	thiP SfuB	0.609477	1.11872	0.725759	0.913072	0.740672	1.24101	1.29725	0.594235	0.85085	1.6215	0.704159	0.466736	0.54661	1.68721	0.942347	1.12319	1.25954	1.22681	1.27899	0.701919	0.540442	0.521017	1.1089	0.25045	0.445541	0.421173	1.44243	0.544749	1.06917	0.641317	0.667961	0.848429	1.08574	0.885783	0.818429	1.01339	0.689985	0.477696	0.516105	0.839666	0.420837	1.85701	0.300687	1.51385	0.218094	1.38653	0.326085	0.703901
b0068	tbpA SfuA	0.971687	1.10672	0.424211	0.660989	0.456744	0.714874	1.20115	1.11637	1.26484	1.85519	0.276099	0.679827	1.18617	1.63896	0.854208	1.23795	1.28762	0.765003	0.741301	1.24629	1.22393	1.25472	0.393831	1.07184	3.41835	0.180481	1.57938	0.602795	1.35189	1.13533	1.0323	1.21404	0.394846	1.40518	0.28611	0.301819	0.602211	1.63228	0.87066	1.10503	1.19469	1.62547	0.44426	1.26523	1.05916	1.23585	0.514872	0.939992
b0069	sgrR SgrR transcriptional dual regulator	1.29658	1.33951	1.77333	1.61676	0.713264	0.74555	1.67514	0.816999	1.26328	1.33052	0.669772	1.07975	1.86509	1.42539	1.76504	0.448573	1.15589	0.751918	0.748452	0.907846	1.31432	1.26796	0.47298	1.30133	2.03386	0.743388	1.65917	1.15274	3.35816	3.57631	3.54128	1.01347	1.81586	1.37006	0.481998	0.445736	0.740098	1.51179	0.908389	1.08563	0.198732	1.3617	1.08808	1.16096	0.846845	1.54967	0.380204	1.42704
b0070	setA YabM MFS transporter	2.00873	2.48459	1.59923	3.83298	2.42049	2.48882	1.2648	3.81583	2.71809	2.27875	0.304442	2.36133	2.00885	1.77805	2.72234	2.94582	2.03908	1.40608	1.63051	2.26339	2.41239	2.32294	2.99351	2.10903	0.540746	1.41765	2.53129	4.30024	2.62315	2.14406	2.01354	1.94433	2.0753	1.50259	1.66443	1.35332	1.64295	2.94363	2.86055	2.64475	0.995727	0.715461	4.1038	2.60887	4.16013	1.41925	1.2887	3.68104
b0071	leuD isopropylmalate isomerase	1.23808	1.32516	1.54716	1.18538	0.340917	0.832019	1.59202	0.801668	1.22688	1.38568	0.272231	0.5453	1.78518	1.63768	1.72547	2.71231	1.22702	1.5476	1.52541	1.20356	0.272632	0.332688	0.676508	0.777497	0.77461	0.598716	1.62223	0.71309	0.708751	1.55506	0.908059	1.0322	1.28664	1.86714	0.502942	0.580972	1.00425	0.941465	1.80029	1.04892	0.682756	1.25505	1.07655	1.53304	0.906159	2.24588	0.593199	0.802813
b0072	leuC isopropylmalate isomerase	0.547086	1.12734	1.20858	1.10698	0.334395	0.583986	1.17605	1.1198	0.973272	1.07729	0.397981	0.522286	1.47499	2.14035	0.998406	0.686237	1.0547	0.836162	0.906504	0.852735	0.459534	0.559082	0.452763	0.287105	0.3191	0.397062	1.45455	1.58483	0.563043	0.580965	0.591736	0.676977	0.520977	1.94725	0.413796	0.4693	0.309098	1.38241	0.975237	1.62623	0.47086	LQ	0.803677	0.883862	0.231625	0.930465	0.320787	0.813409
b0073	leuB 3-isopropylmalate dehydrogenase	0.684896	1.12765	0.751676	0.9591	0.860739	0.431337	1.54134	1.91015	0.782564	1.00857	0.274085	0.559857	1.10538	1.31448	0.810533	1.08822	1.36163	1.08992	1.10125	1.01715	0.267533	0.34082	0.650172	0.766443	0.525331	1.87288	1.05842	0.892135	1.46748	0.420484	0.509878	0.743532	0.583695	0.682579	0.609284	0.675593	0.486822	0.683259	0.95048	0.615818	0.75282	1.04383	1.40118	1.31212	0.319362	2.26472	0.48554	0.857794
b0075	leuL leu operon leader peptide	7.86305	5.63617	4.89116	7.54403	10.1501	17.2178	1.09819	4.57076	0.979617	LQ	0.925731	5.09963	1.0464	2.66352	2.04997	2.76144	1.38128	LQ	LQ	0.985626	LQ	LQ	2.73203	10.0368	1.2232	13.4124	4.81511	13.3329	9.80045	4.2297	4.59925	0.862367	9.10101	2.81894	5.89327	4.96145	1.0117	8.72592	0.967861	LQ	1.97884	4.58744	9.15342	LQ	7.05236	1.2154	LQ	1.37009
b0076	leuO LeuO transcriptional activator	7.84544	4.65086	6.94172	5.69355	11.3194	8.0058	3.98397	4.48211	4.50793	1.78769	2.81854	4.90634	2.05604	1.74301	5.43522	4.90424	3.88869	3.89751	3.51799	4.00344	3.77923	3.94968	4.29133	4.64749	2.35344	7.06467	2.43442	6.41712	4.04301	6.99113	6.68855	5.40263	3.07662	3.15316	10.0354	11.6717	11.5521	7.16027	8.9203	5.79849	4.22973	2.99693	6.6444	4.24796	4.13397	1.74098	13.1856	2.4324
b0077	ilvI acetolactate synthase / acetohydroxybutanoate synthase	0.893356	1.24305	1.49743	1.65911	1.0644	0.730221	1.97897	2.17064	1.43239	1.60787	1.35333	1.67885	1.45086	1.62016	1.54825	0.856607	1.91198	1.54013	1.66784	1.59666	0.789574	1.08254	1.76667	0.781377	0.933833	1.98761	2.07044	1.63197	1.25531	1.25155	1.52466	2.29932	1.78658	1.27881	1.435	2.14799	1.20455	0.953257	2.1989	1.93534	0.527373	1.08755	1.39586	1.39923	1.74208	2.6967	1.26329	1.27194
b0078	ilvH acetolactate synthase / acetohydroxybutanoate synthase	2.10434	1.54179	1.93493	2.13633	1.5601	1.44907	1.12499	LQ	1.81519	LQ	1.22378	LQ	1.74749	2.0617	2.66187	1.29669	1.67324	2.06906	1.97117	1.77596	1.96763	1.86316	1.83532	2.00685	5.17582	2.17488	1.71567	0.801303	2.75847	1.92997	1.74569	1.89073	2.4903	0.856351	3.45456	3.67026	3.44553	2.58316	3.22438	1.14634	0.798992	1.0112	1.24931	1.57194	2.30796	1.13131	1.75554	0.692655
b0080	fruR FruR transcriptional dual regulator	1.96508	1.60184	1.76033	1.74984	0.909343	1.16532	0.619224	0.413188	1.09247	0.58338	0.73528	0.636641	0.717431	0.509095	1.8395	2.85806	1.24021	1.81199	1.53849	2.05992	1.27159	1.33625	3.56929	2.04994	2.36037	2.13212	1.73109	0.918774	1.00076	1.33895	1.30136	2.14564	3.31744	2.88536	2.54839	2.44524	1.7168	1.50516	2.413	1.43179	0.575743	0.998751	1.09025	1.72552	2.23269	0.996174	0.965802	2.22736
b0081	mraZ conserved protein	0.555702	0.520323	0.317233	0.917142	0.26731	0.51198	0.362705	0.437212	0.421852	0.395058	0.495391	0.376437	0.58547	0.405644	0.564933	0.453692	0.388799	0.385067	0.431523	0.388249	0.407106	0.503972	0.329712	0.393978	0.849703	0.239619	0.348818	0.371535	0.423105	0.493868	0.590083	0.360816	0.571025	0.430898	0.425515	0.598884	0.538246	0.307051	0.270361	0.396302	0.313914	0.450741	1.02849	0.313571	0.322006	0.482858	0.495883	0.492004
b0082	mraW S-adenosyl-dependent methyltransferase	0.256474	0.291884	0.29126	0.600433	0.203557	0.246066	0.271135	0.319443	0.15734	0.39533	0.220851	0.222524	0.17912	0.310973	0.295531	1.47873	0.184211	0.352281	0.289666	0.172941	0.435569	0.404371	0.493694	0.178226	0.152	0.194375	0.527441	0.163741	0.487857	0.305377	0.261506	0.167111	0.503287	0.547123	0.230888	0.209198	0.24319	0.253714	0.103005	0.200017	0.178501	0.582632	0.185377	0.49718	0.209115	0.192997	0.332288	0.222521
b0083	ftsL essential cell division protein FtsL	0.367809	0.433392	0.370258	0.455303	0.611542	0.332487	0.235539	0.472837	0.216453	0.444531	0.261047	0.341027	0.194565	0.714314	0.42976	0.652011	0.268878	0.426893	0.585821	0.271434	0.377652	0.506117	0.576733	0.301137	0.26106	0.547483	0.453529	0.367849	0.504712	0.31122	0.449366	0.245847	0.597285	0.594704	0.245055	0.365774	0.234391	0.456806	0.183139	0.353082	0.312488	0.668666	0.327882	0.452432	0.35515	0.256976	0.38766	0.272965
b0084	ftsI essential cell division protein FtsI; penicillin-binding protein 3	0.0876028	0.108137	0.086898	0.266491	0.0804585	0.0795913	0.0559214	0.128226	0.0871987	0.151703	0.0660141	0.195692	0.074814	0.172923	0.169258	0.158028	0.0767864	0.131819	0.166728	0.0731968	0.10665	0.133543	0.154959	0.0706643	0.914353	0.0850608	0.165271	0.0638026	0.134148	0.227176	0.208002	0.252882	0.246959	0.163825	0.0630436	0.0723099	0.060897	0.0851247	0.0469398	0.0743192	0.0655443	0.221886	0.0683575	0.132438	0.0802326	0.217719	0.104378	0.351652
b0085	murE UDP-N-acetylmuramoylalanyl-D-glutamate 2,6-diaminopimelate ligase	0.0773097	0.114127	0.125731	0.121339	0.076546	0.0845377	0.0922255	0.130276	0.0947881	0.125192	0.145408	0.24704	0.072673	0.15175	0.174409	0.166142	0.131815	0.15892	0.180811	0.106089	0.117644	0.143565	0.150326	0.0765319	0.108125	0.0661971	0.247995	0.0617403	0.190608	0.144571	0.110548	0.114493	0.157795	0.196184	0.0899972	0.0627082	0.0486446	0.100286	0.0473584	0.0928975	0.0624554	0.207408	0.0646313	0.236468	0.0844082	0.110641	0.42586	0.106882
b0086	murF D-alanyl-D-alanine-adding enzyme	0.101013	0.132872	0.284072	0.139648	0.0925803	0.0965404	0.084367	0.127072	0.0790618	0.141607	0.113541	0.108156	0.0743216	0.261567	0.123879	0.210074	0.146271	0.205348	0.174044	0.0838512	0.463487	0.385796	0.176524	0.0721003	0.0837202	0.0694121	0.25898	0.0656683	0.242659	0.154727	0.0835577	0.274924	0.183524	0.252041	0.126038	0.0693152	0.0924923	0.113513	0.0386054	0.082118	0.0616741	0.232092	0.0715628	0.266843	0.0955175	0.0777659	0.155593	0.0953679
b0088	murD UDP-N-acetylmuramoyl-L-alanine:D-glutamate ligase	0.113763	0.14671	0.173233	0.132174	0.0907954	0.104497	0.0786177	0.123272	0.181169	0.126188	0.107231	0.0905741	0.0686869	0.15253	0.13305	0.236442	0.121649	0.213829	0.153332	0.114186	0.202652	0.159174	0.214848	0.0730762	0.0808344	1.0557	0.291932	0.0780021	0.277102	0.160215	0.104289	0.0574066	0.227778	0.278309	0.119148	0.0677681	0.0572059	0.122925	0.045412	0.089144	0.0681827	0.28832	0.0663386	0.283929	0.0918748	0.0996122	0.177972	0.0967272
b0089	ftsW essential cell division protein FtsW	0.119471	0.158755	0.110035	0.136975	0.0816288	0.121991	0.0585653	0.162886	0.104937	0.147544	0.0888757	0.103711	0.0806552	0.181674	0.0997744	0.197906	0.0863763	0.229645	0.175892	0.072334	0.164385	0.148183	0.194736	0.0933555	0.0558838	0.116354	0.201165	0.104208	0.19416	0.151945	0.126485	0.0641849	0.189612	0.209827	0.0851515	0.0774817	0.0773384	0.125282	0.0944016	0.0885699	0.076	0.24647	0.0851993	0.162518	0.12031	0.0655625	0.0933647	0.0995226
b0090	murG N-acetylglucosaminyl transferase	0.147817	0.128772	0.142829	0.147399	0.088229	0.093068	0.121813	0.538606	0.10445	0.189512	0.162899	0.1459	0.108357	0.152705	0.139635	0.231657	0.150257	0.188548	0.157415	0.114746	0.312863	0.312187	0.188712	0.0766376	0.110807	0.0839683	0.297062	0.358478	0.229293	0.17597	0.101136	0.148541	0.209809	0.243806	0.115083	0.0567195	0.0855185	0.11876	0.0624835	0.0889993	0.0709142	0.279066	0.0683967	0.302703	0.104362	0.138451	0.13477	0.114889
b0091	murC UDP-N-acetylmuramate-alanine ligase	0.21221	0.0713367	0.0652219	0.0326382	0.0467151	0.0457512	1.2322	0.375063	1.11331	0.194594	1.34617	0.144778	1.02468	0.132699	1.47266	0.050575	1.35612	0.26112	0.120029	1.37912	0.0503311	0.190442	0.0986082	0.039971	1.18035	0.0211107	0.0876971	0.0232047	0.059724	0.0572985	0.0998563	1.25976	0.31871	0.07051	0.116224	0.0942543	1.26945	0.0636079	1.08324	0.109312	0.0299784	0.198347	0.160791	0.0809038	0.0910404	1.28079	0.0498614	1.30847
b0092	ddlB D-alanine-D-alanine ligase B	0.133814	0.147933	0.151714	0.154137	0.09707	0.234738	0.0999364	0.335712	0.103799	0.158929	0.111515	0.186484	0.125244	0.315634	0.204414	0.239882	0.208493	0.210721	0.168954	0.105973	0.200622	0.11259	0.231967	0.104228	0.0967058	0.107361	0.241141	0.0980666	0.195735	0.171335	0.125629	0.230194	0.282676	0.250653	0.149886	0.0718651	0.119969	0.383367	0.173521	0.16521	0.0813031	0.256724	0.117147	0.23365	0.104828	0.0968927	LQ	0.149216
b0093	ftsQ essential cell division protein FtsQ	0.168345	0.162435	0.171688	0.195987	0.113537	0.217056	0.0903454	0.18342	0.174121	0.210569	0.127413	0.158782	0.0911358	0.239982	0.38461	0.287444	0.215003	0.223936	0.196079	0.129491	0.186999	0.156475	0.275801	0.120382	0.0815708	0.179363	0.283332	0.13184	0.26081	0.169369	0.149197	0.185089	0.282498	0.313342	0.124277	0.0971489	0.10036	0.17571	0.161151	0.187865	0.125565	0.347603	0.132123	0.275389	0.168063	0.102668	0.169439	0.175154
b0094	ftsA essential cell division protein FtsA	0.191584	0.149837	0.151702	0.160463	0.110545	0.133891	0.0884589	0.192639	0.118549	0.207725	0.111294	0.154014	0.0958906	0.200551	0.165395	0.247942	0.165379	0.262884	0.189574	0.119682	0.192018	0.169793	0.254757	0.128258	0.0817554	0.250017	0.219249	0.134339	0.23659	0.251576	0.228509	0.189315	0.23097	0.263524	0.115288	0.108773	0.250073	0.166549	0.0741701	0.15055	0.117895	0.292972	0.275787	0.207824	0.147702	0.188483	0.139793	0.230925
b0095	ftsZ essential cell division protein FtsZ	0.130063	0.142744	0.148792	0.155829	0.0968709	0.132962	0.103042	0.189505	0.0845057	0.226585	0.0879965	0.156889	0.0928222	0.204581	0.15645	0.226785	0.0932742	0.208928	0.185612	0.0803994	0.1601	0.154894	0.236068	0.109192	0.0626676	0.133732	0.228959	0.133989	0.209122	0.130226	0.134696	0.139394	0.209268	0.27692	0.097241	0.0888377	0.0646046	0.135831	0.120998	0.120006	0.0963521	0.332036	0.101241	0.176735	0.124106	0.0830275	0.148694	0.136264
b0096	lpxC UDP-3-O-acyl-N-acetylglucosamine deacetylase	0.108787	0.173343	0.160277	0.163671	0.103305	0.140095	0.18176	0.51288	0.148514	0.263033	0.115128	0.182392	0.201749	0.38025	0.211372	0.337372	0.142648	0.192556	0.145139	0.135852	0.143427	0.148955	0.202985	0.108294	0.0910519	0.173207	0.342658	0.167583	0.219605	0.128109	0.109437	0.182886	0.237883	0.441129	0.107339	0.0800881	0.111138	0.129194	0.0933239	0.208815	0.0852976	0.258433	0.108465	0.274331	0.117535	0.115016	LQ	0.310861
b0097	secM secretion monitor that regulates SecA translation (General Secretory Pathway)	0.0903605	0.140925	0.232745	0.263554	0.131674	0.464227	0.183649	0.179193	0.257598	0.24658	0.192884	0.139752	0.30007	0.180552	0.230625	1.99739	0.172614	0.148047	0.169919	0.266636	0.0938798	0.153796	0.145611	0.0771152	0.121131	0.145936	0.189135	0.098133	0.19054	0.137927	0.127066	0.210352	0.178763	0.24298	0.0831064	0.0678293	0.539544	0.0943688	0.15141	0.146956	0.066947	0.223291	0.0876038	0.185209	0.0872266	0.140323	0.12609	0.50792
b0098	secA Sec Protein Secretion Complex	0.27023	0.323414	0.357144	0.269166	0.345739	0.208506	0.204294	0.501707	0.262247	0.310939	0.315329	0.358047	0.320458	0.429768	0.196374	0.442968	0.227284	0.375062	0.371921	0.266677	0.55641	0.458506	0.386375	0.21936	0.141881	0.259666	0.4169	0.314109	0.396182	0.234224	0.281099	0.327294	0.441352	0.446202	0.182509	0.205151	0.212099	0.430624	0.184864	0.308078	0.232833	0.634431	0.29261	0.367413	0.250487	0.262613	0.252297	0.269861
b0099	mutT dGTP pyrophosphohydrolase	0.906897	0.836411	1.09313	0.694927	1.06172	0.861771	2.14551	2.27533	1.86249	1.52875	3.98392	3.09215	0.85375	2.04139	0.889461	0.579308	1.0832	1.89453	2.10683	1.42503	1.71927	1.66532	0.990628	0.289497	0.42506	0.334417	1.23243	1.14617	1.22019	0.818723	0.766976	1.23704	1.8409	0.720001	0.937874	0.92733	0.558888	1.43781	0.931062	0.852274	0.268168	1.8539	2.88928	0.585427	2.35712	2.53892	0.43665	3.13156
b0101	yacG conserved hypothetical protein with a zinc finger	0.836072	1.02373	1.53876	0.869329	0.452547	1.47887	0.697466	LQ	1.1832	1.1195	1.21734	1.06494	0.731256	1.27356	0.720364	1.02975	1.18213	1.0402	0.949355	1.41476	3.24734	3.0561	4.46552	0.537578	0.381063	1.13753	1.18021	1.87821	1.11198	0.866096	LQ	1.99092	0.943865	1.1701	0.492399	LQ	0.627281	0.626911	1.84757	0.623941	0.522078	1.36915	2.78573	1.03162	0.561221	0.730903	0.856349	0.909598
b0102	yacF conserved protein	1.32855	0.845379	1.94929	1.06322	0.449122	0.621492	0.531406	0.429448	0.850796	0.527562	0.761851	0.806745	0.712362	0.835024	0.527596	0.319632	0.579973	0.403172	0.429101	0.576512	0.361083	0.400595	2.8502	0.817553	0.147918	0.579832	0.987619	0.365025	1.70474	1.22345	0.954525	1.50091	0.824922	1.55432	0.107805	0.148898	0.550387	0.507676	1.20975	0.719718	0.164418	1.18968	2.01291	0.549632	4.0555	1.26406	0.393365	1.3204
b0103	coaE dephospho-CoA kinase	0.29452	0.345755	0.384784	0.568482	0.53057	0.510204	0.347561	0.35947	0.477837	0.681669	0.293377	0.606506	0.811696	0.641253	0.629733	0.561623	0.428061	0.824709	0.822117	0.505329	0.220794	0.268599	0.40228	0.229047	0.227961	0.239427	0.546247	0.340154	0.406406	0.328033	0.419068	0.49523	0.555051	0.51844	0.171105	0.245666	0.288179	0.598736	0.492096	0.36079	0.258291	0.606282	0.348544	0.493162	0.744032	0.423937	0.242585	0.468213
b0104	guaC GMP reductase	0.520536	1.77133	0.984452	1.33527	0.371786	1.28836	1.82339	0.324638	1.49836	2.08041	0.978072	1.06072	2.71304	2.72961	1.55788	2.14285	2.13945	1.65872	1.8174	2.7208	0.47907	0.614351	0.362187	2.35035	4.99216	0.441763	2.21395	0.980061	2.40452	1.42386	1.62364	0.999237	1.85797	1.54857	0.577574	0.762984	0.884318	1.77975	0.462498	1.8323	1.31426	1.61684	1.71224	1.23333	0.760001	1.3553	0.194411	0.52435
b0105	b0105	0.728569	2.11586	1.62444	4.83333	1.15094	0.872441	1.01235	LQ	0.955317	LQ	1.28303	0.915263	1.26769	1.17561	1.20912	4.07584	1.00885	2.52729	1.20609	1.22842	LQ	1.07458	1.48746	0.565272	0.890802	0.79016	1.68475	0.632328	4.75203	1.76863	1.663	0.8141	1.00935	0.996217	LQ	0.747132	0.769417	2.70364	0.732595	4.10803	0.389771	6.47183	3.39864	LQ	0.858735	1.33322	0.544033	0.953815
b0106	hofC protein transport protein HofC	1.03919	1.53842	1.16967	0.958528	2.00357	0.976063	2.06573	0.888055	1.86592	2.43261	1.20533	0.86427	1.00079	2.69433	1.73675	1.55442	2.00319	2.02149	1.89802	1.60369	2.4135	2.63725	1.83092	0.299333	1.23937	0.918468	2.21276	0.816433	2.0148	1.58455	1.44148	1.5766	1.09273	0.852319	0.307572	0.233682	1.16755	1.49457	1.29928	1.16959	1.21965	1.48229	1.52083	2.28627	4.40938	2.56097	0.575605	1.53593
b0107	hofB protein involved in plasmid replication	2.24143	2.01846	2.24957	0.93654	0.429818	0.569703	1.83462	2.44658	1.98716	2.06322	2.57731	0.767052	1.08847	2.89598	2.28409	0.708888	1.80927	1.74046	1.66234	2.61103	0.901674	0.979089	1.73664	1.04304	1.42708	1.36173	2.08786	1.50967	2.25512	1.64236	1.59143	2.10271	1.18538	1.01858	1.02655	1.0995	1.27466	1.19453	1.32184	2.1715	0.812633	1.73494	1.5444	2.12203	0.522033	2.62712	1.08018	4.91579
b0108	ppdD prepilin peptidase dependent protein	1.36249	1.28148	1.30686	1.77528	1.05157	0.655129	1.05831	0.727767	2.79614	2.02029	1.62114	0.750296	1.09588	3.46861	2.22163	0.869027	1.94085	1.1578	1.16807	1.22998	1.66596	1.72169	2.10066	0.828538	1.17336	0.821926	1.63378	0.477726	1.91582	1.1582	1.14939	1.52925	0.439091	0.864023	0.14199	0.19766	2.24951	2.82678	0.852063	1.85808	0.408327	1.90498	0.778523	2.01605	3.25074	0.813291	1.01747	1.00019
b0109	nadC quinolinate phosphoribosyltransferase (decarboxylating) monomer	0.455121	0.737758	0.589585	0.497514	0.214084	0.444568	1.5064	0.517139	4.61051	3.20922	0.809767	1.68328	4.57813	6.1738	0.641931	0.596445	0.342895	0.39727	0.382348	0.606426	2.43822	2.61987	0.99601	0.887788	0.550947	0.497477	0.66272	0.970608	0.467395	0.519936	0.577553	0.475066	0.473636	0.933166	0.119099	0.130952	0.697001	0.786717	1.65809	0.843261	0.325953	0.756493	0.237892	0.457433	0.588644	0.521361	0.46476	6.34665
b0110	ampD N-acetyl-anhydromuramyl-L-alanine-amidase	0.656672	1.43078	1.16627	1.06072	0.172504	0.842809	1.26384	0.792307	3.95376	3.22187	0.795173	0.57206	3.69785	4.82869	0.416287	0.325681	0.510563	0.281382	0.312765	0.559702	0.882984	1.15938	1.3841	2.55502	0.556241	1.25337	1.38855	1.11185	0.517522	0.542899	0.591603	0.845213	0.579145	0.97376	0.12553	0.166959	1.28649	0.302229	0.487587	0.868939	0.153942	0.581308	0.286282	2.65873	4.32015	0.425439	0.198744	1.69324
b0111	ampE predicted inner membrane protein	1.06979	1.67937	1.16926	1.53371	1.21367	0.966858	2.24381	1.40996	2.01736	2.55158	1.55005	0.601972	2.06342	3.45086	1.0881	0.725652	1.42792	0.966268	1.15001	1.22433	2.86413	2.88367	0.734918	3.23721	0.548158	0.395717	1.65349	2.20897	1.69821	0.993306	0.970847	1.41273	0.774553	1.72828	0.300206	0.392378	0.859264	0.69906	1.21841	1.64803	0.463268	1.19856	0.24866	1.85717	2.14943	1.70532	0.436152	1.12945
b0112	aroP AroP phenylalanine/tyrosine/tryptophan APC transporter	3.05436	1.20192	2.22971	1.63897	2.44983	1.44155	1.58704	1.70871	1.55086	1.49306	0.927839	1.90898	1.82413	2.17383	1.28081	2.86011	1.47327	1.16488	1.16314	1.39641	3.6195	3.34507	0.943772	0.305298	0.44792	0.464166	1.60299	0.721878	1.60903	1.31241	1.20697	1.19464	2.30614	0.742392	4.92812	4.90393	1.79399	1.46492	1.6811	1.9775	0.575982	1.07011	1.17697	2.55284	0.855868	1.21825	1.08339	1.29249
b0113	pdhR PdhR transcriptional dual regulator	0.482279	0.199241	0.219449	0.243291	0.149254	0.172561	6.10906	9.0699	5.5786	4.54675	13.1689	16.2642	5.89241	9.97187	0.378203	0.23489	0.199511	0.322001	0.27331	0.271916	1.20834	1.06749	0.230797	0.130346	0.121957	0.149201	0.452991	0.432334	0.257163	0.202288	0.248529	0.289656	0.325199	0.247758	0.153351	0.240682	0.193774	0.198374	0.0734227	0.322703	0.178295	0.382817	1.33542	0.245552	0.386588	0.471395	0.189832	1.25049
b0114	aceE subunit of E1p component of pyruvate dehydrogenase complex	0.162532	0.240884	0.185598	0.193761	0.109663	0.121285	58.2775	54.0112	5.45586	10.5805	157.087	77.4281	10.3512	13.9964	0.155225	0.254426	0.161213	LQ	0.157758	0.16264	0.224911	0.196831	0.47879	0.11287	0.0684532	0.116331	0.478694	0.296977	0.217619	0.182945	0.149282	0.255945	0.247533	0.257802	0.229241	0.249876	0.0932446	0.13865	0.099267	0.22461	0.847737	0.601111	0.10562	0.235143	0.120744	0.420022	0.280126	1.61974
b0115	aceF AceF-lipoate	0.0575993	0.0868276	0.0309439	0.0616285	0.0115848	0.042918	34.2251	36.029	2.8876	5.28959	71.7888	50.5076	5.55477	7.93394	0.155766	0.00859382	0.131223	0.177699	0.0532707	0.149392	0.0094768	0.00854066	0.404377	0.462684	0.193607	0.230637	0.206214	0.0551639	0.013298	0.300974	0.233956	0.167486	0.0419267	0.070965	0.0059892	0.0130375	0.156152	0.0108194	0.0626032	0.0464077	0.209748	0.102107	0.021181	0	0.0755678	0.406046	0.0220107	0.370168
b0117	yacH putative membrane protein	1.95107	1.41941	1.38962	1.76172	0.299344	1.53652	1.25045	0.831755	1.88764	1.85391	2.79963	0.926878	1.61853	2.77696	1.36284	1.28405	1.07586	1.38814	1.43285	1.61735	0.919477	0.991522	3.02031	1.11366	2.45199	1.32562	1.52642	1.62498	3.78026	1.97241	1.85556	1.28949	1.79069	1.23135	0.687291	0.76264	2.39297	1.16751	1.12042	1.51733	2.17412	1.88848	1.87483	1.55753	0.55209	1.37965	0.60325	0.730679
b0118	acnB aconitase B	0.201604	0.200795	0.160168	0.184359	0.11758	0.284408	1.19429	0.913264	1.35567	1.1457	1.20811	0.986924	0.812398	1.50544	0.318463	0.207888	0.258969	0.405386	0.376632	0.119673	0.416301	0.359073	0.85189	0.240441	0.634938	0.337351	0.328497	0.289559	0.214038	0.162589	0.188641	0.310664	0.343057	0.392954	0.0893279	0.104507	0.131869	0.168353	0.200418	0.230998	0.109136	0.666097	0.11086	0.22569	0.997398	0.321853	0.1749	0.54322
b0119	yacL conserved protein	0.393095	1.75672	0.592753	1.08459	2.94174	1.64347	1.0265	3.59215	1.6899	1.53443	0.449882	2.68006	1.08247	1.82761	1.61123	0.457628	2.40285	1.19703	1.08536	0.89116	2.27996	1.3984	0.39769	6.06036	0.653235	2.03854	2.00026	2.22836	2.84922	1.4099	1.31846	1.11116	1.24057	1.92821	0.200331	0.225874	1.25232	2.53544	1.37179	1.32779	1.0924	1.73146	5.75262	2.207	5.14171	0.447234	1.45714	1.00874
b0120	speD adenosylmethionine decarboxylase, proenzyme	0.875855	1.20186	1.68627	1.04574	0.384043	0.661278	4.31802	1.41581	0.683237	0.764621	1.49785	2.57237	1.3952	1.10979	0.522518	0.515442	0.735299	0.843159	0.863076	0.371994	0.318692	0.365111	0.82446	0.336213	1.97785	1.36779	1.34525	1.83906	1.46565	0.644347	0.64413	0.88287	0.62088	0.961654	2.82897	4.16605	0.756122	0.631003	0.288559	0.913211	0.214004	1.84151	1.23015	0.760508	0.495725	1.02723	0.309465	1.30705
b0121	speE spermidine synthase	0.320378	0.760312	0.582003	0.56261	0.561248	0.540035	2.91798	1.79049	0.586295	0.437704	3.82394	0.939396	0.49315	0.771763	0.497929	0.45081	0.617092	0.883199	0.899103	0.348433	0.416024	0.525907	0.46348	0.206988	1.6388	0.270518	0.974639	0.547608	0.993578	0.868677	0.797452	0.725763	2.14988	1.04761	1.31351	1.6094	0.662344	0.87192	0.83726	0.9911	0.165185	0.59925	0.901355	0.427025	0.197277	0.271659	0.286815	0.248049
b0122	yacC predicted protein	1.82361	1.03665	2.78605	1.46948	2.07437	2.80162	0.78064	0.846845	1.49085	0.671131	0.381198	1.43061	0.964664	0.847603	3.3746	3.05223	2.95096	2.22771	2.38482	2.31077	4.34319	3.80026	1.41515	0.67517	1.5332	1.7369	0.920192	1.691	1.71538	1.36211	1.28681	1.48386	2.01531	0.767063	1.07447	0.943954	2.89223	3.43767	3.91265	1.16476	0.841221	2.40236	1.69691	2.61809	1.34904	0.885341	1.94118	0.865752
b0123	cueO multicopper oxidase with role in copper homeostasis	0.950899	0.95378	0.954196	1.24149	0.538087	0.917818	0.777467	0.898146	1.00758	1.12651	0.258494	0.609228	0.539743	1.20025	1.08817	0.408091	1.39113	1.27614	1.25468	1.76658	2.35049	2.54693	1.30324	2.20494	1.56734	0.714915	1.20591	1.09963	0.878446	0.602781	0.630895	0.780193	0.849275	0.670731	0.784498	0.853579	1.06976	0.964871	0.901977	0.803526	1.24726	1.59575	0.364376	1.43575	0.468763	0.748041	0.369082	1.76551
b0124	gcd glucose dehydrogenase	1.18647	1.25799	1.14669	0.56952	2.52336	0.610341	1.41228	1.11923	1.04545	1.42274	0.482704	1.16728	0.707079	2.55336	0.962784	2.42046	1.51416	1.32891	1.29252	1.34082	0.795421	0.798005	0.964609	1.48607	1.02669	0.834207	1.34264	1.44636	1.13572	0.674877	0.894914	0.896181	1.11375	1.20423	1.31211	1.3304	0.778738	1.19674	1.0082	1.0532	1.28101	2.03068	LQ	1.03135	0.89231	1.92607	0.891059	1.3539
b0127	yadG YadG/YadH ABC transporter	0.9173	1.06299	1.29055	0.457782	1.489	1.94789	0.593312	1.00735	1.0465	0.796704	0.186106	0.378409	0.933293	1.13965	1.54539	0.423943	1.04624	0.644056	0.747833	1.36642	0.213478	0.234596	1.12883	0.416629	1.47273	0.654574	1.18787	0.812348	0.761781	1.0115	1.06512	1.41936	1.28889	3.02465	0.204261	0.150408	1.80983	0.695197	0.634941	0.894769	0.275639	1.73971	0.775531	1.13051	0.161998	1.18884	0.584914	0.55832
b0128	yadH YadG/YadH ABC transporter	2.32935	1.03114	1.71227	0.244393	0.129982	0.251246	0.207225	1.69456	1.69784	0.559474	0.151393	1.86834	0.462848	0.606815	0.638229	0.250061	0.5583	0.331533	0.364685	0.58924	0.124407	0.178408	3.60137	0.536474	0.383432	2.04779	1.03362	1.28755	0.441414	0.889216	0.977406	1.39932	0.526583	0.537699	0.116775	0.11059	1.25831	1.70929	0.844967	0.498175	0.224946	0.438497	0.143138	0.359776	0.386978	0.24964	1.62713	0.734811
b0130	yadE predicted polysaccharide deacetylase lipoprotein	1.07239	1.2634	1.52	1.34676	1.51182	1.3144	1.30727	1.12801	1.74132	1.27701	0.673172	0.880228	1.59739	1.01394	1.61106	1.6135	1.47466	0.928477	0.978947	0.76533	0.429378	0.490478	0.86167	0.997481	1.41	1.80062	1.0652	0.451146	1.32693	1.74888	1.63186	0.902324	1.00521	1.27291	0.321783	0.389484	1.95993	1.46965	2.18112	0.972372	1.58615	1.3164	0.59144	1.59968	0.413962	0.928083	0.859028	3.54663
b0132	yadD predicted transposase	2.20579	1.96616	2.23801	2.1407	1.59988	3.34856	2.01485	0.880823	1.86175	1.66644	1.10193	2.19544	0.877782	2.21524	1.54824	1.24011	1.95995	0.858455	0.862657	3.86766	2.59482	3.30675	2.84328	0.228594	1.06703	1.7056	1.83959	1.24546	1.87018	2.06549	1.81784	1.42315	1.22086	1.63833	2.90623	3.69818	3.13053	2.43493	2.69963	1.85725	0.530031	2.08896	0.597242	1.63079	4.76751	5.99393	1.87285	2.94211
b0134	panB 3-methyl-2-oxobutanoate hydroxymethyltransferase monomer	2.10284	1.64723	1.90816	1.70031	0.662246	0.769576	2.79827	0.334568	1.10264	2.12603	1.23528	1.20044	2.86565	2.0801	1.14398	0.423476	0.827861	1.07646	1.22022	1.54792	0.357923	0.641811	4.21926	3.06218	2.57666	0.633697	1.39541	1.83991	2.25716	1.82944	2.25607	1.09806	1.94338	1.27002	1.09422	1.39659	1.19609	1.10464	0.725729	1.6508	2.79334	1.4709	0.532062	0.959933	1.65261	0.957797	1.12758	3.66671
b0135	yadC predicted fimbrial-like adhesin protein	9.25806	6.79902	8.4641	5.78275	7.9462	11.2473	4.6559	3.41767	6.03608	5.37962	3.88492	8.27206	11.3778	1.63201	8.409	4.22363	9.89833	6.23373	6.92036	11.6023	6.3193	6.64851	7.58552	9.86821	10.8975	9.43042	5.92393	7.66836	6.09857	8.0361	10.83	12.2776	7.27186	5.0998	6.27577	7.50301	12.9822	4.63858	8.00496	7.71963	9.72763	5.62836	8.28672	4.73887	7.26608	8.05537	11.8377	9.08727
b0136	yadK predicted fimbrial-like adhesin protein	5.26696	3.70635	4.90173	4.51844	6.70134	5.68885	1.70426	LQ	3.39601	1.8099	2.48213	LQ	1.49149	1.04749	6.08305	2.02322	5.65379	3.91461	2.5505	4.73053	5.76564	3.64936	2.01968	6.6168	5.85278	7.30941	2.46882	4.03547	2.92961	6.11521	5.15139	6.58193	2.13332	2.4074	13.4631	10.088	10.941	4.39421	8.4467	3.84955	5.14244	2.36148	5.46258	3.49533	8.48477	1.31232	7.55148	3.05055
b0138	yadM predicted fimbrial-like adhesin protein	24.3575	15.4412	19.5248	9.88216	12.6444	27.6155	1.34962	LQ	1.03306	LQ	1.27343	LQ	1.26188	LQ	1.4692	3.38612	1.5462	14.6989	LQ	1.20397	7.32874	LQ	15.8765	29.447	1.17721	21.4072	9.50778	LQ	7.71567	LQ	14.7724	1.00687	8.16726	13.4931	7.73816	LQ	0.921547	14.8901	0.874594	17.5198	21.6704	11.8773	13.8995	12.1965	7.41845	1.24962	16.5001	1.17196
b0139	htrE putative outer membrane porin protein involved in fimbrial assembly	9.78001	7.10068	9.01393	7.35929	11.5163	9.92798	5.40993	7.43269	6.5555	6.31364	2.47013	10.8048	4.00812	2.51226	7.74151	6.67622	7.02606	7.93947	7.28514	6.89846	12.3267	11.5938	6.91274	11.8576	7.21872	14.1621	6.24564	10.7926	8.29283	7.9498	8.21414	11.4896	9.87252	3.60251	16.1338	14.3946	12.3156	8.03723	9.93354	9.82171	11.0915	5.09171	9.81572	8.49168	10.2662	5.93919	13.082	6.01561
b0140	ecpD probable pilin chaperone similar to PapD	11.3797	7.88753	8.8552	8.50811	17.3365	13.7433	3.39032	7.87703	5.07071	4.51565	2.68149	16.2121	1.46708	0.887703	4.83472	4.0986	6.55651	5.92768	5.46304	8.7585	8.41091	7.95372	4.04402	15.6939	7.73414	17.9949	7.24949	13.166	6.64069	11.3442	10.3128	13.9427	10.2163	2.61568	17.5018	18.3308	12.7632	6.29232	9.45831	11.9669	18.7385	5.55321	16.4129	7.48996	17.1156	12.0779	17.1248	8.37465
b0141	yadN predicted fimbrial-like adhesin protein	5.72116	2.84889	4.5157	3.25482	4.57657	4.08243	2.82175	2.21994	2.95541	1.2459	2.91252	2.46918	1.48503	0.827926	3.22177	2.31982	2.22406	3.66928	2.02919	4.3148	3.83507	2.33154	1.12142	4.96418	3.59496	5.11397	1.36675	3.51555	3.02575	4.74851	3.4288	3.49034	3.28717	2.09359	6.29705	5.11504	8.80987	2.63055	4.85637	3.45527	5.14802	2.45892	3.85132	2.21595	3.67218	1.28879	8.20658	3.38753
b0142	folK 6-hydroxymethyl-7,8-dihydropterin pyrophosphokinase	0.7725	0.802698	0.527244	0.613169	0.341948	0.494644	0.31974	1.19383	0.971029	0.831667	0.333193	0.62633	0.670104	0.701059	0.588801	1.06285	0.75206	0.670693	0.772352	0.587274	0.503501	0.577786	0.370657	0.337085	0.371199	2.08009	0.379069	0.534978	0.373355	0.682432	0.907359	0.711424	1.09003	0.431237	0.295534	0.398034	0.706672	0.79065	1.3889	0.766193	2.69753	0.638062	0.46998	0.92423	0.360576	0.309264	0.887837	0.331982
b0143	pcnB poly(A) polymerase I	0.437632	0.425724	0.232542	0.190134	0.151447	0.192029	0.132071	0.622641	0.315302	0.406611	0.142864	0.707918	0.234811	0.253555	0.45651	0.303467	0.245043	0.506437	0.522415	0.187642	0.146837	0.207191	0.75618	0.123923	1.40176	0.264618	0.317558	0.199038	0.251057	0.382475	0.410898	0.35199	0.303503	0.307894	0.471063	0.402189	0.315877	0.214897	0.436325	0.491006	2.10344	0.570954	0.158809	0.259122	0.15109	0.339917	0.213332	0.117824
b0144	yadB glutamyl-Q tRNA(Asp) synthetase	0.443603	0.702481	0.539978	0.516812	0.371633	0.434387	0.602434	0.499244	0.540293	0.77447	0.194734	0.720911	0.542672	0.577257	0.409278	0.889353	0.424752	0.658916	0.659677	0.351542	0.40195	0.413466	0.945941	0.284611	0.300521	0.644141	0.760013	0.588748	0.783546	0.607703	0.596762	0.600546	0.898923	0.834617	0.544085	0.526255	0.409145	0.761108	0.177831	0.567868	1.02275	0.89117	0.457491	0.761562	0.54053	0.442744	0.605154	0.240849
b0145	dksA RNA polymerase-binding transcription factor	0.342029	0.447295	0.52493	0.492406	0.869741	0.559515	0.91211	0.812911	1.26543	1.37828	0.319031	0.876122	1.05792	0.95683	0.44412	0.577368	0.396313	0.438009	0.431688	0.442503	0.354448	0.331699	0.505669	0.261934	0.515816	0.805459	0.636813	0.618019	0.493436	0.347074	0.350394	0.477613	0.616237	0.524111	0.271444	0.24655	0.367999	0.852846	0.508997	0.500425	0.691618	0.586871	0.305064	0.95024	0.292222	0.36785	0.315871	0.357053
b0146	sfsA predicted DNA-binding transcriptional regulator of maltose metabolism	1.44983	2.30313	1.86052	1.68337	7.03257	1.3937	0.891489	1.63317	2.99449	LQ	0.882602	LQ	2.31697	2.59404	1.97708	1.26202	2.12002	1.00683	0.857876	0.761172	0.761062	0.803942	3.51327	0.193012	4.1874	1.40707	1.56185	3.23451	1.84129	0.721989	0.767159	1.01709	0.682749	0.745763	0.752977	0.828497	2.30955	3.14953	3.22519	0.578191	2.37784	0.667563	0.550246	1.83632	0.177455	0.633279	1.72052	0.820143
b0147	ligT 2'-5' RNA ligase	0.808777	1.82345	1.66733	1.22811	0.920389	0.368146	1.34543	0.907601	1.74646	0.82551	0.222511	0.674872	1.05896	1.50585	1.67343	3.32987	1.68737	1.32062	1.14211	1.19461	0.443562	0.483893	1.90974	4.47793	1.98255	1.45637	1.59831	1.5461	1.3193	0.644253	0.61143	0.989074	1.48166	0.87482	0.160986	0.190566	0.79134	0.750096	1.8323	1.36229	0.220008	1.56891	0.418345	1.16862	0.223815	0.210915	0.549506	1.30841
b0149	mrcB murein synthesizing holoenzyme	0.452556	0.872669	0.951147	0.435357	0.216287	0.343198	0.506468	0.600763	0.308059	0.374637	0.17969	0.497518	0.304377	0.836145	0.233355	0.295006	0.192503	0.288046	0.254635	0.131468	0.338607	0.308393	0.276208	0.118545	0.411825	0.14283	0.702569	0.867181	0.294734	0.472179	0.395229	0.560818	0.459294	0.73043	1.16534	1.21896	0.485226	0.442012	0.544241	0.584595	0.123698	0.499788	0.151296	0.353084	0.662708	0.319612	0.217799	0.23893
b0150	fhuA FhuA outer membrane protein receptor for ferrichrome, colicin M, and phages T1, T5, and phi80	1.08227	1.15157	1.82441	0.984272	0.519347	0.77286	0.942415	0.624219	1.09212	1.52258	1.18759	1.2714	1.86935	1.81185	1.33601	0.559323	1.25546	0.918646	0.733145	1.63828	0.978103	0.843386	0.847642	0.947174	0.879919	0.517936	1.401	0.974111	1.00322	1.07423	0.934066	1.00412	0.775426	1.47296	0.238418	0.17802	0.783947	0.484596	0.654719	1.14597	0.750662	1.03804	1.23459	0.91649	0.52642	2.20939	0.310174	0.578731
b0151	fhuC ferrichrome uptake system	0.202176	1.29564	1.01272	0.869792	1.35598	2.16403	0.819541	1.46219	1.28199	1.06794	0.788245	1.26529	0.488457	1.48422	1.14749	0.346814	1.0977	1.07808	1.27895	0.776106	0.645535	0.664128	1.03	1.1021	0.373302	0.282954	0.877797	0.771968	1.51835	1.2462	1.46726	0.883726	0.382781	0.674358	0.109717	0.0858219	1.18956	1.69437	1.43781	1.39287	0.138868	0.987196	0.814532	0.869315	0.829759	0.376736	0.971298	0.502593
b0152	fhuD ferrichrome uptake system	0.510243	0.976329	0.518367	0.866926	0.599108	0.328771	1.38204	0.848916	1.12831	0.760896	0.467884	0.474585	0.658525	0.661282	0.982254	0.559662	1.1691	0.860353	0.780735	0.314732	1.06639	0.962488	0.627256	0.687316	0.253141	1.12436	0.901079	0.992847	0.620677	0.674392	0.723755	0.453553	0.818571	0.814936	0.188738	0.132681	0.590373	0.908112	0.529029	0.484736	0.496169	1.33496	0.517942	1.36345	0.679065	0.990934	0.580678	0.254742
b0153	fhuB ferrichrome uptake system	0.91155	0.932509	1.08423	0.522932	0.387809	0.326496	1.65662	1.14929	0.767224	0.383577	0.120498	0.21332	0.189054	1.12073	0.784113	2.26541	0.497413	0.777521	0.877655	0.400776	0.347316	0.356592	1.05413	0.311944	0.126645	0.261924	1.25959	0.719588	1.75862	1.00129	1.19631	0.303022	0.49039	1.09919	0.163544	0.127377	0.447203	0.794177	0.297648	0.625765	0.110585	0.861146	0.243035	1.04684	0.130133	0.936306	0.15462	0.274213
b0154	hemL glutamate-1-semialdehyde aminotransferase	0.198514	0.282914	0.326784	0.314084	0.125483	0.181473	0.25619	0.878481	0.442807	0.364014	0.343115	0.842593	0.192053	0.894685	0.233967	0.411895	0.361173	0.388971	0.443405	0.200396	0.146552	0.225106	0.350482	0.113522	0.106677	0.298531	0.350521	0.331908	0.313482	0.311365	0.404174	0.301906	0.306066	0.405433	0.089971	0.0807441	0.21965	0.338504	0.46957	0.237565	0.100107	0.363909	0.132136	0.594247	0.129177	0.170408	0.218007	0.685542
b0155	clcA EriC chloride ion ClC channel	1.15608	0.98921	0.565053	0.950628	0.343042	0.545887	0.877657	0.703751	0.776653	0.899976	0.670695	0.576568	0.98111	0.945661	1.13932	0.690473	1.03337	1.0249	0.96604	0.828347	0.290861	0.274307	0.720313	0.384583	0.848182	1.11557	1.20052	1.14274	0.740378	0.625683	0.694469	0.79549	0.77455	1.42176	0.176914	0.146591	0.729604	1.47359	0.805779	1.18479	1.09787	0.978186	0.297102	1.62548	0.375105	0.804466	0.481182	0.545473
b0156	erpA essential respiratory protein A	0.621368	0.795242	0.467682	0.654588	1.68758	0.277444	1.18877	0.521406	0.525547	0.459955	0.354926	0.445091	0.610163	0.947249	0.624839	0.303639	0.608422	0.347201	0.517129	0.716779	0.182602	0.296674	3.144	1.77161	0.326486	0.22067	0.660906	0.325916	0.981252	0.356145	0.524593	0.727307	0.616908	0.37358	0.270851	0.239459	0.360188	0.27189	0.533247	1.31639	1.29133	0.323791	0.131433	0.264641	0.263204	0.386239	0.188823	1.77506
b0157	yadS conserved inner membrane protein	1.14638	0.764383	0.773176	0.342176	2.58926	0.355349	0.308801	0.73485	0.461828	0.633674	0.882057	0.233859	0.491676	0.434025	0.436497	0.746737	0.60203	1.2639	1.29688	0.740293	0.2761	0.312714	0.600291	4.11422	1.03594	0.191104	1.26416	1.03769	0.766469	0.713018	0.699427	1.08731	0.947803	2.5017	0.81383	1.00457	0.835887	1.00384	0.291898	0.398099	0.279215	0.611907	0.184565	0.406197	2.53063	0.499089	0.650476	0.314492
b0158	btuF periplasmic vitamin B12 binding protein	2.54453	1.5088	1.15073	1.07014	1.85625	1.11345	0.353024	0.182066	1.3292	0.479698	0.233585	0.222171	0.837306	0.610213	1.00818	1.90998	0.862541	0.625453	0.602394	0.740488	0.568847	0.589381	1.36309	0.534486	0.164772	0.555396	0.879539	0.881377	2.10229	0.872137	0.934554	1.10367	0.292953	0.515997	0.109885	0.140201	1.05387	1.62418	1.31778	0.965522	0.533346	1.18091	0.219328	0.575818	0.579665	0.393466	1.64936	0.643252
b0159	mtn 5'-methylthioadenosine/S-adenosylhomocysteine nucleosidase monomer	0.59107	0.665807	0.362788	0.719052	0.355101	0.584353	0.700417	0.186654	1.07098	0.68176	0.381955	0.305757	1.08762	1.76883	0.42335	0.3851	0.519668	0.661356	0.633624	0.320702	0.187969	0.265546	0.40112	0.227046	1.74127	0.474288	0.486876	0.280856	0.592672	0.294515	0.43371	0.786213	0.454141	0.497637	0.121245	0.217941	0.368124	0.403312	0.829529	0.536278	0.178643	0.718561	0.198709	0.283488	0.240885	0.357036	0.250217	0.398299
b0160	dgt deoxyguanosinetriphosphate triphosphohydrolase	3.78449	3.95369	3.47053	4.20957	3.60602	4.34709	3.19787	1.66961	3.89594	2.78802	1.69047	2.8439	6.37827	1.99318	3.02609	2.35697	4.42363	3.45504	3.2162	4.04239	2.84754	3.4863	4.59423	4.32303	5.25165	4.21186	3.47147	3.62774	4.2756	4.42003	5.46614	4.64007	2.92074	3.40284	5.32204	6.88644	4.27703	3.56796	5.75897	3.99232	4.76555	3.72273	3.26113	3.48211	1.50892	7.23121	4.58446	6.57972
b0161	degP serine protease Do	2.43678	2.19285	1.95228	2.1019	1.09464	2.18158	1.71125	1.28515	1.76097	1.2834	0.332578	1.23922	0.778347	1.1329	1.95046	2.00429	1.16518	1.4271	1.41728	1.40336	2.29855	2.64016	1.02919	1.21582	1.01603	0.764899	1.72086	2.65498	2.03482	2.15584	2.84165	2.26766	1.93831	1.30211	1.93669	2.20554	2.54136	2.27081	3.95135	1.85733	1.69648	2.70554	1.76207	2.03813	2.04298	1.17494	0.643201	0.48825
b0162	cdaR CdaR transcriptional activator	1.9126	2.04858	2.04914	1.12131	1.48708	3.12436	0.782285	1.00637	1.93228	1.14583	0.287021	1.0589	0.69009	3.67727	1.70648	2.68375	1.32499	1.70307	1.78235	1.0593	1.02603	1.44776	0.770504	1.29564	2.299	0.971582	1.33174	3.31352	2.21425	1.48828	1.5386	1.48489	1.6186	1.04777	0.172865	0.281525	3.20072	1.48173	3.06546	1.28396	0.535929	1.84471	1.44998	2.15615	1.14705	0.858689	1.82938	0.714202
b0163	yaeH conserved protein	1.97882	1.07712	1.49854	0.772695	0.381839	0.512975	0.633055	LQ	0.807867	LQ	0.424195	LQ	1.44873	LQ	0.808705	0.76609	1.41347	0.825209	1.00007	0.914149	1.6985	1.70748	0.715801	2.4919	1.61226	0.448968	1.01751	1.99497	0.867291	1.3872	1.2101	1.76571	0.809869	0.763019	4.77312	3.87477	1.04371	0.411687	0.747234	1.94145	1.40908	1.20732	0.351516	0.72598	0.324005	0.620883	0.606279	1.26107
b0164	yaeI phosphodiesterase	1.28366	1.97741	1.23879	1.32333	0.295502	1.59022	2.63498	0.363937	1.64018	1.34014	0.346892	0.622778	0.925237	2.23082	2.17314	1.30446	1.33168	2.06534	2.12718	1.6023	0.236798	0.300675	2.05731	2.06613	2.85084	2.02052	1.13109	0.598001	1.5212	1.98013	1.98244	1.48544	2.75177	1.00534	0.417632	0.450598	1.6891	0.211306	1.71076	0.939673	0.447546	0.767428	0.815955	1.78895	0.22309	0.343426	2.25074	0.600005
b0165	b0165	0.920891	0.955519	0.939848	0.947435	0.635562	0.753109	0.713148	1.00478	0.959951	0.897072	0.707109	LQ	0.771706	1.66972	0.800025	1.81924	0.998012	0.85856	0.999652	0.695563	0.796779	0.951613	1.19926	0.689459	0.643486	0.975968	1.31114	1.053	1.10906	0.902491	0.945335	1.15874	1.32746	1.32511	0.519365	LQ	0.747141	0.796788	1.08478	0.864213	0.653068	1.56923	0.74177	1.06855	0.675232	0.714521	0.823504	0.74284
b0166	dapD tetrahydrodipicolinate succinylase subunit	0.368239	0.397614	0.20506	0.267038	0.142051	0.220633	0.28286	0.202259	0.751015	0.524635	0.173332	0.263228	0.338283	0.81699	0.58137	0.96204	0.505254	0.346576	0.358281	0.375769	0.171549	0.181755	0.315158	0.730922	0.209492	0.518915	0.420474	0.200971	0.32699	0.34636	0.425035	0.802397	0.368776	0.382903	0.140528	0.150389	0.298326	0.162665	0.499326	0.230293	0.16715	0.653019	0.381924	0.35857	0.384628	0.669495	0.287428	0.305664
b0167	glnD uridylyltransferase / uridylyl-removing enzyme	0.237169	0.217089	0.178898	0.245277	0.225339	0.173897	0.30991	0.235187	0.516905	0.481294	0.196928	0.276739	0.375824	0.447437	0.211887	0.392597	0.176395	0.261599	0.323496	0.43147	0.221596	0.226863	0.548711	0.152619	0.772695	0.309043	0.321682	0.422674	0.352651	0.246246	0.275786	0.431152	0.403388	0.592506	0.194574	0.175027	0.149492	0.172491	0.196939	0.165558	0.189158	0.646249	0.128656	0.300313	0.961907	0.175234	0.260936	1.10215
b0168	map methionine aminopeptidase	0.244246	0.406019	0.233936	0.223296	0.141467	0.153549	0.220971	0.294709	0.359779	0.494436	0.240891	0.541159	0.495229	0.386745	0.230007	0.329816	0.338799	0.463355	0.479904	0.245021	0.156767	0.176308	0.280281	0.123364	0.282409	0.167471	0.272433	1.30603	0.294135	0.561549	0.597694	0.283522	0.287018	0.332517	0.134849	0.198776	0.184304	0.177793	0.462104	0.396352	0.161125	0.479617	0.153211	0.290682	0.157379	0.283797	0.228229	0.222525
b0169	rpsB 30S ribosomal subunit protein S2	0.191733	0.32574	0.214002	0.268211	0.154718	0.158774	0.175661	0.288177	0.169039	0.32957	0.162963	0.228133	0.279938	0.425117	0.244412	0.365198	0.429737	0.377947	0.415688	0.19461	0.177945	0.195738	0.311714	0.147677	0.174403	0.172062	0.262712	0.475531	0.356751	0.316841	0.307627	0.210193	0.33322	0.381938	0.139191	0.168565	0.22996	0.2083	0.103052	0.252925	0.168049	0.450267	0.145477	0.284718	0.151238	0.204779	0.227893	0.177503
b0170	tsf protein chain elongation factor EF-Ts	0.22055	0.210006	0.198277	0.214897	0.176395	0.164379	0.181212	0.285756	0.375132	0.392922	0.214322	0.213233	0.327045	0.569347	0.224155	0.365716	0.218824	0.285654	0.258595	0.407189	0.181871	0.172078	0.451394	0.146566	0.151539	0.165208	0.338862	0.172309	0.339226	0.201066	0.183771	0.290165	0.342725	0.32135	0.124975	0.12031	0.169611	0.208992	0.111065	0.226267	0.146087	0.589996	0.136764	0.49346	0.229561	0.166532	0.225431	0.207765
b0171	pyrH uridylate kinase	0.483717	0.184043	0.165647	0.206508	0.114051	0.156378	0.348033	0.78641	0.696929	0.783703	0.480942	0.492167	0.743699	1.69186	0.16068	0.278012	0.180297	0.3206	0.206981	0.306009	0.147522	0.143419	0.238558	0.154645	0.149576	0.0957282	0.278238	0.108627	0.308406	0.2712	0.266324	0.121231	0.266299	0.298901	0.104491	0.0898516	0.168803	0.174769	0.0947426	0.259476	0.094978	0.367828	0.0877928	0.280922	0.35293	0.14175	0.19331	0.999096
b0172	frr ribosome recycling factor	0.429835	0.376649	0.319558	0.314745	0.182266	0.213011	2.12138	10.0362	13.427	2.53789	6.0887	4.93999	4.79239	8.6625	0.244265	0.453262	0.270388	0.293851	0.324486	0.154515	0.224162	0.270735	0.384317	1.4016	0.173438	0.211635	0.349429	0.26335	0.411675	0.79462	0.696417	0.156091	0.453268	0.442303	0.192764	0.20138	0.23744	0.255462	0.124489	0.239659	0.19228	0.577974	0.179151	0.380073	0.216755	0.226731	0.293248	0.252276
b0173	dxr 1-deoxy-D-xylulose 5-phosphate reductoisomerase	0.253654	0.242005	0.311599	0.216675	0.141148	0.216112	0.136182	1.4477	1.17166	0.681358	0.232449	0.861959	0.200846	2.18082	0.184099	0.423882	0.178602	0.256061	0.234574	0.110552	0.255693	0.208488	0.412007	0.208338	0.079885	0.217312	0.298427	0.40637	0.33728	0.45263	0.440566	0.134303	0.442266	0.390875	0.140996	0.170958	0.141678	0.179914	0.0753045	0.178875	0.200225	0.443476	0.186309	0.343069	0.212309	0.0966119	0.335482	0.436741
b0174	ispU subunit of undecaprenyl diphosphate synthase	0.241759	0.215625	0.225969	0.230794	0.177764	0.225195	0.105058	0.269694	0.224377	0.315702	0.235949	0.349361	0.244206	0.486941	0.205095	0.297239	0.14933	0.346598	0.366863	0.203144	0.192301	0.22986	0.546987	0.177396	0.113872	0.24841	0.280705	0.167232	0.276076	0.159223	0.204155	0.226905	0.308294	0.31613	0.129774	0.155854	0.151509	0.190063	0.135654	0.501169	0.165196	0.368767	0.173774	0.214652	0.198937	0.116764	0.266824	0.210002
b0175	cdsA CDP-diglyceride synthetase	0.147448	0.160498	0.149006	0.164562	0.0985792	0.126775	0.132742	0.266333	0.184132	0.250695	0.128859	0.247655	0.163115	0.763359	0.554078	0.236032	0.149221	0.255765	0.256134	0.202094	0.625612	0.557804	0.21003	0.107883	0.105526	0.117055	0.328545	0.122119	0.210228	0.129577	0.13787	0.554934	0.228008	0.282134	0.0954805	0.0812493	0.171002	0.130248	0.122703	0.289061	0.102732	0.277292	0.126488	0.199168	0.134089	0.182263	0.154735	0.213026
b0176	rseP RseP zinc protease	0.175302	0.176957	0.15844	0.16342	0.122753	0.14577	0.107397	0.183777	0.175307	0.486882	0.115058	0.311867	0.0912245	0.345561	0.173644	0.254458	0.142785	0.359084	0.332634	0.409425	0.195383	0.313179	0.228319	0.139167	0.0797985	0.140162	0.257414	0.133739	0.234153	0.125898	0.143851	0.238827	0.323061	0.343763	0.0911933	0.115362	0.131812	0.139593	0.121177	0.33108	0.123052	0.31791	0.146421	0.157243	0.199864	0.231427	0.170082	0.697645
b0177	yaeT Outer Membrane Protein Assembly Complex	0.251742	0.226042	0.205129	0.202443	0.148476	0.151251	0.0723635	0.604787	0.135602	0.306403	0.0789627	0.204495	0.17928	0.286382	0.217904	0.320747	0.430758	0.257161	0.290596	0.107541	0.284751	0.297741	0.244551	0.169538	0.0620855	0.20074	0.232649	0.200739	0.252619	0.200352	0.220554	0.158994	0.27623	0.268686	0.130499	0.154298	0.0877023	0.169038	0.0499384	0.208357	0.194612	0.352524	0.172562	0.231422	0.170395	0.126127	0.318552	0.116728
b0178	hlpA periplasmic chaperone	0.529583	0.67874	0.516161	0.365483	0.166387	0.172056	1.23174	0.356236	1.2307	0.262955	1.38184	0.167199	1.17916	0.657461	1.37687	2.80305	1.36428	0.780285	0.482087	1.327	0.192513	0.40756	0.192715	0.216207	1.17041	0.505072	0.365082	0.190566	0.869153	0.568805	0.495468	1.34957	0.612064	0.293089	0.179197	0.2143	1.39876	0.137729	1.19283	0.430423	1.52283	0.72388	0.0744176	0.175935	0.137807	1.27819	1.35061	1.27658
b0179	lpxD UDP-3-O-[3-hydroxymyristoyl]glucosamine N-acetyltransferase	0.157755	0.197836	0.169041	0.23797	0.108084	0.51937	0.175786	0.149058	0.209568	0.344971	0.188549	0.148828	0.260027	0.298769	0.292281	0.414808	0.211535	0.248112	0.259922	0.160256	0.159437	0.159347	0.227083	0.0869661	0.126692	0.11151	0.265514	0.116318	0.263291	0.259021	0.24268	0.0926427	0.218993	0.243158	0.105176	0.0760701	0.0888493	0.143686	0.0738571	0.106135	0.107507	0.265521	0.111004	0.259212	0.126422	0.154685	0.151639	0.136043
b0180	fabZ beta;-hydroxyacyl-ACP dehydratase	0.33323	0.446424	0.322173	0.424074	0.248084	0.322211	0.27312	0.521954	0.32159	0.413897	0.419632	0.251856	0.741871	0.477268	0.774733	0.60833	0.540046	0.361995	0.364955	0.285146	0.293632	0.347903	0.59865	0.253856	0.225588	0.285601	0.442255	0.360774	0.512348	0.309661	0.403274	0.226771	0.605105	0.550601	0.184734	0.255242	0.234623	0.352541	0.187458	0.298093	0.255155	0.646834	0.314726	0.458436	0.253227	0.309532	0.323331	0.293258
b0181	lpxA UDP-N-acetylglucosamine acyltransferase	0.167671	0.22236	0.200472	0.224526	0.131748	0.176042	0.163859	0.213173	0.138852	0.25931	0.211067	LQ	0.188858	0.258653	0.284684	0.349499	0.226575	0.277345	0.267694	0.20031	0.267325	0.251559	0.310143	0.123391	0.174204	0.13448	0.350653	0.130438	0.325981	0.224701	0.15473	0.110697	0.300105	0.362437	0.184554	0.12355	0.246203	0.187948	0.0986778	0.140871	0.10897	0.379534	0.125632	0.361871	0.167252	0.172273	0.208808	0.224695
b0182	lpxB lipid A disaccharide synthase	0.180323	0.202766	0.243566	0.206327	0.143847	0.231025	0.155512	0.185276	0.129058	0.306837	0.169392	0.174583	0.151715	0.242775	0.242776	0.312738	0.200434	0.301926	0.241139	0.168882	0.222075	0.154514	0.273947	0.105812	0.135313	0.127628	0.374009	0.108591	0.318217	0.195958	0.151046	0.0945653	0.281006	0.358699	0.173044	0.0909869	0.116534	0.170395	0.143323	0.125842	0.11179	0.381906	0.10774	0.380684	0.129771	0.140629	0.207233	0.172247
b0183	rnhB RNAse HII, degrades RNA of DNA-RNA hybrids	0.240379	0.274513	0.262856	0.26864	0.201811	0.320304	0.251498	0.307315	0.186661	0.514523	0.205412	0.428134	0.221629	0.459697	0.510883	0.407764	0.36969	0.644174	0.561288	0.194029	0.585492	0.507334	0.350752	0.183439	0.154469	0.204996	0.563519	0.152099	0.483361	0.380397	0.386648	0.256011	0.389273	0.436928	0.164605	0.162051	0.161452	0.212334	0.312247	0.227302	0.43416	0.976534	0.131246	0.395247	0.22682	0.191231	0.180614	0.217369
b0185	accA acetyl CoA carboxylase	0.226913	0.225448	0.194391	0.188803	0.151062	0.14547	0.193631	0.172632	0.256143	0.47878	0.229752	0.188064	0.261173	0.845256	0.229116	0.243127	0.234492	0.412409	0.419443	0.209362	0.269107	0.317223	0.206992	0.0908279	0.148971	0.363636	0.367472	0.124076	0.255098	0.219095	0.238968	0.330348	0.26158	0.239458	0.148834	0.138706	0.219651	0.231169	0.13323	0.285741	0.120444	0.319984	0.102963	0.35807	0.104949	0.255846	0.134895	0.325358
b0186	ldcC lysine decarboxylase 2	0.353134	0.985972	1.17438	0.689727	1.02042	0.940889	0.682775	1.14568	0.82652	1.15636	0.695308	1.01973	1.18005	1.83383	0.721683	0.425797	0.64097	0.879492	0.829688	0.819171	0.287271	0.338596	1.48717	0.589339	0.571858	0.482082	1.27571	1.56965	0.946807	0.855356	0.856036	0.754871	1.70828	0.755927	0.902285	1.00872	0.79847	0.965374	0.610985	0.83147	0.571492	0.850583	0.28772	0.953696	0.209582	1.1218	0.70851	1.12459
b0187	yaeR predicted lyase	0.48885	0.700994	0.408412	0.754177	0.437847	0.397763	0.763314	0.523953	0.65765	1.1413	0.330865	0.63291	0.993183	1.87029	1.16183	0.596752	0.911755	1.27941	1.24321	0.465428	1.00349	0.785441	0.580057	0.431761	0.27989	0.412782	0.801288	0.568563	0.673593	0.613623	0.752937	0.52485	1.11395	0.763265	0.720847	0.824209	0.597465	0.711913	0.321479	0.88031	0.379827	1.56268	0.333389	0.706119	0.371353	1.4656	1.14836	1.39006
b0188	tilS tRNA Ile-lysidine synthetase	0.352241	0.312758	0.249152	0.327737	0.200735	0.195613	0.254517	0.258781	0.155918	0.528832	0.16191	0.354043	0.179917	0.692228	0.405961	0.674664	0.328738	0.600124	0.538838	0.260138	0.468813	0.369139	0.45029	0.168144	0.120481	0.199134	0.409514	0.199586	0.392137	0.2673	0.337288	0.168675	0.464275	0.416473	0.204784	0.210938	0.179525	0.318647	0.0955343	0.256101	0.164797	0.503502	0.155263	0.372922	0.237357	0.182684	0.378676	0.165255
b0189	rof Rho-binding antiterminator	1.2084	0.735221	0.543711	1.38441	0.399642	0.559243	0.336707	1.00419	0.506681	0.851417	0.352492	0.742205	0.477764	1.26883	0.775567	0.995866	0.629039	1.24312	1.05509	0.504666	1.13497	1.01351	2.25218	0.441994	0.285448	0.559907	0.716372	1.15649	0.778069	0.60962	0.715151	1.02773	1.57914	0.848743	0.343577	0.44794	0.420696	0.523743	0.505913	0.987444	0.404662	0.985677	0.478792	1.98102	0.49212	0.332929	0.702547	0.51157
b0190	yaeQ conserved protein	0.420428	1.54475	0.980655	0.853534	0.191066	1.4054	0.480781	1.27588	1.00915	0.860487	0.649839	1.27769	0.58445	1.71452	1.33689	2.90285	0.810177	0.894053	0.959901	0.735146	0.493985	0.557349	1.04257	0.233397	0.695411	1.25134	1.01514	0.314902	0.87499	1.10108	0.991958	0.542274	0.430442	0.810424	0.127226	0.185887	1.55885	1.10083	1.9386	1.04667	0.176636	0.496106	1.78277	1.34776	0.229239	0.376131	1.18018	0.415857
b0191	yaeJ conserved protein	1.919	1.6172	0.800513	0.828104	0.200639	1.60696	0.654188	1.21453	1.03836	0.634634	0.567791	0.580529	0.44389	0.404989	1.09608	0.491113	1.27391	1.43418	1.25818	1.05495	0.546803	0.603849	0.234919	0.146459	0.373367	0.505178	1.36504	0.716628	1.44328	1.41212	1.2596	0.676302	0.738075	0.377149	0.0859137	0.137824	1.28348	1.58957	1.64736	0.875323	0.124311	1.86179	0.360716	1.75901	0.0684664	0.426212	0.936883	0.74375
b0192	nlpE outer membrane lipoprotein NlpE, involved in surface sensing	0.638577	1.32272	1.17541	1.57908	0.401098	0.352237	0.676988	2.49118	0.901457	0.737641	2.09231	0.479903	1.17937	2.6659	0.727087	1.01932	0.740386	1.03016	1.03872	0.517485	1.08472	1.02344	0.89791	0.450948	0.341278	0.443195	1.00169	0.810406	0.8432	0.563372	0.639078	0.964304	0.505729	2.2881	0.156187	0.168894	0.582689	0.990795	0.434828	0.548856	0.279025	0.534794	0.234571	1.22147	0.205892	0.43263	0.367791	0.364823
b0193	yaeF predicted lipoprotein	1.7573	0.966299	1.44329	0.460264	0.663317	1.2307	0.672912	0.365809	1.17889	1.03574	3.49568	1.22268	3.2222	2.18806	1.15658	0.161067	1.04396	1.28441	1.00425	0.626189	2.16649	1.7666	0.937743	5.58533	0.347365	1.23783	2.21307	0.364086	1.73968	0.974237	0.813279	0.698792	0.305059	2.7489	0.0815044	0.0858457	0.674488	0.438248	0.431927	0.956177	2.36583	0.85524	0.795547	0.934091	0.0576726	1.88993	1.25207	2.87306
b0194	proS prolyl-tRNA synthetase	0.386436	0.29478	0.346456	0.291274	0.366704	0.256656	0.151831	0.343125	0.174106	0.368834	0.253774	0.308528	0.239129	0.613618	0.175341	0.417367	0.346663	0.356213	0.348122	0.125957	0.300455	0.348228	0.40005	0.296002	0.0941664	0.20816	0.425761	0.306023	0.633301	0.339491	0.372219	0.178521	0.431249	0.467414	0.124639	0.137102	0.299263	0.243196	0.0777565	0.237108	0.214332	0.522787	0.191258	0.413601	0.192303	0.1521	0.231025	0.339949
b0195	yaeB conserved protein	1.26245	1.1677	1.03364	1.14842	0.6681	0.99766	0.642836	0.838301	1.00255	0.735002	0.227546	0.688404	1.13274	0.824919	0.914008	0.802294	0.471245	0.812173	0.636888	1.74853	1.57241	1.47875	0.831438	0.888639	0.207677	0.606505	1.12756	0.619048	1.69343	0.850011	0.827834	0.772971	1.21141	1.80504	0.254702	0.26556	1.37829	1.0363	1.14187	0.726668	0.721628	0.435599	0.253591	0.843877	0.358126	0.664769	0.347475	0.979211
b0196	rcsF RcsF-P	1.01886	1.83977	1.03072	1.60314	1.76411	2.01859	2.06074	2.11523	1.33418	1.39925	0.478331	1.06077	1.21014	1.05101	0.597107	0.561837	0.464736	0.683239	0.579662	0.678598	1.0564	0.985721	0.397682	0.180633	0.796502	1.64975	1.72246	1.0856	1.41121	1.45019	1.28028	1.04293	0.844142	0.843466	0.235763	0.151856	1.85459	2.34991	2.25756	1.19013	0.224328	0.65242	1.84994	0.745264	1.01848	0.599747	0.77511	0.41224
b0197	metQ L- and D-methionine uptake ABC permease	0.762028	0.988218	0.527658	0.850785	0.548322	0.864899	0.775778	0.871406	0.554483	0.905598	0.220508	0.682038	1.83791	1.20201	1.04552	1.10254	0.560089	0.815917	0.97353	2.76616	2.96533	2.44142	0.935649	2.2916	3.25854	0.658688	0.737643	1.03303	0.507602	1.90068	1.85862	1.70906	0.821407	0.763299	0.439858	0.530267	1.02235	1.3464	1.61081	0.536021	0.728174	0.546807	0.226418	0.503825	0.301918	0.196793	0.293546	1.00819
b0198	metI L- and D-methionine uptake ABC permease	0.886772	0.932752	0.64328	0.656893	0.192872	1.73234	0.946025	2.15288	0.63836	2.07448	0.702636	1.67798	1.65275	2.70373	1.05961	1.76051	0.578132	0.822458	0.964087	2.81901	0.945673	0.770835	4.96104	1.94787	4.80256	0.418663	1.22299	2.33917	0.608046	1.03447	1.34167	2.0059	1.33944	2.27837	3.89462	4.05216	0.769308	1.13739	1.04314	1.36321	3.34664	0.554366	0.325628	0.58086	0.153226	0.527232	0.757962	1.93474
b0199	metN L- and D-methionine uptake ABC permease	0.537728	0.493921	0.390067	0.470384	1.00566	0.385983	0.304206	0.466444	0.87266	0.950707	0.453209	0.331119	0.707062	2.0762	0.865922	0.541418	0.458999	1.13896	1.15676	1.0032	1.81906	1.99567	0.963128	0.562894	0.503527	0.874336	0.706629	0.473378	0.783564	0.790494	0.727003	0.520229	0.707535	0.859363	1.36614	1.73588	0.587751	0.751584	1.1877	0.776378	0.461727	1.13731	0.277339	0.373935	0.232404	0.193936	1.09598	0.708223
b0200	gmhB D,D-heptose 1,7-bisphosphate phosphatase	0.39778	0.476653	0.3867	0.431382	0.577509	0.365922	0.247813	0.446342	0.784337	0.506696	0.269565	0.383364	0.572347	0.842087	0.503402	0.5063	0.319799	0.521965	0.513519	0.305263	0.445128	0.509517	0.479451	0.291162	0.319322	0.770276	0.539028	0.495126	0.468256	0.349778	0.369895	0.423469	0.744556	1.40639	0.244736	0.299015	0.584257	0.480293	0.986714	0.569993	0.274903	0.726323	0.273641	0.459202	0.262342	0.365176	0.654544	0.304599
b0207	dkgB 4-nitrobenzaldehyde reductase [multifunctional]	1.45581	0.551004	0.379954	0.681007	0.604129	0.412455	0.502536	1.23808	1.23128	1.01169	0.217432	0.307949	0.79468	1.39487	0.352824	1.61562	0.441636	0.74935	0.637271	0.44445	2.14882	1.68554	0.269895	0.244019	0.194564	0.17062	0.564607	0.216117	0.802557	0.867074	0.763228	0.507729	0.303279	0.616878	0.312815	0.338998	1.80387	0.448535	1.73286	1.4486	0.260586	0.505739	0.942335	0.927002	0.18257	1.24726	0.294347	0.313501
b0208	yafC predicted DNA-binding transcriptional regulator LYSR-type	0.833135	0.75964	0.467295	0.25403	0.378168	0.877423	0.154658	LQ	0.610205	0.95458	0.134516	LQ	0.980901	0.375644	0.713698	2.24755	0.43714	0.842482	0.85568	0.812647	0.435918	0.454135	0.459513	1.51696	0.26831	0.117002	0.603923	0.593843	0.39351	1.0661	1.05265	0.646987	0.488926	1.03335	1.06467	1.36338	0.667062	0.782402	0.517472	0.467169	1.55711	0.487753	0.73065	0.767427	0.661465	0.623335	0.685859	0.259242
b0209	yafD conserved protein	0.87838	1.11013	1.03311	0.877284	2.46924	0.593365	0.397058	0.444166	0.712581	0.65005	0.139742	0.44028	0.555232	0.233495	0.832799	2.18655	1.39375	3.1889	2.64295	1.36998	0.596086	0.627016	0.253597	0.224383	0.941032	0.169833	1.44588	1.39665	5.75361	4.84423	4.74475	1.012	0.410572	0.716501	0.193695	0.295036	0.412622	0.240538	1.51094	1.1145	0.175978	0.380733	3.24254	1.90755	0.131151	2.83321	0.39373	0.353018
b0212	gloB glyoxalase II	1.02055	0.904299	0.44994	1.30651	0.24176	1.04468	0.248268	1.34036	0.986885	0.889488	0.499604	0.867919	0.728494	0.417046	0.448771	0.476549	0.269922	1.4847	1.20644	0.986823	0.621261	0.658473	0.469649	0.262678	0.246043	0.328109	0.571656	1.12957	0.546236	0.831188	0.770069	1.85822	0.896652	0.92088	0.225938	0.328077	0.454175	0.935752	0.186902	1.05559	0.39567	0.645167	0.380182	0.594166	0.246531	0.98254	2.22007	0.376534
b0214	rnhA RNase HI, degrades RNA of DNA-RNA hybrids, participates in DNA replication	0.379731	0.454277	0.346896	0.40502	0.27122	0.447962	0.333597	0.413122	0.330943	0.571477	0.360102	0.400245	0.355355	0.509977	0.567384	0.578142	0.505338	0.379876	0.412959	0.321454	0.30441	0.370781	0.47721	0.277506	0.58681	0.375459	0.443603	0.368317	0.470102	0.453925	0.524964	0.755607	0.552713	0.609368	0.455931	0.461851	0.648036	0.465229	0.211582	0.520356	0.264045	0.678683	0.320756	0.464397	0.29405	0.449352	0.358783	0.332927
b0215	dnaQ DNA polymerase III, epsilon; subunit	0.279676	0.30389	0.63224	0.368429	0.214749	0.36509	0.19588	0.354656	0.242212	0.523979	0.17873	0.402418	0.369822	0.388873	0.376942	0.331719	0.307285	0.257272	0.352405	0.24929	0.273438	0.393353	0.257698	0.175413	0.203467	0.265403	0.322885	0.631988	0.292877	0.496975	0.545516	0.57125	0.302339	0.305159	0.20234	0.254031	0.277234	0.918101	0.263734	0.380603	0.178275	0.380259	0.235844	0.282354	0.162031	0.201165	0.31197	0.255774
b0217	yafT predicted aminopeptidase	1.64394	1.38019	1.69591	1.27785	2.88036	2.58998	1.51402	1.22491	1.04625	0.685265	0.344979	1.91579	1.36841	0.553396	1.45364	0.592049	2.20739	1.27887	1.25556	1.32808	1.3241	1.24764	0.86394	0.275172	2.95521	1.57772	1.70033	1.2049	1.17508	1.63369	1.60256	1.9716	1.52898	0.61381	1.00734	1.15292	1.45662	1.75252	2.12701	1.85219	2.64129	2.08451	1.94115	1.64452	2.75813	1.13342	2.74935	0.983333
b0218	yafU predicted inner membrane protein	2.53034	2.09374	1.96539	1.64823	2.42047	1.93012	1.10056	1.5378	1.70599	1.55578	0.530377	3.93405	1.47989	1.01986	2.94817	1.15806	3.96136	2.70302	2.26022	2.99528	4.83376	3.51398	1.11005	0.635172	2.6296	2.57003	2.92661	3.84606	3.02292	1.97383	1.65039	4.63781	7.9453	1.32253	5.04478	3.13186	2.2764	1.92649	4.53397	3.1107	2.08819	2.24693	3.16423	3.54246	0.775898	7.1402	2.47136	2.67904
b0219	yafV predicted C-N hydrolase family amidase, NAD(P)-binding	0.785183	1.33669	0.898984	1.61075	0.539585	1.03048	1.36376	0.689248	0.803578	0.927125	1.01274	1.16153	0.688445	0.688464	1.04827	0.518525	1.44999	1.26523	1.44445	1.77818	0.950746	1.37904	0.685283	1.71798	0.321981	0.629104	1.3498	0.894864	1.04778	0.643005	0.889077	0.834724	0.968432	0.902716	0.493526	0.860744	0.965061	2.25838	1.17276	0.744198	0.550875	1.23086	0.407349	0.619878	0.324811	0.89105	0.408723	0.763957
b0220	ivy inhibitor of vertebrate C-type lysozyme	1.12315	1.16304	1.40032	0.997019	1.9119	2.07625	0.966169	0.836645	1.45557	1.07965	0.587211	1.32916	1.26219	1.17405	1.49994	0.477788	0.796159	1.07571	1.09498	1.17528	1.29588	1.42384	2.06396	0.56131	0.35345	2.2334	0.8003	1.82599	1.85293	1.60638	1.43327	0.850317	0.580655	1.0275	1.38406	1.43792	1.7186	1.50481	1.36174	1.16129	0.465228	1.60959	3.78844	0.841815	0.370322	0.426933	0.416545	1.00016
b0221	fadE acyl-CoA dehydrogenase	0.430176	0.490437	0.561192	0.419246	0.201948	0.306207	0.560823	0.76423	0.452359	0.637408	0.546945	0.570828	0.870623	0.616047	0.595117	0.424139	0.538532	0.604034	0.648999	0.449405	0.507988	0.542629	0.880811	0.174536	0.322001	0.235121	0.882859	0.256915	0.592353	0.441722	0.473015	0.519215	0.689499	0.73294	0.217424	0.199275	0.441123	0.36998	0.385135	0.353964	0.599075	0.861957	0.200795	0.794811	0.381303	0.440064	0.474876	0.907963
b0222	lpcA D-sedoheptulose 7-phosphate isomerase	0.249808	0.403441	0.420048	0.349715	0.177977	0.49238	0.339106	0.558901	0.278261	0.46298	0.419794	1.19225	0.325257	0.513745	0.359196	0.390768	0.45086	0.486406	0.42739	0.401289	0.289437	0.35016	0.438812	0.224426	0.35255	0.192575	0.513657	0.250031	0.4738	0.246734	0.23762	0.419016	0.427134	0.422929	1.39042	1.34549	0.205728	0.435855	0.171278	0.342412	0.195795	0.466568	0.174684	0.394601	0.240331	0.291279	0.311502	2.08999
b0224	yafK conserved protein	2.12071	1.33763	1.73165	1.34343	0.214241	2.13491	0.663248	1.22322	1.13399	0.91207	0.336137	0.566854	1.23912	1.12941	0.612005	0.359076	1.02273	0.652891	0.681491	0.343967	0.235215	0.314419	0.41497	1.26323	0.528704	0.625128	1.758	1.77781	1.0775	0.464842	0.460649	1.04586	1.02854	2.45114	0.256897	0.355579	1.18017	0.901872	0.898858	1.56689	0.412637	0.50263	0.719539	0.479073	1.27806	3.14778	0.790605	1.23673
b0225	yafQ toxin of the YafQ-DinJ toxin-antitoxin system	1.08995	1.21989	0.823458	1.09723	0.705281	1.20664	0.499519	1.01322	0.788901	LQ	0.568203	LQ	1.44572	1.00223	0.938777	1.28703	0.93325	0.8588	0.83136	0.727679	0.738765	0.869665	1.34824	0.657185	0.657816	0.813745	1.04895	0.854858	1.09642	0.881631	0.917582	0.739191	1.14416	1.19312	1.21635	1.20113	0.666411	0.981002	1.06053	0.922318	1.17717	1.81855	0.799102	1.05528	0.602989	1.00273	0.939729	1.09071
b0226	dinJ antitoxin of YafQ-DinJ toxin-antitoxin system	0.824872	0.776021	0.584697	0.994029	1.05957	1.33516	0.591074	0.681622	0.789862	0.589492	0.479671	0.540491	1.76987	0.608577	0.676385	0.735406	0.548734	0.50602	0.59103	0.494292	0.42786	0.447034	0.897676	0.575637	0.929339	0.644473	0.675098	0.655677	0.697565	0.614293	0.631566	0.803341	0.830516	0.813207	1.24191	0.827874	0.698362	1.09937	0.963919	0.61623	0.596092	0.975535	0.406886	0.745348	0.366838	2.23598	0.509737	0.590886
b0227	yafL predicted lipoprotein and C40 family peptidase	0.624123	0.720465	1.00036	1.20952	1.08167	0.941207	0.346184	0.41061	0.382107	0.747048	0.287679	1.04099	1.19733	0.55526	1.07483	1.41044	1.1472	0.528799	0.608763	0.507598	0.265991	0.319138	1.16728	0.530713	1.44747	0.275634	0.798796	0.535748	0.662173	0.397657	0.440305	0.684262	1.13503	1.77153	1.85783	2.42359	0.409484	0.915082	0.319519	0.478531	1.75312	1.9158	0.598257	0.532412	0.253625	0.601506	0.519269	2.45738
b0228	yafM conserved protein	1.38525	1.13406	2.26043	1.43268	0.902913	1.25042	0.308487	0.544957	0.950788	0.919609	0.448019	1.28936	1.8139	0.793782	1.85959	0.898107	0.683205	1.09558	1.06533	1.15015	0.400632	0.565454	0.587641	0.667336	1.57931	2.25796	1.01367	2.02462	1.28118	1.17876	1.14179	0.93371	0.545546	0.985373	0.292985	0.358269	1.13692	1.35842	0.309549	0.73593	1.11269	1.00252	0.942321	1.10027	0.391384	0.782439	1.40148	1.62358
b0229	fhiA	0.375353	0.576782	0.467269	0.385965	0.494483	0.21298	0.377489	0.313696	0.52473	0.983223	0.117703	0.361624	0.300399	0.917502	0.591976	0.901323	0.427105	0.50948	0.486235	0.491914	0.638628	0.744372	1.0723	0.202356	0.53902	0.219628	0.713289	0.394537	0.716934	0.280882	0.288305	0.342879	0.489828	0.804623	0.181367	0.146512	0.254078	0.546896	0.153628	0.567553	0.19804	0.702066	0.234624	0.550103	0.365538	1.0009	0.389719	0.947949
b0230	mbhA	0.449736	0.960609	0.80086	0.859878	0.491279	0.474851	0.477248	0.608274	0.930457	0.929097	0.218543	0.495296	1.29683	0.7216	0.73338	0.6496	0.586229	0.963113	0.931929	0.679081	0.504224	0.407258	0.943496	0.624999	0.400823	0.32111	1.00915	0.328152	0.855307	0.586099	0.533861	0.335105	0.926656	0.739721	0.355896	LQ	0.498053	0.97862	0.572495	1.08078	0.878653	0.896079	0.325292	0.898424	0.347154	0.772721	0.463381	0.248589
b0231	dinB DNA polymerase IV (Y-family DNA polymerase; translesion DNA synthesis)	0.846068	0.600477	1.18391	1.4072	1.42125	0.288441	0.354291	0.612903	0.67103	0.9627	1.19986	0.996689	0.41547	0.877234	1.21955	0.450106	1.16549	0.991584	1.00774	0.851583	0.873188	0.996684	0.41612	0.192833	1.34417	0.330827	1.18943	0.713441	1.75378	1.19536	1.32754	1.12609	0.511691	0.709641	2.40173	2.28698	0.598549	0.652116	0.27935	1.28212	0.927649	1.07738	2.01843	0.678529	0.193799	1.3998	0.369328	0.411052
b0232	yafN conserved hypothetical protein with a possible role in spontaneous mutagenesis	2.69668	1.26689	2.59627	2.03754	1.75803	1.91782	1.45572	0.945674	1.23713	1.18629	1.02621	1.56531	2.33877	0.912544	3.63839	1.66062	2.36766	1.55566	1.54974	1.75689	1.92826	1.9155	3.10467	0.686986	2.39129	2.76622	1.83791	1.64367	1.88502	2.55867	2.44156	1.35542	1.68402	3.5348	0.689555	0.836905	1.83383	1.61519	2.17296	1.82037	0.882525	1.84648	1.52399	2.11574	0.661145	1.06245	1.46575	0.834881
b0233	yafO conserved protein with a possible role in spontaneous mutagenesis; toxin of a putative toxin-antitoxin pair	4.33428	3.48067	5.81391	3.8465	6.77806	6.81271	5.25343	3.32389	4.46009	2.73646	5.33498	5.50412	3.30995	0.78104	9.50566	8.51151	6.71992	4.51784	4.58637	6.8286	9.52563	7.74838	5.62747	1.69615	4.69486	6.55384	4.22618	4.46486	6.7057	6.77386	5.22515	5.92507	6.02715	3.63652	10.8416	6.79653	9.24731	4.84048	6.61735	4.20521	2.89386	5.43648	7.28298	7.77906	9.12958	5.65427	9.16389	2.75353
b0234	yafP predicted acyltransferase with acyl-CoA N-acyltransferase domain	1.06921	1.19844	1.09718	1.34997	0.811378	1.02297	3.82573	0.976171	2.82039	0.958501	1.43359	0.929344	2.12979	1.04515	4.36801	1.54666	4.75076	1.25259	1.25679	3.17754	1.08407	1.10539	1.3711	1.23597	2.19872	1.19418	1.52198	1.1274	1.43394	1.20286	1.19846	2.89331	1.38109	1.74873	0.650419	0.762533	3.55119	1.06948	3.74684	1.11627	1.09597	1.91014	0.902781	1.47467	0.972677	2.29767	1.17859	1.93397
b0235	ykfJ	5.06387	5.3767	5.95786	4.07269	6.85673	6.23295	2.90005	4.01226	1.58675	2.38923	4.65339	3.35532	1.04778	0.431806	2.76092	8.09901	2.74079	4.69067	4.89746	2.64993	1.29542	1.29635	4.21593	5.72381	2.72613	4.27383	3.93367	3.82426	4.60446	5.61153	6.97341	2.23409	7.35456	10.5956	4.3919	4.70892	1.28756	3.12564	2.05756	6.80364	9.73391	10.1664	3.79693	4.29098	0.751137	2.64728	4.82723	2.11457
b0236	prfH	0.658849	1.21917	0.742369	1.35517	0.597666	0.758471	1.16923	LQ	1.04304	LQ	0.938192	LQ	0.922707	0.690035	1.20949	LQ	0.977555	0.636461	LQ	1.12115	0.920345	LQ	0.993802	0.945186	0.766102	LQ	1.01389	1.07595	0.643961	0.650403	0.880062	1.17143	0.761332	0.778742	0.21343	LQ	0.654053	0.729939	0.84	LQ	LQ	LQ	0.44446	0.843117	0.314826	0.813478	LQ	1.341
b0238	gpt xanthine phosphoribosyltransferase [multifunctional]	0.681224	0.823196	0.75473	0.544652	0.348194	0.567051	0.591799	0.641587	0.365946	0.589924	0.233351	1.16586	0.669137	0.907861	0.814433	0.574151	1.1806	0.77305	0.86901	0.885103	0.627356	0.652366	0.568939	0.234283	0.344031	0.457567	0.579835	0.453728	0.643378	0.501135	0.606177	0.824122	0.505744	0.570833	0.242094	0.258835	0.456747	0.284683	0.734235	0.466549	1.17652	0.995665	0.335242	0.517574	0.31584	0.520058	0.377611	0.504316
b0239	frsA fermentation/respiration switch protein	0.972793	0.811639	1.23503	0.656502	0.185835	0.639912	0.68953	0.603186	0.789631	1.81419	0.164461	0.367729	0.902539	1.07435	1.09693	1.50297	0.811656	1.65333	1.75045	0.604912	1.00827	0.985488	1.26778	0.588607	0.776808	0.908112	1.0964	0.953417	1.17802	0.569661	0.725654	1.0101	1.10635	1.83006	0.98664	1.34601	0.783258	0.698567	0.464986	0.772927	1.38001	1.2883	1.1379	0.837566	0.526224	1.77337	0.37271	0.80607
b0240	crl Crl transcriptional regulator	2.3213	2.08465	3.1176	2.10736	1.92032	2.83216	0.746146	1.59871	1.46221	2.46047	2.6847	1.39152	0.864539	1.6383	1.94414	0.68308	1.82517	2.73748	2.56279	1.98215	1.7832	2.0145	1.89192	2.04449	0.533852	1.19319	1.89877	3.3099	1.38717	2.1464	2.57257	1.57251	1.29347	2.14878	3.87271	4.70136	1.32756	2.22591	1.23997	3.31274	5.14837	1.41199	1.90819	1.29405	4.66946	1.55998	2.63996	1.6228
b0241	phoE outer membrane pore protein E	8.9798	5.91143	8.46628	6.5424	7.61444	8.77476	4.68206	4.79498	5.43455	6.80293	5.96624	7.96223	1.48174	2.0188	8.73421	4.72654	10.6611	7.70536	7.5716	9.86374	7.61775	7.34347	5.91584	8.41389	7.95356	4.92562	6.73262	7.92324	6.29786	9.84279	9.38912	10.6707	7.48086	5.82273	15.1577	16.4353	9.8294	6.61751	6.10723	9.25	13.9387	5.57379	6.82136	6.11378	11.6372	5.32989	11.2286	8.79577
b0242	proB gamma;-glutamyl kinase-GP-reductase multienzyme complex	1.42481	1.18098	0.900793	1.30438	0.810327	1.17513	0.84699	1.21485	1.54317	1.13341	0.356309	1.66688	0.54489	0.933865	1.13581	3.32383	1.77386	1.61093	1.95497	1.52474	0.80478	1.28977	1.66273	0.347106	3.07049	0.958128	1.63459	1.02337	1.2478	1.18047	1.70432	1.83199	0.77759	1.5563	1.12231	1.8985	1.76392	2.17672	1.19261	1.65146	0.368155	1.54246	2.12251	1.22807	1.33517	2.81795	1.43255	2.16063
b0243	proA gamma;-glutamyl kinase-GP-reductase multienzyme complex	1.12033	0.854902	0.547021	0.600711	1.20989	0.670296	0.766984	0.555331	0.643793	0.769706	0.692543	1.22383	0.490392	0.539817	0.608607	0.442868	0.816276	0.579082	0.676751	0.868997	0.480265	0.611712	0.320978	0.164586	0.600326	0.424677	1.05961	1.2914	0.741801	0.530017	0.600959	0.599109	0.762396	0.558083	0.18936	0.152976	0.517733	0.608062	0.526127	0.850604	0.22225	1.16395	0.431556	1.19584	0.214511	0.988328	0.301076	0.339899
b0245	ykfI toxin of the YkfI-YafW toxin-antitoxin pair	0.924915	0.843955	1.35796	1.44731	0.516956	2.36614	1.68843	1.37936	0.794258	1.16217	0.674976	LQ	0.771382	1.21819	1.77925	2.15021	0.859091	1.31022	1.20114	1.16267	0.48401	0.802205	0.8238	0.570822	0.446106	1.18324	1.22177	1.1945	0.913309	1.29351	1.31273	1.013	1.76014	1.60198	0.283552	0.417159	0.836581	0.703713	0.713146	0.912611	1.62317	1.66039	1.24417	1.13527	0.447368	1.75247	1.015	0.409188
b0246	yafW antitoxin of the YkfI-YafW toxin-antitoxin pair	0.905914	0.83383	1.18599	1.01263	0.610409	0.649941	0.742674	1.44103	0.744016	1.29976	2.23153	0.78442	0.681029	1.29127	1.36493	1.22318	1.02046	1.30593	1.21368	1.43828	0.710975	0.680456	0.965314	0.667447	0.859525	1.01807	1.2907	0.753201	1.28264	0.916037	1.00404	0.836138	1.56022	1.30816	0.376211	LQ	0.63871	0.983381	0.468903	0.947529	2.11165	1.61066	0.817294	1.43573	0.56511	2.18169	0.545601	0.695369
b0247	ykfG CP4-6 prophage; predicted DNA repair protein	1.16618	0.654102	0.737879	0.483774	0.198944	0.395155	1.45138	0.687935	0.527016	1.24353	0.534325	0.417867	0.358647	0.937932	0.93368	1.02041	0.807751	0.569218	0.692626	0.633174	0.324174	0.347486	0.339172	0.319251	0.509707	0.286646	0.910122	0.390749	0.632576	0.947807	1.12971	0.649264	0.61397	0.968294	0.145441	0.182539	0.529274	0.368942	0.348827	0.844266	0.306794	0.976781	0.313652	0.615105	0.565547	2.03689	0.396783	0.622901
b0248	yafX CP4-6 prophage; predicted protein	3.15237	1.96129	2.14484	0.918366	0.250735	1.7284	3.61181	1.70347	2.7307	1.72092	0.350954	0.660682	1.28188	2.95745	1.51923	3.06443	1.9853	2.13101	2.17698	1.0328	0.969602	1.13534	0.600909	1.07677	0.337571	0.37141	2.81564	1.51019	2.7543	3.39519	3.46375	1.23066	1.3788	2.0287	0.258576	0.383139	3.05799	3.45317	1.78852	1.41906	0.295743	2.17984	2.25058	1.79029	0.678608	3.09238	0.348955	1.59944
b0249	ykfF CP4-6 prophage; predicted protein	2.26206	0.916197	0.479808	0.74464	0.398582	0.440827	1.53831	0.732977	0.568128	0.95793	0.361858	0.797023	0.426293	0.979927	0.916749	1.07206	0.774242	0.954026	0.948975	1.0327	0.488393	0.607688	0.703686	1.0304	0.790899	0.507378	1.3662	1.11731	0.833048	0.943285	1.20522	0.676056	0.814651	0.678344	0.554297	0.65715	0.643412	0.560768	0.322039	0.95884	0.400937	1.0022	0.609348	1.69852	0.549245	2.03971	LQ	0.41729
b0250	ykfB CP4-6 prophage; predicted protein	2.15838	1.56655	0.527737	2.1426	0.464835	0.313635	1.56356	1.78908	1.92019	2.86507	0.249314	2.23206	0.82566	2.24609	1.98578	6.75506	1.79065	1.59385	1.61887	1.12406	0.645528	0.754947	1.18545	3.94711	5.65112	3.06537	3.35423	1.47673	3.19596	1.44469	1.48535	3.41845	2.248	0.553192	7.10005	6.52835	1.24468	1.56528	1.63857	4.31843	0.367681	1.47059	2.15005	1.63179	4.14893	3.53669	2.21579	0.362271
b0251	yafY CP4-6 prophage; inner membrane lipoprotein	0.781347	0.707982	0.951681	1.01162	0.69195	0.689315	1.28193	0.477015	0.632672	0.877123	0.225628	0.732739	1.1719	1.16556	0.681765	0.465514	1.04642	0.545685	0.654528	0.916643	0.461757	0.623107	0.641395	0.782153	0.246062	1.1951	1.41432	0.734422	0.762716	0.505023	0.567772	0.580338	0.643767	0.715827	0.261133	0.372583	0.447201	0.898542	0.895384	1.22738	0.284574	1.06945	0.427041	0.717843	0.62782	0.703071	0.648167	0.490329
b0252	yafZ CP4-6 prophage; conserved protein	0.898073	1.33736	1.88892	1.03408	0.575696	0.952615	1.12394	0.754268	1.19519	2.85307	1.09999	1.34847	0.387381	2.39678	1.16066	0.974322	1.43494	1.28978	1.36592	1.47387	0.296007	0.286857	2.81579	0.856522	1.35963	0.657897	1.71304	2.0554	2.04183	1.20088	1.20844	0.95128	1.39689	1.06443	0.260569	0.199507	1.20086	1.2683	0.345594	1.92854	0.276614	1.60789	1.70157	1.31922	0.690483	2.8772	1.64337	2.93218
b0253	ykfA CP4-6 prophage; predicted GTP-binding protein	0.984652	1.13718	0.658889	1.83538	0.674619	0.538069	1.02517	0.933093	0.636092	1.08297	1.01668	0.795182	0.737219	1.53776	0.790879	0.806261	1.08479	1.01426	1.13564	1.01073	0.643156	0.745998	0.628936	0.743526	1.56434	0.667606	1.45257	1.49372	0.970347	0.969008	1.10012	0.742158	0.831534	1.16355	0.599151	0.764691	0.531724	0.735173	0.358967	1.3833	0.477695	1.31856	0.624045	0.871467	0.430183	2.58834	0.717741	0.448339
b0254	perR PerR transcriptional regulator	2.20851	1.90385	1.47079	2.09033	1.66988	1.97878	0.640357	1.29798	1.79144	LQ	2.33351	LQ	1.27064	1.41219	2.09028	2.22766	1.98837	1.42246	1.26892	1.85186	3.5905	2.84566	1.79335	3.60093	0.457735	3.19612	1.08339	2.77749	1.63267	2.41487	1.9626	0.951158	1.50058	1.51747	5.79086	4.10144	3.12232	3.58608	2.4157	1.50447	0.891188	1.84836	3.89089	2.40368	2.95056	0.669147	4.93816	1.82396
b0255	insN-1 CP4-6 prophage; partial regulator of insertion element IS911A	1.89211	1.32468	0.901873	0.879915	1.25774	2.34157	1.14386	1.04282	1.01019	2.75842	0.769841	1.40961	2.98367	1.88132	1.64496	1.32777	2.07982	1.19455	1.08727	0.940855	0.944854	0.994725	4.22285	2.02151	0.9594	1.43394	2.37432	1.383	1.58729	1.61303	1.50788	1.11346	1.20818	3.2074	0.549431	0.702241	0.829657	2.46685	0.994264	1.95545	1.17186	1.84814	3.47119	4.88744	1.08805	2.68341	1.38966	2.05841
b0256	insI-1 transposase of IS30	2.87394	2.30521	4.23675	2.3115	3.51139	3.99281	1.82083	2.37181	1.4384	1.75752	0.760368	1.99849	2.33321	0.629493	2.49906	2.83219	2.68027	2.32071	1.82126	2.50729	3.10465	2.37835	2.15821	2.9492	2.64831	2.48165	2.44824	2.80993	1.79584	3.24929	2.49928	2.72563	3.41184	1.32957	2.4557	1.88977	2.96385	2.34329	1.62167	2.2934	4.41346	1.77788	2.48199	2.32091	1.69231	2.15667	4.70807	3.92631
b0257	insO-1 CP4-6 prophage; partial transposase of insertion element IS911A, interrupted by insertion of IS30 element	2.98124	1.45207	2.37636	1.26444	0.453436	0.729736	2.89821	0.658304	LQ	1.59842	0.527277	0.650794	LQ	1.76378	2.01825	1.3661	1.5699	2.01161	2.03352	1.81169	0.619439	0.720483	0.883852	0.536231	2.31317	0.925264	1.97995	1.31822	1.76405	1.7651	1.89145	LQ	3.42497	2.8503	0.311689	0.371259	LQ	0.820651	LQ	1.07393	2.65074	1.85729	2.0748	1.70533	4.72534	2.89458	0.541738	1.09175
b0258	ykfC CP4-6 prophage; conserved protein	1.14052	1.003	0.891391	0.945315	0.598286	0.746329	0.57596	0.385544	0.827174	0.711404	0.240798	0.65738	0.396518	0.987604	0.716406	0.437929	0.768304	0.90628	0.911652	0.668674	0.665013	0.698951	0.996987	0.447772	0.937869	0.325525	0.828079	1.52655	0.84541	0.980261	1.02414	1.16056	0.610333	0.785401	0.924909	1.31417	0.641928	1.24429	0.86885	0.913284	1.21763	0.938709	0.888696	0.746292	0.340187	0.513016	1.00074	1.58752
b0259	insH-1 IS5 transposase and trans-activator	1.82432	1.76056	1.90715	1.62877	1.14075	1.29004	1.28855	1.02286	1.01205	1.1284	1.64646	0.849161	0.616198	0.657949	1.0004	1.50027	1.11754	2.60595	2.15544	1.41931	2.74221	2.29159	1.90086	1.54005	2.21476	1.38626	1.72408	1.62573	0.948802	1.79251	1.91422	1.16511	2.09492	1.38778	1.55382	1.36698	1.1763	1.30515	1.14921	1.39651	1.53673	1.40272	1.90484	1.30722	1.82587	1.36834	1.39315	1.98549
b0260	mmuP MmuP APC transporter	0.684187	1.59368	1.16901	1.23146	0.632645	0.329236	0.616058	0.706491	1.15583	1.22863	0.407045	0.219979	0.770658	0.886236	0.866302	0.64615	0.700997	0.95262	1.09875	1.0724	0.1788	0.237632	0.46051	0.21947	0.472002	1.71877	1.78697	0.434453	0.737439	0.732683	0.89805	0.477263	2.1617	0.634584	0.116103	0.136087	0.500601	1.55591	1.44706	0.933832	0.289697	0.723994	0.705601	0.805684	0.385352	0.628989	0.187136	0.169013
b0261	mmuM homocysteine methyltransferase	0.625172	0.794809	0.501003	0.382941	0.800435	0.43385	0.701935	1.89617	0.820469	0.859915	0.203332	0.375458	0.348823	1.26287	1.30116	1.88392	1.0653	1.14872	1.3102	0.252535	0.87013	1.0531	0.75209	1.93719	0.435201	0.1936	1.08045	2.05156	1.65767	0.881941	1.05049	0.430852	1.61453	0.559402	0.133024	0.089129	0.934656	1.53226	1.19096	0.520693	0.343873	0.780193	1.78202	1.3281	5.65763	0.705497	0.59079	0.791928
b0262	afuC CP4-6 prophage; predicted ferric transporter subunit/ATP-binding component of ABC superfamily	0.418361	0.793175	0.599145	1.27309	0.193007	0.441889	1.46026	0.687256	1.00153	0.721079	0.154586	0.572219	1.12914	0.842441	0.892634	0.503593	1.0365	1.34465	1.46859	0.518328	0.291086	0.41232	0.543057	1.77447	0.535551	0.362719	0.976992	0.32738	0.966972	0.589519	0.681349	0.622755	0.478993	0.453829	0.16982	0.203218	0.5913	2.10297	0.723256	0.589562	0.624425	0.597713	0.203281	0.429207	0.327511	0.409279	0.414302	2.39422
b0263	afuB AfuB	0.543736	0.812802	0.763056	0.583684	0.383926	0.609087	0.838125	0.711349	0.550895	0.817023	0.368246	0.837528	0.837638	0.811455	1.06949	0.801915	0.971676	0.785273	0.974116	0.540009	0.451144	0.678421	0.669197	0.409183	0.526894	0.536798	0.979882	0.88624	1.01926	0.631042	0.929995	0.591046	1.11157	0.665804	0.433298	0.589985	0.746381	0.775627	0.484572	0.787465	0.440299	0.978177	0.469544	1.07058	0.461351	0.686437	0.474676	1.20159
b0264	insB-2 IS1 protein InsB	1.83497	2.28596	2.05153	1.64558	0.968489	1.59409	0.839894	1.49986	1.47599	1.5935	0.964147	2.06331	0.752514	1.25048	1.59462	2.90869	1.72679	2.78432	3.33548	1.51781	2.70219	3.29997	1.65136	3.76555	1.72959	2.23955	2.15526	1.62866	2.20033	1.6252	2.13049	2.07427	1.08034	1.26528	2.78483	2.9597	1.50458	1.70476	2.0343	2.02185	3.86533	0.948696	1.60062	1.8339	2.30577	1.50608	2.41643	1.12963
b0265	insA-2 IS1 protein InsA	1.53096	1.75309	1.2882	1.82737	0.829318	1.24083	0.809039	LQ	0.905541	LQ	0.850718	LQ	1.02387	0.791469	1.05532	1.65544	0.880755	1.46331	LQ	0.906665	0.841	LQ	0.959358	1.81517	0.82724	1.04585	1.60688	1.05034	0.957796	1.18149	LQ	1.01402	2.77481	1.76752	0.569895	LQ	0.953198	0.824849	1.29473	1.44298	1.65189	1.9126	1.36128	1.72	0.806904	1.61732	1.13266	1.66619
b0266	yagB CP4-6 prophage; conserved protein	0.6945	0.93583	0.997468	0.786968	0.577732	0.855139	1.51406	1.44356	0.994841	1.11888	0.417835	0.897834	0.953391	0.862154	1.69611	0.917703	1.5435	1.32375	1.26463	1.41807	1.88241	1.62587	1.66265	0.461923	2.17935	1.02839	1.517	1.24085	1.24008	1.50016	1.40223	0.931666	1.00301	1.70191	0.327466	0.477296	0.788173	1.49223	1.74938	0.893206	0.583804	1.12528	1.68322	1.05893	0.444217	1.50679	0.684776	2.28689
b0267	yagA CP4-6 prophage; predicted DNA-binding transcriptional regulator	0.486004	0.683233	0.438261	0.626315	0.277673	0.278019	0.533409	0.47129	0.520215	0.685115	0.310734	0.751093	0.341728	0.714078	0.746007	0.799108	0.715291	1.09991	1.12184	0.407762	0.396322	0.500741	0.4938	0.432898	0.339128	0.49574	1.13351	0.605164	0.867993	0.504912	0.575283	0.545519	0.543961	0.875197	0.343775	0.35995	0.268451	0.320376	0.537316	0.507545	0.193207	1.04812	0.674641	0.820629	0.290463	0.513401	0.404737	1.66353
b0268	yagE CP4-6 prophage; predicted lyase/synthase	0.540464	0.460167	0.42342	0.276091	0.285144	0.192053	0.560899	0.300689	0.424112	0.659919	0.225028	0.437017	0.348541	1.36091	0.644338	0.495906	0.774837	0.676117	0.697024	0.59133	0.426083	0.508152	0.275161	0.115231	0.675419	0.205224	0.608908	0.272229	0.478574	0.240238	0.384988	0.38349	0.313093	0.391849	0.204832	0.276988	0.273597	0.54824	0.466524	0.366122	0.104114	0.689873	0.225361	0.394842	0.786546	1.18071	0.355206	0.746913
b0273	argF ornithine carbamoyltransferase	0.62829	0.571357	0.344809	0.500022	0.678377	0.209122	0.358489	0.520611	0.482883	0.66722	1.55337	0.421837	0.389263	2.41604	0.775471	0.75923	0.69062	0.725809	0.835744	0.998897	0.246472	0.391627	1.15819	0.426259	0.215459	0.407961	0.787897	0.42034	0.823296	0.532944	0.5795	0.409763	0.466884	0.539481	0.52197	0.735705	0.344766	0.911969	0.387278	0.672456	0.310205	1.04916	0.358307	0.564164	0.574647	0.58381	0.341681	0.364195
b0274	insB-3 IS1 protein InsB	1.8195	2.25995	1.9161	1.63419	0.945156	1.57002	0.808096	1.42198	1.40698	1.55368	0.896592	1.86364	0.722518	1.22986	1.53225	2.86713	1.65549	2.59582	2.93104	1.44402	2.66466	3.04981	1.5999	3.65192	1.57445	2.14711	2.03169	1.59904	2.0722	1.59484	2.10603	1.95015	1.16067	1.30649	2.52484	2.68325	1.3336	1.65374	1.89633	1.91552	3.69111	1.05664	1.56602	1.84432	2.19222	1.47403	2.32839	1.10636
b0275	insA-3 IS1 protein InsA	1.50275	1.61599	1.30258	1.6638	0.812526	1.21172	0.813934	LQ	0.914984	LQ	0.861869	LQ	1.07339	LQ	1.0456	1.632	0.880441	1.45599	LQ	0.938923	0.855849	LQ	0.912975	1.71313	0.888673	0.997769	1.60422	LQ	0.940894	1.11666	LQ	1.03369	2.7612	1.80885	0.587653	LQ	0.964104	0.85789	1.34305	1.52111	1.50778	1.96174	1.30754	1.59498	0.6824	1.80389	1.14891	1.78817
b0276	yagJ CP4-6 prophage; predicted protein	2.4264	1.6703	2.67114	2.36132	1.53269	1.78255	0.962513	1.04939	1.89375	1.79334	0.418299	1.07668	1.08195	0.963735	1.62888	1.53933	1.93046	2.31381	2.27122	0.889341	2.10384	2.27937	2.649	2.08821	1.40201	1.56019	2.2132	3.10501	1.82779	1.88869	1.74657	2.91318	2.84264	0.919643	7.06244	6.20186	1.65822	2.61945	3.32898	2.12361	1.96159	1.61982	2.63063	1.78945	1.10598	1.27534	1.51346	2.51764
b0277	yagK CP4-6 prophage; conserved protein	5.54796	3.98932	5.67884	4.59047	6.40351	6.83861	3.47013	3.78369	3.15917	2.67159	4.33545	5.35113	1.80875	1.08481	6.24743	6.06659	5.15075	4.77823	4.03468	5.66299	8.85872	7.10757	3.99481	3.9493	6.03928	7.28906	3.84561	4.23097	6.75511	4.79572	3.77827	5.37459	4.38516	4.36334	12.9814	10.0714	6.97936	5.50088	5.72617	4.95636	7.53555	3.45182	6.34624	6.34619	5.55818	5.87365	7.93848	10.1265
b0278	yagL CP4-6 prophage; DNA-binding protein	4.01892	4.72975	7.12888	9.69129	13.8371	5.89308	1.87	LQ	3.8578	LQ	2.00447	LQ	3.04861	1.33692	8.90511	3.40612	10.5207	6.26351	4.0127	4.58815	10.9695	7.51699	3.78341	10.6582	3.31486	11.7387	4.6908	10.6273	3.50029	5.31482	4.07639	13.8927	6.78521	3.50451	19.4064	16.6841	6.78452	8.97077	8.38774	11.5195	9.65543	2.61663	12.5055	3.6899	17.0161	3.07729	14.3306	7.76787
b0279	yagM CP4-6 prophage; predicted protein	4.29914	2.90237	1.98539	5.26093	8.53859	3.58789	1.37082	2.92637	1.81632	2.86076	0.618707	5.36489	2.88007	1.22687	5.32658	0.92799	4.87306	3.21559	2.94075	3.84346	8.75091	6.67158	2.69939	9.14023	3.27845	6.74632	2.69654	8.27589	1.9233	3.30735	2.97087	11.0802	3.74491	1.46438	17.0605	11.3606	4.55798	4.14122	6.32855	8.21762	9.91681	1.86296	8.75233	2.54851	15.0284	2.10366	10.7037	6.41727
b0280	yagN CP4-6 prophage; predicted protein	8.4676	3.01531	3.02908	4.63753	10.3435	11.6728	1.74009	3.11429	2.90941	1.1107	0.438794	LQ	2.63705	0.654175	2.93691	4.69735	2.02541	2.20446	2.00832	2.37076	5.95397	4.23041	4.80719	3.35328	0.473197	16.6135	2.29878	6.57705	6.86166	4.7819	4.22876	2.9238	5.56319	1.80869	8.28346	6.3259	5.84939	9.05103	3.44081	6.34584	7.54893	2.13239	9.77944	5.41375	10.7041	0.780274	6.96587	3.96065
b0281	intF CP4-6 prophage; predicted phage integrase	2.75712	1.55232	1.79281	2.54316	4.46917	2.29621	0.629727	0.983547	2.17469	1.17283	0.264156	LQ	1.47963	0.764796	3.10211	1.8382	1.53057	1.15986	1.02942	1.55989	2.69514	2.68051	1.15029	0.629996	1.55277	3.78873	1.31359	1.46834	1.84145	2.20005	1.92288	3.18521	1.76289	1.48838	8.29888	7.26505	4.19178	4.09063	3.00016	2.81535	3.45136	0.823864	1.05425	1.49443	2.80998	0.885724	3.89083	2.34298
b0282	yagP predicted transcriptional regulator LYSR-type	0.748698	0.760875	0.63294	0.455606	0.554469	0.813785	0.954037	0.648003	0.502821	0.658895	0.301914	0.479946	0.627556	1.13004	0.440014	0.672739	0.39057	0.595136	0.626279	0.436447	0.280341	0.330715	0.532994	1.97927	0.263482	0.360526	0.862789	0.528801	0.596793	0.792738	0.792515	0.468744	0.613582	0.67047	0.34733	0.506375	0.61686	1.22358	0.301758	0.935801	0.275893	1.1262	0.741415	1.55995	0.280516	0.976778	0.573864	0.712384
b0283	yagQ conserved protein	0.525904	0.754938	0.876378	0.499326	0.355421	0.425351	0.968635	1.25113	0.480076	0.760944	0.137795	0.388511	0.489387	0.715704	0.703313	3.36795	0.66748	0.709938	0.759059	0.481427	0.181005	0.263874	1.73957	0.203365	0.2199	0.533372	1.24319	0.637723	1.28347	0.507471	0.636577	0.721145	0.304741	1.28438	0.248073	0.339312	0.658041	0.409097	0.209829	0.396364	0.130853	0.868913	0.268398	0.356389	0.133679	0.437129	0.420707	0.565147
b0284	yagR putative molybdenum cofactor-binding oxidoreductase	0.712381	0.656702	0.539823	0.49417	0.339708	0.344151	0.737637	0.513699	0.408861	0.825428	0.273881	0.631368	0.430463	0.845106	0.652389	0.891853	0.732612	0.859186	0.858074	0.496935	0.657027	0.7014	0.694032	0.281492	0.668762	0.379535	1.00186	0.289643	0.613367	0.642004	0.751207	0.384287	0.753475	1.0212	0.853806	1.01144	0.329711	0.518205	0.551773	0.554159	0.394415	1.15907	0.386526	0.687726	0.239794	0.658071	0.390589	0.433731
b0285	yagS putative oxidoreductase, FAD-binding domain	0.742457	1.06497	0.844177	0.812732	0.396402	0.497299	0.59957	0.808378	0.694861	0.755699	0.254269	0.76405	0.398934	1.70557	0.985525	0.692711	0.820489	0.738789	0.923342	0.479372	0.467069	0.608699	1.12553	0.439787	0.543735	0.339552	1.22126	0.951232	0.985449	0.626328	0.770802	0.584691	0.80133	0.761083	0.697102	0.967939	0.430582	1.09531	0.676862	0.600133	0.383653	0.955134	1.57926	1.18754	0.369089	0.611607	0.512311	0.857989
b0286	yagT putative oxidoreductase, Fe-S subunit	1.06846	1.44412	1.18043	1.37849	0.816069	1.08217	0.908634	1.66995	1.32245	1.33553	1.25135	1.05795	1.70907	1.16405	1.25762	2.22053	1.43052	1.57048	1.84835	1.74659	1.45299	1.59309	1.91174	2.41137	1.00103	1.247	1.63981	1.70642	1.32941	1.79651	1.97985	1.4507	1.49334	1.06851	0.468553	0.790833	1.45608	0.940311	2.08061	1.56764	0.726713	1.14957	2.41587	1.28126	1.59924	1.92438	1.81808	1.67549
b0287	yagU conserved inner membrane protein	5.9979	4.93231	5.74417	6.37169	11.5853	6.84576	2.23922	3.85832	4.69785	7.29684	3.80305	9.11441	20.4311	6.20542	7.54825	7.87088	9.17301	7.50881	7.4315	7.85528	9.20889	8.12134	5.24257	6.84809	7.19415	9.84849	10.2971	9.49198	10.1134	6.66388	5.21191	12.6049	9.69901	4.84837	18.332	17.1072	5.91011	7.77845	7.08619	10.1158	12.4508	6.78942	8.98505	10.1513	14.3848	11.2846	9.04863	12.2142
b0288	ykgJ predicted ferredoxin	3.82632	3.09075	3.03682	3.00799	6.71235	4.95189	0.778817	4.72275	3.73717	2.66995	0.60304	4.02716	3.00533	4.53679	4.86543	1.72287	6.06903	3.07381	2.62784	1.86762	6.1255	5.87398	6.41419	3.64791	2.51607	5.28522	4.00571	4.24788	1.96604	2.97072	3.12746	6.04785	4.66885	1.39674	6.98316	LQ	4.83212	2.3945	3.30463	3.83763	4.44236	2.04486	3.05283	3.47442	4.33013	11.6763	3.23383	6.8253
b0289	yagV conserved protein	1.56605	1.38399	0.93532	2.1031	1.20529	0.847053	0.584641	1.83087	1.01402	1.40057	0.271916	0.974344	0.639664	1.25067	1.41751	1.38674	1.32599	1.22033	1.38819	0.919768	1.77112	2.21885	1.25267	1.63425	0.683186	1.00364	1.62563	2.55315	1.64836	1.1945	1.35086	1.26733	1.85326	0.715339	1.86776	2.32877	1.06985	1.07064	0.915995	2.17387	1.8623	0.834795	1.35922	0.502758	3.14926	0.685734	0.95321	1.77989
b0290	yagW predicted receptor	0.962906	1.19664	0.99412	0.787195	0.490851	0.885014	0.514723	0.883069	0.731324	0.798387	0.64702	1.82896	0.537027	1.00807	1.07734	0.665276	1.03865	1.01913	1.11438	1.86547	0.605188	0.671236	0.780311	3.66775	2.6811	1.36907	1.13481	1.61812	1.43839	1.15104	1.57064	3.89094	3.93961	2.63603	2.82878	6.58659	0.628895	0.469704	0.710699	1.08632	0.347646	0.956877	0.339831	1.11962	8.44137	1.22432	0.801063	5.74525
b0291	yagX predicted aromatic compound dioxygenase	1.46865	1.2303	0.826596	0.795694	0.40186	0.972552	0.546839	0.783577	0.614476	0.743586	0.123618	0.593254	0.579804	0.865042	1.06182	0.47839	0.826517	0.792576	0.826489	0.604771	0.880639	0.915789	0.350166	0.784103	1.11483	0.666926	1.06122	0.645048	0.829898	0.935666	1.04053	0.755025	0.576989	0.617733	0.622738	0.722136	0.610666	1.03999	0.420559	0.837775	0.481803	1.32252	1.33615	0.829008	0.666906	0.469787	0.737497	1.00427
b0292	matC predicted protein	1.41614	1.39465	1.26183	0.567543	0.401494	1.3367	1.58757	0.879101	1.19161	1.34703	0.276142	0.864801	0.395295	0.612893	0.828193	0.931417	1.11025	1.04368	1.12447	0.96359	0.90223	0.975868	0.788119	1.86807	0.363158	0.995742	2.23413	0.447805	1.68938	0.810772	0.944964	0.836228	1.58351	2.48577	0.321202	0.456278	0.988672	0.937803	1.53306	1.01603	0.282041	1.74095	0.379874	0.533408	0.536845	0.69019	0.362352	0.617912
b0293	matB conserved fimbrillin	1.44136	1.3972	2.21206	0.924152	1.22906	2.05608	0.844619	0.561292	1.11436	1.4768	0.513165	1.63628	0.468583	0.487704	1.59704	0.994524	1.38623	1.84781	1.67694	1.94825	1.54381	1.44205	0.813091	5.42392	0.727611	0.739361	1.21269	1.13531	1.3407	1.84572	1.64518	1.08515	0.993067	1.62021	0.515097	0.771021	0.984486	1.66744	1.4901	1.0836	0.47958	1.76141	1.09621	1.20718	2.14622	1.17268	0.529008	1.74371
b0294	matA predicted regulator	5.73606	4.24838	4.01436	4.17361	3.57666	6.69962	1.46809	LQ	2.50471	LQ	1.04111	LQ	1.79096	1.13941	5.6372	1.28175	5.70808	4.31805	3.94927	3.14211	3.86176	LQ	4.42133	4.89354	4.74176	3.88181	4.45652	2.76526	2.58468	4.85792	3.16158	6.02596	3.62442	2.347	12.0434	LQ	4.82068	3.37501	3.52305	4.35574	3.38229	2.08839	3.31143	4.45848	3.71824	2.92021	9.42883	6.07118
b0295	ykgL predicted protein	4.25608	2.84072	3.58037	2.57593	2.36892	4.33099	1.36766	0.7025	1.01917	1.01213	0.611724	2.44309	1.01823	0.367434	0.942399	6.06964	1.79569	2.88705	2.16832	1.14747	2.28985	1.50109	2.7896	5.40246	1.39745	6.65959	1.61741	4.54623	1.73883	5.4964	4.5732	1.43275	7.29354	4.91068	10.1804	6.26677	1.20237	3.97126	1.5094	3.0407	7.52713	0.850284	7.4826	1.07792	10.2866	0.781765	6.93754	1.4357
b0296	ykgM predicted ribosomal protein	1.57238	1.35697	1.19177	1.34282	1.00122	1.53749	0.669521	1.0226	0.933486	0.99708	0.709734	LQ	0.818518	1.06407	1.20871	1.0662	2.11594	1.24556	1.15545	1.14567	1.77121	1.38577	1.07843	0.632067	3.24055	1.55272	1.15233	1.48526	1.24174	1.29794	1.4754	1.60024	1.23344	1.25923	2.26273	LQ	1.20137	1.12964	1.45417	1.14578	0.727968	1.13427	1.07726	1.06734	0.733496	0.969835	2.07642	1.00827
b0297	eaeH	3.54864	4.93896	4.51683	4.08999	3.7239	5.43397	3.70698	2.66022	2.47652	3.93665	3.06296	2.78802	1.87932	0.832713	4.83352	3.7151	4.73283	4.20441	4.43561	5.18904	4.52918	4.68971	3.41235	4.13286	4.64264	5.84211	5.45715	4.90152	3.94877	4.44744	5.01344	3.72151	2.04158	5.67452	1.18231	1.26694	4.61037	4.08493	3.57242	4.76112	7.56644	4.54895	4.46634	4.43459	6.47774	8.08756	1.54642	8.24173
b0298	insE-1 IS3 element protein InsE	2.06269	1.90639	2.14553	1.8527	2.87026	2.15832	1.30497	0.92391	1.194	1.11896	1.25177	1.24558	0.753842	0.853711	1.40907	2.42219	1.48714	1.55578	1.24828	1.23501	3.49566	2.48108	3.3711	3.5393	1.30858	2.30832	1.35036	2.33899	1.4406	2.13869	1.72357	1.3378	1.58777	1.27985	0.40447	0.569414	2.67147	1.78977	1.4175	1.97361	2.75139	2.10945	2.32955	2.34824	0.544046	0.964285	1.3395	1.97566
b0299	insF-1 IS3 element protein InsF	1.15247	1.6045	1.53067	1.7633	1.77783	1.17306	1.6484	1.47576	1.05655	1.44798	1.21759	1.65787	0.446776	0.539211	1.75086	1.5916	1.91515	1.6081	1.67753	1.67951	2.39251	2.23664	2.12518	2.88466	1.40069	1.47169	1.68495	1.25442	1.80531	1.74197	2.12273	1.2846	1.53244	1.57392	1.30264	1.63299	1.21459	1.84168	1.42554	1.51528	1.63182	1.52905	1.16044	1.64406	1.48331	2.99108	1.39715	2.15261
b0300	ykgA predicted DNA-binding transcriptional regulator	9.10902	5.66356	8.96554	10.5211	14.977	9.09914	2.24596	LQ	4.61106	6.76759	4.95781	LQ	2.49771	3.21997	6.60886	2.76176	9.08592	7.36815	6.92355	3.77517	8.55048	7.20064	4.07857	15.4206	5.15987	13.7953	6.35318	10.772	6.49287	6.43871	6.08889	14.3503	8.96698	4.28226	23.1888	26.6753	5.35505	10.2136	7.32143	13.1229	10.9025	2.67484	13.8356	5.31535	10.3771	4.73148	15.4156	12.0242
b0301	ykgB conserved inner membrane protein	6.57323	4.25643	5.99101	5.74508	8.2477	6.64787	2.61547	3.71628	2.49323	4.58826	2.95962	5.94215	1.70762	0.862771	5.29365	6.56427	4.97997	5.29873	4.272	4.94325	6.64709	6.13668	6.00917	4.03181	5.11356	7.43496	4.94975	6.4395	5.27348	7.08726	6.36171	5.91354	6.23851	3.84916	13.3823	9.74832	5.10277	4.32794	4.63629	7.21384	8.05213	4.02642	8.11737	5.52767	12.2514	7.12221	10.4353	7.49069
b0302	b0302	1.13882	1.13196	1.32386	1.40062	1.15632	1.07734	1.4091	1.02448	2.84761	1.15108	1.57165	LQ	4.02183	1.04869	5.83863	1.67833	5.26437	1.20455	1.20602	4.58718	1.19177	LQ	1.47243	1.11334	2.28102	1.42038	1.36967	1.31756	1.45544	1.12191	1.21364	9.53378	1.74006	1.677	1.13535	1.1819	4.95356	1.23384	7.10055	1.33808	1.28984	1.97547	1.15223	1.5568	1.39628	2.1604	1.61097	8.38025
b0304	ykgC predicted oxidoreductase with FAD/NAD(P)-binding domain and dimerization domain	19.2452	11.8084	15.4967	11.6665	29.0579	20.7875	4.53409	10.0401	4.46233	LQ	9.03518	LQ	4.48135	1.53803	5.68908	8.15824	6.62075	13.7615	15.175	7.02132	19.2593	18.0321	12.6679	14.2076	6.68688	27.4503	17.0448	25.4842	12.4245	16.719	16.3001	9.87419	22.7976	7.91683	49.5366	51.7909	6.58046	17.1669	5.56571	24.3818	36.7385	7.38842	27.6668	15.1054	24.3023	9.35378	29.6027	11.483
b0305	ykgD predicted DNA-binding transcriptional regulator	6.38584	4.19223	5.79845	6.57797	8.45829	2.87839	2.27367	2.89787	2.90053	7.56726	1.42101	5.12168	0.511979	0.759945	5.62745	2.13985	5.66601	6.01882	6.21119	4.69492	6.05967	7.19678	4.33577	8.88364	3.04157	3.08238	5.92867	7.14649	4.80793	5.43809	7.0817	8.02361	2.47743	3.6495	8.52434	10.9605	5.45348	3.88961	3.11227	7.39466	14.4975	5.35916	6.88907	2.29023	13.9954	12.4285	6.91731	8.88717
b0306	ykgE predicted oxidoreductase	3.7826	3.09452	2.61348	2.6717	1.31789	3.48585	3.04874	1.34714	1.80181	2.11784	3.20791	3.46858	0.730021	0.896937	2.44877	1.31533	4.16288	2.61592	2.55169	3.65011	2.23102	2.19073	4.27256	4.83824	2.50226	3.47063	3.39387	1.89577	2.12907	4.86234	4.49192	3.64045	3.82284	5.60629	2.23941	2.44982	2.6179	2.3326	3.33845	3.7057	5.54462	6.1139	2.26308	2.87649	1.48134	3.92266	2.20411	2.71896
b0307	ykgF predicted amino acid dehydrogenase with NAD(P)-binding domain and ferridoxin-like domain	2.07026	2.01519	1.83394	3.36953	0.838255	1.68482	1.4318	1.2791	1.38362	1.92969	2.96073	1.38806	1.0976	0.729644	1.84218	3.6562	1.67505	1.78065	1.86906	1.65636	1.40426	1.53676	1.65098	4.21335	0.976229	2.20605	2.46132	2.43262	3.4151	1.83277	1.88126	2.61136	3.94156	2.27151	2.29391	3.15647	1.73523	1.37403	2.49718	2.38587	1.13203	1.81532	2.5358	3.377	1.46514	1.43479	1.85518	2.50316
b0308	ykgG predicted transporter	2.11781	1.61109	1.91019	1.74489	1.09781	0.799517	1.32954	1.5282	1.20172	1.34631	0.743747	0.936291	0.723272	0.744235	1.67777	2.36614	1.65179	2.17282	1.92014	1.81637	0.877858	1.09145	1.74828	2.3867	0.791118	2.07022	1.88904	2.55962	1.57125	1.32291	1.39276	1.44604	0.872139	1.70446	0.859027	1.06975	1.76561	1.5715	1.90961	1.58601	4.59289	1.44118	0.646215	1.23763	0.584842	2.07968	0.982367	2.40142
b0309	b0309	1.78996	1.63417	1.64719	1.80522	2.56389	2.39669	2.10745	LQ	1.67945	1.41447	1.95602	LQ	1.25473	1.07232	3.85279	1.47217	9.15788	1.54416	1.96177	2.64227	1.50154	1.73778	2.62811	2.03659	3.02844	LQ	1.73649	1.97293	1.81338	1.772	2.35421	1.60747	2.69781	2.51373	1.22876	LQ	1.62687	1.17662	1.20889	LQ	2.37483	2.39258	2.05948	1.76765	2.35695	4.35286	2.42263	5.26898
b0310	ykgH predicted inner membrane protein	4.08354	3.12977	3.74252	3.39514	3.60027	2.55396	0.500434	4.98824	5.52667	3.32712	0.342685	4.8771	1.28553	0.610208	3.23937	0.703315	14.6826	6.37417	4.90253	2.05102	10.28	5.89019	2.50048	3.42485	0.662172	6.5394	2.22789	3.89474	1.53142	3.6542	2.59504	8.39021	1.83051	1.26862	20.967	14.1827	4.16156	3.74898	6.62709	6.98482	7.09833	1.00035	7.85314	1.93041	7.07023	1.29525	9.21215	2.86295
b0311	betA choline dehydrogenase	0.401631	0.570536	0.703467	1.03048	0.684982	0.431781	0.247081	0.376131	0.354655	0.774992	0.212392	0.709957	0.156035	1.16093	0.798361	0.289054	0.57361	0.99453	1.25008	0.793871	0.397143	0.619772	0.90065	0.212992	0.809887	0.351031	0.812682	0.439656	0.419119	0.440338	0.57691	0.705748	0.492347	0.644761	0.310749	0.528772	0.615562	0.961723	0.311121	0.721505	0.238888	0.737635	0.32568	0.372039	0.449079	0.967388	0.374923	0.955847
b0312	betB betaine aldehyde dehydrogenase	0.382961	0.591406	0.980184	0.53186	0.248769	0.310156	0.595093	0.758811	0.610123	0.826814	1.0399	0.6428	0.20679	0.418886	0.611288	0.614296	0.658247	0.869568	0.967992	0.816814	0.226605	0.285352	0.424045	0.562092	0.155638	0.345054	0.76013	0.360082	0.546513	0.525002	0.508567	0.608512	0.724288	0.856667	0.193021	0.157374	0.332914	0.695249	0.324219	0.657596	0.311765	0.74056	0.259676	0.538561	0.622876	0.780796	0.368843	1.03343
b0313	betI BetI transcriptional repressor	0.879073	0.531001	0.411966	0.238077	0.179388	0.331824	0.301812	0.242578	0.63895	0.535547	0.271826	0.352801	0.277779	0.291709	0.864254	0.889894	0.692666	0.793718	0.68034	0.468343	0.242143	0.296571	0.653172	1.99546	0.22955	0.6743	0.538549	0.448682	0.98199	0.56884	0.583748	0.526681	0.464028	0.493289	0.500903	0.372613	0.449671	1.49802	0.996467	0.386611	1.71676	0.651686	3.363	0.533556	0.206352	0.250658	0.639538	0.438927
b0314	betT BetT choline BCCT transporter	0.84438	0.897872	0.726899	1.02598	0.456909	0.616517	0.761927	0.597268	0.538441	1.00762	0.529318	1.15062	0.615537	0.954074	1.01635	1.07771	0.84073	0.905988	0.945062	0.518444	0.858709	LQ	1.33635	1.12288	0.807258	0.600287	1.32149	0.844099	1.23776	0.732999	0.745825	0.80581	1.59101	1.2187	0.406106	LQ	0.703941	0.864464	0.498145	1.00027	0.760732	1.53771	0.642013	1.21726	1.18375	0.863895	0.663717	1.03958
b0315	yahA phosphodiesterase, c-di-GMP-specific	6.8493	5.56392	6.66208	5.69843	4.84795	7.75151	7.53049	2.82035	3.76402	4.37462	1.78962	3.82204	4.3666	1.39784	6.6762	5.43509	6.95718	5.37916	4.55618	7.73167	6.63742	5.21841	5.76752	9.11977	10.3854	6.85741	5.22109	5.8127	5.0017	6.37384	6.33097	9.0277	9.96462	8.23599	10.2507	8.95758	5.93959	4.81876	4.65008	6.30215	8.54519	6.42253	8.48831	4.17855	8.49654	9.19695	9.29215	13.2843
b0316	yahB predicted DNA-binding transcriptional regulator LYSR-type	2.39149	3.62996	2.34487	3.70058	1.28213	3.71211	4.24177	3.0425	LQ	2.12722	0.668864	1.84589	LQ	1.4252	2.61216	2.62027	4.0223	3.28476	3.75236	4.87378	3.3548	4.02404	6.20482	5.9205	4.0356	3.33166	3.28583	3.54735	2.53708	2.85395	3.19758	LQ	4.65345	8.21499	3.38894	4.96185	LQ	3.84733	LQ	2.7492	5.67901	3.83595	1.85727	2.80202	16.6353	3.01488	1.61769	12.2621
b0317	yahC predicted inner membrane protein	2.89011	2.90554	3.31948	2.49262	4.12402	4.48571	2.4978	1.2368	2.20698	2.31804	0.528665	2.21756	1.23741	0.895431	1.59311	5.69531	2.9373	2.01745	1.87559	3.42811	3.22559	2.96048	3.44629	5.75981	2.17693	2.18948	3.09745	2.82073	2.13205	3.49289	3.09372	3.4496	4.03615	2.41325	0.236149	0.365985	2.22441	2.61958	2.49869	2.98821	3.856	4.01359	5.84577	1.29914	2.26162	3.63992	3.76697	2.42116
b0318	yahD predicted transcriptional regulator with ankyrin domain	5.38319	6.25092	4.74898	4.96472	6.95762	7.18498	5.20962	2.61195	2.91967	3.48325	3.73065	8.65853	2.05903	1.06395	3.21433	9.80352	6.03149	5.32098	6.21124	4.92526	1.87587	1.77663	1.79359	4.67836	7.7763	4.04159	5.98941	4.30192	6.12371	6.17232	6.06356	4.06367	3.98513	7.35379	0.872709	1.14069	5.02713	5.70789	4.82768	3.86575	6.14483	3.91442	2.84805	4.82674	0.7094	4.82488	5.00942	3.39301
b0319	yahE predicted protein	6.9473	7.10293	6.23004	6.12301	6.33187	7.90499	7.20729	4.66301	6.01753	4.25217	8.18462	8.37089	2.26689	2.00937	7.21326	5.92761	8.34349	7.36293	8.00016	10.5961	7.6099	6.8038	7.71519	4.54509	10.897	6.92966	7.20169	6.06388	5.45887	5.58255	5.39219	7.70817	6.81226	8.31039	5.77773	5.67802	6.73379	6.34467	7.12788	6.8857	7.86018	7.14746	6.09695	3.92104	7.45922	6.86513	6.85541	9.78566
b0320	yahF predicted acyl-CoA synthetase with NAD(P)-binding domain and succinyl-CoA synthetase domain	0.631481	1.71216	1.14326	1.23144	0.56051	0.925243	1.06846	0.733469	0.99727	1.03276	0.465974	1.36689	0.475441	0.681578	1.04925	1.45549	1.27668	1.50262	1.63314	1.1928	0.887922	1.16608	1.29122	0.551824	0.261756	0.83674	1.30201	1.16895	1.1911	0.767987	0.985098	0.976143	0.898065	0.866109	0.887732	1.01935	0.961816	1.73727	0.41512	1.05227	0.809627	1.51262	1.35446	1.51591	0.520986	1.45448	0.530216	0.831563
b0321	yahG conserved protein	0.560345	0.646961	0.592294	0.766468	0.77058	0.446636	2.03528	2.4495	1.14114	1.34857	0.439361	0.479159	0.270988	1.0306	0.71478	0.837085	0.665375	0.800401	0.905184	0.676899	0.352902	0.509371	1.15449	0.847226	0.898293	0.330143	0.839536	0.568357	0.737537	0.600939	0.640457	0.569133	0.534727	0.733932	0.247287	0.31202	0.310432	0.571696	0.138026	0.393656	0.283804	0.836503	0.322207	0.882082	0.383774	1.16233	0.4638	0.697392
b0326	yahL predicted protein	6.95365	3.96062	4.89646	5.59275	6.58114	6.81224	2.79001	3.46045	2.91458	3.61543	6.20218	6.43906	2.57485	0.610662	7.26007	5.58994	6.27914	4.62506	3.5403	5.41421	7.92157	6.18702	3.85226	4.26492	4.10091	7.69334	4.62361	8.68048	5.65144	5.60414	4.51756	7.67858	3.76101	3.42979	9.33362	8.024	6.25948	3.79538	3.39298	5.92919	7.19073	3.96512	6.07265	3.37099	12.4352	3.42162	6.38106	4.56281
b0327	yahM predicted protein	4.56325	2.93819	4.7498	2.94541	4.71224	4.20225	0.518215	1.56162	2.49359	1.55854	3.1601	LQ	0.8574	0.736578	4.09153	3.63115	2.06936	3.279	3.24565	5.01599	3.04702	2.83524	0.921347	3.18758	5.09192	4.25043	1.37375	2.13976	2.61344	4.55896	4.41339	2.50598	3.535	3.40583	4.02641	3.6041	5.97769	3.72484	6.25563	2.24022	3.75734	2.83931	2.14487	1.809	8.98877	0.51226	5.6401	0.926926
b0328	yahN predicted neutral amino acid efflux system	6.36064	3.39185	2.96961	4.60529	6.19001	3.34219	1.0999	3.10059	2.45885	2.80198	0.746477	2.81468	1.01434	0.384527	3.38971	2.28831	2.79853	2.83906	2.89333	3.6572	3.23603	3.17242	3.47841	10.9271	5.21926	4.12941	3.80781	4.56927	4.35118	4.70599	5.55741	3.37298	1.21261	3.14413	2.11958	2.30025	4.8731	3.39842	5.27137	2.86765	3.21244	3.25992	6.34349	4.52727	1.12648	1.41693	6.23897	3.83286
b0329	yahO predicted protein	1.62343	2.07802	2.52531	2.10335	2.06909	1.45379	1.59787	0.989455	1.59438	1.31332	0.675862	1.06236	4.55243	1.10609	3.75453	1.19125	4.98681	2.26662	1.63547	3.29327	5.31953	3.58171	1.63585	3.44787	3.71935	1.89275	1.80474	2.23594	2.0771	2.79594	2.01255	2.38367	3.18897	1.96795	2.40777	2.12002	3.65727	1.84311	1.93978	1.65265	1.49427	1.73873	3.11217	2.29953	2.18746	1.55352	4.38872	6.6749
b0330	prpR PrpR transcriptional dual regulator	0.315006	0.488629	1.08321	0.770997	0.265633	0.483902	0.855884	0.390429	0.634726	0.529135	0.138186	0.60476	0.47362	0.443522	0.555625	0.936755	0.586724	0.510813	0.489544	0.397817	0.574596	0.745135	1.16156	0.306926	0.403064	0.34894	0.873	1.0306	0.963119	0.628497	0.745187	0.350722	1.38362	0.340852	0.223141	0.324928	0.439889	1.21953	0.426103	0.677205	0.261402	0.77118	0.768897	0.786877	0.294603	0.62571	0.263849	0.705873
b0331	prpB 2-methylisocitrate lyase	0.409425	0.89453	1.02224	0.312851	0.334106	0.526478	0.324741	0.678493	0.732998	0.453685	0.247159	0.439037	0.362993	0.662655	0.710562	0.655934	0.666352	0.590033	0.729981	0.387235	0.867973	0.936785	1.02243	0.110036	0.776144	0.303263	0.602538	0.32433	0.70502	0.385706	0.518705	0.7418	0.380489	1.08799	0.0952378	0.112461	0.315918	1.66987	0.439207	0.805271	0.0886827	0.318891	0.180036	0.600489	0.295254	0.761218	0.263157	0.315017
b0333	prpC methylcitrate synthase	0.779821	0.786798	1.31564	0.376312	0.33942	0.445465	1.44501	0.298902	0.548019	0.758199	3.41347	0.63923	0.451217	0.624859	0.629574	1.12016	0.581726	0.381731	0.419508	0.627757	0.349726	0.417229	0.724039	1.35684	0.919017	0.590007	0.827241	0.284822	0.721104	0.502181	0.519057	0.579586	0.879659	0.906927	0.308376	0.266837	0.27173	0.165708	0.615545	0.515506	0.434007	0.583789	0.458112	0.784223	0.819572	0.65381	0.149939	1.05983
b0334	prpD 2-methylcitrate dehydratase	0.223185	0.51612	0.79538	0.427252	0.390812	0.619264	0.488098	0.44718	0.409361	0.458383	1.28096	0.347676	0.385891	1.17471	0.763377	0.395186	0.539092	0.408808	0.496146	0.514843	1.11496	1.28639	1.64235	0.427426	0.129528	0.270414	0.77183	0.58991	1.02263	0.454553	0.546502	0.455707	0.501924	1.5447	0.145069	0.188604	0.562237	0.304949	0.127386	0.747003	0.576039	0.678359	0.790895	0.496475	3.17151	0.867822	0.226111	1.0187
b0335	prpE putative propionyl-CoA synthetase	0.518966	0.621746	0.552791	0.600275	0.271002	0.538891	0.538044	0.325518	0.383187	0.599688	0.237567	0.591631	0.170628	0.855505	0.550256	0.505239	0.398957	0.701877	0.791055	0.633484	0.24158	0.346081	1.10873	0.361078	0.268942	0.313368	0.688435	0.426031	0.660103	0.424436	0.464447	0.48288	0.60137	0.580433	0.163792	0.170818	0.38766	0.406464	0.328716	0.604829	0.164077	0.764925	0.572288	0.784501	0.857622	0.935937	0.279475	0.608824
b0336	codB CodB cytosine NCS1 transporter	0.368121	1.22141	0.435879	0.898628	0.302386	0.948784	0.184921	0.362376	0.470704	1.15074	0.107478	0.671063	0.357323	0.586639	0.695076	0.377075	0.47651	0.834735	0.820201	0.777806	0.676491	0.746277	0.421974	0.475636	0.265046	0.577188	1.05622	1.72325	0.747345	0.529477	0.509204	0.469217	0.64533	0.622386	0.157872	0.0787619	0.308687	0.179032	0.0988546	1.06116	0.164009	1.5992	0.557309	0.832604	0.151989	0.421986	0.429671	0.808568
b0337	codA cytosine deaminase	0.596824	0.922663	0.449201	0.551959	1.45239	0.343231	0.43709	0.404173	0.952453	0.66382	0.236279	0.678155	0.510669	0.556632	1.25118	1.85229	0.479208	0.682471	0.711142	0.795765	0.533901	0.551148	0.35394	0.21726	0.296783	0.550575	0.995078	1.3351	0.908165	0.443248	0.421581	0.672554	1.00149	0.418804	0.164576	0.136107	0.73964	0.353817	1.00973	0.442733	0.13207	0.507789	0.472216	0.933588	0.514977	0.37962	0.347838	0.324774
b0338	cynR CynR transcriptional dual regulator	1.13181	1.16618	0.974356	0.765943	1.25466	0.41587	1.00044	0.794366	0.838028	0.630708	0.741772	0.685891	0.688366	0.913568	1.19735	0.706326	1.03288	0.982176	0.893259	0.982275	1.61753	1.3155	0.956801	0.454899	0.687906	LQ	1.03046	0.617844	1.02044	0.700601	0.830785	0.792483	1.49335	1.31742	0.327309	0.361774	0.791173	0.358169	0.990536	0.795414	0.292393	0.796315	LQ	0.83937	2.1908	0.90702	0.298544	1.68368
b0339	cynT carbonic anhydrase monomer	0.466717	0.872152	0.634142	0.936436	2.87918	0.413829	0.794032	0.536435	0.968342	0.845032	0.171579	0.607107	0.291584	1.34664	1.07738	1.59835	0.55563	0.834055	0.861716	1.36855	0.265134	0.357715	0.437618	0.345745	0.204251	0.326923	0.534775	0.554598	1.3998	0.584525	0.626385	0.619549	0.37886	1.67109	0.140636	0.157829	1.12779	0.484257	1.61763	0.810522	0.209859	1.15078	0.22659	0.481907	1.4615	0.930912	0.188472	0.35097
b0340	cynS cyanase monomer	0.600342	0.594925	0.830652	0.527615	0.978433	0.790855	1.23609	0.885735	0.817381	0.716583	0.361888	0.547153	0.967813	0.817509	0.694579	0.701949	0.452185	0.808388	0.828291	0.616111	0.349571	0.405344	0.690507	0.43933	0.358378	0.414379	0.8614	0.642878	0.808745	0.759255	0.816417	0.957369	0.75299	0.99444	0.236201	0.265184	0.725594	0.474091	1.07996	0.422908	0.216493	1.501	0.795988	0.565107	2.24416	1.85571	0.339051	1.27702
b0341	cynX CynX cyanate MFS transporter	1.24888	1.04906	1.2292	1.25236	0.351553	0.296699	1.0229	1.84738	0.715882	1.22741	1.03313	0.428785	0.215386	0.584588	1.22025	1.29756	0.884821	1.11678	1.18658	0.683347	0.515682	0.62818	1.9824	2.33924	1.45893	0.958533	1.72361	0.601853	1.0705	0.634866	0.716442	4.60047	1.59774	1.28925	1.07389	1.28994	0.349848	1.5705	1.05586	1.03197	0.496998	1.82231	0.47581	1.09107	6.26737	0.554308	0.265438	5.77937
b0343	lacY LacY lactose MFS transporter	4.29982	6.92226	4.60698	7.6671	6.0114	5.5995	5.56384	3.46336	3.97536	5.22162	4.27152	5.26899	2.46424	1.66247	4.77614	4.80477	5.79507	3.87064	4.51442	4.68273	8.97128	9.92968	6.006	1.93429	6.63626	5.40044	5.43038	5.47137	6.857	6.15116	7.52971	5.61933	6.65953	6.36339	5.13003	6.57783	6.29179	6.87884	5.18471	6.65531	7.37738	5.67324	6.72267	8.04402	5.20619	3.20189	2.3445	5.70073
b0344	lacZ beta;-galactosidase monomer	0.130417	0.138112	0.144551	0.12976	0.0897385	0.159132	0.17975	0.166884	0.144025	LQ	0.228388	LQ	0.245955	LQ	0.333192	0.220071	0.247616	0.180383	0.229718	0.189366	0.209089	0.330632	0.218353	0.0698399	0.1886	0.121899	0.25258	0.104175	0.231754	0.170792	0.25822	0.133295	0.279741	0.305179	0.143633	LQ	0.135993	0.126852	0.132088	0.138808	0.104149	0.318409	0.104794	0.251837	0.0881569	0.204848	0.141342	0.23588
b0346	mhpR MhpR transcriptional activator	0.818738	1.07059	0.786866	1.07987	0.119927	0.723566	0.75068	1.28047	0.983959	0.500678	0.226277	0.208919	0.386431	1.48331	1.16063	0.965193	1.00909	0.959284	1.013	0.493114	0.864141	0.900612	0.561781	0.122603	0.700075	1.1833	1.52103	1.32524	1.29272	1.62842	1.84424	0.406809	1.1188	0.846134	3.20931	4.79131	1.01587	1.39779	1.37685	0.359514	0.860139	0.817274	2.11876	1.81163	0.150569	0.483832	0.780767	0.707523
b0347	mhpA 3-(3-hydroxyphenyl)propionate 2-hydroxylase	0.524673	0.667953	0.935818	1.15135	0.466847	0.567519	0.968123	0.786463	0.651876	0.451313	0.113826	0.309833	0.251159	0.599888	0.737422	0.292563	0.462255	0.582592	0.654435	0.316189	0.448402	0.505223	0.272513	0.728129	0.269456	0.212247	0.798576	0.865853	0.953115	0.458949	0.549908	0.470233	1.33429	0.49576	0.133987	0.201112	0.396597	1.26511	0.985059	0.348876	0.207699	1.10828	0.545478	0.761471	0.114082	0.236214	0.270553	1.26936
b0348	mhpB 3-(2,3-dihydroxyphenyl)propionate dioxygenase	0.325367	0.599004	0.302693	0.579067	0.112689	0.244411	1.64084	0.844306	0.602444	0.886806	0.706613	LQ	0.660407	0.885971	0.915247	1.07293	0.596663	0.430711	0.432721	0.909483	0.14767	0.167543	0.310315	1.24051	2.34033	0.170582	0.54476	0.147573	1.37926	0.985755	1.14654	0.569781	0.445982	1.36682	0.225391	0.247465	0.385904	0.496757	0.379747	1.09065	0.126584	0.878107	0.41486	0.279689	0.509355	0.759496	0.946453	1.7354
b0350	mhpD 2-keto-4-pentenoate hydratase	0.825079	0.627545	0.439957	0.290169	0.885261	0.550932	1.23257	0.161464	1.04002	0.793847	0.976334	0.0851949	1.52646	1.54088	1.23226	0.0756091	1.12219	0.918016	0.904476	0.961573	0.382474	0.410404	1.36001	0.0409678	1.11962	0.21203	1.05737	0.607234	0.855483	0.627678	0.893879	0.912675	0.349003	0.566895	0.0649796	0.022809	0.928825	0.0843045	0.968048	0.718054	0.235134	0.52623	0.018275	0.561282	0.393821	1.54545	0.160159	1.10699
b0351	mhpF acetaldehyde dehydrogenase 2	0.382604	0.714358	0.362029	0.515424	1.09328	0.636541	0.825541	0.346207	0.684546	0.79362	0.640029	0.343528	0.758227	0.6998	0.902029	0.702215	1.0841	0.282392	0.455375	0.547752	0.128556	0.416956	0.442404	0.645189	0.497169	LQ	0.757632	0.559754	1.02532	0.797844	0.837254	0.517124	1.24825	0.211459	0.262381	0.327191	0.434801	0.561079	0.671422	0.455794	1.13631	0.559458	LQ	0.886637	0.121312	0.746854	0.102762	1.1755
b0352	mhpE 4-hydroxy-2-ketovalerate aldolase	1.09763	0.620941	1.29205	1.34881	0.421621	0.378009	0.704774	0.354096	0.870851	0.458967	0.233853	0.916715	0.288773	0.464939	0.873623	0.73338	1.101	0.776752	0.883745	0.306404	0.338743	0.348629	0.643637	0.464773	0.937033	0.204539	0.504501	0.651071	0.836212	0.445242	0.487156	0.487083	1.44747	0.691646	0.122627	0.120147	0.293249	0.662595	0.501721	0.636721	0.202329	0.601536	0.168162	0.715369	0.0950168	0.84526	0.227755	0.372902
b0353	mhpT MhpT MFS transporter	0.731647	1.11144	0.761805	1.40764	0.274148	0.829105	0.671505	0.36769	0.737049	0.556655	0.714019	0.891802	0.260943	0.45359	0.861662	1.31384	0.705898	0.948966	1.01058	0.809474	0.300022	0.285316	1.52648	0.244572	0.524957	0.24005	1.1992	0.331506	1.88007	0.984968	1.05448	1.45819	0.951637	0.629123	0.24028	0.306687	0.602122	1.56612	2.17203	0.616275	2.02535	0.902082	0.534668	1.04282	2.95673	0.60548	0.608388	2.56911
b0354	yaiL nucleoprotein/polynucleotide-associated enzyme	2.39391	2.81717	3.08737	2.29851	6.02144	3.37265	2.10445	2.22838	3.86072	1.79793	0.631405	2.02453	1.06642	0.66888	3.66694	5.9063	2.78294	2.66866	2.09749	2.85728	1.07601	0.810471	2.76338	3.07044	2.46978	5.6216	2.48664	5.10303	5.37617	4.98961	3.67887	4.64157	5.67037	2.40043	13.3891	12.9246	5.2273	9.42854	5.26578	2.92545	0.587969	2.76906	4.757	5.40608	6.28372	2.83854	7.23393	2.11271
b0355	frmB S-formylglutathione hydrolase	0.594576	1.51283	0.806973	0.787095	3.88078	0.676017	1.71997	1.00383	1.12251	1.30245	2.59266	1.39056	1.41741	0.709473	2.49448	2.05931	1.77903	1.10174	1.10243	1.3339	0.418614	0.738039	0.434486	0.927762	1.43022	0.262832	2.22781	3.48378	2.00388	1.74037	1.88265	1.74784	1.2021	3.43508	0.242034	0.316043	1.61498	1.98463	0.744643	1.09228	0.777512	1.1985	1.3738	1.41715	1.9631	2.66078	1.05047	4.52104
b0358	yaiO outer membrane protein	5.4173	3.46234	4.04804	3.91109	4.65279	2.64962	3.02318	3.15245	2.88436	6.03864	0.798642	4.15433	2.47381	2.60867	4.29198	3.07603	4.33759	3.58417	3.39464	6.28755	2.99907	3.16611	3.63553	1.15965	2.70029	1.80952	5.26436	7.65107	3.54756	3.53814	3.66577	5.51649	4.67009	4.19032	3.83026	3.85167	2.82201	3.69795	3.595	4.80662	2.44633	5.20551	3.54794	2.91424	2.43056	6.17271	4.99279	6.04102
b0359	yaiX predicted acyl transferase (pseudogene)	2.38859	3.00211	2.6074	2.73344	4.13772	3.03851	3.16108	2.74721	1.83338	2.79328	2.94252	2.44481	2.69116	2.2997	4.19171	2.26319	4.24328	2.99579	2.64358	2.89325	4.98957	3.97275	3.6909	1.98817	3.97404	3.98754	3.12676	2.59619	2.44846	2.8494	2.10293	3.29981	3.63421	3.56559	0.625661	0.93756	2.6583	2.21053	2.81416	2.83746	2.60342	2.35449	3.16804	2.4785	2.0553	2.73362	2.89839	5.81653
b0360	insC-1 IS2 element protein InsA	3.80929	4.19352	4.77761	4.25208	5.06458	4.46818	2.47616	3.11657	3.04341	3.61307	3.91795	3.48079	0.746343	0.92975	4.1277	2.15532	4.00829	4.70464	4.30685	5.15196	6.64349	5.52092	4.28922	4.45593	7.44957	3.7886	4.06853	4.35589	3.52013	4.52101	4.34891	3.92722	4.52443	2.7678	3.63292	2.97652	3.89886	3.96826	3.58402	5.27194	5.65453	4.37079	4.39515	3.03073	3.75621	6.14876	4.99193	6.52216
b0361	insD-1 IS2 element protein	1.63407	1.82093	1.88047	1.68989	1.29935	1.59023	1.44997	1.5213	1.05798	1.81804	2.33905	1.73102	0.49487	0.650047	1.84868	2.23696	1.86983	2.15107	2.23489	1.87043	1.93937	2.14305	1.04172	1.37014	2.70895	1.23992	1.98023	1.73133	1.8573	1.77339	1.94465	1.64089	2.00457	1.69793	1.15315	1.24917	1.2597	1.77375	1.17912	1.97166	1.96108	1.82374	1.40512	1.93032	1.33217	2.79286	1.16697	1.95152
b0362	yaiF predicted protein	3.29004	3.26703	3.08189	3.56933	5.99967	4.76737	4.58456	2.74101	2.82487	1.72421	4.09067	1.75024	2.10656	0.725702	4.1106	6.27567	5.29419	3.80666	3.50612	4.15068	3.79185	3.28807	4.07807	1.56311	6.20855	2.89224	4.21797	3.14622	3.45408	3.00084	2.32524	3.63935	6.29991	3.80072	1.60992	1.90834	3.04661	2.01794	4.60838	2.99113	5.5973	2.92776	3.77048	3.85398	2.08608	4.55547	3.84046	5.75686
b0363	yaiP predicted glucosyltransferase	3.18104	3.40893	2.48551	3.25578	3.19823	1.94637	3.94767	2.7386	2.91842	2.85434	1.96821	2.81577	0.966903	1.0375	4.30398	3.44784	3.99714	2.66076	3.48028	3.44061	2.42027	2.80331	3.8158	0.527533	2.98562	2.98917	3.06127	2.83176	3.33344	3.27169	4.12005	3.06481	2.76826	2.1895	3.11099	5.67754	3.8708	4.38838	3.52901	3.57299	3.71975	4.16407	4.89252	3.14237	4.35981	3.0348	2.71847	4.25394
b0364	yaiS conserved protein	2.57815	3.10084	3.44787	3.06123	5.18212	4.03628	3.86457	2.54354	3.28532	1.91966	2.52821	2.14102	2.20544	1.07872	5.92173	2.32806	5.34111	3.50022	2.33447	4.0871	3.87081	2.83352	3.00043	4.44673	4.01987	4.363	2.84223	3.02351	3.69126	4.27368	3.3128	3.35749	3.6105	2.6748	11.3378	7.6802	4.90702	3.45048	4.58615	2.68255	1.41991	3.26821	3.58192	4.41384	3.30146	2.76502	3.68244	5.077
b0365	tauA taurine ABC transporter	1.20218	1.05992	1.33895	1.10369	0.541031	1.01436	1.05679	0.887604	0.687933	0.678004	1.29924	0.957279	LQ	0.582234	0.981946	0.422338	0.593497	1.19439	1.30207	1.05821	0.786482	0.87026	1.15949	1.40672	2.53279	0.776177	1.15727	0.75285	0.951433	1.60015	1.80441	1.2601	1.28013	1.11859	0.240399	0.337498	0.867733	0.644717	1.37177	1.71722	0.686025	1.62037	0.701181	1.32425	0.201268	0.751009	0.879181	1.75406
b0366	tauB taurine ABC transporter	0.760946	0.795373	0.218335	0.546999	0.176662	0.392874	1.06837	0.473989	0.606983	0.391048	0.271916	0.408408	0.272615	0.62069	0.518427	0.220864	0.560663	0.611747	0.493482	0.324744	0.283882	0.337252	0.686103	0.121433	0.203302	1.27917	0.761572	0.236348	0.926348	0.487865	0.496693	0.619788	2.43238	0.411904	0.108407	0.138854	0.433943	0.154001	1.56289	0.89572	0.155464	1.04087	0.296016	1.05053	0.0855768	1.42225	0.200148	0.474149
b0367	tauC taurine ABC transporter	0.361895	0.375248	0.451165	0.787645	0.19502	0.33086	0.264121	0.400229	0.331924	0.294877	0.431649	0.484	0.21462	0.502964	0.538353	0.497634	0.44301	0.565375	0.641371	0.491792	0.260342	0.380959	0.458433	0.079875	0.179454	0.252351	0.634398	0.124205	0.499964	0.426866	0.436821	0.433547	0.982614	0.595184	0.254282	0.272657	0.357374	0.292673	0.266823	0.551353	0.127815	0.442529	0.106263	0.452381	0.128012	0.254278	0.2358	0.56247
b0368	tauD taurine dioxygenase	1.35118	0.8252	0.91497	0.657657	0.665807	LQ	1.05144	1.39063	0.827594	0.433634	1.74472	1.35752	0.250487	1.29173	1.14069	LQ	0.761678	LQ	0.722415	1.01079	1.84545	2.56333	0.649897	0.152518	0.624559	0.803857	LQ	0.359478	LQ	0.815229	1.08775	0.659442	1.80572	LQ	0.0755696	0.315706	1.26865	1.02083	0.819772	0.869878	0.339483	LQ	0.851975	1.32593	0.193699	0.186524	LQ	0.929157
b0369	hemB porphobilinogen synthase	1.84803	1.14486	1.33687	0.951372	1.41312	1.71365	0.880979	1.77432	0.923335	0.86709	1.0053	LQ	0.749231	0.532766	1.01763	3.57479	1.1027	0.935559	1.07708	0.83636	1.66893	1.79901	0.925612	0.599156	0.856666	0.953556	1.0896	1.44732	1.31927	1.61555	1.55456	0.959291	1.15029	1.07607	0.941801	1.15837	1.03084	4.15386	1.10148	1.21975	1.11752	1.03633	1.90747	1.60973	1.09112	0.710472	2.69118	0.995903
b0370	b0370	2.61192	1.98105	2.16557	2.46718	3.22673	2.79239	0.87568	1.46086	2.38838	1.16545	1.25555	LQ	1.27042	1.18323	8.87247	1.64853	5.1956	1.58636	1.75614	2.4562	1.81344	2.19373	2.05843	1.29538	1.74652	2.77135	1.36463	2.11756	1.53749	1.72212	2.37189	2.49711	2.21445	1.482	2.14935	LQ	3.3473	2.30403	2.68911	1.88725	2.05026	1.66298	2.22405	1.60097	2.06029	0.79078	3.28124	2.035
b0371	yaiT conserved protein	11.2921	8.2733	9.383	12.7671	21.8399	12.5712	4.23814	3.93075	8.56746	8.00067	6.20647	13.9503	4.78325	1.73801	10.962	3.49404	11.3115	7.93386	7.32343	6.35827	9.88057	8.33016	3.82591	11.7586	14.5473	17.6334	7.33542	16.5038	9.70655	11.8053	10.3424	22.0927	9.04075	2.72803	33.1618	28.1582	16.0725	14.1019	12.8376	16.5152	18.8997	4.37389	16.5347	6.88933	26.6008	6.48817	29.2796	11.2892
b0373	insE-2 IS3 element protein InsE	2.40296	1.94585	2.38199	1.68512	2.99988	2.58637	1.32151	0.749326	1.16903	0.844724	1.26246	0.992683	0.775166	0.559871	1.44204	2.17348	1.47841	1.46119	1.08351	1.27817	2.94212	1.79296	3.13024	3.96387	1.35588	2.44815	1.08417	2.28226	1.43248	2.1572	1.77843	1.3166	1.43732	1.22164	0.448999	0.573651	2.69674	1.86904	1.35379	1.84171	2.66587	1.67432	2.79871	2.04425	0.589713	0.950562	1.31291	2.08578
b0375	yaiV predicted DNA-binding transcriptional regulator	6.47533	5.12937	5.95677	5.19402	8.26995	7.19793	1.85319	3.01147	2.19063	1.9675	2.07117	3.63782	0.860636	0.711098	2.71075	5.82404	2.36361	2.74365	2.63725	2.28213	8.20348	7.09397	3.62054	7.10245	2.90505	9.54713	2.68047	5.93628	3.04974	6.25464	5.97479	2.3861	2.78833	6.34063	6.9907	4.73716	4.13655	8.6574	3.17486	4.83078	2.90668	3.71867	8.8156	4.90465	3.06157	1.69586	7.9341	2.35937
b0376	ampH penicillin-binding protein	1.54526	1.80389	1.80196	2.55456	0.662231	1.21586	0.816228	1.56736	1.42265	1.54031	0.613257	1.39152	0.609216	0.732414	1.18565	0.651507	1.67989	1.48193	1.70793	1.12505	0.969014	1.19319	1.1717	0.807712	1.55815	1.20744	2.07844	1.87814	1.47824	1.24629	1.59636	1.95905	1.06436	1.8189	0.533113	0.743142	1.15795	1.3191	2.4064	1.51416	3.39243	1.86833	1.97706	2.17298	0.533746	1.8011	0.665342	2.72138
b0377	sbmA predicted transporter	0.552651	1.5747	1.22404	1.71168	1.55276	0.992606	1.098	2.09113	1.5101	1.72765	12.573	6.34011	0.408414	0.565264	2.93912	1.32618	1.72701	2.18396	2.34505	1.21817	0.855895	1.21179	1.71702	1.24068	1.21737	0.321383	1.54833	0.562423	1.67343	1.63044	1.77157	0.816663	1.83456	2.33584	0.123103	0.124033	1.12661	0.644892	0.56291	1.69347	44.9825	58.9163	0.744814	0.600493	0.11667	0.782563	1.38474	2.66998
b0378	yaiW predicted DNA-binding transcriptional regulator	0.362106	0.787583	0.760476	1.07227	0.279912	0.41681	0.306013	0.94929	0.485455	0.719894	0.775299	0.753068	0.303022	0.586915	0.764952	0.813412	0.865651	0.570636	0.617255	1.12811	0.380154	0.445061	0.669631	0.256956	1.16358	0.244414	0.839028	0.395561	0.832947	0.861444	0.820728	0.563547	2.5107	0.788131	0.644461	0.636503	0.743139	0.481172	1.18715	0.764592	10.6964	5.90429	0.510812	0.796434	0.225983	0.781519	0.995796	0.946446
b0380	yaiZ predicted inner membrane protein	1.29288	0.718896	1.04265	0.721474	0.439423	0.671508	0.368727	0.643863	0.587223	LQ	0.447758	LQ	0.483445	0.65222	0.366031	1.18706	0.573643	0.687201	0.725969	0.564083	0.833952	0.837032	0.978403	0.950575	0.333014	1.04192	0.816605	1.23768	0.988253	0.671823	0.708068	0.756372	0.814289	0.918434	0.428257	0.502666	0.861698	0.724594	0.524212	0.92928	3.44715	1.1912	0.43082	0.972209	1.37251	0.351248	1.69704	1.53915
b0381	ddlA D-alanine-D-alanine ligase A	1.84823	1.12491	1.67774	1.84327	1.90947	0.826629	0.832851	1.75205	1.22762	0.934392	0.370198	1.47195	1.01356	0.691478	1.08021	1.87921	1.24249	1.1752	1.13754	0.992442	0.960355	0.873852	0.620608	2.04045	2.08073	1.06486	1.24344	0.917543	1.57166	1.6242	1.63713	1.66726	0.512681	0.574924	0.555165	0.56599	1.49673	1.27514	1.45047	1.5707	0.528832	1.3105	1.27946	1.46347	1.99956	1.34424	1.77478	2.72306
b0382	iraP anti-adaptor protein for sigma; S stabilization	2.42057	2.04511	2.11057	2.55623	4.35791	3.75101	6.71839	2.82848	2.8511	1.73746	5.23424	LQ	1.86404	1.03969	4.85387	3.65216	5.53537	2.18464	1.92997	2.96782	2.648	2.58985	3.00799	1.35983	4.20473	3.06886	2.3503	2.04112	3.5935	2.85028	2.84124	7.50373	4.49225	1.99954	5.33789	4.11431	6.57948	2.91647	4.60947	2.2819	1.24455	4.22086	3.49036	3.36948	6.5023	2.39528	3.53341	7.51959
b0383	phoA alkaline phosphatase	1.8107	1.28175	1.01533	1.9073	1.23378	1.36147	1.36462	1.09739	1.12688	1.37823	2.14653	1.40601	0.917089	1.30934	1.54309	1.12831	1.8037	1.71946	1.76496	1.19667	1.66661	1.6077	1.53793	0.728201	1.76433	0.988323	1.68544	2.38707	1.54358	0.965752	1.2735	1.77685	1.38424	2.12196	1.04465	1.01019	1.46404	1.76121	1.20246	1.60587	1.18417	1.01754	2.28287	0.942035	0.552231	1.966	1.19957	2.92755
b0384	psiF conserved protein	1.09858	1.09864	0.42773	0.577256	2.62051	1.17956	0.394267	0.695361	0.938496	0.61534	0.524243	0.786093	0.628963	1.37583	0.730424	1.04067	1.1471	1.40223	1.27041	0.432811	4.8714	3.76983	0.52685	1.54535	0.371011	0.915515	0.906433	1.42499	1.35014	1.26361	1.0629	1.17167	0.659326	0.814048	0.242586	0.300899	1.30079	1.00984	1.57711	0.691074	1.77706	0.653799	0.327012	1.7268	5.57956	0.799102	0.370918	0.482051
b0385	adrA predicted diguanylate cyclase	0.564404	0.636665	0.889125	0.755283	1.18188	0.768625	0.254892	0.420269	0.50323	1.04022	0.601758	0.888254	0.387941	0.473641	0.721198	0.404322	0.272787	0.750857	0.696149	0.273154	1.23226	1.16945	0.256451	0.192628	0.417885	1.09754	0.526686	1.01289	0.472562	0.867494	0.92161	0.671969	0.811156	0.586041	0.119519	0.182487	0.561868	0.235814	0.568285	0.414315	0.489308	0.591069	0.1812	0.463602	0.67249	0.376463	0.903514	0.464233
b0386	proC pyrroline-5-carboxylate-reductase	0.409771	0.594967	0.371181	0.540403	0.206066	0.575261	0.629581	0.448594	0.414875	0.515478	0.216797	0.30093	0.349117	0.479508	0.604092	0.423567	0.557424	0.559649	0.577405	0.513449	0.580788	0.870603	0.342302	0.509727	0.141698	0.348893	0.889612	0.734443	1.1849	0.662301	0.724554	1.06517	1.04356	1.30962	0.463581	0.611828	0.268226	0.227407	0.51951	0.50634	0.148132	1.01091	0.403248	0.528959	1.1114	1.08609	0.235527	1.50998
b0387	yaiI conserved protein	0.268195	0.654397	0.429561	0.311904	0.211278	0.202942	0.461014	0.576935	0.382489	0.530198	0.153016	0.310859	0.443918	0.37212	0.672778	1.28384	0.428509	0.309123	0.345026	0.630816	0.379254	0.578666	0.616922	0.236947	0.151181	0.358075	0.518595	0.517145	0.717933	0.324926	0.459226	0.607508	0.362259	0.59683	0.222137	0.378575	0.31033	0.276983	0.853666	0.384344	0.157097	0.442217	0.38717	0.446404	0.379709	0.444753	0.208149	0.95538
b0388	aroL shikimate kinase II	0.379872	0.675977	1.33269	0.540702	0.328755	0.506542	0.626109	2.02403	0.636282	0.529553	0.350778	0.459785	0.440342	0.482793	0.827998	0.828054	0.574242	0.353686	0.3563	0.419742	0.77429	1.05805	0.498467	0.269613	0.70981	0.738699	0.74588	0.888065	1.41526	1.14802	1.20357	0.503258	0.542291	0.664307	0.223197	0.324211	0.582442	0.625661	0.607335	0.827778	0.246481	0.638745	0.237103	0.670792	0.460331	0.926169	0.403351	1.33118
b0389	yaiA predicted protein	1.04346	1.01481	0.994249	1.17797	0.768061	1.13366	0.752895	1.07114	0.742703	0.883371	0.544472	LQ	1.24698	0.915822	0.940813	1.27889	0.835071	0.718815	0.852329	0.687624	3.44378	2.30006	1.01529	0.611885	0.530205	0.756969	1.06211	2.64041	1.26397	1.19988	1.07984	1.2005	1.42969	1.31031	0.490843	0.59132	1.2072	1.18381	0.909202	1.23975	0.587861	1.35773	0.627776	0.979623	0.87584	0.590608	1.4067	1.7429
b0390	aroM conserved protein	1.23034	1.42056	2.00158	2.18103	2.28517	1.75407	0.389698	0.677993	0.773868	0.908511	1.20937	0.888763	0.81905	0.399276	1.23594	0.570618	1.48914	0.824386	0.71553	1.80711	0.388124	0.584403	0.911296	0.929078	0.382689	1.1613	1.14784	1.92668	0.404891	1.48316	1.31509	1.39192	1.03344	2.22931	0.316757	0.505932	1.02434	1.46157	1.45145	0.985193	1.02945	1.71716	0.65497	0.558338	0.400048	0.630838	1.12951	1.85953
b0391	yaiE conserved protein	1.01155	1.49444	1.94087	1.35229	1.07149	1.82925	0.978172	1.45437	1.50349	1.4771	4.18512	2.29163	1.23383	0.920918	1.74654	3.81012	2.18555	2.15414	2.05679	2.60695	0.649382	0.899829	2.3882	0.691191	1.76979	1.02271	2.1704	1.53804	1.23796	1.32846	1.51872	1.88122	1.65519	1.90035	1.99951	LQ	1.03963	0.951248	0.747647	1.62433	1.79102	2.16228	0.952552	2.40449	1.7478	1.2106	1.5081	4.29925
b0392	ykiA predicted protein	2.41345	3.03017	3.06106	3.00626	2.45426	2.43891	6.50771	1.01594	2.0568	1.91966	4.66935	3.09526	3.55821	1.66005	4.22974	0.989167	4.55239	2.25872	1.67506	6.4166	0.844345	0.904733	2.2596	2.04888	6.0153	2.18127	2.71704	1.95276	2.07158	2.60925	1.95847	3.29542	2.69833	4.36695	2.87179	1.95247	2.62359	1.66232	1.68454	2.94363	1.8927	5.12831	2.46019	2.65307	1.4933	6.78199	1.75757	9.00386
b0393	rdgC nonspecific DNA binding protein; nucleoid component	0.758395	1.22346	1.41581	0.815299	0.763551	0.661495	0.639472	0.597282	0.806737	0.808989	0.412705	0.678622	0.620409	0.853104	1.13867	2.11085	1.16732	1.00705	1.06913	0.535862	0.445201	0.586377	0.90637	0.329632	0.618673	0.495367	0.985248	0.641459	0.900549	1.18797	1.18177	0.858005	1.13575	0.865576	0.702699	1.02364	0.639673	0.684838	0.64132	1.13573	1.02391	0.955567	0.59269	1.55374	0.474864	0.959346	0.609824	1.9307
b0394	mak manno(fructo)kinase	1.17263	1.03308	1.31258	1.28498	0.778008	0.357287	1.14209	1.00393	0.658202	0.61392	1.25617	0.911219	0.416198	1.08527	1.28987	1.30219	1.28758	1.3672	1.67233	0.769873	0.589115	0.731348	0.503466	0.298645	0.778677	0.467278	1.42304	0.865991	1.57283	0.818907	1.07766	1.33922	0.968633	0.841025	1.65539	2.15692	0.998547	1.11252	1.68221	1.17182	0.519593	1.64276	1.44874	1.80638	0.310608	1.03167	1.43497	3.43366
b0395	b0395	0.903462	1.01606	0.936436	1.34182	0.704857	0.764615	1.36485	0.968782	0.948831	1.32892	0.821184	1.11565	0.906411	1.15057	1.14913	1.47605	1.03184	0.982324	0.894791	0.867734	0.710736	0.81922	1.06467	0.890543	0.974374	0.754272	1.36583	0.927939	1.29219	0.840538	0.944997	0.760964	1.2359	1.16647	0.625331	0.699985	0.588261	0.86159	0.767362	0.935703	0.661853	1.32937	0.722139	1.17359	0.662641	0.846648	0.843838	1.06716
b0396	araJ AraJ MFS transporter	3.30317	5.23952	3.49254	3.71663	3.35067	2.44006	3.74814	3.43446	2.47981	2.90088	2.19329	3.37234	1.23279	0.962441	3.79764	8.04891	4.44057	3.46862	3.39441	3.39928	1.86033	1.72942	3.79656	6.56425	2.76363	2.44593	4.29554	2.98374	4.75568	2.22386	2.51758	1.86807	3.13832	4.0304	1.23139	1.06436	2.37058	2.84573	2.37007	2.78547	4.56229	3.24839	3.62343	3.90778	1.51436	4.27234	2.35125	4.95176
b0397	sbcC ATP-dependent dsDNA exonuclease	1.04366	1.08524	0.589413	0.901383	1.48112	0.699349	0.88932	0.73627	0.983418	0.562683	1.15415	0.951343	0.395646	1.06224	0.933072	1.11917	0.701111	0.765191	0.740752	0.673723	0.633857	0.656114	1.20089	0.382281	0.489565	0.461735	0.901718	0.704875	1.14162	0.782014	0.706707	0.954649	1.30555	0.857697	0.242907	0.232591	0.955234	1.68817	1.824	0.787321	0.305901	0.99112	0.341261	1.43327	0.281625	0.907304	0.336413	0.745966
b0398	sbcD ATP-dependent dsDNA exonuclease	0.670814	1.53781	0.522451	1.2002	0.805989	1.17893	1.68059	1.3837	1.08625	0.837038	2.98037	1.17581	1.49566	0.454764	1.24462	0.477045	0.810206	0.955026	1.02434	1.52422	0.144316	0.208827	0.708824	0.249045	0.478893	0.770569	1.18411	0.607638	0.757385	0.815987	0.887576	0.79045	0.46937	1.32672	1.32385	1.52888	0.959923	0.749623	0.741275	0.82657	0.609035	1.30462	1.18386	0.808142	0.142262	0.690397	0.610043	0.648823
b0399	phoB PhoB-Phosphorylated transcriptional dual regulator	0.478898	0.925605	0.776631	0.796908	0.383233	0.869144	0.974033	1.45844	0.925908	0.68948	1.11286	0.799772	0.859528	0.494098	0.989958	1.06289	1.05482	0.726236	0.674314	1.08215	0.181893	0.21043	0.760209	0.143209	1.07933	0.495145	1.31328	0.407124	0.604864	0.390889	0.448534	0.709215	0.508801	0.704811	0.188472	0.206	0.692229	0.373971	0.70832	0.680541	0.545039	1.87526	0.487286	0.502282	0.129865	1.75635	0.268167	0.492158
b0400	phoR PhoR-P his	0.791561	0.929275	0.712765	0.224257	0.245016	0.329928	0.285885	0.420638	0.425496	0.326221	0.375206	0.647064	0.357857	0.378497	0.676953	1.00759	0.685631	0.426966	0.406822	0.683901	0.684355	0.618217	0.317382	0.623377	0.863709	0.988962	0.863572	0.488912	0.335495	0.303553	0.34985	0.770373	0.69712	1.42924	0.657037	0.522287	0.434872	0.971973	0.611902	0.67407	0.217601	0.650252	0.22535	0.538505	0.130857	0.714759	0.319702	0.410317
b0401	brnQ BrnQ branched chain amino acid LIVCS transporter	1.36415	0.973921	1.08994	0.708933	0.553099	0.332443	0.409804	0.811968	0.790335	0.602974	4.21961	1.4337	0.873075	0.407616	0.503019	0.318913	0.362947	0.630806	0.660188	0.453338	0.156431	0.215008	0.306473	0.162704	2.21217	0.246808	0.949896	1.35796	2.71531	1.17248	1.47846	1.26348	1.31781	0.334596	1.30605	1.42792	1.08503	0.239534	1.10622	0.468599	0.179813	1.47705	0.536257	0.457521	0.553619	1.40238	0.29855	0.675759
b0402	proY ProY cryptic proline APC transporter	2.05492	1.10395	1.1029	0.61056	0.660228	1.26437	0.444293	0.82871	1.01815	0.873583	1.27448	0.728847	1.37927	1.45406	0.675375	1.29381	1.43541	1.45146	1.52223	1.60544	1.39177	1.32935	3.15566	0.507971	2.62368	0.436079	1.75632	1.49092	1.93917	1.82582	1.92165	1.7012	1.53174	0.641353	0.745976	0.799616	1.13476	0.541285	0.23823	2.19023	0.314978	1.29876	1.14382	1.20885	2.57763	1.74396	0.761134	1.7714
b0403	malZ maltodextrin glucosidase	1.00518	1.55139	0.917529	1.50662	0.405173	0.69954	0.810377	1.37999	LQ	1.07136	0.603419	LQ	LQ	2.56548	1.39023	0.7616	1.3189	1.02192	1.13904	0.898334	0.751179	0.83667	1.37774	0.137501	0.798116	0.847664	1.31714	0.958106	1.97626	0.989806	1.18051	LQ	0.673626	0.553681	0.250183	0.340118	1.75224	1.69661	1.502	1.45211	0.20454	1.62081	1.43715	0.934396	0.094245	1.05265	1.61123	0.68542
b0405	queA S-adenosylmethionine:tRNA ribosyltransferase-isomerase	0.293393	0.873758	0.603454	0.536752	0.340104	0.414181	1.3853	0.773995	0.507247	1.0926	0.255426	0.790269	0.449843	1.08707	0.565448	0.438425	0.374835	0.537105	0.579336	0.341879	0.292171	0.293294	0.707502	0.901202	1.03634	0.544121	0.981978	0.723368	0.4316	0.422815	0.436133	0.372948	0.271929	0.690668	0.109025	0.133909	0.439519	0.997156	0.393462	0.769249	0.133318	0.474969	0.333907	0.696043	0.157265	0.447632	0.195068	0.290802
b0407	yajC Sec Protein Secretion Complex	0.279299	0.604187	0.459659	0.439812	0.305673	0.349227	0.53951	0.361806	0.599313	0.523885	0.367868	0.287821	0.614886	0.500677	0.374876	0.54378	0.314075	0.433931	0.435363	0.538424	0.250122	0.419552	0.523854	4.72962	0.24918	0.33501	0.412411	0.414468	0.446079	0.282891	0.391367	0.3822	0.537934	0.531355	0.238276	0.286394	0.429642	0.352891	0.310561	0.400807	0.245428	0.573603	0.3092	0.442843	0.302274	0.574847	0.384384	0.43142
b0408	secD Sec Protein Secretion Complex	0.133015	0.195525	0.138577	0.19027	0.101784	0.125392	0.0924161	0.536233	0.178966	0.19552	0.144858	0.167706	0.0925855	0.253037	0.143651	0.239974	0.118186	0.269919	0.241047	0.127684	0.170231	0.172722	0.216287	0.632326	0.0738066	0.106744	0.242483	0.311671	0.215611	0.189107	0.154715	0.104158	0.247506	0.254693	0.135575	0.0802726	0.0799039	0.142936	0.044405	0.150465	0.0803915	0.291451	0.0908445	0.236332	0.296267	0.114408	0.169309	0.134169
b0409	secF Sec Protein Secretion Complex	0.180965	0.163444	0.223151	0.308568	0.143753	0.160557	0.186797	0.945403	0.216371	0.31677	0.25353	0.317984	0.180375	0.424307	0.251325	0.395691	0.259987	0.334228	0.2733	0.15288	0.172084	0.17025	0.221397	0.57215	0.095324	0.118395	0.369918	0.156548	0.334734	0.177522	0.160288	0.298544	0.259351	0.384862	0.141856	0.115962	0.133286	0.155474	0.074398	0.444405	0.0902922	0.33797	0.0918306	0.274743	0.140397	0.149438	0.198966	0.315947
b0411	tsx nucleoside channel; receptor of phage T6 and colicin K	0.551619	1.3892	2.16502	1.11528	1.81536	2.63874	2.18396	1.16899	1.16298	1.72351	0.712989	1.89622	2.54692	2.63967	1.10945	2.59919	0.599774	1.24901	1.07203	1.08294	2.37878	2.13056	0.583245	0.814393	0.971119	0.746662	1.15493	0.634855	1.94296	1.68244	1.5456	0.956022	1.52033	2.3987	1.62432	1.60047	2.18794	0.820371	1.04138	1.08281	0.916993	2.08553	0.91562	1.56044	2.85016	0.589291	0.91046	1.92907
b0412	yajI predicted lipoprotein	0.983874	0.669392	0.922567	0.70826	0.242185	1.4324	0.703671	2.9412	1.18816	1.60231	1.10842	1.60598	1.63783	1.64762	0.834591	0.757631	0.860059	1.00183	0.805445	0.432635	0.471604	0.528229	1.05025	1.53019	3.075	1.37578	1.08452	0.60342	0.93793	0.871497	0.748077	1.06765	1.59045	0.72455	4.33705	4.00974	0.539301	0.823921	0.684706	0.481448	0.196651	1.22589	1.1941	0.400905	2.5462	0.504754	1.35153	0.553349
b0413	nrdR DNA-binding transcriptional regulator	0.317549	0.519769	0.777716	0.427983	0.225806	1.15814	5.24201	9.18687	2.67675	3.53782	5.10816	4.22364	2.25313	3.71203	0.335259	0.55971	0.284245	0.664529	0.632886	0.283837	2.15236	1.96554	0.675976	1.88222	1.02219	0.358923	0.493061	0.305832	0.672861	0.573324	0.594128	0.439123	0.709091	0.568413	0.213295	0.366893	0.508067	0.463587	0.247298	0.523895	0.49581	0.772983	0.361746	0.583067	0.344287	0.946389	0.388452	0.559993
b0414	ribD fused diaminohydroxyphosphoribosylaminopyrimidine deaminase / 5-amino-6-(5-phosphoribosylamino)uracil reductase	0.148002	0.216755	0.189071	0.186753	0.203974	0.124654	0.894815	1.44093	0.435552	0.700254	0.273623	0.532468	0.648051	1.41336	0.139834	0.339877	0.127624	0.245792	0.239065	0.100723	0.336742	0.434785	0.274883	0.123042	0.11486	0.107468	0.247166	0.102928	0.281698	0.294304	0.32316	0.166808	0.298155	0.325114	0.0916828	0.102372	0.105355	0.166024	0.238519	0.128129	0.091934	0.350747	0.0957816	0.271586	0.114176	0.157903	0.19738	0.124599
b0415	ribE 6,7-dimethyl-8-ribityllumazine synthase	0.215537	0.245269	0.214192	0.248661	0.178849	0.17587	0.277194	0.424994	0.236276	0.317825	0.380866	0.661776	0.323116	0.680176	0.199445	0.394784	0.206611	0.349609	0.324947	0.169586	0.335382	0.371873	0.344518	0.171172	0.166008	0.151108	0.319852	0.145426	0.347873	0.321363	0.321103	0.186002	0.376089	0.416978	0.136595	0.141984	0.115497	0.229602	0.134446	0.185662	0.148073	0.414437	0.131836	0.292621	0.175852	0.184778	0.250329	0.180716
b0416	nusB transcription antitermination protein NusB	0.177765	0.222519	0.220154	0.284458	0.170175	0.202731	0.524511	1.21385	0.51984	0.474951	0.828951	0.419591	0.48481	0.734436	0.274504	0.487234	0.272475	0.304383	0.37184	0.326624	0.2264	0.315085	0.342435	0.208558	0.250822	0.256303	0.364251	0.244941	0.346843	0.195069	0.311368	0.389084	0.383248	0.4243	0.122025	0.185588	0.238369	0.246193	0.227581	0.251236	0.206035	0.49772	0.20032	0.320101	0.208928	0.323396	0.225916	0.380901
b0417	thiL thiamine monophosphate kinase	0.211064	0.235814	0.22544	0.248219	0.0867361	0.114388	0.21652	1.52528	LQ	0.767703	6.82186	0.569515	LQ	0.430346	0.132601	0.773399	0.11159	0.301488	0.328402	0.245097	0.571061	0.480504	0.384024	0.461582	0.0751028	0.412692	0.4979	0.41596	0.621466	0.323679	0.315365	LQ	0.229099	0.312983	0.111902	0.0661902	LQ	0.356901	LQ	0.15085	0.194044	0.345247	0.0802244	0.415676	0.139726	0.101166	0.142352	0.494162
b0418	pgpA phosphatidylglycerophosphatase A	1.82288	0.93679	0.568503	0.450296	0.223348	0.373738	0.190364	0.457583	0.695289	1.17826	0.454798	0.37195	0.290332	1.45719	0.361105	0.878535	0.363477	1.32769	1.18426	0.744426	0.460669	0.589408	1.20631	0.713308	0.152024	2.77111	0.515728	0.993302	1.41959	1.52334	1.35938	0.668042	0.378785	0.724339	0.137179	0.202345	0.852707	0.521423	0.743075	0.249922	0.328183	1.32822	0.467355	0.290275	3.92054	0.234115	0.253375	1.66925
b0419	yajO putative NAD(P)H-dependent xylose reductase	0.357262	0.82883	0.873748	0.612747	0.249472	0.5271	0.559272	0.523478	0.804887	1.07776	0.536884	0.524601	0.714233	1.07274	0.975021	0.541339	1.20246	0.760474	0.767142	1.29035	0.699518	0.691489	2.28524	0.298011	0.273598	1.01026	0.790138	0.926294	0.609523	0.830577	0.802534	0.907073	0.629961	0.571656	1.09627	1.44738	0.707686	0.4614	0.773599	0.567316	0.417842	0.791295	0.912557	0.630279	0.728852	0.939971	0.423555	0.39144
b0421	ispA geranyl diphosphate synthase / farnesyl diphosphate synthase	0.204449	0.275827	0.247481	0.236033	0.137125	0.262741	1.8602	3.87891	1.22925	2.24242	4.38417	3.40372	0.592728	2.99919	0.202456	0.370332	0.145809	0.332425	0.335199	0.193298	0.31087	0.313448	0.401691	0.152223	0.50246	0.13443	0.407926	0.288442	0.352443	0.231652	0.251719	0.233945	0.366587	0.389021	0.124571	0.0944786	0.143538	0.234246	0.131422	0.248387	0.126662	0.501092	0.125227	0.304029	1.46313	0.172249	0.234492	0.341065
b0422	xseB exonuclease VII, small subunit	0.571363	0.71478	0.350636	0.461672	0.253551	0.320307	10.5776	10.9906	3.10013	3.40195	22.938	15.3176	4.53519	8.40699	0.999423	0.689049	0.404842	0.470005	0.48845	0.412494	0.36937	0.444851	8.90247	0.3466	1.57939	0.28417	0.723842	1.35203	1.76916	1.12681	1.27465	1.02901	0.607807	0.653284	0.281481	0.287148	0.794139	4.78105	1.53884	0.341725	0.27963	0.884202	0.294074	0.687084	0.352724	0.595847	0.398365	1.16284
b0423	thiI ThiI	0.683817	0.856537	0.717321	0.750999	0.645148	0.626119	0.776746	1.16161	0.917427	LQ	1.19389	LQ	0.722051	1.31071	0.727454	1.20194	0.674775	0.721225	0.760883	0.470092	0.726115	LQ	1.1187	0.504944	0.836822	0.583392	1.18193	0.639695	1.19531	0.882625	0.954202	0.538053	1.10683	1.38201	0.446369	0.497976	0.599906	0.86182	0.731124	0.668509	0.452243	1.61152	0.522817	1.22991	0.478146	0.791983	0.859294	1.14639
b0424	yajL conserved protein	0.754438	1.25102	0.877927	1.00342	0.789035	0.807512	0.869437	0.712134	1.12548	0.916539	0.274515	0.691854	0.588292	2.38157	0.936335	0.785687	0.678186	0.807351	0.75096	0.460173	0.617675	0.743702	1.7385	0.254542	2.0402	0.31268	1.11804	0.904078	0.929277	0.779166	0.879893	0.365841	0.648618	0.951092	0.2905	0.422647	0.529107	0.630289	1.2469	0.529239	0.171708	1.55378	0.389871	0.76561	0.215871	0.26829	0.39398	0.986468
b0425	panE 2-dehydropantoate reductase	0.539761	1.09227	2.1132	1.47614	0.937871	0.966917	2.29206	1.57183	3.90687	3.36618	1.03597	0.909513	6.03182	6.53621	0.993759	0.485358	0.324204	1.11667	0.963138	0.354964	3.1003	2.74567	2.26331	1.59202	1.41398	0.264762	1.33116	0.831362	1.33397	1.67706	1.59242	0.62702	0.3691	0.750154	4.53821	5.12168	1.4315	2.4135	4.39235	0.669778	0.419758	1.40937	0.556606	0.62925	0.290982	0.406127	0.343047	5.62714
b0426	yajQ nucleotide binding protein	0.734729	1.64845	2.93806	1.34916	0.302202	2.15763	2.13747	1.08933	1.90891	1.21148	0.473237	2.3696	2.21027	1.92237	1.0707	3.75719	0.913083	1.13167	0.992741	1.78595	0.693491	0.842948	0.54654	0.662946	0.294368	0.527005	0.863495	0.601905	2.74841	1.27589	1.15927	1.07723	1.23374	1.31919	0.2609	0.450919	1.47691	0.524305	1.02384	0.93433	2.11328	1.13797	2.68981	0.66744	0.33866	2.02554	1.60238	0.434287
b0427	yajR YajR MFS transporter	0.686582	1.20179	0.632837	1.01363	0.41919	0.425087	4.09789	5.20742	3.54185	2.90549	3.76272	2.10878	2.13144	7.43347	0.701292	0.714599	0.895062	1.41238	1.58063	1.26779	2.15494	2.42019	0.29585	0.557459	1.33966	0.327469	1.39024	0.511013	0.995698	0.629086	0.598713	1.52904	0.240877	0.826651	0.631699	0.743718	0.765303	0.925865	1.42855	0.573468	0.174375	2.12249	0.409241	1.12812	2.90651	2.41894	0.249271	0.262384
b0428	cyoE heme O synthase	0.953407	0.995786	0.956037	1.27637	0.256537	0.330685	40.5964	46.7722	27.2258	36.4585	69.5316	16.2466	35.5576	21.3723	0.476274	0.296327	0.537469	0.272995	0.231764	0.221323	0.368387	0.293444	0.333218	0.147104	0.114306	0.154156	0.572827	1.49807	0.616035	0.362999	0.355287	0.426358	0.238481	0.73623	0.175614	0.129954	0.498169	0.295905	0.554241	0.528029	1.09172	0.627442	0.301912	0.286041	0.143365	1.11331	0.174016	0.328251
b0429	cyoD cytochrome bo terminal oxidase subunit IV	0.806778	0.652806	0.415738	0.702844	0.541918	1.12005	14.4044	16.2575	10.3532	8.4393	23.9498	6.63334	34.4822	7.0506	0.348112	0.60009	0.432258	0.376575	0.518594	0.515904	0.405031	0.539118	0.498964	0.308179	0.349005	0.333131	0.777177	0.830333	0.728812	0.432355	LQ	0.47232	0.576151	0.589336	0.240356	LQ	0.907597	0.437663	0.470065	0.386572	0.741704	0.860035	1.27834	0.52864	0.330338	0.480114	0.316334	0.467947
b0430	cyoC cytochrome bo terminal oxidase subunit III	0.840336	0.38142	0.676603	1.1353	0.312621	0.332301	25.5572	38.3758	28.5509	35.2638	37.3143	8.24058	17.4936	24.958	0.207868	0.238676	0.22263	0.181497	0.162626	0.180716	0.17164	0.167248	0.209345	0.180924	0.16652	0.127358	0.546051	0.289306	0.912791	0.332991	0.367433	0.150391	0.298282	0.256364	0.102223	0.105212	0.442751	0.224778	0.541997	0.144079	0.921425	0.407475	0.218314	0.738511	0.158735	0.354006	0.151252	0.250112
b0431	cyoB cytochrome bo terminal oxidase subunit I	1.12785	0.763886	0.432701	1.44234	0.370543	0.33978	26.4814	49.2128	31.8359	32.2739	35.5792	15.426	33.1834	28.5166	0.136617	1.1005	0.0797614	0.365926	0.210178	0.13584	0.321359	0.328095	0.541094	0.934076	0.0672769	0.0958244	0.958335	0.855093	0.936559	1.09685	1.06096	0.268619	0.391885	0.474558	0.487633	0.526788	0.960671	0.937628	0.703423	0.226387	0.0898873	0.546468	0.249864	0.302963	0.401454	0.758429	0.172771	0.0989326
b0432	cyoA cytochrome bo terminal oxidase subunit II	1.01671	1.73731	1.13532	4.73202	2.94845	2.13379	82.2104	LQ	38.5378	LQ	151.826	LQ	63.4825	30.6951	1.64556	1.06438	1.38167	1.41053	1.43039	4.53384	1.952	1.93808	0.662821	0.207411	0.72302	0.560901	1.45305	1.41304	1.00893	1.04112	1.13116	1.36003	0.786747	0.752602	1.48195	1.72742	1.99195	1.97358	0.933503	1.08054	0.203272	1.68516	0.213439	0.513701	4.87214	1.56075	1.87272	0.474558
b0433	ampG AmpG muropeptide MFS transporter	0.529619	1.23182	1.64374	1.31614	0.870909	0.967532	1.24311	15.5244	8.15605	7.72308	0.717036	5.14918	0.994001	8.32931	0.195892	0.246114	0.147582	0.237591	0.250601	0.115701	0.274437	0.337214	0.28368	0.302167	2.00809	0.239713	0.930285	0.539614	0.575695	0.573606	0.503535	0.693525	0.903539	1.77725	0.253746	0.17182	0.665637	0.537026	1.04728	1.10698	0.169006	0.608181	0.665465	1.10955	0.18522	0.590815	0.148986	0.829343
b0435	bolA BolA transcriptional dual regulator	0.873917	0.867937	1.18285	0.658955	0.607575	1.13664	1.26139	0.567404	1.08575	0.942945	0.39778	0.931819	2.92481	1.78356	0.812913	0.824123	0.511215	0.565923	0.627622	0.758392	0.356676	0.543438	0.527807	0.344092	0.819846	0.876244	1.33068	0.438064	1.6727	1.4157	LQ	0.939709	1.70429	1.22742	0.316902	LQ	0.763849	0.547704	0.390387	1.02603	2.03184	1.58286	0.324866	0.768495	0.86574	0.455812	0.402731	1.03953
b0436	tig trigger factor; a molecular chaperone involved in cell division	0.654117	1.06527	0.846711	0.545717	0.388651	0.418485	0.218298	0.270596	0.294299	0.414767	0.234011	0.304267	0.387732	0.562566	0.26074	0.271947	0.238726	0.424454	0.30003	0.301347	0.286358	0.279944	0.365515	2.30092	0.14497	0.142191	0.931563	0.364902	0.559266	0.334971	0.31256	0.444852	0.429403	0.566105	0.124555	0.100153	0.689869	0.448895	0.580761	0.607201	0.470057	0.850337	0.507714	0.728857	0.185907	1.34454	0.202309	1.29419
b0439	lon DNA-binding, ATP-dependent protease La	0.255011	0.385366	0.363913	0.39823	0.271437	0.405956	0.291129	0.354628	0.340846	0.345746	0.417457	0.604074	0.442231	0.598794	0.773427	0.847216	1.57504	1.19912	1.03373	0.8723	0.605695	0.521663	0.477274	0.182077	0.192315	0.196578	0.640845	0.327869	0.508664	0.362604	0.318301	1.54785	2.47329	3.69043	2.522	2.72916	0.250166	0.295698	0.281519	0.244849	0.276395	0.65881	0.277949	0.513113	6.79617	0.323729	0.872344	0.2104
b0440	hupB Transcriptional dual regulator HU-beta;, NS1 (HU-1)	0.909132	1.13858	0.948226	1.07132	0.589878	1.30882	1.2937	0.604682	0.589778	0.747109	0.710146	0.784727	0.92404	1.88399	1.99836	1.6202	1.14005	1.11865	1.04588	1.48125	3.4031	3.07094	1.49956	0.390754	0.338017	0.658907	1.13097	0.860128	1.35712	1.92082	1.54069	0.742582	0.783684	1.07753	0.314039	0.406191	1.19206	2.65348	1.58728	0.945406	0.365856	0.840945	0.374049	1.23802	0.611299	0.920511	0.859818	0.417243
b0442	ybaV conserved protein	0.895813	0.89358	0.434888	1.30956	0.318367	0.453845	0.77189	0.592745	0.918792	1.17768	0.349901	0.453594	0.726448	1.00877	1.16703	1.70852	0.815647	1.03434	1.03104	1.82144	0.698519	0.81807	0.547642	2.12211	0.420915	0.54099	1.33822	0.5839	0.80498	0.822287	0.958024	0.584035	0.684763	0.728419	0.326211	0.411591	0.549689	1.0502	0.428292	0.85848	0.804889	2.11537	0.346169	0.771299	1.93897	1.64799	0.496699	2.87195
b0443	ybaW conserved protein	2.45407	2.61566	4.36776	0.871322	0.335834	0.903795	2.81654	0.96054	3.69837	1.30134	0.375646	2.28961	LQ	1.6597	1.71402	4.05144	2.39629	3.29959	2.81845	2.44754	5.62849	3.92378	1.12347	0.543373	0.308461	2.50885	1.94967	1.24364	1.49543	1.7679	1.44115	1.5706	2.81824	1.22921	4.62426	4.28019	1.91102	0.780927	3.03957	2.30242	4.09091	0.962819	2.67731	1.28848	4.97828	0.984017	2.4225	2.10945
b0444	queC enzyme in preQ 0 biosynthesis	1.31347	1.84611	2.00243	1.09016	0.486965	0.669699	1.33791	1.48165	1.2606	1.32684	1.87218	0.941465	1.18014	2.17699	1.3213	1.48243	1.81343	1.68997	1.88854	2.60013	0.965878	1.18693	2.47494	1.42338	0.99444	1.01704	1.75481	0.508712	1.65703	1.82141	2.01365	2.05509	3.01957	1.76459	0.332685	0.410471	0.795625	0.813611	0.936231	2.56793	2.80876	1.48586	2.0999	1.10996	2.96765	3.12149	0.444566	2.13732
b0446	cof pyridoxal phosphatase / HMP-PP hydrolase	0.485812	0.899148	1.46393	0.915054	1.54296	2.11493	0.878321	0.710555	0.835525	1.20612	0.408411	1.39526	0.914287	1.03858	0.887385	1.2383	1.02198	0.93126	0.922225	1.21743	0.408392	0.466525	1.86876	0.215645	1.33077	0.996882	1.09361	1.6401	1.15826	0.675463	0.72312	0.786162	1.44255	0.865102	0.503829	0.615599	0.644598	0.608128	0.364989	1.64859	0.318134	1.41085	3.66229	0.681783	1.17151	1.82292	0.36338	0.83117
b0447	ybaO putative LRP-like transcriptional regulator	0.683185	0.646387	0.669504	0.459683	0.252202	0.36403	0.684704	0.723849	0.752148	0.907793	0.229021	0.630569	0.982773	1.44039	1.08275	0.502813	1.05387	0.598809	0.579285	1.23093	0.703958	0.766853	0.964648	0.731691	0.901322	0.692073	1.14677	1.53383	0.632012	1.429	1.15889	0.659146	0.912136	0.410648	0.130513	0.146667	0.59283	0.64739	0.503362	0.886002	3.88286	0.580084	0.353582	0.535641	1.02271	0.521194	0.316878	1.02573
b0448	mdlA predicted multidrug transporter subunit of ABC superfamily: ATP-binding component	0.992963	0.952556	0.999128	1.18633	0.971147	0.39236	0.429703	0.435488	0.804933	0.857123	0.246392	0.869332	0.310388	1.13694	0.871121	1.09098	1.19173	0.942683	0.940039	0.863726	0.623904	0.587187	1.41323	1.14975	0.776755	0.968463	1.44429	1.16689	0.966345	1.01257	1.03913	0.980559	0.799678	0.736459	0.415697	0.453726	0.514708	0.381838	0.50705	1.04579	0.123518	0.675499	0.253217	0.732466	0.411747	1.14697	0.359274	1.35942
b0449	mdlB predicted multidrug transporter subunit of ABC superfamily: ATP-binding component	1.01762	0.892597	0.307459	0.766571	0.213989	0.608659	0.338624	1.05526	0.696512	0.503117	0.119979	0.223606	0.26791	0.930413	0.860669	1.02623	0.903153	0.715466	0.750565	1.20842	0.232811	0.240982	0.829812	2.74395	0.912346	0.435677	0.921467	1.58852	1.51449	0.82667	0.883209	0.327359	0.309543	0.333519	0.493876	0.446889	0.628677	0.590012	1.52992	0.528485	0.11693	0.332962	1.43367	0.53203	0.506841	1.27819	0.314106	0.944006
b0450	glnK uridylyl-[GlnK]	1.94759	1.25394	0.779741	2.68117	3.39558	1.05	0.439784	0.485122	1.39696	3.83932	0.272554	0.651213	1.19119	1.84111	1.89283	0.545464	1.69966	1.06539	1.02818	1.41979	1.6153	1.38923	0.573745	1.24132	2.90624	0.506472	2.36127	2.19274	2.06086	3.59638	2.90289	3.59779	0.541118	0.697443	0.238459	0.287584	0.92937	1.05836	1.22442	2.50201	1.30093	1.82155	3.36087	1.02382	0.266877	6.53188	0.656835	3.88914
b0451	amtB ammonium Amt transporter	0.414918	1.11023	0.786005	0.511732	0.316374	0.295984	0.661284	0.455815	0.625745	0.679051	0.457182	0.85762	0.407685	0.631898	0.893939	0.282488	0.87065	0.877861	1.00201	0.927141	0.175317	0.207947	0.348899	0.151546	0.424708	0.887763	1.4497	0.61116	1.62747	1.33397	1.33337	0.974045	1.17618	1.29185	0.186063	0.188641	0.464472	0.394329	0.52033	1.4499	0.209154	1.27621	0.653405	0.464767	0.342466	1.57632	0.453339	0.806153
b0452	tesB thioesterase II	0.473707	0.476494	0.408056	0.425944	0.263531	0.456548	1.51172	0.236642	0.399766	0.659411	0.391743	0.305867	0.731119	1.04566	1.01744	0.228632	0.94056	0.42331	0.372703	0.633414	0.330834	0.331765	0.3058	0.118618	0.626873	0.208549	0.661226	0.379765	0.753177	0.713857	0.804518	0.626419	0.337665	0.635492	0.0958327	0.112142	0.371119	0.151864	0.190767	0.794686	0.16803	0.668329	0.277274	0.561461	0.246618	0.826871	0.151274	0.699215
b0453	ybaY predicted outer membrane lipoprotein	0.330522	0.56667	0.635392	0.512813	0.298589	0.485562	0.548634	0.335884	0.420852	0.626975	0.26652	0.865571	0.439344	0.740216	0.719287	0.546281	0.524738	0.376649	0.344676	0.555549	0.34497	0.307917	0.890286	0.665387	0.478757	0.273421	0.776997	0.549376	0.50283	0.6132	0.601013	0.743945	0.602428	0.914672	0.258298	0.217969	0.37494	0.315054	0.194917	1.04229	0.298591	1.04028	0.341733	0.537477	0.315765	1.11591	0.329826	0.485864
b0454	atl alkyltransferase-like protein	0.313438	0.615405	1.14248	1.06411	0.904628	0.687491	0.824036	0.500649	0.557552	0.95007	0.268391	LQ	0.827743	1.14202	0.856039	1.72208	0.795965	0.449006	0.572009	0.430011	0.252682	0.424035	0.878162	0.26401	0.287996	0.319159	1.13279	0.524648	0.623811	0.594795	0.664929	0.459864	0.513097	1.311	0.199836	0.313758	0.707537	0.865722	0.344157	0.711887	0.202962	0.94112	0.513098	0.588541	0.240582	1.54458	0.39217	0.381678
b0457	ylaB conserved inner membrane protein	3.19207	3.04339	3.00537	2.68308	5.33261	3.08167	2.12064	1.70995	2.33562	2.46951	1.20324	3.35986	1.72801	1.56164	2.83716	1.94647	2.0451	2.44109	2.45534	2.79149	3.45516	3.46346	4.2768	3.61615	2.47284	3.31876	2.62884	4.25165	2.42389	3.34481	3.17813	3.35433	3.11805	4.27612	3.14472	3.45414	3.40579	3.27231	3.05375	2.86201	1.92012	2.06388	3.25842	3.13393	3.68882	2.83054	3.91361	2.72764
b0458	ylaC predicted inner membrane protein	3.4577	2.31893	3.1948	2.13637	2.86901	4.45417	0.652022	2.42089	1.76737	3.39957	0.674031	3.7528	3.36876	2.63834	2.07176	2.53539	1.6882	3.83929	3.71377	2.29459	7.58325	5.84029	1.34242	1.3936	4.46951	2.57628	4.52603	4.86896	6.42601	3.04196	2.41039	5.29334	4.99372	0.835647	21.2149	15.1575	3.26877	1.53677	3.18716	4.97709	2.77003	7.66227	3.05985	4.43664	3.98526	3.19167	5.15947	0.747485
b0462	acrB AcrB RND-type permease	1.59391	1.89323	2.07904	1.51707	2.66976	0.848993	1.16677	1.32013	0.939336	1.17781	0.274884	0.93444	0.798815	1.64313	0.437521	0.0935279	0.400677	0.314899	0.380489	0.229317	0.264509	0.341322	0.43477	0.0690856	0.244722	0.774818	0.6034	0.632797	0.134751	0.2303	0.27409	0.320116	0.0800629	0.151317	0.0613112	0.101368	0.320485	0.162594	0.254419	0.293995	0.873182	0.239038	0.56918	0.522551	0.441843	0.360374	0.0719325	0.513304
b0463	acrA AcrA Membrane Fusion Protein	1.43943	1.58786	0.958668	1.7065	0.75271	1.69301	1.88752	1.56761	1.14932	1.17084	0.439149	0.69523	0.455135	1.06044	0.745811	0.481901	0.724364	0.809528	0.827709	1.95487	3.19807	3.7435	2.10239	6.67567	2.68601	2.1344	0.873486	0.853177	0.700259	1.52062	2.0967	6.74983	1.40743	0.558398	1.19333	1.32675	0.344572	0.577419	2.40936	0.839663	2.14581	0.706476	0.43309	0.917343	36.1964	0.521094	0.320528	11.2738
b0464	acrR AcrR transcriptional repressor	2.90587	3.69644	2.68257	3.34402	2.58926	3.01964	4.908	2.17237	2.22436	1.08393	3.48323	1.55426	6.13297	0.853963	10.1029	7.47598	8.05871	5.93016	4.64653	20.1179	20.2994	20.9458	31.0068	21.6264	34.6932	23.7388	2.07049	4.49869	26.957	17.1392	23.4001	33.1483	32.4715	18.0604	20.1593	22.4499	4.04034	3.72287	11.0537	5.17069	14.8091	20.3986	1.58939	3.3536	51.9746	4.19826	4.77408	55.7513
b0465	kefA KefA	0.816058	1.35192	1.11662	1.2664	0.588725	0.865082	0.491615	LQ	1.22543	LQ	0.426025	LQ	0.596228	0.9747	1.28241	1.64919	1.52537	1.15698	LQ	1.33773	1.2533	1.31978	1.56735	3.73928	1.33008	1.0898	1.30015	1.42059	1.45501	0.963262	LQ	4.36176	1.95196	1.41073	1.32748	LQ	1.49951	0.90923	2.03773	1.03278	1.70651	1.89797	1.30189	1.48207	7.1508	0.8059	0.744975	4.31405
b0466	ybaM predicted protein	0.728974	0.958471	1.49958	1.73715	0.603455	0.721976	0.658956	1.23858	1.10389	LQ	1.37865	0.878995	0.951324	1.29473	2.25341	4.32645	1.15559	0.878208	0.89043	1.23781	0.751549	0.789734	1.15644	0.658429	0.52666	0.605332	1.51876	1.01461	1.63181	0.803471	0.94668	0.635679	1.51475	1.18426	0.546677	0.599106	1.33602	0.975925	0.820313	0.831999	0.490971	1.99494	2.14398	1.70268	0.547344	0.672589	0.889966	0.67871
b0467	priC primosomal replication protein N''	0.900877	0.855257	1.77154	1.49968	0.372707	0.463582	1.43605	0.952768	1.3698	0.564667	0.259188	0.778414	0.48468	1.98404	1.72928	4.10809	0.944016	0.812819	0.791266	0.828622	0.308988	0.436597	0.355328	0.323711	0.140676	0.803984	1.29062	1.22729	1.52603	1.04328	0.958947	0.736408	0.545005	0.495877	0.31629	0.367261	1.16612	3.0232	1.02138	0.802826	0.191954	0.798226	1.13363	0.683508	0.707787	0.498363	0.835038	0.598527
b0468	ybaN conserved inner membrane protein	0.499353	0.766889	1.57343	0.609814	0.334535	0.337922	3.82833	0.356554	0.663493	0.58536	0.310919	0.866348	0.575711	1.32657	0.877648	1.15069	0.822936	1.04265	1.10579	0.499603	0.383999	0.328907	0.418007	0.24375	0.253956	0.362809	0.74739	1.76223	0.536504	0.413315	0.459939	0.396493	0.525957	0.692694	0.38743	0.345296	0.500495	1.0445	0.301488	1.34287	0.230516	0.842675	0.227298	0.846119	0.369404	0.682681	0.311086	4.19515
b0469	apt adenine phosphoribosyltransferase	0.393855	1.06783	0.800124	0.352853	0.297818	1.30316	1.58937	1.15939	0.586844	1.21011	0.363439	0.762462	0.362193	0.903379	0.66129	2.76728	0.793108	0.708488	0.608697	1.45569	0.281821	0.25821	0.263984	0.246761	0.404789	0.336581	1.40972	1.81831	0.376197	0.492082	0.437922	1.66345	0.785108	1.25395	0.230286	0.16287	0.548978	1.10358	0.42167	0.894771	0.133948	0.47904	1.06003	0.416763	4.57088	2.60732	0.215394	1.93778
b0471	ybaB conserved protein	0.575099	0.638535	1.27825	0.812624	0.25727	0.771591	0.951007	0.644522	0.489922	0.618519	0.367366	0.471429	0.618241	0.491198	0.286562	0.599204	0.862302	0.984003	0.826793	0.614487	0.361387	0.341498	1.93213	0.42829	0.214714	0.387584	1.22736	0.490682	0.554732	0.524542	0.498895	0.515413	0.622291	1.10293	0.281416	0.31799	0.390368	0.392629	0.300232	0.678932	0.312932	0.719179	0.258931	0.449111	0.685504	0.516856	0.336671	1.1504
b0472	recR recombination and repair	0.369735	0.827204	0.662403	0.568314	0.514529	0.877712	0.785887	0.770926	0.897757	1.26506	0.206783	0.693468	0.655207	0.678496	0.406621	0.536908	1.08087	0.732995	0.72242	0.489445	0.31519	0.354702	2.25865	0.215896	0.147464	0.299791	0.868342	0.426316	0.670919	0.478436	0.469733	0.709931	0.732943	1.96687	1.0525	1.13651	0.393289	1.04754	0.462944	0.978672	0.51044	0.46888	0.26975	0.573219	0.606667	1.40789	0.22735	0.652962
b0473	htpG HtpG monomer	0.769516	1.26535	1.11951	0.892889	1.01296	0.811114	2.03193	3.65665	2.89327	2.17846	2.1301	1.61496	1.91386	1.86987	1.03768	1.35588	1.22116	1.09814	1.06102	1.18636	0.545346	0.447642	1.67407	0.741379	1.08811	1.36032	1.07701	1.7267	1.27567	1.1773	1.11831	0.784819	1.52277	1.2613	0.332675	0.274748	1.30251	0.980547	0.926373	1.28041	1.04038	1.01421	1.61058	1.50891	0.661318	1.00549	0.499032	1.74484
b0474	adk adenylate kinase	0.194725	0.337926	0.283779	0.374422	0.169877	0.185825	0.266739	0.544012	0.532794	0.579576	0.322623	0.335347	0.406175	0.566631	0.517109	0.370892	0.302584	0.3621	0.402125	0.261067	0.191052	0.239223	0.432136	0.145911	0.20121	0.205322	0.352568	0.210063	0.334491	0.474299	0.51859	0.248274	0.32169	0.348635	0.128705	0.134605	0.228952	0.248343	0.182622	0.272629	0.302184	0.506166	0.176031	0.377001	0.176839	0.215705	0.202965	1.1214
b0475	hemH ferrochelatase	0.274486	0.308666	0.201309	0.215597	0.134203	0.181639	0.647506	0.490749	0.411311	0.473759	3.34762	0.479627	0.33267	LQ	0.305962	0.276835	0.188175	0.279279	0.307807	0.222095	0.129639	0.122872	0.277642	0.129145	0.153997	0.145899	0.454076	0.126561	0.284154	0.15247	0.169382	0.295727	0.283986	0.297359	0.114963	0.0967928	0.343574	0.196118	0.386471	0.182381	0.131739	0.373103	0.115933	0.332341	0.13508	0.191506	0.146466	0.268111
b0476	aes acetyl-esterase	1.63958	1.2186	0.869585	0.376289	0.168291	0.49838	0.682082	0.928983	0.910338	0.873956	0.536441	1.19979	1.0093	0.4791	0.999337	0.306949	0.470577	1.10499	1.12463	1.17303	0.201836	0.211802	0.316787	1.51051	1.42015	0.504973	1.39231	0.990195	0.904023	0.645207	0.587901	0.922284	1.51542	0.656014	0.282727	0.291097	1.03653	0.36466	0.595194	0.965266	0.30478	1.47148	0.430703	0.929476	0.143742	0.538204	0.199963	0.742662
b0477	gsk guanosine kinase / inosine kinase	1.22221	0.914679	1.19179	1.45121	1.47076	0.360129	1.2809	0.844744	1.00129	1.25555	0.159664	0.489609	0.393739	0.872652	1.06912	0.75775	0.666131	1.08689	0.978998	1.22395	1.11729	0.977771	0.48466	0.209396	0.767873	0.489214	1.31129	0.607039	1.14053	0.469224	0.472452	1.1094	1.05211	0.823541	0.251609	0.167175	0.537115	0.468068	0.660486	1.35729	0.669856	1.33393	1.09234	1.39839	0.22582	0.970899	1.41409	3.42571
b0478	ybaL YbaL CPA2 transporter	0.796644	1.29165	1.00747	0.644274	0.235092	0.577285	1.66676	0.880735	1.01582	1.41429	0.528001	1.61837	0.448469	0.71866	0.742577	1.53462	0.820648	1.19846	1.34017	0.754255	2.08856	2.60339	0.950072	3.80263	1.03197	1.30754	1.5613	1.28318	1.26317	1.06724	1.10067	0.810927	0.389312	0.736589	1.49499	1.46955	0.594274	0.944691	0.527543	0.681221	0.246573	0.614052	0.433147	1.25237	2.22881	1.01601	0.442564	0.385107
b0479	fsr Fsr fosmidomycin MFS transporter	0.404466	1.26713	0.496191	0.892801	0.954905	1.64069	0.43227	0.899314	0.717793	0.445911	0.363388	0.600405	0.30377	0.916765	0.801669	0.568216	0.796444	0.839819	0.89192	0.474483	1.61534	1.7461	1.49531	0.170329	1.51788	3.9693	1.14493	0.881877	1.13823	1.0405	1.01975	1.09558	0.308695	0.848935	0.234562	0.229152	0.790435	3.32018	0.757288	0.586683	0.925856	0.505989	0.514431	0.444989	3.48332	0.973883	0.775659	1.01354
b0480	ushA 5'-nucleotidase / UDP-sugar hydrolase	0.45485	0.932964	0.52879	1.05947	0.338253	0.761654	0.428614	0.209915	1.21261	1.06936	0.786382	0.608883	0.50751	1.12583	0.949577	0.94688	0.852186	1.05097	1.04925	0.937992	0.196964	0.202707	0.198537	1.59135	1.37489	0.374739	1.12524	0.327594	0.999667	0.718617	0.616636	1.60517	0.858267	0.826067	0.775099	0.641724	0.513506	1.66042	1.61013	1.12726	0.785347	0.470393	0.311168	0.600648	1.74493	1.14172	1.49049	0.821001
b0481	ybaK Cys-tRNA Pro and Cys-tRNA Cys deacylase	0.309901	0.704136	0.794614	0.868002	0.8991	0.550061	0.244203	0.355981	1.19978	2.39857	3.23504	0.362531	0.520639	0.590486	0.609969	0.701214	0.42494	0.790603	0.800247	0.727475	0.243875	0.329596	0.534956	0.82992	0.280834	0.311572	1.09733	0.64728	0.867307	0.415319	0.508297	0.930065	0.606063	1.49169	0.228922	0.300519	0.370108	0.62995	0.392434	0.71353	0.527611	0.835654	0.632808	1.00843	1.75501	1.06378	0.536443	0.512342
b0482	ybaP conserved protein	1.477	0.671877	2.2537	0.835285	0.139403	0.334112	0.200158	0.275067	0.457807	0.502252	0.56513	0.225569	0.375918	0.280315	0.370096	0.181788	0.209881	0.306786	0.342326	0.255389	0.0990574	0.134108	3.21944	0.582121	0.443342	0.280431	0.845296	0.444347	0.448274	0.866758	0.847181	0.384043	0.519497	0.721672	1.25899	1.0787	0.616524	0.417687	0.166324	0.441977	1.64686	0.432149	0.17092	0.329017	0.215384	1.41487	1.67211	0.772537
b0483	ybaQ predicted DNA-binding transcriptional regulator	0.650658	0.988678	0.955092	1.08585	0.389064	2.56723	1.20064	0.668891	0.595871	LQ	0.53307	LQ	1.7326	1.01003	0.406067	0.733224	1.39893	0.56905	0.577577	1.24746	0.490145	0.517353	0.952492	0.65338	3.30507	0.428339	1.23094	1.43064	1.20572	1.55917	1.2725	0.676854	1.34487	1.24533	0.78409	0.825339	0.486123	0.49462	2.05445	0.698677	3.07014	1.20708	0.666292	1.08812	0.416604	0.729589	0.540864	1.09773
b0484	copA Cu +-exporting ATPase	0.226843	0.731752	0.455057	0.398708	0.646834	0.34238	0.222722	0.773481	0.226556	0.466749	0.335351	0.299899	0.439554	0.46908	0.394462	0.37024	0.426996	0.650327	0.645636	0.173575	0.2975	0.319571	0.348098	0.166447	0.450252	0.167278	1.26324	0.732152	0.48145	0.333019	0.279336	0.366643	0.517829	0.58006	0.202681	0.133394	0.244721	0.368056	0.236025	0.320147	0.326905	0.610768	0.123701	0.409405	0.12952	0.821907	0.201216	0.440492
b0486	ybaT YbaT APC transporter	0.79476	1.4107	1.25823	1.04517	1.5987	0.976563	1.03455	0.905031	1.19143	0.710077	0.226462	0.869473	0.522369	0.504303	1.22982	2.82237	1.15144	1.23316	1.15811	0.86593	1.77267	1.70749	0.375697	3.72036	2.09796	0.582522	1.1352	0.83835	2.07611	1.18736	1.20804	1.08635	0.397681	1.26476	0.339994	0.405213	1.26347	3.34578	0.569531	1.56439	2.37614	1.70684	0.947316	1.95696	4.05718	0.792132	0.499339	1.11916
b0487	cueR CueR transcriptional dual regulator	0.326059	0.859347	1.35785	1.22427	0.307358	0.808333	0.430054	1.42263	1.0076	0.605981	0.214535	0.526326	0.281704	0.506489	0.958332	5.95654	0.765574	1.78905	1.96881	0.408308	1.14258	1.11732	0.574196	0.496251	0.368084	0.250292	0.796009	1.66868	1.23929	0.4425	0.510107	0.55199	0.399785	0.455051	0.144857	0.177175	0.8487	0.912315	0.412853	0.770912	0.845931	0.854968	1.00511	0.793451	2.42965	0.582203	0.314774	0.26252
b0488	ybbJ conserved protein	0.421463	1.03445	0.962879	0.559219	0.565071	0.410553	0.499903	1.17514	0.995281	0.431202	0.344839	0.544155	0.385958	0.811711	0.720667	0.747897	1.12518	0.819497	0.951993	0.598559	1.61467	1.73909	0.81677	0.365732	1.11431	0.369835	1.25289	0.550745	1.06548	0.34838	0.490634	0.826903	0.709128	1.23148	0.530162	0.646114	0.404211	0.659113	0.608155	0.681152	0.330474	1.07209	1.14824	1.14584	0.415966	0.600399	0.394744	0.745226
b0489	qmcA putative protease	0.698199	1.17909	1.67101	0.902274	0.822955	1.22219	0.765669	1.1527	2.07167	0.939753	0.272958	0.832586	0.767493	0.516078	1.13189	2.50628	1.33616	1.46961	1.5416	0.683365	0.583741	0.735364	0.576131	0.264481	1.82903	0.449405	1.36915	0.818914	1.03009	0.634536	0.862724	1.16276	0.856732	1.6708	0.202888	0.190352	0.749441	1.40535	1.59488	0.745381	0.672813	0.546174	2.37066	0.86355	0.349477	0.988297	0.551512	0.884172
b0490	ybbL predicted transporter subunit: ATP-binding component of ABC superfamily	1.9781	2.99539	3.57641	1.64354	2.51546	2.85636	2.84801	1.55623	2.46485	1.9339	2.95374	2.05898	1.78007	0.934514	3.04233	6.90542	3.50569	2.48814	2.30339	4.78101	6.34007	5.5183	2.0305	1.58697	3.32792	4.30489	2.88148	2.99383	2.08959	2.36896	1.8725	3.31015	3.116	1.56382	0.399883	0.414486	1.86544	2.95262	3.18256	2.68988	6.28101	1.88561	2.511	2.24534	3.72493	3.55316	1.56786	3.38322
b0491	ybbM putative metal resistance protein	2.80336	3.95925	3.07899	2.79587	2.48384	2.94941	3.73824	1.58586	2.29808	2.84799	5.02118	1.67347	1.03313	0.982251	2.94097	3.79115	4.04563	3.43867	3.12601	3.62883	3.86589	3.35487	5.32224	2.51582	5.96161	2.54192	2.90875	3.96607	2.54029	3.61071	3.74471	2.50743	4.31919	4.34983	0.285303	0.317532	2.60928	1.79591	1.83493	2.30676	2.37409	3.31845	2.80571	3.13039	3.68347	3.93059	2.79033	4.29973
b0492	ybbN chaperone and weak protein oxidoreductase	0.653511	1.02482	0.575192	0.951374	0.656645	0.881127	0.626726	0.328459	0.556384	0.629746	0.452065	0.821602	0.270836	0.484023	1.07335	2.95904	0.820746	0.92798	1.01905	0.379116	0.263651	0.447719	0.80922	0.159607	0.473092	0.784658	1.03659	1.13621	1.6936	0.351109	0.456884	0.747447	0.417833	0.685172	0.373907	0.353368	0.721758	0.899458	0.636775	0.508291	0.321701	1.02166	0.619523	2.10139	0.571681	0.733596	0.420998	0.46357
b0494	tesA TAP complex	0.344648	0.845326	0.616869	0.521882	0.668377	0.627562	0.593157	0.386473	0.545627	0.977316	1.46203	0.510278	0.327974	0.338511	0.696158	0.316028	0.819578	0.825422	0.882247	0.858253	2.12838	1.73845	1.12742	0.732231	1.22688	0.453855	1.56304	0.809395	1.0909	0.234343	0.256487	0.526668	0.294847	0.795407	0.109476	0.114434	0.535338	0.170432	0.363772	0.538911	0.126962	0.503197	0.313337	0.291634	0.129622	1.41744	0.371027	1.55824
b0495	ybbA YbbA/YbbP ABC transporter	0.750549	0.900131	0.909286	0.422647	0.635969	0.696955	0.439375	0.387594	0.568407	0.959698	0.880239	0.766181	0.270133	0.756257	1.01287	0.424894	0.870709	1.08532	1.16859	0.666635	0.861349	1.06288	0.818181	0.454921	0.18918	0.238544	0.982171	0.455685	0.73317	0.898619	0.780174	0.510578	0.411398	1.08855	0.142148	0.105952	0.363309	0.218676	1.11671	0.417688	0.0853764	0.417214	0.600288	0.65991	0.126613	0.841772	0.505351	2.5148
b0497	rhsD RhsD protein in rhs element	1.97188	1.79275	1.94807	1.73536	1.33304	2.34792	2.43335	1.43922	3.38998	1.51099	2.51583	2.01358	9.30079	1.32807	3.78468	2.02686	3.84965	1.79637	1.31283	5.14744	2.54082	1.45616	2.17059	2.46915	7.10861	1.9211	1.97613	1.54046	2.1069	2.12573	2.2991	8.59265	2.83419	2.68164	1.65006	1.7829	7.31877	1.51088	4.07904	2.12308	1.58624	2.30769	1.87878	2.01735	3.15528	4.04124	3.57825	8.64577
b0499	ylbH conserved protein, rhs-like	8.16054	5.46003	5.39588	5.02114	10.1568	10.9129	2.86697	2.92173	2.12254	2.99197	1.36783	4.62935	0.833036	0.535972	3.289	5.83594	3.44783	3.68406	4.22034	4.2716	5.379	6.7941	5.65537	7.15279	2.8474	5.05634	3.14206	6.31118	3.92109	4.8674	6.28538	4.80534	8.36835	4.36171	6.0359	7.77004	5.04279	4.00893	2.62346	6.35824	7.24782	4.50578	7.33987	2.97456	14.0865	5.42259	7.27074	4.07435
b0501	b0501	1.15048	1.12209	1.09758	1.26242	1.2841	1.19684	0.845132	LQ	0.977725	1.03276	0.857717	LQ	1.22668	1.15665	1.49954	1.45443	1.28352	1.31998	1.21537	1.0111	1.76276	1.27992	1.75448	2.00009	0.841613	1.50022	1.21259	1.15396	1.25651	1.21871	1.20149	1.28767	1.5259	1.43624	1.25553	1.13704	0.816983	1.20538	1.1083	1.28992	1.23685	1.68576	1.03142	1.19108	0.835511	0.852899	1.34886	1.27412
b0502	ylbG predicted DNA-binding transcriptional regulator	0.700926	1.30577	0.887165	1.4574	0.512027	0.732134	1.07978	0.818082	0.496037	1.03864	0.851939	LQ	0.681938	0.551166	1.08548	0.799182	1.47861	0.786291	0.957141	0.677418	1.13873	1.31135	0.748003	5.75296	0.552213	0.873778	1.20567	2.06926	1.10318	0.702356	0.895897	0.973644	0.893514	1.1026	0.439765	0.682974	0.711514	2.48602	0.478261	1.79759	5.62001	0.938659	1.18529	0.599351	0.386934	0.840714	1.08964	0.921564
b0503	ybbB tRNA 2-selenouridine synthase	0.847867	1.64186	1.31938	0.875621	0.576841	1.63346	1.65414	1.246	0.636849	0.664114	0.179274	1.26872	0.272431	0.322098	1.02144	1.2608	0.709428	0.874864	0.940677	0.444676	1.46163	1.4649	1.2484	0.54113	0.39039	0.275372	1.26342	0.360831	1.49162	0.753519	1.0157	0.924602	1.52216	0.862032	0.224096	0.242634	1.11002	1.61202	0.950579	0.615455	0.175563	0.944587	1.15823	0.829086	0.339147	0.648252	0.38934	0.85767
b0504	allS AllS transcriptional activator	0.887129	0.934089	0.626023	1.12593	1.539	0.276611	0.710726	0.451041	0.708461	0.37394	0.489473	0.596364	0.282336	0.498486	0.889831	0.36392	0.514091	1.26304	1.06107	0.361027	0.915671	0.935958	0.374722	0.1469	0.361518	0.136407	0.663349	0.903047	0.624485	0.517767	0.532674	0.648001	0.657595	0.428024	1.74162	2.09624	0.39235	1.43141	1.31634	0.699812	0.1654	0.577594	0.40051	0.630031	0.796429	0.751735	0.28716	1.59879
b0505	allA ureidoglycolate hydrolase	1.26638	0.579314	1.13268	0.556872	0.911995	0.542574	1.10541	0.72267	0.674532	0.826625	0.256661	0.769333	0.577352	0.657007	0.912775	0.723701	0.372156	0.781536	0.7363	0.38839	1.7177	1.57735	0.53513	0.275772	0.32553	0.380958	0.495826	0.917361	0.77527	0.95823	0.957856	0.386514	0.888549	0.631058	0.26948	0.347144	0.35164	0.433834	1.98123	0.412654	1.22945	0.759907	0.24316	0.43505	2.04085	0.297927	0.398814	0.521318
b0506	allR AllR transcriptional repressor	0.520458	0.76386	0.533324	0.726479	1.76079	0.51545	0.901229	2.03395	0.522341	0.773439	0.201879	2.48531	0.308423	0.459464	1.21877	0.344079	0.864132	0.78965	0.833887	0.361883	0.457826	0.541394	1.28829	0.10891	1.95138	2.1559	0.745022	0.35317	1.16032	0.670188	0.699748	0.446858	0.643904	0.510426	0.163707	LQ	0.413314	0.988607	0.435756	0.446253	0.151641	0.711305	0.120882	1.72321	0.139563	0.730272	0.191628	1.1177
b0507	gcl glyoxylate carboligase	0.681869	1.23191	0.73058	1.05911	1.02038	0.921868	0.837153	0.779604	0.894876	1.4272	0.439189	0.565065	0.267408	0.404811	1.28782	1.15108	1.2296	1.96275	1.79546	1.39846	0.683741	0.783803	0.935637	0.475662	1.18344	0.631538	1.68893	1.71148	1.12511	0.997762	1.02805	1.25984	0.933954	1.23453	1.47411	1.31107	0.625475	0.960523	0.902572	1.29154	0.986329	0.853285	1.45411	1.06155	0.243907	1.79859	0.333054	3.18836
b0508	hyi hydroxypyruvate isomerase	3.21185	3.38086	3.16985	4.52998	2.22497	3.34141	4.73387	1.97961	2.38545	3.68054	4.422	2.30451	1.27074	0.472937	4.60656	1.64608	7.21375	3.14532	3.2391	4.88386	1.36064	1.67968	2.95441	3.89145	5.85501	5.38269	3.85644	4.65767	2.44774	2.67346	3.40698	3.11844	1.90294	4.31614	1.65598	2.01285	2.67942	4.26072	2.54839	3.69944	6.75755	3.39437	5.05629	1.94543	2.04711	9.10394	2.15162	7.98812
b0509	glxR tartronate semialdehyde reductase 2	2.6409	3.97232	2.92391	3.35424	3.24697	3.23764	4.50121	2.61782	2.04231	3.44689	2.43005	1.95986	0.679706	0.311629	3.85975	2.08211	3.90971	4.18853	3.95886	3.03395	3.24052	3.53665	3.77759	6.43267	2.31563	3.89712	3.60086	3.34357	2.12197	2.80743	3.51959	2.35385	3.54353	4.78144	3.3518	3.22995	1.79718	2.25221	2.6064	4.54822	5.93493	3.72963	4.09566	4.08485	0.871306	4.20183	1.49671	4.59408
b0510	ybbV predicted protein	1.57371	1.63381	1.55736	1.48365	3.48334	2.49889	1.16973	LQ	2.18192	LQ	1.1333	LQ	1.51339	1.084	2.68487	2.0226	1.80423	1.5263	1.3993	2.17509	2.0698	LQ	1.4191	0.86909	1.01015	1.81609	1.56481	2.66902	1.42046	2.01152	1.78289	2.15774	1.74861	1.5585	1.08411	1.01144	2.88045	1.60192	1.45967	1.52183	2.01421	1.88479	1.27782	2.05165	1.806	2.03027	2.32235	1.28153
b0511	ybbW YbbW NCS1 Transporter	5.31856	4.9563	5.14343	5.20258	5.79084	8.75331	8.13771	3.76258	4.50728	4.21006	8.9961	5.95719	3.00082	1.82137	7.58653	4.76594	6.36455	4.99685	5.3323	7.3324	6.27173	6.59578	5.70722	5.8625	7.68653	7.26002	6.60099	5.38847	5.92715	5.31213	5.99499	7.05809	6.87064	4.90166	4.73225	6.08676	7.73763	4.03288	5.87488	7.013	6.67447	7.06051	4.81279	5.86257	9.16571	11.6289	5.66025	6.19728
b0512	allB allantoinase	0.961973	1.04457	1.62648	1.60805	0.689491	1.17111	0.472339	0.578394	0.796025	1.536	1.02885	0.780744	0.596443	0.459867	1.43203	0.562011	1.47433	0.922742	1.08408	1.2686	0.892611	1.06538	1.32288	1.49341	2.92375	1.07514	1.78051	2.40315	1.21393	0.96644	1.12539	1.49742	0.926958	0.933785	0.59506	0.781319	1.02116	1.80319	1.78821	1.12165	0.525017	1.26084	0.739647	2.4388	0.684852	0.874792	2.27243	2.92577
b0513	ybbY predicted uracil/xanthine transporter	2.56113	3.37506	2.5224	2.12539	4.05986	2.4944	2.91826	3.21156	1.73017	2.12974	2.45361	1.39333	1.1664	0.699505	2.64466	1.99211	3.25972	4.14044	4.28547	3.15744	2.1538	2.06104	1.81746	2.70838	6.21055	2.51081	4.02297	2.19395	3.27323	3.32804	3.49972	5.98496	3.13502	7.65574	4.82537	5.76843	1.41548	2.43138	2.39837	3.65536	3.25357	2.24021	3.66187	3.33356	12.9209	2.81745	0.957409	12.7993
b0514	glxK glycerate kinase II	1.02074	2.68064	1.472	2.55823	1.26374	1.45322	1.31874	1.91783	1.18938	2.10264	3.19917	1.91038	0.426488	0.405891	2.08935	1.67487	1.66985	2.12381	2.65901	1.66726	2.80003	3.22649	2.00719	0.527002	1.55027	0.820484	2.23742	2.07079	2.18953	1.409	1.80884	1.57907	2.20441	2.14345	0.451842	0.744723	1.19631	2.78658	1.30209	1.96976	1.43269	1.88894	0.428796	1.06762	3.43143	2.77046	0.666349	1.91897
b0515	ylbA conserved protein	9.46443	6.2215	7.92746	6.19186	6.87786	11.0675	5.37866	7.29299	4.68438	6.97704	7.02155	10.7684	1.91696	1.59112	6.8286	5.23573	8.01069	6.77343	6.83978	9.46938	7.45453	7.86561	8.07715	9.42562	10.3133	7.22984	8.58487	8.40286	5.78451	8.93087	8.70463	8.57751	10.4014	8.82668	13.3463	14.3172	8.56286	5.46479	5.00477	8.32125	12.1879	8.6849	10.3788	7.44332	11.394	11.9499	10.1555	9.74002
b0516	allC allantoate amidohydrolase subunit	4.43178	4.37986	4.73777	4.11035	4.13531	4.7987	5.11798	4.16102	3.54784	3.25806	1.62623	2.7727	0.720569	1.52945	4.90737	4.72654	3.49932	3.98938	5.0197	4.70375	5.10804	6.64223	4.45753	5.32377	8.05569	4.21266	4.42328	3.59212	3.92855	4.58521	5.558	3.96491	3.45773	2.61221	3.66384	5.32299	5.51364	4.1716	5.10978	3.95868	2.45565	3.49124	4.59116	4.02827	3.43447	6.85381	4.25702	5.12439
b0518	fdrA involved in protein transport; multicopy suppressor of dominant negative ftsH mutants	1.45435	1.50971	1.74647	1.25503	2.8283	1.68405	1.71545	1.69295	1.18095	0.612314	0.745597	1.98966	0.26025	1.30584	1.90098	1.38657	1.64739	2.09575	2.32531	1.04969	2.43275	2.45395	0.971111	2.06129	0.872309	1.30221	1.37009	1.88763	1.97681	1.11186	1.37144	1.63204	0.961059	1.33327	1.99287	2.37703	1.73101	2.05696	2.75038	1.24505	4.87022	0.829711	0.825183	1.21252	1.94919	0.955291	2.36576	1.80583
b0519	ylbE	0.594898	0.514543	0.638573	0.4202	0.643341	1.20271	0.496597	0.438897	0.553336	0.577751	0.232306	0.505008	0.202074	0.553657	1.08815	0.838637	0.959702	1.05845	1.04438	0.203538	0.579608	0.730116	1.2384	0.391664	0.143872	0.303281	1.09521	0.58187	1.53828	0.498017	0.530347	0.610856	0.406106	0.980662	0.175389	0.274746	0.603329	0.389719	0.842926	1.13	0.686027	0.584058	0.260572	1.32975	1.52175	0.578574	1.27782	0.944131
b0520	ylbF conserved protein	0.56037	0.846346	0.673957	0.556118	0.205693	0.410824	1.10033	0.319394	0.64012	0.699873	0.717404	0.816119	0.513751	0.545059	1.53793	0.480617	0.712001	1.00276	0.995141	0.95426	0.205102	0.248903	0.693795	0.556328	0.463266	0.44449	0.726621	0.183446	0.740487	0.904729	0.830422	0.50714	0.228957	1.03208	0.506029	0.676244	0.492526	0.773426	1.32314	0.654214	0.332963	0.538111	0.228152	0.520323	0.148529	0.439908	0.337591	0.839721
b0522	purK N5-carboxyaminoimidazole ribonucleotide synthase monomer	0.12396	0.197917	0.138048	0.303356	0.105177	0.115909	0.194977	0.23634	0.236546	0.236631	0.194593	0.140819	0.162236	0.465035	0.190652	0.199146	0.195153	0.436327	0.474596	0.158987	0.12631	0.149381	0.285384	0.104134	0.139742	0.104119	0.257364	0.102461	0.227012	0.148109	0.164639	0.360735	0.24832	0.404801	0.243012	0.24853	0.150427	0.11777	0.0962047	0.116016	0.133534	0.479185	0.119705	0.181284	0.714444	0.167576	0.848028	0.275144
b0523	purE N5-carboxyaminoimidazole ribonucleotide mutase	0.152824	0.155785	0.139089	0.183927	0.10072	0.131026	0.264845	0.201996	0.168005	0.145051	0.201928	0.192453	0.200857	0.214688	0.269364	0.282347	0.384393	0.227813	0.200416	0.191386	0.172712	0.13817	0.797489	0.148953	0.184395	0.203456	0.229113	0.118248	0.281276	0.139128	0.155581	0.373808	0.368122	0.351799	0.122708	0.112892	0.274166	0.186868	0.129358	0.142709	0.163153	0.334641	0.141386	0.21961	0.148514	0.17619	0.225213	0.247626
b0524	lpxH UDP-2,3-diacylglucosamine hydrolase	0.507165	0.183475	0.188519	0.24867	0.164276	0.202222	0.193576	0.320679	0.185091	0.297823	0.180287	0.402508	0.229411	0.302245	0.242422	0.336457	0.183358	0.215985	0.340629	0.163079	0.161928	0.274764	0.293468	0.212609	0.142721	0.190609	0.319992	0.1886	0.499777	0.212818	0.263931	0.357735	0.710057	0.350627	0.135099	0.192997	0.298461	0.216802	0.119245	0.189492	0.157753	0.395215	0.217869	0.266115	0.195784	0.172065	0.256072	0.263007
b0527	ybcI conserved inner membrane protein	0.719385	0.879392	0.59928	1.34454	2.95073	0.461414	0.339809	0.476231	0.626069	0.593181	0.285666	1.01714	0.430927	0.64138	0.452198	0.510555	0.581172	0.471738	0.475016	0.44521	2.23913	1.86499	0.322243	0.327945	2.30632	0.414827	1.05445	0.497911	2.01369	0.950221	0.812223	1.00625	0.419577	2.14783	0.201601	0.221066	0.481774	1.84852	0.864102	0.517596	1.11685	0.583689	2.32837	0.959356	6.72614	1.94381	0.248972	0.653099
b0528	ybcJ predicted RNA-binding protein	0.504074	0.588962	0.562093	0.6123	0.484079	0.493434	0.429383	0.647467	0.542876	0.606023	0.44457	0.734439	0.492846	0.647278	0.549632	0.882793	0.718856	0.677419	0.70219	0.758961	0.824447	0.908167	0.798348	0.483184	0.488105	0.492825	0.80183	0.427339	1.19327	0.496209	0.625091	0.619518	0.871064	0.933976	0.362466	0.441479	0.350553	0.552248	0.448357	0.596235	0.429143	1.1012	0.411993	0.988218	0.528178	0.521606	0.512132	0.699255
b0529	folD methyleneTHF enzyme	0.358253	0.416984	0.693497	0.431511	0.319108	0.315676	0.3072	0.608726	0.330698	0.463544	0.466147	0.744456	0.211481	0.268814	0.417106	0.405483	0.575783	0.59052	0.803992	0.386618	0.575799	0.838196	0.371181	0.219068	0.266517	0.35761	0.483141	0.267648	0.467948	0.403802	0.585203	0.611178	0.458319	0.681945	0.366265	0.526835	0.291668	0.540253	0.423284	0.517771	0.531606	0.579176	0.272142	0.53117	0.319736	0.374027	0.429617	1.03527
b0530	sfmA predicted fimbrial-like adhesin protein	7.75738	5.61823	6.56593	5.97024	11.3798	8.08016	3.68215	4.37404	5.53972	2.51375	7.35961	5.37914	0.454886	1.03237	7.69862	4.42325	6.71719	6.06855	6.05136	8.28371	5.40349	6.39255	5.28961	6.88493	4.69303	8.57958	4.52527	5.88806	6.3308	6.94279	7.62755	8.80444	7.92951	5.94922	12.6665	13.4021	12.8677	7.25171	10.1026	5.72042	6.45712	4.52579	6.49338	5.5673	11.6832	8.04324	10.2341	9.36413
b0532	sfmD putative outer membrane protein, export function	10.3175	9.73066	12.3893	9.94763	11.9389	15.2854	4.21468	5.93089	3.47237	4.3671	2.18616	8.48566	1.82126	1.56298	5.20525	14.877	4.30672	8.92808	6.72098	4.4417	8.88753	6.16487	14.1145	3.47662	3.96211	13.6058	7.38318	12.2792	12.1069	9.12114	10.1367	3.80104	8.78146	8.1955	7.63216	8.20243	5.06499	14.8854	4.12725	10.0096	11.6861	6.88448	11.2181	8.80849	20.092	3.59583	8.08682	6.23145
b0533	sfmH predicted fimbrial-like adhesin protein	3.07114	3.53097	4.27975	4.17615	3.45221	3.5353	3.9382	2.10907	2.65245	2.71561	1.43711	2.89452	3.31044	1.35728	5.6188	4.22253	8.16446	4.62519	4.49545	5.53239	3.1651	3.24711	4.1014	5.1608	5.57668	3.71294	4.73085	4.75274	4.86633	3.81271	3.79699	4.42463	3.49297	3.49148	4.28057	4.18536	3.65554	2.88122	3.90607	3.897	3.26662	2.86825	2.30885	3.86042	3.04814	8.04099	5.49553	10.3971
b0535	fimZ FimZ transcriptional regulator	2.95615	2.17131	2.40495	2.40808	1.59549	2.73409	1.79797	1.31478	1.7509	LQ	0.540596	LQ	3.0833	0.98722	2.58018	1.10375	2.6021	1.6866	1.5377	2.57457	4.20991	2.91165	2.69551	2.02079	4.62332	2.76554	2.67295	LQ	2.18275	3.23861	2.40842	2.33913	2.01614	2.28688	0.84554	LQ	2.25751	2.18359	1.85464	2.30426	2.35807	2.10789	1.07003	1.94414	1.70317	3.85843	3.2948	4.76661
b0537	intD DLP12 prophage; predicted integrase	3.3597	2.91968	4.99636	3.23334	1.41459	3.59319	2.39343	2.56014	2.60615	0.921628	0.255056	1.61419	0.423675	0.504959	2.22111	2.39461	1.59657	1.56679	1.3174	1.70411	1.66224	1.63816	2.10175	0.448	1.38584	0.936077	1.42326	2.55383	3.62177	2.74728	2.56395	1.99783	2.63922	1.07274	2.21865	2.86926	6.63278	7.2306	4.66759	1.79065	0.624462	1.65438	0.647348	2.90324	3.85658	0.646694	2.05478	1.57763
b0538	b0538 DLP12 prophage; putative sensory transduction regulator	1.05875	1.24637	1.8654	1.07962	1.23484	2.05232	2.13504	LQ	0.861846	LQ	0.762764	LQ	0.689904	0.677522	1.64488	0.511649	2.87195	1.06294	1.0972	2.00091	1.41874	1.79113	4.56517	0.301024	0.921841	1.65332	2.7662	1.37712	0.73855	1.58418	1.57466	1.47583	0.761699	2.71036	1.20238	LQ	1.13937	0.924714	0.961215	2.51348	0.339214	1.2627	0.668355	0.867667	0.299235	1.53011	0.606242	2.18561
b0539	ybcC DLP12 prophage; predicted exonuclease	0.892907	1.03583	1.64641	1.23205	0.784797	1.75327	1.56143	LQ	0.974822	LQ	0.693617	LQ	1.05442	1.07774	1.55473	1.0034	1.96088	1.12467	LQ	1.93984	0.735554	LQ	2.65249	0.40561	0.851975	1.80946	2.40201	1.40178	0.967318	1.43909	1.50684	1.2181	1.09601	3.2027	0.508786	0.594318	0.944234	0.706719	0.942263	1.58137	0.450459	1.64476	0.829997	1.14739	0.4296	1.18051	0.570863	1.42407
b0540	insE-3 IS3 element protein InsE	2.22245	1.97116	2.26476	1.8578	2.88479	2.37271	1.32901	0.974447	1.12758	1.04712	1.34035	1.26125	0.829696	0.772403	1.40822	2.47213	1.4694	1.61243	1.21872	1.22658	2.92161	2.2014	3.51249	3.61228	1.37954	2.26167	1.30653	2.34733	1.51299	2.06529	1.64146	1.34895	1.677	1.36136	0.436079	0.568096	2.48629	1.89116	1.29353	1.93645	2.78908	2.16495	2.52878	2.38765	0.559853	0.939236	1.27653	2.03951
b0541	insF-3 IS3 element protein InsF	1.10085	1.51358	1.45904	1.70073	1.67226	1.09837	1.59339	1.52558	0.987834	1.4357	1.15451	1.66791	0.436268	0.50301	1.6624	1.52433	1.86973	1.65425	1.85662	1.84825	2.28835	2.49664	1.95109	2.82493	1.24809	1.43191	1.66615	1.23389	1.72081	1.76399	2.01775	1.31867	1.52555	1.5571	1.34496	1.58166	1.19191	1.68244	1.33536	1.4418	1.56237	1.5048	1.16754	1.57145	1.42165	2.841	1.30145	2.08542
b0542	renD DLP12 prophage; predicted protein	1.34115	1.28203	1.43921	1.48907	1.23216	1.26417	1.3113	LQ	1.11723	LQ	0.985984	LQ	1.17641	1.11006	3.3458	1.59159	2.82954	1.01431	1.26011	1.73967	1.04223	1.21379	2.0039	1.34358	1.62898	1.24197	1.65964	LQ	1.86219	1.37429	LQ	1.46532	2.16443	1.87673	1.15919	LQ	1.26353	1.25984	1.14169	LQ	1.28291	1.90412	LQ	1.53939	1.37838	1.64831	LQ	2.12324
b0544	ybcK DLP12 prophage; predicted recombinase	2.99946	1.85094	2.78806	1.76595	1.97136	3.36958	1.35971	1.05883	1.20914	0.882628	1.03212	1.52568	1.57852	0.844866	1.5167	1.50808	1.01101	1.79035	2.31335	1.67997	1.80054	1.48475	1.63849	2.34016	1.51815	3.4422	0.917048	1.41964	1.28469	2.99964	2.96903	2.43621	2.82948	1.42105	4.80789	4.29789	3.9513	2.57818	3.24985	1.93006	3.6303	1.39132	2.8034	1.35199	4.56748	0.704061	5.28697	1.92172
b0545	ybcL DLP12 prophage; predicted kinase inhibitor	7.51872	4.66087	6.26572	4.25475	6.7645	6.46832	7.54424	4.14277	2.87342	LQ	3.34863	4.63101	1.00456	0.662633	4.72532	5.24345	3.09008	5.47904	4.0496	4.71646	6.82188	5.15748	6.57573	3.58182	9.37076	8.39238	3.54652	3.85154	5.95761	6.49134	4.9627	4.34897	8.73195	7.24882	2.34645	2.26889	7.46954	5.69327	5.22258	4.84103	5.57473	7.37212	6.40522	7.08219	8.08325	5.58889	8.53272	4.80218
b0546	ybcM DLP12 prophage; predicted DNA-binding transcriptional regulator	3.28607	2.87116	2.38596	4.48855	2.87148	2.75251	1.20355	LQ	2.45298	1.89432	2.69193	LQ	5.07038	1.20542	3.95463	1.49331	4.13666	3.54277	2.63225	3.16848	5.40692	3.9763	1.50321	1.92137	2.12853	3.58212	2.46965	5.36118	2.00434	3.45005	2.66702	7.55658	2.98155	2.17897	9.14175	5.71624	4.75892	3.03198	5.04155	4.43258	7.25741	2.30924	5.72042	1.92477	12.0474	2.66072	8.50929	5.38244
b0547	ybcN DLP12 prophage; predicted protein	3.45192	2.87495	1.6552	2.07369	2.20236	1.86302	1.44315	1.14557	1.4975	2.06847	0.805489	3.82351	1.44544	0.995664	2.97985	0.909938	2.08021	2.76144	1.9902	2.81825	1.76191	1.81889	3.49627	0.52329	1.35603	1.95833	2.16968	2.18558	2.73205	1.59889	1.60019	3.19413	1.97055	1.07686	2.28513	1.65354	3.48443	2.25641	1.6515	2.85477	3.8294	1.64728	2.64487	1.79232	0.59802	2.11726	2.02985	1.52977
b0548	ninE DLP12 prophage, conserved protein similar to phage 82 and lambda proteins	1.38027	1.54235	1.60877	1.01567	2.64005	1.05673	1.31062	LQ	0.889963	LQ	2.10663	LQ	1.37826	1.56776	1.0436	1.60761	1.22117	1.17359	LQ	1.89018	0.874698	LQ	3.69302	0.694059	1.67265	1.25407	1.33888	1.34412	1.29537	1.50845	1.40032	0.948773	1.75904	1.55427	0.594005	LQ	0.99622	0.92249	0.725215	1.20208	LQ	5.32237	0.984271	1.22775	LQ	1.86339	0.978194	3.68431
b0549	ybcO DLP12 prophage; predicted protein	0.87275	1.29757	1.26863	0.887727	0.821818	0.713605	0.987334	0.844201	LQ	1.23427	0.7614	1.35401	LQ	0.935388	1.37159	1.86469	0.752835	1.17523	1.36563	1.69856	1.97186	1.90795	2.13299	3.71322	0.666702	0.663343	0.931117	0.877798	3.03608	0.857235	1.06548	LQ	1.05236	2.47454	0.435471	0.693244	LQ	0.771193	LQ	1.37505	0.668231	1.84487	1.47963	1.40265	0.547768	1.00216	0.660942	0.769447
b0550	rusA endodeoxyribonuclease RUS (Holliday junction resolvase)	1.06526	1.79428	1.78029	1.12022	1.06977	1.44138	2.00271	0.724182	0.976051	1.10838	1.92454	1.00498	0.625045	1.08862	1.72736	1.3715	1.00457	2.22082	2.24119	1.84591	2.10166	2.01573	1.15723	1.42299	1.86723	1.53446	1.71262	1.76708	1.37962	1.51313	1.61892	1.42002	1.72595	2.24469	1.92171	2.16837	1.37063	1.05934	0.968949	1.64854	1.6416	1.47788	1.51596	1.36937	1.92962	0.992278	0.744541	2.27999
b0551	ybcQ Antitermination protein Q-like protein	3.03448	2.54352	3.22114	2.3473	3.46018	3.1438	2.8719	2.5212	2.27056	2.05925	3.66741	3.00976	1.70512	1.39899	2.44583	1.69097	3.94197	2.36245	2.26228	3.20718	3.16037	2.87133	4.12109	3.76051	3.36545	4.41676	3.89266	3.22585	3.97943	3.42267	3.94938	3.7402	3.00987	3.32542	6.80772	6.07196	3.1088	2.97115	2.11371	3.2824	5.08065	3.29089	3.44518	2.46196	3.32285	2.95665	3.60281	3.93564
b0552	insH-2 IS5 transposase and trans-activator	1.75081	1.67807	1.80274	1.4869	0.966676	1.18055	1.32656	1.07835	0.927399	1.16429	1.63508	0.852492	0.531746	0.631552	0.999536	1.4558	1.15266	2.5306	2.20812	1.46748	2.59435	2.27673	1.83444	1.53013	2.2364	1.39209	1.63957	1.526	0.901633	1.78866	1.96401	1.05452	2.11217	1.34114	1.5297	1.32856	0.992434	1.18158	1.00749	1.29124	1.4584	1.36804	1.88049	1.24136	1.84097	1.39856	1.2981	1.9394
b0553	nmpC outer membrane porin protein; locus of qsr prophage	5.92711	4.23281	5.64276	3.82476	6.18082	5.1302	3.69652	3.80149	3.21072	2.89607	2.62993	LQ	2.47936	1.73651	4.0188	6.16654	3.28034	3.07394	2.85157	5.21748	2.3668	4.13546	3.4931	3.67613	5.88156	5.39699	3.44637	3.17501	5.67269	5.30579	4.50381	4.52846	2.77452	2.82757	10.1022	8.62444	5.86077	5.93619	4.61237	3.70541	5.89329	4.23637	6.45104	3.8657	5.10406	3.24557	7.51681	4.51254
b0554	essD DLP12 prophage; predicted phage lysis protein	2.21562	1.52742	2.38341	1.81752	2.09893	2.18899	2.38277	2.09741	2.23087	2.08806	3.74122	2.18685	3.25072	1.97358	2.45392	2.42158	3.95544	1.80612	1.86662	2.32114	1.66447	1.46618	2.42591	1.51979	2.66268	1.56084	2.75319	1.36261	2.98801	1.96904	1.88156	1.67983	2.40192	2.82106	1.63014	1.53332	2.01786	1.56416	1.72485	1.7455	2.44302	3.41746	2.21031	2.11813	3.07164	5.31858	2.02271	3.64489
b0555	ybcS DLP12 prophage; lysozyme	5.81198	5.22153	5.45084	5.17508	6.61265	8.00068	5.6426	5.89077	3.31239	6.00666	4.60013	3.89331	1.70439	2.24877	4.75314	5.28691	5.41043	6.05529	5.11413	7.16145	8.0523	6.61597	4.00716	4.61354	3.73281	5.32156	5.59133	4.38866	5.18718	4.92889	4.83099	5.35505	12.74	6.64397	4.68993	4.13265	5.25873	5.09422	3.81008	6.07243	7.82783	5.89251	3.75929	5.27339	7.06522	12.2413	2.59098	5.11477
b0556	rzpD DLP12 prophage; predicted murein endopeptidase	3.70931	3.51582	3.89715	2.6242	2.74552	3.38264	2.74904	2.43744	2.29277	1.67506	1.69997	2.55711	0.856136	0.738363	2.76543	2.66599	2.91012	3.21711	2.90481	3.94329	1.16832	1.47163	2.68223	2.74481	4.48969	2.37532	2.13542	2.87856	2.84964	3.3321	3.25679	2.2946	2.52103	3.17899	1.65733	1.54263	4.18411	1.45927	2.97748	2.13398	5.21615	3.76568	2.07638	1.70468	0.789281	2.87299	1.54405	4.82594
b0557	borD bacteriophage lambda Bor protein homolog	2.71918	3.24602	3.73243	2.32582	4.32633	4.58143	4.63182	LQ	1.89525	LQ	2.0202	LQ	1.69029	0.979325	4.85599	4.48358	4.06415	3.17418	2.84058	3.92481	3.3253	3.02538	3.40215	2.22318	4.27204	4.32103	3.14655	2.76588	5.70411	4.20301	3.74175	2.64295	7.28619	3.87134	4.02863	3.02963	3.17518	2.78638	2.03382	3.03467	2.65526	6.21695	2.41588	4.89094	8.66467	3.83541	2.50254	3.31759
b0558	ybcV DLP12 prophage; predicted protein	2.2475	1.7592	2.26604	3.42273	3.82416	1.70526	0.898492	LQ	1.46972	LQ	1.19002	LQ	1.64336	1.1797	2.5236	3.0302	5.17605	2.65704	LQ	2.01468	5.64426	LQ	1.87625	2.59829	2.12049	2.52963	2.61007	LQ	1.66704	2.90843	LQ	2.39698	1.87232	1.74978	5.6355	LQ	1.36509	2.13088	2.56933	2.44831	2.53835	3.15373	1.37276	1.89554	1.85329	0.999706	2.94752	3.57817
b0560	nohB DLP12 prophage; DNA packaging protein	0.291517	0.467217	0.819302	0.681242	0.63466	0.425526	0.340798	0.480622	0.321366	0.621131	0.271667	0.945149	0.324247	0.254267	0.725414	0.413835	0.820309	0.679749	0.751126	0.882492	0.35915	0.555866	0.394983	1.22357	0.389451	0.625979	0.683801	0.417071	0.566483	0.332035	0.507093	0.59676	1.71713	0.67243	0.386607	0.579033	0.333971	0.277485	0.411634	1.15012	0.415613	0.563417	0.857848	0.502602	0.315928	0.503879	0.587091	0.427008
b0562	ybcY DLP12 prophage; predicted SAM-dependent methyltransferase	5.88778	2.76799	3.63232	3.36354	6.557	7.35036	2.18103	LQ	2.4419	LQ	3.13525	LQ	1.01386	0.895182	3.4412	1.39276	2.35127	2.67128	2.64315	2.593	3.74566	3.46586	2.55345	4.31164	2.49049	4.41687	1.69543	4.61265	3.00548	4.29762	4.1382	2.51717	3.88406	1.40188	7.29183	6.24148	4.24262	2.83335	2.74762	4.10192	6.91212	2.94244	4.3131	2.986	12.4238	1.15372	5.26549	2.85605
b0563	tfaX DLP12 prophage; predicted protein	2.58896	1.95835	2.16201	1.91178	2.61067	1.84067	1.87615	1.36347	1.33424	1.21027	1.83844	LQ	0.99136	1.09987	2.43256	1.75563	1.6626	0.781618	1.18518	1.69836	1.63097	1.30794	1.37176	1.81776	3.26523	1.80285	1.79213	1.42837	1.77644	2.24392	1.57045	1.62999	1.77876	1.73178	2.639	1.94062	2.97773	1.99301	2.15018	1.32946	1.35952	2.80438	2.23865	2.2043	4.08406	0.868751	2.02107	1.63191
b0565	ompT outer membrane protease VII (outer membrane protein 3b)	8.14615	5.64287	5.58441	4.91216	6.09663	7.79163	4.67612	4.76423	5.12332	5.83675	5.7122	10.4159	9.11593	3.66338	4.09316	1.78657	3.89637	3.11643	2.80292	7.3814	6.57293	7.60123	3.51784	8.07082	9.47494	4.99084	3.779	7.27004	5.31538	6.92632	7.00074	11.374	9.03014	3.15916	10.2898	11.6127	11.6122	6.30016	7.861	10.0824	11.6069	4.46736	6.90741	4.06523	9.51127	5.8532	9.22647	10.1774
b0566	envY EnvY transcriptional activator	3.15692	2.35442	2.50561	2.92478	3.55054	2.48162	3.10727	2.99886	1.38758	1.20507	0.392554	2.00031	0.41451	1.3295	2.09155	1.63834	1.8191	1.89211	1.66892	1.83445	1.86581	1.44766	2.40983	0.31243	3.09737	2.91538	2.00139	2.88965	3.90425	3.11587	2.57261	2.78189	4.48802	2.55546	3.92187	3.15128	3.37855	3.50484	2.97956	2.23706	2.57121	1.85242	1.96388	2.79358	9.23278	0.849997	2.42243	2.75578
b0568	nfrA bacteriophage N4 receptor, outer membrane protein	0.363769	0.684688	0.514388	0.55847	0.408198	0.41273	0.596146	0.649413	0.711901	0.773943	0.428776	0.518209	0.343674	1.08347	1.07323	0.599057	0.876581	0.550994	0.543347	0.692148	0.706741	0.864223	0.467847	0.344262	0.71927	0.123016	1.04411	0.748664	0.742636	0.405749	0.452494	0.60534	0.599712	0.60615	0.349335	0.490239	0.461251	0.783224	0.597803	0.84822	0.455816	0.91305	0.249403	0.815698	0.735532	0.369731	0.324615	0.506515
b0569	nfrB bacteriophage N4 receptor, inner membrane subunit	0.846161	1.20638	1.16659	0.736795	0.37143	0.934888	0.757582	1.03188	1.47801	0.59714	0.947301	1.24988	0.300059	0.595898	1.4017	2.02379	0.898647	1.14705	1.09086	1.09425	2.00527	2.10574	1.06565	0.906654	0.585952	0.35467	1.16544	1.17695	1.39654	0.659862	0.665941	0.946977	1.07257	0.777623	0.563139	0.674401	1.172	1.06315	1.55364	0.99665	0.594222	1.18387	1.42792	1.54067	1.40034	0.793951	0.627801	1.87728
b0570	cusS putative 2-component sensor protein	0.341054	0.513776	0.660549	0.540322	0.150384	1.11494	1.22195	0.638637	0.596827	LQ	0.403809	LQ	0.349064	0.299461	0.720161	0.982658	0.308314	0.478656	LQ	0.304199	0.126116	LQ	0.262901	0.385538	0.697863	0.340377	0.672351	1.07326	0.425646	0.34276	LQ	0.692143	0.804032	1.34076	0.246746	LQ	0.710925	1.9103	1.56505	0.57113	0.0988064	0.435467	0.402647	0.64381	0.461399	0.574638	0.962163	1.57605
b0571	cusR CusR transcriptional activator	0.226039	0.835476	0.274004	0.700264	0.153701	0.342956	0.660035	LQ	0.966979	1.44039	0.423885	LQ	0.187702	0.549336	1.50253	4.36784	0.508737	0.647574	0.924902	0.59435	0.361697	0.630423	0.491237	0.528601	0.330903	1.49423	1.28549	0.381509	0.990766	0.371989	0.48486	0.712269	2.16045	0.933719	1.22986	1.40318	0.881274	1.05918	0.296332	1.44813	0.334882	2.15115	0.293749	0.435721	0.233392	1.19785	0.948979	1.15716
b0572	cusC outer membrane factor of the CusCFBA copper efflux system	1.80601	2.88202	2.84344	3.05031	2.14996	2.4818	1.96889	2.94595	2.71457	1.93809	2.31569	2.1042	1.29936	0.807811	4.56779	2.01382	4.28085	3.39146	2.98867	3.35833	2.4111	2.36007	2.93636	3.6302	1.2554	2.50956	3.13881	2.62113	3.1472	2.46699	2.30119	2.81317	2.92374	1.85766	1.45931	1.28227	2.90387	3.03196	6.14969	2.38211	6.36943	2.04051	1.99515	3.96887	6.1702	4.06688	2.62176	1.57246
b0573	cusF periplasmic copper-binding protein	3.92058	3.82601	4.71287	4.31518	3.47407	4.44586	4.98708	4.0589	4.23111	3.07223	10.1151	LQ	3.66843	1.52957	6.83021	3.34167	5.9556	4.59238	3.41728	4.94311	9.65197	7.34851	3.94997	6.64701	4.77024	3.36004	5.70088	4.59047	3.22749	2.98114	2.84746	4.54092	3.82052	3.96047	2.591	2.13981	3.07376	3.94239	4.22748	6.69161	6.61939	4.97777	4.74531	6.21514	2.87832	7.94403	2.37072	6.93911
b0574	cusB membrane fusion protein of the CusCFBA copper efflux system	0.976616	1.15352	1.15632	1.11651	0.933699	0.887426	1.46216	1.02387	1.15836	1.17513	0.884015	0.868349	1.08936	1.00652	1.63442	1.35897	1.18542	1.27997	1.22472	1.15828	1.33333	1.38234	1.11157	0.767877	0.776685	0.904343	1.23848	1.32768	1.07089	0.93383	1.0452	1.23978	1.23636	1.30202	0.826781	0.918812	1.20901	0.963964	0.964853	1.02551	1.40385	1.49355	0.816577	1.33041	0.603399	1.30118	0.840257	1.76372
b0575	cusA YbdE	0.847726	0.817101	0.804238	0.72158	0.717936	0.52518	0.586388	0.876118	0.574256	0.671292	0.398336	0.495319	0.222981	0.717836	0.89513	1.0811	0.505572	0.933146	0.968992	0.570265	0.60079	0.714536	1.07392	0.598302	0.463968	0.370298	1.31652	0.750248	1.04084	0.715618	0.694066	0.647991	0.715656	1.04353	0.253199	0.359375	0.518229	1.47699	0.555022	0.619362	0.638145	1.06757	0.277377	1.26651	0.363567	0.741137	0.357584	0.645116
b0576	pheP PheP phenylalanine APC transporter	1.02623	1.77546	1.8192	1.63147	1.19362	1.69686	1.1111	1.53521	1.58186	1.9609	0.16829	1.67578	0.491331	0.567056	1.34607	1.66425	1.60501	2.79108	2.76977	1.70203	1.22831	1.41758	2.49548	0.673801	1.68828	1.45513	1.81071	2.88477	1.31881	1.17738	1.30271	1.51012	0.620575	2.08693	1.58146	2.02134	1.21039	2.90684	3.01115	1.37449	1.83675	0.864406	2.84441	0.803329	2.11605	1.31955	0.430196	0.979823
b0577	ybdG predicted mechanosensitive channel	11.3088	8.22613	7.98223	8.80956	15.7138	9.93532	7.04028	7.13149	6.57656	4.63586	4.03649	8.97707	2.61767	2.02629	11.2092	11.2511	8.43646	7.3272	7.66383	7.15582	11.06	10.4539	9.42212	4.88063	15.0689	8.7169	7.7293	6.32413	9.28435	8.73773	8.56124	6.76005	9.44077	4.70653	12.0112	10.6539	11.805	10.7003	9.29564	7.36467	13.1724	4.80793	8.75214	9.87779	10.8379	5.53475	10.6302	4.8683
b0578	nfsB NfnB	1.69781	1.48348	2.11054	1.44986	2.16515	1.37742	1.18902	1.45064	1.22711	2.44534	0.744352	1.29858	0.80525	1.61222	2.25048	0.717221	1.63181	1.35949	1.38877	1.48741	1.80005	2.52834	0.842369	0.598135	1.20645	1.48307	1.70371	3.31097	1.37979	1.21903	1.21001	2.85965	2.92964	1.07857	0.574422	0.785801	1.48212	2.96003	1.0732	1.5765	2.16407	1.35022	2.31479	1.81229	2.61495	4.56119	1.35677	4.16106
b0579	ybdF conserved protein	1.42989	0.982119	0.854142	0.736303	0.466447	0.880846	0.885552	0.871727	0.945101	LQ	0.427962	LQ	1.02722	0.71066	0.954514	0.719825	1.12112	0.583978	0.743143	1.08289	1.2369	1.17691	1.68455	0.543437	0.866454	1.25208	1.46777	1.34584	1.11767	1.56582	1.39657	1.5282	1.80795	1.00871	0.376403	LQ	0.901237	2.54436	0.642513	1.69231	0.580562	1.55981	1.73103	0.844456	0.489845	2.85686	0.800892	2.03556
b0580	ybdJ predicted inner membrane protein	0.748973	0.851995	0.64754	0.737866	0.877109	0.892745	0.505873	LQ	0.514539	LQ	0.57362	LQ	0.657461	0.686242	0.839435	1.05173	0.700532	0.65488	0.726882	0.705895	1.00197	0.937921	1.19254	1.16597	0.494611	0.992976	0.913674	0.678385	1.08453	0.819167	0.812309	0.600099	1.01628	1.04501	0.430614	0.49916	0.599681	1.32245	0.835302	0.746425	0.564155	1.26853	1.63059	1.44192	0.525571	0.816422	0.694854	0.626722
b0581	ybdK gamma;-glutamyl:cysteine ligase YbdK	1.91363	1.44803	0.404012	1.69048	0.180933	1.442	0.933141	0.998796	0.730877	0.770385	0.564946	0.963016	0.451092	0.286939	0.971978	0.311227	1.00119	0.645943	0.655971	0.715851	1.38583	1.20538	1.06525	0.656454	0.674189	1.94953	0.647433	1.65003	1.32775	1.22985	1.21507	0.848565	0.842756	0.926129	0.324594	0.384428	1.12296	1.93025	1.91747	1.11012	0.346478	0.502279	2.23975	0.71433	1.07606	0.862643	1.22261	0.45973
b0582	insL-2 IS186/IS421 transposase	1.06254	1.01423	0.973755	1.02183	0.65762	0.938817	0.960936	1.25086	0.851959	1.43103	0.888287	0.963922	0.966154	0.522539	1.11916	0.420378	1.09541	0.930337	0.887876	1.19666	0.701648	0.67793	0.289025	1.26324	1.75661	1.06236	1.49001	0.987842	0.925427	0.951712	0.9691	0.827847	1.45025	0.803531	0.432585	0.358333	0.678213	0.711396	0.681537	1.15001	1.3684	0.841633	0.91675	1.123	0.376658	2.24309	0.768611	1.19236
b0583	entD phosphopantetheinyl transferase	1.95531	1.34413	0.666337	0.55218	1.62253	1.73217	1.99787	1.23839	1.99726	0.824803	1.37799	1.41734	0.718123	LQ	1.25146	1.65644	0.81142	1.38711	1.22717	1.00236	0.537501	0.60926	0.981891	4.51235	3.85172	1.24519	1.39685	1.3927	2.00703	2.98758	2.40988	0.957634	2.39835	1.81315	0.231596	0.246723	1.38449	1.94094	1.54206	1.95193	0.437473	1.52672	1.29444	0.787576	0.240688	2.25002	5.28295	3.5949
b0584	fepA FepA, outer membrane receptor for ferric enterobactin (enterochelin) and colicins B and D	0.802581	0.570699	0.54394	0.466773	0.468992	0.426928	0.0976255	0.35025	0.308747	0.288803	0.105333	0.257054	0.106727	0.553205	0.26804	0.580589	0.314283	0.392714	0.35128	0.186568	0.245321	0.203043	0.378794	0.165608	0.108595	0.361342	0.934646	0.50516	0.638587	0.36499	0.369712	0.321321	0.408755	0.552805	0.20303	LQ	0.346703	0.525371	0.41114	0.346185	0.113575	0.456214	0.221974	0.67238	0.123978	1.04553	0.391357	0.106978
b0585	fes enterochelin esterase	0.345996	0.428796	0.165249	0.394551	0.134713	0.109895	0.113205	0.208366	0.39856	0.242489	0.0775466	0.497927	0.143843	0.22036	0.337364	1.15204	0.370547	0.333631	0.271565	0.0863116	0.655882	0.690683	0.25832	0.748905	0.100854	0.0925332	0.662136	0.722384	1.02999	0.506163	0.48925	0.504229	0.201463	0.238737	0.177562	0.0942613	0.286375	0.815481	0.890489	0.310363	0.0676454	0.694176	0.091069	0.642358	0.0928276	0.593372	0.463005	0.0993282
b0586	entF serine activating enzyme	0.438899	0.519566	0.888178	0.527545	0.452306	0.537806	0.369356	0.355102	0.39474	0.504435	0.135914	0.881038	0.169349	0.57327	0.536825	0.637792	0.415939	0.598548	0.628354	0.210549	0.547567	0.717308	0.532741	0.941673	0.232966	0.314402	0.685784	0.654458	0.784097	0.394139	0.535059	0.343606	0.411779	0.68295	0.444605	0.632008	0.381359	0.77544	0.440037	0.754181	0.655382	0.565304	0.296306	0.461189	0.345091	0.540902	0.298045	0.8059
b0587	fepE ferric enterobactin (enterochelin) transport	5.37455	4.60273	4.68034	5.18569	8.06569	5.68153	3.43263	2.99565	3.67156	1.57216	1.08454	4.28664	1.05499	1.51721	5.59785	6.27846	3.13688	3.21319	2.79774	3.3614	6.25683	6.40992	3.16613	4.3539	3.56722	7.8707	1.91536	4.45234	4.61371	5.1547	5.14214	4.19253	2.69388	2.78658	8.71719	7.06569	8.53917	8.48391	8.06328	3.1517	6.13082	2.44663	9.55416	3.87758	12.2463	1.92658	6.69949	5.48356
b0588	fepC Ferric Enterobactin Transport System	0.381013	0.667833	0.388878	0.827193	0.741903	0.273402	0.331734	0.512438	0.430588	0.522951	0.255406	0.822362	0.163104	0.40754	0.512284	0.54315	0.406813	0.581057	0.728155	0.37868	0.537903	0.681903	0.397509	0.217913	0.292976	0.496749	0.498518	0.323075	0.418515	0.335088	0.493888	0.426223	0.452158	0.46523	0.347508	0.566829	0.274259	1.16466	0.563319	0.355875	2.76345	0.595806	0.21842	0.430484	0.365321	0.276683	0.420769	0.472131
b0589	fepG Ferric Enterobactin Transport System	0.132059	0.229858	0.175614	0.254068	0.1247	0.111686	0.196094	0.219431	0.178066	0.270708	0.243903	0.223727	0.0638136	0.403706	0.309336	0.296622	0.236641	0.235128	0.236473	0.139806	0.165642	0.209329	0.228906	0.0952904	0.101455	0.114092	0.27562	0.121988	0.228278	0.122026	0.15876	0.110335	0.258402	0.265702	0.13242	0.156389	0.0818974	0.150681	0.437239	0.10862	0.113976	0.378986	0.0881792	0.263427	0.112652	0.12446	0.159319	0.136781
b0590	fepD Ferric Enterobactin Transport System	0.0998263	0.161251	0.112658	0.253136	0.0783343	0.0832254	0.132148	0.17242	0.265312	0.246394	0.127583	0.177822	0.0574829	0.237673	0.258953	0.261218	0.198051	0.202701	0.215678	0.115871	0.137175	0.149598	0.208636	0.065057	0.0847461	0.0827603	0.242735	0.341233	0.195269	0.131022	0.0910649	0.0950486	0.21301	0.228213	0.267984	0.163549	0.228355	0.0959898	0.0553296	0.0905185	0.0573547	LQ	0.0557827	0.239207	0.0681291	0.147161	0.124243	0.152312
b0591	entS EntS MFS transporter	0.48425	0.593295	1.11196	0.92446	0.132675	0.19858	0.255789	0.169765	0.256577	0.239223	0.156471	0.595757	0.12746	0.179464	0.496752	0.289873	0.599449	0.387534	0.338258	0.29212	0.17925	0.121387	1.13541	0.0816502	0.531884	0.536468	0.930564	0.513202	0.614843	0.135749	0.118463	0.443717	0.446035	0.836013	0.116167	0.0737628	0.208359	0.22926	0.651584	0.544739	0.0683025	0.442274	0.0686501	0.482594	0.111416	0.460612	0.169072	1.11922
b0592	fepB Ferric Enterobactin Transport System	0.4955	0.231502	0.217713	0.278104	0.430381	0.323696	0.184541	0.226579	0.276959	0.241293	0.0921064	0.687953	0.133511	0.465803	0.35083	0.42943	0.52349	0.212993	0.261358	0.136522	0.161105	0.17627	0.308369	0.0872365	0.119627	0.120699	0.373752	0.181731	0.367909	0.192134	0.234314	0.30077	0.67061	0.586064	0.120594	0.0988788	0.218639	0.150793	0.117194	0.200188	0.0772412	0.421449	0.111758	0.364808	0.172146	0.351044	0.167882	0.284122
b0593	entC isochorismate synthase 1	0.237755	0.425369	0.338043	0.560439	0.160231	0.163089	0.186451	0.161845	0.457262	0.630375	0.0764331	0.511999	0.403505	LQ	0.233392	0.381465	0.297777	0.566424	0.514865	0.203849	0.15327	0.179932	0.316371	0.103122	0.159211	0.168868	0.596477	0.311555	0.409397	0.400087	0.421501	0.215621	0.296222	0.652458	0.149296	0.113635	0.213101	0.213588	0.546603	0.331853	0.0948353	0.708597	0.225128	0.71913	1.42449	0.871602	0.214241	1.10982
b0594	entE enterobactin synthase multienzyme complex	0.102863	0.310675	0.159893	0.30299	0.167364	0.222547	0.267516	0.365297	0.384327	0.58304	0.218021	0.509269	0.282295	0.879235	0.517656	0.0707094	0.416364	0.362008	0.366029	0.336131	0.363358	0.441918	0.454235	0.128348	0.586654	0.222628	0.419911	0.275178	0.364927	0.439355	0.548567	0.235101	0.192614	0.329251	0.218248	0.298926	0.125936	0.196078	0.173016	0.474868	0.566029	LQ	0.109082	0.148655	0.0435492	0.100668	0.0668408	0.316137
b0595	entB apo-EntB	0.328623	0.46497	0.776725	0.471425	0.177391	0.241368	0.392729	0.536058	0.53506	0.836995	4.3454	0.276909	0.343236	0.767465	0.409788	0.483706	0.424785	0.555952	0.547774	0.191456	0.831674	0.865504	0.397282	0.169306	0.204739	0.450458	0.716864	0.606477	0.644718	0.417471	0.485446	0.23184	0.454723	0.41999	0.148403	0.179153	0.152892	0.326104	0.111976	0.263301	0.152723	0.608786	0.156373	0.427729	0.192143	0.182274	0.248029	1.30643
b0596	entA 2,3-dihydro-2,3-dihydroxybenzoate dehydrogenase	0.938606	1.03121	1.04259	0.979767	0.144944	0.58204	1.11031	0.551156	1.30497	0.453343	0.304884	0.624512	0.228193	1.16848	1.20004	0.745593	0.487688	0.839465	1.01434	0.44141	0.744031	0.81727	1.28238	0.108564	0.448314	0.143319	0.791983	0.341323	1.24151	0.788677	0.930646	0.826939	0.808831	0.597285	0.111297	0.151895	0.8774	0.538764	1.21633	0.296063	0.112178	0.580398	0.0826889	0.391717	0.262945	0.237162	0.831804	1.16523
b0597	entH thioesterase	0.962344	1.14152	1.22662	0.891891	0.326418	0.559657	0.75921	0.651093	LQ	0.940459	0.356826	1.69114	LQ	1.47944	0.656211	0.703185	1.36775	0.847352	0.988923	1.15542	0.281445	0.564946	1.38056	0.907381	1.34299	0.907911	1.31744	0.452518	0.927671	1.01775	1.11933	0.764146	0.646267	1.819	1.22722	1.20954	0.896473	0.620126	1.05148	0.893345	0.320085	1.0236	0.264028	1.97014	0.362298	0.831793	1.21992	1.37461
b0598	cstA peptide transporter induced by carbon starvation	1.04939	1.39155	0.897102	0.924949	1.10506	0.28819	1.13548	0.83398	0.712708	0.835265	0.484033	LQ	0.297317	1.15652	1.08388	0.859871	0.841008	0.986526	1.24482	0.388854	0.746285	0.815973	1.65509	0.182508	0.677634	0.342932	1.86098	1.15717	1.29275	0.432929	0.487257	0.650944	0.918646	1.2525	0.438493	0.475484	0.6235	1.15327	0.424085	0.664359	0.183886	1.32366	0.690681	1.28196	0.753319	0.537284	0.706879	0.99197
b0599	ybdH predicted oxidoreductase	0.560669	1.08568	0.628415	0.469393	0.287547	0.403548	0.614097	0.478588	0.83191	0.657846	1.12217	0.41144	0.737948	0.582238	0.798201	1.6764	0.891969	1.05613	1.11446	0.84917	0.301872	0.391782	0.437631	0.206128	0.292127	0.372783	1.00835	0.724234	1.26033	0.51764	0.603281	0.730462	0.570351	1.35248	0.228887	0.264203	0.62866	0.350818	0.974266	0.59582	0.400542	1.38646	0.212223	1.19178	0.195166	1.4101	0.369285	1.10408
b0600	ybdL methionine aminotransferase, PLP-dependent	0.547744	1.2858	0.715017	1.42992	0.321626	0.430287	0.636351	0.623755	0.977299	0.592294	0.193892	0.368638	0.415951	0.40962	1.19627	0.818708	0.904638	0.553444	0.598147	0.81796	1.2806	1.62133	1.74175	0.883426	0.948242	0.262667	1.18362	0.424833	0.551059	0.790315	0.898006	0.59471	0.669083	0.909366	0.185444	0.243288	0.50249	0.521605	0.78556	1.06032	0.375647	1.42991	0.483589	1.89509	0.14559	1.05835	0.336529	0.811997
b0601	ybdM conserved protein	1.29589	2.00304	1.83547	2.91825	1.05115	0.673966	0.594509	1.27694	1.42391	1.98273	0.305888	0.911319	0.600404	1.00341	2.48307	1.5016	2.26656	1.98812	1.94649	1.58948	7.80716	7.30553	1.25019	2.87895	0.895619	2.27904	1.23806	3.43893	0.966635	1.68643	1.59248	1.77096	2.7547	1.50321	4.86113	4.97326	1.42462	2.77036	1.33439	1.27863	1.09173	1.49285	3.19558	0.926094	0.415034	1.95361	0.556289	1.40279
b0603	ybdO predicted DNA-binding transcriptional regulator LYSR-type	7.77307	5.26914	6.66446	5.2851	14.0215	8.22622	1.77884	LQ	2.83982	LQ	0.684383	LQ	1.64603	0.5178	5.14201	1.73821	2.65535	3.27276	LQ	2.73847	9.66766	LQ	2.77847	3.53448	2.4545	8.87459	1.58792	4.25227	2.86208	6.53938	8.31737	4.98851	2.40838	2.44758	13.0834	12.2104	10.6918	6.1873	6.69873	5.24092	0.569223	2.26674	LQ	2.88116	11.9823	1.33462	12.9143	3.20669
b0604	dsbG DsbG oxidized	1.95933	1.14502	1.39441	1.66868	1.98901	0.978722	0.797314	1.27203	0.701655	1.49736	3.2676	2.35483	1.28158	0.433554	2.12908	1.45779	1.79581	1.22217	1.30675	1.41197	0.461842	0.652625	2.5215	0.576773	1.96407	0.856614	1.73027	1.48613	1.55695	1.68407	1.80776	2.75113	1.17336	1.3722	1.65122	2.70943	1.75378	1.17459	1.09712	1.88381	0.9651	0.900039	1.64311	1.1842	1.31578	1.973	2.08739	1.4812
b0605	ahpC AhpC component	0.662176	0.508437	0.488523	0.584756	0.3856	0.48268	0.198542	0.359569	0.328869	0.550781	0.355519	0.516333	0.684559	1.08728	0.348248	0.450207	0.393934	0.524672	0.558026	0.416217	0.321998	0.420775	0.478201	0.244239	0.980629	0.455746	0.637107	0.447614	0.553486	0.526294	0.583308	0.569066	0.460793	0.748947	0.187717	0.265015	0.675319	0.303234	0.192055	0.750822	0.224946	0.571334	2.04138	0.447728	0.270204	0.590768	1.58034	0.768297
b0606	ahpF AhpF component	0.440507	0.514533	0.425287	0.635954	0.601043	0.36423	0.29047	0.568939	0.360845	0.688383	0.524809	0.307684	0.292195	0.427167	0.680979	0.798194	0.619964	0.541992	0.574262	0.816244	1.3701	1.55092	0.670735	0.218279	0.824777	0.752152	0.993702	0.278275	0.461422	0.456626	0.453073	0.414396	0.371036	0.50667	0.351234	0.38525	0.41712	0.303792	0.537776	0.63191	0.152483	1.02183	0.253626	0.46558	0.701962	0.675949	0.405811	1.23594
b0607	uspG universal stress protein UP12	0.952783	1.15418	1.19986	1.42811	0.933284	0.920088	1.18496	LQ	1.35747	LQ	0.329323	LQ	1.00009	1.23877	2.02278	1.28752	1.81351	1.20876	1.25984	1.34653	1.45496	LQ	1.67708	1.38612	1.3485	0.968365	1.57971	1.29981	1.48218	0.987081	1.04703	3.53206	1.46861	1.24174	1.64497	1.53708	1.00637	0.839304	1.38263	1.23146	1.16545	1.50773	1.48255	1.37848	0.870474	2.43984	0.968924	2.53066
b0608	ybdR predicted oxidoreductase, Zn-dependent and NAD(P)-binding	1.12742	1.52289	1.46906	1.25773	1.23114	1.09972	2.10877	1.34189	1.17454	1.39514	0.124624	0.271354	0.680694	1.82945	2.23229	0.451407	1.65594	1.46194	1.16346	1.20798	0.647219	0.483483	0.736673	1.15395	1.11746	1.35344	1.8884	2.8483	1.75107	1.59392	1.3687	1.89058	1.52651	1.22002	0.321413	0.306232	1.76595	1.32755	2.2864	2.531	0.906874	1.60647	1.13653	1.22438	0.953688	1.38781	0.91497	0.987826
b0609	b0609	0.511493	0.884346	0.605426	1.10387	0.352133	0.487571	0.426744	0.879828	0.716426	1.17219	0.353015	LQ	0.843851	0.601949	1.65293	0.744893	1.57503	1.03329	0.934074	0.831422	0.744516	0.784674	0.52152	0.39059	0.427314	1.54098	1.19338	0.978224	1.15721	0.885443	0.924396	0.969965	0.744542	0.992427	0.264642	0.358306	0.552597	0.593237	0.474269	1.57804	0.327763	1.01815	0.477171	0.742396	0.460681	2.20132	0.597966	0.435539
b0610	rnk regulator of nucleoside diphosphate kinase	0.176393	0.72622	0.444175	1.13778	0.0715444	0.356681	0.556016	0.436244	1.33087	0.903622	0.2944	0.250357	1.09564	0.429943	1.25233	0.747579	1.82495	0.450808	0.445552	1.054	0.395869	0.399805	0.0619917	0.0560578	0.279604	0.770728	1.28899	0.335053	0.836972	0.712564	0.797321	0.944166	0.200598	0.376252	0.0640191	0.0871883	0.449834	1.12466	0.44824	1.04279	0.0322034	0.350121	0.671935	0.339988	0.166177	0.749187	0.568669	0.327781
b0611	rna RNase I, cleaves phosphodiester bond between any two nucleotides	0.407766	0.657121	0.769456	0.549362	0.324386	0.363457	0.534453	0.342782	0.630799	1.13892	1.20317	0.64544	0.454153	0.75977	0.677302	0.59546	0.539809	0.772869	0.862067	0.966802	0.448541	0.471122	0.667625	0.489414	0.317047	0.577803	0.681087	0.368977	0.551655	0.658691	0.739752	0.49246	1.45957	0.993719	0.649873	0.821012	0.711762	0.502401	0.572444	0.784213	0.321285	0.729394	0.571955	0.542351	0.309726	1.08358	0.72861	1.31583
b0613	citG triphosphoribosyl-dephospho-CoA synthase	0.913696	1.11684	0.946595	1.3177	1.81092	1.19643	1.24832	0.817612	1.04349	0.912627	1.19345	0.835352	0.438072	0.877011	1.09362	2.72374	0.974944	0.789645	0.744957	0.798757	0.339038	0.416565	2.09845	1.20286	3.129	1.12928	0.873108	1.03417	1.23774	0.627646	0.648965	0.50965	1.56543	0.958603	0.234024	0.260415	1.16503	1.19906	0.97248	0.387499	1.2635	1.0628	1.82068	1.26393	0.290443	1.52308	0.939402	0.684777
b0614	citX apo-citrate lyase phosphoribosyl-dephospho-CoA transferase	0.539963	0.795515	0.677915	0.426641	0.513125	0.424832	1.62372	0.541781	0.92565	0.658498	0.33156	0.766583	0.280654	0.756763	1.00377	0.854395	0.841293	0.667882	0.608376	0.68367	0.273917	0.364739	0.665579	2.77722	1.71274	0.696882	0.753921	0.423213	1.39303	0.857648	0.875753	0.517196	0.901681	0.661449	0.206969	0.271855	0.956488	0.729449	0.751866	0.641529	0.360496	1.35096	0.425439	0.926344	0.24598	1.64043	1.03189	0.47571
b0615	citF citrate lyase, citrate-ACP transferase alpha; subunit	0.499513	0.682495	1.2312	0.45647	0.219611	0.440052	0.915553	0.577343	0.421172	0.657977	0.185152	0.368795	0.216436	0.3709	0.833499	0.547893	0.535714	0.508057	0.494518	0.968277	0.868395	0.75744	0.337884	0.151719	0.849808	0.297111	0.651537	0.942635	0.945292	0.298099	0.330106	0.449908	0.477488	0.355716	0.880114	1.12768	0.357734	1.29031	0.483159	0.369043	0.521421	0.615766	0.351754	0.296314	0.160954	0.486079	0.158843	0.647661
b0616	citE citrate lyase, citryl-ACP lyase beta; subunit	0.162692	0.474028	0.592589	0.470843	0.571837	0.20099	0.557597	0.293069	0.304618	0.476059	0.922655	0.363413	0.244024	0.225927	0.608061	0.251824	0.450817	0.446428	0.486686	0.705868	0.159956	0.239715	0.17842	0.553931	1.36456	0.326477	0.798245	0.272398	0.313201	0.472761	0.533577	0.534664	0.204866	0.374373	0.0906706	0.127542	0.415023	0.39054	0.998084	0.454906	0.115786	0.869891	0.167463	0.663848	0.155571	0.845858	0.253652	0.426266
b0617	citD citrate lyase, acyl carrier gamma; subunit	0.787469	0.650639	0.601466	0.602465	0.304959	0.391878	0.414278	0.340868	0.598946	LQ	0.48179	LQ	0.265464	0.640407	0.735373	0.919188	0.99627	0.706858	0.594475	0.61819	0.542814	0.446782	0.675063	0.483845	0.4511	0.350784	1.02324	0.495441	0.80241	0.702691	LQ	0.495811	0.715668	0.765336	0.231783	LQ	0.424638	0.50071	0.754937	0.649994	0.273081	1.02575	0.332019	1.39129	0.358996	1.03218	0.399058	0.394524
b0618	citC citrate lyase synthetase	1.17581	1.58487	1.49623	1.70071	0.72139	1.39936	0.765126	0.66901	1.28853	0.692999	0.709355	1.15567	0.67649	0.200396	2.14339	1.92901	1.04686	2.06236	1.93483	1.01855	1.33475	1.55578	1.35018	1.1461	0.989366	1.84678	1.84061	0.979448	0.750362	1.76492	1.56287	1.48374	0.592295	1.66376	0.913562	0.731779	1.30257	1.38952	0.941893	1.77449	1.96929	1.13282	1.41313	1.44613	2.26002	0.789537	1.47219	2.1246
b0619	dpiB sensory histidine kinase in two-component regulatory system with DpiA	1.11729	1.64473	1.66228	1.62069	1.42161	1.92175	0.903949	0.723844	0.840633	1.6389	0.677684	0.850675	0.378636	0.459808	1.13389	0.55495	1.33427	1.31596	1.25426	1.41952	2.05376	1.88826	0.936364	1.3879	0.537913	1.97017	2.05816	1.49433	2.43178	2.04665	2.03857	0.939717	1.0137	2.34502	0.768683	0.533223	1.36216	1.66964	1.1469	1.81507	0.746262	1.40485	0.797131	2.29182	1.0879	2.65869	1.8528	0.800477
b0620	dpiA DNA-binding response regulator in two-component regulatory system with DpiB	0.427972	1.48846	1.17838	2.33069	1.3301	1.29929	2.34186	0.371856	1.147	LQ	1.09231	LQ	1.33729	1.65591	1.75336	0.386091	1.74288	2.21996	2.36281	1.66544	2.98565	3.11876	3.71549	0.729198	0.45094	1.12107	1.76505	0.551189	0.569561	0.981927	1.29225	1.78405	2.35887	1.82182	0.135611	LQ	0.838491	0.461568	1.26653	2.67794	2.09734	1.47224	LQ	1.54595	0.215443	1.004	0.533497	5.7509
b0621	dcuC DcuC dicarboxylate transporter	1.16655	1.148	1.29771	1.17707	1.78346	1.12321	1.38036	1.02831	0.768106	1.118	0.421686	1.55253	1.12421	0.466739	1.65223	1.55521	1.39095	1.81417	1.46844	1.21548	2.6381	2.65847	1.77729	4.71366	1.33595	2.20488	0.773334	0.961539	1.92548	1.26142	1.53145	1.43326	1.86372	1.98798	1.70774	1.76801	1.49525	0.972104	1.20741	1.18714	2.04028	1.16765	1.50091	0.868835	2.72371	1.15067	1.6724	1.47532
b0622	pagP PagP monomer	3.40745	2.38456	2.77866	2.4612	2.02786	3.12094	1.64963	1.48774	1.58796	2.6757	0.406876	3.2859	1.17714	0.694498	2.25425	1.81469	2.3087	1.84847	1.53571	1.97813	1.99209	1.75504	1.56829	5.77546	2.48475	4.74669	3.28938	3.20178	2.76666	3.28529	2.907	4.08273	3.21773	1.53649	9.82229	8.51208	3.11233	2.3627	3.23907	4.77068	5.64592	2.60163	1.92394	2.41661	3.62647	1.87434	2.23696	2.61345
b0623	cspE transcription antiterminator and regulator of RNA stability	0.892516	0.846628	0.837946	0.871211	0.530497	0.61982	0.716939	0.925553	0.793113	0.853218	0.522591	LQ	0.891306	0.983248	0.611091	1.2641	0.554749	0.834568	0.983958	0.61186	0.764771	0.833267	1.24237	0.658695	0.569853	0.614592	1.14314	0.659097	1.12622	0.780601	0.860255	0.707571	1.2011	1.30691	0.515842	LQ	0.618065	0.824784	0.865514	0.771166	0.607427	1.63701	0.584296	1.12106	0.591002	0.674625	0.712215	0.673394
b0624	crcB protein involved in resistance to camphor-induced chromosome decondensation	1.85462	0.663333	0.824902	0.734616	0.38089	1.17777	0.470836	0.613562	0.579312	0.930118	0.401174	LQ	0.744585	0.680558	0.867996	1.41368	0.765766	0.702311	0.810338	0.50616	0.444139	0.63681	1.17753	0.982847	0.493666	0.574293	0.6307	0.933913	0.737943	0.755507	0.840548	1.09014	1.61523	1.27274	0.308412	0.489152	0.619446	1.96286	0.883749	0.505132	0.406524	1.10438	1.3597	0.642086	0.430374	0.455384	1.70342	0.480538
b0625	ybeH predicted protein	0.767054	0.707163	0.764133	0.721177	0.515949	0.655827	0.63043	0.684184	0.554322	LQ	0.492114	LQ	0.775337	0.771933	1.08477	1.53293	0.892713	0.708121	0.683013	0.574098	0.782828	0.769128	0.760983	0.511812	0.434302	0.848836	0.906253	0.822745	0.999354	0.742647	0.807311	0.86098	0.993403	1.1182	0.391222	0.538183	0.480316	0.860563	0.395183	1.03112	0.578846	1.24612	0.903736	0.794547	0.554784	0.749444	0.781785	0.846971
b0626	ybeM predicted C-N hydrolase superfamily, NAD(P)-binding amidase/nitrilase	0.95201	0.56269	0.620285	0.384992	0.30154	0.417164	0.797675	0.445198	0.514302	0.548326	0.37613	0.401109	0.273632	0.503642	0.804489	0.672964	0.583404	0.503897	0.44614	0.344636	0.742176	0.736705	0.524426	0.175114	0.42811	0.48471	0.728414	0.561013	0.870681	0.562822	0.583025	1.41786	0.524765	0.672857	0.173152	0.180348	0.422323	0.462681	0.529064	1.64187	0.185232	0.910007	0.205963	0.705589	0.450692	0.621043	0.477234	1.20803
b0627	tatE TatABCE protein export complex	0.607894	0.789797	0.742208	0.788729	2.47991	1.15438	0.635949	LQ	0.713055	0.811074	0.963585	LQ	0.708854	1.24305	1.11996	1.0434	0.495454	0.900839	0.883015	0.652235	0.535243	0.740128	0.881171	0.491441	0.435444	0.740725	1.37509	0.679132	1.08631	1.45454	1.3016	0.571275	0.902893	1.58515	0.357955	0.51171	0.677859	0.601228	0.445049	1.31352	0.721509	1.15477	0.512901	1.65287	0.533896	1.25338	0.915196	0.552907
b0628	lipA lipoate synthase monomer	0.287876	0.273535	0.189655	0.212072	0.19179	0.178901	2.70409	2.90615	0.342175	0.689417	19.4701	2.98645	0.636241	1.03135	0.409619	0.304265	0.289093	0.325369	0.408372	0.208451	0.302705	0.417426	0.229749	0.108247	0.156737	0.228436	0.387082	0.256942	0.261038	0.24493	0.369141	0.31988	0.296845	0.522798	0.110258	0.16835	0.228051	0.3769	0.1454	0.252401	0.16252	0.38016	0.232711	0.238646	0.139489	0.209429	0.229911	0.212735
b0629	ybeF predicted DNA-binding transcriptional regulator, LYSR-type	2.83317	3.2531	5.22983	3.58635	7.25689	3.53199	2.77199	9.23138	2.9925	2.74976	1.20793	10.5989	1.98153	3.11114	3.24919	5.66336	1.96633	2.61734	2.57607	1.15049	2.67889	3.02797	2.10295	0.742818	3.90295	4.2636	2.81032	5.70183	3.3206	3.11858	3.87615	3.29525	3.36596	1.17701	7.50713	8.77364	4.87875	3.13423	3.50005	3.9384	4.05225	3.32726	3.39299	3.43229	0.69149	0.690173	8.25283	3.60485
b0630	lipB lipoyl-protein ligase	0.897493	0.732097	0.315143	1.21018	0.360614	0.321795	37.4911	33.6571	5.35359	11.371	116.865	46.35	8.10638	8.35852	0.556955	0.397865	0.908601	0.867413	0.99896	1.08041	1.33692	1.37267	0.420136	0.959606	3.167	1.08227	0.518656	0.878746	0.423443	0.329376	0.489934	0.86522	0.527962	0.376581	0.30063	0.441305	0.294164	0.306723	0.876049	1.35973	0.643307	0.657275	0.288625	0.456421	0.402842	0.369087	0.304079	1.33804
b0631	ybeD conserved protein	0.693339	0.567285	0.519642	0.906371	0.467719	0.484202	0.946653	LQ	0.826277	LQ	2.36221	LQ	1.00661	1.10592	0.431511	0.86302	0.393257	0.557461	0.600571	0.441719	0.482576	0.638723	0.689004	0.503647	0.586269	0.566584	0.702461	0.573449	0.690715	0.443027	0.586744	0.562545	0.832574	0.834175	0.407399	0.532281	0.385335	0.546046	0.345342	0.560612	1.1685	0.954386	0.469199	0.665788	0.48608	0.384329	0.563816	0.52176
b0632	dacA D-alanyl-D-alanine carboxypeptidase, fraction A; penicillin-binding protein 5	0.43619	0.315327	0.680385	0.327414	0.187642	0.212195	0.507405	0.718509	0.299118	0.660341	0.542727	0.673634	0.559263	0.725947	0.217568	0.485977	0.222978	0.402705	0.378572	0.328317	0.281473	0.315498	0.420538	0.201501	0.22191	0.20192	0.65189	0.215803	0.412742	0.386137	0.324562	0.302375	0.450866	0.484849	2.28811	2.81675	0.358331	0.787966	0.142766	0.48974	0.186712	0.520902	0.177726	0.42068	0.261493	0.271575	0.239702	1.66797
b0633	rlpA rare lipoprotein RlpA	0.594689	0.550596	0.717463	0.317342	0.13801	0.31878	0.658994	0.210403	0.397899	0.341636	0.100157	0.321827	0.0770787	0.586713	1.07089	1.48922	0.489907	0.675768	0.591117	0.730612	0.714025	0.731696	0.932065	0.0949892	0.11178	0.160243	0.856327	1.3374	0.738931	0.518449	0.476702	0.386108	0.367292	0.724913	0.199206	0.155954	0.450563	0.270764	0.046213	0.539273	0.100144	0.750039	0.15743	0.333885	0.239932	0.600316	0.626314	0.176477
b0634	mrdB rod shape-determining membrane protein; sensitivity to radiation and drugs	0.259086	0.396457	0.293255	0.399434	0.195115	0.247425	0.140232	0.240108	0.148009	0.295835	0.143702	0.159966	0.119142	0.412445	0.402635	0.56011	0.221586	0.336222	0.360769	0.165748	0.42836	0.364077	0.545916	0.165234	0.13907	0.158439	0.421648	0.280741	0.463409	0.599588	0.300256	0.221714	0.463016	0.537956	0.190393	0.124137	0.192459	0.338923	0.0768898	0.245728	0.156259	0.539823	0.170483	0.432946	0.185711	0.14188	0.352352	0.451368
b0635	mrdA cell shape; peptidoglycan synthetase; penicillin-binding protein 2	0.0906887	0.172897	0.126059	0.129664	0.0663018	0.10822	0.141896	0.165194	0.106403	0.195789	0.227057	0.298967	0.108483	0.24861	0.257702	0.208296	0.215554	0.338778	0.303677	0.157973	0.495783	0.500582	0.282829	0.0728723	0.112474	0.0842647	0.204514	0.0806386	0.226857	0.154233	0.125871	0.194202	0.180404	0.21983	0.122634	0.0826464	0.159447	0.119054	0.134057	0.0896781	0.0629555	0.218963	0.111891	0.205988	0.073352	0.161623	LQ	0.28732
b0636	ybeA conserved protein	0.241617	0.28413	0.216674	0.303068	0.248693	0.243096	0.216126	0.237858	0.173444	0.246827	0.191008	0.195969	0.388088	0.320021	0.281418	0.347503	0.2906	0.33718	0.312485	0.205188	0.248258	0.25099	0.375011	0.202608	0.22636	0.264315	0.267869	0.213177	0.425024	0.301416	0.352446	0.155203	0.367308	0.4449	0.191829	0.211526	0.168518	0.282408	0.28	0.254952	0.193494	0.507471	0.216289	0.330415	0.232409	0.176383	0.383707	0.219714
b0637	ybeB predicted protein	0.594494	0.718795	0.497046	0.685195	0.545583	0.558668	0.544893	LQ	LQ	LQ	0.598652	LQ	LQ	0.800996	0.604221	0.979653	0.54238	0.678071	0.818209	0.648358	0.489172	0.659745	0.96979	0.481649	0.531087	0.594715	0.71615	0.551527	0.80806	0.645994	0.761208	0.618949	0.980668	1.08324	0.404775	0.568827	LQ	0.62213	LQ	0.68849	0.495994	1.05044	0.501006	0.887521	0.512869	0.55276	0.870389	0.586509
b0638	cobC predicted alpha;-ribazole-5'-P phosphatase	0.568656	0.863791	0.523233	1.27352	0.815855	0.992228	0.807696	0.687508	1.02925	0.581578	0.130054	0.243246	0.511018	0.325048	1.25458	4.39385	0.693006	0.840422	0.719157	1.13881	0.134643	0.147491	1.81759	0.366711	2.38941	1.99909	0.94277	0.675157	1.22307	1.46285	1.22881	0.934386	1.46412	0.929978	0.0791653	0.103524	1.43615	2.10505	1.05529	0.530033	0.163534	1.03165	1.03843	1.59954	0.393131	0.203681	1.38256	0.373627
b0639	nadD nicotinate-mononucleotide adenylyltransferase	0.367934	0.373077	0.26806	0.376008	0.307297	0.327666	0.279241	0.370167	0.309787	0.537085	0.30216	0.311499	0.322933	0.689722	0.529411	0.562216	0.333634	0.432923	2.86913	0.54342	0.239763	0.306941	0.474607	0.255929	0.275221	0.322291	0.359338	0.336869	0.439459	0.251914	0.395554	0.361537	0.402296	0.531871	0.163958	0.24516	0.21378	0.337161	0.168582	0.380937	0.441638	0.578771	0.437929	0.640808	0.782887	0.352262	0.445985	0.283883
b0640	holA DNA polymerase III, delta; subunit	0.3698	0.283771	0.336015	0.225466	0.135445	0.15318	0.113441	0.169759	0.225478	0.444213	0.180137	0.177489	0.183805	0.433495	0.453848	0.289928	0.399289	0.218837	0.232158	0.280022	0.300557	0.294338	1.19939	0.128723	0.155101	0.211623	0.406994	0.212938	0.261758	0.223486	0.202823	0.413252	0.281571	0.296273	0.124999	0.102837	0.103778	0.19623	0.098036	0.323206	0.117223	0.349983	0.384337	0.30341	0.154503	1.09452	0.493004	0.139598
b0641	rlpB rare lipoprotein RlpB	0.150324	0.183194	0.214085	0.226147	0.118495	0.154079	0.155174	0.216023	0.284192	0.250219	0.264709	0.224197	0.244127	0.282516	0.295519	0.3723	0.22004	0.290003	0.233443	0.243502	0.209895	0.171974	0.294847	0.159144	0.180469	0.183395	0.343767	0.145774	0.333766	0.192447	0.17587	0.206497	0.306447	0.369635	0.149238	0.127172	0.206059	0.195662	0.149295	0.159373	0.161788	0.405134	0.154037	0.319348	0.187638	0.194969	0.237082	0.346517
b0643	ybeL putative alpha-helical protein	1.0528	1.78501	0.756092	1.14622	2.11396	1.51453	0.643446	0.886206	0.984077	LQ	0.517037	0.734439	0.417944	0.534344	1.44106	0.825392	1.65873	0.953924	1.05024	1.87808	0.54607	LQ	0.723888	1.27235	0.709606	0.670618	1.6818	0.787879	1.44036	0.548458	0.689652	0.911501	1.09544	0.706662	0.610638	LQ	2.4437	1.60228	1.74767	1.47649	0.355854	1.17506	1.10311	1.26349	0.611096	0.699367	0.493077	0.642843
b0644	ybeQ conserved protein	1.10533	1.11427	1.18583	1.32408	1.06636	1.05428	2.40877	1.33392	3.14671	1.02201	3.27151	LQ	0.991225	1.33991	3.83103	2.2337	3.41584	1.15504	1.4132	3.04049	1.17691	1.17159	1.5471	1.07552	3.83993	1.15925	1.46063	1.14386	1.73111	1.17431	0.925458	3.8821	1.96178	1.72208	1.26002	1.55132	5.20782	1.18352	3.86316	1.02947	0.939687	2.02127	0.991236	1.55882	1.26626	1.58686	1.07179	3.13551
b0645	ybeR predicted protein	4.24155	5.55178	4.01447	7.56743	7.13426	4.13338	3.29361	3.76698	3.01283	2.86364	1.94205	3.16831	0.865574	LQ	4.77094	2.07748	4.63881	2.66784	2.67749	3.29454	9.97222	7.493	2.44006	3.90262	2.95566	4.41282	4.27748	6.2132	4.13983	4.68262	4.35039	2.71225	3.12519	5.92724	3.46	3.53971	4.20835	5.47229	6.32728	5.00277	3.26803	4.38239	3.31413	4.4895	0.844555	4.81154	4.20836	7.81571
b0646	djlB predicted chaperone	5.54631	6.22742	5.05423	6.58206	11.3558	6.93275	9.05606	5.20403	5.25842	3.62201	3.65362	4.84346	1.93648	0.910764	7.2904	7.91278	6.26124	5.63973	6.00622	6.27041	5.31345	6.48831	6.80047	8.07862	14.5826	5.98705	4.96462	6.87316	7.58255	6.49895	8.88096	10.567	7.01562	8.17477	5.69211	8.55045	9.50887	5.8501	8.39928	5.80391	9.50454	4.27773	7.98918	7.50679	20.6133	8.95557	6.84514	11.1789
b0649	djlC Hsc56, co-chaperone of Hsc62	1.97868	1.79875	2.08701	1.69087	2.06447	3.36029	1.73313	0.971993	0.847128	1.75507	1.57352	0.694101	1.01084	0.867345	1.49104	2.08244	1.10834	1.68021	1.4615	2.08233	1.52355	1.25286	0.758789	1.54576	1.14631	4.10543	2.36327	2.28282	2.2981	2.10467	2.10656	1.54944	1.48752	2.54108	1.32136	1.74744	1.3742	2.56502	1.60535	1.41099	1.06925	1.59359	2.76697	1.53355	4.10217	2.69313	1.55932	3.81002
b0650	hscC Hsc62, Hsp70 family chaperone, binds to RpoD and inhibits transcription	1.755	1.42286	1.55995	1.81805	0.678472	0.942864	1.618	0.75116	1.11244	1.25857	1.91715	1.01446	0.859338	0.843028	1.89446	1.95515	1.70377	2.10367	2.08387	2.35585	1.11818	1.11376	1.01875	1.30044	2.98886	1.4446	1.67602	0.867198	1.33953	1.23484	1.33827	1.90143	1.95278	1.68441	2.62108	3.43035	2.03259	2.87336	1.97204	1.96202	2.17681	1.84023	2.1064	1.7864	0.458606	1.76449	0.3524	0.68278
b0651	rihA ribonucleoside hydrolase 1 (pyrimidine-specific)	1.43273	1.84616	0.946016	2.14744	1.60248	1.37185	1.45007	0.965831	1.03613	1.54818	2.16197	1.21734	0.60609	1.07752	1.64484	1.25661	1.75118	1.86067	1.82899	2.13829	1.29807	1.42784	1.44079	1.73228	1.75209	0.892182	1.94317	1.708	1.37977	1.3594	1.47337	2.29795	0.801509	1.94864	6.5413	8.71714	0.740731	1.13653	1.66395	1.9396	1.57797	1.29791	0.841608	1.40428	0.860726	1.72968	1.00922	1.79704
b0653	gltK GltIJKL glutamate ABC transporter	2.06095	1.23664	0.551181	0.719052	3.46485	0.27603	1.53545	0.235873	0.659656	0.991832	0.742291	0.487163	0.646002	0.652317	0.945659	0.912066	0.926689	1.4029	1.48644	0.714181	0.265034	0.245376	2.0607	1.9667	0.525283	0.390929	0.818078	0.23349	0.679812	0.994884	0.888296	0.790614	0.902151	0.810604	0.209452	0.173919	0.914146	1.23058	0.921335	0.531612	3.39562	1.0253	1.21222	0.945906	0.134261	0.570221	0.760452	0.683771
b0654	gltJ GltIJKL glutamate ABC transporter	0.716593	0.688331	0.96296	0.575019	1.1098	0.549967	0.643154	0.225965	0.528495	0.554389	0.796914	0.400889	0.241206	1.27636	1.02189	0.83668	0.532952	0.970887	1.01009	0.945843	0.196609	0.280423	1.64999	3.00456	0.28313	0.312557	0.714845	0.15387	1.05576	0.648268	0.572376	0.697406	1.36419	1.27299	0.22714	0.228225	0.781455	1.03387	0.795968	0.651173	0.136495	0.847798	0.297589	0.660464	0.137209	0.430204	0.607158	0.98903
b0655	gltI GltIJKL glutamate ABC transporter	0.485101	0.744367	1.1258	0.486328	1.20055	0.806845	0.83383	0.604871	0.627726	0.954977	0.385284	1.11224	1.36404	0.628713	0.496279	0.734669	0.617816	0.863784	0.820228	0.585688	1.4212	1.21428	0.775755	6.5017	0.342126	0.646025	0.899496	0.682299	0.471203	0.858217	0.763985	0.653626	0.597461	0.563959	0.503811	0.447398	0.412944	0.317119	0.770455	0.388427	0.210562	1.1664	1.0523	0.514271	0.511665	0.872188	1.2105	0.999342
b0656	insH-3 IS5 transposase and trans-activator	1.7675	1.67445	1.80015	1.54246	1.04034	1.23333	1.33831	1.0638	0.94451	1.0771	1.65128	0.881851	0.590513	0.626327	1.00583	1.45049	1.11879	2.53085	2.09416	1.48272	2.62504	2.235	1.83355	1.46115	2.26398	1.32591	1.73754	1.56238	1.40708	1.79486	1.82063	1.06607	2.039	1.43829	1.47945	1.29272	1.05283	1.24423	1.08521	1.31706	1.44716	1.36333	1.81538	1.28819	1.68111	1.41656	1.35349	1.99858
b0657	lnt apolipoprotein N-acyltransferase	0.208061	0.218065	0.175346	0.384081	0.116774	0.202376	0.175063	0.239159	0.218343	0.367453	0.223164	0.297842	0.163525	0.258053	0.189931	0.275351	0.162425	0.289009	0.305033	0.181308	0.548426	0.553568	0.223967	0.112023	0.104329	0.319092	0.419832	0.351058	0.397996	0.203948	0.200037	0.17144	0.234632	0.265665	0.148526	0.130066	0.117068	0.32882	0.134441	0.198503	0.116517	0.277744	0.297512	0.374104	0.11729	0.413491	0.196934	0.1596
b0658	ybeX predicted ion transport protein	0.574221	0.811783	1.07419	0.753964	1.05705	0.51637	0.570924	1.24563	0.745626	1.31712	0.469396	0.250573	0.493348	1.41314	1.47811	0.393196	0.955641	0.84302	0.743807	0.636545	0.385216	0.350698	2.39956	0.223515	0.102336	0.470013	1.0481	1.50453	0.836699	0.913891	0.908477	0.26453	0.334935	0.913398	0.185066	LQ	0.768189	1.43994	0.174065	0.905975	0.954861	0.768746	0.553443	0.882355	0.0888084	1.13489	0.295343	0.12569
b0659	ybeY conserved protein	0.394451	0.610524	0.430245	1.21094	0.834169	1.2543	1.00862	1.60783	0.79112	0.565124	0.395065	0.432583	0.407649	0.999915	0.840708	0.445087	0.292217	0.44353	0.545906	0.350602	0.26048	0.395664	1.00592	3.60039	0.207	0.347048	0.962817	0.750093	0.731467	0.682245	0.793215	0.479087	0.455324	0.493519	0.254648	0.263527	0.742791	0.980699	0.363083	0.382907	0.309634	0.583406	0.300801	0.604241	0.267856	0.274769	0.334433	0.409653
b0660	ybeZ predicted protein with nucleoside triphosphate hydrolase domain	0.236806	0.697962	0.523424	0.412272	0.138347	0.257957	2.80662	3.19131	0.618022	0.727681	1.01573	0.531984	0.308886	1.44185	0.290401	0.283846	0.464405	0.891292	0.844874	0.564658	0.271037	0.251436	0.506801	2.2214	0.227747	0.565055	0.951416	0.85736	0.925027	0.865595	0.890779	0.438093	0.375992	0.354852	0.166681	0.147807	0.400948	0.668735	0.180433	0.982353	0.429342	0.777266	0.951222	0.341556	0.116731	0.433327	0.229881	0.489032
b0661	miaB isopentenyl-adenosine A37 tRNA methylthiolase MiaB	0.875837	1.03273	1.08722	0.959712	0.623166	0.614537	1.09017	LQ	0.822319	LQ	1.14145	1.43521	0.68598	1.39365	0.913574	1.14237	1.19357	1.07181	0.858321	0.649757	0.927467	1.05968	1.13401	0.763525	0.615571	0.731781	1.34187	LQ	1.25369	0.886132	0.820787	0.622888	1.56418	1.08819	0.379124	0.389331	0.846986	0.744344	0.671932	0.896626	0.403478	1.32989	0.815014	1.35199	LQ	1.17555	0.829214	0.811225
b0662	ubiF 2-octaprenyl-3-methyl-6-methoxy-1,4-benzoquinone hydroxylase	0.45906	0.632356	0.59464	0.661799	0.492649	0.453215	5.67678	8.91297	3.61118	2.45258	11.0912	14.6304	2.5274	4.85242	0.568414	0.715297	0.563133	0.540798	0.592168	0.538152	0.528311	0.657087	0.862145	0.385889	0.410479	0.694237	0.83067	0.602529	0.720786	0.529844	0.577982	0.411186	0.767752	0.863435	0.343439	0.377976	0.405309	0.522038	0.467833	0.631279	0.358461	0.858067	0.439234	0.756195	0.397519	0.513605	0.517451	0.563789
b0667	b0667	0.859662	0.94295	0.932959	1.00485	0.734516	0.71282	0.775517	0.90461	0.879892	0.814997	0.887174	LQ	1.04651	1.24214	0.812089	1.47201	0.805224	0.744065	0.989743	0.784175	1.34745	1.25214	1.19019	0.738735	0.930054	0.807394	1.10318	0.834731	1.19048	0.800576	0.90659	0.75783	1.43786	1.42062	0.60564	LQ	0.688181	0.869583	0.619021	0.821807	0.841443	1.70324	LQ	1.22259	0.710253	0.740222	0.82823	0.779783
b0669	b0669	0.864936	0.919079	0.893138	1.00704	0.741707	0.768169	0.801462	LQ	0.881815	LQ	0.842847	LQ	1.1656	LQ	0.848049	1.51486	0.85319	0.931486	0.967139	0.783279	1.55159	1.20143	1.22246	0.778852	0.870014	LQ	1.1488	LQ	1.23081	0.849979	LQ	0.802498	1.47364	1.41898	0.675875	LQ	0.760483	0.869282	0.678651	LQ	LQ	1.74674	LQ	1.22145	0.703287	0.799596	LQ	0.811184
b0671	b0671	1.16906	0.768147	0.755254	0.808958	0.643895	0.651637	0.592501	0.950052	0.702385	0.907703	0.768527	0.862091	0.882234	1.11123	0.584524	1.18978	0.574833	0.73371	0.891389	0.578317	0.752203	0.887248	0.980977	1.40231	0.636587	0.758415	0.977093	0.723753	0.927792	0.622566	0.847967	0.596426	1.11908	1.10242	0.503004	LQ	0.551514	0.736456	0.468711	0.900194	0.672996	1.3401	0.527325	1.05821	0.613082	0.534615	0.769982	0.694537
b0674	asnB asparagine synthetase B	1.22169	1.52531	1.0333	1.19205	0.72273	0.607619	1.30979	0.79265	1.66386	1.54083	0.694867	1.63801	1.32819	1.11578	1.18038	0.788276	1.31946	0.990999	0.837342	0.991509	0.570889	0.540794	0.864159	0.472854	0.506595	1.00892	1.69887	0.946166	0.855093	1.23829	1.24155	1.44187	0.807383	2.0038	0.207957	0.1824	1.05764	0.824629	0.407347	0.991722	2.49522	1.48666	0.692036	1.05435	0.337799	1.2838	0.994041	0.889635
b0675	nagD ribonucleotide monophosphatase	0.674123	0.891562	1.35742	1.19938	0.230764	1.76745	1.35789	0.549953	0.72251	1.21748	0.18089	0.602119	0.828034	0.557372	0.844312	0.47072	0.681567	0.497366	0.487346	0.925951	0.980542	1.121	0.748613	2.27614	3.06632	0.285629	0.937477	0.775569	0.467069	0.722827	0.78969	0.612481	1.61457	1.15619	0.225489	0.216387	1.19243	0.677625	0.207155	1.14751	1.3689	0.76091	0.943001	1.10248	0.155286	0.93033	0.317794	1.49161
b0676	nagC NagC transcriptional dual regulator	0.514544	0.455037	0.622921	1.59958	0.885507	0.166104	0.267784	0.191185	0.562095	0.349031	0.174987	0.317939	0.605955	0.146961	1.41491	0.908049	0.84747	0.402981	0.435206	1.89846	1.06225	1.3242	0.969667	1.43013	0.541433	0.870546	0.910704	0.794403	0.769063	1.09352	1.14252	1.00235	0.779963	0.638533	0.0536553	0.0410846	0.413304	1.02021	1.25443	0.904196	0.242981	0.781155	0.679649	0.884469	0.0745716	0.600783	0.604071	5.03535
b0677	nagA N-acetylglucosamine-6-phosphate deacetylase	0.722002	0.813265	1.00034	0.930048	0.361749	0.420486	0.184492	0.366306	0.412958	0.683728	0.155188	0.462658	0.475808	0.864947	1.33493	1.41375	0.745825	0.933888	0.887465	1.38601	1.05048	1.12975	1.18586	2.17642	2.8596	0.792642	1.07903	1.08622	1.28318	0.810986	0.899869	0.893483	1.08658	0.895823	0.21937	0.212136	0.612238	1.21153	0.387687	0.990508	0.252335	1.19093	0.733643	1.17691	0.21947	0.780456	1.09495	5.17501
b0678	nagB glucosamine-6-phosphate deaminase	1.81779	1.0414	1.61833	0.759359	1.25602	1.86637	1.2344	0.463139	0.831102	1.60487	0.143792	1.09087	0.965111	0.614149	0.814246	1.04424	2.10745	0.866382	0.851097	1.18721	2.69229	3.66433	1.26305	0.727765	4.98676	1.79935	1.39287	1.48323	1.23391	1.10613	1.07398	2.36272	1.99966	1.05356	0.245042	0.251777	1.82936	0.796896	2.72284	2.66881	0.370926	1.08101	1.24045	1.09327	0.259802	1.56891	1.99274	2.79335
b0679	nagE N-acetylglucosamine PTS permease	0.948471	1.15876	0.848138	0.969176	0.194909	0.537379	1.28852	1.37195	0.729346	1.13776	0.904528	0.511526	0.529439	0.645952	0.801485	1.35446	0.891037	0.798731	0.828577	0.646458	0.253154	0.289758	0.65877	0.0918064	0.118953	0.47782	1.19301	0.445899	0.730101	0.676429	0.620586	0.639116	2.07891	0.487796	1.5021	1.71609	0.331854	1.01899	0.256879	0.791897	0.184694	0.781786	1.55954	0.866691	0.0906772	0.690269	0.843297	0.159259
b0680	glnS glutaminyl-tRNA synthetase	0.31576	0.375668	0.38118	0.526374	0.236875	0.250305	0.220671	0.358405	0.36119	0.500254	0.308152	0.409224	0.27095	0.717367	0.3167	0.418345	0.412542	0.306233	0.353256	0.202196	0.308606	0.317002	0.346574	0.232672	0.206006	0.508463	0.444885	0.639866	0.372765	0.346783	0.347256	0.344549	0.411153	0.397176	0.206032	0.251362	0.265458	0.368502	0.182866	0.461129	0.233726	0.502123	0.213197	0.347586	0.230267	0.220183	0.260823	0.197936
b0681	ybfM predicted outer membrane porin	1.62456	0.88462	1.69675	0.598248	1.4455	1.45129	0.942224	1.01088	0.875483	1.22481	0.399205	0.812521	0.998834	0.56573	1.11393	0.479984	1.35244	0.771121	0.785719	1.18192	2.67591	2.34643	1.08698	1.3497	1.02581	0.89564	1.08335	0.50464	0.702925	0.85922	0.802236	1.0489	1.13907	1.34578	1.72043	1.85626	0.816494	0.501568	0.852252	1.93964	1.0011	1.05624	0.402998	1.25831	0.220838	0.736804	0.731822	1.57989
b0682	ybfN predicted lipoprotein	0.890059	0.958481	1.02981	1.17407	1.29576	1.28598	0.690909	LQ	1.04401	LQ	0.704972	LQ	1.41708	1.16698	1.26073	1.79921	1.1833	1.08161	1.04584	0.764733	0.80282	0.976773	1.37182	1.11128	1.55865	0.853514	1.22331	LQ	1.21951	0.781183	0.92762	0.862064	1.52092	1.44447	1.08443	LQ	0.879777	0.950778	0.671925	0.867315	0.645552	1.67004	0.692693	1.49212	0.663687	0.715241	1.02406	0.889863
b0683	fur Fur-Fe+2 transcriptional dual regulator	0.394465	0.822541	1.02172	1.03886	0.360363	1.22436	0.859299	LQ	1.80229	LQ	1.04541	LQ	2.20915	1.88616	1.09684	0.935805	2.50189	1.23061	1.08279	0.692448	0.476664	0.558946	0.739249	0.398534	0.603977	0.333487	0.744582	0.423522	0.57402	0.46155	0.575973	2.10935	0.92972	3.00465	0.395366	LQ	1.03251	0.590053	0.481797	0.814666	0.241728	0.966093	LQ	0.758789	2.1427	1.00215	1.34243	1.09986
b0684	fldA oxidized flavodoxin 1	0.225116	0.633256	0.598331	0.678812	0.656868	0.457854	0.398143	0.444914	0.716555	0.657111	0.487804	0.839018	1.28919	1.20519	0.74535	0.628875	0.9287	0.689564	0.749484	0.487045	0.278709	0.341837	0.784875	0.252949	1.26506	0.270419	0.483437	0.304973	0.381139	0.591044	0.581368	0.62295	0.573042	0.506624	0.32954	LQ	0.519371	0.287567	0.988642	0.415934	0.456248	0.505841	0.235566	0.490922	0.361415	0.39045	0.294233	0.48597
b0685	ybfE LexA-regulated protein	0.496578	0.910898	0.515091	0.642606	0.437055	0.541724	0.743058	0.505908	0.732908	0.918898	0.463489	0.624117	0.502746	0.655427	1.95453	0.767852	1.45985	1.21748	1.34591	0.50664	1.70049	1.53952	1.63821	0.357248	0.764728	0.384095	0.990422	1.28794	0.621492	0.373397	0.508131	0.522068	0.696331	0.709059	1.62282	1.70886	0.449096	0.452976	0.212209	0.954518	0.347427	0.752835	0.76292	1.60731	0.368599	0.470356	0.444026	1.17861
b0686	ybfF esterase	0.662827	0.841873	0.936126	0.970266	0.416193	0.611297	0.846423	0.66058	0.639666	1.31979	0.524362	LQ	0.605038	0.4565	0.957513	1.33352	0.68399	0.884325	0.967539	0.427046	0.2811	0.45096	0.893842	0.660681	0.226634	0.335496	0.987816	0.849128	0.876893	0.613093	0.640293	0.674656	0.516099	0.827772	0.259136	0.391254	0.491259	0.49986	0.194291	0.504544	0.374396	1.20076	0.910698	1.36638	0.317691	1.01207	0.459916	0.375644
b0687	seqA SeqA, negative modulator of initiation of replication	0.504468	0.425535	0.257163	1.07117	0.239851	0.295528	0.342171	0.524322	0.378888	0.58057	0.291706	0.51999	0.425127	0.460498	0.485414	0.425607	0.759261	0.821011	0.792993	0.480386	0.293532	0.372078	0.406486	0.199213	LQ	0.189918	0.50161	0.300753	0.352905	0.183499	0.271171	0.272837	0.391116	0.39396	0.138183	0.195254	0.279195	0.29922	0.144936	0.404274	0.201359	0.628554	0.230122	0.446353	0.188482	0.554226	1.74899	0.30053
b0688	pgm phosphoglucomutase	1.12828	0.509336	0.582529	0.570341	0.304994	0.17111	0.53385	0.269737	0.363979	0.506818	0.260352	LQ	0.34264	0.552452	0.930348	0.788435	1.64883	1.66468	1.51592	0.295396	0.302909	0.312191	0.41014	0.129103	0.17306	0.124564	0.746092	0.680287	0.210733	0.250085	0.369755	0.7193	0.229651	0.344015	0.143242	0.183316	0.319698	0.154481	0.177334	0.272602	0.223854	0.282937	0.427316	0.239273	0.521825	0.989881	0.532904	0.361694
b0690	ybfG	3.39957	3.44338	2.20598	3.05667	4.29878	4.23765	6.00601	LQ	1.79161	2.13106	1.56004	LQ	1.87818	2.42356	4.19309	2.64693	5.05022	3.35168	2.6714	4.63251	3.47881	2.41139	5.36252	2.29219	2.42058	2.86563	3.01176	3.07106	2.98891	2.6633	2.67229	2.04063	3.53022	3.69681	2.57498	2.98097	1.99684	2.50479	1.47199	3.268	2.38769	3.5478	LQ	2.44379	LQ	5.48904	3.24667	4.30917
b0691	ybfH	3.52999	3.7434	3.37185	4.44105	5.25452	4.8608	3.99656	LQ	2.44578	2.7154	1.62951	LQ	2.47586	2.06516	7.11335	1.6587	6.53586	4.09357	3.6483	5.38018	2.26367	2.07469	5.10664	5.33614	6.7299	2.94132	4.39118	3.68361	3.58677	3.86483	4.72787	7.54342	3.1226	5.30797	2.86451	LQ	4.3004	3.32175	1.56931	4.61135	3.85384	5.8176	5.29464	3.04377	10.7682	10.5849	3.8197	10.1082
b0692	potE putrescine/proton symporter: putrescine/ornithine antiporter	1.46465	2.13127	1.54374	2.16943	1.40016	2.19022	2.73445	1.67831	0.835381	2.52554	2.63847	1.92578	0.93037	1.34357	2.48613	1.63024	2.3106	1.802	2.39837	2.23115	0.892139	0.942627	2.16786	4.86818	1.46016	0.738692	2.48861	3.19241	1.42759	1.47395	1.64448	1.79281	1.24366	1.76709	0.664736	0.619822	1.16751	1.37628	1.55239	1.91403	1.49677	2.60443	0.779582	2.03143	0.525802	3.58504	0.966705	1.74641
b0693	speF ornithine decarboxylase, degradative	0.849458	1.10067	0.93249	1.56419	1.23216	1.2382	1.62638	1.06708	1.11517	1.29301	0.59673	1.44209	0.68019	0.324997	1.38196	0.756957	1.60463	1.73134	1.59041	1.57671	1.4148	1.30843	0.973145	2.64573	1.2841	1.09564	1.42007	1.27487	1.24573	1.78452	1.90742	1.17309	1.49073	1.17115	1.35532	1.84365	1.51475	1.39009	2.09769	1.0832	0.785828	0.753449	1.58799	0.765133	1.22347	2.08086	2.04203	1.08408
b0694	kdpE KdpE-Phosphorylated transcriptional activator	0.717572	1.14682	1.33072	1.63751	0.675279	0.866562	1.12314	0.828684	0.479082	1.18149	0.474072	0.946709	0.287948	0.573464	1.41886	0.847082	1.44607	1.09191	1.22188	0.949356	0.68621	0.834969	1.12918	0.4758	3.36414	0.563479	1.12243	0.663339	1.07749	0.874948	1.06492	1.48437	1.33929	1.30687	1.34972	1.72097	0.580986	0.557196	0.550221	0.717283	0.995379	1.16555	0.617737	0.650882	3.77951	0.792146	1.24084	2.01761
b0695	kdpD KdpD-P his	0.479557	0.816817	0.600093	0.752884	0.359609	0.434678	0.523841	LQ	0.488669	LQ	0.30954	LQ	0.141636	0.639273	0.579618	0.845595	0.711108	0.630639	LQ	0.505585	0.357112	LQ	0.740753	0.510887	0.749776	0.621933	0.896693	0.961119	0.96206	0.655851	0.698849	0.825864	1.47574	0.985197	0.42469	0.641229	0.399489	0.772945	0.984334	0.528658	0.741124	0.826453	0.24499	0.661631	2.44611	0.490574	0.346346	1.18811
b0696	kdpC potassium ion P-type ATPase transporter	0.660171	1.19417	0.775295	0.580261	0.189451	0.390128	1.04253	0.548119	0.876146	0.875786	0.225711	0.25122	0.746469	0.945245	0.745853	2.03754	1.33417	0.907995	0.867069	0.936688	0.333759	0.330968	0.408783	0.151905	0.212433	1.00717	1.71504	0.877424	0.819681	1.02761	1.17168	0.323669	0.663463	1.16044	0.435719	0.390205	0.369391	2.35028	0.174767	0.628622	0.877721	1.15534	0.237884	1.03382	0.582838	1.29485	0.245875	0.645662
b0697	kdpB potassium ion P-type ATPase transporter	0.553375	1.03728	0.686161	0.768862	0.416943	0.487374	1.28388	0.497032	0.630391	0.923942	1.23601	0.253584	0.404691	0.649155	0.838628	1.42418	1.28734	1.02724	1.01977	0.450822	0.737164	0.62374	0.84337	0.359153	1.18052	0.643379	1.02988	0.704085	0.682549	0.803654	0.763844	0.465168	0.425844	1.30917	1.39555	1.60242	0.479728	0.853249	0.13757	0.531824	0.509365	1.04106	1.33939	0.686672	0.10459	1.26135	0.153443	0.391407
b0698	kdpA potassium ion P-type ATPase transporter	1.85025	1.52241	1.18837	1.91749	0.657855	0.992765	1.07405	0.879672	0.728877	0.807059	0.586706	0.687336	0.156658	1.37396	1.04943	1.63948	0.957289	0.523014	0.506622	1.37841	0.704238	0.593084	0.648206	0.809724	2.07425	0.293717	1.05617	1.15519	1.66375	0.763951	0.741664	0.914487	1.8252	0.734436	1.01452	0.90497	2.13049	1.25672	1.1844	0.961617	0.681756	1.10995	0.738243	0.912896	0.075898	0.565035	0.338165	0.209091
b0699	ybfA predicted protein	0.835687	0.976774	0.865461	0.849744	0.760406	0.608886	0.59592	LQ	0.537158	1.05139	0.599266	LQ	1.04918	1.29398	1.5269	1.47644	0.996147	0.890014	LQ	0.795394	0.595671	0.628114	0.918842	0.565417	0.592449	0.613226	0.912154	1.49002	0.977082	0.848042	0.981355	0.812118	1.26049	1.41751	0.531845	0.676378	0.758556	0.75804	0.471234	0.859962	0.556933	1.49544	0.613303	0.854746	0.511271	1.04045	0.675538	0.781763
b0701	rhsC_2 RhsC element protein	2.368	1.90087	1.82718	2.3291	4.27658	2.60382	1.13477	1.68809	1.96746	2.30457	1.00479	2.71068	2.27045	0.910499	2.9262	1.13718	3.63563	2.42044	2.23641	1.75275	3.59634	3.58867	2.58463	1.03661	2.61608	2.72647	2.76015	2.64787	2.10824	2.63072	2.27251	4.7175	2.19703	2.32647	5.89567	5.51296	2.44813	1.6691	3.22632	3.25896	2.63352	1.82004	2.60445	2.87849	0.733546	2.56702	2.63531	3.51563
b0703	ybfO putative rhs protein	2.88887	2.54041	3.65395	1.99797	2.03211	2.97784	2.34192	1.65558	1.37609	2.14779	2.91478	2.44423	0.894203	1.94149	2.17541	0.997042	2.49784	3.05677	2.81108	2.94439	1.72235	2.1873	4.09045	4.91876	2.95878	2.46231	3.3596	2.90823	2.97356	2.52574	3.7515	2.61814	2.77662	3.02008	2.81881	3.81518	1.5957	1.90592	1.67538	3.28383	3.58982	4.14304	3.51121	2.2571	2.5127	3.72063	2.81009	3.37068
b0704	ybfC predicted protein	2.90664	2.27291	1.93571	2.23617	4.7667	8.00052	0.472832	LQ	1.628	0.910991	0.63959	2.57549	0.768598	0.716331	1.23903	0.872951	1.15366	1.98383	1.95226	1.21332	1.50308	1.43053	0.829378	6.76089	1.17136	5.71966	0.764784	3.53674	0.857861	2.89725	3.15905	2.5549	1.13455	0.881779	6.58858	6.43309	5.26278	4.03319	3.48253	1.94101	3.31743	1.1255	4.89817	0.849397	2.46961	0.541356	8.02969	0.609442
b0705	ybfL predicted transposase; receptor protein	4.46092	3.40942	3.83255	3.92379	5.13226	6.41075	1.18233	LQ	2.71807	LQ	1.67464	LQ	1.94811	LQ	2.50139	1.35578	4.12445	3.99869	3.19928	2.78052	7.9238	5.55599	1.7926	2.92894	4.24052	6.74093	2.25486	5.5264	1.73042	5.27421	3.18301	12.3025	3.00457	1.5574	15.7994	10.9217	3.96391	4.88553	8.48053	4.94682	LQ	1.77521	4.94922	2.40761	13.8708	1.94138	10.5322	2.2385
b0706	ybfD putative DNA ligase	3.84447	2.91094	2.54395	2.58124	2.68213	5.35717	0.887511	1.22148	2.3143	1.0557	1.51449	1.46888	1.62119	0.851722	2.26	1.46741	2.81113	2.40699	1.71423	2.42197	4.2753	2.86627	1.30142	2.40497	3.40774	2.51924	1.94548	1.64593	1.98893	4.00749	2.12672	6.6759	2.7692	1.15133	6.99674	2.79411	4.3272	3.64557	7.76532	2.04274	2.05857	1.34062	1.95765	2.12611	3.58082	2.07409	7.86635	2.23549
b0707	ybgA conserved protein	1.51031	3.20273	2.28612	4.09975	3.37564	3.04068	0.790704	1.54827	2.40172	0.945355	0.68189	1.06815	0.544626	0.538433	2.04188	1.72189	2.4533	1.90077	1.81313	1.32096	2.64722	2.05073	0.76141	1.36932	1.18166	1.64901	1.52947	2.66553	1.75067	1.5319	1.86643	2.4093	1.80224	4.28562	1.42395	1.77197	2.84479	3.5886	6.28871	2.45446	1.7141	2.29998	5.30981	2.0657	0.839732	0.890438	4.34969	0.944648
b0708	phr deoxyribodipyrimidine photolyase (photoreactivation)	0.535301	0.742737	0.520323	1.36206	0.309719	0.72655	0.893676	0.595847	0.830479	0.527736	0.394056	0.535816	0.622798	0.347128	0.678453	1.28005	0.771035	0.510996	0.583984	0.347393	0.639635	0.82931	0.694876	0.267666	0.761037	0.362576	1.20653	0.365926	0.780862	0.649271	0.715559	0.896255	0.780611	0.460585	0.441784	0.599085	0.599329	0.568045	1.52789	0.457248	0.613238	1.00602	0.20429	0.75509	0.699118	0.510992	1.15789	1.1893
b0709	ybgH YbgH peptide POT Transporter	2.2276	1.81651	1.95921	2.0414	2.23297	1.88487	2.711	2.33403	2.49881	0.756887	0.369716	0.618698	0.218717	0.87893	1.51615	0.280958	1.29399	1.48059	1.79015	0.745189	1.97892	2.93314	2.0193	0.105655	1.97133	3.87149	1.227	2.71777	1.76301	1.41841	2.03326	0.975008	2.86924	1.81303	3.30072	4.45275	3.36555	3.02161	3.21343	2.04057	0.574747	1.71749	2.02232	1.48082	0.245007	0.930431	4.84986	1.43761
b0710	ybgI conserved metal-binding protein	0.365663	0.601538	0.821854	1.43088	1.68786	0.524494	0.615011	0.683359	0.437207	0.942172	0.472335	0.802639	0.973187	0.517537	1.07669	0.759914	0.91841	0.735241	0.901431	0.782592	0.41299	0.624754	0.599877	0.373554	0.329242	0.580898	0.910119	1.13152	0.833283	0.74246	0.988048	0.6769	1.91815	0.556244	0.542499	0.683348	0.694219	0.531458	0.306091	0.51605	1.43307	0.605946	0.35501	0.78326	0.228199	1.16979	0.675042	1.65066
b0711	ybgJ putative carboxylase	0.65462	0.625524	0.247487	0.666586	0.391004	0.206375	0.239394	1.05476	0.33941	0.635026	0.332143	0.404864	0.242126	0.782679	0.767563	0.45682	0.769153	0.526793	0.585672	0.36448	0.710436	0.813622	0.830791	0.0970693	0.412149	0.558219	0.626107	0.762562	0.534255	0.435374	0.48249	0.28009	1.11468	0.828547	1.3379	1.56866	0.222102	0.208547	0.17224	0.337451	0.323446	0.446636	0.61343	0.710125	0.149767	0.580316	0.23705	0.435843
b0712	ybgK putative carboxylase	0.476313	1.04171	0.544798	0.524366	0.288486	0.380652	0.551309	0.320223	0.270627	0.449686	1.1452	0.322547	0.169283	0.679685	0.775919	1.62085	0.468889	0.702035	0.877941	0.58897	0.317825	0.419721	0.907011	0.142037	0.170471	0.32293	1.04853	0.633542	0.752013	0.372996	0.500757	0.578624	0.589855	0.986558	0.200388	0.22876	0.653202	0.252315	0.942298	0.610953	0.609853	0.892473	0.169855	0.772805	0.191762	1.37289	0.31807	1.24725
b0713	ybgL predicted lactam utilization protein	0.442249	0.94218	0.799457	0.976447	0.456685	0.316012	0.818292	0.705179	0.872711	0.601687	0.692162	0.453907	0.473015	0.88015	1.20347	1.59427	0.69839	1.04464	0.985642	0.722809	0.36343	0.439394	0.382992	0.284595	1.00133	0.27878	0.957497	0.789006	1.43277	0.45392	0.510622	1.1314	0.746602	0.919668	0.106247	0.120466	1.03931	0.519843	1.93249	0.817548	0.215581	0.76583	0.94101	1.36387	0.145965	0.533744	1.13653	1.12395
b0714	nei endonuclease VIII	0.579282	0.903485	0.646585	1.4128	0.53438	0.219013	1.38235	0.671843	1.03817	0.617508	1.35001	0.302693	0.770143	0.281805	1.09235	0.371416	0.473178	0.670202	0.6375	0.784547	1.06076	0.965713	0.754513	0.224807	3.99361	1.08734	0.835955	1.1097	0.913081	0.532893	0.512284	0.703062	0.353328	0.300621	0.115915	0.194728	1.48973	1.14559	0.615604	0.450946	1.4488	0.864838	0.457697	1.00009	0.325651	1.27747	0.195191	0.469362
b0715	abrB predicted regulator	0.325557	0.998296	0.349274	0.894518	0.329061	0.254968	0.536288	0.752393	0.697865	0.615924	0.24987	0.61541	0.330358	0.412127	1.0809	0.345917	1.3895	0.608163	0.534316	0.63727	0.688746	0.791585	0.412666	0.321226	0.481264	0.233148	0.837624	0.611295	0.784029	0.603508	0.717262	0.67295	0.273605	0.228719	0.241751	0.37596	0.411976	0.769819	0.203351	0.709402	0.243534	0.966266	0.22721	0.837079	1.50859	0.986233	0.350195	0.215786
b0716	ybgO predicted fimbrial-like adhesin protein	3.14653	3.20343	2.31452	4.33823	3.42539	2.84691	1.61007	2.97838	LQ	2.80305	1.85427	3.88218	LQ	0.813693	2.54186	3.76029	3.64489	2.12874	2.27999	2.79938	3.20114	3.32347	LQ	2.05641	1.33405	2.02504	3.61926	5.49596	3.472	2.3168	2.51553	5.4749	2.87953	1.59908	8.05739	9.61549	2.17826	2.64561	3.98111	5.11053	2.08283	1.95691	3.40066	2.97813	6.65482	2.69554	7.67443	1.87736
b0717	ybgP putative chaperone	1.0519	1.26258	1.09399	0.859678	2.01939	1.05384	0.97903	1.08467	0.914274	1.1145	0.449037	0.915052	0.975666	1.02023	0.779225	1.03105	1.6026	1.64796	1.52955	1.01535	1.21101	1.19039	0.635404	0.469015	1.31125	1.96107	0.984303	1.26997	0.957831	1.24639	1.22407	1.12007	1.34676	1.64807	0.384625	0.461326	0.941641	0.495982	0.827221	1.1389	1.93779	0.957629	1.2802	1.19111	0.393296	1.66035	1.05443	0.800891
b0718	ybgQ predicted outer membrane protein	3.3887	2.08742	3.45157	1.92596	2.65255	2.19445	1.42791	1.30837	1.41985	2.41775	0.292371	1.8687	1.03254	0.832575	1.8995	1.95437	1.80063	2.47126	2.63061	1.87154	2.64749	2.95593	1.60999	2.6179	3.11855	1.56651	2.287	2.30338	2.16453	2.54564	2.79774	1.97895	2.07408	1.61281	1.76869	1.98424	2.08843	1.30708	1.644	2.09422	4.21133	2.09928	2.45569	1.70169	1.34935	2.39311	0.965378	1.68792
b0719	ybgD predicted fimbrial-like adhesin protein	5.19794	3.80966	4.22791	4.45806	5.09131	3.32403	4.82081	3.09811	3.42538	3.18668	8.07025	LQ	1.90957	1.47613	6.50024	5.17306	5.5273	3.67331	2.99618	6.07846	4.5059	4.09333	4.36601	1.98264	4.65682	5.44742	4.31862	4.46952	5.81233	5.58281	5.18899	5.95992	3.83597	4.80176	7.84134	7.33663	6.15168	2.54446	4.85139	4.63575	6.50591	3.32164	2.76403	3.951	4.61557	7.75809	6.19157	7.04293
b0720	gltA citrate synthase monomer	1.66203	1.42589	1.99397	1.18968	1.79367	1.68997	1.70214	2.21019	3.14194	2.58638	2.04756	0.580842	1.39458	0.736112	1.63897	2.06191	1.96476	2.34392	2.26545	2.62561	4.16161	5.17206	1.13728	3.0333	0.400351	1.77079	0.993006	0.937628	1.32807	1.78522	2.25699	2.32631	1.48233	2.81251	2.05367	2.43231	2.02366	1.07422	2.01894	1.54276	1.61128	0.874102	1.34326	0.671798	2.20838	0.759456	3.7321	2.9433
b0721	sdhC succinate dehydrogenase membrane protein	1.85874	0.634584	0.814044	1.20487	0.249587	0.351596	0.462366	2.90071	5.28355	7.12963	0.523927	1.12099	6.5904	LQ	0.924569	2.92736	0.352482	0.482678	0.393802	0.566011	0.532267	0.452445	0.514437	0.377551	0.242322	0.386075	2.30609	1.14895	1.06704	0.465488	0.490109	1.79368	6.51576	3.02172	0.562968	LQ	0.782575	2.09599	0.891093	0.878876	0.617202	1.28097	0.286227	3.92081	0.260074	1.15181	0.296902	0.551859
b0722	sdhD succinate dehydrogenase membrane protein	0.948371	0.67249	2.34514	1.2598	0.421411	0.476086	0.741342	0.988516	3.0058	LQ	0.581998	0.461106	1.10984	LQ	0.760299	1.20969	0.36887	0.44358	0.464052	0.498518	0.55832	0.492517	0.606636	0.288803	0.315157	0.261087	0.87291	1.05874	1.01747	0.488279	0.466841	0.387861	1.06216	0.635736	0.414775	LQ	0.481381	0.99177	0.278777	0.523261	1.1723	2.89187	0.244453	1.77262	0.237122	0.581932	0.266498	0.590918
b0723	sdhA succinate dehydrogenase flavoprotein	0.254918	0.641692	0.439568	0.562731	0.361778	0.476739	1.61329	0.937116	3.16082	3.50651	2.1135	0.377507	1.5419	3.60924	0.428829	0.303378	0.355684	0.246835	0.230492	0.584077	0.310306	0.260211	0.536155	0.0823572	0.109552	0.124982	0.683648	1.163	0.620793	0.18194	0.196345	0.264339	0.316274	0.493045	0.123026	0.122734	0.315212	0.9368	0.104038	0.49887	0.890398	0.512772	0.0755899	0.457443	0.0887508	1.01259	0.22959	0.803192
b0724	sdhB succinate dehydrogenase iron-sulfur protein	0.54576	0.471187	0.368696	0.304167	0.196126	0.186189	1.42736	0.726268	3.32522	3.49827	2.02659	0.605716	4.47337	2.86039	0.33653	0.416701	0.285352	0.312008	0.304561	0.243004	0.447874	0.452336	0.765165	0.171828	0.140972	0.226124	0.77079	0.514953	0.337752	0.381578	0.401746	0.415912	0.37593	2.69613	0.134504	0.136453	0.166879	0.247074	0.184772	0.56725	0.397805	0.978697	0.156294	1.12219	0.24028	0.585867	0.599765	0.198987
b0725	b0725	0.58071	0.598893	0.903872	0.700861	0.49492	0.566934	2.28672	LQ	1.29181	1.24566	0.646819	LQ	3.96243	1.94048	0.585936	1.05429	0.519788	0.564142	0.621607	1.95036	0.658063	0.627628	0.853279	0.477848	0.389459	0.519718	1.06364	0.525862	0.855888	0.653593	0.595878	0.6754	1.00132	1.04772	0.494006	0.44491	0.429737	0.617126	0.453609	0.852866	0.494584	1.1771	0.472162	0.927222	0.516299	0.462874	0.59748	0.577948
b0727	sucB SucB-lipoate	0.155291	0.24059	0.17224	0.158885	0.101635	0.134128	0.305499	0.150262	0.431144	0.466757	0.148736	0.227666	0.413634	0.317732	0.275741	0.27543	0.164529	0.175981	0.139917	0.239659	0.337872	0.36057	0.227149	0.103535	0.0993422	0.118862	0.283575	0.103749	0.235765	0.255976	0.251336	0.222382	0.248331	0.309596	0.182053	0.139853	0.0929036	0.534281	0.168504	0.303196	0.132819	0.379707	0.0904236	0.280834	0.112201	0.214632	0.130888	0.129665
b0728	sucC succinyl-CoA synthetase, beta; subunit	0.251157	0.393533	0.310202	0.583557	0.184295	0.301784	0.27884	0.326332	0.376041	0.647111	0.20797	0.299976	0.226711	0.369584	0.404081	0.320638	0.424434	0.216855	0.234234	0.240976	2.42944	2.38169	0.683062	0.11035	0.165768	0.18872	0.53005	0.229861	0.565105	0.184734	0.224453	0.309266	0.622585	0.787455	0.125891	0.138793	0.330674	0.154417	0.423787	0.57624	0.632771	0.518184	0.123323	0.392014	0.121162	0.873983	0.15918	0.198031
b0729	sucD succinyl-CoA synthetase, alpha; subunit	0.349945	0.420751	0.551121	0.819342	1.17156	0.388975	1.33116	0.512103	0.751744	1.48633	0.184773	1.62873	0.351188	0.969977	0.635759	0.310352	0.949414	0.761131	0.580699	0.961132	0.191735	0.243643	2.62184	0.176834	0.303363	0.229211	1.43622	0.3238	1.13375	0.523491	0.449923	1.11748	0.786272	0.442267	0.788697	1.00189	0.452615	0.148816	0.196152	0.45492	0.129711	1.03755	0.355792	1.46075	0.14134	3.79235	1.05418	0.337306
b0730	mngR MngR-acyl-CoA	0.443342	0.413199	0.379399	0.295668	0.189374	0.26167	0.178797	0.693494	0.910888	0.531263	0.165796	0.576015	0.384439	0.363163	0.426298	0.757387	0.807715	0.643673	0.676783	0.321467	0.310028	0.240284	0.54609	0.541558	0.17404	0.241073	0.427277	0.715892	0.407482	0.518797	0.51276	0.348787	0.579369	0.676561	0.202324	0.287394	0.317332	0.226612	0.389261	0.498705	0.160869	0.849017	0.173373	1.10835	0.244343	0.92591	0.206398	0.500848
b0731	mngA 2-O-alpha;-mannosyl-D-glycerate transporting phosphotransferase system	0.553588	1.10879	0.997521	1.88732	0.621303	0.505189	0.852808	1.12473	0.872376	0.970758	1.14611	1.54919	0.727376	0.745068	1.07565	1.40697	0.980593	0.831603	0.918768	0.861359	0.162976	0.185579	0.881904	0.262839	0.907682	0.386874	1.08513	1.47912	0.673427	0.933799	0.981891	0.766068	0.166298	0.444435	0.166818	0.194918	0.757827	1.06489	0.73907	1.11082	0.65986	1.20327	0.520114	0.723392	0.265588	1.06531	0.115518	1.19036
b0732	mngB alpha;-mannosidase	2.55553	2.23753	2.08302	2.93358	3.49365	2.85591	1.83358	1.56725	1.73245	2.06752	1.2121	LQ	1.05991	1.01144	2.1358	2.39164	1.55362	2.5891	2.54447	1.69315	2.45989	2.82801	1.22551	0.500485	1.30416	2.15005	1.75477	3.09803	1.81687	2.21976	2.34393	1.7291	1.37375	1.3763	2.28045	3.28721	2.2109	2.72587	1.68138	1.87969	1.27894	1.34266	6.51419	1.99652	1.32536	1.73594	2.304	1.17482
b0733	cydA cytochrome bd-I terminal oxidase subunit I	0.214597	0.221896	0.159092	0.163947	0.131913	0.138927	5.45814	10.9202	1.45299	1.13973	13.6794	8.31319	0.287721	0.225004	0.116614	0.331661	0.113863	0.321627	0.252506	0.0970531	0.151318	0.143581	0.188828	0.0759145	0.0754709	0.169754	0.219225	0.129206	0.210427	0.199722	0.224015	0.126554	0.202642	0.258619	0.0873509	0.0736774	0.160347	0.128757	0.12273	0.142586	0.0822324	0.228404	0.12178	0.236496	0.0901694	0.0876461	0.144327	0.116965
b0734	cydB cytochrome bd-I terminal oxidase subunit II	0.542462	0.309502	0.160075	0.192021	0.10578	0.134092	4.75782	6.7426	0.73351	0.862305	22.4362	4.27157	0.14797	1.72411	0.164943	0.26064	0.12307	0.267289	0.228929	0.146723	0.169982	0.194782	0.238108	0.0748877	0.0946953	0.110807	0.238932	0.105271	0.257115	0.144427	0.155463	0.12588	0.229036	0.279789	0.100433	0.0699289	0.156587	0.13369	0.0761754	0.144071	0.0670737	0.295291	0.0982899	0.264435	0.129678	0.0956449	0.158319	0.130365
b0735	ybgE putative lipoprotein	2.9077	1.03596	0.782254	0.450387	0.30178	0.354577	0.536057	1.13869	1.23447	0.614741	0.853629	0.742874	0.947105	2.07537	0.836978	0.962814	0.461909	0.959696	1.02759	0.896334	3.22458	3.13954	6.37545	0.654422	1.48214	0.721875	1.68751	1.21673	0.64153	0.874371	0.8116	0.489683	0.615743	0.969895	0.225042	0.327518	1.32452	0.633676	0.858168	1.17887	0.490262	1.35892	0.675664	3.14866	0.438725	0.300182	1.25735	0.347063
b0736	ybgC esterase/thioesterase	0.436699	0.883889	0.721624	0.60694	0.343494	0.449516	0.339372	0.86811	0.601072	0.455145	0.702253	1.35542	0.412839	0.553875	1.24457	0.845356	0.289913	0.394619	0.448898	0.724626	3.34763	3.57782	0.55318	0.371845	0.312787	0.3606	0.769949	0.412634	0.689286	0.652128	0.574468	0.619005	0.55864	1.07056	0.296191	0.281842	0.583702	0.397395	1.02948	0.590868	0.271026	0.759262	0.325355	0.668521	0.407466	0.56983	2.48844	0.362128
b0737	tolQ The Colicin A Import System	0.23283	0.321261	0.696683	0.250876	0.17845	0.214034	0.202734	0.865596	LQ	0.274138	0.278468	0.689501	LQ	0.213757	0.798421	0.3374	0.172288	0.238083	0.183283	0.412951	1.71138	1.69768	0.265793	0.171672	0.192625	0.0880524	0.411016	0.26665	0.325829	0.276492	0.23049	LQ	0.245326	0.344632	0.160197	0.0873499	LQ	0.203451	LQ	0.181815	0.0935654	0.336535	0.0862538	0.417082	0.123334	0.582906	1.45169	0.227111
b0738	tolR The Colicin A Import System	0.366121	0.468565	0.404689	0.275864	0.167725	0.261948	0.359395	0.378269	0.305556	0.256142	0.322332	0.18793	0.266527	0.342849	0.360478	0.47143	0.250364	0.30122	0.279753	0.425689	0.305529	LQ	0.371341	0.427688	0.292161	0.164147	0.563602	0.36926	0.653893	0.35379	0.280239	0.192332	0.523104	0.411281	0.207009	LQ	0.339558	1.47706	0.19354	0.181555	0.144452	0.643985	0.144348	0.621646	0.263528	0.295365	0.282698	0.402137
b0739	tolA The Colicin A Import System	0.442238	0.368711	0.217068	0.276848	0.158472	0.26616	0.424918	0.120928	0.251103	0.0632502	0.202571	0.135219	0.296814	0.119171	0.205578	0.371915	0.180883	0.232741	0.0999117	0.260437	0.205125	0.0950246	0.277666	0.137851	0.21119	0.124615	0.409729	0.207853	0.3804	0.220899	0.102931	0.190107	0.397254	0.404415	0.134295	0.0530421	0.2177	0.360396	0.170154	0.141923	0.129355	0.685516	0.112184	0.312768	0.159056	0.279973	0.223705	0.538324
b0740	tolB The Colicin A Import System	0.28352	0.194992	0.516354	0.148459	0.0905718	0.109109	0.121818	0.226673	0.140088	0.157296	0.122563	0.0498806	0.112836	0.179737	0.145053	0.222477	0.177314	0.190215	0.125782	0.12363	0.196596	0.120331	0.196537	0.0955119	0.24182	0.181545	0.434874	0.112889	0.241481	0.266294	0.282995	0.211499	0.238536	0.26737	0.111254	0.0725325	0.150879	0.517006	0.0649307	0.135049	0.0698836	0.232452	0.0697906	0.228171	0.08045	0.655666	0.196165	0.137193
b0741	pal The Colicin A Import System	0.222741	0.261075	0.786406	0.216258	0.154827	0.190839	0.506764	1.61898	0.267144	0.575751	0.330977	0.208108	0.212628	0.685183	0.315037	0.423401	0.296749	0.313506	0.27718	0.265565	0.267804	0.218656	0.311667	1.08242	0.204839	0.279845	0.719813	0.479652	0.503832	1.01203	0.760658	0.377687	0.692901	0.435207	0.231013	0.122747	0.233906	0.228359	0.163041	0.456318	0.124165	0.428045	0.139686	0.78586	0.173523	0.396167	1.00189	0.313955
b0742	ybgF predicted periplasmic protein	1.07496	0.937308	1.23249	0.61696	0.769233	0.386708	0.211539	0.589652	0.615749	0.442198	0.728081	0.311041	0.316663	0.375203	0.419105	0.799737	0.183741	0.39992	0.355442	0.26227	0.384154	0.363295	1.263	1.22228	0.265934	0.317334	0.516871	0.345276	1.36687	1.01837	0.874694	0.476834	0.434626	0.75682	0.192592	0.195469	0.911053	0.822499	0.238129	0.808783	0.210119	0.482035	0.228416	0.491601	0.463636	0.45274	2.32368	0.259945
b0750	nadA quinolinate synthase	0.5411	0.444693	0.736581	0.191613	0.803241	0.439014	1.67323	0.556908	4.58007	4.04214	4.19843	5.06253	3.37697	2.20226	0.630612	0.251184	0.208429	0.33492	0.360825	0.642027	0.838307	0.718269	0.275417	0.332471	0.184055	0.654748	0.287734	0.611462	0.48693	0.546553	0.578821	0.773255	0.632257	0.972229	0.664047	0.718884	0.251185	0.145626	0.369879	0.429094	0.100883	0.27118	0.166716	0.277041	0.109654	0.162212	0.183316	0.505292
b0751	pnuC PnuC NMN transporter	1.37923	0.969395	1.01162	0.976227	1.58232	1.80257	0.92315	1.16391	1.31468	1.40332	0.849155	LQ	0.987636	1.45936	0.815528	0.898325	1.04987	1.15755	LQ	0.967753	0.593771	0.659889	1.38044	1.08883	5.07218	0.640673	1.26442	0.796804	0.960207	1.28003	1.20663	0.902825	0.559464	0.944373	0.243935	LQ	0.425764	0.607475	1.93721	1.24815	0.437276	1.26032	2.22815	0.756442	0.352602	0.699533	0.647679	0.299059
b0752	zitB ZitB zinc CDF transporter	1.46034	2.0068	1.34999	0.754778	0.967382	1.51784	1.12957	0.593331	0.86902	0.848086	0.368095	0.787127	0.744138	0.748189	0.876222	0.26584	1.28381	1.07813	1.11234	1.26256	2.72904	2.83663	1.2843	0.791783	1.03414	0.324705	1.81273	1.24631	1.24745	1.03364	0.952078	1.39275	2.39596	1.74298	0.132133	0.0811411	0.968447	0.677261	1.33943	4.16496	0.655623	1.33819	1.78213	1.51778	4.40283	1.21359	0.68772	0.545448
b0753	ybgS conserved protein	1.11253	1.26962	3.08941	1.78222	1.76262	1.18116	0.570235	1.53848	1.05633	1.30898	0.559677	0.996126	0.791839	0.7205	0.979004	0.782336	1.14161	1.55451	1.46295	1.12226	1.09467	0.90601	0.732202	0.451642	0.557457	0.452002	1.15446	1.14347	1.37476	1.54199	1.5972	1.05852	2.04287	0.946507	0.475333	0.375112	0.856494	1.27586	1.06312	1.45994	1.04718	1.79385	0.62997	1.17796	0.810224	1.07385	0.868726	0.399726
b0754	aroG 2-dehydro-3-deoxyphosphoheptonate aldolase	1.23803	0.950323	1.01174	1.18099	1.05512	0.502322	0.784354	7.64531	3.08131	1.93102	2.20078	8.02271	1.1075	1.54956	1.0838	0.534518	0.763716	0.723212	0.686187	0.31977	1.00275	0.954811	0.441581	0.248895	1.575	0.795136	0.80413	0.96736	0.974951	0.950791	0.986914	0.681433	0.683096	0.815135	0.610557	0.609765	1.34662	0.689418	0.742845	0.466446	0.219555	1.00251	0.296919	0.488642	0.975684	0.456666	0.323128	0.185272
b0755	gpmA phosphoglyceromutase 1 monomer	0.271291	0.858241	0.525974	1.23938	0.238841	0.49237	42.3927	57.528	18.9123	14.0068	140.892	63.3225	11.9786	7.91526	0.433034	0.352864	0.378435	0.514305	0.520498	0.635766	2.49495	2.16064	0.733733	0.805839	0.888455	0.377324	0.950751	0.341946	1.45334	0.658035	0.597947	0.894191	0.348429	1.15959	0.135738	0.147498	0.47196	0.280407	0.135809	0.52956	0.984931	1.34866	0.183266	0.516353	2.4862	3.59904	0.272694	0.42034
b0756	galM aldose-1-epimerase	0.538246	0.976389	0.97136	1.23724	0.238564	0.391832	1.17273	5.82914	2.8651	1.99963	2.88645	6.16581	1.039	1.62484	1.14863	1.0205	0.897039	0.869771	0.822102	1.16248	0.4887	0.608673	1.53176	0.399448	0.12651	0.274234	0.820414	0.616284	0.658415	0.736134	0.759656	0.658006	0.675654	0.887777	0.151742	0.150356	0.569211	0.474424	0.291991	0.662249	0.515285	0.51607	0.872194	0.403903	0.194472	1.11333	0.542595	0.440879
b0757	galK galactokinase	0.685623	0.967636	1.36314	1.01043	0.930157	0.288069	0.812448	0.965106	0.806477	0.693372	0.465442	0.697979	0.320575	0.571571	1.03544	1.04093	0.963558	1.0461	0.940014	0.575519	0.18358	0.293565	0.41327	0.126002	0.790818	1.52179	0.691798	0.422099	1.48891	0.34291	0.447806	0.416458	0.259818	0.837098	0.10274	0.100233	0.796399	0.659849	0.416022	0.243158	1.73119	0.469248	0.462088	0.544831	0.11253	1.07005	0.155535	0.878023
b0758	galT UDP-glucose-hexose-1-phosphate uridylyltransferase [multifunctional]	1.17472	0.552902	2.05641	0.742149	1.3396	0.200388	1.08247	2.3928	1.48727	0.860057	0.663614	1.11655	0.310435	0.777075	2.03048	6.68028	0.843574	1.28446	1.0542	0.854997	1.37927	1.15834	0.167925	1.78805	0.314537	0.524021	1.54835	0.562603	2.02481	1.40047	1.54506	0.906374	0.693107	0.286532	0.065163	0.0561911	1.26706	2.8759	1.18986	0.712411	0.231881	1.26432	0.550788	1.19903	0.0844157	0.304603	0.550291	0.404481
b0759	galE UDP-glucose 4-epimerase monomer	0.316402	0.56165	0.800097	0.686612	0.184008	0.456277	0.403929	0.309071	0.432453	0.559896	0.218757	LQ	0.250747	0.481413	1.11647	0.446642	0.44721	0.689695	0.684139	0.362587	0.269252	0.266158	0.183167	0.117781	0.174894	0.101924	0.646479	0.334215	0.332635	0.249141	0.180665	0.187049	0.263716	0.353308	0.131779	0.0583084	0.241152	1.04367	0.634497	0.397755	0.473739	1.4731	0.358029	0.529328	0.0623679	0.366583	0.135419	0.220511
b0760	modF ModF	0.872804	0.839085	0.700168	0.590331	0.195051	0.584753	0.883952	0.4481	0.436688	0.518561	0.189402	0.460658	0.504156	0.366295	0.578344	0.511881	0.471631	0.489173	0.481951	0.509612	0.438562	0.451415	0.84607	0.663085	0.21919	0.299663	0.544932	0.616238	0.689245	0.496954	0.484687	0.362436	0.53789	0.565686	0.200558	0.208518	0.339811	0.30957	0.370291	0.4475	0.357875	0.659918	0.383814	0.412971	0.207595	0.577081	0.389612	0.686586
b0761	modE ModE-MoO 4 2- transcriptional dual regulator	0.552722	1.0489	1.39813	0.559098	0.291367	0.333658	1.22041	0.205368	0.909161	1.15172	0.167477	0.75809	0.350145	0.930466	1.82344	5.2423	1.38098	1.17733	1.14788	0.780214	0.641157	0.566303	0.278326	1.00598	0.192749	0.220743	0.980336	1.70116	1.31977	1.05664	1.04818	0.925453	1.85071	0.832645	0.230466	0.287085	1.17896	0.571793	1.28126	0.723484	3.10399	0.839699	0.114486	2.53808	0.933637	1.69256	0.16143	0.251815
b0762	ybhT predicted protein	1.09148	1.04035	1.08742	1.08642	0.776096	0.835465	0.966173	1.29513	0.906841	1.10487	0.904572	1.60341	1.74215	1.01681	0.91538	1.66922	0.90221	1.03627	1.10499	0.715619	1.00245	1.02818	1.72499	0.737113	0.980759	0.771459	1.25666	0.938982	1.19881	1.04504	0.927778	1.00813	1.74618	1.49654	0.839217	0.755042	0.967905	0.880407	0.916981	0.962705	0.702074	1.83344	0.74124	1.31151	1.06454	1.02597	0.823271	0.897333
b0763	modA molybdate ABC transporter	1.0641	0.581156	0.945235	0.311406	0.520238	0.903103	0.226606	0.300766	0.596864	0.883516	0.186565	0.780344	0.649342	0.270525	1.05811	0.484835	0.918162	0.561207	0.492335	1.01001	0.603683	0.508239	0.661105	0.115946	0.725003	0.372594	0.773671	1.32457	0.330968	0.941395	0.809099	1.05071	0.599393	0.800405	0.0962628	0.0857964	0.467875	0.93937	0.33276	1.13783	0.103915	1.15487	0.405387	0.552638	0.806337	1.117	0.349193	0.361662
b0764	modB molybdate ABC transporter	0.938424	0.505128	1.03297	0.327847	0.791714	0.862636	0.224699	0.99079	0.463923	1.00657	0.129543	0.484474	0.391751	0.291522	0.994837	0.276457	0.705037	0.9169	0.702914	0.395624	1.42488	1.32078	0.990858	0.141336	0.206231	0.431726	0.451342	0.396897	0.278702	0.304871	0.32603	0.759239	0.254043	0.374493	0.0878202	0.0641143	0.290316	2.49807	0.521681	0.28211	0.0880932	0.40034	0.133188	0.367655	0.31505	0.829907	0.330613	1.60371
b0765	modC molybdate ABC transporter	1.15617	0.670185	0.469114	0.456608	1.26706	0.271166	0.553862	0.994141	1.58039	1.13146	0.123735	0.940576	0.371498	0.607783	1.26722	1.20493	0.654759	1.28886	1.25737	0.874428	0.839926	0.778066	1.01136	0.0929214	0.893623	0.216127	0.651185	0.765488	1.69024	0.94651	0.959173	1.07383	0.761122	0.41524	0.120388	0.109653	1.07578	2.19447	1.69906	0.629942	0.0906976	1.11558	0.502085	1.94181	1.51727	0.432054	1.48434	0.350979
b0766	ybhA pyridoxal phosphatase / fructose 1,6-bisphosphatase	2.11155	1.07388	1.04688	0.980481	0.852745	2.4718	LQ	2.08775	LQ	1.26395	LQ	1.32038	LQ	0.867478	LQ	2.79376	LQ	1.16027	1.23779	LQ	0.739357	0.77217	2.31269	0.513275	LQ	0.564115	1.69283	0.904763	2.56812	2.20007	2.03821	LQ	1.03906	1.1374	0.223143	0.222063	LQ	1.79019	LQ	1.10148	0.999789	1.61496	0.433089	1.5559	3.29289	LQ	1.57434	LQ
b0767	pgl 6-phosphogluconolactonase	0.496001	0.728687	0.6748	0.511921	0.349048	0.441072	0.288854	0.409445	0.429418	0.629098	0.379432	0.529481	0.140088	0.424456	0.456086	0.582344	0.842013	0.956962	1.1968	0.595558	0.556278	0.666494	1.70145	0.35328	0.896768	0.839167	1.08024	0.945381	0.640886	0.530713	0.737029	2.63056	1.26323	1.00861	1.55487	2.03095	0.303972	0.608084	0.688943	0.688898	0.700535	0.664507	0.246889	0.582677	2.25559	0.277499	0.468451	0.490429
b0768	ybhD predicted DNA-binding transcriptional regulator	6.67899	3.40672	5.20304	4.50944	1.20989	6.17301	3.39946	1.60765	2.46109	LQ	3.76011	1.51018	1.2959	0.719018	3.12106	2.1644	4.30365	3.61822	2.46831	3.19769	5.52287	5.87073	4.79403	4.77556	4.42107	4.78977	2.28977	2.96372	1.33348	4.56303	4.7498	7.41634	6.48332	4.76396	1.58514	LQ	4.38042	3.73597	4.71841	3.164	6.15184	2.91718	2.88856	2.99043	20.324	1.91087	4.00865	3.2394
b0769	ybhH conserved protein	3.12618	3.68385	3.9469	5.13712	4.15962	4.96806	5.5835	2.70402	1.96142	4.16824	7.65349	4.51353	1.00571	0.438306	4.50757	2.68415	4.46262	4.34355	4.48015	4.74822	1.93155	2.05742	3.53969	1.67943	3.42526	2.46477	4.22574	4.04029	3.76991	3.64308	4.60767	3.07703	2.88745	4.11021	2.17852	3.2724	3.53995	2.16685	2.82002	4.4099	7.6266	5.40766	2.45459	4.30107	1.61894	5.70416	3.18727	3.17144
b0770	ybhI YbhI DASS Transporter	2.97551	3.89157	2.9647	3.60041	3.04812	3.52468	3.90385	2.48592	2.42539	3.82106	1.0061	4.20016	0.923955	1.47409	3.25468	2.50374	3.35519	3.7961	4.49297	3.05422	2.28653	2.49776	3.00244	3.21454	2.90947	2.50699	4.01072	3.47915	3.09851	3.64478	4.30958	2.91107	4.56362	3.82694	3.53906	4.18033	2.29546	3.40282	2.16644	3.3032	3.48247	2.84848	2.16103	3.82937	1.34888	3.8848	2.38384	2.68587
b0771	ybhJ predicted hydratase	0.903032	1.64318	1.33622	1.63295	1.24237	1.16051	2.04293	1.28556	1.48436	LQ	1.43465	LQ	0.956026	1.31784	1.59774	1.84941	1.42715	1.20385	1.32707	1.31015	1.35245	1.26838	1.35634	0.651946	1.06556	1.12639	1.55571	1.76197	1.52547	1.13251	1.42566	1.35866	1.98686	1.60035	1.42702	1.90188	1.49308	1.70826	1.93533	1.36129	0.626369	1.77529	0.832529	1.53147	1.12242	1.81266	0.882448	1.76285
b0772	ybhC esterase/thioesterase	0.686965	1.38413	1.03164	1.26121	0.660053	0.44276	1.33284	0.246946	1.04307	0.630137	0.247802	1.31452	0.716308	0.493578	0.885497	0.810411	1.14853	1.5139	1.26028	0.992998	0.749018	0.879937	0.903221	0.0985168	0.171204	0.657669	1.6229	0.598243	0.556709	0.578115	0.521908	0.944461	0.511613	1.07004	0.493994	0.477649	0.360705	0.27196	1.55692	1.44679	0.401037	1.10726	0.191401	0.80471	0.145801	1.19876	0.272029	1.36774
b0773	ybhB predicted kinase inhibitor	0.873865	1.18123	1.13311	0.660527	0.629875	0.953575	0.502355	0.669048	0.714213	0.778103	0.968997	1.26923	1.3589	0.7693	0.800951	1.99332	0.897781	0.964123	0.931175	0.599122	2.43199	2.17987	0.746564	0.336942	0.714598	1.8912	1.05868	0.497425	1.5091	0.716754	0.819628	0.931872	0.646193	1.38332	0.514039	0.580517	0.571241	0.7898	0.790919	1.28334	0.890971	1.41905	0.817533	1.07101	2.29711	0.768273	0.450737	1.26019
b0774	bioA adenosylmethionine-8-amino-7-oxononanoate aminotransferase monomer	0.556138	0.647928	0.310067	0.551987	0.113387	0.204571	0.205361	0.126227	0.210684	0.340191	0.142613	0.357464	0.146944	0.207384	0.220942	0.515441	0.409636	0.413273	0.417742	0.383993	0.210732	0.270589	0.989905	0.322649	1.06269	0.456129	0.999404	0.140657	0.753865	0.36489	0.429153	0.617302	0.501883	0.865297	1.49202	1.94247	0.159496	0.850205	0.202141	0.15948	0.160966	0.382241	0.271514	0.533444	1.31886	0.373434	0.204045	2.16232
b0775	bioB biotin synthase monomer	0.271103	0.438076	0.229893	0.197778	0.117951	0.220293	0.193416	0.142149	0.173866	0.246271	0.113092	0.150942	0.0989337	0.264783	0.174698	0.309139	0.167031	0.28764	0.284777	0.286883	0.241973	0.255604	0.666561	2.91775	0.599614	0.540278	0.907931	0.541065	0.335967	0.348652	0.450962	0.395391	0.59367	1.33505	0.186271	0.262437	0.103387	0.377627	0.107851	0.252269	0.114579	0.291862	0.113204	0.295254	0.391953	0.413573	0.190388	1.55878
b0776	bioF 8-amino-7-oxononanoate synthase monomer	0.515118	0.688308	0.716313	0.787936	0.374415	0.956485	0.14803	0.181315	0.322589	0.259033	0.553532	0.184699	0.102068	0.660997	0.376039	0.601441	0.396277	0.640985	0.596396	0.809296	0.400887	0.310982	2.13823	0.664243	1.96805	1.0514	0.986194	0.631573	0.690702	0.687441	0.768478	2.75052	2.5712	1.87215	1.20345	1.49894	0.352766	0.647981	1.037	0.360732	0.699758	0.499207	0.298322	1.09465	0.97322	0.79964	0.233111	4.99515
b0777	bioC predicted methyltransferase, enzyme of biotin synthesis	0.859634	0.847737	1.3291	0.374138	0.628211	0.279437	0.235703	0.265935	0.364023	0.436861	0.361109	0.311665	0.230587	0.604552	0.675419	0.290175	0.536102	0.342025	0.32013	0.498459	0.100457	0.149028	0.735872	2.23249	1.34057	0.548739	0.74642	0.716851	0.788155	0.454474	0.503152	2.51352	2.31088	0.951618	1.90357	1.98284	0.606398	1.28928	1.03945	0.507102	0.100791	0.358523	0.0917665	0.959072	4.18084	0.353291	0.261525	3.51422
b0778	bioD dethiobiotin synthetase monomer	0.354345	0.737033	1.08753	0.265555	0.822389	0.287501	0.290524	0.265179	0.368354	0.74768	0.344319	0.2309	0.118599	0.257091	0.250453	0.343336	0.496216	0.77085	0.631907	0.765062	0.187091	0.245742	0.335205	0.689528	2.11995	0.600385	0.607307	0.571748	0.734708	0.449796	0.48742	1.51802	0.823769	2.39386	0.496929	0.440336	0.261551	0.482851	0.109071	0.502649	0.153382	0.4498	0.135548	0.344145	0.631162	1.13505	0.342448	1.4313
b0779	uvrB DNA repair; excision nuclease subunit B	0.908943	0.629932	0.929248	0.665504	0.534739	0.692907	0.791568	0.510228	0.622694	0.93825	0.433632	0.506075	0.549202	0.668954	0.955834	0.522902	1.19262	0.758095	0.721171	0.825706	0.229328	0.244982	0.673184	0.74455	0.562771	0.432601	1.0056	1.04066	0.542761	0.660433	0.708928	0.532473	0.843214	1.50313	0.409382	0.353217	0.598033	0.174652	0.416219	1.22063	0.626788	0.588189	0.219042	0.393432	2.25506	1.13609	0.413787	0.235197
b0780	ybhK predicted transferase with NAD(P)-binding Rossmann-fold domain	1.8874	1.16955	1.82898	1.0798	1.04675	1.5617	0.919338	1.17065	1.21139	0.435735	0.258477	1.35445	0.422724	0.460916	0.984336	1.70145	0.382763	0.793717	0.810931	0.575468	0.40572	0.506687	3.87888	0.353619	0.205873	0.498437	0.756212	0.864923	1.24117	1.23238	1.52291	1.00828	2.67037	1.22278	2.92986	3.23856	1.28349	0.442592	1.36306	0.614151	0.162479	0.724691	1.803	1.27103	2.65767	0.267022	0.967334	0.322487
b0781	moaA molybdopterin biosynthesis, protein A	0.702982	0.689159	0.582281	1.06546	0.306743	1.03137	1.48115	0.999978	0.700758	1.09359	0.145284	0.747046	0.231259	0.979659	1.10628	0.48832	1.08873	1.39292	1.25214	0.923902	1.07649	1.14838	2.2685	0.148978	0.21149	0.936396	1.011	0.495542	0.999849	0.676284	0.676077	1.14461	0.59045	0.928052	0.276698	0.383014	0.392854	0.564666	0.982919	1.10983	0.227556	1.05227	0.325196	0.668226	0.27908	0.591121	0.336455	0.481213
b0782	moaB MoaB subunit	0.38065	0.555415	0.854952	1.49224	0.386345	0.427593	0.584625	0.381449	0.870948	0.657842	0.371751	0.480731	0.336429	1.0826	0.636307	1.3416	0.833964	1.33845	1.19692	0.698992	0.693325	0.658256	0.528541	2.42763	0.391696	0.564943	0.905496	1.08783	1.05189	1.02031	1.48277	0.479975	0.697064	1.11375	0.982787	0.865368	0.754814	0.270837	0.33923	1.11473	0.337535	0.811805	0.504347	0.306212	0.196152	0.570755	0.282607	2.06994
b0783	moaC molybdopterin biosynthesis, protein C	0.702345	0.474536	0.628939	0.548757	0.804183	0.470005	2.1303	0.663576	0.736944	0.485584	1.80081	1.05482	0.613228	1.00018	0.713159	0.537893	0.670695	0.763089	0.793595	0.319624	0.237963	0.333347	2.432	0.205538	0.957971	0.34635	0.889877	0.516623	0.63877	0.452516	0.551394	0.353271	0.436409	0.794315	0.306847	0.488901	0.407958	0.612545	0.448116	0.561026	1.35258	0.637139	1.34838	0.781444	0.188421	0.382412	0.312223	0.405712
b0784	moaD molybdopterin synthase small subunit	0.454745	0.592808	0.481067	0.582664	0.415919	0.452758	0.487529	0.509209	0.59218	0.691493	0.543538	0.37586	0.414415	LQ	0.533062	0.830202	0.482392	0.538451	0.731661	0.358903	0.373908	0.504621	0.712705	0.374566	0.333672	0.433818	0.752341	LQ	0.717699	0.411924	LQ	0.396056	0.851129	0.806429	0.42886	LQ	0.951124	0.950994	0.284857	0.501554	0.395769	1.0302	0.475506	0.696565	0.367975	0.397985	0.479527	0.433404
b0785	moaE molybdopterin synthase large subunit	0.422508	0.801888	0.6168	0.416385	0.228845	0.804002	2.06921	0.942078	0.435	1.00656	0.255123	0.551741	0.227134	0.329586	0.784037	0.433053	0.715971	0.578885	0.726213	0.966368	0.366893	0.443562	0.472661	0.367252	0.295138	0.293949	0.770534	0.339788	0.616843	0.391879	0.609731	0.517112	1.05749	0.886262	0.840275	1.36257	0.312415	0.434983	0.232921	0.830982	0.29692	1.25321	1.10753	0.373292	0.196412	0.467767	0.342032	0.362124
b0786	ybhL putative transport protein	4.70861	4.03713	4.34106	5.33672	4.43019	2.64111	4.40824	1.20515	2.10504	2.83113	0.704473	1.86678	0.443272	0.266769	2.69131	3.06317	2.75889	3.43398	3.4629	2.06964	2.03487	1.89764	0.406619	0.459945	0.338116	5.10638	3.80887	4.91988	4.59685	2.36501	2.91091	3.94378	3.9544	3.00017	2.81194	4.03746	3.95168	4.11537	5.71216	4.28644	2.82726	1.04925	6.58252	2.3236	0.317752	3.7663	1.423	3.84185
b0787	ybhM conserved inner membrane protein	5.14205	3.67704	4.24789	5.0871	4.26373	5.94099	2.1725	3.47677	2.32372	1.5792	2.03683	3.15017	2.70079	0.419	2.51909	2.5734	3.58551	2.47837	2.31391	3.21164	2.14549	2.13583	2.79843	6.74273	4.19399	6.26924	2.29911	3.20152	2.85189	3.15559	4.38175	3.81684	3.35949	3.80801	2.92424	5.44442	3.74218	2.01824	4.2908	2.97843	1.25538	2.39039	7.52645	3.12358	1.58283	2.57917	3.14313	2.19082
b0788	ybhN conserved inner membrane protein; predicted DNA-binding transcriptional regulator	2.30391	3.64604	1.55396	2.32985	0.775844	2.36225	0.799749	1.19124	1.33577	0.809309	1.79619	3.37184	0.28537	0.428292	1.56041	0.921012	1.19445	1.76014	1.81118	1.28996	1.7649	1.86841	1.12033	2.84155	0.461309	1.27349	1.6875	3.51686	1.69209	1.37834	1.68186	2.26723	1.2765	1.93424	6.98907	8.35792	1.29079	2.84332	1.136	1.20658	1.88904	2.26798	2.1288	2.20301	0.237835	0.648402	0.844225	2.43733
b0789	ybhO cardiolipin synthase 2	0.499823	0.858868	0.671146	0.904418	0.490581	0.41503	1.25085	0.642481	0.609965	0.613864	1.38559	0.719254	0.234807	1.01072	0.683543	0.426383	0.589949	0.48465	0.547044	0.468333	0.162158	0.242408	0.32304	0.125525	0.561336	0.716371	0.774417	0.972301	0.641647	0.830444	1.16064	0.43278	0.581644	1.1089	0.135599	0.187581	0.516304	0.18304	0.625348	0.642187	0.169434	0.484453	0.178309	0.573706	0.186703	0.587721	0.514475	0.498763
b0790	ybhP predicted DNase	0.662958	1.31967	1.42611	0.540949	0.375899	0.515566	0.707613	0.555632	0.549866	0.85493	0.644057	0.526328	0.259612	1.76196	1.05187	0.770766	0.717604	0.511931	0.644233	0.454757	0.454314	0.574331	0.666192	0.169027	0.635649	0.706262	0.893803	1.05329	0.633567	0.701588	0.892637	0.528139	0.653074	1.92014	0.138736	0.25627	0.401067	0.79466	0.30438	0.387943	0.261517	0.907246	0.815915	0.429117	0.955502	0.839587	0.504332	0.54613
b0791	ybhQ predicted inner membrane protein	1.94166	1.17299	0.554612	1.76139	0.636385	0.732816	0.452227	0.469435	0.888397	0.730941	0.318326	0.501071	0.42408	1.26251	0.878067	0.706674	0.88188	2.08664	1.62056	0.712156	0.334868	0.411816	0.469165	0.254989	1.42338	0.39682	0.845095	0.725482	2.48169	0.821618	0.961722	0.46514	0.561318	0.91477	0.181968	0.225399	1.5462	1.0312	2.40924	1.00258	0.282862	0.815251	0.861998	1.61504	0.327629	0.882711	0.400242	0.524401
b0792	ybhR YbhF/YbhR/YbhS ABC transporter	1.89658	1.10669	1.13004	1.00121	0.471191	2.29213	0.24458	0.484836	0.517383	0.875244	0.268958	0.731299	0.196144	1.00911	0.987013	0.391697	0.507878	1.3346	1.2974	0.881185	0.497932	0.507283	1.1932	1.47814	1.56262	0.579874	1.07487	0.758868	1.22583	0.674065	0.872891	0.92504	0.649496	1.62944	0.262173	0.248209	0.909175	0.893786	0.894029	0.904351	0.267917	0.912876	1.1398	0.821221	0.247851	2.23154	0.524746	0.300802
b0793	ybhS YbhF/YbhR/YbhS ABC transporter	1.41147	1.21959	0.97971	1.27488	0.448469	1.6095	1.25584	0.511422	0.555484	0.581321	0.144664	0.65689	0.1676	0.440704	1.04503	0.918374	0.796746	0.799441	0.809308	1.11423	0.292441	0.333473	2.93353	1.114	0.1593	0.92238	1.42659	2.25596	1.2058	0.990286	1.31245	1.16735	0.74432	1.51154	0.276375	0.334456	0.936451	1.32182	0.994899	0.735237	0.811788	0.645932	1.59408	0.897345	0.336135	1.90516	0.735796	0.639716
b0794	ybhF YbhF/YbhR/YbhS ABC transporter	1.00921	0.784958	0.524714	0.717558	0.334017	1.11852	1.12624	0.27404	0.663921	0.836586	0.319897	0.2585	0.233529	1.05247	0.963355	1.09292	0.975086	1.0917	1.19637	1.03959	0.369071	0.401574	1.07584	0.473676	0.681376	0.41392	1.30681	0.481562	0.636704	0.553459	0.575387	0.870984	0.644607	1.00241	0.188705	0.193258	0.603256	0.370139	0.555266	0.730764	0.249104	1.04783	0.487497	0.570791	1.09571	0.973269	0.529048	0.382909
b0795	ybhG predicted membrane fusion protein	0.358656	0.852525	0.635697	0.340747	0.357191	0.58053	1.33135	0.664726	0.658989	0.674642	0.205144	0.549108	0.149984	1.17808	1.33492	0.389645	1.24846	1.11077	1.00862	1.54579	1.01421	1.2135	0.573669	0.109405	0.211193	0.523821	1.2265	0.3744	1.49997	0.773325	0.719326	0.716779	0.439683	1.20373	0.435731	0.389985	0.529922	0.481642	1.33983	1.34071	0.792041	0.908671	0.126273	0.505452	0.152273	0.362658	0.910076	1.63276
b0796	ybiH predicted DNA-binding transcriptional regulator	0.619231	0.766383	0.627854	0.367744	0.355012	1.01208	0.599956	0.854969	0.883423	0.943665	0.985678	0.41242	0.621635	0.70164	0.935488	2.29496	0.900885	0.996548	0.978041	1.47379	1.19556	1.51775	0.611525	0.199708	0.619275	0.291445	1.07428	1.05181	1.0426	0.70955	0.708604	0.818319	0.607527	0.981857	2.41202	2.70044	0.697342	0.667736	2.4223	0.686035	0.266457	0.7411	0.193696	1.09488	0.191409	0.376615	1.32989	0.724421
b0797	rhlE DEAD-box-containing ATP-dependent RNA helicase family member	0.685504	0.971316	0.739812	0.752317	0.449798	0.569521	0.337405	0.603059	0.7509	0.724872	0.186675	0.369647	0.581335	1.06583	0.839879	0.668479	0.517748	0.788962	0.78048	0.509329	1.12863	1.28852	0.340553	0.130724	0.958991	0.232183	0.673798	0.494601	1.32389	0.956179	0.918669	0.364093	0.461851	0.539129	0.264099	0.208527	0.779714	0.690064	0.769717	0.324755	1.31638	1.03704	0.440043	0.898177	0.12222	0.81494	0.252804	0.347953
b0798	ybiA conserved protein	1.28485	LQ	1.18443	2.25072	0.975744	1.23118	0.410656	1.44522	0.841276	0.601721	4.30027	1.51252	0.706037	2.228	1.15771	1.11791	1.21899	0.463213	0.518868	0.981453	3.27426	3.44408	0.5799	0.388565	2.05209	1.77605	0.841991	0.757111	1.04096	1.25981	1.24216	0.882472	0.715046	0.656905	0.287282	0.277925	2.18596	0.898681	1.49522	0.48528	2.63364	0.8747	1.37535	1.627	0.285711	0.471847	1.77336	0.513718
b0799	dinG ATP-dependent helicase	0.533715	0.672875	0.817596	0.767138	0.456735	0.48445	0.426716	0.694598	0.812846	0.553373	0.149381	0.550088	0.459874	0.772889	0.666586	0.503427	0.557837	0.615222	0.492061	0.386672	0.498026	0.550427	0.455303	0.893986	1.50495	0.982896	0.759322	0.533754	0.900081	0.542728	0.510007	0.329768	0.584728	0.581809	0.20548	0.196199	0.605726	0.998323	0.721698	0.498024	0.505505	0.70242	0.368244	0.738717	0.264182	0.658821	0.318967	0.17981
b0800	ybiB predicted transferase/phosphorylase	0.437753	0.582699	1.0587	0.772611	0.483629	0.307061	0.528556	0.471074	0.386333	0.570711	0.573897	0.429457	0.396765	1.23062	1.02084	1.85181	0.58399	0.616581	0.556352	0.632826	0.92751	0.822469	0.448739	1.41815	0.283178	0.249551	0.738463	0.629341	0.491592	0.526682	0.612065	0.446404	0.377752	0.725453	0.254764	0.35247	0.627308	0.546507	0.241915	0.804344	1.086	0.687812	0.169003	0.726054	0.438375	0.336353	0.224701	0.206613
b0801	ybiC predicted dehydrogenase	0.611775	0.710383	0.564071	2.39199	0.104043	0.457483	0.409049	0.363875	0.938282	0.729703	0.18767	2.311	0.355674	1.06606	1.07276	1.64013	0.735475	0.805059	0.919981	0.883901	0.353762	0.437016	0.386263	1.04117	1.62034	0.114392	1.0313	1.22556	1.68779	1.5833	1.85462	0.621111	0.434842	0.329492	1.74385	2.07865	0.692801	0.702453	0.896896	0.465705	0.730991	0.973563	0.256281	0.530752	2.13447	1.25813	0.449452	0.490254
b0802	ybiJ predicted protein	0.936321	0.760488	0.823385	0.850092	0.357081	0.702934	0.997015	0.805331	0.669659	0.832958	1.02796	1.15594	0.641035	0.843561	0.709194	0.84086	0.864668	0.697531	0.904541	0.952625	0.567777	0.744683	0.822674	1.36126	0.520297	0.539848	0.782107	0.623167	0.704022	0.617193	0.750444	0.546169	0.833679	0.80399	0.353794	0.461653	0.67183	0.583197	0.510285	0.529052	0.486087	0.927311	0.442108	0.694963	0.42394	0.756662	0.525676	0.684289
b0803	ybiI conserved protein	0.611861	0.722845	0.932105	0.961511	0.346183	0.481105	0.597676	0.727388	0.584585	0.761059	0.486099	0.688855	0.778841	0.71017	0.581929	0.771981	0.765042	0.596303	0.751778	0.569801	0.399812	0.558548	0.525021	0.366642	0.598473	0.456039	0.794109	0.439008	0.626276	0.612237	0.775936	0.658169	0.750704	1.71724	0.267583	0.343379	0.511537	0.902599	0.459898	0.760168	0.705924	1.03484	0.589988	0.627092	0.349365	0.623803	0.521721	0.529564
b0804	ybiX conserved protein	0.701101	0.767927	0.716335	0.612693	0.282039	0.497741	0.93067	1.328	1.14705	0.747782	0.214295	0.847124	0.607584	0.734856	0.631655	0.362378	0.522867	0.531752	0.509811	0.441653	0.180041	0.217057	0.31728	0.210827	0.818035	0.192554	0.594796	0.441854	0.460811	0.504782	0.628304	0.612067	0.84505	1.60691	0.147693	LQ	0.735742	0.558618	0.516216	0.333196	0.22133	1.86985	0.201377	0.497502	0.120464	1.17817	0.279706	0.945983
b0805	fiu putative outer membrane receptor for iron transport	0.587571	0.892186	1.99544	1.11111	0.941898	1.06455	0.784369	0.535706	0.625896	1.42459	0.489545	0.688236	0.608041	0.611114	0.587658	0.506537	0.446724	0.738054	0.664934	1.34954	0.500392	0.467103	0.906453	0.279722	0.616298	0.92346	1.0898	0.383632	0.904792	1.10437	1.0912	0.701072	0.545137	0.685678	0.247285	0.298594	0.556987	0.789532	0.719858	0.498814	0.383301	1.66805	0.252485	0.891173	0.271075	1.28347	0.384253	0.687015
b0806	ybiM predicted protein	0.437775	0.699544	1.12895	0.923414	2.22347	0.857166	0.370098	0.648881	0.502148	0.578609	0.32223	0.491504	0.856984	0.461086	0.706229	0.732123	0.463025	0.784975	0.854089	0.486258	0.382011	0.560453	0.688779	1.57297	1.64906	0.486314	0.735713	0.838101	0.555336	0.769907	0.792625	0.758719	0.607178	1.04218	0.217919	0.325539	0.525294	0.454524	0.291885	0.692844	0.689037	0.879578	0.449592	0.818689	0.376702	0.843513	0.580992	1.49423
b0807	ybiN predicted SAM-dependent methyltransferase	0.846509	LQ	1.33717	1.16324	0.321094	0.476418	0.965524	0.449235	0.740778	0.816115	0.308314	0.730768	0.491799	0.420516	1.14254	1.70733	0.559942	0.919712	0.754541	1.04137	0.595648	0.538936	0.612675	0.805255	0.312622	0.945968	0.767241	1.3333	1.36232	1.00079	0.921154	0.94108	0.459333	1.3115	1.1099	1.25618	0.871795	1.00072	0.753287	0.870192	2.3156	1.34003	0.80472	0.607645	0.970276	1.83848	0.385338	0.722798
b0808	ybiO predicted mechanosensitive channel	1.02994	1.01593	1.44253	0.813807	0.839763	0.799618	0.887869	0.746036	LQ	1.05223	0.743147	1.31884	LQ	0.929475	1.24258	0.435472	0.952686	0.809561	0.778802	0.598884	0.683035	0.605789	0.724486	0.381149	0.887893	0.842408	1.13231	1.15167	0.963245	0.816577	0.795805	0.943408	1.79357	1.30564	0.759366	0.884258	0.714808	0.392678	0.402351	1.03257	0.908361	1.29102	1.0893	1.80218	0.247623	1.17597	0.708399	0.817399
b0809	glnQ glutamine ABC transporter	0.435455	0.360946	0.899951	0.644212	0.167631	0.293191	0.300618	0.354508	0.435106	0.618911	0.158936	0.283966	0.980689	0.413	0.548892	1.69703	0.490999	0.65426	0.544203	0.821604	0.400349	0.403917	0.455145	0.177301	0.194977	0.57868	0.411568	0.288231	0.288033	0.512901	0.566609	0.280785	0.663832	0.37399	0.349458	0.399483	0.395527	0.442211	0.136699	0.489318	0.217277	0.593589	0.21681	0.677869	1.2175	0.325192	0.201273	0.552373
b0810	glnP glutamine ABC transporter	0.853432	0.710029	0.632773	1.4846	0.162919	0.319109	0.43206	0.421238	0.476872	0.635417	0.222185	0.636557	0.241996	0.382651	0.472735	0.261111	0.575256	0.790809	0.767017	0.361318	0.309241	0.443795	1.51771	0.465188	0.16673	0.173364	0.741442	0.148891	0.249282	0.517092	0.634196	0.576918	0.932445	0.311494	1.36475	1.49583	0.644682	0.222457	0.308726	0.562377	0.0955295	LQ	0.236458	0.518713	0.184477	0.532907	0.472482	0.302553
b0811	glnH glutamine ABC transporter	0.832595	1.09743	0.691635	1.64568	0.387209	1.1092	1.18656	1.30463	1.16766	0.653348	0.194174	1.10965	1.1686	0.677998	0.804443	2.08324	1.42839	0.890374	0.849649	0.953512	0.395661	0.415867	0.75894	0.855409	1.2814	1.50458	0.869138	1.49225	0.924476	2.27922	1.80274	1.27258	0.560144	1.11124	0.15832	0.227101	1.35433	1.26963	1.39882	1.06765	0.225891	0.922481	0.85019	0.675621	0.343276	0.29507	0.93288	1.81695
b0812	dps stationary phase nucleoid protein that sequesters iron and protects DNA from damage	2.04147	1.38522	1.39405	1.49193	2.02889	1.33142	1.94686	0.7546	1.17747	0.970081	0.777593	0.958664	1.00226	0.739045	1.74959	1.437	1.0419	1.27814	1.35785	2.30854	1.5867	1.52059	0.624928	0.766427	1.47749	1.66752	1.45756	1.75369	1.62496	1.49337	1.46211	1.41076	1.28496	1.63584	1.89838	2.01885	2.21906	2.04992	3.1831	1.15131	0.41309	1.82941	2.02496	2.26373	1.04148	0.333061	1.60208	1.14435
b0813	rhtA threonine and homoserine exporter	0.781202	1.10017	0.806594	1.39219	0.704399	1.00735	1.14903	0.881543	0.758244	1.08121	0.575931	LQ	1.21201	0.832832	0.966645	1.10758	0.800175	1.00617	1.11401	1.15484	0.692032	0.779419	0.81531	0.820604	1.6851	0.729053	1.28616	0.729388	1.31437	0.899683	0.884367	1.03969	1.24812	1.27507	0.554624	0.615844	0.812236	1.14973	0.880326	1.09874	1.46771	1.5892	0.677553	1.57541	1.83684	1.1442	0.839196	0.64429
b0814	ompX outer membrane protein X	0.807758	0.823321	0.685637	0.359517	0.254069	1.89797	0.435793	0.767113	0.680782	0.732424	0.418916	0.833212	0.537176	0.510591	0.515461	0.498415	0.550081	0.534447	0.505139	0.481866	1.09033	1.05953	0.402227	0.246077	2.52499	0.32532	0.728024	0.683481	0.488077	0.81251	0.776599	0.869235	0.522802	0.953625	4.83441	5.60034	0.709035	0.902467	0.315104	1.24438	0.230208	0.627503	0.448353	0.990845	0.256035	0.61249	1.73261	0.448201
b0815	ybiP predicted hydrolase, inner membrane	1.23252	1.68578	1.26343	0.883306	0.345738	2.79169	0.663801	0.947778	1.28347	0.419835	0.340085	LQ	1.23627	LQ	0.868313	0.629426	1.19156	1.00937	0.959024	0.968167	0.398288	0.508092	0.40633	0.583196	0.684453	1.51545	0.743272	0.97952	1.75062	1.7097	LQ	1.16247	0.291368	0.407397	0.194531	LQ	2.21721	1.02913	1.29082	0.82679	0.0731295	0.450462	1.41395	1.20503	0.302716	1.22439	0.399509	0.609389
b0816	yliL predicted protein	1.06079	1.36629	1.21499	1.46167	0.463204	2.44887	0.573141	0.975892	1.28874	0.748975	0.58607	0.76261	1.11678	0.718422	0.782471	1.67787	0.750382	0.906877	0.881002	0.743035	4.47394	3.33391	0.878119	2.84338	0.729852	3.22502	1.02281	1.6109	1.31359	1.3177	1.3718	1.41974	1.029	0.986252	1.02206	1.13386	2.33711	3.67659	0.929552	1.41265	0.447382	1.35339	3.93967	1.45083	3.73971	0.656529	1.39412	1.1137
b0817	mntR MntR transcriptional repressor	1.13889	1.02232	1.12212	1.01951	0.995032	0.57535	1.89728	0.789869	1.14948	0.756509	0.836795	1.07309	0.328646	0.743997	1.16601	2.2409	0.957382	0.664241	0.795559	0.533487	1.02514	0.930935	1.72014	0.951788	0.368968	0.628122	1.06894	1.36006	1.30426	1.53847	1.75125	0.662902	1.77305	0.749937	0.418346	0.503261	1.45975	1.27215	1.20519	0.743911	0.525534	1.0477	1.58511	1.04061	0.49621	1.45389	0.627494	0.336274
b0818	ybiR predicted transporter	1.1332	1.62677	1.25139	1.69615	0.353555	1.09109	0.545977	0.612324	0.483921	0.705016	0.453761	0.432915	0.348586	1.39025	0.587357	0.7312	0.622974	0.678854	0.573897	0.787977	0.353799	0.369017	0.569136	1.85438	0.188146	0.257427	0.769677	0.780293	0.897918	0.917247	1.08199	0.462442	0.642525	0.792537	0.448944	0.490427	0.416046	1.0543	0.961665	0.505382	2.01809	0.86056	1.53374	0.424779	0.188922	0.429134	0.210703	0.31062
b0819	ybiS conserved protein	2.45006	2.6634	2.58211	2.28976	0.901152	2.28422	1.16896	0.687182	1.5503	2.37207	0.376848	0.986236	1.22941	2.14528	1.09935	1.70263	2.08917	2.66715	2.25144	1.20096	0.497724	0.562434	0.651477	0.311163	1.20163	1.94498	2.2946	2.23866	1.85398	1.39576	1.49964	0.820613	0.599531	0.884816	3.76894	3.36424	1.59445	1.29529	1.79048	2.26272	1.15327	0.836998	4.03845	1.20165	0.286709	2.45508	0.385735	0.589022
b0820	ybiT putative ATP-binding component of a transport system	0.392163	1.3279	0.692471	0.896335	0.456728	0.824827	0.720657	1.09086	LQ	0.897109	0.801479	0.788842	LQ	1.45809	0.960366	1.02395	0.996428	1.03928	0.813264	0.596326	0.849617	0.8907	0.488578	0.490365	0.560604	1.02554	1.01617	1.09642	0.968825	0.65638	0.601803	0.722862	0.403549	0.63862	1.14097	0.927857	LQ	0.812304	LQ	0.462369	0.229549	0.924155	0.941153	0.810448	0.146586	0.8798	0.341705	0.740104
b0821	ybiU predicted protein	0.421105	0.872136	1.09812	0.373904	0.594179	0.291944	0.606332	0.611962	0.699389	0.673745	0.953071	0.752872	0.320948	0.79649	0.589145	0.689593	1.09149	0.813755	0.776989	0.517973	0.454826	0.421753	0.507455	0.367979	0.22249	0.325984	0.880865	0.461798	0.774291	0.376588	0.479023	0.374156	1.14548	1.03573	0.190775	0.266322	0.516837	1.29315	0.768772	0.568372	0.165342	0.827139	0.496008	0.594419	0.326049	0.606657	0.369423	0.460181
b0822	ybiV sugar phosphatase	0.404242	0.800931	1.81921	0.93143	0.84846	1.37777	0.794521	0.591633	1.07226	0.838046	0.34953	0.492005	1.23709	0.673544	1.41451	0.972014	0.971651	1.0112	0.877135	0.781926	0.45977	0.428882	0.580935	0.245526	0.752715	1.67017	1.62388	1.37961	1.28497	0.932258	0.90148	1.06954	0.617422	1.3408	0.171235	0.284959	1.2495	1.2058	0.839131	0.710572	0.488588	1.91856	0.634069	1.6155	0.82866	0.973366	0.317262	0.343888
b0823	ybiW predicted pyruvate formate lyase	0.566785	0.742774	0.480585	0.94794	0.61403	0.459773	0.999446	0.759772	1.07258	0.623649	0.0863923	0.957324	0.256923	0.615037	0.707851	0.924875	0.865461	0.832315	0.898381	0.791834	0.36412	0.419395	0.439598	0.428289	0.39693	0.376923	0.909131	0.394132	0.620162	0.562107	0.659291	0.408143	0.284761	0.546276	0.0633363	0.0716292	0.563013	0.727442	0.649141	0.497813	0.808232	0.515002	0.254036	0.51994	1.31098	0.589872	0.656321	1.35649
b0824	ybiY predicted pyruvate formate lyase activating enzyme	0.387936	0.65304	0.428057	0.824107	0.47569	1.23656	1.57014	0.920986	0.864775	0.78498	0.60584	0.270228	0.352061	1.40365	1.05897	0.58066	0.766837	0.965552	1.13639	0.489702	0.351654	0.384613	0.394948	0.167701	0.285581	0.313197	1.21569	0.330132	1.00319	0.475717	0.509171	0.993789	0.462422	0.40538	0.117162	0.136195	0.516386	0.718191	0.524862	0.434544	0.148793	0.505735	1.0818	1.20455	0.191873	0.312099	0.32362	1.45689
b0825	fsaA Fsa	0.664463	0.664726	1.35653	1.02826	0.24149	0.222398	0.665497	0.263472	0.885045	0.806988	0.310724	0.442847	0.499676	1.34608	0.737054	0.516757	0.743681	0.723583	0.897497	0.668842	0.549231	0.676758	0.879909	0.327881	1.23338	0.409818	0.844786	2.32615	0.788489	0.708129	0.697349	0.779876	0.327778	1.01765	0.397055	0.490014	0.619782	0.55007	1.64913	0.40908	1.12486	1.85215	0.143721	1.11541	0.290825	0.554048	0.998482	1.05701
b0826	moeB molybdopterin biosynthesis	1.29303	1.26022	1.63739	1.30904	0.699067	0.264839	1.07375	0.454195	1.04276	1.28172	0.338163	0.654829	0.40578	2.90401	0.733771	0.625827	0.757544	1.09287	0.916607	1.13562	1.94464	1.74788	0.651843	0.866628	2.63441	0.266295	0.993648	1.50636	1.21109	1.05685	1.13003	1.43204	0.947505	1.46986	0.50149	0.679739	1.29457	0.569532	0.67841	0.906496	2.01632	1.15286	0.870677	0.546316	2.46783	0.605349	0.210291	0.905845
b0827	moeA molybdopterin biosynthesis	0.656231	0.595632	0.733682	0.665991	0.287451	0.583945	0.622651	0.331291	0.617836	1.04037	0.206436	0.358349	0.408965	0.918657	0.872093	0.991677	0.570626	0.838344	0.694122	0.520174	0.376637	0.485026	1.08886	0.897697	0.335002	0.73383	0.67416	0.381237	0.465637	0.595782	0.619333	0.608828	1.16336	1.13377	0.7788	0.830056	0.328491	0.340054	0.399157	0.568561	0.44988	1.08705	0.448519	0.637201	1.73721	0.845373	0.240877	1.14669
b0828	iaaA beta; cleavage product of IaaA	0.442434	0.753045	0.713389	1.52645	0.53029	0.458723	1.07109	1.16292	0.63422	1.02644	0.602866	0.482434	0.583497	0.746034	1.16495	0.535802	0.528555	0.552516	0.573425	0.830704	0.966717	1.07583	0.665137	0.223516	1.09258	0.289111	1.13818	0.584682	0.8171	0.914466	1.096	0.451731	0.57443	0.958669	0.212416	0.204073	0.360016	0.580047	0.150593	0.869788	1.39498	1.54192	0.735178	0.60147	0.360065	0.646395	0.322996	0.321507
b0829	gsiA gsiABCD glutathione ABC transporter	1.08959	1.12956	1.17556	1.0533	0.86845	0.628498	0.900253	0.587405	0.929281	0.976628	0.627842	0.854011	0.593238	1.60506	1.36175	1.08744	0.811331	0.6936	0.761696	1.0597	0.679032	0.995098	0.535013	0.503661	0.165533	0.689895	1.2826	0.887895	1.00137	0.788577	0.864117	0.844358	0.772154	0.870949	0.219754	0.333841	0.8924	0.749391	1.1381	0.844243	0.472066	1.02664	0.298095	0.663242	0.130157	1.12194	0.489622	1.19533
b0830	gsiB gsiABCD glutathione ABC transporter	0.520176	1.30687	1.44168	1.21783	0.165911	0.537095	0.691017	0.438537	1.08565	1.33833	0.158085	0.589751	0.444959	1.0303	0.938458	0.353041	0.889181	0.527633	0.500239	0.816108	0.577733	0.592639	1.46945	0.384443	1.51858	0.238386	1.17187	1.23913	1.30723	0.786132	0.75586	1.12125	0.433521	1.21712	1.07203	0.971289	0.611572	0.955345	0.769831	0.629402	0.857537	1.31032	2.13927	0.411351	0.119613	1.44758	0.231599	1.13746
b0831	gsiC gsiABCD glutathione ABC transporter	1.28503	0.815328	0.959168	0.679513	0.249427	0.631972	0.643216	0.750105	0.677444	1.40484	0.616068	0.945286	0.234558	0.827851	1.3766	0.471336	0.987193	0.730671	0.801657	1.09384	0.811001	0.816548	1.81945	0.878978	4.29443	0.392691	1.49824	0.38925	0.417374	0.990157	1.04081	0.598569	1.33374	0.641211	0.317341	0.282969	0.45149	1.76462	1.06104	0.766935	0.233857	1.36745	0.440305	0.53603	0.103178	0.728793	0.936201	1.1096
b0832	gsiD gsiABCD glutathione ABC transporter	1.42423	1.11656	0.533415	1.95783	1.48256	1.38544	0.350836	1.57315	0.968663	0.676669	1.89707	0.648227	0.671501	0.369652	1.50176	0.409167	1.91379	0.942254	0.952573	1.83867	0.689705	0.771228	0.613395	0.551548	0.24697	0.441788	1.21064	0.8361	1.4549	1.01064	0.888836	1.47409	0.330672	0.930937	0.279172	0.266396	0.601266	1.97163	0.809777	2.44692	0.199731	2.02297	0.250909	0.903496	0.11592	1.4304	1.17511	0.781231
b0834	yliF putative lipoprotein	9.54891	6.80558	8.94282	9.29786	12.7201	8.86342	5.24526	4.87824	4.60758	5.51848	8.83388	8.99276	6.27782	2.93799	7.21181	8.15918	7.65344	7.826	6.8628	9.83619	8.79559	7.62984	5.9402	12.4549	4.37665	15.1598	7.31914	9.43179	7.97331	7.93554	8.43558	11.3822	12.6063	5.74122	12.1426	12.6321	8.12544	6.22588	5.19071	11.5534	16.2714	7.79866	14.6886	7.19499	1.10309	8.21811	11.2307	7.59696
b0835	yliG predicted SAM-dependent methylase	0.856998	1.09454	1.62617	0.952817	1.12763	1.11353	1.26124	1.00622	1.06422	1.40197	0.443272	0.963947	0.598834	0.726011	0.941919	0.417586	0.94123	0.906426	1.01825	1.11246	1.33822	1.61879	0.416875	0.877154	1.87028	0.945532	1.16288	0.638951	1.32307	1.1962	1.26464	0.758726	0.787433	0.758579	1.84653	1.9866	0.664564	0.56883	0.62908	1.34703	0.761003	1.48467	0.580731	0.701483	1.76556	2.16303	0.589133	0.822433
b0836	bssR regulator of biofilm formation	0.979515	0.769811	0.404889	0.574927	0.367749	0.366322	0.554951	0.510664	0.862771	LQ	0.511997	0.436897	0.640281	1.35305	0.952525	0.51392	0.736109	0.608798	0.658338	0.64818	1.5937	1.39158	0.536037	2.2791	0.45209	0.935754	0.824941	0.843194	0.889864	0.961077	0.829719	0.709705	0.862711	0.655523	0.511606	0.574788	0.5449	1.28332	1.6499	0.901532	0.307063	0.743515	0.297212	0.741263	0.835752	0.783928	1.54138	0.657512
b0837	yliI aldose sugar dehydrogenase	0.934887	0.798087	0.604997	0.875298	0.735791	0.857212	0.411307	0.77487	0.549175	0.754135	1.32178	0.332027	1.09957	0.724465	0.927419	0.905176	0.835173	0.781273	0.74261	0.308497	0.778537	0.9074	0.921545	0.800929	1.18419	1.27	1.27603	0.769135	1.08388	1.09939	1.25021	0.674654	0.462997	1.31184	0.231311	0.291157	0.758976	0.710873	0.608322	1.09994	1.06714	0.935373	1.28483	0.976233	0.611703	1.10083	0.454673	0.546115
b0838	yliJ predicted glutathione S-transferase	2.05414	2.50659	1.91615	2.28175	0.923941	1.88715	2.09388	0.901682	1.2841	0.948931	0.310022	0.838282	0.312997	0.532595	1.82719	0.853723	1.34725	1.29949	1.1349	1.00473	2.18784	1.95624	0.383411	0.337176	3.43442	2.08387	2.18025	1.4952	2.22353	2.09703	1.89316	1.23555	2.66081	1.56607	1.61508	1.57645	2.17723	0.386592	1.20487	1.02626	0.840383	0.78699	1.60611	0.733809	0.143814	0.95409	0.353313	0.935973
b0839	dacC penicillin-binding protein 6	0.951719	0.78689	0.813606	0.601919	0.629073	1.09812	0.731934	0.897355	0.572885	0.737473	0.894955	0.285889	0.220595	0.297709	0.465336	0.420319	0.366333	0.641991	0.702938	0.398209	0.210541	0.244509	0.547175	0.942117	0.22304	0.666561	0.86193	1.59842	0.787002	1.21232	1.12168	0.68211	0.366254	0.675085	0.239926	0.330824	0.859261	0.276528	0.363926	1.01469	2.22518	0.950693	0.929147	1.33842	0.128849	0.477759	0.522717	1.23078
b0840	deoR DeoR transcriptional repressor	0.259638	0.527523	0.772245	1.04854	0.11663	0.270639	0.159661	0.430901	0.970779	0.467289	0.345764	0.278808	0.273491	0.328508	0.478635	0.930709	0.981441	0.304783	0.412959	0.279284	0.44064	0.463153	0.461228	0.1553	0.518548	0.931566	1.14133	0.78475	0.648203	0.435733	0.490899	0.64242	0.571048	1.16484	0.206839	0.38011	0.538074	1.54191	2.32536	1.25081	0.28591	0.841762	0.182432	1.36479	0.144053	1.94776	0.206544	1.87139
b0841	ybjG undecaprenyl pyrophosphate phosphatase	0.558169	1.08864	0.657345	0.833936	0.224892	0.723577	0.356125	0.706632	0.708447	0.554915	0.266246	0.410411	0.650032	0.410224	0.478667	0.807901	0.668888	0.731478	0.681421	0.348728	0.715658	0.677842	0.864875	0.52525	1.98496	1.70686	0.86441	1.40989	1.34688	1.17933	1.11321	0.920853	0.723141	0.952729	4.41452	3.67053	1.07068	1.67593	1.51668	1.05876	0.229858	0.710713	0.961609	0.902285	0.670825	0.402968	0.857259	0.924128
b0842	cmr MdfA/Cmr MFS multidrug transporter	0.81749	1.36582	0.96432	1.89816	0.263701	1.06197	0.44788	0.442247	0.534117	0.737158	0.168664	0.949517	0.539691	0.986926	1.10103	1.40136	1.45533	0.929601	0.853422	0.760265	1.44028	1.50702	1.88547	1.0416	1.86367	0.399964	1.24386	1.72813	1.33081	0.843332	0.879814	1.10466	2.21176	1.58228	1.14116	1.2061	0.888637	1.62896	1.22114	0.841171	0.420092	1.00784	1.32921	1.51952	0.130217	1.16809	1.04708	0.193075
b0843	ybjH predicted protein	1.00549	0.99029	1.27799	1.43614	1.10459	1.28585	1.08656	0.812611	0.856251	0.916162	0.629119	1.36966	0.85592	0.872357	0.775029	0.8612	1.21565	0.677117	1.04978	0.916853	0.494078	0.91022	0.861902	1.20532	1.52618	0.614373	1.1868	0.624078	1.61113	1.01205	0.975822	0.96097	2.80491	0.960128	0.269394	0.561731	0.970697	0.813214	1.18432	0.657866	0.615719	1.31421	0.441099	0.652093	0.366542	0.701901	1.454	0.541558
b0844	ybjI FMN phosphatase	2.05311	2.42539	1.45629	2.17871	0.953277	3.23641	1.41555	0.621013	1.04154	2.11266	2.65964	0.909358	1.45933	0.584474	1.36844	0.85242	1.59172	1.47629	1.24494	1.18417	0.969226	0.955436	0.454829	0.335052	3.41354	3.70137	2.05227	1.27582	1.31674	1.68868	1.6008	1.48453	0.892242	1.61249	0.520318	0.461757	1.38016	2.19315	0.871327	2.31681	1.62845	2.84048	2.07974	0.62174	0.278619	1.65928	2.84376	0.678319
b0845	ybjJ predicted transporter	1.09577	0.919145	1.58726	1.5258	0.337151	0.704169	1.22406	0.611049	0.724801	0.647263	0.357842	0.283839	0.273589	0.276232	0.675328	0.85774	0.968329	1.47311	1.47575	1.16796	1.35964	1.54799	0.442233	0.60542	0.595087	0.322661	1.61277	0.978529	0.674215	1.30543	1.24911	0.611057	0.608893	2.34475	0.113734	0.138415	0.60073	0.740223	0.534011	0.761044	0.507419	1.35048	0.503129	1.34973	0.167064	0.49501	0.946374	0.970517
b0846	ybjK predicted DNA-binding transcriptional regulator	0.636016	0.969085	0.682297	1.54812	0.393161	0.653865	0.40685	0.993061	0.519477	0.830566	0.33613	0.575308	0.590671	0.603335	0.752594	0.970366	0.717782	0.666603	0.659978	1.2372	0.879099	0.870959	0.733466	0.311456	1.02994	0.362755	1.15706	0.804098	0.623195	0.721079	0.863918	0.666951	1.06875	0.879167	0.271105	0.297578	0.438623	0.844219	0.463332	0.534273	0.315148	0.860951	0.410741	1.04651	0.366351	1.27362	0.472175	0.867047
b0847	ybjL predicted transporter	1.73171	1.28607	0.967341	1.42019	1.19647	0.843763	0.229067	0.720101	0.7297	0.901702	0.303905	0.6863	0.632447	0.486604	1.21272	0.405691	0.796112	0.84636	0.827626	0.841567	0.410792	0.496478	0.612039	0.183447	0.680692	0.575043	0.871896	0.689194	0.714006	1.31723	1.47121	1.29193	1.26902	2.20647	0.269188	0.360628	0.794394	0.715116	0.697815	1.29252	0.438143	1.30296	0.407225	0.919479	0.35101	1.26189	0.601261	0.944759
b0848	ybjM predicted inner membrane protein	1.66438	2.3951	2.09047	1.51529	2.55459	1.7232	0.719427	0.726159	1.21853	1.10162	0.809243	1.5773	LQ	0.525496	1.69131	0.938336	1.3758	1.64484	1.41203	1.71364	1.79848	1.62545	1.18681	0.622467	0.731306	1.16926	1.64287	1.94916	1.7841	1.421	1.352	1.33254	1.01047	0.963224	0.431801	0.433374	1.68238	2.15521	1.77324	1.08843	2.43323	1.29441	3.54175	2.91012	0.646914	0.63529	1.64968	0.896726
b0849	grxA oxidized glutaredoxin 1	3.70453	1.2404	1.92877	1.4641	3.82138	6.61869	0.535848	0.896071	1.72607	0.85063	0.555977	1.64205	1.14848	0.780839	1.46271	2.98251	0.901479	0.928754	0.843862	2.33848	2.71954	1.84997	1.61872	5.8393	0.5685	1.73803	1.2805	0.9845	1.4167	2.08176	1.59296	1.52518	0.910855	0.863819	0.808928	LQ	3.08853	1.519	2.67967	1.19737	2.57636	1.20433	6.8964	2.4791	0.479882	0.556928	2.05446	0.547088
b0850	ybjC predicted inner membrane protein	0.682614	1.94647	2.13338	1.42878	2.53989	1.90185	0.952968	1.05559	0.914569	1.10174	0.376226	3.37274	0.514648	2.1886	1.58764	10.9239	1.24163	1.28755	1.41096	0.694689	2.44734	1.90072	0.719794	1.4757	1.18648	1.57572	0.966496	0.809813	2.25169	1.75183	1.49618	1.14539	0.770177	0.803226	0.601874	0.663217	1.85999	2.29469	3.21552	0.812813	1.55027	1.21713	12.9409	16.8237	0.436417	0.678596	1.46593	0.40268
b0851	nfsA NADPH nitroreductase	0.47016	1.07104	0.708587	1.23824	0.714828	0.874791	1.4089	0.786278	0.688855	0.568596	0.212515	0.456401	0.696413	0.474022	1.18601	0.464129	0.982264	0.352712	0.424395	0.616698	0.72301	0.796559	0.665087	0.448245	0.409504	0.472363	0.84482	0.450778	0.58965	0.424713	0.539866	1.12083	0.384269	0.62537	0.183345	0.22651	0.677305	0.377974	2.19245	0.773471	0.516962	1.25338	4.9258	10.8248	0.171409	0.403428	0.403264	0.318393
b0852	rimK ribosomal protein S6 modification protein	0.310673	0.373392	0.332524	0.383362	0.480537	0.627854	0.355207	0.384538	0.542907	0.553681	0.292554	1.12901	0.249819	0.522723	0.549545	0.485677	0.501889	0.370936	0.50203	0.528831	0.575116	0.821969	0.455284	0.21915	0.617	0.328119	0.938903	0.311431	1.0508	0.462033	0.59909	0.52001	0.504802	0.560305	0.226023	0.228782	0.716201	0.313923	0.236999	0.322018	0.223038	0.939833	0.405901	1.06165	0.195918	0.581323	0.392384	0.564394
b0853	ybjN predicted oxidoreductase	1.01599	2.02441	1.22151	1.6262	1.65706	0.321507	0.269393	0.707869	0.786543	0.553702	0.392061	0.418893	0.339583	0.423729	1.18239	0.436188	0.893675	0.313599	0.34199	0.768039	3.7698	3.93394	0.511422	2.57565	0.30379	0.23444	1.6193	3.6616	1.50916	1.75698	1.74849	1.15756	0.438197	0.447454	1.62817	1.84855	2.21497	2.59762	1.06282	1.15153	0.199216	0.868539	6.27401	1.11127	0.182829	0.485	1.54168	0.422354
b0854	potF putrescine ABC transporter	0.310778	0.863102	0.550877	1.05425	0.631725	0.204804	0.872223	0.382998	0.449001	0.740997	0.440499	0.295644	0.278731	0.214798	0.726613	1.06222	0.80811	0.570421	0.607797	0.955901	0.548757	0.666816	0.219247	0.977256	0.0904841	0.212183	0.59489	1.03198	0.551346	0.517817	0.496756	0.6027	0.411183	0.688625	0.269409	0.257051	0.616125	0.153919	0.177942	0.98634	0.0870068	0.443478	0.381327	1.21162	0.0817147	0.16086	0.375693	0.302057
b0855	potG putrescine ABC transporter	0.587639	0.780756	0.405325	0.599691	0.289512	0.744301	0.639702	0.552553	0.412064	1.01219	0.804744	0.305646	0.202508	0.451936	0.780103	0.392872	0.848725	1.00751	1.01861	0.483895	0.260756	0.246977	0.316249	0.657866	0.749153	0.337256	0.897792	0.369568	0.649088	0.778957	0.954137	0.440663	1.09889	0.393052	0.17774	0.138126	0.322449	1.06271	0.14506	0.5453	0.32169	0.684731	0.160691	0.922066	0.146209	0.35271	0.331475	1.09424
b0856	potH putrescine ABC transporter	1.30003	1.95151	1.60939	1.46875	1.87879	4.85872	1.88921	1.20311	1.12471	0.730781	0.440872	0.777771	0.242045	0.510102	1.25412	2.56547	1.20596	1.53347	1.22123	2.24166	1.69552	1.654	0.877579	0.240254	0.490122	0.396265	1.28649	1.68137	1.77532	1.29629	1.18924	1.01448	0.259017	1.59402	0.267659	0.200221	2.25242	3.71093	0.566821	1.99291	1.37942	0.662621	1.83513	1.90963	0.153414	1.31882	2.99328	2.21285
b0857	potI putrescine ABC transporter	1.24014	0.632987	1.1368	0.528631	0.401517	1.54145	0.357302	0.381526	0.376127	0.252245	1.36724	0.432472	0.10888	0.907175	0.918661	0.278949	0.628719	0.58612	0.583357	0.279898	0.15662	0.184309	0.300317	0.480918	0.166355	0.100953	0.63038	0.569677	2.07937	0.630496	0.900521	0.187898	0.237945	1.60405	0.131733	0.129167	0.732201	1.62652	0.310602	0.648431	0.147551	0.291273	0.112434	0.505652	0.215641	0.375611	0.389262	0.332382
b0858	ybjO predicted inner membrane protein	1.72937	1.40899	2.78426	1.90077	4.18278	0.316501	1.2522	0.656229	1.67339	1.34915	1.46984	1.46981	0.651953	0.946005	0.861753	1.64692	0.804467	1.50858	1.47553	1.42877	2.71159	3.07497	3.03107	0.240779	1.14519	0.42987	1.60964	1.27493	2.64425	0.80949	0.981212	0.602144	0.860941	2.1713	1.34892	1.07291	1.61808	2.45207	0.984592	0.915478	2.49905	1.143	0.549491	0.727103	3.16302	3.83431	0.501978	0.360713
b0859	rumB 23S ribosomal RNA 5-methyluridine methyltransferase	0.355613	0.556409	0.542533	0.499	0.185837	0.226386	1.13005	0.620303	0.875895	1.02854	1.32215	1.22236	0.505844	0.845197	0.859143	0.313577	0.448025	0.901044	0.873139	0.568788	0.348149	0.509524	0.349447	0.146565	0.560038	0.262618	0.893645	0.664367	0.76901	0.585726	0.662698	0.482588	0.792958	0.551187	0.209646	0.196842	0.402278	0.274297	0.787906	0.333946	0.595926	0.418732	0.144542	0.521431	0.174796	0.89128	0.40999	0.774302
b0860	artJ arginine ABC transporter	2.34396	1.0219	1.14625	0.345109	0.46814	0.359869	0.42025	0.387884	0.648978	0.982648	0.282105	LQ	0.765587	0.733111	0.506355	0.33217	0.762504	0.48388	0.553317	0.341867	0.486591	0.552542	0.384899	0.247313	0.278294	2.23635	1.19246	2.34527	0.863882	0.547015	0.513749	1.27099	5.16361	0.414988	0.149054	0.197231	0.273713	0.442501	0.583161	3.38173	0.219532	0.711897	0.251298	0.323291	3.39898	0.453226	1.35494	1.42068
b0861	artM arginine ABC transporter	1.01526	1.19855	1.08412	1.32574	0.306767	0.680891	1.11797	0.457845	0.64798	0.972715	0.208326	0.300753	0.363995	1.26739	1.04189	0.511792	1.39884	1.24629	1.04708	1.2456	0.371347	0.393496	2.17398	0.382271	1.67941	0.885408	1.18533	0.55822	1.4278	0.923988	0.749542	0.820481	0.962707	0.923479	0.113715	0.177672	0.662531	1.1282	0.598774	0.956742	0.224158	1.11609	0.181025	1.09963	0.137876	4.0435	0.656906	0.485505
b0862	artQ arginine ABC transporter	1.07338	1.13071	1.67693	1.5354	0.141569	1.14581	0.197398	1.32905	0.900764	0.436424	0.162753	0.280245	0.170233	0.405671	0.516496	3.2876	1.16503	1.25139	1.36007	0.611407	0.206458	0.233553	0.39576	0.2168	0.484359	0.199609	0.72438	0.492237	1.39765	0.58188	0.621165	0.417423	3.121	0.382049	0.165645	0.195324	0.681259	0.46475	1.22086	0.584656	0.13157	1.3091	0.251793	2.03082	0.145704	0.498783	0.649212	0.319934
b0863	artI arginine ABC transporter	2.01907	1.15798	1.46971	0.414734	0.157228	0.829685	0.222504	1.31862	1.14797	1.11144	0.266539	0.857708	0.623979	0.474247	0.849219	1.79239	0.702625	0.528977	0.485473	0.970542	0.632639	0.593589	0.266892	3.60018	0.150094	1.14447	2.53762	2.25048	1.03897	1.40409	1.30969	0.995771	3.72408	0.454539	0.0999393	0.137595	0.814418	0.270482	0.924079	1.88	0.299058	1.37181	2.02878	0.422196	0.122241	2.78768	0.183014	0.196601
b0864	artP arginine ABC transporter	0.393756	0.663348	0.722216	0.30851	0.203076	0.530337	0.629935	0.280516	0.302999	0.786384	0.125963	0.393443	0.255158	0.302664	0.624608	0.889272	0.517076	0.466165	0.402738	0.418982	0.225736	0.276048	0.325468	0.175329	0.538672	0.372404	0.873442	0.67829	0.336577	0.459534	0.49703	0.716945	0.39744	0.605449	0.12749	0.145622	0.596991	0.220184	0.562466	0.851549	0.604564	0.864554	0.528914	1.08175	0.132915	1.1234	0.466679	0.609517
b0865	ybjP predicted lipoprotein	0.225202	1.22195	0.349149	0.490987	0.227544	0.651318	0.577938	0.295301	0.66854	0.717227	0.206635	0.289685	0.734725	0.367874	0.512503	0.544277	0.619547	1.06452	0.724592	0.363769	0.766374	0.80485	1.30241	0.119528	0.461293	0.243359	1.40638	0.546847	0.716494	0.424189	0.440702	0.295905	0.361853	0.938876	0.307746	0.238787	0.356392	0.29805	0.290505	0.634596	1.11338	1.16308	0.166529	0.558579	0.140277	0.757152	0.494297	0.534495
b0866	ybjQ conserved protein	0.729941	1.20235	0.915325	0.588355	0.872424	0.498647	0.712099	0.600556	0.806503	0.7445	0.442094	0.553827	0.498913	1.32759	0.762444	1.62163	0.555407	0.443057	0.636352	0.63482	0.449885	0.539323	1.16988	0.315273	0.755314	0.431734	0.803405	0.659425	0.699524	0.677085	0.76695	0.502629	0.832894	1.17814	0.420733	0.408331	0.550008	0.496024	0.548505	1.16888	2.92188	1.03253	0.472251	0.67706	0.344214	0.695684	0.704262	0.52725
b0867	amiD anhydro-N-acetylmuramoyl-L-alanine amidase	0.626628	0.618444	0.538036	0.386935	0.406917	0.296371	0.686415	0.802299	0.436123	0.483437	0.108308	0.425974	0.238212	1.26174	0.501832	0.568733	0.301765	0.541601	0.565333	0.169765	0.372965	0.391338	0.52529	0.188388	0.258311	0.722813	0.650886	1.09925	0.728592	0.348482	0.337958	0.44149	0.479872	1.09454	0.235409	0.219385	0.271674	1.18085	0.383428	0.609993	1.57057	0.750309	0.238171	0.628968	0.262103	0.646717	0.333854	0.841754
b0868	ybjS predicted NAD(P)H-binding oxidoreductase with NAD(P)-binding Rossmann-fold domain	0.310962	1.46928	0.788821	0.777915	4.23298	0.157616	0.3533	0.615086	0.956493	0.422838	0.135346	1.1217	0.185053	1.14573	1.15413	0.601505	1.03817	1.20991	1.15159	0.601348	0.394485	0.55778	0.0934792	0.0548712	0.603021	0.858883	0.713945	1.78422	0.509445	0.183618	0.240681	0.852183	3.13971	0.573455	0.0360222	0.0553641	1.67532	2.46387	1.31376	0.897365	0.0802432	0.485417	1.48464	1.41902	0.630092	0.946978	0.50383	0.625171
b0869	ybjT conserved protein with NAD(P)-binding Rossmann-fold domain	0.495963	0.602852	0.694291	0.896045	0.23269	0.481972	0.281845	0.434824	0.552882	0.425075	0.0966473	0.690456	0.16114	0.869433	0.628773	0.467243	0.832549	1.08894	1.18942	0.731611	0.447707	0.433235	0.988916	0.0992626	0.227405	0.270249	0.752333	1.1276	0.650782	0.684452	0.599789	0.360739	0.617371	1.07484	0.226587	0.100047	0.288741	0.627944	0.580615	0.40172	0.107768	0.80961	0.175937	0.910887	0.140282	0.597533	0.50537	0.403404
b0870	ltaE LtaA	1.29576	1.24032	0.697786	0.742868	0.58217	0.480866	0.763223	0.526636	0.764333	0.590468	0.508758	0.393673	0.396405	0.292838	1.34775	2.09219	1.10947	0.826851	0.83017	0.916854	0.822057	0.798958	0.749373	0.28352	0.661845	0.806429	1.15826	0.824471	0.720586	1.28808	1.46933	0.572316	2.5254	1.44245	0.544105	0.63983	0.946662	1.30706	0.994442	1.03503	0.0961742	1.23003	1.16837	0.698409	1.48846	0.28649	0.741408	1.15212
b0871	poxB pyruvate oxidase monomer	0.365465	1.27797	0.762758	1.24353	0.333154	0.391133	0.486178	1.13627	0.8063	0.670477	0.484961	LQ	0.379735	1.0224	1.05319	1.35704	0.961008	0.828555	0.944016	0.884502	0.856197	0.920116	0.277531	0.169601	0.729788	0.956633	0.921497	1.48701	0.926033	1.06792	1.01514	0.539276	1.17628	0.513827	1.25321	1.43623	1.05762	0.955404	1.24898	0.495762	0.121129	0.379893	1.08502	0.669996	0.489863	0.386725	0.287605	0.488144
b0873	hcp hybrid-cluster protein	0.836804	1.2877	0.907339	0.642364	0.607826	0.940658	1.10195	0.525111	0.811495	0.784426	0.131304	0.317695	0.344114	0.763032	0.750522	1.53542	0.943818	0.935597	1.06519	0.495657	1.3476	1.51445	0.96678	0.488821	0.87103	0.698609	1.04319	0.446212	1.10994	0.690111	0.810187	0.626492	1.34913	1.42305	0.373467	0.5282	0.548531	0.730085	0.685969	0.87344	0.138505	0.648161	1.6573	0.939554	1.45327	1.31835	0.353393	0.798185
b0874	ybjE predicted transporter	3.26998	2.86982	2.8784	3.00832	3.24931	2.78886	3.23786	1.69469	1.81816	1.51069	0.291066	4.29585	3.25191	1.4213	2.51672	2.8277	2.33114	1.69338	1.51917	2.35206	6.01531	4.91817	2.21475	3.74677	8.42324	4.37315	2.33714	3.10293	3.0153	3.00189	2.37948	1.75765	1.37794	1.44152	0.917079	0.697461	2.64527	3.79597	2.53141	2.45925	3.47677	1.53006	0.910014	3.37693	0.126866	1.96986	3.31397	0.789233
b0875	aqpZ AqpZ - water MIP channel	0.979313	1.09471	1.11137	1.19097	1.84578	0.569263	0.636375	1.30162	0.41076	1.63613	1.10039	0.326624	0.505288	0.541438	1.42874	1.85323	0.866298	0.951413	0.855636	2.40823	1.64473	1.4434	0.466781	1.63978	0.389636	0.670267	1.6803	1.4522	0.599569	1.14311	1.21763	0.958626	0.457081	0.933276	2.07816	2.22042	0.486524	0.555661	0.798199	2.78551	0.553955	1.96865	0.343226	1.48159	0.65148	1.78737	0.555958	1.08611
b0876	ybjD conserved protein with a nucleotide triphosphate hydrolase domain	0.480371	0.831433	0.75315	1.19027	0.931147	0.553071	1.20704	0.618813	0.612617	0.731362	0.92153	1.015	0.462135	0.492041	0.903393	0.687872	0.946649	1.03661	1.0764	0.847231	0.798286	0.858606	0.656432	0.408675	0.411705	0.925686	0.887547	0.677601	0.654596	0.857681	0.984694	0.67732	0.439072	0.553964	0.236447	0.328048	0.681227	0.885685	0.318873	1.01264	0.212784	0.669953	0.506224	0.798282	0.23597	0.496606	0.800098	0.278806
b0877	ybjX conserved protein	1.12374	1.0042	0.815893	0.605336	0.249603	0.686875	1.02708	0.340561	0.966104	0.807454	0.472488	0.68405	0.916175	1.11909	0.606173	0.726256	0.832952	0.943327	0.858962	0.462	1.48055	1.28099	0.418441	0.175424	0.844929	0.583039	0.98636	0.731742	0.924692	1.20347	1.12912	0.572914	0.449194	1.38291	2.78738	2.67047	1.01382	1.15841	0.669291	0.990713	1.06096	1.88183	0.202576	1.36063	0.162279	1.20867	0.370693	0.280985
b0878	macA MacAB-TolC Macrolide Efflux Transport System	0.324227	0.702059	0.5563	0.506267	0.130446	0.192494	1.62704	0.594475	0.616656	0.644444	0.261365	0.605608	0.781124	0.308467	0.471513	0.259566	1.2743	0.462573	0.395633	0.667639	0.307555	0.30117	0.435446	0.116671	0.152203	0.299859	1.40974	0.161733	0.331559	0.605617	0.610107	0.795571	0.279167	0.339243	0.174287	0.191708	0.26507	1.33347	0.273946	0.468926	1.41618	0.599499	0.172371	0.552701	0.10776	0.407339	0.165931	0.989284
b0879	macB MacAB-TolC Macrolide Efflux Transport System	0.870396	0.774497	0.71433	0.571405	1.23304	0.836718	0.859246	0.573887	0.905995	0.562938	0.772769	0.590345	0.335572	0.730976	0.834927	1.51262	0.720886	0.965748	1.13619	0.778474	0.530617	0.341709	0.346441	0.188788	0.779678	0.58259	0.799722	0.662721	0.633797	0.600474	0.506849	0.401043	0.427778	0.667174	LQ	0.175688	0.708045	0.586795	0.666753	0.780761	0.125411	0.394369	0.504829	0.738331	0.168913	0.4059	1.14527	0.414083
b0880	cspD DNA replication inhibitor	0.679481	0.949089	0.745368	1.03218	0.460635	0.609521	0.472117	0.882629	1.04598	0.951666	0.44829	0.608535	0.791749	1.58701	0.78147	1.02915	0.64799	0.817378	0.984505	0.627561	1.3987	LQ	0.953385	0.509549	0.421724	0.578566	1.15152	0.806171	1.1082	1.10748	1.04246	0.654918	0.963095	0.975294	2.09205	LQ	0.521291	0.809807	0.62511	1.11566	0.555035	1.20503	0.628352	1.00999	0.492524	0.883763	1.85363	2.27579
b0881	clpS specificity factor for ClpA-ClpP chaperone-protease complex	1.92963	1.44162	1.64072	2.73654	0.713846	3.36592	1.24952	1.22343	1.29705	0.989193	0.349656	0.976859	0.792273	0.707303	1.90884	4.99569	0.525428	0.774063	0.784484	1.11654	0.506858	0.632126	1.04319	0.431394	0.328267	2.2227	1.24138	1.80202	2.42815	1.12563	1.23821	0.504229	2.46462	0.997897	0.428506	0.537569	3.13009	1.19137	1.96415	0.725399	3.12205	2.60777	4.18516	0.895056	0.444764	0.531298	1.40628	0.425232
b0884	infA protein chain initiation factor IF-1	0.604909	0.77019	0.752009	0.722955	0.449678	0.607843	0.353653	0.667534	0.432721	0.922111	0.435434	LQ	0.451488	0.932959	0.401361	0.968398	0.353484	0.636957	0.777951	0.463005	0.635391	1.10772	0.84196	0.504818	0.31309	0.560578	0.916496	0.620125	0.833701	0.701944	0.779512	0.431113	0.953659	1.02212	0.405291	LQ	0.46144	0.63993	0.644164	0.653359	0.476657	1.19476	0.515445	0.998691	0.497631	0.405301	0.549904	0.845576
b0885	aat leucyl, phenylalanyl-tRNA-protein transferase	0.340667	1.15947	1.10408	1.13384	0.412393	1.51689	1.33717	1.12196	0.680077	0.857829	2.39707	0.64305	0.220291	0.787368	0.715158	1.61334	0.866501	0.723166	0.624064	0.972046	2.39188	2.01588	1.03635	0.208732	0.50859	1.32984	1.00083	0.960029	1.40946	0.975208	0.97495	0.3564	0.990654	0.790104	0.124681	0.137155	0.75849	1.1109	1.32289	0.582619	0.139135	1.1287	0.169328	0.785613	0.18722	1.36243	0.20447	1.21842
b0886	cydC cydDC glutathione ABC transporter	0.148617	0.305274	0.190115	0.242205	0.104776	0.153988	0.131586	0.212736	0.144081	0.246913	0.220553	0.264406	0.087037	0.259181	0.171566	0.339462	0.268512	0.336452	0.258212	0.186432	0.291755	0.337116	0.303555	0.142293	0.0928041	0.125458	0.388474	0.106798	0.433787	0.376435	0.37084	0.0893639	0.306268	0.332286	0.144338	0.0847152	0.183677	0.158103	0.0638816	0.26141	0.110155	0.399926	0.0945132	0.421997	0.114904	0.121137	0.221429	0.180842
b0888	trxB thioredoxin reductase monomer	0.260756	0.416853	0.301337	1.08627	0.157033	0.304258	0.70091	0.176011	0.50884	0.548795	0.18474	0.371663	0.41056	0.352863	1.76203	1.38139	1.15635	0.952163	0.864115	12.334	6.68061	6.97751	1.70971	1.39256	1.07962	1.69314	0.534783	1.19017	0.555286	0.813998	0.814778	1.62427	1.55585	2.28957	2.86753	3.39711	0.27767	0.214072	0.437561	0.312059	0.132837	0.413487	0.0713968	0.394619	4.24221	0.471477	1.00239	0.347681
b0889	lrp Lrp transcriptional dual regulator	0.847727	0.5021	0.862947	0.55128	0.536531	0.343729	0.911475	1.27174	0.952369	0.905099	0.891012	1.25215	1.14363	0.856123	1.59659	0.578958	1.1369	0.833961	0.727428	2.41558	3.48169	2.8363	1.41695	0.93249	0.892791	1.93464	0.572531	0.803783	0.426031	0.731459	0.644397	1.05197	2.21721	1.22258	0.728198	0.754793	0.948384	0.612178	0.65453	0.263761	1.41836	8.43678	0.243596	0.863519	0.315897	0.648528	0.925718	3.44275
b0891	lolA periplasmic chaperone, effects translocation of lipoproteins from inner membrane to outer	0.18584	0.304591	0.192685	0.852187	2.0468	0.146909	0.317983	0.392295	0.302958	0.271138	0.446891	0.226675	0.17463	0.33704	0.642961	0.269325	0.264603	0.273712	0.339876	0.44872	0.196745	0.226077	0.262592	0.123917	0.222734	0.220305	0.378197	0.159045	0.372625	0.360074	0.36032	0.347249	0.227158	0.496827	0.344241	0.426401	0.661678	0.183909	0.320943	0.247315	0.137943	0.307453	0.190724	0.325754	0.17697	0.339192	0.193431	0.308009
b0892	rarA recombination factor	0.514542	0.601609	0.719973	0.842609	0.923378	0.458565	0.976562	0.391891	0.707118	0.549213	0.693789	0.621167	0.532876	0.686563	0.731766	0.27705	0.6751	0.587393	0.543603	0.634145	0.253539	0.237656	1.31797	0.21766	0.549735	0.217598	0.965367	0.222874	0.824049	0.496744	0.542438	0.661621	0.657714	0.816406	0.269345	0.304269	0.296692	0.286658	0.459334	0.788674	0.383136	0.48971	0.185213	0.681426	0.944854	1.3134	0.231554	0.395653
b0893	serS seryl-tRNA synthetase	0.253277	0.214203	0.376734	0.380361	0.122895	0.165117	0.120111	0.191505	0.230572	0.298999	0.116182	0.201711	0.0957718	0.213162	0.130492	0.260609	0.155762	0.247353	0.30327	0.141961	0.165718	0.171625	0.499974	0.109156	0.0758396	0.101449	0.339284	0.129582	0.26513	0.265707	0.258966	0.0718692	0.258561	0.277896	0.291147	0.307083	0.104162	0.249767	0.133032	0.145404	0.102936	0.283822	0.112447	0.256722	0.132395	0.12902	0.374054	0.232025
b0894	dmsA dimethyl sulfoxide reductase, chain A	0.665859	0.885115	0.570942	0.86986	0.527279	0.933616	0.71853	0.298558	0.559342	0.726475	1.10187	LQ	0.186663	0.443569	0.548003	0.403256	0.517376	0.655135	0.766598	0.700007	0.580157	0.592745	0.80491	0.437547	0.622559	0.310495	0.867481	0.581279	0.572081	0.424502	0.472005	0.407401	0.917678	0.947155	0.675102	0.86408	0.579095	0.427613	0.490282	0.795208	0.546295	0.785012	0.388395	1.07768	0.118798	0.614175	0.281243	0.265101
b0895	dmsB dimethyl sulfoxide reductase, chain B	0.332256	0.787186	0.705808	0.572173	0.519259	0.36805	0.785066	1.0169	0.719498	1.02766	0.355712	0.30575	0.512258	0.595031	1.02979	0.55772	1.14106	1.22084	1.07682	0.56776	1.61252	1.49299	0.481728	0.167338	0.314133	0.233386	0.658936	0.908607	0.863067	1.17437	1.18417	0.720458	0.546551	0.63357	0.759171	0.74637	0.391169	0.754475	0.662666	0.512542	0.695137	0.999988	0.318152	1.06411	0.172906	0.570145	0.310882	1.71569
b0896	dmsC dimethyl sulfoxide reductase, chain C	0.297314	0.908855	0.67579	0.69991	0.243205	0.739655	0.448915	0.403115	0.4038	1.28548	0.180912	0.617628	0.256681	0.418936	0.783342	0.304105	0.838855	1.25901	1.41994	0.523877	0.217102	0.241289	0.763642	0.106244	3.01897	0.254494	0.890281	0.432485	0.458108	1.18658	1.16312	1.15308	0.364801	1.38955	0.776182	0.54476	0.603252	1.5032	0.671296	0.992766	0.358858	1.45869	0.408026	0.80699	0.0908565	0.796999	0.681262	0.703232
b0897	ycaC predicted hydrolase monomer	1.03219	1.01335	1.89715	1.21152	0.552331	0.752278	0.979613	0.638773	0.638053	0.889936	0.310064	0.573437	0.442785	0.82517	0.805978	0.668204	1.42818	0.928156	1.02248	0.84505	0.384685	0.472154	1.26922	0.764414	1.89813	1.12954	1.18534	0.641894	0.847689	0.961295	1.08417	1.11275	0.800289	2.40611	1.02352	1.10462	0.604855	0.65754	0.983016	0.818639	0.789733	1.16037	1.89933	0.868395	0.32655	2.46029	0.882486	1.46141
b0898	ycaD YcaD MFS transporter	1.55062	1.3003	1.51985	1.15033	0.282148	0.773837	1.40577	0.461263	0.738919	0.527286	0.308999	0.494635	0.203757	0.518476	0.940134	1.20879	0.880236	0.862378	0.910267	0.600299	0.562728	0.626916	0.556599	0.316949	1.51289	0.768866	1.26213	1.52089	1.2938	1.2749	1.18296	1.08075	0.747708	0.613216	1.6488	1.92931	2.33561	2.58996	2.41325	1.58443	0.235311	1.30547	0.326809	1.1527	0.602035	1.51336	0.446504	0.706921
b0899	ycaM YcaM predicted APC amino acid transporter	4.18551	3.56804	3.40317	3.20201	3.9671	6.75825	3.10791	3.77591	2.38359	1.74642	2.9185	3.81185	0.665587	0.465428	2.93449	3.39706	2.08052	3.09083	4.02191	2.38939	2.17239	2.10684	2.79862	6.89553	5.05701	4.03547	2.36812	2.2822	3.35855	2.6113	2.96631	2.50226	3.65931	3.63228	1.41607	1.40522	4.0564	3.91168	3.49803	2.97443	1.62574	2.80794	2.58299	3.101	3.47144	1.57515	2.71542	1.61106
b0900	ycaN putative transcriptional regulator LYSR-type	9.94327	4.84201	5.70674	6.41706	9.77498	9.20289	2.95936	5.6311	3.24264	2.22829	3.1729	6.04088	0.910213	0.927945	5.38585	7.39793	4.15975	4.02551	4.18596	6.8644	6.92231	7.50927	5.0141	8.20764	3.28315	12.4577	4.30413	4.32981	4.4818	5.29859	5.23534	7.24705	2.89639	3.85012	15.8388	18.9154	9.2148	6.18764	6.50388	7.06115	9.9739	2.11382	9.90697	5.22356	6.76824	3.49522	6.20872	3.94232
b0901	ycaK YcaK	5.36456	3.9068	4.46872	3.628	10.0181	6.04162	4.22909	2.37509	2.89152	2.9592	1.42403	4.7768	2.55851	1.17856	3.31651	5.4027	5.12623	3.648	3.27374	5.42914	3.47252	2.50035	4.33595	4.32415	3.22405	5.4629	3.22589	3.65042	2.60048	4.20622	5.26966	3.67612	4.92901	4.47627	1.00759	1.29531	4.90484	3.52333	2.84714	3.49732	2.2503	3.86463	5.14711	2.39719	3.81553	3.99324	8.13234	1.70922
b0902	pflA pyruvate formate-lyase activating enzyme	0.820708	0.809812	0.781516	0.841245	1.63989	0.957211	0.320195	0.99065	0.729855	0.738246	0.216557	0.850665	0.367996	0.416859	0.830223	0.68825	0.729397	0.549394	0.58647	0.797594	1.3904	1.35317	1.49593	0.942405	0.927494	1.15342	0.672048	0.603461	0.479701	0.689427	0.869181	1.20381	0.776938	0.784895	0.234335	0.328795	0.680585	1.04852	0.657755	1.27386	0.20323	0.920824	0.471887	0.687807	0.291177	0.342316	0.523531	0.689701
b0903	pflB pyruvate formate-lyase (inactive)	0.866005	0.67982	1.26969	0.971551	0.706232	0.872563	0.206717	LQ	0.524119	0.447915	1.01678	LQ	0.310682	0.328538	0.962986	0.619624	0.403246	0.878628	0.864015	0.616125	0.428018	0.451168	0.766238	0.94564	0.426532	0.998425	1.15597	0.838869	0.727825	1.00808	0.977129	0.792607	0.850855	0.81985	0.553818	0.652634	0.780909	0.865124	0.897468	1.17903	0.262886	0.511293	1.38128	1.89227	0.334871	0.627034	0.48341	0.709141
b0904	focA FocA formate FNT transporter	2.02006	2.63101	3.26309	2.23981	1.76813	1.95364	0.500249	1.09134	1.45404	1.53552	0.623409	0.94661	0.574323	0.568528	1.73629	0.837823	1.39605	2.73574	2.4269	2.02863	2.27706	1.85639	2.62708	1.77075	1.02641	0.874435	1.39252	3.37088	1.07901	2.44219	2.53017	1.56367	3.51186	2.10924	3.15083	2.34074	1.78249	1.70698	0.871025	2.74798	3.25959	0.691185	1.8356	1.34018	1.90545	2.15872	4.15055	1.2575
b0905	ycaO conserved hypothetical protein	1.63068	1.43326	2.0893	1.7699	0.868614	1.73145	1.58477	1.47865	1.35279	1.66912	1.14994	1.17065	0.763816	0.411852	1.29737	1.21567	0.829984	1.32379	1.24053	1.74012	1.77373	1.66344	0.835251	0.754842	0.951262	1.32935	1.64601	2.40882	2.44731	1.38104	1.51006	1.83929	0.651286	1.09184	0.51453	0.587041	1.10231	1.66022	0.774201	2.52792	1.54702	1.74689	2.25705	1.20584	1.26563	1.43361	1.70196	1.53232
b0906	ycaP conserved hypothetical protein	1.22134	0.868977	1.8102	1.12552	0.210536	1.53407	1.98289	1.86837	0.608465	1.40264	0.597137	0.86097	1.25868	0.782773	0.831208	0.45052	0.931574	1.16649	1.04815	1.82799	0.329686	0.361949	0.666482	1.62859	0.641423	0.433406	1.42978	1.5076	1.2879	0.986569	0.856649	0.792806	0.620347	1.64256	0.544047	0.575518	0.944136	0.38368	0.66976	0.757704	0.356552	1.06957	1.13962	0.712096	2.86894	1.72045	0.754024	1.01127
b0907	serC phosphohydroxythreonine aminotransferase / 3-phosphoserine aminotransferase	0.250413	0.315262	0.308005	0.305634	0.234899	0.233163	0.264716	0.286073	0.216481	0.368441	1.06237	0.852646	0.331422	0.361531	0.271704	0.436163	0.170738	0.308508	0.318159	0.185646	0.22923	0.267319	0.456596	0.245999	0.134408	0.30738	0.361265	0.221434	0.407539	0.274103	0.347206	0.30823	0.485441	0.473465	0.157816	0.194888	0.207128	0.233438	0.129912	0.2955	0.201912	0.632312	0.212028	0.325753	0.265029	0.224091	0.214417	0.63087
b0908	aroA 3-phosphoshikimate-1-carboxyvinyltransferase	0.26191	0.315018	0.284825	0.275083	0.208495	0.221936	0.341896	0.256399	0.454384	0.484616	0.218275	0.597167	0.509836	0.572925	0.23363	0.673448	0.247858	0.329557	0.322063	0.223264	1.04108	0.979864	0.723604	1.71161	1.63133	0.80482	0.569451	0.561089	0.307377	0.244507	0.290051	0.330717	0.414712	0.401652	0.144662	0.139541	0.17863	0.271675	0.112045	0.242386	0.204647	0.571812	0.238563	0.357031	0.231934	0.350086	0.272632	1.91753
b0909	ycaL putative heat shock protein	1.05886	0.931476	0.822985	0.567296	1.24004	0.854488	0.757569	0.376759	0.728831	0.656736	0.296443	1.24	0.43393	0.863231	1.08508	2.6589	0.608312	1.00431	0.833794	0.822895	0.749032	0.744623	0.671228	6.46333	0.383547	0.404782	1.07163	1.2827	1.28806	0.758649	0.690604	0.866641	1.72097	0.574092	0.220587	0.178794	1.33285	0.845958	0.629035	0.660296	1.94097	0.772689	0.711918	0.578296	2.03221	0.466839	2.51082	0.364464
b0910	cmk cytidylate kinase	0.178943	0.20245	0.20398	0.177508	0.149822	0.229275	0.186935	0.140409	0.203419	0.224082	0.213575	0.295945	0.333648	0.242542	0.238903	0.348147	0.211109	0.381929	0.35514	0.191227	0.154387	0.180978	0.212116	0.207686	0.147176	0.119812	0.230539	0.253175	0.282174	0.181236	0.227282	0.241455	0.310655	0.233123	0.0856313	0.102482	0.215691	0.630918	0.14426	0.216081	0.148884	0.296282	0.131925	0.204279	0.187647	0.244136	0.277613	0.199662
b0911	rpsA 30S ribosomal subunit protein S1	0.2235	0.224222	0.27073	0.290393	0.185589	0.248052	0.0962616	0.247059	0.1268	0.322481	0.128526	0.307226	0.0995969	0.326731	0.148929	0.378673	0.123712	0.355762	0.318398	0.0950709	0.234322	0.24148	0.333398	0.181631	0.0879983	0.207213	0.350355	0.199762	0.332387	0.320009	0.290293	0.161283	0.347129	0.394772	0.165143	0.116716	0.274799	0.288974	0.0783592	0.250072	0.218058	0.410698	0.243302	0.357453	0.209223	0.112889	0.252063	0.157845
b0912	ihfB IHF transcriptional dual regulator	0.530996	0.605003	0.545242	0.620444	0.469127	0.643855	0.434916	0.60053	0.411513	0.713744	0.490339	0.824705	0.403706	0.782414	0.605482	0.928308	0.555417	0.623847	0.73086	0.427988	0.494746	0.644808	0.839813	0.383238	0.43284	0.480835	0.669338	0.529724	0.722334	0.487393	0.580232	0.416634	0.767939	0.81691	0.24782	0.324838	0.591751	0.754549	0.391568	0.618167	1.45951	0.98509	0.48845	0.906852	0.384506	0.477445	0.442057	0.467981
b0913	ycaI putative recombination protein with a metallo-hydrolase domain	1.6307	1.52567	1.39354	0.845457	0.980421	2.27487	1.54591	0.763272	LQ	1.15943	0.223902	1.15355	LQ	0.506891	1.18727	1.00792	1.12509	1.26355	1.10582	1.27025	1.00186	1.03825	2.14033	1.15274	1.60067	1.33949	1.36617	1.19889	1.36322	1.1067	1.11169	1.17075	0.445272	1.62451	0.206615	0.20168	1.23359	1.19926	LQ	1.46804	0.487968	0.90512	1.96404	1.37953	2.54158	1.24636	0.512075	1.17662
b0914	msbA ATP-binding transport protein	0.155084	0.176388	0.219073	0.191936	0.101244	0.203531	0.121139	0.2217	0.121399	0.202624	0.17086	0.435503	0.123229	0.182447	0.1814	0.257536	0.122292	0.230911	0.206562	0.139774	0.170992	0.162418	0.181073	0.0925534	0.0859789	0.103604	0.236366	0.122042	0.231381	0.381173	0.420781	0.121129	0.214494	0.243757	0.0942686	0.0752909	0.118974	0.12624	0.114003	0.146803	0.0894054	0.273632	0.1045	0.229295	1.32607	0.119753	0.230987	0.141127
b0915	lpxK tetraacyldisaccharide 4'-kinase	0.17741	0.327813	0.212321	0.283009	0.137325	0.156592	0.338515	0.146374	0.13845	0.215652	1.48642	0.170034	0.132359	0.289888	0.31865	0.366877	0.255471	0.348502	0.374029	0.283685	0.178909	0.214177	0.273933	0.128598	0.11175	0.330442	0.304287	0.151639	0.394622	0.379852	0.496116	0.194348	0.368847	0.343654	0.10519	0.11652	0.145052	0.181986	0.0791848	0.191851	0.103454	0.580668	0.184386	0.332201	0.19139	0.293521	0.218422	0.215116
b0916	ycaQ conserved protein	0.723536	0.754207	0.93724	0.407714	0.154536	0.915251	0.901466	0.287598	0.601125	0.80594	0.283447	0.735571	0.734614	0.91634	0.502949	2.64727	1.24793	0.868855	0.812769	0.667871	1.25255	1.03597	0.399302	0.62014	0.239201	0.501824	0.960831	1.4234	0.461888	0.732124	0.762784	1.95134	1.97323	2.01986	0.315292	0.27931	0.565588	0.434212	1.04262	0.947718	0.280777	0.827495	0.391168	1.02356	0.172301	0.221005	0.938348	1.78866
b0917	ycaR conserved protein	0.699839	0.726601	1.33771	0.815695	0.551121	0.861005	0.62197	LQ	0.660007	LQ	0.672829	LQ	0.850187	0.889571	0.652202	1.2547	0.634489	0.754376	LQ	0.68348	0.6864	LQ	0.972797	0.58078	0.602377	0.738925	1.01917	0.703336	0.971654	1.11661	1.04508	0.667125	1.21489	1.0979	0.50942	0.541196	0.634928	0.700216	0.591334	0.755776	0.533619	1.28888	0.616118	1.19238	0.549334	0.626004	1.15115	0.85621
b0918	kdsB 3-deoxy-D-manno-octulosonate cytidylyltransferase	0.643892	0.393493	0.552366	0.719127	0.798521	0.745903	0.339357	0.819936	0.588562	0.430159	0.409645	0.927665	0.560374	0.588902	0.380288	0.527931	0.461832	0.507686	0.455201	0.453076	0.333982	0.30719	0.473147	0.274862	0.311294	0.358759	0.600019	0.371113	0.594865	0.638672	0.626238	0.418189	0.530578	0.874657	0.246601	0.262159	0.778012	0.435057	0.922321	0.745776	0.288824	0.644068	0.289557	0.5808	0.315361	0.387754	0.510183	0.415889
b0919	ycbJ conserved hypothetical protein	0.408198	1.16528	0.656504	0.965678	0.525795	0.459906	1.06106	0.531113	0.770923	0.846084	1.15904	0.862962	0.893557	0.943015	0.641834	0.71674	1.11815	1.76416	1.51661	0.921715	0.761652	0.791228	0.931159	0.647785	1.0642	0.773729	1.23595	0.526546	1.05857	1.18224	1.22636	0.718619	0.760853	1.56161	0.773024	0.982371	0.671403	1.45767	0.570428	0.910307	0.831705	1.04474	0.382979	1.34497	0.336692	1.49652	1.04468	0.831763
b0920	ycbC conserved inner membrane protein	0.392824	0.544915	0.459985	0.531899	0.20766	0.502225	0.918125	0.522603	LQ	0.532504	1.08639	0.404847	LQ	0.672278	0.24987	0.314773	1.09398	0.55814	0.662698	0.211101	0.234854	0.301566	2.28283	0.334223	0.459986	0.544354	0.751918	0.419435	0.619671	0.76822	0.814954	0.388548	0.562014	0.959813	0.191593	0.22626	LQ	1.02285	LQ	0.555183	0.513104	0.569792	1.87181	0.697608	0.179403	1.2761	0.235364	2.90383
b0921	smtA predicted S-adenosylmethionine-dependent methyltransferase	0.499851	0.740854	0.251676	0.876783	1.51902	0.322734	0.905911	0.272051	0.330201	0.403811	0.257888	0.286314	0.351983	0.397158	0.377264	0.338522	0.625977	0.503847	0.566829	0.279803	0.234706	0.307086	0.453826	0.303157	0.309807	0.301454	0.425825	1.64783	0.691937	0.410307	0.389439	0.310457	0.631949	0.38818	1.09882	1.35636	0.298916	0.529436	0.62363	0.423582	0.342344	0.814774	0.195711	0.358103	0.25157	0.393588	0.238343	0.262226
b0922	mukF Ca 2+-binding protein involved in chromosome partitioning	0.307582	0.428872	0.34294	0.303936	0.207314	0.24673	0.281257	0.295507	0.204102	0.353129	0.161389	0.32406	0.152781	0.455757	0.218628	0.486952	0.268534	0.420761	0.407421	0.149057	0.482482	0.407634	0.440043	0.180378	0.0978942	0.203456	0.451824	0.68269	0.472265	0.607503	0.473817	0.125164	0.53599	0.506401	0.279051	0.20098	0.198635	0.485835	0.106971	0.310066	0.188218	0.582846	0.1907	0.487012	0.198159	0.147127	0.347765	0.188021
b0923	mukE protein involved in chromosome partitioning	0.28139	0.459044	0.354507	0.32751	0.267886	0.26237	0.231146	0.403185	0.239827	0.383928	0.216842	0.415054	0.222118	0.507271	0.399732	0.510015	0.246516	0.349902	0.427207	0.246621	0.252944	0.364563	0.404205	0.270739	0.181824	0.284274	0.477365	0.307208	0.396087	0.28056	0.393133	0.27198	0.503687	0.521577	0.232171	0.302233	0.176437	0.290055	0.135377	0.281865	0.270746	0.698137	0.286218	0.452373	0.257884	0.286758	0.336776	0.238498
b0924	mukB cell division protein involved in chromosome partitioning	0.222298	0.260791	0.224791	0.323395	0.194635	0.255664	0.271765	0.281707	0.283455	0.330836	0.258725	0.32126	0.344162	0.310994	0.322895	0.396041	0.389856	0.389395	0.498929	0.357782	0.284564	0.33872	0.314568	0.200114	0.196503	0.220524	0.324277	0.452982	0.358259	0.233125	0.256036	0.293166	0.341745	0.391195	0.142283	0.170865	0.27414	0.219324	0.222227	0.250443	0.157861	0.391982	0.201317	0.236094	0.190334	0.268549	0.289532	0.241234
b0925	ycbB predicted carboxypeptidase/amidase	0.524113	1.14569	1.20482	1.67427	0.41617	1.43236	1.15443	1.50728	1.45547	1.69656	1.71669	1.2074	0.369073	0.589258	2.1722	0.972178	3.73687	2.7037	2.67064	5.83002	2.2996	2.54475	1.25503	1.50956	0.563135	0.549975	1.6012	1.83362	0.699966	0.634571	0.564616	0.803047	0.889677	1.38047	0.723052	0.962206	0.55339	0.369002	2.24149	1.11181	1.18448	1.55761	1.77627	0.904786	0.394841	2.58974	1.23566	0.632292
b0926	ycbK conserved protein	0.428205	0.716923	0.715109	0.892879	0.330437	0.458021	0.502235	1.06347	0.508607	0.788676	0.44705	0.952649	0.367885	0.616836	0.936348	0.716511	0.597799	0.438108	0.628743	0.563016	1.32748	1.2972	0.668659	0.399324	0.253802	0.290691	1.01947	1.59167	0.579879	0.375199	0.484783	0.839719	0.890943	1.51046	0.322812	0.470798	0.418648	0.432365	0.31273	0.577302	0.310055	0.854796	1.07318	0.663207	0.352247	0.471444	0.402946	0.667516
b0927	ycbL predicted metal-binding enzyme	1.10871	0.944545	1.9544	1.28283	0.231009	0.668164	1.59303	0.582503	0.421689	1.06643	0.346667	0.627712	0.584709	0.600867	0.826709	1.16986	0.753659	0.350597	0.473901	0.452799	0.502907	0.554173	0.521106	0.589104	0.22593	0.246155	0.70497	0.329848	0.998153	0.743117	0.784274	0.50939	0.923788	0.861251	0.491589	0.600537	0.757873	0.446691	1.00315	0.694026	0.513649	0.899901	0.451495	1.01071	0.200362	0.447602	0.490176	0.704873
b0928	aspC aspartate aminotransferase, PLP-dependent	0.521262	0.596957	0.786435	0.995365	0.39778	0.547996	0.166742	0.357817	0.291411	0.555414	0.137638	0.368289	0.350661	0.35554	1.42266	2.99478	0.766008	0.962541	0.879601	1.98985	1.98129	2.00122	2.14909	0.608557	2.94989	0.813614	0.708833	0.343559	1.21504	0.471084	0.485341	1.42442	2.58389	1.15914	1.13569	1.62314	0.616138	0.48378	0.607517	0.59286	0.220203	1.41997	0.331612	0.756106	1.17268	0.251034	1.0078	1.01209
b0929	ompF The Colicin A Import System	1.34652	0.796746	0.687259	1.99486	0.765261	0.407036	0.278579	0.896062	0.880403	0.503464	0.241076	0.18735	0.695815	0.349463	3.11272	3.54316	8.61565	7.78406	10.0226	11.391	14.5065	17.9766	7.04141	8.61188	5.93506	4.87043	1.08119	0.850232	2.1083	2.09184	2.30196	4.22289	1.7153	33.6228	30.4011	55.0192	2.07458	0.64731	0.552009	0.806674	0.159201	1.74075	5.54612	1.01585	6.28059	1.54627	4.33864	19.7315
b0930	asnS asparaginyl-tRNA synthetase	0.700192	0.218847	0.212187	0.296085	0.178393	0.185719	0.0824404	0.236936	0.192214	0.276724	0.225734	0.192947	0.20648	0.44268	0.184642	0.419429	0.237861	0.480399	0.474601	0.210165	0.400886	0.485534	0.324375	0.179864	0.12554	0.172682	0.393908	0.152618	0.379982	0.3631	0.313581	0.221938	0.393595	0.461257	2.29397	2.0727	0.30529	0.170395	0.0880926	0.229248	0.343298	0.468748	0.161119	0.412783	0.173886	0.261354	0.343764	0.188016
b0931	pncB nicotinate phosphoribosyltransferase	0.354326	0.701863	0.374219	0.381715	0.561582	0.496721	0.395621	0.285943	0.483973	0.45889	0.613523	0.147335	0.527303	0.225304	0.588243	0.199191	0.841526	0.196801	0.196979	0.508768	0.241001	0.256631	0.220823	0.600295	0.440671	0.350884	0.649402	0.429923	0.520058	0.330191	0.269694	0.649704	0.259047	0.221966	0.075283	0.0855728	0.389985	0.178231	0.142013	0.631264	0.248674	0.214513	0.883251	0.25305	0.0755711	1.16829	1.01325	0.444864
b0932	pepN aminopeptidase N	0.741241	0.774914	1.07355	0.796474	0.439594	0.59685	0.399593	0.311703	0.630403	0.678155	0.556916	0.586392	0.389336	0.481075	0.464632	0.982969	0.560033	0.551678	0.460525	0.230012	0.635129	0.647106	0.716196	0.281686	0.798212	0.562297	0.867395	0.592648	0.968227	0.657196	0.649315	0.515785	0.661287	0.764604	0.300703	0.293829	0.593915	0.801338	0.229338	0.728515	0.762854	0.69136	0.687434	0.725087	0.432324	0.934462	0.766807	0.671908
b0933	ssuB aliphatic sulfonate ABC transporter	0.400687	0.698173	0.533168	0.494107	0.385988	0.29845	0.939795	0.186093	0.654591	0.513299	0.866702	0.471162	0.293854	0.250247	0.388141	1.05814	0.512806	0.44797	0.396077	1.02592	1.10819	1.67621	1.23026	0.538294	0.202336	0.564922	1.05379	0.62714	0.814595	0.644885	0.507173	0.471229	0.379944	0.952694	0.635262	0.534659	0.525654	0.252141	0.869202	0.407926	0.518883	0.392636	0.116184	0.656281	0.178383	0.861907	0.205926	0.614846
b0934	ssuC aliphatic sulfonate ABC transporter	0.248174	0.682092	0.668038	0.352914	0.895107	0.344044	0.206018	0.273493	0.334392	0.485329	0.547126	0.497762	0.10365	0.248807	0.652597	0.44426	0.407774	0.521648	0.403546	0.478414	0.267556	0.269133	1.33251	0.166242	1.00551	0.589388	0.728752	0.168111	1.42031	0.259353	0.282795	0.274719	0.287179	0.224194	0.101862	0.0999749	0.589493	0.818174	0.766963	0.6937	0.605621	0.244872	0.100893	1.11282	0.166001	2.12245	0.104625	0.887232
b0935	ssuD alkanesulfonate monooxygenase, FMNH 2 -dependent	0.313121	0.36655	0.478671	0.868537	0.21668	0.196753	0.200569	0.357409	0.345056	0.654873	0.259245	0.636124	0.38607	0.323107	0.703885	0.7971	0.636475	0.338751	0.465151	0.502705	0.262509	0.341288	1.70243	0.252053	0.232849	0.213309	0.514591	0.230818	0.670171	0.344057	0.420477	0.317362	0.563941	0.456832	0.223861	0.269961	0.453	0.352277	0.211457	0.364831	0.270175	0.870114	0.200767	0.509317	0.290087	0.35206	0.242496	0.469555
b0936	ssuA aliphatic sulfonate ABC transporter	1.18897	0.999356	1.12909	1.31477	0.74277	0.67316	0.43477	0.41271	0.757623	0.580132	0.210667	0.49903	0.322838	0.271197	0.969553	0.533892	0.766116	0.371401	0.416219	0.903941	0.525331	0.442285	0.53744	0.748222	0.553208	0.217333	1.35354	1.06541	0.947965	0.833817	0.905427	0.568564	1.01855	1.26165	0.664305	0.830723	0.7891	0.333133	0.834621	1.36035	0.204548	1.05575	0.231101	0.635467	0.866794	0.486921	0.265535	1.23548
b0937	ssuE NAD(P)H-dependent FMN reductase monomer	1.60899	1.45839	0.736966	1.60191	0.805829	0.550562	1.7196	1.48055	0.771666	0.82895	0.411766	1.71189	0.526639	0.584536	0.72658	2.23912	1.1092	0.620187	0.707549	0.732701	0.441592	0.530081	0.67259	1.11443	0.298712	0.580606	1.19857	1.77897	1.29109	1.03096	1.14473	1.12357	0.717724	2.76121	0.392881	0.585517	0.873022	1.25877	0.535704	1.56943	1.03954	0.742441	0.408903	0.465398	0.386326	1.46627	0.507524	1.43096
b0939	ycbR predicted periplasmic pilin chaperone	5.63499	3.50392	5.22614	3.11238	5.64788	5.74503	2.44559	2.21774	1.91588	2.72407	2.30382	4.19277	1.13916	0.337142	1.72374	4.84812	3.53153	3.25896	2.99141	3.59888	4.57808	4.00248	2.42592	5.45897	3.42866	3.96583	3.93065	3.46956	3.02969	5.12518	4.20888	3.72098	5.47178	1.60638	5.39954	4.05846	3.57443	2.4977	2.70201	4.17947	3.26329	2.57966	4.35811	1.43827	2.53003	4.61314	6.01617	2.91326
b0940	ycbS predicted outer membrane usher protein	3.85766	3.321	2.74722	3.10237	3.403	3.81444	1.1357	2.2312	3.59303	1.66839	1.41449	1.7517	0.630785	1.05832	2.55322	2.5877	1.92628	2.24551	2.68645	2.79839	1.3409	1.40755	1.60083	3.68042	2.12235	3.04655	1.88698	2.67258	1.89661	2.59827	3.27921	3.78393	1.43025	2.24809	2.02282	2.44987	6.91444	4.33815	7.75814	2.33967	2.3476	2.04835	4.8389	1.93449	3.90329	1.6266	3.76645	1.04756
b0941	ycbT predicted fimbrial-like adhesin protein	2.38521	1.94579	1.14938	0.810136	2.22989	2.66788	0.488886	1.63914	1.45163	1.12892	0.410694	2.66828	0.451352	0.582898	1.87427	1.23853	1.51831	1.76035	1.82874	1.93054	1.28602	1.47561	1.65819	0.814355	1.80867	1.91361	2.09543	2.26806	1.38278	1.98726	1.984	2.1623	1.12481	1.1649	0.644137	0.555646	2.56535	2.48176	3.50142	2.14673	4.05067	1.30984	1.04834	2.01788	0.408124	1.49911	2.19772	1.77021
b0942	ycbU predicted fimbrial-like adhesin protein	1.33362	1.46381	1.01459	0.550721	1.18206	0.791703	2.22407	1.19237	1.31226	1.38398	4.48092	1.81778	1.36902	0.568417	1.23537	0.725779	1.67599	1.17089	1.07454	1.29183	1.78339	1.43195	0.996478	0.414475	2.6225	2.95554	1.44127	1.267	1.75106	1.11784	1.03189	1.49338	0.715894	2.88994	0.262128	0.232869	1.26023	0.406167	0.85739	0.896937	0.671475	1.31314	1.02941	1.38511	1.02945	1.98687	1.06149	1.29032
b0943	ycbV predicted fimbrial-like adhesin protein	1.89813	1.46313	1.58253	0.5584	0.654275	1.4351	1.43834	1.49769	1.19198	1.18393	0.442337	LQ	0.432587	0.943773	0.784877	0.828698	1.59976	1.6147	1.51927	0.74401	1.60177	1.87878	0.698228	0.889625	1.72649	1.15814	1.47367	2.70778	2.1931	1.94355	1.85887	1.93826	1.10698	1.66749	0.229155	0.21335	2.56305	0.443459	1.18674	1.11171	3.96794	1.25063	1.14488	1.18208	0.270931	1.3275	0.982146	0.729281
b0944	ycbF predicted periplasmic pilin chaperone	0.58151	0.771778	0.827205	0.503361	1.02853	0.64351	0.566185	0.627517	0.747587	1.08544	0.17778	1.60359	0.259411	0.545229	0.644709	0.321315	0.667634	1.34676	1.40988	0.717474	0.235124	0.264876	0.875972	0.510064	0.795774	0.663051	0.859518	0.617108	0.740687	0.536948	0.635324	1.01914	0.957604	0.761698	0.0831145	0.123894	0.791826	0.16409	0.78437	0.546078	0.396076	0.585177	0.695364	0.396355	0.550431	0.819012	0.945224	0.351829
b0945	pyrD dihydroorotate oxidase	0.379698	0.454679	0.371775	0.400894	0.429596	0.393979	0.793341	0.428731	0.968041	1.12326	0.115879	0.466247	0.409036	0.317154	0.48527	0.480278	0.25697	0.431181	0.49761	0.203816	0.183067	0.21564	0.401692	0.811284	0.546223	0.260021	0.424541	0.765948	0.311814	0.63331	0.670409	0.677485	0.459931	0.40404	0.105859	0.120554	0.382354	0.194141	0.637594	0.953927	0.18595	0.626733	0.239624	0.31365	0.228469	0.200508	0.279144	0.17105
b0946	ycbW predicted protein	1.6059	1.45414	0.757484	1.23969	1.62823	0.591689	0.414261	0.446016	0.812526	0.644194	0.241122	0.699804	0.551572	0.393998	1.2941	1.46919	1.15355	1.26642	1.07335	0.575478	0.722769	0.889037	0.669735	0.554446	0.607056	2.38551	1.05968	1.05441	2.06764	0.834349	0.906423	0.726937	1.42282	1.83266	0.282947	0.363179	1.25554	0.622831	0.559562	1.20423	0.857544	0.711713	1.44407	1.5347	0.578638	0.701923	0.664804	0.282942
b0947	ycbX predicted 2Fe-2S cluster-containing protein	0.739304	1.05995	0.97055	0.576003	0.362562	0.560137	0.762742	0.313128	0.678283	0.533017	0.416464	0.282444	0.509111	0.269228	0.691958	1.27838	1.02222	0.982946	0.88421	0.753924	1.5127	1.87521	0.531553	0.416552	0.987024	0.397652	0.657694	1.33249	0.454389	1.25267	1.23334	0.576147	0.997636	0.581276	0.943037	1.10903	1.02649	0.682198	0.397138	1.4221	0.18746	1.20246	0.678108	0.953126	0.21731	0.430832	0.399327	0.556173
b0948	rlmL 23S rRNA m 2G2445 methyltransferase	0.714093	1.00508	0.866808	0.704231	0.935249	0.884207	0.270221	0.667656	0.792953	0.356258	1.43074	0.599051	0.227403	0.292085	0.987286	1.59091	0.671763	0.79544	0.735867	0.745518	0.392108	0.473895	0.601044	0.180492	0.676252	0.430417	0.870624	0.66703	1.27201	0.947646	0.995671	0.747496	0.891899	0.483205	0.943743	1.04844	1.12809	0.745721	0.698358	0.791912	0.120548	0.500677	0.562053	0.634115	0.15438	0.760521	1.1454	0.501915
b0949	uup ATP-binding protein with possible role in replication	0.840339	0.637839	0.620956	0.725444	0.418572	0.262804	0.491326	0.471255	0.636489	0.343482	1.10255	0.873275	0.210232	0.530446	0.683254	0.837343	0.474621	0.721592	0.6119	0.276196	0.515674	0.55101	0.572753	0.367647	0.116581	0.196004	0.681856	0.305513	0.649851	0.676514	0.545044	0.595567	0.576237	0.413874	0.273495	0.240359	1.00136	0.781411	0.559855	0.352483	0.150202	0.325168	0.335982	0.390458	0.146689	0.85407	0.790549	0.202616
b0950	pqiA paraquat-inducible protein A	0.456898	0.890625	0.768596	0.41642	0.248768	0.437687	1.39125	0.738184	0.492508	0.49065	0.157717	0.792524	0.246345	0.218886	0.428799	0.182388	0.878721	0.473366	0.426452	0.60059	0.121551	0.105352	0.372327	0.383928	0.367954	0.740614	1.52325	0.431256	0.257655	0.233294	0.230373	0.67605	0.592337	0.645818	1.61661	1.99359	0.806163	0.902289	0.259747	1.04661	0.265248	0.947395	0.134498	1.785	0.322468	0.3395	0.268921	0.138391
b0951	pqiB paraquat-inducible protein B	1.02613	0.667555	0.493325	0.54405	0.272846	0.443233	0.510846	0.465181	0.766362	0.582345	0.36698	0.354979	0.433885	0.298407	0.819464	0.74232	0.491634	0.712577	0.66325	0.661143	0.226054	0.260553	0.318823	0.617466	0.309292	0.416003	0.745082	0.637398	0.37045	0.394244	0.338696	0.806948	1.32428	0.83467	0.849972	0.526277	0.651052	0.760067	0.290719	0.870332	0.507807	0.440735	0.16642	0.450514	0.312243	0.553591	0.276649	0.627173
b0952	ymbA conserved protein	1.00683	1.21989	1.70996	0.80971	0.254673	0.977187	1.59814	0.340764	0.711012	0.879368	0.843411	1.25047	2.08632	0.465326	0.416437	0.605772	0.935456	0.550531	0.50118	0.987379	0.264695	0.281425	0.616428	0.298755	3.80632	0.803345	0.828312	0.625047	0.459524	0.42504	0.4281	0.851276	2.48251	3.32818	0.501423	0.480817	1.35	1.18294	0.598617	0.454693	0.242577	0.715218	0.598182	0.530336	0.33141	2.11469	0.258476	0.372737
b0953	rmf ribosome modulation factor	0.723364	0.905267	0.901274	0.807652	0.634782	0.62075	0.403407	0.856459	0.553294	0.929474	0.54421	LQ	0.687381	0.950567	0.842791	1.12197	0.535656	0.745518	0.83683	0.441826	0.771479	0.766339	1.04068	0.597944	0.489579	0.683788	1.04464	0.732729	0.97421	0.778027	0.838692	0.459037	1.06025	1.19189	0.661151	0.68974	0.5274	0.733902	1.20276	0.806027	0.614081	1.40197	0.644337	1.03247	0.570156	0.509621	0.63753	0.630446
b0954	fabA beta;-hydroxyacyl-ACP dehydrase [multifunctional]	0.26843	0.323853	0.215585	0.509212	0.130323	0.193412	0.187704	0.212255	0.437254	0.335191	0.17648	0.272729	0.32133	0.288097	0.402122	0.281675	0.221835	0.198359	0.198544	0.199606	0.164335	0.139978	0.379901	0.120553	0.875314	0.181915	0.35892	0.17438	0.408353	0.559852	0.548363	0.368389	0.281172	0.40356	0.15331	0.177846	0.279963	0.319369	0.590587	0.399777	0.153373	0.380427	0.141823	0.216386	0.122303	0.340598	0.162354	0.480709
b0955	ycbZ putative ATP-dependent protease	0.494024	0.662649	0.385757	0.196844	0.446029	1.07002	0.529389	0.48952	0.44506	0.912422	0.146257	0.619563	1.01549	0.831616	0.199698	0.286188	0.198835	0.260279	0.206876	0.266284	0.154147	0.117183	0.721424	0.243165	2.63047	0.233019	0.525879	0.386971	1.34114	1.04138	1.10793	0.591186	0.755195	0.719745	0.119059	0.123704	0.259777	1.69426	0.265536	0.260333	0.42128	0.76208	0.536427	0.316625	0.108317	1.28422	0.637144	0.387553
b0957	ompA outer membrane protein 3a (II*;G;d)	0.359691	0.309621	0.340269	0.385894	0.263576	0.216997	0.276584	0.292827	0.238902	0.296957	0.263328	0.277982	0.207504	0.340309	0.279149	0.413888	0.293917	0.328571	0.31361	0.315283	0.209215	0.23794	0.383007	0.179283	0.189311	0.200758	0.427495	0.295465	0.398258	0.297285	0.296222	0.256543	0.395971	0.434426	0.193673	0.135895	0.250275	0.37142	0.152505	0.258897	0.142895	0.527645	0.145491	0.387066	0.142446	0.244355	0.279462	0.299661
b0958	sulA SOS cell division inhibitor	2.29462	1.06182	2.19187	0.483053	0.0496961	0.282821	0.528064	0.235853	0.782571	LQ	0.446509	LQ	0.673502	0.54695	0.734226	0.046118	0.561521	1.15907	0.554843	0.690776	0.0503352	0.150532	1.05844	4.24994	0.659231	3.95601	0.458712	3.13988	0.92424	0.505382	0.517937	0.979648	0.396065	0.35828	0.00905471	0.0909475	0.860802	0.681758	1.09413	1.06893	3.50751	0.864712	0.258328	0.067592	0.0366594	0.32994	0.760467	3.91167
b0959	sxy transcriptional coactivator for CRP	1.21468	1.01967	0.592346	1.05213	0.515342	0.770532	0.694649	0.643494	0.739873	1.32556	0.242271	1.20037	1.2193	0.694479	0.474528	0.550387	0.94195	0.745156	0.705588	0.857281	0.48192	0.491032	0.49567	0.667235	0.427306	1.99979	0.928766	0.631323	0.637966	1.41884	1.34068	0.744282	0.546565	1.21496	0.879874	1.21047	1.27745	1.45799	0.840912	1.18199	0.509304	1.60011	0.406785	0.485623	1.2017	0.749092	2.40066	0.689184
b0960	yccS hypothetical protein	1.92664	1.04798	1.39368	0.846484	1.16554	1.52026	1.27931	0.45364	1.27631	0.928632	0.17245	1.28783	0.22975	0.652099	0.713413	1.28768	0.54758	0.890842	0.871528	0.8714	0.580418	0.63693	0.404761	0.206634	1.92676	1.11931	1.23377	0.922933	1.58436	1.7345	1.72472	0.848735	2.09576	1.4178	0.557185	0.657015	1.37452	1.60145	1.43536	1.6254	1.17011	1.85198	0.9498	1.39964	0.230237	1.85896	1.21177	1.48267
b0961	yccF conserved hypothetical protein	0.84315	2.0571	1.07193	2.21628	1.13532	0.529111	0.537172	0.856641	1.06061	1.29587	0.392968	0.56888	0.800828	0.410781	1.1204	0.979533	1.80726	1.71695	1.36801	0.886992	0.454649	0.46308	0.92782	0.76357	2.27611	1.66906	1.33841	2.70566	1.30678	1.05567	0.998885	1.81007	3.93695	1.66139	2.38527	2.39495	1.279	0.599609	0.76446	1.79465	0.330314	0.795731	2.26838	1.18691	2.20594	0.962987	0.689954	2.96488
b0962	helD DNA helicase IV	0.529105	0.960595	0.670692	0.91915	0.93277	0.563741	1.02328	0.431955	0.833951	0.95572	0.385091	0.81646	0.566235	0.593698	0.836317	1.12469	1.29929	0.691398	0.709575	1.44525	0.751787	0.880769	1.13004	1.07358	0.420707	0.321553	0.736945	0.583258	0.527146	0.464624	0.516955	1.10795	0.50539	1.01066	0.276671	0.33554	0.89539	1.13659	0.484624	0.691373	1.15168	0.418406	0.598232	0.904893	0.155508	0.33288	0.306644	1.2415
b0963	mgsA methylglyoxal synthase	0.863428	1.11919	1.19467	0.71627	0.358756	0.713576	0.726096	0.702711	0.584162	0.883616	0.320555	0.903582	0.603589	1.62492	0.863251	4.08556	1.12764	1.17968	1.18287	0.656975	0.601303	0.637365	1.54975	0.436369	0.242593	0.759802	1.45649	0.743611	1.3192	1.00254	1.14622	1.16739	0.788466	1.49455	0.213464	0.265566	0.791588	0.517038	0.565127	1.14928	0.484005	0.870023	1.643	0.832221	0.241562	3.9285	0.582136	1.08279
b0964	yccT conserved protein	1.14127	1.35791	1.40856	0.661195	1.00482	0.610147	1.21596	0.509364	1.07839	1.15406	0.868011	1.82228	0.653706	1.26561	1.26068	1.63037	1.34476	0.964771	1.02415	1.02391	1.90987	2.14682	1.00088	0.976836	0.321769	0.73669	0.912999	0.857238	1.08455	0.861489	0.983525	0.647199	0.441845	1.55277	0.228	0.255499	0.965275	1.18664	1.43382	1.1513	1.33766	0.841105	0.644993	0.898537	0.547264	1.03384	0.658985	0.724537
b0965	yccU predicted CoA-binding protein with NAD(P)-binding Rossmann-fold domain	0.88732	1.06619	0.994131	1.72057	0.303169	1.68476	1.26382	0.779858	0.827074	1.22534	1.18398	0.898975	1.37582	0.614356	1.56053	1.36649	1.73254	1.3643	1.18937	2.00574	2.37915	1.96858	1.08893	0.359488	1.45726	2.30122	1.27124	0.773615	1.14061	1.03845	1.02975	1.19323	0.446049	1.79788	0.219253	0.282674	0.68742	0.804569	0.397805	1.35732	0.49517	1.87471	0.665311	0.907483	0.336271	2.46132	0.768729	2.17169
b0966	hspQ heat shock protein, hemimethylated DNA-binding protein	0.560899	0.502393	0.579961	1.02688	0.470206	0.694312	0.8978	1.22547	0.428728	1.04837	0.415438	0.781823	0.602245	1.98421	0.75441	0.675157	0.827391	1.28019	1.33834	0.558635	0.411762	0.603263	0.54164	5.15211	0.521445	0.509816	0.973201	1.12138	0.823349	0.400233	0.533146	0.629727	0.610697	1.00536	0.249769	0.357949	0.331622	1.213	0.368734	0.678771	0.51941	1.04838	0.353863	1.23343	0.327154	0.746591	0.440512	0.889836
b0967	yccW predicted methyltransferase	0.346313	0.818503	0.879604	1.13047	0.249111	0.494741	0.570736	0.427335	0.910842	1.22691	0.681086	0.541499	0.507322	0.727372	0.752019	0.350204	0.6417	0.639214	0.722103	0.835605	0.272136	0.338624	0.454428	0.248754	1.25174	1.73337	1.04015	0.795696	0.855622	0.572674	0.727774	0.665947	0.437342	1.04786	0.411647	0.494252	0.510793	0.737937	0.903263	1.01515	0.335833	1.24112	1.04007	0.866406	0.264288	1.33722	0.257662	1.08335
b0968	yccX acylphosphatase	0.99077	0.976495	1.27139	0.78593	1.14149	3.64609	0.783206	0.853298	0.599908	0.923126	2.00048	0.887447	1.04856	1.14975	0.561946	0.846156	0.82945	0.690601	0.766468	1.51066	0.437456	0.60383	0.709325	0.388237	0.371613	0.514089	1.12463	0.599524	0.682911	0.484045	0.583795	0.665648	0.848477	1.43896	0.434451	0.494823	0.742632	0.511986	0.311607	1.4884	0.885491	1.38173	0.561807	1.13972	0.352485	1.16445	1.85971	0.820293
b0969	tusE sulfur transfer protein	1.47202	0.687559	1.22353	0.558945	0.926428	0.57919	1.51464	0.532283	0.745172	1.06728	0.454485	1.19856	0.849723	1.6617	0.845775	0.887816	0.881483	0.562146	0.648962	0.77024	1.16031	0.921964	1.36924	0.585803	0.412378	0.692504	1.08375	0.912804	0.536262	0.521173	0.593134	0.634275	0.645409	0.960303	0.341082	0.387281	0.628994	0.445452	0.827313	1.38491	0.419194	0.788769	1.04712	0.715868	0.330303	0.719824	0.406604	1.70217
b0970	yccA putative carrier/transport protein; substrate or modulator of FtsH-mediated proteolysis	4.56546	0.918943	1.49919	0.731921	0.715093	0.494876	0.324976	0.194547	0.383287	0.907382	0.277508	0.564195	0.304556	0.31223	1.24907	2.10792	0.936841	0.906298	0.900092	0.589739	0.508571	0.441678	1.23899	1.13395	0.705211	3.3663	1.4205	1.00903	0.464177	0.812491	0.70575	0.800684	0.456763	1.31321	2.33901	1.91823	1.19662	0.486212	1.17383	3.11047	0.255546	0.333934	0.287515	2.64221	0.114627	0.823693	0.229312	0.848739
b0972	hyaA hydrogenase 1, small subunit	0.413309	0.53258	0.795739	0.484021	0.244234	0.497976	0.786678	0.543609	0.652646	0.737747	0.653202	0.540322	0.320021	0.423715	0.537799	0.450922	0.623927	0.850903	0.891213	0.975524	0.614655	0.704661	0.383369	2.42654	0.0905067	0.109271	0.80308	0.413454	0.553688	0.683543	0.749036	0.590876	0.967816	0.933598	0.115127	0.144533	0.378583	0.357563	0.605519	0.476103	1.21089	0.396237	0.776993	0.696067	0.115454	0.977019	0.540254	0.308043
b0973	hyaB hydrogenase 1, large subunit	0.933502	0.947581	0.990555	0.720924	0.487976	0.537466	1.07356	0.297334	0.854995	0.539063	0.251513	0.493998	0.284374	0.900301	1.0952	1.65797	0.819334	1.01739	0.950103	0.750485	0.195601	0.191389	0.776969	0.197022	0.541061	0.468196	0.772825	1.05668	1.18874	0.737983	0.758164	0.483624	0.586126	0.565019	0.609206	0.503177	1.04279	0.499703	1.1495	0.52646	0.514152	0.81488	0.451824	0.926106	0.194168	0.397428	0.375822	0.162608
b0974	hyaC hydrogenase 1, b-type cytochrome subunit	1.00883	1.84766	1.02445	0.851983	0.455033	1.32306	0.55762	0.428337	1.35698	0.824234	0.275531	0.663416	0.368472	1.1901	1.09456	0.474972	1.13575	0.879375	0.959577	0.536858	0.220448	0.209975	0.640036	0.218964	0.372037	0.198936	2.27829	1.31554	1.52556	0.772378	0.860769	0.555638	0.766327	1.08665	0.105553	0.163988	1.34558	0.883689	1.66625	0.78576	0.253402	2.00735	2.05979	2.01679	5.08164	0.65879	2.65951	1.87067
b0975	hyaD protein involved in processing of HyaA and HyaB proteins	0.374875	0.740996	0.984469	0.590941	0.644675	0.500429	0.802189	0.425728	0.86088	0.792864	0.718557	0.426422	0.232189	1.23557	0.937693	0.61991	0.673779	1.16478	1.08819	0.704937	0.192617	0.267218	0.597567	0.225398	0.154499	0.160466	0.724324	0.503822	0.940737	0.624662	0.757663	0.592564	0.533605	1.35109	0.123939	0.131131	0.754161	1.441	0.544342	0.401085	0.157489	0.606462	1.27765	0.70183	1.8899	0.461407	0.682012	0.476384
b0976	hyaE protein involved in processing of HyaA and HyaB proteins	0.445373	0.757818	0.888582	1.01664	0.424701	0.59728	1.92188	1.06562	0.690833	0.694099	0.324253	0.652549	0.464549	0.898783	1.09258	1.132	0.926586	0.767268	0.874654	0.807334	0.314976	0.40896	1.79496	0.41584	0.350362	0.312507	0.817794	1.04202	0.936851	0.914284	1.09483	0.70984	1.19877	0.717803	0.216829	0.23733	0.504039	0.869993	1.32574	0.501144	0.39716	1.03919	1.06799	1.14921	0.555634	1.84556	0.351448	0.329829
b0977	hyaF protein involved in nickel incorporation into hydrogenase 1 proteins	0.520654	1.57211	0.860562	2.24965	1.6475	1.18619	1.50389	1.90667	1.27881	1.09619	0.229049	0.362531	0.650248	0.89812	1.63992	1.19418	1.92231	LQ	1.08208	0.832044	1.2498	1.23696	1.41516	0.182589	0.914893	0.832829	1.45072	1.584	2.64026	1.40053	1.45083	1.31751	2.57279	0.483257	0.0968698	0.110478	1.50255	3.09265	1.67065	1.2851	0.104556	0.793281	2.86123	1.45122	5.49293	1.38505	0.407863	0.226437
b0978	appC cytochrome bd-II terminal oxidase subunit I	0.321352	1.4123	0.588513	1.37542	0.241157	0.833446	1.82181	0.269567	0.926163	1.17353	0.258843	0.471902	0.630955	0.941163	0.755829	0.647268	1.27204	0.765846	0.801028	0.818543	0.636824	0.605964	0.680916	1.96596	0.655992	0.307932	1.81132	0.906683	0.824564	0.697107	0.730046	0.612149	0.604571	0.42061	0.256246	0.259824	0.363531	0.861191	0.31017	1.05906	0.100575	0.893785	0.28417	1.25749	0.148373	1.03737	0.258198	0.760775
b0979	appB cytochrome bd-II terminal oxidase subunit II	1.85591	2.10721	0.778361	0.738226	0.227574	0.862126	0.588606	0.368563	1.02096	1.55586	1.74521	1.3698	0.755315	0.809132	1.00102	0.93153	1.43746	1.44677	1.485	0.651937	0.365412	0.403485	2.18223	3.59999	0.106341	0.432882	1.34496	1.07253	0.805821	1.80549	1.75725	1.22605	1.8393	0.835921	0.550916	0.525913	0.937222	0.86677	0.445555	1.37459	0.450851	1.13342	1.90593	1.37042	0.157777	1.56757	1.0714	0.874492
b0980	appA acid phosphatase	0.626404	0.765575	0.648007	0.747375	0.196679	0.667853	1.11016	0.327678	0.750019	0.891465	0.732261	0.654987	0.48855	0.978742	0.739333	0.538943	1.1043	0.481436	0.531731	0.436183	0.643708	0.965789	0.489682	1.31013	0.124658	0.257357	0.946958	0.490263	0.565361	0.629094	0.629265	0.473084	0.649151	0.641246	0.366931	0.388405	0.650875	0.988533	0.593637	0.88609	0.199965	0.726821	1.72912	0.88318	1.16513	0.429458	0.420497	0.369214
b0981	etk autophosphorylating protein tyrosine kinase	1.09441	1.13544	0.886832	0.866439	0.9064	0.862112	0.557417	0.968719	1.07283	0.957356	0.261892	1.16633	0.556529	0.87541	1.3763	2.29635	1.20963	1.14087	0.981803	1.00391	0.820868	0.667566	0.816679	0.32486	0.624406	0.487346	1.0721	1.15716	1.6075	1.59445	1.57098	0.80742	0.691518	0.656202	2.63125	2.45547	1.27919	1.43915	1.02746	1.06101	0.35616	0.720201	1.95413	0.764921	0.197047	1.06697	0.762495	0.270563
b0982	etp phosphotyrosine-protein phosphatase	1.01152	0.915627	1.65722	0.608258	0.357044	0.553429	0.495065	2.37648	0.904502	1.1538	0.402123	1.15095	1.68969	0.78607	1.04117	0.997841	1.28227	1.07163	0.979747	1.65597	0.377296	0.474507	0.731946	0.395068	3.3108	0.981471	1.29205	0.703613	1.35887	0.826872	0.92259	0.984491	1.14709	1.89449	0.316264	0.454502	0.748612	0.498006	0.895918	1.14083	0.305092	1.14099	0.90878	1.38137	0.847748	1.04133	0.628325	3.66941
b0983	gfcE predicted exopolysaccharide export protein	0.925312	0.947995	1.11742	1.03576	0.432015	0.603344	0.980339	1.31949	0.768019	0.889062	0.391397	LQ	0.739491	0.791908	1.07523	1.1805	1.40772	0.83729	0.850119	0.858692	0.761088	0.704667	1.24355	0.61707	0.384841	0.796068	1.28528	0.640642	0.913179	0.694732	0.68741	0.652145	1.36754	1.21735	0.616625	0.479101	0.590585	1.10151	0.406165	0.952402	0.506747	0.993082	0.574117	0.954253	0.625992	0.78242	0.598302	1.1763
b0984	gfcD putative lipoprotein	0.673567	1.29412	1.03103	1.51083	1.352	0.787507	1.29678	0.87062	0.8969	0.966469	1.70266	1.03584	0.47474	0.515304	1.2602	1.30066	0.924725	1.15284	1.11281	0.969694	0.433509	0.538228	0.822481	0.278283	0.80658	0.693137	0.859213	1.48683	1.47561	0.597008	0.716611	0.685708	0.575034	1.38438	0.246009	0.373071	1.17345	1.2304	0.884914	1.40278	0.960781	1.29923	0.472816	1.69457	1.38128	1.21595	0.72661	0.800941
b0985	gfcC conserved protein	2.19565	1.79346	2.01273	1.98024	1.74244	2.72627	1.0388	1.47768	1.78155	1.10857	0.389998	0.958437	1.01561	0.759798	2.85581	4.86684	1.85906	2.15479	2.26915	1.98467	2.82401	3.01804	1.1671	0.787995	2.46538	2.44792	1.57817	1.83096	2.06275	1.26476	1.49725	1.39125	0.650338	2.38307	0.406811	0.478702	2.14339	2.338	1.4116	1.81693	0.441798	0.936857	2.22434	1.76096	0.349704	1.50269	1.54806	1.97047
b0986	gfcB predicted outer membrane lipoprotein	5.23141	5.09114	3.22099	4.19305	8.65136	6.66173	5.10116	3.68703	3.31917	2.16762	0.85064	2.43451	1.7395	0.479212	4.9028	4.4333	3.30826	5.32714	5.67211	4.74899	9.25536	10.2851	1.29961	4.06535	3.66318	3.74496	4.53416	3.85396	4.51468	4.33848	4.96858	3.49653	2.9596	3.16688	1.02874	0.752211	5.51099	5.52358	5.18938	5.69657	4.9805	5.52068	6.98353	6.0795	0.548893	4.43075	3.58865	2.52997
b0987	gfcA predicted protein	2.88004	2.34722	2.05431	1.12849	0.693167	2.55221	3.70671	1.87229	1.3431	1.14562	6.04647	0.827772	0.712476	0.626073	2.1594	1.26913	1.89185	3.66065	3.26473	1.88088	1.05177	1.13833	1.50971	1.61948	1.58045	1.42792	1.58261	1.94349	2.24899	2.36176	2.39629	1.45875	3.21731	2.30694	0.488001	0.566593	2.14251	2.08827	0.516386	2.08441	0.613048	2.78319	1.00451	2.10997	2.70552	1.96005	1.96103	1.05784
b0989	cspH stress protein, member of the CspA family	2.60368	2.52428	3.066	1.83994	3.5213	1.51036	6.62347	1.06318	2.53266	0.716312	6.68843	1.38573	4.11622	0.934412	3.47851	2.00567	1.48918	0.972725	0.933286	5.85599	4.64645	4.29488	1.99446	1.15061	0.866848	2.30022	2.05828	1.93078	3.28889	3.21347	2.40652	2.38932	3.98287	2.70679	0.470675	0.522535	5.36998	1.88573	3.76058	2.03966	1.38999	2.64408	2.22518	2.31341	2.41086	3.57315	2.84503	2.03864
b0991	ymcE YmcE	1.09987	1.34388	1.41028	1.48539	0.795185	1.44208	0.964182	LQ	0.870982	LQ	1.07224	LQ	1.1068	1.17801	1.05392	1.76711	1.34413	1.10779	1.25812	1.11107	1.39348	1.32254	1.25263	0.908015	2.39223	0.993407	1.35225	1.1874	1.25443	1.27896	1.28714	0.947666	1.89905	1.49556	0.639554	0.812115	0.879795	0.904158	0.843176	1.0802	0.965241	1.64444	0.820797	1.31365	0.82524	1.31031	0.941342	0.842389
b0992	yccM hypothetical protein	2.81004	1.70601	1.73567	2.48652	1.5709	1.30681	2.53627	0.87528	LQ	1.3606	1.26979	1.03958	LQ	0.8416	1.50811	0.731204	3.08999	2.48647	2.43924	3.14885	1.60377	1.65195	0.832949	1.39338	0.917635	4.49548	1.97508	1.49869	1.46322	2.28515	1.96796	1.87531	0.480642	2.41024	0.226381	0.244472	1.09807	1.31819	LQ	2.40125	0.748774	1.56925	0.983519	1.3704	0.231002	2.68797	0.525172	2.44319
b0993	torS TorS-P his850	0.480648	0.695773	0.768833	0.834691	0.245979	0.328966	0.806339	0.961705	0.563846	0.505332	0.15958	0.466808	0.159321	0.762694	0.840777	1.92181	0.830976	0.768845	0.686067	0.838861	1.46432	1.52121	0.738453	0.439936	0.476859	0.330135	0.752419	0.458578	0.792766	0.657545	0.585765	0.446234	0.830781	0.713546	0.319743	0.228137	0.573151	0.704005	1.03749	0.427589	0.172459	0.831219	0.596134	0.610744	0.185388	0.559424	0.706928	0.305804
b0994	torT TorT-TMAO	0.723834	0.77421	0.369036	0.376095	0.161558	0.284222	1.31368	0.634711	0.521786	0.968853	0.368272	0.498436	0.530969	1.34054	0.980788	1.6543	0.72475	1.18684	1.29826	0.4738	1.72262	2.21574	0.693413	0.190087	0.373051	0.539583	1.05691	0.237061	0.659037	0.696573	0.692434	0.832448	0.512108	0.942192	1.62298	1.82025	0.641189	0.456297	0.783926	1.33573	0.17601	0.954285	1.36268	1.36599	0.157474	0.76482	0.412275	0.525028
b0995	torR TorR transcriptional dual regulator	0.545965	0.616707	0.221653	0.771725	0.252682	0.655779	0.521533	1.6676	0.547023	0.573577	0.168697	0.327991	0.461428	0.422552	1.02636	0.38341	0.641791	0.450573	0.575823	0.591849	1.20294	1.46824	1.13626	0.514379	0.182727	0.233073	0.787383	0.55222	0.343498	0.676565	0.742476	0.643339	0.388514	0.667179	0.156925	0.253146	0.374619	0.346642	0.99236	0.41982	0.232692	0.928957	1.79978	0.528097	0.183568	0.572334	0.19461	0.22996
b0996	torC TorC trimethylamine N-oxide reductase, cytochrome c-type subunit	0.498303	0.750361	0.684477	1.10969	0.153491	0.410224	0.971901	2.49589	0.678093	0.429714	0.673873	0.483558	0.909129	0.37647	0.602668	0.931958	0.723834	0.813823	0.683388	1.0652	0.968849	1.12551	0.556281	0.731556	0.163991	0.463706	0.586467	0.686373	0.516939	0.588141	0.469619	0.677405	0.580362	1.01359	0.121873	0.132331	0.380255	0.47723	0.67617	0.89664	0.168825	0.797148	0.573793	0.667875	0.722399	0.642372	0.406832	0.701453
[truncated: 3,097 more rows]
[truncated: 5 more columns]
