# Supplementary material for: Genetic Architecture of Intrinsic Antibiotic Susceptibility
Source: PLoS One. 2009 May 20;4(5):e5629. doi: 10.1371/journal.pone.0005629 (PMC2680486; doi:10.1371/journal.pone.0005629)
Supplement: Dataset S3 — Z-scores for individual hybridization computed relative to five hybridizations of the original, unselected library. (3.58 MB XLS) [file pone.0005629.s022.xls]

## Sheet: S3-z relative unselected
Dataset S3: z-scores for individual hybridization computed relative to five hybridizations of the original, unselected library.
Note that repetitions two and three for PIP, FOX, TET, TRM are technical, not biological, replicates and were averaged.
LQ= Low quality array data
Average is the average of the five hybridizations of the original, unseleccted library from Girgis et al. (2007); stdev is the standard deviation with the global component added in.
bnum	Description	Average	Stdev	AMK_R1	AMK_R2	GEN_R1	GEN_R2	STR_R1	STR_R2	TOB_R1	TOB_R2	AMP_R1	AMP_R2	FOX_R1	FOX_R2	FOX_R3	PIP_R1	PIP_R2	PIP_R3	LOM_R1	LOM_R2	NAL_R1	NAL_R2	SLF_R1	SLF_R2	TRM_R1	TRM_R2	TRM_R3	DOX_R1	DOX_R2	TET_R1	TET_R2	TET_R3	ERY_R1	ERY_R2	FUS_R1	FUS_R2	BLM_R1	BLM_R2	NIT_R1	NIT_R2	DOX_R3	SLF_R3	AMP_R3	LOM_R3
b0002	thrA aspartate kinase / homoserine dehydrogenase	0.205694	0.54259	0.133901	0.662421	0.373283	-0.0939611	-1.01956	-2.83648	1.07501	2.60345	0.852406	1.20829	0.42294	0.184953	-0.34681	-1.07717	2.30845	2.45763	-0.171502	1.1935	-2.91872	0.544588	0.873558	-0.0373335	0.212238	-0.855248	-0.707482	-0.571369	0.370474	-0.237933	-3.07422	-2.54724	-0.188422	0.489884	0.255487	-0.214549	-2.50692	-0.436333	-2.78408	-0.179066	-3.57116	-0.536306	-2.78203	-3.99715
b0003	thrB homoserine kinase	0.398098	0.384814	-0.0665179	-2.2411	-1.21194	-0.644646	-3.60782	-4.38716	0.159486	2.42031	-0.102894	-4.91701	-0.524595	0.0322925	0.0703278	0.723749	-2.26535	-1.91751	-2.84255	-3.33335	0.538078	-6.87786	-1.53305	-1.92535	-4.2054	-2.03163	-2.31865	-1.68018	-1.23281	0.220746	-8.91748	-8.43183	-2.01628	-4.30572	-1.51241	-0.158829	-5.76823	-1.47969	-4.37367	-1.30932	-5.99604	-0.307453	-6.7631	0.102374
b0004	thrC threonine synthase	0.386345	0.422792	-2.73951	-3.13049	-1.95243	-0.969841	0.620471	-5.72636	-0.0741373	0.652024	-0.54001	0.456231	-0.671606	0.191484	0.18871	1.11071	-0.915992	-0.550351	1.52002	-3.42221	-1.83663	0.140492	-1.04297	-5.23504	-0.97978	-2.90257	-2.73501	-1.6949	-2.59787	0.869248	-4.57227	-4.50101	-2.02269	-4.32272	-3.26867	-1.08886	-2.12887	-0.473003	-6.90702	0.178586	-6.97477	-2.14898	0.324151	0.159954
b0005	yaaX predicted protein	-0.132885	0.411539	-2.34704	1.41578	0.794777	2.20773	1.82155	-1.95117	1.1237	1.144	-0.19486	3.49812	-0.435695	-0.662046	-0.469158	2.4223	-3.36185	-3.03716	-2.45943	7.7297	0.247072	-3.68506	2.91805	-1.13397	2.2447	-0.234624	-0.617434	-0.589185	-0.00484317	-1.65282	-5.33795	-4.77085	-0.294506	-3.87471	-1.37334	-0.951043	4.46896	0.828437	-3.96997	3.07362	-4.72368	-0.631292	-0.0528114	-2.35409
b0006	yaaA conserved protein	0.663004	0.406484	-1.0355	-4.634	-1.37336	-0.0131502	-2.78695	-4.75335	1.48536	-0.0365687	-0.962086	-3.87841	-2.55142	-0.360905	-0.617086	1.54085	-3.35555	-3.77347	-4.82713	-1.80392	-3.02869	-5.5441	0.0128351	0.290379	-2.79793	-0.684219	-1.40437	-0.0526855	-0.0815277	0.250187	-5.25574	-5.39048	-0.940904	-4.11131	-0.938919	-0.602362	-0.212825	2.63777	-6.72883	-1.87832	-8.02058	0.556854	-1.57536	-2.26445
b0007	yaaJ YaaJ alanine AGSS transporter	1.00571	0.745082	-1.13393	-0.739413	-0.397238	-0.612182	-0.894949	-2.90206	-1.07736	0.190984	0.85134	0.88938	-0.0198418	0.00133583	0.157495	1.07709	-0.00285803	0.231276	-0.19885	-0.564105	-5.75097	-3.39065	-1.38149	-0.396667	-3.36746	-2.1061	-1.9834	-0.625074	-0.864591	0.0209386	-5.6119	-6.17115	-1.69593	-1.29273	-1.95835	-1.47386	-3.94947	-0.982292	-0.666255	-0.639943	-3.8605	-1.03118	-0.253833	-1.98966
b0008	talB transaldolase B	0.673074	0.420951	0.853663	-3.06012	-0.58287	0.981333	0.126616	-3.4495	4.34976	4.28932	-3.8335	-1.63352	-2.91539	-3.1315	-3.36704	-4.26804	-1.6829	-1.97525	-2.73245	-5.3554	2.56421	-3.21546	-1.1399	-0.241832	-4.02913	-3.1097	-3.06067	-3.92256	-2.38874	-4.00961	-7.94591	-9.0709	-3.11236	-2.27014	-6.23551	-2.63558	-3.78777	0.205492	-1.92873	-2.77444	-8.04197	-3.66991	-6.35713	-3.57606
b0009	mog predicted molybdochelatase	-0.652188	0.624868	0.0373203	0.236592	1.05138	0.593063	-1.66134	-1.16599	2.07068	3.39634	0.768624	0.677683	0.215988	1.21808	0.789976	1.17418	1.87042	1.36403	0.248349	0.847691	-0.693983	-1.86658	0.497811	0.653535	1.03786	0.490878	0.0465365	0.19958	1.5577	0.621298	-1.95815	-2.28004	0.157661	-2.2881	2.13734	-0.157976	-3.26454	-0.115705	0.571246	1.05493	-3.24586	-0.100936	0.235646	1.47293
b0010	yaaH conserved inner membrane protein associated with acetate transport	0.297679	0.400417	-2.14865	-3.7934	-0.263534	-0.562102	-2.87723	-3.69558	0.644276	-0.354657	-2.23415	-2.76777	-2.19552	-1.82016	-2.56544	-1.91226	1.5311	1.06766	-1.89293	1.57783	-4.31794	-2.52683	1.12762	-0.520528	-0.626336	-1.26439	-1.94031	-3.3003	-3.96175	0.742672	-6.21517	-5.23539	-1.65348	-3.79432	-1.89404	1.97391	-6.96132	-1.52548	-5.63604	-0.686159	-7.35162	-1.94688	-4.60269	-2.13685
b0011	yaaW conserved protein	0.319615	0.39904	-2.25978	-1.64222	-0.340767	LQ	-3.21628	-1.61359	2.33149	0.170227	0.486566	2.32389	0.798221	-0.710354	LQ	0.223619	-5.05655	-2.6187	-3.06726	3.36212	-0.21833	-0.737221	-0.56566	1.04678	0.230989	0.288489	LQ	-1.32521	0.358484	-3.57345	0.0774434	LQ	-0.179341	-0.00657858	0.644944	-0.816375	0.187838	-0.881072	-1.53338	-1.76533	-1.74264	1.38215	0.0176402	-0.212966
b0012	htgA predicted DNA-binding transcriptional regulator	0.536989	0.53388	-3.37158	-0.434476	-0.330937	-1.6287	-4.66927	-2.10696	1.92745	0.414602	0.644982	2.08074	1.01048	-0.882062	-1.20795	0.389878	-3.68426	-3.31676	-2.64167	2.20638	-0.118277	-1.42624	-0.106685	0.485655	0.327824	0.135936	-0.372186	-1.58718	0.105346	-2.23646	-1.15665	-1.1409	0.0591199	-0.510688	0.771643	-1.41525	-0.103303	-0.382415	-2.16431	-1.7395	-4.11863	1.40587	0.248205	0.398349
b0013	yaaI predicted protein	0.907305	0.397244	-3.55083	-1.68861	1.44062	-1.69676	-4.54267	1.39184	-0.838019	0.759578	1.37406	0.765173	-0.442663	-2.53018	-2.20241	-2.5162	-2.38798	-2.68992	0.806661	4.87325	2.38824	2.67632	-0.46389	0.268476	3.43613	0.760081	0.361702	-1.93079	0.179693	-2.51914	4.13659	2.31746	2.91127	3.43295	3.90258	-0.925836	4.52765	2.03427	0.622815	1.67925	3.8907	-3.55084	1.11923	0.419588
b0014	dnaK chaperone Hsp70; DNA biosynthesis; autoregulated heat shock proteins	-2.46575	0.781926	4.47711	6.89561	7.28493	6.80068	1.02977	2.70219	3.70832	4.9792	0.754015	1.67676	1.63049	2.03952	2.04338	0.264708	2.09015	1.78361	2.57048	0.365034	2.83359	1.60061	1.54871	1.49829	1.62208	2.05839	1.64366	0.958137	1.51714	1.75399	0.247395	-0.032453	0.992713	0.657528	0.911714	2.02218	1.93507	2.05047	2.84367	1.16975	0.350357	-0.497584	1.27569	1.46141
b0015	dnaJ chaperone with DnaK; heat shock protein	-1.75894	0.621842	4.19238	6.4384	6.52498	4.62592	2.38122	-0.615354	4.34568	1.99881	3.5975	0.800418	5.50521	5.77905	5.73209	4.82498	4.9527	5.48138	3.11083	1.6391	8.61114	6.28838	2.5521	0.351376	1.33404	2.49721	2.5165	2.2369	1.1161	1.59186	-0.407646	-0.782272	2.59781	3.08022	1.29611	3.25656	3.13796	4.85358	-1.14368	0.983177	0.203196	0.300261	4.3135	5.69079
b0016	insL-1 IS186/IS421 transposase	0.127301	0.426612	-0.311559	0.514207	-0.883819	1.04136	-0.543462	-0.476961	-0.477045	-2.50534	0.0357319	-3.26164	0.143344	-0.519586	-0.518814	0.465674	-1.3196	-1.72498	-4.45924	0.581851	1.38223	0.0648781	1.09793	-0.222666	-0.588446	-0.354593	-0.277389	-0.786362	1.03407	-0.952686	-3.07638	-3.61893	-1.70566	-1.79848	-1.64155	0.0407184	0.795315	-1.06727	-0.486513	-0.0107171	-3.95886	2.57242	-0.96438	0.422599
b0017	yi82_1	-0.507793	0.655439	-0.0359519	0.0826206	-0.0378038	1.43895	-0.916115	0.440075	1.74011	-0.539769	0.703441	-0.845468	1.03552	0.533908	0.462599	1.34032	-1.29165	-0.971269	-1.32559	-1.37057	-0.487767	1.37332	1.33231	-0.0467111	0.531101	-0.81259	-0.25525	-0.130646	0.557673	-0.40641	-2.88967	-2.08377	-0.72017	-0.445507	0.345065	0.315578	-0.0935658	0.395107	-1.11902	1.44997	-2.55159	3.16178	-1.45668	0.793746
b0018	mokC regulatory peptide whose translation enables hokC (gef) expression	1.56114	0.398832	-2.3384	LQ	-3.23146	LQ	-2.36366	LQ	-3.25846	-3.44936	-1.95055	-0.559907	-2.86691	-2.53003	LQ	-1.34887	-1.4202	LQ	-1.76127	-1.35257	-1.01642	LQ	-2.9313	LQ	-2.58469	-3.18447	LQ	-3.07454	-1.46984	-2.57084	-2.10626	LQ	-0.474205	-3.01953	-1.81157	-3.53325	-4.87699	-2.146	-2.66967	-2.22702	-4.63089	-2.76399	-3.6005	-4.41791
b0019	nhaA NhaA sodium/proton transporter	0.174843	0.294385	-9.21388	-4.80231	-7.35795	-4.14384	-9.60834	-5.4082	-1.99993	-3.78542	-3.31507	-5.57193	-7.14876	-1.06318	-0.535019	-6.66033	-2.16244	-2.37974	-5.76085	-9.34894	-8.90721	-2.98216	-4.03186	-1.22791	-5.65097	-1.40182	-1.94201	-5.03633	3.88995	-4.99418	-7.2461	-7.33142	-4.1142	-6.9425	-9.66405	-2.01997	-7.54263	-4.03548	-8.12025	-1.91264	-10.1131	-6.35045	-6.29756	-6.80912
b0020	nhaR NhaR transcriptional activator	0.86109	0.499467	-4.28937	-2.63567	-1.99776	-1.26235	-6.21878	-2.85085	-2.28167	-0.649667	-0.941692	-2.67794	-0.345764	-1.04635	-1.28925	-0.183725	-1.78391	-1.97788	-3.06285	-6.21114	-1.35576	-0.528598	-1.80938	-0.839084	-3.39836	-0.181214	-0.434453	-0.841057	-3.46668	-1.84873	-5.96799	-5.25233	-1.01202	-2.5401	-2.38531	-0.340856	-5.20309	0.380245	0.748343	-0.0560256	-5.52442	-2.06572	-0.0826377	-0.667926
b0021	insB-1 IS1 protein InsB	-0.182818	0.531991	-0.238522	1.68627	1.28583	1.89047	0.0697057	2.39289	-0.493227	1.28096	1.44563	3.293	1.85897	3.41058	3.94031	1.49085	3.29143	3.75816	1.6193	3.96965	1.75571	2.77147	2.44802	1.80166	2.4452	1.99326	2.62991	2.38203	1.07695	1.12732	3.23179	3.29067	1.38941	1.71994	2.2072	2.43808	3.85091	0.38151	1.78427	2.11238	2.43281	1.35243	2.90351	0.597464
b0022	insA-1 IS1 protein InsA	0.12089	0.344723	-1.12186	-1.28359	-0.538788	1.0531	-0.816637	LQ	-0.176223	-1.0788	-0.088466	1.20271	-0.798599	1.55555	1.19129	-0.594922	-1.22286	LQ	-1.50713	2.00658	-1.02082	-0.086998	1.76608	-0.196692	-1.1299	0.450602	0.165094	0.0840432	3.8489	2.22808	-2.88052	-2.52087	-0.484047	-1.55993	1.02098	1.15702	1.69632	2.41804	0.609239	1.59837	-1.4372	1.71317	0.449015	1.96502
b0023	rpsT 30S ribosomal subunit protein S20	-1.58775	0.722998	1.67418	LQ	2.22288	1.61967	1.02352	1.68616	2.13743	2.47499	1.73497	2.38905	1.31283	1.96691	2.07525	0.906215	1.35526	1.26812	1.99916	1.21273	0.477179	1.21928	2.60834	1.359	1.97107	1.85011	1.88449	0.388367	2.16886	2.40409	0.725431	LQ	0.87842	1.66891	0.521421	1.60283	1.02658	2.63315	1.33641	2.12861	0.831633	0.925236	1.40327	0.866723
b0025	ribF bifunctional riboflavin kinase / FMN adenylyltransferase	-3.02343	0.659146	2.01891	4.57686	3.6042	3.56982	3.95161	3.62026	4.16759	4.80069	2.88611	2.96489	2.79691	3.42369	3.17243	2.03154	1.65515	1.64689	2.13105	0.585533	-0.235324	0.286757	2.15623	0.200036	3.26896	1.35905	1.22781	1.28676	2.7747	3.88221	1.00104	0.266816	1.04149	1.02096	0.37069	1.04274	0.167441	3.32043	0.510005	2.16044	0.605237	0.397664	3.4596	0.549871
b0026	ileS isoleucyl-tRNA synthetase	-3.39355	0.790892	0.537776	2.4677	0.510039	2.76041	0.849946	2.32383	-0.207278	3.28219	0.82585	3.88108	0.652544	2.97164	2.95149	0.625344	2.80395	2.57286	3.73688	2.38398	-0.368287	2.65685	3.491	2.36642	3.57803	2.75273	2.76851	-0.0133648	3.79416	3.90831	2.19809	2.03145	0.412425	2.7287	-0.878489	2.68443	2.31338	4.09897	2.2487	3.45404	2.26282	0.454655	2.60246	0.754529
b0027	lspA prolipoprotein signal peptidase II	-2.35429	0.544944	1.65844	0.0789535	0.29526	2.51639	1.32534	0.395746	0.623543	1.51987	0.932557	1.7834	0.996196	1.44575	0.909015	0.87055	-0.0831535	-0.249285	1.49193	-0.594914	0.144411	-0.743604	1.66239	-0.177557	1.45423	0.018858	-0.45678	2.78312	1.9992	2.33476	-0.900822	-0.797294	-1.85668	0.474944	-1.65485	0.157096	-0.948198	2.39238	0.0118944	1.44354	-0.152203	0.779002	-0.137649	1.26512
b0028	fkpB peptidylprolyl isomerase	-0.410735	1.34831	0.856817	-1.82967	0.961253	0.539936	-0.360367	-1.77285	0.382472	-0.881633	-1.4383	-1.08738	-0.988357	-0.727056	-0.845444	0.0378098	-1.79256	-1.95434	-1.29561	-1.98283	-0.0392759	-1.83476	-1.3955	-1.0359	-1.31761	-1.3035	-1.14602	-1.06976	0.181375	-0.636232	-2.14284	-1.87734	-1.50539	-1.85847	-1.72862	-0.221118	-2.06187	-0.362976	-1.76496	-1.3135	-2.21165	-0.647069	-1.58441	-0.505351
b0029	ispH 1-hydroxy-2-methyl-2-(E)-butenyl 4-diphosphate reductase	-1.15415	0.374069	-0.819201	-2.19245	-0.22402	0.0767701	-2.00852	-1.90725	-0.589747	-0.227482	0.406321	-0.453986	-1.37712	-1.01338	-1.07108	-1.27264	-1.44026	-2.23934	0.369125	-2.8888	-2.01345	-2.17854	0.657194	0.0662002	-0.767686	-1.14764	-1.19349	-0.133677	0.37893	0.120812	-1.86783	-2.84577	-1.14571	-2.57312	-3.03036	-0.484395	-2.97666	1.80096	0.610287	2.85162	-2.9822	1.29519	0.483148	1.22407
b0030	rihC ribonucleoside hydrolase 3	0.867286	0.783587	-0.335981	-6.11979	-2.04147	-1.66839	-2.1932	-2.02725	-3.58327	-0.981445	-0.716241	-4.97884	-1.44828	-2.98793	-3.28753	-1.41619	-1.73555	-2.40926	-3.83488	-0.99867	-2.63043	-2.64086	-0.957378	-0.928599	-3.15578	-1.8373	-2.16453	-1.6842	0.0806499	-0.198666	0.453895	-0.0224739	-1.30647	-6.12528	-0.454338	-0.64955	-0.314553	0.168074	-0.813361	-3.05458	-6.29113	-0.520417	-1.15701	-0.186258
b0031	dapB dihydrodipicolinate reductase	-2.40104	0.515192	-0.335857	-2.21947	0.737575	2.20466	-0.316246	1.44836	0.00590059	2.29508	3.08808	0.497056	0.715154	-0.161214	-0.199678	1.59612	-0.544077	0.337888	0.25072	-1.1517	0.0778208	-1.51559	0.922703	-0.509544	0.359684	0.0467833	0.679884	0.207213	1.58588	1.46219	-1.33687	-0.76157	-0.559293	-0.781447	-1.39267	0.330747	-1.19191	1.69281	-1.34331	0.333837	-1.79136	-0.270272	-0.282905	0.380481
b0032	carA carbamoyl phosphate synthetase	-0.306497	0.421599	-7.14432	-4.82695	-2.62835	-2.45298	0.687894	-5.91095	-3.47324	-4.04334	-3.51298	-4.05332	-4.83834	-5.20729	-4.61017	-6.88926	-5.58959	-5.95657	-4.39431	-6.98803	-7.98574	-7.62987	-4.81984	-7.02867	-2.30798	-3.26075	-3.17371	-7.36611	-4.47344	-4.02077	-7.44984	-7.15639	-7.0234	-6.46766	-8.41988	-7.35741	-7.8318	-3.47078	-7.80597	-4.81055	-7.52537	-6.21827	-6.13921	-3.93401
b0033	carB carbamoyl phosphate synthetase	0.00975702	0.243537	-4.2952	-0.894291	-4.00298	-3.18787	-6.41989	-4.07949	LQ	-3.13079	-4.43223	-3.1612	-8.55411	-4.72636	-4.21542	-5.68413	-4.24008	-3.61804	-4.74956	-6.70031	-3.58813	-7.74071	-4.08287	-5.58638	-2.51475	-4.59507	-3.8172	-5.90375	-2.99614	-3.80076	-1.53327	-0.452726	-5.33147	-3.62361	-4.41446	-6.26912	-6.60198	-2.11232	-5.65255	-4.03744	-5.79125	-9.19751	-2.43197	-7.71573
b0034	caiF CaiF transcriptional activator	2.94181	0.664931	-1.55282	-3.65456	-2.0094	-3.20611	-1.42628	-3.12928	-2.17441	-3.87636	-1.08312	-2.22847	-1.45718	-2.5465	-3.11778	-1.77577	-1.12298	-1.8877	-3.40462	-4.56575	-0.868556	-2.96145	-2.06866	-3.58883	-2.23204	-2.03903	-2.66008	-1.98974	-2.45178	-3.29232	-2.55179	LQ	-1.2813	-2.80354	-1.11049	-2.62549	-2.98406	-2.84616	-3.09818	-2.61836	-4.00908	-1.00023	-2.27679	-1.91394
b0035	caiE caiE protein	1.06322	0.52911	0.521583	-2.1603	-0.580177	-0.592582	-3.88926	-0.982672	-2.28624	-1.48325	0.36771	0.378654	-0.0040753	-0.11285	0.186099	0.859676	-1.64027	-1.16499	-1.16819	-1.9215	-2.98824	-0.927501	0.0800011	-0.137113	1.18186	-0.332001	-0.0485113	0.279457	0.350935	-0.364246	-3.55632	-2.27703	-0.429073	-0.311169	0.673443	-0.768729	-0.565285	-0.328377	0.377918	1.54334	-4.46545	0.79289	-2.10587	-2.08736
b0036	caiD crotonobetainyl-CoA hydratase / carnitine racemase	1.36471	0.438187	-3.3079	-2.41761	-3.27148	-0.815818	-4.77588	-1.14331	-3.98639	-1.84701	-0.957952	-1.8183	-0.564621	-2.47448	-2.66027	-1.29788	-1.81254	-2.26164	-0.0999194	-5.02224	-2.09876	-2.57916	-0.608236	-3.09999	-2.35807	-2.1138	-1.81813	-2.02064	-1.97827	-5.0178	-0.599927	-0.860707	-3.39401	-2.78565	-1.45471	-0.8613	-0.533126	-2.29388	-0.555027	-1.39444	-0.809619	1.0678	-2.79465	-1.02687
b0038	caiB CaiB monomer	-0.482361	0.870931	1.73809	0.616909	1.48031	1.85344	4.05026	0.7685	1.25086	0.926292	0.84181	0.762508	0.457667	0.998893	1.17265	1.15088	-0.360474	-0.118458	1.64266	-0.605529	0.778473	-0.247204	1.10994	0.048273	0.813724	0.461541	0.543941	0.16049	2.1755	0.574739	-2.61356	-2.33776	0.306107	0.867668	-0.245796	0.954137	0.0850318	-0.0487822	0.866668	0.645463	-2.1358	1.79359	-0.572781	1.18742
b0039	caiA crotonobetaine reductase	0.664169	0.363606	2.15971	-2.64155	0.721363	-0.368249	-1.76925	-0.386601	-1.37989	3.36192	-0.297943	-0.0572683	-0.505046	-0.203708	-0.213488	0.151044	-2.61912	-2.91541	0.0195653	0.786808	2.96451	-2.02046	-0.239343	-2.40651	1.12345	-1.30397	-1.31256	-0.230203	-0.164816	-1.03534	-5.24934	-5.05873	-0.23897	1.30567	0.630939	-1.4866	-5.25295	-1.58366	-5.90387	-1.41842	-0.09443	1.81286	-1.33998	-2.96718
b0040	caiT CaiT carnitine BCCT transporter	0.435323	0.566526	-1.3178	-1.27557	0.190353	-2.26048	-1.10156	-1.85183	-2.09877	0.122708	0.547396	-3.09206	-1.73583	0.128717	0.0155577	-0.94941	0.936458	1.01987	-2.13121	-2.98491	-0.973109	0.00530924	-2.11965	0.564647	-0.410329	1.56431	1.6154	-0.257892	-1.46283	-0.422435	3.11605	3.27689	1.65639	0.936186	2.87201	0.0968042	-0.95908	-1.99913	1.91443	-0.4301	1.46481	-1.41975	2.31834	-3.41654
b0041	fixA probable flavoprotein subunit required for anaerobic carnitine metabolism	0.971552	0.416969	0.669903	0.509669	-0.845983	-1.59679	-6.46135	-4.43777	-2.81805	-0.942614	0.281445	-0.0511438	-0.51099	-0.681273	-1.52151	-1.59403	-5.45265	-5.17782	-2.76775	-9.20097	-3.26934	-1.57411	-1.27212	-0.0910994	-0.0330688	-0.923234	-0.948535	-0.889606	0.0308094	0.611318	0.261181	-0.224181	0.653204	2.17854	0.404611	-1.9971	-3.02379	-2.00411	-1.85325	0.0364638	-1.34347	0.439228	1.92239	1.42277
b0042	fixB probable flavoprotein subunit required for anaerobic carnitine metabolism	-0.979426	1.05165	1.00306	-0.231015	0.996038	0.689854	-0.802118	-0.153622	0.417048	1.95128	0.822621	1.41002	0.807552	0.91119	0.761032	0.769884	0.748686	0.725178	-0.0321323	0.495327	0.571538	-0.0339593	1.36753	0.439105	0.754676	0.574146	0.58312	0.515088	1.07272	0.564944	-1.41736	-0.980064	0.475418	0.7092	0.33196	0.162625	1.03599	1.36744	-0.18621	1.01456	-1.45982	0.916685	-0.448851	0.642567
b0043	fixC flavoprotein (electron transport), possibly involved in anaerobic carnitine metabolism	-1.19481	0.929849	-0.241424	-0.497945	1.12655	1.40107	-1.36892	0.0526407	1.69511	2.17791	1.02728	-1.24217	0.756081	1.0422	1.12709	1.0007	0.461952	0.379842	-2.04076	-0.259374	1.53943	-0.428233	0.663435	0.07111	0.783585	0.0310965	0.264693	0.439359	0.242032	-0.376529	0.351326	-0.0665596	0.830724	1.47012	0.529265	0.74229	1.88864	-0.369596	0.595796	-0.201291	-2.47043	1.48407	1.30247	-1.45763
b0044	fixX putative ferredoxin possibly involved in anaerobic carnitine metabolism	-1.44046	1.09917	0.945793	1.84103	1.19192	0.963141	-0.179794	0.598147	0.612118	1.42989	1.44613	0.452992	1.90026	1.22334	1.37062	0.86918	-0.333971	0.330199	0.190301	-0.240403	-0.0448325	0.420864	1.96658	0.223621	1.77997	0.553827	0.974949	1.32025	0.79077	2.14767	-0.895999	-0.548298	0.981088	0.650887	-0.559849	0.737493	3.10307	1.28376	0.530459	0.36578	-0.339556	-0.141701	0.0658928	-0.211716
b0045	yaaU YaaU	0.131452	0.365123	2.47196	1.91554	0.486189	1.93607	5.44911	-0.289381	3.04026	1.20806	-0.374522	-0.879692	1.11631	1.69512	2.12357	0.0252377	3.50684	3.7909	-1.90112	-0.766921	3.33857	0.408797	2.0734	-0.82094	0.858433	1.97605	2.15178	0.952146	2.10931	3.64434	-8.62867	-9.40173	0.192162	-0.166982	0.577856	0.130647	0.91726	0.695717	2.17631	2.87589	-9.40916	2.62838	-1.53445	3.77339
b0047	kefC KefC potassium CPA2 transporter	-0.0784407	0.389252	1.82055	2.34379	1.15231	0.787171	-2.7477	-0.435263	0.416224	2.25149	1.77351	-1.3962	0.910917	2.20262	2.99521	1.58847	3.2875	4.15768	1.85053	-5.60015	1.88353	1.0662	2.1575	-0.368626	3.22569	0.706643	0.847774	0.802428	3.96277	-0.386254	-1.67342	-1.58219	0.622674	0.689994	1.77741	-1.53126	-0.0328461	1.24337	-0.329659	2.41123	0.284616	1.36667	-2.0778	2.02635
b0048	folA dihydrofolate reductase	-2.09759	0.668832	0.70548	1.23209	0.450383	3.12135	-0.0305129	0.94939	2.34212	1.79956	1.21764	0.957435	2.9386	2.90728	3.00185	0.283554	2.14291	2.47767	0.991967	-0.802035	-0.582121	1.47775	2.34966	0.822166	1.42197	1.25341	1.08575	2.89316	1.20174	1.55211	0.410719	1.13664	1.70326	0.456066	2.40839	1.734	-0.437864	2.1775	-0.39898	2.97367	-0.449833	0.754091	3.43601	2.91336
b0049	apaH diadenosine tetraphosphatase	-0.59304	0.46531	1.20834	-1.86	-3.29747	-0.0695286	-0.49694	0.508313	-0.887007	-3.20676	-0.0914714	-2.7221	-1.21812	-2.33272	-2.09601	-0.108475	-3.95919	-3.83475	-2.88653	-5.09895	-3.29787	-4.57293	-1.28456	-2.67159	-0.644118	-1.07592	-0.994253	-1.11062	-2.44295	2.38734	3.68765	4.60294	-3.34438	2.14669	-3.01807	-1.94692	-5.10041	-0.942617	-5.38695	-3.15616	-4.95339	-3.25469	-1.81878	-2.65867
b0050	apaG hypothetical protein	1.03424	0.905542	-2.60396	-0.365104	-1.97312	-2.10723	0.0166996	-1.21096	-2.04278	-2.59466	-1.15276	-2.34763	-1.18156	-1.58088	-1.35145	-2.13606	-3.66369	-3.0925	-2.55259	-3.20633	-2.30743	-3.41371	-0.925653	-3.52002	-0.0499321	-0.132539	-0.33262	-1.50383	-1.99176	-0.509789	2.45199	2.28704	-1.45718	0.499473	-0.658144	-1.9487	-3.13636	-1.70072	-3.68482	-2.38651	-2.74485	-2.89238	0.300082	-1.53886
b0051	ksgA S-adenosylmethionine-6-N',N'-adenosyl (rRNA) dimethyltransferase	-0.466509	0.361913	-3.29821	-2.13661	-4.36623	-2.6101	7.5813	3.94883	-4.98639	-3.61778	-1.83592	-3.6539	1.88444	2.08013	2.05405	3.17657	-2.01191	-3.92442	-0.0412279	-0.888143	0.765871	-0.435258	0.236332	-6.39814	2.63175	-0.406374	-0.144932	-1.93755	-3.16347	-0.594212	-3.76073	-1.69072	-2.43074	-1.88487	-1.47522	-3.51083	4.01554	0.647128	-4.68289	-3.62837	2.91368	-1.66582	-1.96393	-0.39581
b0052	pdxA 4-hydroxy-L-threonine phosphate dehydrogenase, NAD-dependent	-1.19461	0.4666	-3.61268	-2.29752	-4.07415	-2.5202	1.03063	0.561366	-4.05902	-0.685615	-1.62105	-1.58125	-0.163908	-0.343313	-0.54389	-2.76974	-3.86075	-3.39302	-1.35876	-3.99671	-2.39314	-1.64965	0.0138334	-4.52702	-0.826206	-3.18535	-2.7068	-3.01999	0.474592	-1.36447	-4.13479	-4.21541	-1.85051	0.161277	-4.59744	-4.04118	-2.69753	0.236283	1.21273	-2.63074	-3.72334	-3.68399	-3.71155	0.530441
b0053	surA peptidyl-prolyl cis-trans isomerase (PPIase)	-0.641236	0.506941	-4.7117	-5.68313	-2.38431	-4.3776	-3.83414	-4.93253	-4.05207	-1.71076	-3.02822	-2.79269	-3.33945	-4.0946	-4.01135	-4.60286	-6.08967	-5.98606	-3.88117	-6.30564	-5.26327	-5.73806	-3.73865	-6.02945	-4.10648	-4.91869	-5.28507	-4.44158	-3.63268	-3.91279	-6.45303	-6.79808	-4.32535	-5.89148	-4.53383	-3.82086	-6.69351	-1.80956	-6.17804	-4.97271	-6.34172	-4.62783	-4.63648	-3.84664
b0054	imp exported protein required for envelope biosynthesis and integrity	-2.68059	0.59012	0.935057	2.84942	0.923403	3.19578	1.76542	3.43263	-0.0886785	4.11496	-0.177326	2.47233	1.53977	2.87499	3.50824	0.283432	3.99825	4.46845	2.75466	0.529057	0.986708	0.454205	2.34472	2.34638	2.17645	2.26376	2.30987	1.76778	2.2064	2.46738	1.0798	0.261782	-0.159129	0.919226	4.37772	2.80313	1.21927	3.42249	1.89117	2.88607	1.27511	-0.279272	1.44668	2.16517
b0055	djlA chaperone with DnaK	1.3432	0.514223	-2.13888	-0.705629	-0.0239085	-2.35029	-2.90354	-2.15737	-3.35666	-0.824356	-0.0161337	1.34219	-0.777044	-0.743588	-0.634026	-0.360675	-3.48734	-3.04763	-2.32266	-4.23518	-1.70944	-1.41412	-0.154847	0.168483	0.939906	-0.187072	0.253481	0.0838782	-2.60136	-0.523598	-5.73678	-5.17796	1.37443	0.478591	1.90709	-0.446939	-3.27512	0.146736	0.998489	0.270833	-0.786494	-0.802678	-2.21763	-1.50131
b0056	yabP predicted protein	4.34209	0.452213	-1.8049	-4.38209	-3.73763	-3.06687	-1.90516	-3.1487	-3.10558	-6.05073	-2.99337	-3.94083	-2.91185	-2.67414	-2.91087	-1.29135	-3.52263	-3.40275	-4.21611	-2.11911	-1.32858	-3.57018	-2.84551	-3.48906	-4.17646	-2.53793	-2.11847	-2.66751	-2.53017	-2.59812	-4.84104	-3.86797	-2.35382	-4.83471	-3.55319	-3.02469	-2.21517	-3.80429	-2.2273	-3.59374	-3.37845	-2.12161	-3.09009	-0.828924
b0057	yabQ predicted protein	3.48016	0.708385	-4.93285	-5.22962	-4.71118	-4.80795	-4.84672	LQ	-3.69721	-4.39154	-2.24626	-4.00962	-2.04847	-5.13359	-4.89985	-4.35122	-5.25828	-5.45701	-4.24942	-5.70741	-4.47279	-5.79086	-4.38601	-5.35891	-4.4842	-5.20214	-4.8258	LQ	-3.8552	-4.19172	-6.26269	-5.81212	LQ	-5.24534	-4.98401	-5.54047	-5.90216	-3.6865	-6.03833	-4.51494	-6.15566	-4.35313	-5.72353	-3.89576
b0058	rluA 23S rRNA and tRNA pseudouridine synthase	0.846942	0.391989	-2.63385	0.203259	-0.648548	0.0029381	-0.0190834	-2.73657	1.47772	1.59587	-1.12154	-4.3367	0.415162	0.587675	0.506672	0.484817	-1.57563	-0.943792	-2.03738	-3.95446	-1.9741	-0.619647	-0.0807638	1.25806	0.507443	-2.20516	-1.59823	-2.59374	-2.1642	-2.47311	-5.91614	-4.38063	-2.85789	-2.59977	0.491947	-0.84674	-2.67559	0.987254	-2.75466	-0.583479	-4.52526	0.477971	-2.84162	-1.58763
b0059	hepA RNA Polymerase (RNAP)-binding ATPase and RNAP recycling factor	0.566889	0.430915	-0.942362	-2.41715	-0.86244	-1.69652	-0.945587	-1.93004	-0.730496	0.38446	-3.17659	-3.73636	0.631597	0.749828	0.878988	3.05432	1.87866	1.83508	0.576289	-3.1491	-0.652182	-1.63158	0.10311	-1.13316	0.942675	0.0852252	0.203628	-5.22188	-3.74497	-1.49678	-4.57777	-4.19872	-2.49159	-1.62518	-0.386043	-0.745574	0.774985	0.307537	-0.7102	0.989943	-2.90115	0.568929	-6.74762	0.307862
b0060	polB DNA polymerase II	0.453446	0.384048	-0.867278	-0.591743	-0.557573	-1.347	-0.396858	-2.72514	-1.44607	-0.0857774	-0.93843	-0.21096	-1.14319	-1.04603	-0.660998	-1.04393	-3.79322	-3.59607	0.414288	-2.72512	0.0651013	-3.90868	-0.287716	-1.16453	-1.17647	-1.95146	-1.97092	-2.32606	-2.90285	-0.29132	-6.43602	-7.10177	-2.94285	-1.72804	0.320124	-3.4309	0.023175	-0.987776	-4.34429	0.207873	-6.25906	0.253543	-2.49604	-0.416817
b0061	araD L-ribulose-phosphate 4-epimerase monomer	-1.51379	0.675305	2.62793	0.973422	1.3216	2.34137	-0.470079	LQ	2.45596	4.24518	2.20994	-0.401451	2.17118	1.83012	1.78672	2.07715	2.22496	2.03627	4.65559	-1.46583	2.9866	1.20206	2.74642	-0.340268	0.0711731	1.15211	1.36918	1.24113	-0.521939	1.79029	-0.7113	-1.05641	0.743251	0.543258	0.367557	2.62225	-1.98404	2.17834	4.33843	2.68603	-1.2305	2.82014	-1.07395	1.81498
b0063	araB L-ribulokinase monomer	-0.45237	0.439779	3.95527	-1.31683	1.50897	1.26577	-3.00786	-1.66557	0.0504867	5.47617	1.96196	2.92876	2.19187	2.52135	2.34909	0.372956	-2.61897	-2.23954	2.95773	-4.78281	0.532536	-2.2414	1.80944	-0.876316	1.68514	-1.53893	-1.06177	-1.42634	0.177971	1.39547	2.94962	3.60885	-0.075954	3.01078	0.022957	0.373845	-2.91252	1.45891	0.166087	0.977292	1.26843	3.4041	-2.71568	2.04169
b0064	araC AraC-Arabinose transcriptional activator	-1.34606	0.63139	0.886994	LQ	1.40824	3.19664	1.05447	-0.130345	1.92156	3.79551	2.09582	2.50993	2.35882	3.85775	4.05795	2.12296	-0.378103	LQ	0.675965	-0.961133	-2.02736	1.14844	2.18099	4.0836	1.53951	1.58795	2.71346	1.11329	0.448509	2.49423	-0.772303	0.0500259	0.761278	0.335443	1.28566	2.47299	-2.14416	0.680843	2.10394	2.66411	-2.94047	3.4502	-0.170124	4.85308
b0065	yabI conserved inner membrane protein	0.246703	0.900074	-0.00325288	-2.06047	-0.800731	-0.628979	-3.24242	-2.97489	-1.30333	1.09876	0.0796143	-0.811902	1.12664	1.21938	1.0422	0.791831	-2.24174	-2.18729	0.0232153	-1.81766	-1.71879	-1.24847	-0.0875371	-2.50563	0.986625	0.42611	0.168762	-0.365997	-2.31638	-0.583372	-2.42839	-2.29869	-1.49221	-2.63485	-2.03431	0.119827	-0.881199	-1.78707	-2.77964	-0.714026	-2.62373	-1.03421	-2.28002	0.698642
b0066	thiQ SfuC	-0.0609778	0.225886	-1.82132	-4.23806	1.15563	4.33093	-2.70771	-0.547328	3.65089	6.30159	0.967949	-3.28919	0.789524	3.01362	4.91231	-1.97643	-0.221898	-0.0456576	1.87108	-5.87043	-7.6502	-2.87706	2.69975	-6.81196	2.60233	-0.412694	0.745699	-2.29086	-2.56061	-3.2753	-5.27451	-5.96638	-2.26724	-2.37547	-7.49567	0.0484423	-12.2173	2.34041	5.77	1.44547	-11.3883	0.57753	-8.68674	-0.51171
b0067	thiP SfuB	-0.459928	0.443987	1.88155	-0.655349	0.511061	2.6065	-0.103829	-1.44012	-0.926803	2.7356	0.842951	1.41341	1.78569	1.70015	1.83548	-0.114179	-0.963676	-1.08262	1.37178	-3.46289	-1.59113	-1.77389	2.22626	-0.937885	1.25323	-0.407585	-0.275312	0.501801	1.30322	0.641806	0.384825	1.07911	-0.169905	-1.3647	-1.1134	0.468068	-1.77648	3.04718	-2.86886	2.38328	-3.91239	2.09782	-2.60537	-0.10502
b0068	tbpA SfuA	-0.456103	0.457659	1.57437	1.34361	1.73722	2.9447	-3.06044	-0.21994	1.53478	2.55405	0.499853	1.66948	1.79349	0.152167	0.0529512	1.69066	1.63358	1.71189	-1.94085	1.2153	4.87131	-4.4006	2.43732	-0.599042	1.94705	1.3967	1.0968	1.60801	-1.93274	2.06892	-2.94816	-2.77966	-0.602101	2.54117	0.559989	1.31143	1.55735	2.52799	-1.56103	1.7382	1.17778	1.66412	-1.09604	0.801522
b0069	sgrR SgrR transcriptional dual regulator	0.254319	0.257754	1.90089	-2.11796	0.321438	0.611729	-3.23012	-0.557228	2.50211	0.997208	2.19351	-5.47383	-0.175817	-2.58258	-2.60844	-1.52781	0.543128	0.342158	-5.17729	0.487536	2.98695	-2.64644	1.84726	-0.191072	5.79371	6.146	6.09089	-0.911798	2.35237	0.775641	-5.07158	-5.50935	-2.67127	1.32662	-1.52446	-0.526793	-10.0306	0.741387	-0.514179	-0.151301	-1.91714	1.46514	-6.3994	1.0037
b0070	setA YabM MFS transporter	0.345103	0.456393	-0.0135711	3.47703	2.40471	1.8474	-4.51555	1.95992	1.4489	1.06311	2.40964	2.65904	1.49611	0.321171	0.789281	1.82601	2.02755	1.90812	2.70981	1.60274	-2.6996	0.347064	2.17963	3.85482	2.29232	1.65481	1.45626	1.3457	1.55177	0.531016	0.854361	0.200256	0.813307	2.65669	2.56619	2.31824	-0.769691	-1.81458	3.70702	2.27507	3.75011	0.350626	0.0455971	3.36336
b0071	leuD isopropylmalate isomerase	0.0327449	0.660106	0.966687	-0.532745	0.397276	0.663307	-2.89323	-1.37496	1.21696	1.02848	1.14261	2.13113	0.397524	0.904841	0.873266	0.355341	-2.89001	-2.45491	-0.903742	-0.599655	-0.607785	-1.17072	1.00777	-0.788643	-0.801982	0.915345	-0.260392	0.0196517	0.50122	1.31507	-1.55169	-1.23647	-0.0403392	-0.181434	1.23538	0.0547801	-0.883649	0.446891	0.111596	0.884181	-0.264971	1.71871	-1.19096	-0.529625
b0072	leuC isopropylmalate isomerase	-0.540238	0.65949	1.17392	1.0667	0.75991	0.982029	-1.19637	-0.601754	1.66939	2.48387	0.815686	-0.00452246	0.935671	0.427743	0.604443	0.470679	-0.881772	-0.452819	-0.914243	-1.91074	-1.6796	-1.20142	1.63886	1.82651	-0.437377	-0.368828	-0.328642	-0.0342431	-0.607244	2.27702	-1.11112	-0.835768	-1.74927	1.52757	0.764322	1.88292	-0.828508	LQ	0.341061	0.549107	-2.38047	0.661515	-1.66807	0.367393
b0073	leuB 3-isopropylmalate dehydrogenase	-0.663191	0.576772	2.23204	2.76865	0.536557	1.17119	-2.08768	-0.301121	1.40044	1.83381	0.624396	1.36131	1.92195	1.3652	1.39109	1.19237	-2.1482	-1.5426	0.072966	0.484492	-0.460337	2.71936	1.29186	0.864337	2.10921	-1.01719	-0.535022	0.408582	-0.196823	0.194635	-0.0894999	0.168902	-0.650764	0.197124	1.0228	-0.0628215	0.439633	1.25713	1.99357	1.82931	-1.70526	3.19455	-0.657357	0.76615
b0075	leuL leu operon leader peptide	0.121669	0.324263	0.0414966	6.38606	-0.466843	LQ	-0.718568	6.8732	-0.173428	3.98338	2.81849	4.14401	1.06191	LQ	LQ	-0.439635	LQ	LQ	4.09638	9.88566	0.521157	11.1756	6.61777	11.1491	9.77965	6.04104	6.41371	-1.03402	9.45022	4.2357	7.51673	6.75097	-0.323482	9.26297	-0.520559	LQ	2.66138	6.40227	9.47577	LQ	8.31559	0.492689	LQ	1.02572
b0076	leuO LeuO transcriptional activator	1.77032	0.460718	0.485944	0.854873	0.872859	-2.02343	-0.597703	1.13806	-1.58546	-2.10269	1.45863	1.13672	0.410145	0.417239	0.0964335	0.501215	0.320739	0.458878	0.718664	0.968334	-1.16243	2.2797	-1.05649	1.97866	0.532011	2.24693	2.10838	1.4398	-0.323361	-0.246411	3.37887	3.85186	3.81959	2.32179	3.01002	1.66122	0.673391	-0.405533	2.08764	0.68686	0.601679	-2.10632	4.23375	-1.0591
b0077	ilvI acetolactate synthase / acetohydroxybutanoate synthase	0.61327	0.321806	1.15435	1.5688	-0.294742	0.223355	-0.549255	0.417042	-0.237278	0.257506	0.0539727	-2.59959	0.99997	0.0303894	0.387523	0.192006	-2.9649	-1.55015	0.645613	-3.01169	-2.21262	1.17388	1.35692	0.290063	-0.886331	-0.899787	-0.0148699	1.82699	0.695846	-0.803185	-0.286573	1.52178	-1.07138	-2.12032	1.6268	1.05441	-4.77422	-1.52948	-0.410537	-0.399746	0.582773	2.54167	-0.857928	-0.827316
b0078	ilvH acetolactate synthase / acetohydroxybutanoate synthase	0.576276	1.01746	-0.39939	LQ	0.278972	LQ	-0.280047	LQ	0.225076	0.459534	0.821816	-0.197988	0.163517	0.464586	0.395866	0.247997	0.393314	0.315958	0.29461	0.421301	1.7647	0.535316	0.199022	-0.880486	0.872362	0.365914	0.223617	0.336789	0.727346	-0.786276	1.19143	1.27731	1.18772	0.779258	1.09365	-0.372729	-0.88458	-0.550599	-0.250769	0.074961	0.619525	-0.391442	0.231597	-1.08709
b0080	fruR FruR transcriptional dual regulator	0.268316	0.335297	-2.86249	-4.60323	-0.419699	-3.11906	-2.12335	-2.74314	-2.22908	-3.70511	1.82225	3.71826	0.126055	1.75742	1.05338	2.30921	0.233583	0.446991	4.67443	2.28831	2.89504	2.45744	1.56091	-1.16474	-0.796987	0.455682	0.33315	2.48464	4.35959	3.75916	3.22481	3.04704	1.52523	0.959148	2.98992	0.744124	-3.17575	-0.805613	-0.428465	1.54702	2.65576	-0.816731	-0.949958	2.64547
b0081	mraZ conserved protein	-0.727301	0.770893	-0.954518	-0.604875	-0.671806	-0.794616	-0.371077	-0.884972	-0.0584163	-0.745126	-0.125241	-0.535631	-0.824499	-0.842552	-0.629386	-0.827149	-0.738394	-0.338936	-1.133	-0.799739	0.63865	-1.73031	-1.02758	-0.909503	-0.666257	-0.376837	-0.0437265	-0.964289	-0.105169	-0.632097	-0.655626	-0.0160215	-0.215802	-1.26626	-1.50441	-0.788732	-1.22489	-0.547841	0.996019	-1.22693	-1.17726	-0.41903	-0.369218	-0.383915
b0082	mraW S-adenosyl-dependent methyltransferase	-2.66564	0.511524	1.53017	1.9926	-0.00470383	2.59375	0.951623	0.972914	0.360956	1.91681	1.77316	6.31444	0.439994	2.26858	1.71664	0.261943	2.86714	2.65753	3.22042	0.346845	-0.102091	0.591473	3.40691	0.107769	3.18688	1.8656	1.42819	0.165223	3.2747	3.51024	1.07698	0.79874	1.22338	1.34288	-1.19949	0.672172	0.351192	3.68759	0.457787	3.24027	0.797627	0.571402	2.10379	0.972874
b0083	ftsL essential cell division protein FtsL	-2.09291	0.491725	0.0141345	2.05873	-0.233792	1.87761	0.315815	1.09995	-0.546569	3.26919	1.77847	3.00144	0.402537	1.75883	2.68736	0.430291	1.39924	2.25829	2.6415	0.734973	0.315965	2.48879	1.93641	1.32208	2.25013	0.831604	1.90935	0.139801	2.74423	2.73152	0.130336	1.30548	-0.000204444	1.95753	-0.724141	1.20187	0.843535	3.07544	0.984617	1.9293	1.219	0.269699	1.47598	0.446792
b0084	ftsI essential cell division protein FtsI; penicillin-binding protein 3	-3.76684	0.695682	-0.565794	1.15514	0.35547	1.5038	-0.221707	2.03182	0.037798	1.77531	1.73088	1.5885	0.0917629	1.21244	1.69964	-0.00752057	0.773053	1.23938	1.54784	-0.0805411	5.22892	0.303993	1.68144	-0.292369	1.24877	2.34119	2.15834	2.5635	2.51435	1.66322	-0.317188	-0.0328015	-0.389031	0.30555	-0.7979	0.0240388	-0.236518	2.29233	-0.149367	1.22215	0.182809	2.25302	0.728392	3.24727
b0085	murE UDP-N-acetylmuramoylalanyl-D-glutamate 2,6-diaminopimelate ligase	-3.56279	0.653255	0.18997	0.952812	0.250497	0.864908	1.1955	2.36601	-0.336237	1.28978	1.59713	1.48989	0.978748	1.39174	1.67675	0.499238	0.727579	1.16733	1.26896	-0.221975	0.541239	-0.542358	2.37452	-0.696288	1.79328	1.18275	0.590183	0.667612	1.37606	1.85695	0.135955	-0.661935	-1.16209	0.375019	-1.16209	0.206004	-0.670856	1.97982	-0.595225	2.26941	-0.00563903	0.592035	3.56865	0.5157
b0086	murF D-alanyl-D-alanine-adding enzyme	-3.7334	0.850705	0.195395	0.889991	0.0852536	1.07366	0.69905	0.61665	-0.0195983	2.11431	0.846833	1.74252	1.12861	1.70393	1.42344	0.184995	3.08451	2.77336	1.44743	-0.0710573	0.182344	-0.135497	2.09745	-0.229523	1.98706	1.22393	0.179049	2.19877	1.51338	2.05139	0.87613	-0.137865	0.351331	0.698635	-0.691811	0.149574	-0.335944	1.91155	-0.0837484	2.14818	0.405911	0.0572272	1.23339	0.403253
b0088	murD UDP-N-acetylmuramoyl-L-alanine:D-glutamate ligase	-3.72763	0.676203	0.0867069	1.04637	1.86785	1.09624	0.748927	0.388754	-0.201399	1.50073	1.20922	2.43594	1.01809	2.22147	1.51192	0.88301	2.10693	1.5917	2.23161	-0.06924	0.146032	5.62824	2.88573	0.0699374	2.7745	1.60561	0.689573	-0.584153	2.3563	2.78377	0.97376	-0.23013	-0.591623	1.04035	-0.878869	0.354797	-0.217119	2.85917	-0.275618	2.82643	0.419175	0.591688	1.82986	0.528984
b0089	ftsW essential cell division protein FtsW	-3.76895	0.608439	-0.53392	1.89154	0.848971	1.65698	0.455072	0.821111	0.224943	2.15038	0.72935	2.3533	0.387435	2.70599	2.07368	-0.03325	1.91326	1.66722	2.31501	0.571676	-0.64505	1.09385	2.39202	0.832441	2.30799	1.72667	1.29181	-0.316664	2.25179	2.49199	0.353572	0.129761	0.12537	1.26916	0.598099	0.446901	0.0839782	2.87364	0.354904	1.88618	1.17313	-0.266311	0.57191	0.723358
b0090	murG N-acetylglucosaminyl transferase	-2.54205	1.11478	-0.444222	1.47953	-0.64323	0.127751	-0.0680872	-0.210715	-0.595708	-0.15172	-0.267508	0.387618	-0.172631	0.121151	-0.112405	-0.521562	0.776523	0.773722	0.122276	-1.04393	-0.566769	-0.925708	0.709453	0.952661	0.374347	0.0318028	-0.684964	-0.187499	0.25942	0.453769	-0.517776	-1.43343	-0.902033	-0.477071	-1.30818	-0.850402	-1.14438	0.628578	-1.19116	0.733799	-0.644327	-0.278528	-0.313409	-0.519952
b0091	murC UDP-N-acetylmuramate-alanine ligase	0.626669	0.272827	-1.19281	-7.48264	-1.72936	-10.9525	-0.725033	-12.5162	-2.16802	-12.9769	-0.250152	-18.0778	-0.686095	-9.39747	-13.5075	-0.597141	-18.1033	-11.0665	-14.547	-18.1382	-1.42014	-18.1382	-15.1671	-18.1382	-17.1985	-17.4177	-14.4805	-1.07584	-8.34358	-16.3206	-13.6779	-14.7858	-1.03531	-16.8653	-1.87413	-14.0021	-18.1382	-10.8515	-11.9615	-15.5935	-14.9693	-0.988286	-18.1382	-0.875226
b0092	ddlB D-alanine-D-alanine ligase B	-3.72656	0.593213	0.68055	3.62745	0.772784	1.80881	0.947161	2.19766	1.22952	3.47747	2.42093	2.81004	2.46897	2.49482	1.95758	0.82318	2.37539	0.9705	2.72844	0.782814	0.600632	0.854833	2.82277	0.634614	2.31541	1.99161	1.23699	2.70979	3.20926	2.91686	1.66635	-0.121385	1.12487	3.95028	2.02244	1.90308	0.178706	2.97506	1.06698	2.74602	0.796762	0.605327	LQ	1.65544
b0093	ftsQ essential cell division protein FtsQ	-3.36821	0.987538	-0.101461	0.933058	0.857053	1.13471	0.400787	0.722333	-0.0887351	1.32573	2.01479	1.58937	1.16516	1.22463	1.03056	0.424417	0.961292	0.700948	1.52897	0.317864	-0.250718	0.900387	1.56832	0.450683	1.44732	0.816624	0.631369	0.946292	1.56401	1.7154	0.364376	0.00460827	0.0521204	0.870325	0.743964	0.968044	0.37945	1.86699	0.453816	1.52678	0.805323	0.0853306	0.817235	0.86569
b0094	ftsA essential cell division protein FtsA	-3.39653	0.753026	-0.135878	1.3552	0.425061	1.49965	0.304071	0.926474	0.0186747	1.43232	1.06307	1.83872	1.06288	1.95083	1.32448	0.443289	1.34901	1.11334	1.89067	0.575883	-0.28686	1.85469	1.60309	0.664622	1.74893	1.8666	1.68235	1.32186	1.70287	1.95549	0.371617	0.260187	1.85511	1.07639	-0.473408	0.882892	0.414474	2.15844	2.04264	1.50056	0.846302	1.31342	0.740863	1.7025
b0095	ftsZ essential cell division protein FtsZ	-3.41933	0.802055	0.175337	1.27127	-0.181387	1.59272	-0.108577	0.931537	-0.0125438	1.40897	0.926494	1.59431	-0.00380716	1.44679	1.23394	-0.270987	0.967981	0.908518	1.66647	0.279611	-0.719167	0.644267	1.61147	0.647722	1.44846	0.596483	0.657192	0.71886	1.44971	1.95356	0.0711088	-0.0914637	-0.664411	0.672288	0.464282	0.449476	0.054591	2.28006	0.143611	1.14579	0.509903	-0.213129	0.83503	0.678006
b0096	lpxC UDP-3-O-acyl-N-acetylglucosamine deacetylase	-1.90953	1.09519	-0.502532	0.863983	-0.768638	-0.0156635	-1.10406	-0.497953	-0.365082	0.46983	-0.303702	0.312223	-0.82172	-0.426522	-0.798916	-0.886026	-0.814551	-0.764726	-0.357039	-1.18467	-1.41313	-0.566025	0.332704	-0.609506	-0.253369	-0.963325	-1.17085	-0.494394	-0.148052	0.665459	-1.19635	-1.58214	-1.15053	-0.952216	-1.38066	-0.31974	-1.49912	-0.0389034	-1.1826	0.0397372	-1.07681	-1.10534	LQ	0.204413
b0097	secM secretion monitor that regulates SecA translation (General Secretory Pathway)	-2.2967	0.936673	-0.158303	-0.196132	0.362872	0.295544	-0.0827381	-0.579025	0.597934	-0.184496	0.192509	3.51757	-0.253747	-0.490221	-0.277989	0.415985	-1.19182	-0.431539	-0.515768	-1.4948	-0.79928	-0.512338	-0.112966	-1.12357	-0.101567	-0.59928	-0.7256	0.0507923	-0.199832	0.27289	-1.37956	-1.69242	1.5016	-1.18381	-0.45562	-0.501611	-1.71259	0.142732	-1.29839	-0.145275	-1.30503	-0.572751	-0.737481	1.40857
b0098	secA Sec Protein Secretion Complex	-1.80102	0.45216	-1.08428	1.78241	-0.287474	0.255926	0.300661	0.706023	0.35214	1.28858	-1.21042	1.38511	-0.744022	0.854162	0.827324	-0.234028	2.1126	1.49511	0.948974	-0.857238	-2.2475	-0.319037	1.19159	0.288285	1.02895	-0.648052	-0.0659805	0.41949	1.37345	1.40832	-1.44406	-1.07092	-0.964651	1.29493	-1.40315	0.22643	-0.667056	2.53129	0.0620736	0.788416	-0.433862	-0.283032	-0.410895	-0.196159
b0099	mutT dGTP pyrophosphohydrolase	0.486887	0.398192	1.54306	1.75591	1.03053	0.315079	3.78536	2.86727	-1.79562	1.36282	-1.64715	-3.20068	-0.933192	1.09233	1.47714	0.0605412	0.740625	0.625105	-1.25686	-5.71399	-4.32241	-5.19139	-0.465543	-0.728465	-0.501712	-1.9474	-2.18395	-0.452016	0.98827	-2.41294	-1.45513	-1.49609	-3.33069	0.0928886	-1.48154	-1.80189	-5.99128	1.01377	2.62141	-3.16261	1.88387	2.15305	-4.22494	2.91315
b0101	yacG conserved hypothetical protein with a zinc finger	1.14156	0.765252	-2.171	LQ	-1.1746	-1.27892	-1.12097	-1.37313	-2.08181	-1.03585	-2.1101	-1.43648	-1.1763	-1.41744	-1.58972	-0.837631	0.72878	0.614355	1.32933	-2.66188	-3.31062	-1.2488	-1.17937	-0.303429	-1.29164	-1.76276	LQ	-0.193559	-1.60065	-1.19558	-2.82738	LQ	-2.37095	-2.37206	-0.334434	-2.38101	-2.71704	-0.899415	0.43972	-1.43305	-2.58074	-2.08272	-1.7841	-1.67037
b0102	yacF conserved protein	-0.0146981	0.465751	-1.92682	-2.58667	-0.468956	-1.9493	-0.810993	-0.633637	-1.01904	-0.526916	-1.94911	-3.50149	-1.65591	-2.78225	-2.58918	-1.67446	-3.12377	-2.80212	3.27591	-0.592414	-5.88819	-1.65667	-0.0070325	-3.09014	1.68383	0.656253	-0.112608	1.2894	-0.56462	1.39769	-6.86807	-5.86775	-1.81811	-2.06832	0.621384	-0.987221	-5.56061	0.569546	2.19856	-1.82236	4.36838	0.757395	-2.85853	0.892489
b0103	coaE dephospho-CoA kinase	-1.65911	0.537196	0.250271	0.340751	1.10517	2.0593	-0.20489	1.74554	2.52816	1.89516	1.84647	1.53907	0.809751	2.57087	2.56242	1.25541	-0.96822	-0.441865	0.642924	-0.869661	-0.882421	-0.750633	1.46451	0.192419	0.670329	0.0949734	0.752729	1.20119	1.50745	1.3242	-1.65292	-0.681549	-0.2529	1.71092	1.18414	0.350589	-0.546965	1.74455	0.257856	1.18995	2.2944	0.783747	-0.715447	1.05053
b0104	guaC GMP reductase	0.290014	0.540631	1.06655	-3.53866	0.542649	1.41845	-0.595603	-0.37912	2.12695	2.1432	0.646597	1.49736	1.49312	0.813972	1.05776	2.13457	-2.50024	-1.83652	-3.24659	1.74401	3.75422	-2.71658	1.58446	-0.590183	1.8048	0.406547	0.756927	-0.538475	1.11668	0.630593	-2.00125	-1.25833	-0.864502	1.0019	-2.59418	1.07956	0.192796	0.745731	0.898715	0.0232133	-1.26878	0.274853	-4.90692	-2.25923
b0105	b0105	-0.337376	0.832359	0.426593	LQ	0.326093	LQ	0.837302	0.251855	0.816443	0.685739	0.73446	2.84069	0.420592	2.01231	0.730117	0.761906	LQ	0.529991	1.09355	-0.583409	0.204902	-0.00289181	1.30943	-0.389109	3.10674	1.39364	1.2869	0.0488411	0.421448	0.398756	LQ	-0.0999445	-0.049001	2.12923	-0.134	2.85432	-1.22774	3.64212	2.52575	LQ	0.141357	0.903804	-0.649789	0.323366
b0106	hofC protein transport protein HofC	-0.302908	0.612828	2.20218	0.214788	1.96269	2.58704	0.933924	0.150876	0.496145	2.8276	1.79381	1.53271	2.12981	2.15122	2.00285	1.60617	2.56847	2.77719	1.91812	-2.34531	0.999492	0.29406	2.36404	0.0168309	2.14341	1.5779	1.35512	1.56605	0.703045	0.118096	-2.28138	-2.92818	0.85895	1.44027	1.11061	0.86307	0.961734	1.42084	1.48127	2.44098	3.98722	2.7081	-0.806004	1.50453
b0107	hofB protein involved in plasmid replication	-0.198922	0.290335	3.70056	5.13093	4.09744	4.28409	5.3896	-0.632655	1.10641	5.96887	4.78945	-1.0245	3.63144	3.43876	3.21057	5.45419	0.170838	0.580136	3.42785	0.894519	2.45232	2.21939	4.34309	2.73186	4.72602	3.15047	2.99394	4.37829	1.53023	0.776605	0.815359	1.15647	1.89106	1.56841	2.07163	4.53826	-0.345814	3.42297	2.84488	4.42375	-2.54487	5.48471	1.06841	8.59816
b0108	ppdD prepilin peptidase dependent protein	-1.05059	0.427791	2.64696	1.38416	5.9235	4.82747	4.08515	1.48698	2.7646	6.65031	5.14785	1.98241	4.69218	2.94996	2.97977	3.15392	4.17712	4.28809	4.95902	1.82151	2.99499	1.79449	4.11134	-0.0354358	4.6484	2.95114	2.92537	3.88837	-0.319838	1.96294	-4.12713	-3.01156	5.1899	5.96026	1.91593	4.54519	-0.564806	4.62927	1.61153	4.82038	6.43154	1.75887	2.51423	2.45649
b0109	nadC quinolinate phosphoribosyltransferase (decarboxylating) monomer	-0.583495	0.9302	1.26274	-0.395484	2.99766	2.43573	0.300016	1.43493	2.98673	3.4505	-0.0602171	-0.174203	-1.03275	-0.804463	-0.863843	-0.148464	2.00959	2.12104	0.621079	0.442682	-0.297269	-0.455603	-0.0107866	0.581011	-0.552343	-0.387119	-0.224123	-0.527096	-0.531771	0.519996	-2.67283	-2.52568	0.0674352	0.255226	1.41155	0.362875	-1.11134	0.194469	-1.59979	-0.585757	-0.194622	-0.382876	-0.561112	3.49332
b0110	ampD N-acetyl-anhydromuramyl-L-alanine-amidase	0.480116	0.318982	-0.446099	-2.55809	4.71221	3.78637	-2.54176	-4.03119	4.40956	5.61635	-5.46886	-6.57901	-4.54557	-7.24026	-6.76203	-4.12997	-2.06801	-0.836304	-0.0350053	2.73751	-4.15803	-0.483753	-0.0204821	-1.02563	-4.48435	-4.26783	-3.87926	-2.26574	-3.97552	-1.62541	-10.891	-9.60102	-0.365769	-6.91701	-4.75383	-2.14053	-9.96813	-3.95866	-7.16218	2.91748	5.11304	-5.3705	-8.81283	0.876755
b0111	ampE predicted inner membrane protein	0.974791	0.334259	0.571885	-1.43344	0.112711	1.12666	-1.02457	-5.10689	0.210165	2.42975	-2.55186	-4.30038	-1.3788	-3.06438	-2.313	-2.04274	1.6254	1.65474	-4.24562	2.15389	-5.51108	-6.91754	-0.745751	0.504342	-0.630573	-2.94527	-3.04397	-1.42495	-4.01891	-0.554828	-8.10977	-6.95411	-3.57094	-4.46152	-2.06366	-0.760025	-6.2373	-2.13456	-8.92285	-0.244371	0.386416	-0.612548	-6.49762	-2.39087
b0112	aroP AroP phenylalanine/tyrosine/tryptophan APC transporter	-0.298294	0.838229	1.1508	1.27793	1.11111	1.04573	0.226956	1.46868	1.39044	1.69229	0.781829	2.16452	1.02277	0.618535	0.615964	0.930551	2.5698	2.4341	0.25626	-1.68619	-1.02644	-0.965122	1.16801	-0.205049	1.17448	0.82377	0.679635	0.661961	1.79399	-0.156821	3.10098	3.09251	1.36176	1.01299	1.2499	1.52938	-0.593646	0.472481	0.636305	1.96891	0.087988	0.695638	0.493709	0.797447
b0113	pdhR PdhR transcriptional dual regulator	-0.707072	1.31257	2.52789	2.96226	2.42805	2.20325	3.37212	3.60416	2.4882	3.06646	-0.530027	-1.05356	-1.233	-0.706851	-0.887054	-0.892673	0.746701	0.610475	-1.07288	-1.70087	-1.77399	-1.55238	-0.331697	-0.382998	-0.953989	-1.2178	-0.991524	-0.823207	-0.69599	-0.99494	-1.52222	-1.02679	-1.26506	-1.23928	-2.33174	-0.70446	-1.35657	-0.516697	0.856617	-1.00477	-0.505924	-0.287924	-1.28766	0.784389
b0114	aceE subunit of E1p component of pyruvate dehydrogenase complex	-1.39409	0.30315	23.9451	23.5833	12.6732	15.8252	28.664	25.2973	15.721	17.1567	-4.26679	-1.91519	-4.08664	LQ	-4.18974	-4.04471	-2.502	-3.13667	1.0937	-5.78319	-8.1631	-5.63944	1.09274	-1.17924	-2.65886	-3.48483	-4.45258	-1.88686	-2.0459	-1.85247	-2.41126	-2.00107	-6.69221	-4.80419	-6.39436	-2.50837	3.81256	2.17646	-6.09913	-2.29027	-5.46227	0.470481	-1.45724	6.89378
b0115	aceF AceF-lipoate	-1.9721	0.53579	13.1938	13.3321	6.5361	8.166	15.1884	14.2417	8.29772	9.25763	-1.32599	-4.38572	-1.78765	-0.971251	-4.21511	-1.43847	-4.38572	-4.38572	1.24279	1.60548	-0.740395	-0.269142	-0.570523	-4.12108	-4.38572	0.44759	-0.23067	-1.13063	-4.38572	-3.44285	-4.38572	-4.38572	-1.31931	-4.38572	-3.78043	-4.38572	-0.524768	-2.46318	-4.38572	-4.38572	-3.27364	1.25388	-4.38572	1.00479
b0117	yacH putative membrane protein	0.602478	0.353232	-0.79278	-2.458	0.889228	0.815581	2.49909	-2.01574	0.26104	2.46588	-0.441255	-0.684479	-1.40696	-0.366128	-0.236653	0.258054	-2.04849	-1.74038	2.80897	-1.26593	1.95757	-0.554325	0.0217132	0.27727	3.72562	1.06865	0.819234	-0.667196	0.673884	-0.855647	-3.2372	-2.81232	1.85806	-1.07305	-1.24123	-0.00266081	1.46632	0.89106	0.861423	0.104128	-4.13185	-0.391165	-3.76989	-2.98717
b0118	acnB aconitase B	-1.98461	0.550513	4.07032	3.36724	4.40245	3.96146	4.10047	3.57052	3.06054	4.67708	0.606353	-0.511372	0.0644094	1.2388	1.04599	-1.95859	1.30842	0.920874	3.18493	-0.130132	2.41465	0.757342	0.687643	0.357004	-0.434973	-1.15546	-0.76598	0.541369	0.801302	1.15717	-2.72499	-2.31371	-1.70425	-1.06416	-0.607269	-0.235131	-2.20013	2.5402	-2.15906	-0.296049	3.59818	0.634098	-0.964183	2.00579
b0119	yacL conserved protein	0.598563	0.316857	-1.76998	3.93328	0.499842	0.0604017	-5.52598	2.59961	-1.52825	0.856536	0.282776	-5.44826	2.10247	-1.07019	-1.51611	-2.41373	1.86344	-0.362273	-6.08744	6.31466	-3.82788	1.35385	1.26753	1.75923	2.87829	-0.324962	-0.630287	-1.40916	-0.90755	1.10049	-9.20954	-8.66313	-0.864633	2.34704	-0.449746	-0.598165	-1.48665	0.610443	6.07738	1.71537	5.5662	-5.55286	-0.174901	-1.84944
b0120	speD adenosylmethionine decarboxylase, proenzyme	0.806966	0.247178	5.27313	-1.23529	-5.48797	-4.83112	-0.906511	2.24992	-1.32086	-2.65671	-7.05326	-7.13284	-5.05935	-4.26044	-4.12417	-9.03644	-9.9391	-9.14545	-4.39134	-9.62673	0.715954	-1.43667	-1.53369	0.291288	-1.03336	-5.83002	-5.83199	-3.99183	-6.04657	-3.49293	2.80491	5.06401	-4.89636	-5.95217	-10.5188	-3.79461	-12.2634	0.299076	-2.05573	-4.8626	-7.36049	-3.1079	-10.1106	-1.7018
b0121	speE spermidine synthase	-0.396097	0.512424	3.78801	2.41294	-0.730262	-1.55316	4.54927	0.596972	-1.21736	0.0435721	-1.19021	-1.4701	-0.586128	0.423296	0.473544	-2.19535	-1.69618	-1.0363	-1.39206	-3.66158	2.16371	-2.90796	0.700664	-0.922455	0.754849	0.37662	0.135762	-0.129447	2.92796	0.903941	1.54076	2.11275	-0.386886	0.387112	0.272907	0.747817	-4.29673	-0.668728	0.480586	-1.6227	-3.79687	-2.8961	-2.74325	-3.15209
b0122	yacC predicted protein	-0.750732	0.400054	0.98352	1.27708	3.31672	0.438434	-1.60142	3.16797	1.74684	1.28031	6.26278	5.90069	5.77901	4.76509	5.01085	4.8971	7.17275	6.69117	3.1288	0.460075	3.41773	3.8676	1.57663	3.77102	3.82263	2.99104	2.78594	3.29976	4.40374	0.920247	2.13559	1.66857	5.70651	6.32955	6.79628	2.42658	1.25305	5.03727	3.78358	5.34739	2.95625	1.4374	4.26859	1.35671
b0123	cueO multicopper oxidase with role in copper homeostasis	-0.956194	0.973121	0.609429	0.823347	0.993804	1.15921	-1.0231	0.247912	0.0683767	1.25321	1.10788	-0.346147	1.47201	1.34411	1.31897	1.82624	2.24962	2.36862	1.37526	2.15485	1.64883	0.485076	1.26019	1.12341	0.790466	0.232139	0.299721	0.614618	0.7404	0.390496	0.622775	0.747894	1.08258	0.929588	0.829658	0.658305	1.31018	1.67546	-0.514125	1.51882	-0.140655	0.552227	-0.495101	1.82534
b0124	gcd glucose dehydrogenase	-0.14659	0.281929	2.28643	1.09638	0.747412	2.32422	-3.20718	1.31148	-1.25374	5.31688	0.325875	5.04336	2.64288	1.97507	1.83299	2.02074	-0.651298	-0.6347	0.335564	2.54704	0.654723	-0.407665	2.02769	2.40845	1.17123	-1.49226	-0.0482003	-0.0409634	1.07122	1.47092	1.90997	1.9808	-0.759767	1.43903	0.561755	0.7852	1.78723	4.14484	LQ	0.677902	-0.0631157	3.87419	-0.0702927	2.07042
b0127	yadG YadG/YadH ABC transporter	-0.334136	0.695412	-0.602521	0.495674	0.574774	0.00899036	-3.00781	-1.53556	0.337263	0.751678	1.38351	-1.29984	0.57426	-0.432271	-0.122339	1.12816	-2.72314	-2.52744	0.731881	-1.33594	1.2836	-0.398663	0.837647	0.0493324	-0.0840022	0.504202	0.611374	1.20701	1.00698	2.77663	-2.8147	-3.44962	1.7112	-0.273751	-0.461842	0.249813	-2.19296	1.62922	-0.0468913	0.734974	-3.29562	0.839344	-0.632096	-0.728634
b0128	yadH YadG/YadH ABC transporter	0.702759	0.528132	-5.6302	0.11011	0.115382	-2.91711	-6.48775	0.376795	-3.43503	-2.69522	-2.55734	-5.11692	-2.92284	-4.34652	-4.08617	-2.7755	-7.02403	-6.03922	2.16951	-3.03178	-3.94923	0.627324	-1.24032	-0.640244	-3.56456	-1.65139	-1.39308	-0.412841	-3.08261	-3.02555	-7.19699	-7.34563	-0.702986	0.133748	-1.79083	-3.23411	-5.40605	-3.58267	-6.64091	-4.12319	-3.92408	-5.12152	-0.00082124	-2.1724
b0130	yadE predicted polysaccharide deacetylase lipoprotein	0.475786	0.430224	-0.207399	-0.701986	0.754022	-0.285942	-2.43301	-1.53371	0.464718	-1.05947	0.493294	0.498364	0.196632	-1.35476	-1.17726	-2.00276	-3.94089	-3.49475	-1.60516	-1.11436	0.0462872	0.866315	-0.894085	-3.77506	-0.157355	0.768538	0.536309	-1.45057	-1.08849	-0.296725	-4.90821	-4.26789	1.1506	0.18523	1.50917	-1.19985	0.441031	-0.184058	-2.86707	0.469511	-4.0635	-1.35618	-1.61546	3.13944
b0132	yadD predicted transposase	0.868817	0.536684	0.264324	-1.95999	0.0518797	-0.246045	-1.35793	0.495068	-1.96928	0.519201	-0.443807	-1.04037	0.190054	-2.02913	-2.01601	2.01728	0.944354	1.59609	1.19016	-5.58607	-1.44445	-0.183609	0.0196853	-1.02881	0.064023	0.331043	-0.012285	-0.67029	-1.08243	-0.291783	1.24903	1.89683	1.44887	0.773385	1.0508	0.0453742	-3.32536	0.361422	-3.00443	-0.304168	2.57957	3.19496	0.0678563	1.28201
b0134	panB 3-methyl-2-oxobutanoate hydroxymethyltransferase monomer	1.48293	0.571043	0.00281033	-5.36309	-2.35002	-0.691313	-2.06305	-2.13534	0.0629216	-0.74649	-2.25703	-4.76773	-3.07414	-2.41073	-2.09404	-1.49306	-5.19262	-3.71725	1.04031	0.230502	-0.205637	-3.74939	-1.75511	-1.05648	-0.540102	-1.0709	-0.541322	-2.36054	-0.918253	-1.99299	-2.3694	-1.75296	-2.14451	-2.34545	-3.40679	-1.33048	-0.00164669	-1.622	-4.19104	-2.70019	-1.32772	-2.70582	-2.29353	0.685681
b0135	yadC predicted fimbrial-like adhesin protein	4.57685	0.51946	-4.53892	-5.3976	-3.81788	-4.13765	-5.0417	-2.94267	-2.05732	-7.45043	-2.89707	-4.80954	-2.4442	-3.72839	-3.43819	-2.00306	-3.69053	-3.54949	-3.18331	-2.45266	-2.17712	-2.57869	-3.86997	-3.15314	-3.78927	-3.02305	-2.19437	-1.84593	-3.30059	-4.286	-3.70973	-3.21368	-1.69095	-4.54927	-3.03383	-3.13463	-2.49251	-4.01211	-2.93776	-4.48986	-3.3028	-3.01639	-1.94727	-2.68163
b0136	yadK predicted fimbrial-like adhesin protein	3.49725	0.907285	-3.00689	LQ	-1.91055	-2.91126	-2.40903	LQ	-3.21895	-3.78086	-0.983658	-2.73409	-1.10002	-1.68457	-2.36582	-1.38352	-1.06887	-1.79614	-2.73687	-0.84992	-1.04502	-0.691622	-2.41758	-1.63622	-2.14546	-0.975272	-1.248	-0.858321	-2.64984	-2.45764	0.27961	-0.179308	-0.0502403	-1.5008	-0.46167	-1.71122	-1.25076	-2.48826	-1.15473	-1.86471	-0.454518	-3.42244	-0.639814	-2.08113
b0138	yadM predicted fimbrial-like adhesin protein	0.750321	0.278986	-1.13903	LQ	-2.52126	LQ	-1.4395	LQ	-1.48662	LQ	-0.699989	3.61779	-0.435854	11.2096	LQ	-1.72958	7.61058	LQ	11.6081	14.8026	-1.84579	13.1537	8.95668	LQ	7.87664	LQ	11.2354	-2.65404	8.17078	10.7669	7.89169	LQ	-3.11196	11.2764	-3.38238	12.1174	13.2169	10.1074	10.9204	10.2445	7.6735	-1.53712	11.8073	-1.86889
b0139	htrE putative outer membrane porin protein involved in fimbrial assembly	3.09229	0.336256	-1.95292	-0.590042	-1.12886	-1.29014	-5.31649	1.01504	-3.23969	-5.24393	-0.415381	-1.05057	-0.831433	-0.307049	-0.676076	-0.910067	1.58042	1.31744	-0.901197	1.41395	-0.715371	2.17595	-1.3366	1.01018	-0.120224	-0.30147	-0.161132	1.2787	0.627881	-3.69744	2.73519	2.24579	1.57655	-0.254544	0.654317	0.605739	1.12739	-2.21301	0.603124	-0.0185564	0.795636	-1.55246	1.83559	-1.49761
b0140	ecpD probable pilin chaperone similar to PapD	3.64947	0.47363	-3.98634	-1.41845	-2.76015	-3.11328	-4.7008	0.780193	-6.53787	-8.06816	-2.90531	-3.40845	-1.97738	-2.2845	-2.53314	-1.09535	-1.2187	-1.38894	-3.44928	0.681241	-1.47422	1.09799	-1.67134	0.146263	-1.93852	-0.307395	-0.597738	0.320842	-0.626373	-4.77648	1.01336	1.15432	0.051598	-2.10266	-0.861204	-0.144625	1.22133	-2.48327	0.817698	-1.57194	0.945389	-0.116504	0.94702	-1.23186
b0141	yadN predicted fimbrial-like adhesin protein	2.55757	0.829105	-1.27967	-1.69706	-1.19913	-2.70216	-1.22458	-1.51191	-2.39666	-3.41331	-1.04898	-1.62049	-1.69384	-0.82266	-1.8534	-0.540674	-0.745761	-1.61172	-2.88534	-0.296721	-0.858265	-0.244992	-2.54107	-0.897133	-1.15821	-0.374008	-0.940612	-0.909655	-1.01401	-1.79904	0.117124	-0.244629	0.701422	-1.40176	-0.334926	-0.927226	-0.233443	-1.51916	-0.738404	-1.7002	-0.821284	-2.64327	0.577989	-0.961683
b0142	folK 6-hydroxymethyl-7,8-dihydropterin pyrophosphokinase	0.42204	0.571941	-3.61413	-0.291023	-0.812067	-1.20285	-3.51017	-1.91811	-1.7477	-1.63379	-2.07397	-0.584161	-1.45665	-1.74549	-1.38949	-2.08052	-2.46874	-2.1216	-3.24139	-3.48088	-3.2377	1.10957	-3.18478	-2.31578	-3.2231	-1.70172	-0.983135	-1.59677	-0.520458	-2.85954	-3.81271	-3.06164	-1.61368	-1.33043	0.0907478	-1.40969	1.76522	-1.8713	-2.64253	-0.936663	-3.31094	-3.69816	-1.038	-3.51936
b0143	pcnB poly(A) polymerase I	-0.68942	0.393485	-5.67033	0.014972	-2.47983	-1.54735	-5.38234	0.485592	-3.56051	-3.27894	-1.12294	-2.6201	-3.40414	-0.742409	-0.628519	-4.3827	-5.28177	-4.01933	0.727401	-5.90382	2.99035	-3.12234	-2.45368	-4.16652	-3.31523	-1.77172	-1.5089	-2.07625	-2.61966	-2.567	-1.00789	-1.58744	-2.47314	-3.88544	-1.28876	-0.855859	4.47836	-0.302763	-4.99438	-3.1993	-5.17707	-2.20422	-3.91225	-6.08888
b0144	yadB glutamyl-Q tRNA(Asp) synthetase	-0.598947	0.579909	-0.227928	-0.695344	-0.498768	0.397007	-3.03751	0.218724	-0.487836	-0.334134	-1.18967	0.741109	-1.09735	-0.0049789	-0.00210538	-1.56798	-1.23462	-1.16434	0.89457	-2.09341	-1.95809	-0.0613963	0.350128	-0.285097	0.425993	-0.206264	-0.251462	-0.235739	0.767735	0.583078	-0.481367	-0.564258	-1.19048	0.353711	-3.26339	-0.37493	1.08879	0.746185	-0.912622	0.355194	-0.497677	-0.994135	-0.216724	-2.50876
b0145	dksA RNA polymerase-binding transcription factor	-0.690925	0.781536	0.714241	0.501696	1.31862	1.47632	-1.22491	0.63993	0.988005	0.802598	-0.614242	-0.129889	-0.824481	-0.639818	-0.666654	-0.620976	-1.03057	-1.15302	-0.374661	-1.58892	-0.337983	0.484696	0.0510114	-0.00428898	-0.419865	-1.06938	-1.05181	-0.48003	-0.00961938	-0.308535	-1.52309	-1.70065	-0.961312	0.590226	-0.362551	-0.393905	0.203411	-0.0997516	-1.30754	0.78984	-1.38694	-0.962062	-1.24328	-1.01705
b0146	sfsA predicted DNA-binding transcriptional regulator of maltose metabolism	-0.0644336	0.425296	-0.238136	1.81546	3.87199	LQ	-0.272122	LQ	3.00185	3.38502	2.46371	0.940918	2.7005	0.174578	-0.368507	-0.77422	-0.77471	-0.588774	4.41398	-5.42871	5.00942	1.30998	1.66398	4.13355	2.22234	-0.953497	-0.74764	0.208998	-1.14306	-0.843596	-0.810936	-0.486715	2.99096	4.04323	4.12376	-1.70693	3.08982	-1.21936	-1.87497	2.21316	-5.71376	-1.39821	1.99221	-0.521095
b0147	ligT 2'-5' RNA ligase	0.481903	0.37733	-0.142681	-1.64782	0.854777	-2.0103	-7.02291	-2.78063	-1.05812	0.28802	0.691446	3.3222	0.723168	-0.213839	-0.769098	-0.597261	-4.38527	-4.05253	1.1965	4.4548	1.33955	0.160267	0.515838	0.388872	-0.217653	-2.95817	-3.15809	-1.31915	0.226094	-1.78847	-8.2604	-7.61546	-2.17193	-2.37658	1.03823	-0.0950518	-7.06615	0.444867	-4.60906	-0.681345	-7.00057	-7.22755	-3.56636	-0.249357
b0149	mrcB murein synthesizing holoenzyme	0.247963	0.302881	-4.05909	-3.24581	-6.42721	-5.49521	-8.99486	-4.14401	-6.48449	-1.67108	-7.7501	-6.63344	-8.66678	-6.74717	-7.33442	-10.4832	-5.97686	-6.42206	-6.94707	-10.9761	-5.04441	-10.0884	-2.50016	-1.49748	-6.63784	-4.393	-5.24035	-3.57354	-4.52478	-2.31492	-0.0898549	0.124432	-4.26317	-4.70748	-3.71645	-3.37576	-10.7734	-4.12233	-9.81414	-5.77744	-2.77837	-6.25186	-8.07871	-7.63765
b0150	fhuA FhuA outer membrane protein receptor for ferrichrome, colicin M, and phages T1, T5, and phi80	-0.05893	0.667988	-0.0398738	-0.929576	0.278545	0.996205	0.459533	0.606828	1.43935	1.37187	0.713872	-1.16666	0.579569	-0.095045	-0.582196	1.15438	0.0404015	-0.279654	-0.268782	-0.0289961	-0.188069	-1.33269	0.816467	0.0315706	0.0951619	0.242875	-0.0590932	0.0970915	-0.461098	0.924637	-3.00829	-3.63923	-0.437496	-1.4764	-0.826545	0.38249	-0.5312	0.168847	0.54337	-0.100121	-1.29761	1.8003	-2.44004	-1.09299
b0151	fhuC ferrichrome uptake system	-0.351492	0.322367	0.199712	2.7907	2.20207	1.38454	0.0254619	2.1434	-2.11624	2.85762	1.70605	-3.64887	1.50755	1.42681	2.19146	-0.0439939	-0.86839	-0.741315	1.22263	1.52544	-3.31949	-4.55961	0.507038	-0.0679179	2.95936	2.07536	2.80618	0.537165	-3.20727	-0.672903	-8.79945	-9.89872	1.86718	3.45024	2.71545	2.57334	-7.74497	1.03268	0.172272	0.463584	0.255163	-3.27851	0.960017	-1.98856
b0152	fhuD ferrichrome uptake system	-1.69122	0.849336	2.54083	1.713	2.19628	1.52706	0.701064	0.725216	1.28162	1.28872	1.96081	1.00531	2.25661	1.73573	1.57078	0.027565	2.10041	1.92628	1.19899	1.35431	-0.342354	2.19032	1.81429	1.97903	1.18107	1.32206	1.44205	0.648221	1.65117	1.64361	-0.841039	-1.43966	1.09605	1.82749	0.909691	0.761166	0.800766	2.48195	0.873716	2.51782	1.33379	1.97575	1.06792	-0.331642
b0153	fhuB ferrichrome uptake system	-2.2163	0.763035	3.85899	3.16767	2.40359	1.09286	-1.09643	-0.0165157	-0.244844	3.1201	2.44476	4.45075	1.58423	2.4288	2.65784	1.17579	0.905101	0.954935	3.00426	0.702018	-1.00236	0.371574	3.34094	2.28239	3.97197	2.90703	3.24349	0.647147	1.55734	3.08339	-0.518914	-0.991466	1.38304	2.46887	0.613315	2.01825	-1.25876	2.62194	0.230051	2.99114	-0.950986	2.78016	-0.624999	0.458262
b0154	hemL glutamate-1-semialdehyde aminotransferase	-1.99787	0.570283	0.0581329	3.17553	1.44247	0.946777	0.797203	3.07001	-0.670825	3.22177	-0.171418	1.2594	0.926958	1.11453	1.44588	-0.563243	-1.35485	-0.269086	0.85094	-2.00092	-2.15826	0.445076	0.851224	0.713193	0.568699	0.551555	1.21153	0.473518	0.508137	1.2194	-2.58912	-2.86285	-0.331164	0.762977	1.59092	-0.132808	-2.31906	0.94605	-1.61682	2.18664	-1.6741	-0.973326	-0.350151	2.54818
b0155	clcA EriC chloride ion ClC channel	0.0374258	0.450532	-0.500955	-1.2081	-0.892465	-0.42054	-1.36216	-1.8464	-0.144138	-0.261981	0.334588	-1.2691	0.0220349	-0.00432197	-0.193706	-0.686118	-4.0375	-4.22514	-1.13361	-3.14308	-0.610343	0.267146	0.502143	0.344193	-1.04563	-1.58462	-1.25062	-0.815725	-0.901145	1.04377	-5.62957	-6.23165	-1.09258	1.15843	-0.774571	0.459921	0.215937	-0.153694	-3.96951	1.47258	-3.22299	-0.779793	-2.42551	-2.02393
b0156	erpA essential respiratory protein A	-0.596632	0.378178	2.2373	-0.906686	-0.876509	-1.38507	-2.37395	-1.51039	-0.307002	1.37091	-0.216328	-2.96934	-0.317904	-2.4579	-0.93811	0.307348	-4.90932	-3.05786	5.94755	3.75932	-2.69258	-4.18693	-0.00225071	-2.69924	1.50545	-2.36088	-0.883444	0.362974	-0.265063	-2.17855	-3.40526	-3.87521	-2.31782	-3.39066	-0.821024	2.62632	2.553	-2.7242	-6.1637	-3.49376	-3.51452	-2.05142	-4.78152	3.76674
b0157	yadS conserved inner membrane protein	-1.20076	1.00885	-0.490148	0.749655	0.0854373	0.537819	1.01077	-0.887668	0.174997	-0.00335563	0.00476652	0.772602	0.464561	1.52515	1.56199	0.760207	-0.65022	-0.472141	0.460425	3.21296	1.24073	-1.1764	1.52545	1.24314	0.809899	0.706525	0.679002	1.30993	1.11357	2.50154	0.89564	1.19676	0.933882	1.19572	-0.57065	-0.126915	-0.634179	0.487832	-1.22618	-0.098115	2.51799	0.196397	0.575244	-0.464032
b0158	btuF periplasmic vitamin B12 binding protein	0.170752	1.4534	-1.15104	-1.80832	0.164996	-0.846672	-1.56098	-1.61071	-0.293742	-0.607794	-0.1094	0.52484	-0.264268	-0.583308	-0.620594	-0.415717	-0.677473	-0.642274	0.189986	-0.73932	-1.9074	-0.701227	-0.244897	-0.242825	0.620071	-0.253285	-0.184672	-0.0195681	-1.33619	-0.774265	-2.30954	-2.06769	-0.0653975	0.363946	0.156431	-0.152313	-0.74144	0.0475766	-1.6235	-0.665383	-0.658774	-1.04337	0.379218	-0.555454
b0159	mtn 5'-methylthioadenosine/S-adenosylhomocysteine nucleosidase monomer	-1.43054	0.640856	1.43062	-1.54641	2.38661	1.36984	0.0655535	-0.435368	2.4213	3.51613	0.297197	0.0840148	0.758672	1.30144	1.20501	-0.327933	-1.53061	-0.75279	0.175767	-1.1054	3.48077	0.552964	0.611934	-0.626605	1.05459	-0.5197	0.35162	1.69075	0.455246	0.661148	-2.51768	-1.19754	-0.017476	0.188037	1.81148	0.829499	-1.64516	1.48819	-1.40552	-0.605599	-0.972214	-0.0863226	-0.886647	0.159881
b0160	dgt deoxyguanosinetriphosphate triphosphohydrolase	2.72417	0.356246	-2.93913	-5.57101	-2.13952	-3.49457	-5.52075	-3.41419	-0.143163	-4.85365	-3.16274	-4.17474	-1.6251	-2.6259	-2.91598	-1.99008	-3.40902	-2.58942	-1.47186	-1.71826	-0.930245	-1.82376	-2.60668	-2.42836	-1.76294	-1.6284	-0.76813	-1.43165	-3.30623	-2.68754	-0.876326	0.167274	-1.76159	-2.49565	-0.556793	-2.04055	-1.32359	-2.32368	-2.8598	-2.59429	-5.98084	0.365111	-1.48048	-0.0172377
b0161	degP serine protease Do	1.28229	0.318616	-1.59198	-2.88859	-1.46232	-2.89473	-9.00934	-3.05337	-5.15918	-3.45955	-0.999539	-0.876261	-3.33234	-2.4142	-2.44547	-2.49015	-0.255994	0.371416	-3.89428	-3.13968	-3.95252	-5.2381	-1.56664	0.396757	-0.80781	-0.546228	0.704427	-0.31725	-1.02784	-2.82921	-1.03163	-0.443024	0.19872	-0.310971	2.19719	-1.22108	-1.63125	0.482183	-1.45947	-0.800453	-0.789688	-3.29454	-6.02274	-7.2708
b0162	cdaR CdaR transcriptional activator	0.418281	0.466236	-1.65692	-0.877492	1.1411	-0.475915	-4.7595	-0.720052	-2.04494	3.13222	0.756575	2.15764	-0.0263766	0.750391	0.891175	-0.718874	-0.817643	0.24782	-1.70387	-0.095705	1.67882	-0.986353	-0.010659	2.80991	1.5626	0.333234	0.436128	0.326173	0.592969	-0.752749	-6.32849	-4.81933	2.70274	0.319578	2.56913	-0.123709	-2.82725	0.997599	0.252558	1.48031	-0.472634	-1.36856	0.971765	-1.93867
b0163	yaeH conserved protein	1.53622	0.506062	-4.33902	LQ	-3.64388	LQ	-5.48039	LQ	-1.97886	LQ	-3.64092	-3.79525	-2.04911	-3.58333	-3.03542	-3.29153	-1.52542	-1.51038	-3.98881	-0.432695	-1.67396	-5.31858	-2.98616	-1.06677	-3.44153	-2.10258	-2.49197	-1.41479	-3.63682	-3.8067	1.42021	0.825771	-2.91366	-5.56572	-3.8663	-1.1443	-2.05797	-2.49852	-6.01617	-3.94856	-6.2485	-4.39437	-4.46223	-2.37435
b0164	yaeI phosphodiesterase	1.06304	0.541962	0.617667	-4.65213	-0.644294	-1.1821	-4.77982	-3.22209	-2.16831	0.174428	0.104703	-1.25394	-1.19897	-0.0307361	0.0478012	-0.706492	-5.79618	-5.16044	-0.0411072	-0.0297176	0.827268	-0.0891482	-1.63355	-3.33016	-0.844767	-0.142891	-0.139796	-0.908083	0.733115	-1.94728	-4.28579	-4.08355	-0.566068	-6.09938	-0.532141	-2.1271	-4.10164	-2.66612	-2.5029	-0.413182	-5.95493	-4.80655	0.198093	-3.32125
b0165	b0165	0.530865	0.834275	-1.22093	-0.628076	-0.707001	-0.824153	-1.23564	LQ	-1.08446	0.250204	-1.02214	0.398516	-0.639761	-0.900032	-0.636922	-1.26411	-1.02917	-0.722087	-0.322101	-1.27935	-1.39868	-0.678386	-0.167857	-0.547013	-0.457321	-0.813738	-0.733532	-0.381538	-0.146474	-0.149535	-1.76926	LQ	-1.14041	-1.02915	-0.495591	-0.888683	-1.37312	0.142866	-1.15288	-0.521659	-1.3154	-1.2176	-0.972122	-1.15039
b0166	dapD tetrahydrodipicolinate succinylase subunit	-0.634314	0.618105	-1.92124	-2.70409	0.357913	-0.47937	-3.06432	-2.08913	-1.5036	0.554444	-0.239697	0.935897	-0.567227	-1.44707	-1.36955	-1.25831	-3.08846	-2.95358	-1.66888	0.294616	-2.62208	-0.504958	-0.995944	-2.719	-1.58285	-1.44853	-0.97076	0.512374	-1.30216	-1.21441	-3.55401	-3.39572	-1.79698	-3.21258	-0.594775	-2.40112	-3.14909	0.0315643	-1.22039	-1.36766	-1.20392	0.0897237	-1.88384	-1.74027
b0167	glnD uridylyltransferase / uridylyl-removing enzyme	-1.95785	0.471036	0.568468	-0.276565	2.13534	1.9167	-0.820342	0.221735	1.15909	1.6933	-0.596099	1.29283	-1.1576	0.0494121	0.699878	1.582	-0.458881	-0.386937	2.31822	-1.60105	3.36666	0.559892	0.682656	1.51892	0.964173	-0.135825	0.211174	1.57975	1.37587	2.55341	-0.85718	-1.18144	-1.66445	-1.22615	-0.820178	-1.35179	-0.943633	2.81934	-2.12418	0.472123	4.03752	-1.17783	0.041638	4.45436
b0168	map methionine aminopeptidase	-2.46588	0.640742	0.449178	1.09754	1.54674	2.26259	0.643518	2.4659	2.2662	1.70948	0.539416	1.35095	1.41146	2.1164	2.19542	0.681799	-0.323724	-0.0592325	0.984518	-0.863268	1.00156	-0.17501	0.920579	4.44964	1.09315	2.54917	2.68963	1.01041	1.038	1.36932	-0.662834	0.210839	0.0406339	-0.0403467	2.11031	1.76472	-0.261995	2.19407	-0.375388	1.06656	-0.314952	1.01259	0.521949	0.464959
b0169	rpsB 30S ribosomal subunit protein S2	-2.37246	0.752283	-0.181672	0.767651	-0.255363	1.02504	-0.325571	0.319572	0.712025	1.51326	0.451762	1.2219	1.53398	1.28771	1.47024	0.0147863	-0.156898	0.0258703	0.918214	-0.514464	-0.195457	-0.221373	0.590224	1.72817	1.17702	0.949503	0.892906	0.162509	1.04616	1.30785	-0.62796	-0.260758	0.334871	0.145153	-1.20445	0.51742	-0.266631	1.62348	-0.543246	0.744494	-0.468763	0.112462	0.317558	-0.161668
b0170	tsf protein chain elongation factor EF-Ts	-2.53762	0.809788	0.0905999	0.902055	1.38689	1.46944	0.389574	0.380498	1.14249	2.13018	0.469489	1.3416	0.426604	0.90142	0.724121	1.53298	0.0970674	-0.00153603	1.71659	-0.287437	-0.227987	-0.074125	1.20573	0.00084906	1.20764	0.275825	0.115589	0.929334	1.22593	1.1112	-0.571351	-0.639117	-0.0272617	0.344703	-0.781571	0.486194	-0.293262	2.19365	-0.410748	1.87534	0.51195	-0.0599025	0.479604	0.334212
b0171	pyrH uridylate kinase	-2.56419	0.595631	1.74853	3.72301	3.43043	3.71466	2.53197	2.58785	3.58775	5.57862	-0.123491	1.20444	0.15552	1.54967	0.489823	1.43685	-0.330429	-0.398743	0.833732	-0.216209	-0.296941	-1.37791	1.20642	-1.07175	1.45575	1.14435	1.10041	-0.805837	1.10018	1.37992	-1.16577	-1.53136	-0.00402968	0.0800877	-1.40298	1.03732	-1.39697	1.88252	-1.58751	1.22967	1.78238	-0.427099	0.324319	4.3028
b0172	frr ribosome recycling factor	-0.134504	0.808586	1.5082	4.2811	4.80044	1.82805	3.38942	3.01639	2.96227	4.01848	-2.34852	-1.24548	-2.16723	-2.01876	-1.84182	-3.16562	-2.50175	-2.16494	-1.53988	0.768724	-2.95949	-2.60436	-1.70968	-2.21429	-1.41719	-0.243832	-0.479199	-3.14751	-1.24546	-1.28915	-2.77099	-2.69298	-2.39907	-2.26855	-3.55115	-2.38248	-2.77548	-0.81181	-2.90167	-1.55969	-2.5617	-2.48142	-2.02242	-2.29094
b0173	dxr 1-deoxy-D-xylulose 5-phosphate reductoisomerase	-3.51044	0.617021	1.02759	6.55439	6.05975	4.79225	2.27776	5.342	1.93607	7.5124	1.7325	3.68249	1.66162	2.50396	2.29903	0.540059	2.5006	2.02339	3.61605	2.02171	-0.219597	2.12031	2.86196	3.58383	3.14812	3.83592	3.77275	0.995102	3.78176	3.49294	1.10881	1.55934	1.1201	1.67873	-0.357663	1.6652	1.92883	3.78814	1.7604	3.18791	2.06585	0.224919	3.13562	3.75236
b0174	ispU subunit of undecaprenyl diphosphate synthase	-2.81685	0.660564	-0.656852	1.4022	1.00043	1.74621	1.11025	1.96747	1.18538	2.69265	0.804182	1.61459	0.111159	1.95013	2.07423	0.783298	0.663498	1.05315	2.94661	0.487293	-0.480899	1.22265	1.4896	0.358438	1.45328	0.251249	0.794145	1.02489	1.69435	1.74917	-0.195407	0.204537	0.142794	0.637936	-0.09863	2.75555	0.33168	2.08553	0.442242	0.903653	0.737597	-0.426127	1.37884	0.85582
b0175	cdsA CDP-diglyceride synthetase	-2.79742	0.5189	-0.22331	1.71271	0.686528	1.54448	-0.305853	1.51056	0.349563	4.64031	3.74944	1.37691	0.102042	1.60014	1.60415	0.945309	4.08704	3.76808	1.0524	-0.799835	-0.861248	-0.572981	2.29637	-0.455236	1.05503	-0.290415	-0.117928	3.75374	1.28075	1.87295	-1.13939	-1.58812	0.480842	-0.276051	-0.441963	1.94039	-0.935849	1.82483	-0.357504	0.904757	-0.195237	0.658157	0.202917	1.09178
b0176	rseP RseP zinc protease	-3.13176	0.692231	-0.125988	0.993576	0.895245	3.02414	0.0176112	2.09578	-0.46614	2.30959	0.875382	1.67178	0.467576	2.38959	2.23013	2.66302	1.12121	2.10452	1.44588	0.414085	-0.745035	0.428937	1.69585	0.331182	1.49846	0.20525	0.483079	1.53965	2.16927	2.29872	-0.466853	0.023111	0.300924	0.420464	0.125601	2.22037	0.157604	2.13577	0.519995	0.6686	1.16847	1.47406	0.832178	3.77377
b0177	yaeT Outer Membrane Protein Assembly Complex	-3.54978	0.734861	-0.324984	3.84328	0.90797	2.50834	-0.153646	1.71449	1.45614	2.37568	1.83918	2.59816	3.1771	2.16438	2.40435	0.452791	2.36446	2.45204	2.06568	1.34645	-0.625727	1.67811	1.96773	1.6781	2.1294	1.67432	1.86291	1.2204	2.30482	2.25046	0.832652	1.16154	0.0524386	1.34065	-1.05075	1.75123	1.61724	2.78362	1.38117	1.95734	1.35636	0.765761	2.58467	0.613717
b0178	hlpA periplasmic chaperone	0.650646	0.317903	-1.10082	-6.73079	-1.10464	-8.10862	-0.578958	-10.1635	-1.29877	-3.94984	-0.595333	2.63083	-0.637003	-3.17257	-5.35785	-0.762756	-9.52369	-6.11997	-9.51895	-8.99694	-1.33259	-5.14649	-6.61947	-9.56983	-2.68309	-4.60718	-5.2336	-0.686206	-4.27454	-7.61626	-9.849	-9.03716	-0.523734	-11.0434	-1.24649	-5.87228	-0.138066	-3.51309	-13.8371	-9.93236	-11.0408	-0.932824	-0.682696	-0.938516
b0179	lpxD UDP-3-O-[3-hydroxymyristoyl]glucosamine N-acetyltransferase	-3.27528	0.768448	0.998337	0.688689	1.32835	2.26407	1.12992	0.685797	1.73338	1.99412	1.9529	2.61018	1.34589	1.64531	1.73262	0.824681	0.815065	0.814011	1.47905	-0.322891	0.383474	0.14383	1.77258	0.223072	1.7568	1.7261	1.60376	-0.20418	1.41094	1.60745	0.0340281	-0.574207	-0.28267	0.61978	-0.629633	0.0510837	0.075193	1.77263	0.135292	1.72748	0.379465	0.758263	0.720924	0.517163
b0180	fabZ beta;-hydroxyacyl-ACP dehydratase	-1.94592	0.688947	0.106716	1.46298	0.448816	0.977233	1.00605	-0.0630096	2.19924	1.27555	2.29	1.78365	1.53433	0.696654	0.713711	0.196955	0.258366	0.613508	1.75006	-0.0464499	-0.293668	0.20029	1.116	0.689579	1.42407	0.369661	0.922786	-0.282709	1.77252	1.57486	-0.71205	-0.0350478	-0.211435	0.641238	-0.681392	0.289937	-0.0357638	1.91217	0.403637	1.19125	-0.0516432	0.36879	0.460122	0.255693
b0181	lpxA UDP-N-acetylglucosamine acyltransferase	-2.75513	0.643646	0.226307	0.816028	-0.144866	1.25517	0.793766	LQ	0.544565	1.24948	1.46442	1.92418	0.952692	1.40588	1.32649	0.676518	1.3234	1.18715	1.6564	-0.409472	0.363523	-0.216576	1.93157	-0.284986	1.76804	0.934078	0.0978102	-0.652816	1.58266	2.00566	0.492894	-0.406587	1.13891	0.533736	-0.910432	-0.112508	-0.688049	2.10897	-0.369138	2.00216	0.272245	0.338542	0.769649	0.934014
b0182	lpxB lipid A disaccharide synthase	-2.86828	0.724416	0.253142	0.601902	-0.118203	1.60657	0.423406	0.483519	0.203915	1.14019	1.1402	1.64451	0.758518	1.57444	1.12673	0.417399	0.962712	0.240322	1.38077	-0.51371	-0.0239396	-0.140387	2.00082	-0.462086	1.6791	0.713543	0.195106	-0.737509	1.43144	1.91759	0.465888	-0.814331	-0.321486	0.435162	0.0905954	-0.168458	-0.404268	2.04243	-0.47775	2.03605	-0.107226	0.0527954	0.824947	0.45669
b0183	rnhB RNAse HII, degrades RNA of DNA-RNA hybrids	-2.35894	0.887854	0.41399	0.739682	-0.0704662	1.57712	0.0850757	1.27845	0.208549	1.39403	1.56558	1.19924	1.03996	1.94228	1.71847	-0.00756586	1.78707	1.55425	0.954509	-0.0987594	-0.378072	0.0817812	1.72492	-0.403197	1.4756	1.08635	1.11283	0.442889	1.12383	1.31149	-0.274797	-0.300205	-0.306222	0.138926	0.765556	0.249619	1.30116	2.61832	-0.642802	1.14858	0.246169	-0.0311675	-0.12398	0.17701
b0185	accA acetyl CoA carboxylase	-1.92266	0.633431	-0.704026	-0.965485	-0.0668045	1.35784	-0.314456	-0.770469	-0.0225058	2.65242	-0.320772	-0.185586	-0.267949	1.01797	1.05648	-0.526125	0.0456523	0.420302	-0.552055	-2.42814	-1.30123	0.731305	0.755208	-1.71769	-0.0761154	-0.42263	-0.224885	0.51264	-0.0189616	-0.220212	-1.30331	-1.46383	-0.416864	-0.300452	-1.55557	0.182253	-1.78535	0.440039	-2.14252	0.69617	-2.09902	-0.069444	-1.52728	0.477971
b0186	ldcC lysine decarboxylase 2	-0.326502	0.441324	-0.507597	1.18441	0.116977	1.21474	-0.448139	0.803686	1.28104	2.72219	-0.32643	-2.05124	-0.714144	0.320049	0.129483	0.0877802	-3.33771	-2.80035	2.03722	-0.988679	-1.08711	-1.64538	1.53584	2.21366	0.56114	0.229082	0.231681	-0.179451	2.49034	-0.17488	0.403689	0.768216	0.00410648	0.624626	-0.870765	0.136493	-1.08921	0.210789	-3.33261	0.584839	-4.36848	1.11556	-0.38665	1.12368
b0187	yaeR predicted lyase	-1.02295	0.70548	0.897678	0.128216	0.592983	1.72027	-0.811844	0.514568	1.43601	2.73035	1.75674	0.394269	1.26107	1.95388	1.89518	-0.114	1.45713	0.956114	0.336241	-0.267548	-1.154	-0.359477	0.996964	0.295314	0.641964	0.451279	0.869687	0.131714	1.67068	0.897546	0.780618	1.05464	0.39671	0.755113	-0.870693	1.1893	-0.529625	2.36289	-0.796305	0.738401	-0.575763	2.23172	1.73289	2.12351
b0188	tilS tRNA Ile-lysidine synthetase	-2.11286	0.426415	0.325254	0.381469	-1.33269	2.79949	-1.20511	1.44192	-0.84832	3.71042	1.90489	3.62347	1.19102	3.22736	2.8629	0.399166	2.39191	1.58319	2.25552	-1.07729	-2.20505	-0.504975	1.93437	-0.497293	1.78768	0.491051	1.2779	-1.06662	2.359	1.99138	-0.410309	-0.310135	-0.855691	1.08554	-2.98999	0.346249	-1.14531	2.63342	-1.34694	1.61769	0.089102	-0.796684	1.66949	-1.13592
b0189	rof Rho-binding antiterminator	-0.0293406	0.86831	-1.77482	0.0407406	-1.09582	-0.233466	-1.6987	-0.461551	-1.19346	0.429388	-0.388497	0.0269072	-0.736417	0.395368	0.122895	-1.10244	0.244147	0.0560829	1.38276	-1.32275	-2.04922	-0.929852	-0.520411	0.275351	-0.383146	-0.788518	-0.523246	0.0792375	0.792896	-0.238692	-1.74126	-1.30055	-1.40481	-1.04079	-1.09834	0.0127967	-1.46937	0.00982037	-1.18989	1.16961	-1.14427	-1.79357	-0.552789	-1.07986
b0190	yaeQ conserved protein	-0.968102	0.738132	-0.119825	1.78775	1.32935	1.01788	0.469098	1.79052	0.261813	2.3653	1.87905	3.39448	0.900125	1.09267	1.23157	0.710177	-0.0668715	0.169013	1.39305	-1.5323	0.601572	1.74979	1.34092	-0.946882	1.05055	1.49975	1.29577	0.115419	-0.335992	0.900721	-2.71827	-1.97715	2.17927	1.49932	2.60538	1.4007	-2.07692	-0.0584973	2.4416	1.89488	-1.56743	-0.599607	1.63536	-0.403367
b0191	yaeJ conserved protein	0.527811	0.530923	-2.14727	-0.466013	-0.891854	-2.22973	-2.53216	-2.47187	-3.2011	-3.45033	-0.744844	-2.92638	-0.336297	-0.0142891	-0.370051	-0.84879	-2.6345	-2.36485	-4.93023	-6.21416	-3.67124	-2.84965	-0.14855	-1.89955	0.00290581	-0.0564046	-0.367002	-2.05693	-1.81942	-3.64385	-7.66359	-6.3793	-0.315962	0.265239	0.362288	-1.35598	-6.65968	0.694792	-3.7649	0.540479	-8.28043	-3.31153	-1.1713	-1.7986
b0192	nlpE outer membrane lipoprotein NlpE, involved in surface sensing	-1.44484	1.08036	0.816432	2.55625	1.19883	0.931013	2.32323	0.356967	1.55768	2.64677	0.911768	1.36292	0.935972	1.37705	1.3881	0.45765	1.44596	1.36831	1.19357	0.273864	-0.0982465	0.250706	1.33962	1.05664	1.10961	0.571104	0.739476	1.28883	0.426962	2.44269	-1.14204	-1.03759	0.616124	1.32502	0.225252	0.536245	-0.367188	0.501585	-0.598934	1.60452	-0.773076	0.218486	0.00166452	-0.00915621
b0193	yaeF predicted lipoprotein	0.718488	0.631264	-2.04352	-3.43648	-0.762063	-1.05791	1.72207	-0.678696	1.5359	0.651338	-0.805727	-5.31117	-1.03985	-0.566129	-1.12849	-2.20798	0.628698	0.162354	-1.28508	2.79305	-3.55472	-0.650564	0.677307	-3.44727	0.127257	-1.19782	-1.61052	-1.95727	-3.85152	1.17283	-6.86791	-6.74931	-2.03817	-3.02356	-3.05677	-1.24059	0.829853	-1.49555	-1.6609	-1.294	-7.65838	0.316573	-0.624409	1.2738
b0194	proS prolyl-tRNA synthetase	-2.61821	0.559769	-0.180887	1.92046	0.171933	2.10667	1.14302	1.64654	0.989821	3.41859	0.190149	2.42528	1.9469	2.01694	1.95772	-0.662396	1.5782	1.95851	2.31606	1.53972	-1.41207	0.632358	2.4766	1.62552	3.49996	1.89302	2.13022	0.236475	2.50961	2.71715	-0.689516	-0.443883	1.56796	1.03328	-1.90558	0.967947	0.707658	3.00571	0.414093	2.40192	0.428145	-0.176329	0.900959	1.8965
b0195	yaeB conserved protein	-0.464502	0.865788	-0.199789	0.242603	0.540751	0.0234719	-1.93034	-0.0856691	0.744206	0.215788	0.386678	0.169447	-0.717207	0.18984	-0.215279	1.46762	1.29071	1.18838	0.228904	0.339774	-2.08259	-0.296731	0.736561	-0.262621	1.41426	0.265717	0.221666	0.107403	0.856086	1.52062	-1.74248	-1.67292	1.07115	0.595927	0.757571	0.00446968	-0.00712732	-0.848273	-1.74976	0.253649	-1.1746	-0.143883	-1.22492	0.501502
b0196	rcsF RcsF-P	0.88698	0.606205	0.257645	0.319752	-0.777001	-0.663671	-3.21822	-1.32276	-1.00924	-1.34476	-2.69037	-2.83527	-3.28683	-2.36969	-2.76094	-2.38591	-1.33259	-1.49739	-3.65766	-5.53582	-2.00465	-0.271738	-0.169103	-1.26771	-0.643416	-0.578572	-0.875155	-1.36312	-1.8664	-1.86831	-4.90192	-5.94881	0.00680046	0.570149	0.474733	-1.04891	-5.02024	-2.47953	0.000829089	-2.16289	-1.41959	-2.67987	-2.06944	-3.5721
b0197	metQ L- and D-methionine uptake ABC permease	0.616886	0.70635	-1.3919	-1.15448	-2.07783	-1.07588	-3.96119	-1.65494	0.369759	-0.497548	-0.782425	-0.673971	-2.05728	-1.28887	-0.928137	1.20479	1.34679	0.949717	-1.0092	0.820374	1.53938	-1.72608	-1.49486	-0.806982	-2.25826	0.438355	0.392641	0.221307	-1.27517	-1.42503	-2.55083	-2.16903	-0.828194	-0.265839	0.10037	-2.14699	-1.52125	-2.1063	-3.90716	-2.27351	-3.3194	-4.19358	-3.37684	-0.856679
b0198	metI L- and D-methionine uptake ABC permease	-0.401043	0.632638	0.507387	2.38258	-0.389661	2.29798	-0.170883	1.81426	1.77971	2.90212	0.765963	1.92374	-0.615656	0.18819	0.550518	2.99734	0.506539	0.0403649	4.28632	2.15438	4.21228	-1.35164	1.09298	2.57183	-0.50061	0.711197	1.30419	2.22132	1.30038	2.51177	3.7344	3.82483	0.0358428	0.927498	0.730229	1.34049	3.3886	-0.711381	-1.92474	-0.60492	-3.64384	-0.825825	0.00196142	2.13896
b0199	metN L- and D-methionine uptake ABC permease	-0.594801	0.319494	-3.51205	-1.58196	1.24663	1.63344	-1.71193	-3.12925	0.296434	5.16049	1.21163	-0.908893	-1.65461	2.44926	2.51928	1.8761	4.56344	4.98187	1.69205	-0.733233	-1.23652	1.2553	0.293668	-1.51532	0.760339	0.800102	0.422021	-1.08917	0.299453	1.1773	3.27049	4.35209	-0.538113	0.57218	2.63844	0.718739	-1.62785	2.44271	-3.92958	-2.58014	-4.72777	-5.54485	2.27554	0.303842
b0200	gmhB D,D-heptose 1,7-bisphosphate phosphatase	-1.33607	0.622309	-1.08726	0.276858	1.5838	0.570876	-0.892204	-0.0757556	0.853321	1.7485	0.555754	0.569061	-0.49605	0.639704	0.601882	-0.603891	0.270543	0.583745	0.442743	-0.713534	-0.499505	1.54186	0.714276	0.517323	0.387969	-0.288312	-0.158672	0.154899	1.46313	2.93755	-1.11622	-0.651837	0.901069	0.44681	2.11594	0.843769	-0.846744	1.40565	-0.857414	0.342704	-0.955171	-0.188438	1.16442	-0.60894
b0207	dkgB 4-nitrobenzaldehyde reductase [multifunctional]	-0.453662	0.320061	-1.68417	2.38008	2.35523	1.46982	-5.46052	-3.89168	0.381513	2.91755	-3.27849	3.5798	-2.26647	0.116771	-0.613508	-2.23784	4.86534	3.77075	-4.48623	-4.94054	-5.96143	-6.55337	-1.15921	-5.48786	0.425973	0.774506	0.199484	-1.63783	-3.96056	-0.760105	-3.82102	-3.45868	4.07659	-2.1966	3.89556	3.08792	-4.64444	-1.65554	1.1497	1.07575	-6.24824	2.41338	-4.0953	-3.81114
b0208	yafC predicted DNA-binding transcriptional regulator LYSR-type	-0.0977251	0.431831	-6.00957	LQ	-1.42396	0.0710065	-6.47576	LQ	0.16188	-3.04479	-0.900561	2.93189	-2.53828	-0.346333	-0.294401	-0.466789	-2.54763	-2.41086	-2.37153	1.61848	-4.169	-6.94178	-1.45853	-1.51476	-2.88956	0.440142	0.397723	-1.22842	-2.16424	0.335901	0.435659	1.26187	-1.12633	-0.593504	-1.97467	-2.31632	1.70574	-2.17227	-0.822132	-0.658068	-1.15447	-1.35283	-1.03348	-4.28386
b0209	yafD conserved protein	-0.335639	0.414084	-2.40758	-2.01696	-0.370056	-0.690051	-6.04593	-2.04757	-1.23936	-4.25734	0.173103	3.53623	1.96725	4.85095	4.1967	1.90732	-0.991995	-0.815744	-3.96961	-4.39603	0.598804	-5.36648	2.0952	1.9745	6.90707	6.30768	6.23538	0.852102	-2.29097	-0.350946	-4.90844	-3.44229	-2.27361	-4.15381	2.24853	1.18826	-5.24264	-2.55386	4.90906	3.06063	-6.26699	4.43891	-2.43691	-2.81718
b0212	gloB glyoxalase II	0.828318	1.10218	-2.57522	-0.368084	-0.768807	-0.904818	-1.65986	-0.936949	-1.16617	-1.89628	-1.80031	-1.7217	-2.46575	-0.234215	-0.505875	-0.76889	-1.37459	-1.29845	-1.74079	-2.50136	-2.587	-2.21023	-1.48352	-0.592054	-1.54305	-0.993551	-1.09352	0.0595221	-0.894317	-0.859418	-2.69858	-2.21036	-1.78464	-0.838448	-2.94685	-0.680718	-1.96515	-1.32517	-2.01742	-1.43296	-2.58441	-0.774584	0.29241	-2.03004
b0214	rnhA RNase HI, degrades RNA of DNA-RNA hybrids, participates in DNA replication	-1.08715	0.682714	-0.727498	-0.275681	-0.74438	0.410004	-0.56594	-0.342601	-0.593981	0.169398	0.394813	0.434506	0.150088	-0.452975	-0.276515	-0.805853	-0.920976	-0.504182	0.0290659	-1.11652	0.465953	-0.477691	-0.125253	-0.518272	-0.00264809	-0.0766458	0.230607	1.00021	0.339454	0.545664	-0.0673287	-0.0400648	0.675676	-0.0246661	-1.68968	0.211976	-1.22159	0.77332	-0.810448	-0.0284483	-0.994147	-0.098043	-0.573697	-0.731751
b0215	dnaQ DNA polymerase III, epsilon; subunit	-2.50856	0.840999	0.186205	1.20458	0.550414	1.87413	0.0290249	1.42131	1.27641	1.36258	1.30913	1.08989	0.95863	0.653893	1.19366	0.599827	0.758432	1.38223	0.656734	-0.00311084	0.2514	0.70727	1.04358	2.19563	0.876247	1.78336	1.94323	2.0223	0.930792	0.946719	0.241872	0.632144	0.782086	2.83625	0.696448	1.3257	0.0246563	1.32415	0.504714	0.813475	-0.139245	0.231879	0.984586	0.643876
b0217	yafT predicted aminopeptidase	0.0570995	0.562025	0.963095	0.419163	0.014462	-1.07178	-2.83354	1.56727	0.703534	-1.62042	0.85863	-1.44711	1.93094	0.529818	0.482602	0.626739	0.619041	0.466354	-0.47702	-3.4139	2.67988	1.06889	1.26101	0.376876	0.312539	1.15838	1.10899	1.64098	0.988341	-1.35445	-0.0828225	0.263668	0.863885	1.3386	1.83573	1.4806	2.39161	1.78392	1.60102	1.17533	2.50272	0.219887	2.49454	-0.144741
b0218	yafU predicted inner membrane protein	2.45212	0.387069	-5.97797	-4.73108	-4.34423	-4.68777	-8.6988	-1.23003	-4.87414	-6.26181	-2.30529	-5.78816	-1.20425	-2.62886	-3.2957	-2.2462	-0.462391	-1.65092	-5.94596	-8.02675	-2.73151	-2.81692	-2.33264	-1.31435	-2.21196	-3.80068	-4.46771	-0.616635	1.38988	-5.29317	-0.303128	-2.08	-3.26911	-3.89117	-0.701036	-2.10526	-3.59076	-3.31767	-2.04168	-1.62082	-7.28084	0.991664	-2.96282	-2.66208
b0219	yafV predicted C-N hydrolase family amidase, NAD(P)-binding	0.330082	0.466057	0.252125	-1.86026	-1.38518	-0.942472	-0.669068	-0.244713	-1.86387	-1.86378	-0.562331	-2.74129	0.441929	0.0199836	0.430077	1.07351	-0.864594	0.286628	-1.87812	0.9669	-4.21629	-2.14289	0.220276	-1.05211	-0.563752	-2.07524	-1.07219	-1.26746	-0.80754	-1.02506	-2.89424	-1.17244	-0.818331	1.81353	-0.214946	-1.62281	-2.55394	-0.0652641	-3.48829	-2.18863	-4.1892	-1.06533	-3.47787	-1.5417
b0220	ivy inhibitor of vertebrate C-type lysozyme	0.900723	0.382071	-2.48743	-3.03094	-0.939979	-2.06811	-4.3677	-1.28302	-1.47825	-1.75159	-0.826591	-5.14638	-3.21824	-2.0819	-2.01486	-1.74764	-1.37877	-1.0232	0.378703	-4.53804	-6.28456	0.676622	-3.19865	-0.0838618	-0.0285675	-0.567726	-0.998268	-2.96974	-4.4101	-2.25505	-1.1302	-0.986051	-0.312744	-0.814365	-1.19159	-1.79286	-5.24696	-0.560185	2.67196	-3.00768	-6.10848	-5.57133	-5.66434	-2.35686
b0221	fadE acyl-CoA dehydrogenase	-0.443452	0.481532	-0.811849	0.11532	-1.45579	-0.428339	-0.88692	-0.758868	0.505828	-0.530462	-0.634022	-1.64878	-0.933363	-0.589463	-0.374347	-1.47541	-1.1083	-0.910657	0.540682	-4.30907	-2.47421	-3.41633	0.54764	-3.15075	-0.647973	-1.52708	-1.32201	-1.0428	-0.192983	-0.00992944	-3.65077	-3.91192	-1.53114	-2.05807	-1.9378	-2.19066	-0.614163	0.475855	-3.88915	0.232874	-1.96776	-1.53834	-1.31024	0.631646
b0222	lpcA D-sedoheptulose 7-phosphate isomerase	-1.5366	0.813997	-0.0289832	0.85659	-0.379477	0.522874	0.349328	2.19938	-0.102886	0.707279	0.0730253	0.222336	0.475862	0.61036	0.381109	0.269426	-0.309684	0.0278677	0.427857	-0.760556	0.039923	-1.03183	0.706973	-0.569071	0.563819	-0.592598	-0.659304	0.34604	0.380048	0.362515	2.4719	2.41368	-0.914733	0.415871	-1.23955	-0.0117888	-1.00245	0.536557	-1.20465	0.239639	-0.639201	-0.298442	-0.179472	3.19423
b0224	yafK conserved protein	1.4894	0.601675	-3.45998	-1.9923	-2.17393	-2.69612	-5.08959	-3.83655	-1.96133	-2.18363	-3.65278	-4.9313	-2.42154	-3.49771	-3.39491	-5.03438	-5.94565	-5.24975	-4.58441	-1.91513	-4.0036	-3.60191	-1.12264	-1.09578	-2.29646	-4.31228	-4.334	-2.36791	-2.40794	-0.325673	-5.73422	-4.95477	-2.07821	-2.72308	-2.7311	-1.39859	-4.59793	-4.12488	-3.26465	-4.23997	-1.88714	0.274123	-3.0388	-1.96597
b0225	yafQ toxin of the YafQ-DinJ toxin-antitoxin system	1.11748	1.07151	-1.97747	-1.02522	-1.36216	LQ	-1.804	LQ	-0.546603	-1.03991	-1.12797	-0.703158	-1.13592	-1.24786	-1.29158	-1.47093	-1.45057	-1.23093	-0.640592	-1.60812	-1.60683	-1.32041	-0.97856	-1.25405	-0.918966	-1.21253	-1.15871	-1.44979	-0.861585	-0.805162	-0.779202	-0.796161	-1.58935	-1.06873	-0.963773	-1.15178	-0.823287	-0.237696	-1.34486	-0.970454	-1.724	-1.03923	-1.1266	-0.925995
b0226	dinJ antitoxin of YafQ-DinJ toxin-antitoxin system	0.563604	0.732821	-1.80425	-1.52365	-1.23349	-1.80953	-2.21539	-1.98038	0.354849	-1.7468	-1.53883	-1.37413	-1.95058	-2.11012	-1.8044	-2.15628	-2.44042	-2.35412	-0.981601	-1.85635	-0.913357	-1.63398	-1.54258	-1.60004	-1.47813	-1.7284	-1.6738	-1.20018	-1.13469	-1.17615	-0.342567	-1.14096	-1.47588	-0.582572	-0.841433	-1.7222	-1.78761	-0.817852	-2.53937	-1.34769	-2.74335	0.815072	-2.09571	-1.80488
b0227	yafL predicted lipoprotein and C40 family peptidase	-0.182258	0.554599	-2.43082	-1.98684	-2.17399	-0.429986	-2.91239	0.433137	0.797118	-1.20178	0.51635	1.22322	0.685853	-1.3288	-0.962476	-1.43524	-3.11629	-2.64243	0.730995	-1.3194	1.29065	-3.02365	-0.255758	-1.29484	-0.743712	-2.07022	-1.80521	-0.65835	0.65812	1.81618	1.93991	2.63145	-1.99398	0.0977824	-2.63933	-1.58864	1.789	2.01984	-1.00776	-1.31108	-3.24013	-0.993676	-1.37611	2.66748
b0228	yafM conserved protein	0.296507	0.261773	-7.61432	-4.47827	-1.41081	-1.59457	-5.55777	0.26796	2.14913	-2.40549	2.28625	-1.72496	-3.23225	-0.629621	-0.783914	-0.361714	-6.17388	-4.27479	-4.06268	-3.36177	1.3859	3.35601	-1.05787	2.75485	0.232878	-0.226272	-0.401912	-1.5107	-4.47232	-1.2139	-7.89847	-6.78982	-0.425481	0.555541	-7.59539	-2.82254	-0.54421	-1.11884	-1.46011	-0.606037	-6.3026	-2.48481	0.72753	1.53825
b0229	fhiA	-1.73263	0.920245	0.355485	0.0652713	0.871803	1.85626	-1.47152	0.288173	-0.00263346	1.74781	1.06084	1.71992	0.549083	0.825567	0.752357	0.770562	1.17977	1.41997	1.99223	-0.622018	0.913926	-0.493605	1.3531	0.424732	1.36109	-0.107948	-0.0670539	0.204724	0.763899	1.54199	-0.793691	-1.12826	-0.265182	0.936669	-1.05391	0.994793	-0.655815	1.32824	-0.390062	0.945834	0.30505	1.8842	0.40547	1.79899
b0230	mbhA	-0.0780266	0.696441	-1.42031	-0.91778	-0.0372776	-0.0403086	-3.03828	-1.34341	0.650466	-0.563871	-0.530326	-0.781617	-0.994251	0.0341791	-0.0340027	-0.689676	-1.30641	-1.74883	-0.00845068	-0.861592	-1.78182	-2.24115	0.130912	-2.19622	-0.211732	-0.99471	-1.18809	-2.15279	-0.0457575	-0.512491	-2.02809	LQ	-1.33192	0.0672667	-1.04336	0.272951	-0.155947	-0.115265	-2.21435	-0.109852	-2.07961	-0.422079	-1.48139	-2.77143
b0231	dinB DNA polymerase IV (Y-family DNA polymerase; translesion DNA synthesis)	-0.112831	0.468398	-2.9551	-1.26695	-0.987876	0.123804	0.802098	0.230672	-2.46447	-0.162546	0.852228	-2.21784	0.712574	0.214855	0.264635	-0.253949	-0.176782	0.230655	-2.45965	-4.82868	1.1519	-3.16615	0.775187	-0.799114	1.97119	0.790528	1.11355	0.606647	-1.82286	-0.815564	2.9396	2.78882	-1.33995	-1.07594	-3.68709	1.00634	0.00956874	0.470439	2.40408	-0.953645	-4.8133	1.2768	-2.82707	-2.4974
b0232	yafN conserved hypothetical protein with a possible role in spontaneous mutagenesis	0.749111	0.637313	-0.325395	-1.30187	-0.693718	-0.78871	-1.11686	-0.161092	0.74789	-1.38259	1.74826	-0.027285	0.775678	-0.17508	-0.183716	0.10028	0.310974	0.295949	1.38916	-2.02532	0.79816	1.12787	0.202337	-0.0505149	0.259635	0.951308	0.845257	-0.487006	0.00438656	1.68287	-2.01686	-1.57846	0.19731	-0.0900813	0.58143	0.180632	-1.45831	0.212872	-0.221645	0.521022	-2.11211	-1.03829	-0.309846	-1.58395
b0233	yafO conserved protein with a possible role in spontaneous mutagenesis; toxin of a putative toxin-antitoxin pair	2.42121	0.388632	-0.0719308	-1.77119	-0.679673	-2.49311	-0.0147498	0.101118	-1.78679	-7.1475	2.12945	1.71937	0.842002	-0.631912	-0.576022	0.901561	2.13724	1.37065	0.183389	-4.2687	-0.489232	0.749102	-0.879655	-0.675701	0.83414	0.871682	-0.0919671	0.374691	0.438103	-1.43749	2.61763	0.884085	2.02716	-0.375841	0.784904	-0.898121	-2.2855	0.0552149	1.1407	1.38532	1.97959	0.201027	1.99352	-2.47003
b0234	yafP predicted acyltransferase with acyl-CoA N-acyltransferase domain	1.66975	0.318957	0.833926	-5.34412	-0.545078	-5.42674	-3.60586	-5.56647	-1.81542	-5.0353	1.43351	-3.2625	1.81344	-4.21637	-4.20121	-0.00577326	-4.86993	-4.78183	-3.80747	-4.27679	-1.67134	-4.43235	-3.33525	-4.69265	-3.60478	-4.3996	-4.41617	-0.429623	-3.77462	-2.70707	-7.18062	-6.4613	0.497099	-4.93119	0.739672	-4.73752	-4.82052	-2.30775	-5.69764	-3.47807	-5.36034	-1.47223	-4.49179	-2.25166
b0235	ykfJ	1.748	0.220818	-0.959723	1.16121	-4.89963	-2.22563	2.12973	-0.00701493	-7.6111	-13.4027	-1.28093	5.7502	-1.32874	2.18187	2.46372	-1.54899	-6.22494	-6.22026	1.48472	3.48241	-1.36377	1.57383	1.03197	0.847668	2.06067	3.35297	4.77255	-2.66425	5.12024	7.50573	1.75188	2.20724	-6.26472	-0.470287	-3.20205	4.61153	6.95153	7.23553	0.800818	1.6	-9.78569	-1.55554	2.36935	-3.02346
b0236	prfH	0.147028	0.449719	0.174617	LQ	-0.191757	LQ	-0.531604	LQ	-0.584995	-1.51714	0.283218	LQ	-0.399757	-1.77641	LQ	0.0399277	-0.593217	LQ	-0.34688	-0.507779	-1.18167	LQ	-0.282669	-0.0920866	-1.73883	-1.70689	-0.736796	0.180663	-1.20171	-1.12917	-5.28151	LQ	-1.68894	-1.33679	-0.886259	LQ	LQ	LQ	-2.92828	-0.874377	-4.03452	-0.98918	LQ	0.614331
b0238	gpt xanthine phosphoribosyltransferase [multifunctional]	-0.602108	0.361349	-0.428155	-0.105644	-2.34728	-0.44082	-4.14369	2.27899	0.0622151	1.28035	0.84676	-0.549022	2.32914	0.638559	1.10573	1.17899	-0.195197	-0.0391251	-0.585433	-4.12778	-2.59384	-1.4552	-0.50969	-1.48885	-0.0945164	-1.09207	-0.332311	0.893979	-1.05552	-0.572161	-3.99683	-3.72987	-1.46237	-3.34984	0.432887	-1.37759	2.31532	1.64893	-2.69716	-0.963211	-2.93518	-0.944097	-2.22201	-1.06681
b0239	frsA fermentation/respiration switch protein	0.303617	0.490384	-1.71281	-2.1064	-1.31401	1.13321	-5.92964	-3.56231	-0.920821	-0.408145	-0.346954	0.579538	-1.23307	0.860056	1.02799	-2.09799	-0.594907	-0.662149	0.0788827	-2.17838	-1.36217	-0.902711	-0.348384	-0.759482	-0.137147	-2.27463	-1.56258	-0.589574	-0.321795	1.15884	-0.658711	0.255052	-1.33784	-1.6745	-2.87195	-1.37691	0.328439	0.126139	-0.239096	-1.14062	-2.50797	1.06626	-3.52273	-1.25339
b0240	crl Crl transcriptional regulator	1.78113	0.446015	-4.94064	-2.47576	-2.76442	-1.08112	-0.799002	-2.92473	-4.46426	-2.39663	-1.84299	-5.22629	-2.04723	-0.736026	-0.949329	-1.78035	-2.12248	-1.72799	-1.93105	-1.68019	-6.02361	-3.42209	-1.91937	-0.121836	-2.93484	-1.52285	-0.937008	-2.5292	-3.16106	-1.51926	0.386121	1.01331	-3.07691	-1.40519	-3.29769	-0.119064	1.3071	-2.87749	-1.90336	-3.15962	0.991283	-2.55507	-0.853368	-2.42737
b0241	phoE outer membrane pore protein E	2.93735	0.554222	-1.28145	-1.21941	-0.893485	-0.30889	-0.65051	0.100722	-4.27637	-3.47126	0.34161	-1.25684	0.860546	0.0153587	-0.0302266	0.658192	-0.0144058	-0.109862	-0.672594	0.244347	0.0978857	-1.14944	-0.335935	0.0879442	-0.509701	0.652659	0.529823	0.862896	-0.0616105	-0.713891	1.77659	1.98724	0.649114	-0.380825	-0.58971	0.490966	1.55835	-0.82763	-0.301848	-0.586921	1.0886	-0.944103	0.995553	0.359892
b0242	proB gamma;-glutamyl kinase-GP-reductase multienzyme complex	0.207046	0.349358	-1.27843	0.211049	1.19893	-0.0754983	-4.85418	1.51736	-3.1	-0.875205	-0.0667764	4.36744	1.77424	1.37639	2.17572	1.1493	-1.48953	0.458179	1.50708	-4.96223	4.04005	-0.769285	1.43659	-0.497244	0.32155	0.0924948	1.60909	1.9074	-1.63146	1.2339	-0.116157	2.05466	1.75105	2.6194	0.134753	1.47898	-4.71912	1.19702	2.51526	0.255757	0.601034	3.68562	0.89175	2.58877
b0243	proA gamma;-glutamyl kinase-GP-reductase multienzyme complex	-0.329146	0.353625	-0.151532	-1.46889	-0.865847	-0.13708	-0.568058	1.75482	-1.97623	-1.58448	-1.09515	-2.3921	0.10258	-1.29803	-0.662162	0.357917	-2.06137	-1.07438	-3.70536	-6.43039	-1.15104	-2.56321	1.16699	1.97408	-0.287737	-1.65923	-1.14674	-1.15932	-0.176009	-1.44872	-5.85832	-6.72881	-1.7549	-1.09881	-1.68928	0.270642	-5.20495	1.55016	-2.49766	1.66042	-5.34953	0.882878	-3.9665	-3.47169
b0245	ykfI toxin of the YkfI-YafW toxin-antitoxin pair	0.988226	0.514588	-0.451902	-1.01873	-2.56622	-1.49908	-3.02245	LQ	-2.64816	-1.3671	-0.30501	0.225906	-2.34623	-1.1629	-1.4066	-1.49787	-3.95485	-2.53831	-2.46383	-3.49233	-4.18348	-1.4487	-1.35887	-1.42214	-2.17466	-1.19889	-1.15755	-1.8842	-0.33529	-0.599264	-5.45396	-4.37157	-2.42067	-2.90556	-2.86823	-2.1768	-0.562414	-0.498847	-1.30793	-1.56474	-4.17556	-0.347538	-1.87869	-4.42566
b0246	yafW antitoxin of the YkfI-YafW toxin-antitoxin pair	0.695501	0.343954	-3.26991	-0.489612	-3.26234	-0.922378	1.34475	-3.04053	-3.63337	-0.94988	-0.717187	-1.1771	-1.93711	-0.9025	-1.20979	-0.497608	-3.45287	-3.6369	-2.17015	-3.71787	-2.65701	-1.94694	-0.951709	-3.21088	-0.977987	-2.38992	-2.00515	-2.77272	-0.156267	-0.895368	-6.12258	LQ	-3.90246	-2.09237	-5.19878	-2.24815	1.11313	-0.0228167	-2.86833	-0.505071	-4.41599	1.25	-4.56335	-3.54597
b0247	ykfG CP4-6 prophage; predicted DNA repair protein	0.505348	0.271758	0.118026	-3.84535	-5.25994	-0.702505	-5.18681	-6.49193	-7.30323	-2.19973	-2.22385	-1.75229	-2.99298	-4.85099	-3.80927	-4.2857	-7.83972	-7.47107	-7.59963	-7.92096	-5.43722	-8.49286	-2.35951	-6.84813	-4.29072	-2.14412	-1.21208	-4.15248	-4.44921	-2.0306	-12.0947	-10.8886	-5.23724	-7.15299	-7.45062	-2.75826	-8.13225	-1.98427	-8.01489	-4.4394	-4.88534	1.91721	-6.76678	-4.37254
b0248	yafX CP4-6 prophage; predicted protein	1.44059	0.390483	1.05545	-1.72123	0.0222421	-1.68358	-7.55791	-5.22061	-2.77178	0.31696	-2.14414	0.448242	-1.15557	-0.893901	-0.815035	-3.57	-3.8033	-3.22029	-5.57098	-3.41598	-7.70155	-7.34861	0.135413	-2.16619	0.0540289	0.826939	0.900799	-2.92243	-2.50248	-1.07567	-8.68649	-7.23374	0.440472	0.8895	-1.54122	-2.39614	-8.1903	-0.810196	-0.692205	-1.53756	-5.1217	0.481785	-7.57902	-1.95404
b0249	ykfF CP4-6 prophage; predicted protein	-0.23425	0.317741	2.69273	-0.673219	-1.82998	0.542083	-3.87817	-0.292872	-3.1341	0.645168	0.342568	1.05316	-0.424541	0.523543	0.499437	0.883315	-2.51663	-1.52434	-0.858394	0.873209	-0.32789	-2.34347	2.15403	1.2409	-0.0921453	0.472131	1.58476	-1.04027	-0.193539	-1.02493	-1.94189	-1.16905	-1.26497	-1.88919	-4.4075	0.546393	-3.41253	0.747222	-1.51196	3.14258	-1.98346	3.97373	LQ	-3.23102
b0250	ykfB CP4-6 prophage; predicted protein	1.67411	0.867107	-1.18703	-0.962857	-0.845189	-0.179385	-4.24178	-0.594778	-2.24943	-0.584354	-0.789304	1.24766	-0.96139	-1.1551	-1.12918	-1.73612	-2.65892	-2.3984	-1.64763	0.353685	0.950772	-0.0669521	0.0828806	-1.28209	0.0024639	-1.31859	-1.2724	0.114433	-0.582939	-2.91575	1.33053	1.19086	-1.56651	-1.1852	-1.10907	0.503273	-3.59539	-1.28902	-0.657063	-1.11596	0.436652	0.171009	-0.606952	-3.62005
b0251	yafY CP4-6 prophage; inner membrane lipoprotein	0.0880162	0.691233	0.391046	-1.67224	-1.08283	-0.400972	-3.23479	-0.776358	0.203733	0.192428	-0.926849	-1.72318	-0.0326355	-1.39153	-1.01194	-0.308989	-1.74009	-1.11462	-1.05425	-0.64015	-3.05385	0.24465	0.596166	-0.771571	-0.692673	-1.55316	-1.30872	-1.26303	-1.04654	-0.825097	-2.92977	-2.18795	-1.80694	-0.350617	-0.357966	0.300287	-2.75036	0.0128163	-1.90322	-0.819225	-1.0989	-0.862622	-1.03233	-1.61479
b0252	yafZ CP4-6 prophage; conserved protein	0.137037	0.670936	0.0469979	-0.810642	0.179164	2.05009	0.000667633	0.438614	-2.24345	1.67536	0.116112	-0.260183	0.572259	0.342928	0.466273	0.629823	-2.82193	-2.88944	2.02181	-0.537272	0.456341	-1.10458	0.953172	1.34496	1.33072	0.189378	0.202864	-0.311646	0.514484	-0.0699786	-3.09612	-3.67029	0.18933	0.306823	-2.48889	1.20797	-2.96763	0.816961	0.938726	0.39146	-1.00063	2.0682	0.863904	2.1089
b0253	ykfA CP4-6 prophage; predicted GTP-binding protein	-0.272087	0.420618	0.732127	0.409351	-0.904874	0.92026	0.703623	-0.139213	-0.398812	2.12288	-0.157824	-0.0917574	0.926038	0.695429	1.08315	0.683489	-0.866993	-0.358211	-0.943676	-0.369595	2.18166	-0.739017	1.9274	2.0232	0.543629	0.538892	0.974165	-0.375913	0.01411	1.16642	-1.11009	-0.273321	-1.51958	-0.408344	-2.86718	1.7598	-1.88711	1.59539	-0.970459	0.174991	-2.24644	3.90882	-0.490654	-2.10464
b0254	perR PerR transcriptional regulator	1.25321	0.693045	-2.73613	-1.26534	-0.594612	LQ	-0.0443179	LQ	-1.30967	-1.0898	-0.273456	-0.140947	-0.377508	-1.07471	-1.31249	-0.525559	0.852714	0.368736	-0.592394	0.858758	-3.43503	0.610504	-1.64154	0.31826	-0.787794	0.0270244	-0.404655	-1.91251	-0.963413	-0.940124	1.84774	1.12967	0.561877	0.850153	0.0277475	-0.958035	-2.04808	-0.529505	1.01997	0.017356	0.44409	-2.64459	1.51615	-0.557166
b0255	insN-1 CP4-6 prophage; partial regulator of insertion element IS911A	1.47709	0.498395	-2.57461	-2.84231	-2.93434	-0.0265752	-3.72085	-1.9699	0.200652	-1.13432	-1.52296	-2.14305	-0.843969	-2.4491	-2.72149	-3.14016	-3.12789	-2.979	1.20613	-0.926273	-3.08366	-1.92037	-0.460619	-2.02507	-1.62625	-1.57969	-1.77484	-2.65258	-2.41625	0.409949	-4.69723	-3.98689	-3.50425	-0.349952	-2.98034	-1.02246	-2.50462	-1.18584	0.638742	1.62922	-2.71941	-0.106374	-2.01116	-0.873923
b0256	insI-1 transposase of IS30	1.82326	0.235747	-4.0665	-2.44871	-5.50929	-4.28306	-9.41049	-3.49676	-2.54912	-10.5664	-2.12887	-1.36309	-1.70047	-2.58199	-4.06506	-2.10876	-0.800985	-2.43184	-3.02623	-1.11534	-1.77389	-2.17165	-2.25461	-1.41137	-4.15108	-0.522327	-2.12835	-1.59779	-0.223588	-5.99076	-2.23599	-3.83909	-1.08502	-2.52273	-4.77539	-2.65444	1.35166	-4.21258	-2.17082	-2.58146	-4.51447	-3.03061	1.74711	0.635908
b0257	insO-1 CP4-6 prophage; partial transposase of insertion element IS911A, interrupted by insertion of IS30 element	1.10571	0.526817	0.815194	-3.24378	LQ	-0.814428	-3.85157	-3.2752	LQ	-0.544844	-0.175779	-1.24453	-0.863732	-0.184804	-0.155132	-0.471449	-3.41043	-2.99661	-2.43695	-3.80546	0.197724	-2.31156	-0.228241	-1.34223	-0.544423	-0.542792	-0.35347	LQ	1.27252	0.769547	-5.29126	-4.81231	LQ	-2.64013	LQ	-1.90352	0.570766	-0.403384	-0.100096	-0.637133	2.1539	0.811756	-3.77747	-1.85845
b0258	ykfC CP4-6 prophage; conserved protein	-0.105737	0.535843	-1.28811	-2.36878	-0.313523	-0.71947	-3.63608	-0.932109	-2.29322	0.163747	-0.700604	-2.02577	-0.512301	-0.0676191	-0.0517094	-0.886244	-0.901026	-0.767016	0.189205	-1.96592	0.0246257	-2.82438	-0.31058	1.33623	-0.254812	0.143654	0.261545	0.598238	-1.13204	-0.453047	-0.012839	0.932905	-0.996149	0.785801	-0.181179	-0.0468917	0.727485	0.0270373	-0.120373	-0.590566	-2.70576	-1.5997	0.199321	1.44168
b0259	insH-1 IS5 transposase and trans-activator	0.578471	0.338949	-0.627579	-1.61047	-1.65567	-1.19248	0.415689	-2.40261	-3.76754	-3.4885	-1.70494	0.0199309	-1.23366	2.37009	1.56221	-0.216211	2.58702	1.82292	1.02724	0.131319	1.67777	-0.316499	0.611771	0.361755	-1.93036	0.777421	1.05706	-1.05622	1.441	-0.311838	0.169207	-0.376115	-1.01552	-0.57312	-1.11472	-0.285136	0.12213	-0.266262	1.03615	-0.566358	0.85591	-0.371865	-0.295397	1.21265
b0260	mmuP MmuP APC transporter	-1.08394	0.675799	0.569813	0.862215	1.9131	2.04349	-0.314886	-1.62862	1.0478	1.34611	1.29755	0.671621	0.845547	1.50032	1.80499	1.75316	-2.07109	-1.46383	-0.0514262	-1.63357	0.00118981	2.76016	2.84323	-0.175771	0.953739	0.939926	1.37439	0.0248533	3.24965	0.633062	-2.99288	-2.65384	0.126775	2.54765	2.39281	1.45779	-1.0409	0.914458	0.859522	1.14268	-0.431799	0.614156	-1.97382	-2.19127
b0261	mmuM homocysteine methyltransferase	-1.02737	0.395325	1.30723	4.93381	1.87666	2.04803	-3.21437	-0.97617	-1.2447	3.45052	3.55951	4.91016	2.82965	3.10479	3.58479	-2.42351	2.09112	2.78762	1.55909	5.01191	-0.437299	-3.39335	2.88118	5.22124	4.44324	2.14033	2.77856	-0.47395	4.34702	0.478915	-4.76283	-6.22422	2.35218	4.15615	3.23656	0.217229	-1.29686	1.69297	4.70723	3.63431	8.9232	1.3257	0.678148	1.74745
b0262	afuC CP4-6 prophage; predicted ferric transporter subunit/ATP-binding component of ABC superfamily	-0.600439	0.723635	1.5846	0.0820296	0.832807	0.177809	-2.89245	-0.283182	1.0719	0.487935	0.603316	-0.537883	0.901224	1.42015	1.59594	-0.480386	-1.63071	-0.936558	-0.387466	1.97313	-0.415215	-1.19209	0.783348	-1.39645	0.762796	-0.223803	0.064818	-0.114455	-0.63773	-0.745321	-2.70507	-2.34712	-0.217787	2.31176	0.183819	-0.223655	-0.109117	-0.196283	-2.34651	-0.85653	-1.39566	-0.951312	-0.926994	2.57035
b0263	afuB AfuB	-0.253323	0.554551	-0.00259492	-0.429261	-1.09427	-0.0689342	-2.14216	-0.00444862	-0.00410644	-0.0867237	0.63159	-0.117491	0.382058	-0.172051	0.388581	-1.14619	-1.61395	-0.552561	-0.588176	-1.86792	-1.21015	-1.1617	0.403936	0.142626	0.506449	-0.740901	0.267998	-0.911248	0.731985	-0.601401	-1.71895	-0.915925	-0.304195	-0.204204	-1.42799	-0.164796	-1.67725	0.399406	-1.50995	0.634234	-1.55574	-0.522001	-1.48167	0.934572
b0264	insB-2 IS1 protein InsB	-0.0581618	0.493045	-0.392581	1.30412	1.25717	1.48133	0.011127	2.23737	-0.71403	0.772028	1.48339	3.24216	1.71639	3.11429	3.64279	1.33892	3.02668	3.61146	1.58569	3.99766	1.72113	2.4772	2.36494	1.54519	2.42551	1.53896	2.33112	2.25287	0.344078	0.806467	3.11483	3.29304	1.31332	1.67882	2.19594	2.17798	4.07418	-0.0361446	1.49437	1.89248	2.56247	1.31622	2.69964	0.474627
b0265	insA-2 IS1 protein InsA	0.16402	0.357455	-1.31412	LQ	-0.85932	LQ	-1.11138	LQ	-0.363651	-1.40273	-0.241537	1.57558	-0.971329	1.07766	LQ	-0.854313	-1.15774	LQ	-0.626311	1.94734	-1.22432	-0.277904	1.45541	-0.260648	-0.63289	0.214246	LQ	-0.402652	3.66023	1.83997	-2.72832	LQ	-0.652309	-1.23601	0.583661	1.02121	1.56691	2.15836	0.785946	1.72998	-1.32478	1.48155	0.0439175	1.6017
b0266	yagB CP4-6 prophage; conserved protein	0.885134	0.440024	-0.651593	-0.807916	-2.02852	-1.64327	-4.87275	-2.3649	-2.16805	-2.49786	-0.27932	-2.29314	-0.588438	-1.092	-1.24179	-0.86634	0.0623815	-0.417988	-0.344644	-4.54387	0.542608	-1.91978	-0.645229	-1.30404	-1.30607	-0.681824	-0.903153	-2.24363	-2.0017	-0.268112	-5.67178	-4.43653	-2.79201	-0.699198	-0.177925	-2.38185	-3.77611	-1.62457	-0.304327	-1.82383	-4.67201	-0.667366	-3.25307	0.70054
b0267	yagA CP4-6 prophage; predicted DNA-binding transcriptional regulator	-0.641446	0.794065	-0.334028	-0.558981	-0.379533	0.120726	-1.31577	0.28777	-1.14303	0.195954	0.275427	0.400355	0.199037	0.980823	1.01668	-0.822043	-0.873744	-0.448852	-0.474211	-0.71336	-1.1569	-0.46709	1.03549	-0.104723	0.550587	-0.43378	-0.196723	-0.293242	-0.298438	0.565603	-1.13217	-1.04864	-1.58151	-1.26025	-0.320769	-0.424331	-2.17909	0.893189	0.0927346	0.448639	-1.43833	-0.40349	-0.83557	1.73247
b0268	yagE CP4-6 prophage; predicted lyase/synthase	-1.00662	0.592388	0.291081	-1.2273	-0.389715	0.687016	-1.9332	-0.316716	-0.86764	2.44972	0.628826	-0.00884965	1.07799	0.746074	0.820239	0.419751	-0.378424	0.0505637	-1.44337	-3.56318	0.743559	-2.15755	0.491091	-1.46945	-0.0954869	-1.77391	-0.625427	-0.634921	-1.12884	-0.582403	-2.1622	-1.42724	-1.45724	0.235487	-0.157592	-0.747792	-3.81025	0.795124	-1.9296	-0.563872	1.11451	2.10382	-0.821509	0.988595
b0273	argF ornithine carbamoyltransferase	-0.679233	0.485427	-1.64961	-0.540737	-0.764323	0.196668	2.7082	-1.166	-1.40484	4.02095	0.643513	0.580607	0.29911	0.446812	0.865972	1.39597	-2.76308	-1.38685	1.83572	-1.13501	-3.16274	-1.26541	0.690756	-1.17657	0.821372	-0.471153	-0.222252	-1.25231	-0.864461	-0.43492	-0.532988	0.487059	-1.76561	1.12538	-1.42004	0.219901	-2.07956	1.54187	-1.65112	-0.301962	-0.247243	-0.200228	-1.79233	-1.60268
b0274	insB-3 IS1 protein InsB	-0.0880906	0.46015	-0.476609	1.29521	1.26196	1.57292	-0.150791	2.14324	-0.827565	0.840119	1.52939	3.49386	1.77191	3.18218	3.56298	1.34343	3.26424	3.68752	1.66484	4.25241	1.61455	2.58717	2.41394	1.66314	2.47583	1.65489	2.52661	2.2855	0.658584	1.02963	3.09526	3.28605	1.09402	1.76861	2.19777	2.22932	4.28587	0.364178	1.59773	2.11058	2.65236	1.40792	2.84129	0.50835
b0275	insA-3 IS1 protein InsA	0.220711	0.321818	-1.60876	LQ	-1.08413	LQ	-1.35222	LQ	-0.36833	LQ	-0.485945	1.50994	-1.25665	0.998355	LQ	-0.968351	-1.38365	LQ	-1.09398	1.72744	-1.21493	-0.695839	1.43298	LQ	-0.958947	-0.191158	LQ	-0.537284	3.86736	1.97117	-3.06904	LQ	-0.849706	-1.37297	0.636397	1.19451	1.15503	2.33492	0.516278	1.4071	-2.39894	1.95888	-0.0635232	1.91964
b0276	yagJ CP4-6 prophage; predicted protein	1.91193	0.642149	-3.06323	-2.86908	-1.54276	-1.66515	-4.93549	-2.8114	-2.80043	-3.06038	-1.88125	-2.0083	-1.49962	-1.09267	-1.1344	-3.24086	-1.30639	-1.12636	-0.78872	-1.32315	-2.21822	-1.97806	-1.19255	-0.431871	-1.6224	-1.54877	-1.72452	-0.575148	-0.630219	-3.16559	1.41438	1.12244	-1.84114	-0.813922	-0.275396	-1.28538	-1.46368	-1.89379	-0.804361	-1.67003	-2.75108	-2.43098	-2.04636	-0.90299
b0277	yagK CP4-6 prophage; conserved protein	2.77633	0.399449	-2.45675	-2.1443	-2.79582	-3.40128	-1.65266	-0.892458	-4.80999	-6.6564	-0.333137	-0.439224	-1.0303	-1.30143	-1.91233	-0.68787	0.928191	0.132738	-1.94821	-1.98958	-0.455521	0.223807	-2.08568	-1.74076	-0.0509585	-1.28824	-2.14948	-0.876658	-1.61148	-1.62949	2.30828	1.39156	0.0669963	-0.79277	-0.647804	-1.16924	0.343923	-2.47585	-0.276459	-0.276489	-0.755343	-0.555959	0.532054	1.41128
b0278	yagL CP4-6 prophage; DNA-binding protein	2.51895	0.536904	-3.00968	LQ	-1.06383	LQ	-2.82309	LQ	-1.69639	-3.91138	1.18398	-1.39843	1.63196	0.238439	-0.958044	-0.597947	1.74421	0.728628	-1.11615	1.66686	-1.47141	1.92631	-0.538493	1.65904	-1.32514	-0.202891	-0.915731	2.37901	0.453417	-1.32191	3.27713	2.871	0.453141	1.20371	1.02314	1.87566	1.40135	-2.10698	2.09634	-1.1834	2.92394	-1.67123	2.46241	0.816841
b0279	yagM CP4-6 prophage; predicted protein	2.2426	0.739761	-2.41641	-0.937449	-1.86761	-0.981671	-3.96787	0.244601	-0.968552	-2.63277	0.230624	-3.17727	0.0570814	-0.753646	-0.92789	-0.405803	1.19881	0.669713	-1.0949	1.2837	-0.715893	0.691439	-1.09696	1.08996	-1.75599	-0.698777	-0.908019	1.65907	-0.456459	-2.28764	2.50079	1.70779	-0.0732756	-0.260281	0.566767	1.07618	1.44273	-1.81816	1.19912	-1.20707	2.25345	-1.58119	1.59165	0.593919
b0280	yagN CP4-6 prophage; predicted protein	1.60344	0.571623	-1.40701	0.0620416	-0.109711	-2.54008	-4.88403	LQ	-0.357774	-3.87614	-0.0859639	1.09934	-1.02379	-0.81	-1.04518	-0.626445	1.69765	0.835091	1.15767	0.248648	-4.69353	4.28752	-0.704265	1.94884	2.05576	1.14436	0.834109	-0.0972616	1.52631	-1.30942	2.53103	1.85058	1.65292	2.75469	0.313687	1.85852	2.29668	-0.893893	2.95004	1.45758	3.17807	-3.43126	2.0938	0.668793
b0281	intF CP4-6 prophage; predicted phage integrase	0.862114	0.464709	-3.29091	-1.90667	0.556679	-1.36025	-5.98794	LQ	-0.638842	-2.68763	1.6594	0.0348119	-0.533765	-1.39476	-1.76516	-0.474859	1.2228	1.2059	-1.42048	-3.28958	-0.489063	2.28014	-1.00838	-0.66263	0.040303	0.592679	0.174631	1.74146	-0.0950449	-0.620552	4.71435	4.30131	2.59399	2.51815	1.55565	1.35826	1.9906	-2.45667	-1.69116	-0.60795	1.35235	-2.2319	2.36269	0.78809
b0282	yagP predicted transcriptional regulator LYSR-type	-0.778551	0.510866	1.39111	0.298753	-0.417591	0.345828	-1.8581	-0.549076	0.208211	1.86924	-0.794392	0.404547	-1.13102	0.0584152	0.202458	-0.817375	-2.06746	-1.60079	-0.253016	3.45202	-2.24261	-1.35706	1.1072	-0.275322	0.0662665	0.868071	0.867277	-0.615772	0.144617	0.395006	-1.46236	-0.3977	0.159664	2.09382	-1.85956	1.3366	-2.11263	1.85961	0.679052	2.7797	-2.0657	1.45763	-0.0443725	0.56625
b0283	yagQ conserved protein	-0.192664	0.93983	0.15608	0.548921	-0.921444	-0.214373	-2.83747	-1.2463	-0.891956	-0.308461	-0.335271	2.06903	-0.415544	-0.320879	-0.21818	-0.917132	-2.41877	-1.84014	1.05487	-2.23997	-2.11998	-0.759842	0.539151	-0.48555	0.588097	-0.836257	-0.48831	-0.296835	-1.6191	0.589188	-1.93493	-1.45415	-0.437406	-1.16704	-2.19194	-1.21558	-2.91682	-0.0106968	-1.81404	-1.37877	-2.88402	-1.0653	-1.12408	-0.671014
b0284	yagR putative molybdenum cofactor-binding oxidoreductase	-0.804167	0.4359	0.837692	-0.359801	-1.11528	1.20987	-2.44142	0.322825	-0.944877	1.28784	0.431225	1.46603	0.815067	1.34253	1.33824	-0.469613	0.454671	0.67097	0.636019	-2.35069	0.513264	-1.36162	1.85099	-2.25621	0.227092	0.378117	0.898023	-1.32044	0.908002	1.91428	1.32174	1.8825	-1.82739	-0.330899	-0.12316	-0.108881	-1.23433	2.3334	-1.30121	0.605811	-2.88131	0.459927	-1.2666	-0.919849
b0285	yagS putative oxidoreductase, FAD-binding domain	-1.0168	0.658452	0.423424	1.07814	0.7466	0.930497	-1.45609	0.954576	-0.469242	2.71404	1.51229	0.739811	1.11073	0.880912	1.36949	-0.0667901	-0.123755	0.456531	1.80334	-0.25563	0.209249	-0.822371	1.98219	1.43469	1.51212	0.519086	0.973854	0.368366	1.05896	0.946051	0.753654	1.47284	-0.301977	1.74371	0.689099	0.425478	-0.554818	1.44366	2.54544	1.92083	-0.639617	0.466974	0.0788162	1.20865
b0286	yagT putative oxidoreductase, Fe-S subunit	1.25653	0.636901	-2.18991	-0.811315	-1.33979	-1.31749	-1.46499	-1.84528	-0.758862	-1.62878	-1.45366	-0.165844	-1.16186	-0.950424	-0.581399	-0.709671	-1.12655	-0.918038	-0.505019	0.0209202	-1.97055	-1.47286	-0.852571	-0.762373	-1.3279	-0.645833	-0.42572	-1.13013	-1.06451	-1.82279	-3.69012	-2.50445	-1.12175	-2.11229	-0.313269	-0.954527	-2.69598	-1.65715	0.0251394	-1.41147	-0.909322	-0.490082	-0.618805	-0.803815
b0287	yagU conserved inner membrane protein	3.00578	0.391358	-4.70871	-2.70293	-1.97718	-0.353927	-2.75612	0.46598	3.44164	-0.951191	-0.229053	-0.0747648	0.489607	-0.248366	-0.286515	-0.082077	0.503999	0.0407159	-1.57275	-0.587906	-0.406177	0.751535	0.915751	0.615614	0.849367	-0.68843	-1.59438	1.66121	0.695153	-1.86092	3.042	2.78708	-1.13093	-0.118309	-0.461913	0.850243	1.61586	-0.619629	0.413288	0.863184	2.14814	1.25333	0.439279	1.54515
b0288	ykgJ predicted ferredoxin	2.63315	0.769076	-3.89272	-0.511689	-0.950759	-1.58156	-4.37255	-0.810572	-1.35959	-0.587043	-0.455852	-2.40332	-0.0412023	-1.31733	-1.61139	-2.25199	-0.0238283	-0.10248	0.0625584	-0.99611	-1.69291	-0.300606	-0.820591	-0.710476	-2.15565	-1.38132	-1.28487	-0.0477608	-0.53322	-2.79698	0.221989	LQ	-0.468742	-1.78582	-1.1815	-0.900999	-0.626503	-2.08192	-1.33017	-1.08751	-0.674504	1.1863	-1.22213	0.179095
b0289	yagV conserved protein	0.797539	0.63705	-2.46749	0.117713	-1.22039	-0.489009	-4.20109	-1.31079	-2.2638	-0.745372	-0.461791	-0.511486	-0.612941	-0.800982	-0.509121	-1.44133	0.0425753	0.552976	-0.741757	-0.139571	-2.11473	-1.2437	-0.15154	0.870791	-0.120096	-0.849438	-0.570859	-0.715408	0.145245	-2.01058	0.162894	0.662474	-1.09903	-1.09736	-1.45064	0.506592	0.156261	-1.66085	-0.556873	-2.8092	1.34601	-2.1063	-1.36045	0.0537583
b0290	yagW predicted receptor	-0.3061	0.40877	-1.5951	0.309949	-0.355499	-0.0458428	-0.78777	2.87966	-1.44539	0.777191	1.01174	-0.689566	0.88266	0.815701	1.13106	2.94943	-1.02367	-0.65809	-0.12667	5.3355	4.22958	1.85751	1.19517	2.44738	2.03183	1.24528	2.34227	5.544	5.58787	4.16974	4.41882	7.40179	-0.888051	-1.91813	-0.456464	1.04104	-2.98018	0.593256	-3.06043	1.14761	8.27746	1.46312	-0.0340346	6.91946
b0291	yagX predicted aromatic compound dioxygenase	0.138399	0.365553	-2.76078	-1.34112	-2.30054	-1.54786	-8.62922	-2.43925	-2.52976	-0.950771	-0.141861	-3.28854	-1.13057	-1.29605	-1.1307	-2.36337	-0.880245	-0.725779	-4.51996	-1.33847	0.0504038	-1.97728	-0.1441	-2.10891	-1.11446	-0.641036	-0.221814	-1.48761	-2.54896	-2.27968	-2.24783	-1.66338	-2.32509	-0.223839	-3.79703	-1.07717	-3.26049	0.724642	0.765101	-1.11869	-1.97739	-3.36017	-1.58032	-0.361773
b0292	matC predicted protein	0.0227769	0.439302	1.46605	-0.475017	0.52387	0.926478	-4.27791	-0.528879	-3.09986	-1.65961	-0.670925	-0.285173	0.291613	0.0885582	0.333414	-0.173651	-0.389733	-0.13207	-0.833803	2.00038	-3.37833	-0.0658625	2.58806	-2.69025	1.67018	-0.74074	-0.237753	-0.639217	1.45765	2.93856	-3.78151	-2.6287	-0.0892629	-0.262737	1.35131	0.000382144	-4.2085	1.76893	-3.23054	-2.11578	-2.09469	-1.26954	-3.38563	-1.63283
b0293	matB conserved fimbrillin	0.742982	0.465684	-2.11863	-3.38461	-1.26002	-0.387625	-3.66233	-0.0699289	-3.94389	-3.81999	-0.145115	-1.61248	-0.583688	0.306718	0.00611243	0.4707	-0.250148	-0.461383	-2.23648	3.64272	-2.5806	-2.53097	-0.998047	-1.20232	-0.687149	0.303216	-0.0531209	-1.34229	-1.61702	-0.100493	-3.65069	-2.40107	-1.64391	-0.0114828	-0.359834	-1.34673	-3.87202	0.158366	-1.31089	-1.01215	0.77051	-1.10198	-3.56813	0.12708
b0294	matA predicted regulator	2.50349	0.680638	-2.8643	LQ	-1.73197	LQ	-3.59275	LQ	-2.44293	-3.40151	-0.012508	-3.15201	0.0139793	-0.577563	-0.766786	-1.25141	-0.814283	LQ	-0.527461	-0.312374	-0.379155	-0.80331	-0.510656	-1.52221	-1.66535	-0.327857	-1.23832	0.128849	-0.948729	-1.86982	1.59655	LQ	-0.34417	-1.09985	-1.00886	-0.559142	-1.09528	-2.11728	-1.14016	-0.509725	-0.894562	-1.40665	1.07779	0.144697
b0295	ykgL predicted protein	1.87307	0.428268	-3.31887	-5.5631	-4.30963	-4.33297	-6.02921	-1.36448	-4.31275	-7.74635	-4.57345	1.70114	-2.40161	-0.802008	-1.76639	-3.91021	-1.5827	-3.00527	-0.917675	1.30888	-3.24627	2.01361	-2.75385	0.727585	-2.51001	1.36695	0.747514	-3.16224	2.31993	0.987363	3.44329	1.80881	-3.75275	0.272095	-2.98668	-0.627333	2.42613	-4.91994	2.40614	-4.12082	3.47827	-5.20297	2.15135	-3.15531
b0296	ykgM predicted ribosomal protein	1.64583	0.515653	-4.3142	-3.12921	-3.38431	-3.19993	-4.15101	LQ	-3.75203	-3.01799	-2.66142	-3.0124	-1.0948	-2.57739	-2.78748	-2.81127	-1.59234	-2.27895	-2.9805	-4.47526	0.0977538	-1.96068	-2.79506	-2.08495	-2.58598	-2.46213	-2.1036	-1.87635	-2.60475	-2.54684	-0.907132	LQ	-2.67846	-2.85069	-2.14415	-2.81101	-4.08004	-2.83924	-2.98352	-3.00942	-4.05888	-3.27744	-1.14754	-3.16871
b0297	eaeH	2.68457	0.240915	-3.29713	-5.28413	-5.71262	-2.93715	-4.43992	-5.00314	-7.36509	-12.2395	-1.70806	-3.28403	-1.83413	-2.54309	-2.22253	-1.28304	-2.09752	-1.88893	-3.79307	-2.64588	-1.94935	-0.573158	-0.981358	-1.6244	-2.91874	-2.20657	-1.4892	-3.2737	-6.86918	-0.747453	-10.1404	-9.72638	-1.99111	-2.71573	-3.51854	-1.79844	0.975627	-2.07143	-2.18117	-2.2239	0.0453213	1.37448	-8.53262	1.48757
b0298	insE-1 IS3 element protein InsE	0.92257	0.446247	-1.20686	-2.32326	-1.49417	-1.70401	-1.34141	-1.35743	-2.98094	-2.57873	-0.958722	0.792699	-0.784378	-0.638506	-1.35045	-1.38499	1.97872	0.870366	1.86141	2.01883	-1.19793	0.637034	-1.09632	0.679701	-0.887178	0.390274	-0.307382	-1.12652	-0.572716	-1.26968	-4.9938	-3.88803	1.10939	-0.18554	-0.939428	0.130572	1.2047	0.345759	0.66663	0.692457	-4.03537	-2.18498	-1.12241	0.13393
b0299	insF-1 IS3 element protein InsF	0.66303	0.35548	0.163268	-0.285731	-1.64192	-0.362859	-1.06617	0.18651	-5.13505	-4.37186	0.408001	0.0209379	0.77199	0.0628102	0.234349	0.239149	1.67518	1.40178	1.19432	2.43438	-0.497617	-0.296952	0.252267	-0.945214	0.532281	0.387339	1.18963	-0.848738	-0.132779	-0.0243845	-0.792136	0.125154	-1.07618	0.613243	-0.426247	-0.178474	0.122238	-0.141754	-1.26127	0.152563	-0.265011	2.5814	-0.507881	1.24637
b0300	ykgA predicted DNA-binding transcriptional regulator	2.63656	0.388588	-3.78093	LQ	-1.11032	0.314174	-0.841135	LQ	-3.38649	-2.44349	0.226063	-3.0134	1.40785	0.629832	0.398763	-1.8529	1.18235	0.544452	-1.56591	3.37177	-0.692818	2.95826	0.0795753	2.03983	0.160322	0.129221	-0.0781746	3.1047	1.35893	-1.38497	4.8864	5.40643	-0.554976	1.8422	0.606218	2.77276	2.08456	-3.13211	2.96909	-0.582601	1.90117	-1.01461	3.37056	2.44812
b0301	ykgB conserved inner membrane protein	2.16998	0.492423	-1.58992	-0.560748	-1.73016	0.0567833	-1.22775	0.814344	-2.83901	-4.8392	0.475765	1.10606	0.296802	0.478578	-0.152456	0.275119	1.1428	0.908716	0.847202	-0.321996	0.374359	1.47097	0.278971	1.04984	0.464584	1.33065	1.01423	0.800202	0.956933	-0.457823	3.19291	2.26466	0.368173	-0.114342	0.0872969	1.38252	1.7046	-0.325911	1.72825	0.602502	2.93425	1.34506	2.46419	1.49285
b0302	b0302	2.13674	0.694551	-2.36407	-3.0262	-0.902724	-2.78417	-2.13729	LQ	-0.185573	-2.97769	0.588709	-2.00088	0.373651	-2.68987	-2.68733	0.087633	-2.71202	LQ	-2.27275	-2.85343	-1.36356	-2.34751	-2.42302	-2.50359	-2.29685	-2.8375	-2.67425	1.60723	-1.92585	-2.00253	-2.81275	-2.72929	0.247244	-2.63997	0.995158	-2.47149	-2.54776	-1.66229	-2.7821	-2.15702	-2.38306	-1.47641	-2.08597	1.33936
b0304	ykgC predicted oxidoreductase with FAD/NAD(P)-binding domain and dimerization domain	2.67621	0.290459	-1.70558	2.24297	-1.78482	LQ	1.71915	LQ	-1.76369	-7.07547	-0.578449	1.21203	0.174837	3.80898	4.29464	0.466608	5.47849	5.15145	3.39772	3.96745	0.224201	7.23868	4.87178	6.86954	3.30134	4.7759	4.64988	2.16021	6.31621	1.06284	10.1709	10.3919	0.144517	4.90722	-0.687344	6.64991	8.68629	0.719735	7.2777	4.27179	6.63368	1.89128	7.61364	2.90994
b0305	ykgD predicted DNA-binding transcriptional regulator	2.30039	0.74086	-1.5055	-1.03312	-1.03133	0.836035	-2.4208	0.0758999	-4.4087	-3.63958	0.259287	-1.62362	0.272582	0.390215	0.45148	-0.0935212	0.403387	0.738283	-0.248494	1.14835	-0.938867	-0.912914	0.360825	0.724629	-0.0472054	0.192633	0.706894	0.950065	-1.33837	-0.584035	1.06795	1.55745	0.198136	-0.459957	-0.894126	0.791104	2.10207	0.16416	0.65319	-1.49137	2.03345	1.80222	0.661157	1.14912
b0306	ykgE predicted oxidoreductase	1.7265	0.297133	-0.398085	-4.3637	-2.9517	-2.16706	-0.150986	0.228344	-7.33842	-6.33864	-1.4621	-4.47972	1.11426	-1.1415	-1.26221	0.476022	-1.91428	-2.00276	1.24054	1.84424	-1.35719	0.231209	0.12261	-2.70489	-2.14138	1.86836	1.48362	0.463161	0.700514	2.55962	-1.89605	-1.46003	-1.13784	-1.6981	0.0426776	0.549414	2.50591	2.98046	-1.84499	-0.680458	-3.90261	0.825676	-1.97319	-0.953922
b0307	ykgF predicted amino acid dehydrogenase with NAD(P)-binding domain and ferridoxin-like domain	0.872078	0.330647	-1.07138	-1.56344	-1.22074	0.230737	2.09853	-1.20674	-2.23117	-4.01277	0.0282304	3.01913	-0.38674	-0.119982	0.0914481	-0.435708	-1.15612	-0.762706	-0.449888	3.63798	-2.74246	0.814724	1.29247	1.24131	2.72148	0.0058977	0.119828	1.55066	3.34703	0.942312	0.985137	2.37786	-0.232732	-1.25107	1.35558	1.15664	-2.09638	-0.0358461	1.42256	2.67252	-0.970937	-1.06229	0.0589133	1.36602
b0308	ykgG predicted transporter	0.268186	0.364238	0.391884	0.943475	-0.00846803	0.441537	-1.90892	-0.997031	-2.01949	-1.90633	1.31331	2.67504	1.25151	2.33744	1.84777	1.6277	-1.25228	-0.389702	1.47638	2.7093	-1.66436	2.14585	1.78309	2.98635	1.05351	0.372094	0.575881	0.724591	-1.27816	1.37582	-1.33816	-0.469243	1.51544	1.05415	1.82598	1.09054	5.30208	0.711262	-2.46569	0.108146	-2.86095	2.16391	-0.806756	2.73366
b0309	b0309	1.87202	0.601929	-1.32329	LQ	-1.86739	-2.27893	-1.502	LQ	-2.56614	-2.94267	0.122745	-2.1831	2.19792	-2.06868	-1.49497	-0.781224	-2.13575	-1.78555	-0.794102	-1.40525	-0.454282	LQ	-1.78734	-1.48137	-1.68349	-1.73881	-1.05789	-1.97238	-0.731364	-0.90075	-2.61628	LQ	-1.94362	-2.72021	-2.65536	LQ	-1.03699	-1.01914	-1.37847	-1.7447	-1.0551	0.415237	-0.989233	0.873031
b0310	ykgH predicted inner membrane protein	1.78323	1.06924	-2.60184	0.500638	0.638942	-0.0457863	-3.11276	0.470236	-1.32886	-2.33425	-0.0818508	-2.14264	1.95729	0.831442	0.477253	-0.698524	1.47632	0.724895	-0.431172	-0.00672539	-2.22397	0.865971	-0.586917	0.166752	-1.09271	0.0807347	-0.381088	1.20224	-0.851994	-1.34673	2.43802	1.91055	0.256158	0.115284	0.883944	0.95488	0.976632	-1.66729	1.11298	-0.780297	0.97128	-1.3187	1.32834	-0.248522
b0311	betA choline dehydrogenase	-0.245205	0.77554	-2.28452	-1.50281	-1.61217	-0.158007	-2.56594	-0.321055	-3.13955	0.593764	-0.102743	-1.99265	-0.717762	0.305969	0.7314	-0.113235	-1.40169	-0.573776	0.121519	-2.5607	-0.0760794	-1.63128	-0.06967	-1.21251	-1.3015	-1.20962	-0.707092	-0.332117	-1.00194	-0.500243	-1.85802	-0.86917	-0.586454	0.243571	-1.8558	-0.291042	-2.34725	-0.249912	-1.77072	-1.52316	-1.17306	0.254494	-1.50879	0.232168
b0312	betB betaine aldehyde dehydrogenase	-1.76305	0.562176	1.80412	2.42782	1.86813	2.64807	3.23651	2.00202	-0.908465	0.903059	1.87303	1.88562	2.06297	2.77745	3.05263	2.61685	-0.673637	-0.0820717	0.934472	1.65771	-1.63773	0.405462	2.43227	0.514868	1.58558	1.48253	1.40091	1.86135	2.30832	2.7391	-1.08529	-1.60926	0.313546	2.20331	0.245635	2.06042	0.145111	2.36534	-0.324041	1.54796	1.92122	2.50111	0.576554	3.2205
b0313	betI BetI transcriptional repressor	-0.823165	0.495823	-1.82547	-2.46119	0.35686	-0.156809	-2.12996	-1.37127	-2.06692	-1.92455	1.23571	1.32077	0.591737	0.987982	0.539491	-0.546966	-2.46641	-1.87644	0.420917	3.67043	-2.62181	0.513545	-0.140544	-0.67175	1.60732	0.0186778	0.0939496	-0.205382	-0.573897	-0.395965	-0.351397	-1.2123	-0.665342	2.83614	1.6499	-1.10499	3.23272	0.414287	5.18918	-0.167648	-2.9318	-2.36585	0.359538	-0.735709
b0314	betT BetT choline BCCT transporter	-0.119676	0.273961	-0.995025	-2.27724	-2.82326	0.476801	-2.91325	1.17565	-2.11857	0.189256	0.522249	0.83092	-0.476745	-0.0830787	0.139281	-3.02255	-0.365315	LQ	1.96371	1.04716	-0.690686	-2.25068	1.90481	-0.455681	1.56011	-1.19886	-1.10751	-0.700141	2.88223	1.47838	-4.30862	LQ	-1.41187	-0.330141	-3.23289	0.438243	-1.0033	2.7028	-1.8968	1.47216	1.32514	-0.333611	-1.72172	0.641264
b0315	yahA phosphodiesterase, c-di-GMP-specific	2.9877	0.210597	-0.355917	-7.08379	-5.10656	-4.07671	-10.1998	-5.00176	-4.08928	-11.8924	-1.18079	-2.58976	-0.898382	-2.66062	-3.79813	-0.175305	-1.22071	-2.86846	-2.18307	0.955853	1.84615	-0.997328	-2.86494	-2.12961	-3.15902	-1.49829	-1.54453	0.886342	1.56278	0.257572	1.75668	0.832925	-1.98168	-3.41428	-3.65838	-1.57578	0.510049	-1.44616	0.464298	-4.39084	0.470932	1.01359	1.08413	3.53262
b0316	yahB predicted DNA-binding transcriptional regulator LYSR-type	1.68572	0.317419	1.25686	-0.253486	LQ	-1.87999	-7.13861	-2.52474	LQ	-3.70031	-0.946624	-0.932524	1.01539	0.0947315	0.699643	1.88812	0.190635	1.01735	2.98555	2.77237	1.03039	0.159165	0.0962123	0.44428	-1.07917	-0.544258	-0.0275189	LQ	1.67786	4.26106	0.236645	1.96951	LQ	0.813253	LQ	-0.714209	2.58309	0.799786	-2.4968	-0.627723	7.4679	-0.294938	-3.12451	6.08162
b0317	yahC predicted inner membrane protein	2.23416	0.676736	-1.34986	-2.84831	-1.61376	-1.50909	-4.66021	-1.60356	-2.84725	-3.53684	-2.30861	0.40727	-1.00434	-1.80518	-1.96061	-0.674928	-0.804743	-0.987582	-0.663655	0.431274	-1.64298	-1.63073	-0.891158	-1.09067	-1.6874	-0.635017	-0.893727	-0.661604	-0.326836	-1.42328	-6.37825	-5.44423	-1.59698	-1.24838	-1.34911	-0.967704	-0.424179	-0.338788	0.462854	-2.74347	-1.56163	-0.547116	-0.473977	-1.4163
b0318	yahD predicted transcriptional regulator with ankyrin domain	3.16962	0.420587	-1.87461	-4.24286	-3.86082	-3.25541	-3.02004	-0.131942	-5.05877	-7.32356	-3.53101	0.294075	-1.37213	-1.80207	-1.2714	-2.06715	-5.37833	-5.56477	-5.53219	-2.24356	-0.500568	-2.74543	-1.39615	-2.53131	-1.32008	-1.29296	-1.35395	-2.72674	-2.79369	-0.692192	-8.00321	-7.08466	-1.99692	-1.56129	-2.13579	-2.89802	-1.30827	-2.8551	-3.94601	-2.13646	-8.71389	-2.13778	-2.00903	-3.34544
b0319	yahE predicted protein	3.17682	0.344403	-0.950534	-2.77455	-1.7063	-3.1609	-0.417847	-0.323581	-5.79586	-6.301	-0.947065	-1.76936	-0.337316	-0.861038	-0.513337	0.663866	-0.722832	-1.19187	-0.665272	-2.88184	0.781177	-1.11508	-0.953791	-1.67415	-2.11445	-2.02059	-2.16593	-0.669088	-1.18666	-0.353966	-1.87664	-1.94956	-1.2352	-1.48453	-0.996947	-1.14175	-0.587279	-0.985455	-1.65137	-3.50051	-0.806608	-1.15427	-1.16021	0.330561
b0320	yahF predicted acyl-CoA synthetase with NAD(P)-binding domain and succinyl-CoA synthetase domain	-0.17658	0.509263	0.534322	-0.531378	0.338991	0.438045	-1.81654	1.23212	-1.75957	-0.739242	0.482935	1.41004	1.03871	1.50033	1.73628	0.846186	0.00998503	0.781997	1.07079	-1.3375	-3.45033	-0.158205	1.09437	0.788963	0.842148	-0.401101	0.304203	0.278334	0.0421637	-0.0604787	0.00937986	0.401023	0.236444	1.9114	-2.14392	0.491062	-0.251523	1.51911	1.20625	1.52527	-1.50041	1.40808	-1.45066	-0.175787
b0321	yahG conserved protein	-0.81226	0.618459	2.97108	3.40321	1.62134	2.01095	-0.605154	-0.402877	-1.73243	1.38367	0.530078	0.898533	0.362999	0.793998	1.08098	0.403054	-1.11632	-0.260247	1.64848	0.926624	1.06316	-1.27183	0.905353	-0.00464145	0.603187	0.125394	0.273959	-0.00146135	-0.146923	0.591759	-1.94594	-1.40354	-1.41544	0.00902018	-3.30616	-0.861388	-1.62464	0.89691	-1.32859	1.02067	-0.920695	1.66427	-0.478878	0.472628
b0326	yahL predicted protein	2.31426	0.410585	-2.03121	-1.27451	-1.87774	-1.12057	0.775764	0.907468	-2.3132	-7.36951	1.32914	0.410571	0.819099	-0.25521	-1.19436	0.298338	1.63554	0.767169	-0.897631	-0.540054	-0.677844	1.53282	-0.256311	1.95701	0.449017	0.419489	-0.337848	1.52607	-0.981861	-1.30578	2.21191	1.68068	0.808081	-0.949898	-1.3437	0.617602	1.29542	-0.796164	0.701605	-1.36655	3.22004	-1.31417	0.875675	-0.302825
b0327	yahM predicted protein	2.78631	0.834331	-4.47627	-2.56885	-1.7596	-2.57226	-1.34999	LQ	-3.60561	-3.86825	-0.903328	-1.10973	-2.08207	-1.28613	-1.30381	-0.551077	-1.41301	-1.53757	-3.48123	-1.33502	-0.525094	-0.837443	-2.79049	-2.02421	-1.67843	-0.716274	-0.772387	-1.75103	-1.15614	-1.22051	-0.931069	-1.12267	-0.247774	-1.06568	-0.169188	-1.94488	-1.05066	-1.53509	-2.02009	-2.31458	0.457624	-4.49626	-0.348295	-3.47079
b0328	yahN predicted neutral amino acid efflux system	1.90141	0.397834	-4.43411	-0.675826	-1.51677	-1.04305	-5.83971	-1.02664	-4.72776	-8.24527	-0.35252	-1.77743	-1.04752	-0.995379	-0.926704	-0.0770828	-0.520778	-0.592769	-0.258852	3.89215	1.21266	0.363285	0.0692613	0.730347	0.552995	0.837261	1.44031	-0.370466	-4.08031	-0.625246	-2.0552	-1.75857	0.963799	-0.343215	1.24869	-0.95904	-0.547305	-0.494103	1.92007	0.696856	-4.34751	-3.51563	1.85982	0.0930371
b0329	yahO predicted protein	2.78761	0.90559	-2.33158	-3.09511	-2.33507	-2.64401	-3.70235	-2.98186	-0.663624	-2.91759	-0.970612	-2.79943	-0.518438	-1.77461	-2.29453	-1.17944	-0.415544	-1.04568	-2.29416	-1.10636	-0.985612	-2.06178	-2.13763	-1.79632	-1.91371	-1.44025	-1.96401	-1.69439	-1.23071	-1.99971	-1.67837	-1.88113	-1.01243	-2.10412	-2.02268	-2.27789	-2.43838	-2.19699	-1.26955	-1.75165	-1.83124	-2.37643	-0.721972	-0.0539582
b0330	prpR PrpR transcriptional dual regulator	-0.772332	0.827976	0.661636	-0.705981	0.14075	-0.176286	-2.51576	0.0564844	-0.369414	-0.48382	-0.0911682	0.818956	0.00372647	-0.23769	-0.311792	-0.67332	-0.0326694	0.420188	1.19374	-1.12528	-0.650487	-0.90174	0.696138	0.985321	0.867318	0.123567	0.420309	-0.892864	1.49857	-0.942599	-1.68078	-1.02597	-0.498152	1.2786	-0.553633	0.253626	-1.40502	0.480053	0.474887	0.515162	-1.19669	0.115822	-1.38879	0.32587
b0331	prpB 2-methylisocitrate lyase	-1.20787	0.528862	-0.784266	1.22579	1.43657	0.127878	-1.52898	0.0383546	-0.480502	1.16136	1.35177	1.13355	1.17654	0.844713	1.42533	-0.304142	1.89764	2.10576	2.34442	-3.73648	1.5926	-0.970939	0.901921	-0.787726	1.33041	-0.314934	0.493236	1.46914	-0.352084	2.51394	-4.13048	-3.67702	-0.859409	3.68263	0.0394097	1.6931	-4.32502	-0.833856	-2.3934	0.892629	-1.04394	1.53963	-1.35789	-0.8672
b0333	prpC methylcitrate synthase	-0.730071	0.600445	2.10036	-1.68572	-0.229216	0.550789	4.16576	0.140691	-0.696207	0.0860571	0.104119	1.48852	-0.0857992	-1.09802	-0.871284	0.0971781	-1.30842	-0.884376	0.440024	1.94908	1.01297	-0.0518347	0.760187	-1.80166	0.430264	-0.43909	-0.359675	-0.0946531	0.907806	0.981153	-1.61075	-1.95838	-1.91472	-3.10305	0.0499766	-0.376166	-0.789643	-0.0772917	-0.659772	0.631877	0.737809	0.194878	-3.34332	1.35551
b0334	prpD 2-methylcitrate dehydratase	-0.460565	0.457607	-1.25477	-1.5308	-1.80939	-1.4528	1.78711	-2.32431	-1.99553	1.51412	0.155227	-1.92049	-0.941487	-1.81366	-1.20321	-1.08659	1.34954	1.80043	2.57061	-1.67325	-5.43719	-3.11664	0.189943	-0.657484	1.07703	-1.47925	-0.898449	-1.47126	-1.16671	2.37735	-5.07995	-4.25256	-0.80896	-2.73771	-5.48976	0.0868662	-0.732498	-0.217028	0.266875	-1.20113	4.64533	0.559511	-3.68074	1.06486
b0335	prpE putative propionyl-CoA synthetase	-0.814003	0.830212	-0.0966018	-0.969856	-0.686422	0.0918875	-1.51719	0.0683832	-2.09232	0.709277	-0.0576018	-0.205923	-0.616338	0.365321	0.57317	0.18716	-1.48808	-0.863411	1.15984	-0.789697	-1.30163	-1.03596	0.331717	-0.502242	0.258689	-0.50876	-0.352212	-0.284579	0.0967546	0.0351779	-2.16337	-2.09039	-0.666254	-0.583944	-0.952872	0.106723	-2.16036	0.514799	0.0106187	0.558713	0.713573	0.865424	-1.23487	0.118162
b0336	codB CodB cytosine NCS1 transporter	-1.4144	1.05235	-0.969852	-0.0475564	0.311008	1.53652	-1.71377	0.797186	-0.0668062	0.61286	0.845385	0.00695525	0.327814	1.09639	1.07231	0.999555	0.808229	0.942826	0.161184	0.325298	-0.476353	0.590594	1.41902	2.09012	0.944785	0.472311	0.418789	0.30667	0.743581	0.693952	-1.18666	-2.13994	-0.26739	-1.01422	-1.82844	1.42542	-1.13437	1.98769	0.542545	1.09289	-1.23872	0.161225	0.185964	1.05273
b0337	codA cytosine deaminase	-0.0624455	0.388829	-2.91016	-3.20066	-0.0201498	-1.3597	-5.1925	-1.28043	-2.33289	-2.01312	0.99205	2.44775	-2.56882	-1.25689	-1.1042	-0.687038	-2.16782	-2.04986	-3.69308	-5.50386	-4.34657	-2.05371	0.14229	1.23293	-0.196819	-2.85825	-3.0442	-1.3112	0.166137	-3.06872	-6.5343	-7.23901	-0.958416	-3.69437	0.196513	-2.86256	-7.35075	-2.35387	-2.62336	-0.0943785	-2.30172	-3.4332	-3.75762	-4.01217
b0338	cynR CynR transcriptional dual regulator	-0.190754	0.399157	0.479499	-0.354172	-0.160779	-1.18801	-0.601765	-0.884852	-0.871832	0.151164	1.12889	-0.778742	0.594837	0.412891	0.0699077	0.413254	2.21605	1.46902	0.318282	-2.36907	-0.874252	LQ	0.586338	-1.26249	0.551014	-0.808157	-0.192151	-0.36275	1.92733	1.47428	-3.55881	-3.19695	-0.368729	-3.23315	0.443525	-0.349408	-3.96652	-0.345316	LQ	-0.154996	3.31252	0.125164	-3.89128	2.3609
b0339	cynT carbonic anhydrase monomer	-0.584206	0.22472	1.11906	-1.39871	2.39317	1.51871	-8.71683	-0.604186	-5.31243	4.51038	3.07818	5.61049	-1.17301	1.43476	1.64422	4.61397	-5.92293	-4.00014	-2.70582	-4.21865	-7.5978	-4.57801	-1.41861	-1.18494	4.75892	-0.84753	-0.403494	-0.473937	-3.63144	5.89619	-9.99358	-9.25312	3.37175	-2.05567	5.68745	1.25102	-7.4239	3.50132	-6.93147	-2.08689	5.03583	2.14009	-8.11399	-4.12236
b0340	cynS cyanase monomer	-0.0531289	0.543566	0.660285	-0.224304	-0.437463	-0.786779	-2.59997	-1.50277	0.0109076	-0.43705	-0.869554	-0.84154	-2.00875	-0.466828	-0.402272	-1.18773	-2.69188	-2.29899	-0.885162	-2.08529	-2.62584	-2.24048	-0.298246	-1.07485	-0.465657	-0.633253	-0.440596	-0.0178892	-0.655245	0.0829431	-3.73237	-3.42517	-0.753609	-1.88319	0.301906	-2.18641	-3.96361	1.17567	-0.507856	-1.41708	2.24316	1.73871	-2.77298	0.746755
b0341	cynX CynX cyanate MFS transporter	-0.257006	0.418237	0.6926	2.73167	-0.53845	1.32133	0.72693	-2.30651	-4.68155	-1.23734	1.30114	1.51303	0.192388	0.995498	1.20461	-0.698895	-1.66997	-0.98926	2.97499	3.54595	1.91736	0.468409	2.49246	-1.13694	0.849501	-0.952736	-0.535755	5.87894	2.23088	1.49088	0.860413	1.49273	-3.00833	2.17158	0.801983	0.723042	-1.79726	2.68453	-1.94755	0.915146	6.94551	-1.42081	-3.96078	6.66589
b0343	lacY LacY lactose MFS transporter	2.13101	0.295002	1.16971	-1.1486	-0.474334	0.859258	-0.122929	0.903426	-2.81309	-4.73788	0.423153	0.452375	1.36884	-0.604879	0.147542	0.326553	3.50607	4.00245	1.54368	-3.99728	2.0317	1.02393	1.05097	1.08775	2.19173	1.66047	2.6494	1.21824	2.04882	1.82636	0.772718	1.98845	1.77102	2.20727	0.824564	2.04572	2.54945	1.26493	2.09496	2.97253	0.844782	-1.5325	-3.0567	1.28857
b0344	lacZ beta;-galactosidase monomer	-0.447097	1.7615	-1.15177	-1.2126	-1.33325	LQ	-0.95563	LQ	-0.894939	LQ	-0.64631	-0.986012	-0.889428	-1.14889	-0.950875	-1.10908	-1.02794	-0.652628	-0.992432	-1.92603	-1.11241	-1.46985	-0.873171	-1.59853	-0.943649	-1.19364	-0.855084	-1.39666	-0.789519	-0.718238	-1.33548	LQ	-1.38024	-1.43723	-1.4041	-1.36346	-1.59874	-0.683479	-1.59369	-0.875584	-1.73527	-1.04472	-1.34865	-0.929194
b0346	mhpR MhpR transcriptional activator	-0.0605514	1.16602	-0.302892	0.357821	0.0319216	-0.804013	-1.78666	-1.88541	-1.12448	0.539764	0.236244	0.00809608	0.0631312	0.000498563	0.0679113	-0.822847	-0.128738	-0.0775893	-0.66154	-2.54488	-0.389245	0.260173	0.570829	0.400338	0.369602	0.655241	0.809228	-1.0609	0.190819	-0.154792	1.49467	1.99051	0.0714134	0.466288	0.44761	-1.21381	-0.13448	-0.197729	0.980918	0.787156	-2.29065	-0.846358	-0.25427	-0.37615
b0347	mhpA 3-(3-hydroxyphenyl)propionate 2-hydroxylase	-1.36889	0.581811	2.27248	1.75718	1.29176	0.380006	-3.03572	-0.552662	-1.07326	1.08567	1.59752	-0.694883	0.439407	1.01313	1.30148	-0.502309	0.363962	0.659808	-0.870921	1.56607	-0.898896	-1.49068	1.79508	1.99564	2.23374	0.421609	0.869965	0.481838	3.06795	0.612924	-2.63134	-1.6243	0.0595347	2.93594	2.31549	-0.258369	-1.54439	2.60774	0.849907	1.6771	-3.03013	-1.22538	-0.88882	2.94425
b0348	mhpB 3-(2,3-dihydroxyphenyl)propionate dioxygenase	-0.752162	0.485287	3.02212	1.0468	0.043398	1.1928	0.517537	LQ	0.316493	1.19001	1.28665	1.75919	0.0147355	-0.954173	-0.940325	1.26787	-4.1365	-3.76114	-1.92883	2.19067	4.07774	-3.70772	-0.255817	-4.13845	2.50585	1.50728	1.95647	-0.122314	-0.850591	2.47892	-2.8794	-2.60164	-1.28073	-0.530051	-1.32855	1.8079	-4.59455	1.1635	-1.06564	-2.23774	-0.455595	0.732097	1.38632	3.18869
b0350	mhpD 2-keto-4-pentenoate hydratase	0.196686	0.359523	0.292008	-7.86432	-0.389625	-1.47349	-0.643182	-10.4299	1.15014	1.18788	0.290987	-10.9088	-0.0844556	-0.890331	-0.94996	-0.704316	-4.40376	-4.12093	0.686825	-12.5684	-0.0936767	-6.77105	-0.323236	-2.54882	-1.17343	-2.41595	-0.997249	-0.913747	-4.77125	-2.82467	-11.5168	-12.5684	-0.843361	-10.472	-0.677386	-1.87616	-6.356	-3.12336	-12.5684	-2.8646	-4.28644	1.19976	-7.89687	-0.139188
b0351	mhpF acetaldehyde dehydrogenase 2	-0.513233	0.436205	0.542507	-2.33161	-0.0769075	0.412084	-0.299307	-2.35731	0.261195	-0.00401847	0.835568	0.00737741	1.44367	-3.00545	-1.42511	-0.814231	-5.60814	-1.71662	-1.52068	-0.272749	-1.13469	LQ	0.258599	-0.742548	1.25929	0.429642	0.589103	-1.00454	1.90998	-3.96218	-3.24854	-2.51846	-1.57802	-0.734729	-0.140934	-1.42207	1.59922	-0.744295	LQ	0.778644	-5.79996	0.21121	-6.34883	1.71137
b0352	mhpE 4-hydroxy-2-ketovalerate aldolase	-1.98193	0.634847	2.32679	0.762604	2.80764	1.35212	-0.180201	2.92428	0.299179	1.3815	2.81486	2.41721	3.34055	2.54778	2.84104	0.433855	0.661871	0.727248	2.12058	1.38068	2.9741	-0.484569	1.56708	2.14668	2.7154	1.28312	1.48757	1.48723	3.9623	2.28406	-1.6472	-1.69365	0.334129	2.18655	1.55452	2.09603	-0.509256	1.96685	-0.9296	2.3607	-2.22691	2.73986	-0.240244	0.880205
b0353	mhpT MhpT MFS transporter	0.16827	0.535157	-1.388	-3.01166	-1.13693	-1.89368	-1.22251	-0.623132	-3.93616	-2.44565	-0.71582	0.421417	-1.25335	-0.455643	-0.286063	-0.884249	-3.55994	-3.69543	0.825816	-4.11082	-2.05173	-4.16114	0.17528	-3.29093	1.38747	-0.355263	-0.171426	0.702425	-0.448066	-1.56375	-4.15856	-3.50071	-1.68202	0.894932	1.77662	-1.61938	1.58813	-0.592237	-2.00232	-0.201395	2.60808	-1.66702	-1.6541	2.22925
b0354	yaiL nucleoprotein/polynucleotide-associated enzyme	-0.167515	0.699425	1.77425	1.89228	3.02589	1.44955	-0.708935	1.6944	0.372154	-0.590008	2.91967	3.90288	2.35068	2.26419	1.76742	2.40506	0.390613	-0.193949	2.33613	2.55347	2.10444	3.80098	2.11847	3.60134	3.7089	3.55498	2.92637	3.40584	3.81879	2.04569	5.59102	5.51819	3.65097	4.86764	3.6661	2.45369	-0.85595	2.34037	3.45651	3.72034	4.03065	2.39148	4.32112	1.78234
b0355	frmB S-formylglutathione hydrolase	1.21077	0.309937	-1.38216	-3.88872	-3.36855	-2.67648	0.528058	-2.37177	-2.28278	-5.50419	0.348361	-0.544013	-1.22503	-3.4555	-3.45257	-2.56543	-7.95994	-5.32044	-7.78671	-4.25552	-2.2409	-10.1264	-0.177918	1.90324	-0.671026	-1.3273	-0.961499	-1.30735	-3.04968	1.83771	-10.5102	-9.26827	-1.67534	-0.715939	-5.27897	-3.49563	-5.07792	-3.06365	-2.42821	-2.2836	-0.766728	0.648782	-3.67733	3.11639
b0358	yaiO outer membrane protein	2.12838	0.309987	-1.71721	-1.52234	-1.93597	1.50279	-7.91246	-0.237959	-2.65057	-2.40354	-0.0862409	-1.63655	-0.037046	-0.925003	-1.17785	1.69078	-1.75447	-1.50222	-0.858785	-6.17667	-2.24289	-4.10588	0.864169	2.60425	-0.972793	-0.985164	-0.82023	1.0819	0.306694	-0.197805	-0.615943	-0.590006	-2.03769	-0.77956	-0.910967	0.440805	-2.70256	0.811847	-0.972283	-1.88801	-2.73266	1.60499	0.617664	1.50463
b0359	yaiX predicted acyl transferase (pseudogene)	1.98527	0.300361	-1.08152	-1.75555	-3.69808	-1.67567	-1.42567	-2.31569	-1.85456	-2.6096	0.273904	-2.68647	0.33264	-1.33949	-1.94024	-1.50678	1.11082	0.0162163	-0.337247	-3.30877	0.017776	0.0340627	-1.13397	-2.02714	-2.30853	-1.58013	-3.03922	-0.875228	-0.411594	-0.503152	-8.86204	-6.91928	-1.91358	-2.79955	-1.63989	-1.60029	-2.01378	-2.4965	-1.07097	-2.24995	-3.14926	-1.77938	-1.49825	1.84741
b0360	insC-1 IS2 element protein InsA	1.89151	0.608044	-0.959476	-0.413707	-0.470067	-0.0629666	0.129246	-0.151461	-3.80499	-3.28363	0.252986	-1.28874	0.183336	0.563403	0.353794	0.778908	1.38219	0.943021	0.344062	0.434531	1.6539	0.0495917	0.21873	0.380657	-0.124798	0.468934	0.376853	0.134855	0.470729	-0.695298	-0.0499663	-0.522796	0.117657	0.159519	-0.0821195	0.833528	0.999756	0.38876	0.401948	-0.479973	0.0292196	1.19857	0.704038	1.33845
b0361	insD-1 IS2 element protein	0.704037	0.307378	-0.546589	-0.321204	-2.02593	0.515158	1.69786	0.284947	-5.59218	-4.31202	0.593599	1.48841	0.646993	1.30465	1.48406	0.648497	0.818366	1.28711	-2.0986	-0.812405	2.38695	-1.28113	0.916228	0.285782	0.615434	0.398451	0.831134	0.0339599	0.973575	0.194345	-1.62162	-1.24625	-1.20683	0.399399	-1.5171	0.895881	0.870617	0.529856	-0.69407	0.79642	-0.944315	2.53012	-1.56572	0.847684
b0362	yaiF predicted protein	2.08387	0.264344	0.427166	-2.38007	-2.2156	-4.91001	-0.194936	-4.82824	-3.81692	-9.63298	-0.168401	2.14078	1.2126	-0.587645	-1.0365	-0.115448	-0.608918	-1.38693	-0.21176	-5.44535	2.0821	-2.08698	-0.0276748	-1.62759	-1.11811	-1.88579	-3.27788	-0.832945	2.16183	-0.596163	-5.28431	-4.35624	-1.80318	-4.05146	0.455439	-1.90349	1.51645	-2.02036	-0.639769	-0.520217	-3.87024	0.392417	-0.5394	1.66986
b0363	yaiP predicted glucosyltransferase	1.50026	0.3804	1.26376	-0.1231	0.118091	0.0338863	-1.37586	-0.0177002	-4.07156	-3.80428	1.5915	0.750339	1.311	-0.232456	0.785852	0.742376	-0.591743	-0.0345253	1.13491	-6.36943	0.204434	0.208944	0.299327	0.00377232	0.622361	0.55145	1.42585	0.303713	-0.0822499	-0.971775	0.360434	2.64196	1.18919	1.66515	0.838584	0.885564	1.03822	1.46617	2.07758	0.398492	1.64038	0.26639	-0.151075	1.54715
b0364	yaiS conserved protein	2.53168	0.347371	-1.67364	-3.4109	-2.34807	-4.57963	-3.436	-4.12638	-4.00327	-6.97343	0.0988434	-3.77853	-0.329742	-2.08491	-3.76713	-1.44112	-1.66695	-2.9625	-2.72479	-1.09087	-1.51001	-1.16982	-2.94975	-2.69296	-1.8642	-1.25573	-2.31347	-2.25782	-1.95607	-3.20191	2.79641	1.17874	-0.681797	-2.14435	-0.962659	-3.18989	-5.83206	-2.36975	-1.98908	-1.12171	-2.32771	-3.06413	-1.87414	-0.540364
b0365	tauA taurine ABC transporter	-0.239385	0.413609	0.771442	0.162892	-0.725987	-0.776699	1.49187	0.426483	LQ	-1.30786	0.515223	-2.42777	-1.24103	1.19837	1.49947	0.776117	-0.25901	0.0940597	1.09493	1.76912	3.82031	-0.305014	1.08824	-0.411455	0.405116	2.21851	2.63754	1.38518	1.4402	0.969687	-4.39331	-3.20995	0.0839171	-0.952294	1.68136	2.46479	-0.735674	2.26231	-0.659452	1.55839	-5.01301	-0.419993	0.129634	2.53883
b0366	tauB taurine ABC transporter	-0.429722	0.495268	1.06029	-1.30708	-0.586652	-1.8674	-2.92578	-1.74086	-2.9183	-0.521603	-1.04603	-3.53152	-0.817886	-0.56388	-1.18968	-2.4086	-2.80033	-2.29851	-0.229736	-5.274	-3.77287	1.58487	0.0742503	-3.33414	0.644799	-1.22302	-1.17078	-0.525841	3.45689	-1.71603	-5.60452	-4.88349	-1.5642	-4.5819	2.16839	0.54686	-4.55435	0.984344	-2.67841	1.01126	-6.29339	1.89372	-3.81841	-1.30609
b0367	tauC taurine ABC transporter	-0.630943	0.279448	-4.61549	-2.46973	-3.43582	-4.04682	-2.07955	-1.48857	-5.68693	-1.29016	-0.939116	-1.34516	-1.94543	-0.68627	-0.0351649	-1.40612	-4.68988	-2.72448	-1.76875	-10.7897	-6.61079	-4.85083	-0.091596	-8.5106	-1.32104	-2.13708	-2.01806	-2.05691	2.16727	-0.421005	-4.81147	-4.45127	-3.05442	-4.08554	-4.56294	-0.815924	-8.36267	-1.95104	-9.31606	-1.83736	-8.3547	-4.81155	-5.20104	-0.712864
b0368	tauD taurine dioxygenase	0.281013	0.580968	-0.359129	0.33518	-0.953612	-2.5586	0.898476	0.275342	-3.92139	0.151969	-0.156812	LQ	-1.15972	LQ	-1.29114	-0.45704	1.03785	1.85381	-1.55384	-5.1534	-1.65259	-1.02588	LQ	-3.02433	LQ	-0.990993	-0.27483	-1.51763	0.983805	LQ	-6.89721	-3.34676	0.107193	-0.432501	-0.977194	-0.829871	-3.16644	LQ	-0.881511	0.216858	-4.55985	-4.65358	LQ	-0.666162
b0369	hemB porphobilinogen synthase	-0.0165184	0.330706	-0.50287	2.55146	-0.298014	-0.572191	0.0730277	LQ	-1.20953	-2.69697	0.126193	5.60732	0.47642	-0.24064	0.373872	-0.729608	2.28432	2.61176	-0.287272	-2.18465	-0.624955	-0.157518	0.424282	1.6628	1.2587	2.1425	1.97464	-0.131358	0.660766	0.369792	-0.211629	0.691301	0.182453	6.26227	0.471602	0.916539	0.534675	0.205635	2.86714	2.12677	0.430374	-1.44125	4.36869	0.0320372
b0370	b0370	1.87347	0.770478	-2.68014	-1.72185	-0.801369	-2.14488	-2.00543	LQ	-1.9834	-2.11653	1.65594	-1.49555	0.653912	-1.56752	-1.37714	-0.748934	-1.31702	-0.960549	-1.07975	-1.94697	-1.38743	-0.522895	-1.84945	-1.02672	-1.62612	-1.41378	-0.814336	-0.718009	-0.942946	-1.69495	-0.998815	LQ	-0.169336	-0.868689	-0.579303	-1.24232	-1.08719	-1.47921	-0.934848	-1.55037	-1.07806	-2.8711	-0.206657	-1.10118
b0371	yaiT conserved protein	3.50763	0.643537	-2.21309	-2.38188	-0.635186	-0.78863	-1.3579	0.457762	-1.94183	-4.2114	-0.0826637	-2.6459	-0.0122899	-0.807428	-0.986912	-1.30373	-0.315505	-0.698156	-2.44248	0.0746092	0.551712	0.983014	-0.983245	0.834602	-0.355341	0.0834922	-0.213089	1.48844	-0.514642	-3.20071	2.39895	2.03228	0.775224	0.481993	0.271422	0.836139	1.13849	-2.1424	0.838786	-1.1239	1.90473	-1.25839	2.11983	-0.0167172
b0373	insE-2 IS3 element protein InsE	0.964009	0.484546	-1.15949	-2.84874	-1.52452	-2.49194	-1.29558	-2.01138	-2.74779	-3.71656	-0.899604	0.321942	-0.825447	-0.860314	-1.75072	-1.25876	1.22351	-0.25109	1.40805	2.11105	-1.08303	0.676271	-1.7489	0.467359	-0.919402	0.299556	-0.275315	-1.17057	-0.909364	-1.39344	-4.37363	-3.64416	0.964221	-0.127365	-1.08762	-0.171214	0.929934	-0.454927	1.07473	0.139429	-3.56194	-2.14047	-1.17891	0.19932
b0375	yaiV predicted DNA-binding transcriptional regulator	1.39305	0.307972	-1.63338	0.641036	-0.849765	-1.353	-1.11244	1.5262	-5.22636	-6.12045	0.148212	3.73076	-0.493741	0.204713	0.0194279	-0.658077	5.3355	4.65479	1.50389	4.66038	0.472497	6.04606	0.0955764	3.82018	0.700181	4.0649	3.85048	-0.449371	0.280396	4.12887	4.58609	2.76315	2.12804	5.58779	0.888538	2.85482	0.475116	1.62917	5.67262	2.92591	0.718324	-2.049	5.1791	-0.502153
b0376	ampH penicillin-binding protein	0.682752	0.230969	-4.22442	-0.148996	-0.754076	-0.25776	-6.01029	-0.892304	-6.05158	-4.90119	-1.89234	-5.63236	0.284075	-0.499112	0.38748	-2.22003	-3.15265	-1.85276	-1.96628	-4.28993	-0.185803	-1.77858	1.61384	0.980878	-0.514652	-1.58077	-0.034497	1.24433	-2.56642	0.780685	-6.88509	-4.81036	-2.04004	-1.22613	2.52901	-0.364702	4.67409	0.948178	1.3015	1.89168	-6.87767	0.719269	-5.50111	3.29735
b0377	sbmA predicted transporter	-0.189059	0.698928	0.463474	1.79323	1.1213	1.3991	5.49601	4.08278	-1.5779	-0.907024	2.49588	0.853221	1.39834	1.88289	2.02979	0.677852	-0.0507006	0.667017	1.38636	0.715648	0.676507	-2.07257	1.1729	-0.917424	1.33328	1.27956	1.45092	-0.147552	1.52303	2.02167	-4.05336	-4.03782	0.516581	-0.634989	-0.915637	1.35785	8.12723	8.68423	-0.337645	-0.78223	-4.16415	-0.235593	0.942405	2.29764
b0378	yaiW predicted DNA-binding transcriptional regulator	-0.431996	0.855001	-1.49279	0.417446	-0.714145	-0.0492952	0.0758134	0.0267218	-1.50936	-0.393896	0.053143	0.156789	0.261817	-0.441358	-0.308849	0.708659	-1.12672	-0.860735	-0.171422	-1.78761	0.760899	-1.87205	0.209107	-1.05969	0.196833	0.253595	0.171896	-0.462451	2.05858	0.103513	-0.236068	-0.257035	0.00432752	-0.729099	0.794727	0.0523491	4.50415	3.50147	-0.628232	0.121196	-2.00435	0.0892963	0.49815	0.412383
b0380	yaiZ predicted inner membrane protein	0.753581	0.528045	-4.15297	-2.63	-2.88158	LQ	-3.6224	LQ	-3.41289	-2.59476	-4.17302	-0.958619	-2.9455	-2.45202	-2.30208	-2.99142	-1.92322	-1.91314	-1.48677	-1.5656	-4.43131	-1.31491	-1.98065	-0.844517	-1.4594	-2.51386	-2.37029	-2.18999	-1.98841	-1.65958	-3.74406	-3.30637	-1.8338	-2.30726	-3.1917	-1.62751	1.95405	-0.949087	-3.72776	-1.50412	-0.562001	-4.28566	0.017879	-0.24893
b0381	ddlA D-alanine-D-alanine ligase A	0.428913	0.418528	-1.65529	0.908252	-0.317888	-1.25873	-4.45023	0.30779	-0.978376	-2.29652	-0.758854	1.14977	-0.276402	-0.468338	-0.580594	-1.05097	-1.16426	-1.48963	-2.66926	1.43353	1.50092	-0.808203	-0.273774	-1.32145	0.533712	0.647065	0.674396	0.737256	-3.32781	-2.93283	-3.05339	-2.98681	0.365332	-0.186975	0.257114	0.531613	-3.22089	-0.0926848	-0.175316	0.287871	1.36376	-0.00506762	0.952689	2.42831
b0382	iraP anti-adaptor protein for sigma; S stabilization	2.01479	0.853069	0.859636	-0.603424	-0.589949	-1.42756	0.437471	LQ	-1.30863	-2.29599	0.309879	-0.171191	0.53207	-1.04023	-1.24985	-0.522099	-0.714929	-0.752483	-0.499359	-1.84201	0.0670844	-0.465476	-0.916624	-1.15515	-0.198576	-0.590438	-0.595808	1.0466	0.178945	-1.18996	0.470633	0.0303191	0.824303	-0.551614	0.222507	-0.96657	-1.99183	0.0735581	-0.247826	-0.307434	0.804346	-0.884561	-0.227091	1.05017
b0383	phoA alkaline phosphatase	0.848692	0.385415	-1.03834	-1.85416	-1.75489	-1.00119	0.657252	-0.926488	-2.526	-1.19313	-0.578261	-1.75013	0.00589357	-0.173145	-0.0753828	-1.52996	-0.290023	-0.424709	-0.590789	-3.38929	-0.0767235	-2.24599	-0.247965	1.05483	-0.577067	-2.33247	-1.29702	-0.0502595	-0.984911	0.614153	-2.03849	-2.16405	-0.775105	-0.0833484	-1.51189	-0.428994	-1.56927	-2.13693	0.88776	-2.42554	-4.4247	0.328401	-1.5209	1.81882
b0384	psiF conserved protein	0.416995	0.59555	-2.95483	-1.58032	-0.853953	-1.87648	-2.26461	-1.28322	-1.82344	0.0727121	-1.46115	-0.60361	-0.367735	0.11876	-0.12039	-2.72888	3.13549	2.51449	-2.25259	0.354188	-3.10211	-0.914011	-0.938162	0.157771	0.0270597	-0.13339	-0.552411	-0.316392	-1.70923	-1.19857	-4.13135	-3.60951	-0.0631493	-0.676476	0.403471	-1.5953	0.692637	-1.72962	-3.40791	0.623133	3.46429	-1.24346	-3.10272	-2.46786
b0385	adrA predicted diguanylate cyclase	0.157709	0.33488	-6.35975	-4.20546	-3.42934	-0.301074	-2.65902	-0.981442	-4.55029	-3.69041	-1.87901	-4.3721	-6.06743	-1.70538	-2.03129	-6.06163	0.428802	0.20342	-6.33347	-7.56633	-4.22997	-0.0699851	-3.23308	-0.415759	-3.70023	-1.08332	-0.822624	-2.18359	-1.3726	-2.77304	-9.62254	-7.79932	-2.95451	-6.69489	-2.90559	-4.26693	-3.5502	-2.73623	-7.82983	-3.78269	-2.18026	-4.67967	-0.908055	-3.77683
b0386	proC pyrroline-5-carboxylate-reductase	0.292937	0.74218	-1.29413	-1.95297	-2.10487	-1.68282	-3.36647	-2.72904	-2.44032	-1.82343	-1.37446	-2.06456	-1.53075	-1.523	-1.46229	-1.69049	-1.45093	-0.664058	-2.47864	-1.70463	-4.19311	-2.44157	-0.622072	-0.994659	-0.0649139	-1.19564	-1.02101	-0.271975	-0.311812	0.129639	-1.88909	-1.34973	-2.95268	-3.27359	-1.66768	-1.71759	-4.1068	-0.373612	-2.16012	-1.63264	-0.189383	-0.234174	-3.20539	0.406365
b0387	yaiI conserved protein	-0.987008	0.803667	-0.161894	0.240758	-0.497099	0.0891056	-2.14173	-0.869339	-0.229731	-0.546438	0.516646	1.67666	-0.29315	-0.879395	-0.682145	0.401036	-0.512349	0.246135	0.361056	-1.35673	-2.16339	-0.6155	0.0493831	0.044358	0.633259	-0.789891	-0.168871	0.333451	-0.594649	0.301616	-1.47258	-0.515562	-0.8724	-1.07647	0.944111	-0.488412	-2.09448	-0.236624	-0.475264	-0.219708	-0.510192	-0.226358	-1.58935	1.14619
b0388	aroL shikimate kinase II	-0.768337	0.586922	0.158151	3.04226	0.19777	-0.253555	-1.26599	-0.600814	-0.707022	-0.480788	0.845148	0.845315	-0.054406	-1.24569	-1.22759	-0.824791	0.6803	1.44779	-0.402257	-1.91286	0.466572	0.564633	0.588414	1.0173	2.16283	1.64842	1.76455	-0.378745	-0.195125	0.303721	-2.37727	-1.45958	-0.0195546	0.156394	0.0833175	0.844498	-2.13336	0.207269	-2.22871	0.3276	-0.5979	1.12057	-0.922703	2.01227
b0389	yaiA predicted protein	0.310549	0.328064	-2.19478	-0.644405	-2.25472	-1.49196	-3.62009	LQ	0.0240596	-1.33331	-1.21492	0.135168	-1.73923	-2.39849	-1.64928	-2.59357	4.49134	2.71631	-0.879901	-3.10677	-3.73686	-2.17106	-0.68162	3.32317	0.0835475	-0.145293	-0.608839	-0.142989	0.625351	0.241899	-4.07609	-3.25711	-0.118512	-0.204564	-1.36521	-0.00153097	-3.28291	0.398231	-2.99401	-1.03715	-1.52961	-3.26241	0.554067	1.49648
b0390	aroM conserved protein	-0.0798608	0.831698	-1.53867	-0.578091	-0.348659	-0.0704139	0.425781	-0.108536	-0.250229	-1.49655	0.463477	-0.87717	0.786754	-0.238966	-0.484616	1.12246	-1.54569	-0.835765	-0.0651057	-0.0315831	-1.57015	0.355419	0.335198	1.23359	-1.47233	0.779768	0.571147	0.669635	0.153085	1.48667	-1.89815	-1.08588	0.137744	0.754336	0.742288	0.0701443	0.146363	1.03389	-0.638019	-0.914909	-1.4932	-0.703137	0.307268	1.17206
b0391	yaiE conserved protein	1.27756	0.47524	-2.75525	-1.55115	-1.45032	-1.50408	1.6575	-0.170829	-2.05038	-2.93834	-0.995411	1.37252	-0.314713	-0.358663	-0.499044	0.220523	-3.99887	-3.00867	-0.0455247	-3.80946	-0.955278	-2.62009	-0.335833	-1.38134	-2.04023	-1.82603	-1.41972	-0.769912	-1.15849	-0.739193	-0.584796	LQ	-2.57026	-2.83997	-3.57111	-1.21563	-0.919077	-0.347211	-2.83582	-0.0248949	-0.993227	-2.10807	-1.44101	1.73917
b0392	ykiA predicted protein	1.97169	0.432444	1.68913	-4.50667	-2.15355	-2.38376	0.581645	-0.790009	-0.324997	-2.86851	0.251767	-4.59576	0.497016	-1.84114	-2.83846	1.6421	-5.12388	-4.89342	-1.83984	-2.16643	1.42665	-1.95754	-1.2248	-2.32673	-2.12967	-1.35985	-2.31699	-0.580953	-1.24785	0.35827	-1.04001	-2.32723	-1.34157	-2.86395	-2.81965	-0.957572	-2.43094	0.89443	-1.5561	-1.30428	-3.22166	1.82686	-2.67805	2.77227
b0393	rdgC nonspecific DNA binding protein; nucleoid component	0.386286	0.312281	-3.30258	-3.6179	-2.22913	-2.21625	-5.32565	-3.02806	-3.44239	-1.97096	-0.637052	2.21448	-0.522238	-1.20451	-0.928149	-4.11921	-4.97551	-3.70303	-1.69115	-6.36399	-3.45534	-4.48223	-1.30564	-3.28824	-1.72091	-0.441247	-0.465418	-1.94449	-0.648904	-1.9039	-2.86699	-1.12905	-3.30113	-2.98594	-3.28924	-0.648972	-1.12781	-1.44695	-3.65355	0.79882	-4.67751	-1.42872	-3.52189	1.80233
b0394	mak manno(fructo)kinase	0.162135	0.295212	0.100066	-0.530044	-2.59316	-2.93352	0.565332	-1.00357	-4.83311	-0.149307	0.694734	0.741174	0.686032	0.979244	1.96377	-1.8273	-3.13508	-2.07818	-3.90285	-6.45513	-1.77173	-4.26738	1.1749	-1.25236	1.66398	-1.52556	-0.183698	0.87819	-0.704962	-1.39532	1.91401	3.20732	-0.556321	-0.0281156	1.99255	0.225656	-3.74876	1.87658	1.26237	2.34058	-6.26318	-0.396829	1.21567	5.47948
b0395	b0395	0.33152	0.30781	0.38084	-1.22568	-1.32321	0.255804	-2.0004	-0.564111	-1.53758	-0.419655	-0.425522	0.747938	-0.9301	-1.16061	-1.59805	-1.74197	-2.67741	-2.01162	-0.783321	-1.62036	-1.1987	-2.39876	0.384185	-1.42756	0.124423	-1.89121	-1.34219	-2.35736	-0.0843303	-0.355331	-3.27743	-2.74885	-3.56386	-1.77527	-2.31812	-1.38851	-3.01139	0.257388	-2.60281	-0.3268	-3.00582	-1.85726	-1.87285	-0.772391
b0396	araJ AraJ MFS transporter	1.64922	0.249442	1.03012	0.524638	-1.35898	-0.451913	-2.0691	0.419057	-5.40122	-6.83305	1.10601	5.45047	2.0106	0.581876	0.456783	0.465084	-3.02137	-3.44341	1.10437	4.27118	-0.732244	-1.43854	1.81854	-0.289038	2.40711	-1.98904	-1.27156	-2.99738	0.00310788	1.45005	-5.40782	-6.2509	-1.61952	-0.56293	-1.62078	-0.686727	2.167	0.20248	0.834422	1.27136	-4.21145	1.78722	-1.66688	2.64079
b0397	sbcC ATP-dependent dsDNA exonuclease	-0.840836	0.448825	1.49637	0.889306	1.81967	0.0250204	2.33425	1.71308	-1.10708	2.06749	1.65075	2.2353	0.732021	1.01315	0.908815	0.60394	0.407875	0.518806	2.46185	-1.21753	-0.422417	-0.610543	1.54088	0.749235	2.29917	1.08305	0.757578	1.72423	2.73046	1.37999	-2.67518	-2.81467	1.7262	3.5566	3.80536	1.1048	-1.934	1.84474	-1.58239	3.03046	-2.19979	1.56073	-1.62839	0.931361
b0398	sbcD ATP-dependent dsDNA exonuclease	0.0320366	0.607485	1.18016	0.718536	0.143738	-0.475193	2.54073	0.331891	0.90331	-1.92408	0.466952	-1.81048	-0.552566	-0.162019	0.00437444	0.948236	-4.64988	-3.77237	-0.870042	-3.3541	-1.8013	-0.67169	0.348594	-1.23584	-0.712674	-0.535681	-0.335966	-0.611193	-1.849	0.618667	0.613511	0.955484	-0.149875	-0.737136	-0.763731	-0.505078	-1.23038	0.578775	0.348094	-0.558624	-4.68393	-0.932599	-1.22646	-1.08009
b0399	phoB PhoB-Phosphorylated transcriptional dual regulator	-0.479086	0.645826	0.683045	1.58481	0.569855	-0.0887742	0.980695	0.242708	0.403673	-0.833111	0.719273	0.87807	0.861046	0.0272452	-0.138461	0.918177	-3.06546	-2.73991	0.129376	-3.59961	0.912352	-0.828382	1.35061	-1.26563	-0.381265	-1.35653	-1.04924	-0.0257344	-0.767609	-0.0396472	-2.98608	-2.78743	-0.079886	-1.45537	-0.0285554	-0.117926	-0.613914	2.14636	-0.864123	-0.796415	-3.81811	2.00002	-2.19829	-0.841897
b0400	phoR PhoR-P his	-0.271044	0.295129	-5.20264	-3.31484	-3.2587	-4.55745	-3.87357	-1.20956	-4.10498	-3.83088	-0.988815	0.955356	-0.926553	-3.24185	-3.47809	-0.9389	-0.935659	-1.43249	-4.69172	-1.39187	0.20215	0.864131	0.201375	-2.57958	-4.42041	-4.9095	-4.21561	-0.356883	-0.845316	2.66424	-1.13479	-2.25678	-3.15216	0.779427	-1.48269	-1.00968	-6.53681	-1.18554	-6.36574	-2.1073	-9.02281	-0.723169	-4.65612	-3.43628
b0401	brnQ BrnQ branched chain amino acid LIVCS transporter	-0.0969484	0.464344	-2.56285	-0.438375	-0.522275	-1.36296	4.68201	1.32808	-0.212934	-2.57949	-1.92609	-3.34196	-2.94011	-1.22277	-1.08132	-2.24918	-5.55506	-4.56685	-3.46558	-5.4329	2.67563	-4.13829	0.0490793	1.15947	3.31235	0.703171	1.42361	0.935404	1.06622	-3.19281	1.03836	1.31555	0.462331	-4.23124	0.522428	-2.14631	-5.12225	1.42065	-1.72729	-2.22064	-1.62829	1.25947	-3.54695	-1.00889
b0402	proY ProY cryptic proline APC transporter	0.440484	0.27847	-5.78482	-2.55519	-1.48863	-2.28199	-0.325272	-3.22043	0.0841038	0.357679	-3.61519	-0.247259	0.290781	0.348411	0.59505	0.870758	0.13086	-0.106892	4.37195	-5.09091	3.41548	-5.8815	1.33612	0.487389	1.84922	1.53719	1.80221	1.17092	0.627302	-3.88298	-3.10009	-2.74034	-0.92683	-4.76181	-9.01373	2.47996	-7.56691	-0.227471	-0.885617	-0.599152	3.32373	1.29955	-2.99587	1.38042
b0403	malZ maltodextrin glucosidase	0.354513	0.59241	-1.11046	0.185932	LQ	-0.430566	-1.8286	LQ	LQ	1.69598	0.20393	-1.26164	0.0756572	-0.545613	-0.281385	-0.859521	-1.29519	-1.0327	0.181957	-5.43035	-1.14759	-1.00091	0.0724158	-0.70265	1.06051	-0.62338	-0.194286	LQ	-1.56056	-2.03809	-3.97268	-3.2248	0.767522	0.688956	0.392251	0.309991	-4.46322	0.577638	0.284771	-0.763672	-6.35025	-0.473459	0.563209	-1.5183
b0405	queA S-adenosylmethionine:tRNA ribosyltransferase-isomerase	-1.04718	0.642052	2.36331	1.05532	0.10581	1.82997	-1.43578	1.10208	-0.164052	1.81858	0.349882	-0.221822	-0.573933	0.23433	0.404403	-0.780723	-1.13377	-1.12515	0.853486	1.39724	1.71119	0.263494	1.59012	0.90332	-0.257075	-0.303284	-0.233602	-0.585278	-1.2951	0.799375	-3.34878	-2.88683	-0.216223	1.62458	-0.464958	1.0415	-2.89677	-0.041927	-0.833742	0.816796	-2.52559	-0.175125	-2.04154	-1.14432
b0407	yajC Sec Protein Secretion Complex	-1.42937	0.619875	0.869671	-0.0602471	1.11434	0.801272	-0.0215762	-0.592688	1.17404	0.695813	0.0223486	0.888021	-0.389519	0.362819	0.37049	0.864984	-0.919426	0.28439	0.801132	5.92231	-0.928209	-0.239335	0.24444	0.256018	0.427082	-0.632894	0.122544	0.0673791	0.862864	0.834224	-1.03235	-0.604248	0.339701	-0.118314	-0.415706	0.178013	-0.963522	1.01229	-0.425924	0.410136	-0.47865	1.01733	0.0806416	0.349316
b0408	secD Sec Protein Secretion Complex	-3.69788	0.677496	0.386961	4.13111	1.7943	1.98269	1.34405	1.65593	0.390862	2.53182	1.32623	2.41895	0.910721	2.66935	2.42845	1.07533	1.68775	1.71869	2.19765	4.48212	-0.0918508	0.693876	2.44109	2.97563	2.19098	1.91168	1.48423	0.641658	2.48476	2.54571	1.20301	0.08698	0.0771774	1.3156	-0.921114	1.42492	0.0901328	2.83279	0.350439	2.38638	2.86769	0.841537	1.67619	1.18081
b0409	secF Sec Protein Secretion Complex	-3.18955	0.453845	1.69462	6.84938	2.16183	3.37353	2.66563	3.3857	1.58342	4.30265	2.63786	4.08069	2.74557	3.54407	2.90432	1.05769	1.43383	1.39978	2.23482	5.25294	-0.443901	0.245084	3.86659	1.13306	3.54888	1.53274	1.20811	3.18516	2.73778	3.99248	0.819775	0.179091	0.621692	1.11118	-1.23178	4.44976	-0.616292	3.57947	-0.562588	2.92106	0.786917	0.985308	1.89525	3.36526
b0411	tsx nucleoside channel; receptor of phage T6 and colicin K	0.662858	0.399461	1.16179	-1.09547	-1.11407	0.306648	-2.88115	0.651557	1.71705	1.84624	-1.28428	1.79042	-3.50565	-0.856341	-1.40818	-1.37161	1.47039	1.07238	-3.60658	-2.40089	-1.76523	-2.71449	-1.13916	-3.30035	0.739494	0.219539	-0.0868383	-1.82181	-0.146371	1.50051	0.0925707	0.0391369	1.16837	-2.37448	-1.51293	-1.37204	-1.97235	0.995225	-1.97776	-0.0523406	2.12332	-3.56933	-1.99817	0.713578
b0412	yajI predicted lipoprotein	0.969817	0.843816	-1.7502	0.695161	-0.85455	-0.343277	-0.973337	-0.339363	-0.305785	-0.295598	-1.45846	-1.62387	-1.40707	-1.1462	-1.51924	-2.58183	-2.43438	-2.24051	-1.06549	-0.422014	0.771222	-0.603881	-1.0106	-2.01298	-1.25888	-1.38448	-1.64557	-1.03741	-0.355978	-1.7002	1.35918	1.22502	-2.20505	-1.48046	-1.79691	-2.39906	-3.92989	-0.801105	-0.846023	-2.71207	0.44859	-2.31824	-0.634289	-2.16108
b0413	nrdR DNA-binding transcriptional regulator	-1.55182	0.647112	6.09159	7.34246	4.59318	5.21499	6.03392	5.61002	4.20908	5.32215	-0.0383748	1.10425	-0.406379	1.48695	1.37818	-0.409579	4.10708	3.90465	1.52503	3.80808	2.447	0.113682	0.821588	-0.243185	1.51473	1.15783	1.23729	0.563301	1.63165	1.13865	-1.04658	0.162651	0.888426	0.684167	-0.716811	0.956819	0.833981	1.82399	0.131151	1.19539	0.0208679	2.27523	0.289946	1.10537
b0414	ribD fused diaminohydroxyphosphoribosylaminopyrimidine deaminase / 5-amino-6-(5-phosphoribosylamino)uracil reductase	-2.68079	0.884751	2.84877	3.62565	1.67472	2.44898	0.916699	2.00232	2.32265	3.59414	-0.177931	1.27027	-0.326913	0.741793	0.696543	-0.712905	1.25516	1.67184	0.924192	-0.386528	-0.498742	-0.607218	0.750884	-0.677595	0.964126	1.03551	1.18803	0.109691	1.05671	1.19786	-0.866249	-0.686434	-0.639599	0.102008	0.692813	-0.320478	-0.861787	1.32161	-0.794933	0.904519	-0.508474	0.0202359	0.384109	-0.366027
b0415	ribE 6,7-dimethyl-8-ribityllumazine synthase	-2.25991	0.764347	0.534931	1.34156	0.233469	0.793111	1.13464	2.17744	0.824273	2.2292	-0.086387	1.20238	-0.0197626	0.973012	0.834939	-0.392502	0.894599	1.08954	0.945325	-0.374932	-0.432749	-0.61025	0.80511	-0.682587	0.963617	0.814003	0.812477	-0.2181	1.11082	1.30562	-0.800833	-0.727802	-1.11751	0.179384	-0.830774	-0.221554	-0.648544	1.29408	-0.867771	0.637161	-0.324021	-0.230559	0.342518	-0.272514
b0416	nusB transcription antitermination protein NusB	-2.08916	0.607287	1.90718	3.90054	1.88593	1.67139	2.9945	1.37697	1.7202	2.70691	0.368957	1.73205	0.351331	0.614409	1.08996	0.781943	-0.0887384	0.696498	0.894247	-0.283746	0.154623	0.205968	1.04097	0.0982519	0.924632	-0.442593	0.668308	1.19765	1.16175	1.40349	-1.55708	-0.560956	0.0336434	0.110365	-0.0763778	0.158536	-0.312666	1.78263	-0.379488	0.734021	-0.279543	0.758351	-0.0938297	1.14715
b0417	thiL thiamine monophosphate kinase	-2.84678	0.597656	1.06976	5.78234	LQ	4.12512	9.39829	3.40427	LQ	2.7279	-0.113874	4.14296	-0.530301	1.86889	2.0753	1.36902	3.41082	2.99403	2.453	2.89705	-1.48616	2.62679	3.07988	2.64583	3.615	2.04033	1.97751	LQ	1.20608	1.95921	-0.52356	-1.79109	LQ	2.27618	LQ	0.197379	0.805205	2.19605	-1.32691	2.64418	0.0124682	-0.767025	0.0574121	3.06169
b0418	pgpA phosphatidylglycerophosphatase A	-0.0956496	0.529652	-4.33779	-1.94891	-0.809333	0.627417	-1.96554	-2.51329	-3.18808	1.20616	-2.59389	-0.172148	-2.57606	0.952644	0.641251	-0.623333	-1.9306	-1.25934	0.691483	-0.739643	-4.95038	2.95687	-1.62308	0.162284	1.13495	1.32707	1.0169	-0.918223	-2.46369	-0.697842	-5.23026	-4.17153	-0.253428	-1.59317	-0.628282	-3.59633	-2.85429	0.953717	-1.89135	-3.18862	3.902	-3.77428	-3.55895	1.57622
b0419	yajO putative NAD(P)H-dependent xylose reductase	-0.408218	0.440771	-0.975928	-1.19241	0.215707	1.17126	-1.10964	-1.1854	-0.175409	1.15597	0.84335	-1.0826	1.52962	0.0299232	0.0584965	1.7605	-0.243546	-0.281333	3.63129	-3.03638	-3.31613	0.959552	0.155173	0.675547	-0.694304	0.318543	0.206125	0.606912	-0.586353	-0.904239	1.227	2.13639	-0.205548	-1.60558	0.0859328	-0.929186	-1.93015	0.159961	0.626641	-0.5847	-0.109091	0.72352	-1.8857	-2.14379
b0421	ispA geranyl diphosphate synthase / farnesyl diphosphate synthase	-2.46798	0.584131	5.75803	7.57302	4.73483	6.21957	7.87544	7.25025	2.93329	6.93775	0.280187	1.77165	-0.530478	1.50494	1.52547	0.165858	1.33937	1.35976	1.9724	-0.424146	2.52523	-0.731154	2.01045	1.15443	1.64937	0.612903	0.818089	0.637229	1.74655	1.89325	-0.919282	-1.60218	-0.569247	0.640404	-0.787042	0.785171	-0.878162	2.5185	-0.90631	1.28441	5.165	-0.118891	0.642991	1.56832
b0422	xseB exonuclease VII, small subunit	-1.19806	0.857247	5.36719	5.43166	3.30173	3.45808	6.66988	5.99032	3.94195	4.98066	1.3966	0.770771	-0.124241	0.12693	0.191714	-0.0927289	-0.278565	0.0343635	5.07703	-0.385647	2.16675	-0.719873	0.853674	1.90515	2.35769	1.59851	1.80597	1.44569	0.559639	0.681071	-0.735878	-0.702332	1.00966	4.0308	2.12296	-0.409484	-0.746982	1.19045	-0.66222	0.765967	-0.356172	0.526192	-0.151384	1.65147
b0423	thiI ThiI	-0.0564012	0.538508	-0.572107	0.506089	-0.126151	LQ	0.579499	LQ	-0.767723	0.829611	-0.747752	0.597522	-0.949141	-0.770793	-0.627384	-1.91749	-0.752689	LQ	0.405237	-1.72589	-0.372523	-1.339	0.55254	-1.09217	0.582688	-0.229758	-0.0208589	-1.55574	0.376655	0.971514	-2.05622	-1.76311	-1.26422	-0.293664	-0.734272	-0.974135	-2.02119	1.38313	-1.6327	0.659151	-1.87198	-0.520061	-0.301529	0.470751
b0424	yajL conserved protein	-0.979227	0.5602	1.38768	0.873702	2.05242	1.52355	-1.58125	0.799297	0.381704	3.98275	1.57858	1.12683	0.74791	1.19688	1.01041	-0.250847	0.507223	0.985403	3.17221	-1.77579	3.58433	-1.24601	2.03534	1.4883	1.5591	1.10537	1.41847	-0.841635	0.63311	1.61885	-1.43549	-0.469917	0.108637	0.559284	2.31627	0.109279	-2.78962	2.88291	-0.677804	1.06017	-2.20017	-1.64032	-0.6508	1.71291
b0425	panE 2-dehydropantoate reductase	-0.0404034	0.323528	3.82362	2.14153	6.20167	5.53743	0.282459	-0.298059	8.13838	8.4965	0.0969672	-3.09857	-4.89794	0.616969	-0.0425996	-4.49374	5.17053	4.62885	3.76734	2.19845	1.6696	-5.80113	1.40045	-0.698695	1.40985	2.43052	2.19958	-1.95659	-4.3196	-1.15705	6.86966	7.409	1.72452	4.05383	6.72397	-1.66243	-3.74609	1.65504	-2.48778	-1.94076	-5.38004	-3.89331	-4.64602	7.8287
b0426	yajQ nucleotide binding protein	-0.00597418	0.568331	1.93879	0.227715	1.65172	0.497505	-1.88867	2.20051	2.02382	1.66955	0.183922	3.37062	-0.220307	0.324505	-0.00798165	1.4827	-0.918613	-0.423186	-1.5231	-1.03296	-3.09385	-1.6155	-0.362053	-1.27816	2.57697	0.628999	0.385665	0.199348	0.543724	0.713712	-3.40023	-2.01131	1.0004	-1.62853	0.0703231	-0.161916	1.90991	0.338598	2.52226	-1.01581	-2.73804	1.80226	1.20738	-2.10671
b0427	yajR YajR MFS transporter	-0.358976	0.438138	5.46371	6.2527	4.98354	4.33141	5.18273	3.27611	3.3113	7.42463	-0.349059	-0.287164	0.454275	1.95625	2.32685	1.60061	3.34741	3.72964	-3.19097	-1.10487	1.78218	-2.85662	1.90423	-1.39132	0.805125	-0.706845	-0.869789	2.21756	-3.86785	0.192464	-0.693192	-0.155649	-0.0614443	0.565688	1.99372	-1.01164	-4.93168	3.29745	-2.12262	1.21626	4.33257	3.72794	-3.75506	-3.58625
b0428	cyoE heme O synthase	-0.734368	0.308178	19.7213	20.3842	17.851	19.218	22.2403	15.4341	19.1008	16.7177	-1.08953	-3.31099	-0.523654	-3.6949	-4.46141	-4.67719	-2.29199	-3.35675	-2.76169	-6.58947	-7.77037	-6.37025	-0.225389	4.27504	0.115039	-2.36096	-2.46148	-1.60782	-4.32766	0.949439	-5.76016	-7.16976	-0.879115	-3.31765	-0.379803	-0.606608	2.79375	0.200932	-3.22357	-3.47636	-6.70999	2.88542	-5.80295	-2.832
b0429	cyoD cytochrome bo terminal oxidase subunit IV	0.672251	1.15089	2.75976	2.91147	2.34579	2.08957	3.3971	1.78773	3.854	1.8642	-1.90689	-1.22427	-1.6355	-1.80838	-1.40723	-1.41375	-1.71706	-1.35858	-1.45561	-2.05963	-1.90368	-1.96204	-0.900116	-0.817184	-0.98066	-1.63522	LQ	-1.5244	-1.2753	-1.24694	-2.37121	LQ	-0.705651	-1.61993	-1.5304	-1.77553	-0.95868	-0.773126	-0.276289	-1.38318	-1.97259	-1.50388	-2.02689	-1.53606
b0430	cyoC cytochrome bo terminal oxidase subunit III	-0.240681	0.455128	10.8021	12.0907	11.1532	11.8226	12.0018	7.2143	9.60046	10.7269	-4.45057	-4.01248	-4.2331	-4.88062	-5.22862	-4.89427	-5.05762	-5.13978	-4.42814	-4.89063	-5.1536	-6.00349	-1.38909	-3.40267	0.239576	-2.95689	-2.6449	-5.47654	-3.30582	-3.78587	-6.70038	-6.60903	-2.05382	-4.20265	-1.41271	-5.61245	0.269416	-2.31701	-4.29516	-0.432026	-5.30537	-2.7629	-5.45846	-3.86413
b0431	cyoB cytochrome bo terminal oxidase subunit I	-0.615826	0.336806	15.8629	18.5174	16.6517	16.7103	17.1279	13.5482	16.8293	16.1801	-6.69811	2.23861	-9.00321	-2.47783	-4.85291	-6.72253	-3.03414	-2.94527	-0.80231	1.5363	-9.73235	-8.21729	1.64613	1.15787	1.54768	2.22439	2.08191	-3.802	-2.18426	-1.36433	-1.24791	-0.917087	1.65656	1.55256	0.321521	-4.53468	-8.49126	-0.75998	-4.11202	-3.28664	-2.08092	0.644025	-5.69241	-8.08056
b0432	cyoA cytochrome bo terminal oxidase subunit II	1.04418	1.03436	5.14043	LQ	4.0837	LQ	5.99605	LQ	4.77986	3.76633	-0.31479	-0.922474	-0.55858	-0.52974	-0.510241	1.09879	-0.0766014	-0.0865775	-1.58309	-3.20354	-1.46185	-1.81597	-0.488322	-0.527266	-0.997099	-0.953291	-0.837603	-0.58059	-1.34403	-1.40591	-0.460853	-0.247075	-0.048343	-0.0612627	-1.10547	-0.901461	-3.23166	-0.281622	-3.16358	-1.93857	1.19917	-0.388593	-0.134427	-2.04912
b0433	ampG AmpG muropeptide MFS transporter	0.0679805	0.40074	0.613798	9.70325	7.38605	7.18968	-1.36713	5.7303	-0.191299	7.46173	-6.03845	-5.2168	-7.05792	-5.34368	-5.15176	-7.93409	-4.82465	-4.08306	-4.7054	-4.47812	2.34028	-5.31166	-0.429796	-2.39053	-2.15752	-2.1706	-2.63966	-1.48715	-0.534814	1.90066	-5.10685	-6.51047	-1.63491	-2.40783	-0.00332058	0.196248	-6.56993	-1.95989	-1.63584	0.204594	-6.24012	-2.06419	-7.02383	-0.843289
b0435	bolA BolA transcriptional dual regulator	1.23633	1.25646	-0.717348	-1.63465	-0.889507	-1.05143	-2.04247	-1.06506	0.248327	-0.319603	-1.22181	-1.20608	-1.75439	-1.63765	-1.51884	-1.30152	-2.16771	-1.68421	-1.71772	-2.20895	-1.21206	-1.13567	-0.655943	-1.93171	-0.393291	-0.584827	LQ	-1.05538	-0.371804	-0.748689	-2.30347	LQ	-1.29329	-1.67523	-2.06401	-0.954474	-0.169958	-0.456679	-2.27497	-1.28633	-1.14952	-1.8861	-2.02827	-0.939466
b0436	tig trigger factor; a molecular chaperone involved in cell division	-0.74975	1.26579	-1.14228	-0.897497	-0.801789	-0.410715	-1.06306	-0.763824	-0.487537	-0.063324	-0.939784	-0.891818	-1.04032	-0.3844	-0.77981	-0.774817	-0.832966	-0.858785	-0.55479	1.54209	-1.60882	-1.63088	0.511521	-0.556703	-0.0700291	-0.654251	-0.733175	-0.330903	-0.371189	-0.0561776	-1.78182	-2.03033	0.16918	-0.32059	-0.027045	0.0236981	-0.268088	0.407539	-0.180254	0.231838	-1.32534	0.92975	-1.22897	0.886248
b0439	lon DNA-binding, ATP-dependent protease La	-1.87572	0.777582	0.122751	0.488816	0.415273	0.441759	0.791451	1.47703	0.898413	1.46075	1.93556	2.10463	3.2551	2.74915	2.47379	2.15876	1.48201	1.2049	1.0399	-0.748035	-0.646537	-0.605866	1.58667	0.343256	1.15808	0.530087	0.288305	3.2228	4.09237	4.83487	4.12855	4.27502	-0.158599	0.151642	0.0604752	-0.198457	0.0263889	1.63797	0.0367934	1.17424	5.96778	0.319681	2.15886	-0.479788
b0440	hupB Transcriptional dual regulator HU-beta;, NS1 (HU-1)	0.849938	0.280168	-1.70767	-5.62409	-5.75261	-4.53495	-4.79624	-4.28199	-3.44048	0.22792	0.531386	-0.548837	-2.35873	-2.4563	-2.80268	-1.01054	3.27272	2.74387	-0.947295	-7.87244	-8.61902	-5.18187	-2.3999	-3.80956	-1.46122	0.327599	-0.807962	-4.56625	-4.28884	-2.64917	-8.9979	-7.67293	-2.12902	1.99148	-0.654543	-3.32277	-8.21147	-3.9257	-8.09743	-1.9342	-5.56805	-3.46018	-3.81141	-7.53469
b0442	ybaV conserved protein	-1.0169	0.857734	0.750077	0.305903	1.04311	1.46065	-0.580694	-0.144134	0.648021	1.20025	1.44537	2.08648	0.84282	1.24235	1.23698	2.19412	0.58208	0.84781	0.172784	2.45111	-0.269899	0.152229	1.67559	0.280615	0.820679	0.856458	1.11344	0.281001	0.548626	0.65258	-0.698613	-0.307574	0.179059	1.26794	-0.240674	0.928907	0.820489	2.44576	-0.598734	0.748789	2.2993	2.02581	0.00856006	2.96005
b0443	ybaW conserved protein	-0.363575	1.36402	1.36178	0.223964	1.64987	0.54513	-0.769032	1.14271	LQ	0.802407	0.836467	1.74631	1.19087	1.5292	1.36249	1.21325	2.09404	1.71245	0.389684	-0.378593	-0.977449	1.23942	0.972713	0.497165	0.692166	0.8692	0.653066	0.744044	1.36242	0.484824	1.88618	1.8044	0.951539	0.00501134	1.44238	1.14861	1.75656	0.226471	1.30816	0.534626	1.9642	0.249504	1.20238	1.05602
b0444	queC enzyme in preQ 0 biosynthesis	1.19169	0.515309	-1.49756	-1.21188	-1.6642	-1.52083	-0.556899	-2.48145	-1.84887	-0.134599	-1.53254	-1.21039	-0.646159	-0.843558	-0.532532	0.362683	-2.40978	-1.8328	0.224525	-1.3242	-2.32819	-2.26527	-0.738156	-4.2048	-0.898678	-0.633872	-0.352956	-0.295925	0.781376	-0.72259	-5.39378	-4.80554	-2.95266	-2.89007	-2.49706	0.327796	0.578759	-1.20393	-0.235527	-2.02051	0.732823	0.874311	-4.58215	-0.186082
b0446	cof pyridoxal phosphatase / HMP-PP hydrolase	-0.560589	0.347098	1.0758	0.194776	0.868181	2.39404	-2.10695	2.99949	1.24261	1.7724	1.11848	2.50347	1.70542	1.31906	1.27854	2.43281	-2.10714	-1.55398	4.214	-4.76143	2.8028	1.60209	1.98701	3.67149	2.22575	-0.0157358	0.267634	0.615061	3.13804	1.01277	-1.23425	-0.401468	-0.210145	-0.452217	-2.57416	3.69297	-3.14523	3.04568	7.01052	0.0229687	2.273	4.11076	-2.59252	0.846461
b0447	ybaO putative LRP-like transcriptional regulator	-0.594037	0.361254	0.131734	0.35376	0.506915	1.25804	-4.24192	-0.197195	1.57498	3.10168	1.96188	-1.10135	1.8539	-0.403577	-0.535961	2.47413	0.242483	0.584238	1.50064	0.396793	1.22947	0.174486	2.19128	3.3527	-0.188066	3.06997	2.23326	-0.0201853	1.2771	-1.90998	-6.48766	-6.02164	-0.443657	-0.0920571	-1.097	1.16101	7.06194	-0.530457	-2.5075	-0.848779	1.73403	-0.957971	-2.9452	1.74584
b0448	mdlA predicted multidrug transporter subunit of ABC superfamily: ATP-binding component	-0.611542	0.557353	-1.08916	-1.05454	0.535535	0.698149	-2.5288	0.734761	-1.93111	1.42942	0.740083	1.32262	1.55127	0.944442	0.93717	0.718016	-0.123909	-0.28091	1.99252	1.45844	0.443299	1.01428	2.0488	1.49675	1.00861	1.12956	1.19658	1.04641	0.518581	0.305405	-1.17493	-0.948348	-0.621927	-1.39486	-0.660726	1.21311	-4.31624	0.0817567	-2.45807	0.291334	-1.19965	1.45218	-1.55252	1.89204
b0449	mdlB predicted multidrug transporter subunit of ABC superfamily: ATP-binding component	-0.412491	0.562735	-2.04315	0.870915	-0.19421	-1.02809	-4.70321	-3.1071	-2.64367	0.548099	0.348337	0.799384	0.471862	-0.125377	-0.00259254	1.21835	-3.00368	-2.91524	0.254735	3.32083	0.497826	-1.39707	0.523329	1.91951	1.79715	0.245009	0.414615	-2.12989	-2.27335	-2.0821	-1.07562	-1.33193	-0.456909	-0.61964	1.82315	-0.901977	-4.7692	-2.08638	1.65656	-0.88484	-1.00918	1.36225	-2.23584	0.585284
b0450	glnK uridylyl-[GlnK]	0.444122	0.741041	-2.1986	-2.00758	0.051509	2.01977	-3.13006	-1.43436	-0.258719	0.588976	0.64291	-1.77934	0.433342	-0.476006	-0.545223	0.0830691	0.334234	0.0406989	-1.68093	-0.17846	1.4777	-1.92374	1.07341	0.929247	0.808486	1.89251	1.47545	1.89327	-1.79492	-1.30084	-3.39024	-3.02556	-0.741924	-0.488894	-0.205149	1.18612	-0.0871517	0.568177	1.76065	-0.553486	-3.17104	3.05432	-1.41763	2.04487
b0451	amtB ammonium Amt transporter	-0.284296	0.468504	-0.666722	-1.81255	-0.836828	-0.585079	-1.80332	0.133843	-2.15618	-0.806698	0.261566	-3.28587	0.180278	0.205675	0.612995	0.373863	-4.75485	-4.22924	-2.63567	-5.20353	-2.03021	0.240217	1.75037	-0.909451	2.10655	1.49417	1.49279	0.525835	1.10652	1.39535	-4.57166	-4.52929	-1.75461	-2.25875	-1.40491	1.75077	-4.21141	1.35786	-0.703635	-1.75265	-2.69298	2.00821	-1.82932	-0.0567309
b0452	tesB thioesterase II	-0.720269	0.665891	1.97699	-2.04081	-0.904805	0.179489	-0.948728	-1.48486	0.403141	1.17839	1.11912	-2.11541	0.948897	-0.780823	-1.05668	0.0923438	-1.31486	-1.30877	-1.48534	-3.53712	0.0698515	-2.3146	0.185444	-1.01601	0.467541	0.351373	0.610409	0.0682847	-1.27058	0.0994373	-3.99926	-3.65875	-1.06591	-3.00182	-2.50769	0.583769	-2.78265	0.208594	-1.69749	-0.168904	-1.95134	0.669785	-3.01025	0.306474
b0453	ybaY predicted outer membrane lipoprotein	-1.12544	0.877408	0.295594	-0.511192	-0.140386	0.515062	-0.891541	1.04531	-0.0696801	0.78807	0.740909	0.288527	0.222369	-0.322847	-0.468706	0.316188	-0.467307	-0.654137	1.0916	0.612834	0.0715807	-0.849509	0.867807	0.297817	0.152248	0.478535	0.445525	0.796332	0.449393	1.13604	-0.943064	-1.22219	-0.330322	-0.61646	-1.40599	1.3508	-0.704709	1.34762	-0.482809	0.261811	-0.612756	1.46302	-0.54112	0.0958119
b0454	atl alkyltransferase-like protein	0.0049483	1.07361	-0.264686	-0.934305	-0.789647	-0.0734367	-1.7721	LQ	-0.258654	0.173839	-0.213486	0.72578	-0.311261	-1.0806	-0.755246	-1.13869	-1.85315	-1.15749	-0.179199	-1.79422	-1.67736	-1.5393	0.162936	-0.871386	-0.638752	-0.702757	-0.552974	-1.04849	-0.901303	0.359274	-2.16845	-1.56224	-0.469511	-0.198371	-1.43797	-0.461276	-2.14759	-0.0861561	-0.901299	-0.71696	-1.91909	0.579605	-1.26247	-1.29891
b0457	ylaB conserved inner membrane protein	1.99878	0.273071	-3.34814	-4.48539	-2.83799	-2.5435	-6.34216	-0.916899	-4.42987	-4.96473	-1.81028	-3.80091	-3.53978	-2.60466	-2.57391	-1.89602	-0.769136	-0.75646	0.357967	-0.528534	-2.53638	-0.981935	-2.21319	0.326807	-2.64202	-0.940631	-1.21069	-0.925612	-1.31152	0.357129	-1.26651	-0.770693	-0.845176	-1.05639	-1.4216	-1.76421	-3.87292	-3.49149	-1.07887	-1.28468	-0.42342	-1.82261	-0.110894	-2.01826
b0458	ylaC predicted inner membrane protein	0.451452	0.675772	-1.58109	1.21948	0.547751	1.9443	-1.51022	2.15533	1.92486	1.4031	0.886993	1.31813	0.44991	2.20398	2.13302	1.10508	3.6571	3.09955	-0.03938	0.0404913	2.52846	1.35229	2.55529	2.71121	3.30359	1.70701	1.21019	2.88962	2.76523	-1.05137	5.85339	5.13562	1.86054	0.249264	1.80656	2.75811	1.50709	3.67923	1.71953	2.51271	2.28364	1.80958	2.83494	-1.28939
b0462	acrB AcrB RND-type permease	0.00503781	0.462736	0.470001	0.855012	-0.206003	0.499363	-4.03717	-0.222294	-0.711216	1.5374	-2.58812	-7.39839	-2.86238	-3.61346	-3.02357	-4.60224	-4.15713	-3.36225	-2.60778	-8.34279	-4.39954	-0.806311	-1.5859	-1.43759	-6.25989	-4.58891	-4.04619	-3.56223	-7.88303	-5.89839	-8.715	-7.14741	-3.55864	-5.67427	-4.27838	-3.82762	-0.43369	-4.4728	-1.76792	-2.03441	-2.55747	-3.1929	-8.2169	-2.09008
b0463	acrA AcrA Membrane Fusion Protein	0.250647	0.436052	1.52699	0.912552	-0.11436	-0.0529771	-3.29746	-1.7775	-3.17916	-0.38066	-1.54515	-2.9901	-1.64168	-1.27392	-1.20043	1.64298	3.27153	3.79254	1.88369	5.70636	2.69422	1.93368	-1.02233	-1.10017	-1.75366	0.811859	1.87472	5.74291	0.555934	-2.50264	0.00997702	0.360626	-4.0999	-2.39182	2.33459	-1.15299	1.95132	-1.72441	-3.34343	-0.86025	11.2994	-2.7314	-4.33922	7.44008
b0464	acrR AcrR transcriptional repressor	2.19174	0.57505	0.179805	-1.865	-1.80566	-3.60919	-0.680481	-2.705	0.738803	-4.20744	1.99107	1.23559	1.4239	0.654437	0.0424622	3.71911	3.74164	3.82029	4.80441	3.9005	5.08624	4.13431	-1.98551	-0.0386625	4.45326	3.31708	4.09827	4.97196	4.92021	3.44844	3.72426	3.99427	-0.308252	-0.513558	2.21672	0.310616	2.95048	3.75387	-2.64892	-0.775628	6.10033	-0.212063	0.1104	6.27632
b0465	kefA KefA	0.327071	0.223961	-6.03442	LQ	-0.150851	LQ	-6.95686	LQ	-4.79163	-1.62547	0.14191	1.7623	1.25955	-0.521119	LQ	0.413968	-0.00600113	0.326948	1.43441	7.03557	0.377034	-0.906443	0.230417	0.801107	0.955338	-1.70151	LQ	8.02749	2.84805	0.75627	0.36441	LQ	1.14942	-2.07337	3.12505	-1.25265	1.9824	2.66737	0.239019	1.07404	11.2119	-2.85049	-3.35687	7.95662
b0466	ybaM predicted protein	-0.458209	0.77166	-0.186011	0.993828	0.778586	LQ	1.19413	0.352663	0.500502	1.07671	2.11275	3.33229	0.864168	0.350988	0.376828	0.99266	0.0598036	0.152461	0.865534	-0.187508	-0.60499	-0.344702	1.3751	0.620913	1.50932	0.184702	0.491354	-0.253247	1.37015	0.909987	-0.535248	-0.364029	1.13541	0.548235	0.223487	0.249931	-0.736181	1.88497	2.01967	1.5888	-0.532969	-0.147726	0.375854	-0.130789
b0467	priC primosomal replication protein N''	-1.03861	0.889888	1.75383	1.08868	1.67726	0.240569	-1.02184	0.761016	-0.0070658	2.27787	2.05507	3.45782	1.07372	0.831131	0.787564	0.862349	-0.736913	-0.176447	-0.510365	-0.661446	-2.01255	0.813413	1.58073	1.49916	1.85236	1.23581	1.09916	0.67108	0.183113	0.0299623	-0.699048	-0.456815	1.41627	2.9607	1.20141	0.811077	-1.50868	0.801761	1.37046	0.550225	0.606812	0.0380684	0.874854	0.334982
b0468	ybaN conserved inner membrane protein	0.156504	1.33999	1.32853	-1.22711	-0.558477	-0.693371	-1.37456	-0.27126	-0.711266	0.18746	-0.257308	0.0343231	-0.326608	-0.0718307	-0.00852466	-0.863927	-1.14727	-1.31401	-1.05591	-1.63661	-1.59244	-1.20839	-0.430281	0.493213	-0.787205	-1.06806	-0.952987	-1.1128	-0.808581	-0.512106	-1.13769	-1.26165	-0.862006	-0.0699233	-1.40772	0.200607	-1.69671	-0.301089	-1.71184	-0.296697	-1.18899	-0.527781	-1.37398	1.42704
b0469	apt adenine phosphoribosyltransferase	0.018837	0.365788	1.77593	0.531815	-2.15368	0.700684	-4.04347	-1.12114	-4.05702	-0.452266	-1.68262	3.96304	-0.96572	-1.41071	-2.00947	1.42941	-5.0466	-5.39171	-5.30448	-5.57059	-3.61848	-4.34627	1.30287	2.3067	-3.9074	-2.84828	-3.30818	1.95563	-1.0057	0.841045	-5.84311	-7.20922	-2.41674	0.337227	-3.45734	-0.490028	-7.98028	-2.95422	0.178427	-3.5035	5.94234	3.7282	-6.10678	2.55769
b0471	ybaB conserved protein	0.293185	0.332104	-1.10103	-2.79095	-3.98238	-2.96984	-5.23299	-4.14952	-2.9718	-3.97107	-6.31209	-3.10766	-1.52639	-0.952867	-1.70907	-2.99826	-5.30427	-5.55018	1.97832	-4.56643	-7.566	-5.00026	0.00716007	-3.97564	-3.44267	-3.68576	-3.90353	-3.76203	-2.94343	-0.457212	-6.39081	-5.86001	-4.96916	-4.94408	-6.10965	-2.565	-5.92967	-2.31483	-6.75255	-4.36021	-2.52315	-3.74989	-5.61203	-0.274148
b0472	recR recombination and repair	-0.609884	0.818733	0.320346	0.286477	0.554858	1.15922	-2.03232	0.099893	-0.000113739	0.0614315	-0.840762	-0.350992	0.881945	0.197573	0.171966	-0.514083	-1.28958	-1.08147	2.18061	-1.95632	-2.62806	-1.37784	0.496156	-0.757413	0.0416433	-0.554171	-0.58652	0.141237	0.197447	1.93688	0.835081	0.970397	-0.899505	0.826749	-0.612175	0.706922	-0.440074	-0.589723	-1.5639	-0.23568	-0.135746	1.34771	-1.86524	-0.00616122
b0473	htpG HtpG monomer	-0.0850565	0.594173	1.86463	3.29126	2.7227	2.03369	1.97919	1.30695	1.71927	1.66281	0.232968	0.882373	0.628282	0.370472	0.286961	0.55808	-1.32907	-1.80844	1.39423	-0.583434	0.348181	0.890319	0.32329	1.46939	0.734327	0.539472	0.414647	-0.445177	1.16423	0.706813	-2.52916	-2.99367	0.784866	0.0954533	-0.0425451	0.743329	0.239273	0.177402	1.30035	1.14204	-0.860906	0.156435	-1.54457	1.49477
b0474	adk adenylate kinase	-2.32781	0.796978	0.528638	1.81878	1.78106	1.93341	0.872966	0.942988	1.28986	1.89252	1.72697	1.12536	0.756886	1.08193	1.27172	0.489732	-0.0754756	0.331555	1.40201	-0.563407	0.0183013	0.0549252	1.03364	0.0962479	0.938361	1.57054	1.73214	0.39878	0.867725	1.01333	-0.790545	-0.709412	0.252116	0.399284	-0.157163	0.568175	0.754493	1.68825	-0.223697	1.15493	-0.215412	0.144229	0.034028	3.12821
b0475	hemH ferrochelatase	-2.13955	0.422931	3.57625	2.63069	2.02833	2.51051	9.1804	2.55249	1.30449	LQ	1.01901	0.677757	-0.639135	0.707742	1.03951	-0.0737871	-1.91021	-2.09308	0.687686	-1.92323	-1.32286	-1.50713	2.36575	-1.99217	0.766767	-1.35685	-0.998034	0.902939	0.76475	0.921714	-2.32004	-2.90688	1.4145	-0.49809	1.81584	-0.745815	-1.85539	1.69576	-2.29137	1.30112	-1.76996	-0.579281	-1.49391	0.56852
b0476	aes acetyl-esterase	-0.00885579	0.434967	-1.24867	-0.223973	-0.291217	-0.426495	-2.04533	0.624496	0.0510701	-2.42029	0.0181612	-3.89702	-2.47982	0.351492	0.40992	0.549694	-5.28751	-5.12765	-3.79238	1.38837	1.18377	-2.24584	1.11811	-0.0123234	-0.314305	-1.433	-1.74151	-0.247975	1.39913	-1.37791	-4.16966	-4.07289	0.139366	-3.32559	-1.70062	-0.0968934	-3.92054	1.30153	-2.7735	-0.22221	-6.41334	-2.03446	-5.31843	-0.966433
b0477	gsk guanosine kinase / inosine kinase	-0.415695	0.419494	1.84235	0.410689	0.995362	1.77361	-5.31877	-1.46511	-2.21455	0.52247	1.22079	0.0369227	-0.40627	1.2775	0.917947	1.68594	1.37237	0.913632	-1.50005	-4.38624	0.0825647	-1.46788	1.92299	-0.725743	1.44316	-1.61136	-1.58778	1.34798	1.16565	0.323265	-3.75464	-5.16067	-1.14663	-1.61985	-0.435536	2.04156	-0.387092	1.98185	1.2947	2.14416	-4.12655	0.889376	2.18255	5.22558
b0478	ybaL YbaL CPA2 transporter	-1.1774	0.78903	2.42633	1.26	1.52091	2.12599	0.32446	2.37246	0.0259525	0.888153	0.948011	2.27531	1.1308	1.82322	2.02758	0.976544	2.83881	3.24169	1.39856	3.93445	1.54976	1.9825	2.30682	1.94811	1.91937	1.61119	1.66758	1.10901	-0.232697	0.933207	2.22746	2.19607	0.540659	1.38818	0.322874	0.790327	-1.06779	0.600522	-0.0376091	1.90367	2.95764	1.52125	0.00171649	-0.252551
b0479	fsr Fsr fosmidomycin MFS transporter	-1.10859	0.946129	-0.107184	1.00989	0.666108	-0.0598108	-0.371864	0.393808	-0.645118	1.03919	0.834627	0.309786	0.824656	0.905517	0.997296	0.0348945	1.90293	2.02163	1.7852	-1.52729	1.80805	3.27384	1.37808	0.98003	1.36913	1.23224	1.20153	1.3109	-0.620594	0.921979	-1.03936	-1.07494	0.813107	3.00154	0.747782	0.358555	1.05424	0.132925	0.158155	-0.0629658	3.07469	1.13135	0.784332	1.19221
b0480	ushA 5'-nucleotidase / UDP-sugar hydrolase	-0.978238	0.674436	-0.3618	-1.88882	1.86282	1.59391	0.936398	0.389176	-0.000378116	1.70397	1.33978	1.33369	1.1083	1.5568	1.55329	1.31352	-2.02504	-1.96356	-2.00802	2.44425	2.13149	-0.649141	1.70286	-0.936757	1.44974	0.743635	0.416242	2.46274	1.12351	1.04171	0.905484	0.50155	0.024747	2.53513	2.46934	1.7067	0.933581	-0.162836	-1.0468	0.360048	2.64133	1.73397	2.30419	1.02855
b0481	ybaK Cys-tRNA Pro and Cys-tRNA Cys deacylase	-1.22291	0.608436	-1.33282	-0.439182	2.4418	4.08439	4.79376	-0.395948	0.462281	0.760783	0.837755	1.16831	-0.0193205	1.4528	1.48155	1.25549	-1.33601	-0.621788	0.526605	1.56788	-1.00141	-0.755134	2.23015	0.978534	1.67237	-0.0736224	0.405396	1.83802	0.822522	2.95817	-1.48604	-0.840776	-0.346905	0.914182	-0.208015	1.20959	0.493823	1.58421	0.924918	2.02984	3.34364	2.15652	0.533186	0.424189
b0482	ybaP conserved protein	-0.405082	0.45446	-4.21534	-3.20614	-1.58893	-1.2948	-0.920349	-3.83593	-2.21456	-3.14614	-2.26411	-4.52094	-4.06477	-2.85968	-2.51171	-3.44177	-6.44832	-5.48662	4.60302	-0.826312	-1.69086	-3.14483	0.357809	-1.68366	-1.65574	0.437404	0.364881	-2.14667	-1.18763	-0.144133	1.62248	1.13183	-0.644036	-1.88008	-4.80317	-1.70064	2.47502	-1.77203	-4.71663	-2.6376	-3.9826	1.99303	2.52332	0.0720815
b0483	ybaQ predicted DNA-binding transcriptional regulator	-0.220597	1.11334	0.435093	-0.322955	-0.47275	LQ	-0.617066	LQ	0.910357	0.211067	-0.969707	-0.20396	0.633156	-0.532431	-0.513157	0.484656	-0.725853	-0.655848	0.135067	-0.353358	1.74725	-0.900513	0.467382	0.6622	0.440554	0.773685	0.51041	-0.30762	0.582087	0.482449	-0.117045	-0.0506081	-0.73653	-0.714076	1.13114	-0.2665	1.6517	0.442016	-0.328	0.307577	-0.93651	-0.2104	-0.598257	0.318972
b0484	copA Cu +-exporting ATPase	-0.832506	0.338151	-3.94552	1.36609	-3.87269	-0.788918	-2.19946	-2.67615	-1.04504	-0.767669	-1.50682	-1.7772	-1.1687	0.626182	0.595293	-5.00918	-2.71042	-2.40509	-2.0403	-5.18809	-0.942442	-5.16684	3.45891	1.13181	-0.656621	-2.22924	-2.97921	-1.81885	-0.345837	0.138338	-4.34779	-6.13254	-3.54364	-1.80243	-3.69799	-2.39742	-2.30829	0.358428	-6.45441	-1.3482	-6.2583	1.62517	-4.37874	-1.03595
b0486	ybaT YbaT APC transporter	0.0884412	0.518139	-0.076123	-0.448531	0.316998	-1.12401	-4.30598	-0.560135	-1.97881	-2.07681	0.405298	2.71832	0.221945	0.412867	0.238028	-0.571503	1.42334	1.31901	-2.89652	3.48748	1.89243	-1.67533	0.182387	-0.661631	1.86329	0.307466	0.355557	0.0599192	-2.73817	0.483306	-3.17455	-2.68594	0.480465	3.192	-1.73813	1.07531	2.23912	1.31796	-0.321388	1.69871	3.7288	-0.819525	-2.10435	0.142767
b0487	cueR CueR transcriptional dual regulator	-0.9313	0.688989	-0.415264	2.08981	1.36755	0.302828	-1.87146	0.00773306	-1.30111	-0.072712	1.26257	5.08829	0.792339	2.5697	2.77018	-0.523915	1.63079	1.58398	0.190012	-0.115471	-0.741075	-1.54867	0.873971	2.42385	1.80091	-0.355521	-0.0578062	0.107424	-0.568084	-0.296957	-2.6938	-2.27211	1.00818	1.15953	-0.500733	0.806889	1.00134	1.02359	1.36237	0.867232	3.21057	0.219009	-1.06869	-1.4488
b0488	ybbJ conserved protein	-0.0390435	0.55558	-1.73015	0.489353	0.0579925	-2.11404	-2.69441	-1.50989	-2.40189	-0.471431	-0.780357	-0.684049	0.37655	-0.446643	-0.0574784	-1.26245	1.31446	1.50721	-0.455298	-2.54166	0.351345	-2.51269	0.655717	-1.47863	0.234976	-2.66788	-1.77875	-0.42328	-0.822273	0.61096	-1.57754	-1.06393	-2.2819	-1.0122	-1.22115	-0.926792	-2.8049	0.251032	0.429221	0.423798	-2.20746	-1.25448	-2.34344	-0.693343
b0489	qmcA putative protease	0.380201	0.316985	-2.41465	-0.552654	2.11553	-1.48224	-7.10901	-2.03331	-2.40382	-4.2101	-0.635563	2.9823	0.119527	0.552797	0.770466	-2.93223	-3.64938	-2.59846	-3.70911	-7.2526	1.54857	-4.8397	0.230542	-2.10867	-1.0645	-3.26964	-1.87147	-0.513096	-1.9032	1.13676	-8.45922	-8.7495	-2.51215	0.349326	0.925109	-2.53688	-3.00306	-3.95214	2.72911	-1.86712	-5.98429	-1.25301	-3.90787	-1.75971
b0490	ybbL predicted transporter subunit: ATP-binding component of ABC superfamily	2.27704	0.251672	-3.04797	-6.5124	-3.87625	-5.26689	-2.83901	-4.90762	-5.74202	-9.43591	-2.6696	2.0292	-1.85695	-3.82233	-4.2646	-0.0783743	1.53954	0.743766	-4.98746	-6.40027	-2.15527	-0.679705	-2.98098	-2.76173	-4.82303	-4.10371	-5.45183	-2.18596	-2.53245	-6.48448	-14.3019	-14.0963	-5.47349	-2.84117	-2.41128	-3.37542	1.48589	-5.41183	-3.76991	-4.41094	-1.50921	-1.77985	-6.4697	-2.06078
b0491	ybbM putative metal resistance protein	1.64433	0.368945	0.699379	-2.65369	-1.20316	-0.364235	1.85312	-2.44341	-4.3294	-4.52687	-0.238613	0.754334	1.00838	0.372747	-1.33769e-05	0.583223	0.830675	0.276273	2.08082	-0.849171	2.52443	-0.808822	-0.281698	0.930716	-0.811334	0.563643	0.706135	-0.862239	1.26424	1.29188	-9.36119	-8.94268	-0.706542	-2.16729	-2.08325	-1.18841	-1.07591	0.233589	-0.42272	0.00545635	0.641656	0.895579	-0.444217	1.24657
b0492	ybbN chaperone and weak protein oxidoreductase	-0.784176	0.679854	0.16192	-1.20914	-0.0907122	0.172123	-0.531321	0.736463	-1.61848	-0.386371	1.30366	3.4556	0.734252	0.994833	1.1935	-0.904772	-1.67554	-0.551823	0.704238	-2.74063	-0.434846	0.638831	1.22971	1.42444	2.27147	-1.06763	-0.508821	0.535731	-0.698423	0.351124	-0.934132	-1.05402	0.461515	0.928587	0.195676	-0.282559	-1.25326	1.19891	0.13739	2.72929	-0.0331566	0.496037	-0.682408	-0.477991
b0494	tesA TAP complex	-0.324802	0.561308	-0.763773	-1.86486	-0.978448	0.519678	1.55489	-1.1506	-2.2867	-2.20543	-0.352235	-2.38207	0.0672636	0.0855249	0.256643	0.185775	2.52011	1.99998	0.886897	-0.222389	1.1042	-1.45178	1.72661	0.0351289	0.802273	-3.15068	-2.91861	-1.06935	-2.56037	-0.00967796	-5.10684	-4.993	-1.02738	-3.96917	-2.02044	-1.01028	-4.72599	-1.18652	-2.40405	-2.58854	-4.67268	1.47529	-1.96969	1.7187
b0495	ybbA YbbA/YbbP ABC transporter	0.199312	0.331389	-4.18175	-4.72766	-3.0608	-0.780531	-1.15678	-1.76093	-6.29945	-1.81769	-0.545761	-4.32764	-1.20417	-0.244986	0.0768112	-2.36683	-1.25122	-0.335955	-1.47506	-4.03037	-7.85021	-6.84085	-0.67976	-4.02307	-1.95266	-1.06681	-1.68214	-3.5279	-4.46817	-0.232079	-9.09458	-10.374	-5.00935	-7.21944	-0.120887	-4.40212	-11.314	-4.40706	-2.82322	-2.41097	-9.5984	-1.35131	-3.5727	3.4133
b0497	rhsD RhsD protein in rhs element	2.59538	0.333108	-3.93997	-6.21448	-2.504	-6.00373	-3.7956	-4.76007	1.86719	-6.56258	-2.02699	-4.73159	-1.95327	-5.25444	-6.61258	-0.695033	-3.75279	-6.16381	-4.43487	-3.87671	0.703046	-4.9637	-4.84138	-5.92006	-4.56386	-4.52531	-4.18575	1.52421	-3.27954	-3.51917	-5.62238	-5.28705	0.829232	-6.00403	-1.7026	-4.53072	-5.79322	-4.1696	-5.06018	-4.75197	-2.81473	-1.74292	-2.26991	1.5509
b0499	ylbH conserved protein, rhs-like	2.0283	0.729598	-0.697338	-0.659924	-1.29182	-0.612954	-2.16067	0.250145	-3.14125	-4.01327	-0.425788	0.708145	-0.33253	-0.20149	0.0672361	0.0911101	0.546925	1.00875	0.645998	1.11048	-0.710882	0.424605	-0.516166	0.86295	-0.0781914	0.349298	0.85485	0.323925	1.42084	0.132389	0.774761	1.27415	0.419298	-0.0343845	-0.872853	0.877639	1.13658	0.196646	1.16153	-0.624492	2.45059	0.562885	1.14282	-0.00237778
b0501	b0501	0.711033	0.560202	-1.70257	LQ	-1.32726	-1.18622	-1.66451	LQ	-0.743079	-0.894459	-0.225833	-0.304502	-0.626422	-0.554296	-0.766932	-1.24082	0.190655	-0.633654	0.178523	0.515944	-1.71332	-0.224671	-0.772831	-0.900462	-0.681212	-0.759866	-0.796504	-0.618116	-0.18095	-0.336902	-0.683208	-0.938509	-1.78981	-0.788187	-1.00443	-0.613613	-0.721816	0.0756298	-1.18958	-0.818915	-1.73206	-1.67901	-0.498566	-0.645361
b0502	ylbG predicted DNA-binding transcriptional regulator	0.00182576	0.575276	0.189323	-0.506727	-1.76143	0.0919075	-0.405029	LQ	-0.963211	-1.49714	0.202528	-0.565345	0.97765	-0.606129	-0.113027	-0.979892	0.322624	0.676584	-0.731318	4.38482	-1.49238	-0.341554	0.465888	1.8205	0.243087	-0.889228	-0.278859	-0.0701574	-0.28554	0.24176	-2.06339	-0.959406	-0.856738	2.28067	-1.85295	1.46754	4.32618	-0.161927	0.423133	-1.28695	-2.38436	-0.438291	0.212114	-0.20802
b0503	ybbB tRNA 2-selenouridine synthase	-0.794784	0.326888	4.65257	3.40203	0.439932	0.624948	-5.1546	3.48181	-3.30771	-2.56859	2.52498	3.45416	0.916252	1.84135	2.16146	-1.14531	4.1065	4.11634	3.41054	-0.278896	-1.71993	-3.26032	3.46332	-2.06743	4.19612	1.18236	2.5001	2.08539	4.28557	1.77613	-4.16969	-3.81892	2.89203	4.53872	2.20768	0.289116	-5.24691	2.17977	3.07965	1.60415	-2.34096	0.518255	-1.73183	1.75375
b0504	allS AllS transcriptional activator	0.400077	0.857986	-1.04047	-1.80509	-1.04584	-2.12031	-1.6676	-1.33547	-2.5928	-1.63692	-0.662567	-2.16598	-1.58508	-0.0736401	-0.36662	-2.1794	-0.614434	-0.577586	-2.1168	-3.69139	-2.17712	-3.81602	-1.15647	-0.637777	-1.25799	-1.57311	-1.52538	-1.19583	-1.17112	-1.89317	0.46662	0.77825	-2.0395	0.136781	-0.0041265	-1.06649	-3.49195	-1.38924	-2.00489	-1.24312	-0.849034	-0.946147	-2.56432	0.322736
b0505	allA ureidoglycolate hydrolase	-0.637519	0.335783	2.32918	0.503087	0.206916	1.08053	-3.94465	0.771924	-0.46148	0.09381	1.50648	0.509212	-2.34824	0.839538	0.583365	-2.1648	4.22295	3.85671	-0.787766	-3.63608	-2.92336	-2.24781	-1.11552	1.52801	0.804956	1.71528	1.7136	-2.1856	1.39091	-0.0793277	-3.73523	-2.64716	-2.59188	-1.68938	4.83619	-1.90443	2.78611	0.718959	-4.17681	-1.67735	4.96359	-3.30406	-2.05101	-0.900119
b0506	allR AllR transcriptional repressor	-0.773428	0.743336	0.838643	2.41844	-0.219964	0.541865	-2.06503	2.80742	-1.24249	-0.468896	1.42447	-1.03016	0.757062	0.582124	0.687915	-0.932253	-0.475827	-0.150431	1.53212	-3.26282	2.338	2.53145	0.469213	-0.979551	1.32907	0.263766	0.347536	-0.522892	0.186113	-0.264749	-2.47181	LQ	-0.674339	1.01824	-0.571717	-0.525521	-2.6204	0.37933	-3.06039	2.09667	-2.7815	0.430404	-2.16617	1.25645
b0507	gcl glyoxylate carboligase	-0.0782853	0.498421	-0.357432	-0.563582	-0.164429	1.18669	-2.22463	-1.49517	-3.66076	-2.46056	0.889236	0.564328	0.755324	2.10898	1.85112	1.12782	-0.943364	-0.548033	-0.0355011	-1.99371	0.644583	-1.17325	1.67407	1.71246	0.498266	0.150581	0.237147	0.825658	-0.0407123	0.766924	1.2803	0.941026	-1.20118	0.0404815	-0.139643	0.897587	0.117223	-0.302185	1.24076	0.329969	-3.92702	1.85617	-3.02533	3.5133
b0508	hyi hydroxypyruvate isomerase	1.99088	0.48291	0.522129	-2.0825	-1.52536	-0.229778	0.318525	-1.6285	-3.40685	-6.35968	0.440682	-2.6337	1.7806	-0.699243	-0.611473	0.615317	-3.20265	-2.57334	-0.886313	-0.0633057	1.15713	0.905858	-0.0903062	0.473649	-1.44836	-1.18483	-0.460512	-0.724882	-2.20051	0.246139	-2.6158	-2.03276	-1.17818	0.207527	-1.32798	-0.214474	1.58543	-0.471589	0.718977	-2.13454	-1.98233	2.47585	-1.83358	2.08523
b0509	glxR tartronate semialdehyde reductase 2	1.28065	0.375265	2.37075	0.287035	-0.667398	1.34476	0.000895128	-0.825819	-4.89699	-7.89509	1.77969	-0.593194	1.82913	2.09397	1.87716	0.854189	1.10741	1.44359	1.69698	3.7434	-0.184533	1.81673	1.51277	1.22777	-0.52029	0.55587	1.42501	-0.121591	1.45106	2.60295	1.23722	1.09485	-1.15897	-0.291282	0.270225	2.4107	3.43379	1.64785	2.00777	1.99761	-3.94228	2.10616	-1.86231	2.44927
b0510	ybbV predicted protein	1.25671	0.46432	-2.21943	LQ	-0.282373	LQ	-2.31776	LQ	-1.41911	-2.45594	0.362132	-0.517955	-0.87295	-1.39272	-1.66265	-0.292106	-0.446281	LQ	-1.619	-3.14251	-2.67517	-0.852585	-1.31531	0.343726	-1.61602	-0.535019	-0.909917	-0.316996	-0.970235	-1.32785	-2.45564	-2.67123	0.580606	-1.24248	-1.53141	-1.40184	-0.530873	-0.737226	-1.94482	-0.473641	-0.869894	-0.50619	-0.0885607	-1.93582
b0511	ybbW YbbW NCS1 Transporter	2.99146	0.484789	0.068413	-2.22722	-1.68981	-1.89282	0.366846	-0.859807	-2.90044	-4.3863	-0.140301	-1.52375	-0.662967	-1.38295	-1.18959	-0.241697	-0.706687	-0.556765	-0.987376	-0.907491	-0.101332	-0.27122	-0.554415	-1.1584	-0.874854	-1.20087	-0.840987	-0.355162	-0.435265	-1.44019	-1.54486	-0.795775	-0.0816143	-2.02077	-0.90121	-0.374236	-0.521473	-0.354146	-1.49464	-0.907455	0.42243	1.13077	-1.01197	-0.742223
b0512	allB allantoinase	1.02554	0.930741	-2.26448	-1.9505	-1.45546	-0.436598	-1.05776	-1.4855	-1.90287	-2.30596	-0.545242	-1.99504	-0.500117	-1.22648	-0.976712	-0.733076	-1.27794	-1.00368	-0.668132	-0.48018	0.561149	-0.989553	-0.207628	0.257206	-0.801356	-1.15476	-0.91874	-0.476024	-1.21942	-1.20804	-1.90647	-1.48436	-1.06939	-0.188008	-0.200942	-0.92391	-2.10059	-0.742585	-1.56932	0.280032	-1.68863	-1.3092	0.170511	0.562217
b0513	ybbY predicted uracil/xanthine transporter	1.87857	0.22417	-1.48752	-0.871191	-4.85193	-3.5147	-2.60366	-6.2454	-7.38952	-10.6801	-2.1211	-3.94464	-0.775391	0.763777	0.985344	-0.980552	-3.44239	-3.72571	-4.53514	-1.96786	3.37311	-2.45535	0.578555	-3.32354	-0.748771	-0.641896	-0.318186	3.135	-1.02642	4.71951	1.74899	2.89784	-6.14388	-2.66223	-2.75019	-0.038152	-0.787551	-3.18923	-0.0267018	-0.63123	8.08788	-1.71378	-8.6602	8.02704
b0514	glxK glycerate kinase II	0.269254	0.402704	0.322585	1.6643	-0.0473052	1.99389	3.49747	1.65035	-3.72153	-3.89886	1.97118	1.17901	1.16827	2.02978	2.83493	1.16271	3.02005	3.52793	1.82746	-2.9634	0.902071	-1.37745	2.21647	1.93921	2.13896	0.559751	1.4547	0.968005	2.16322	2.06275	-3.51465	-1.72454	-0.0264793	3.00281	0.277078	1.76001	0.619485	1.60992	-3.7022	-0.434205	3.74855	2.98202	-2.12291	1.66642
b0515	ylbA conserved protein	3.27615	0.301505	-2.81556	-1.35865	-3.47686	-1.57057	-1.54015	0.506052	-7.7522	-8.64365	-1.67347	-2.94443	-0.909516	-1.71229	-1.66565	-0.109055	-1.25382	-0.996975	-0.869984	-0.131219	0.299446	-1.40027	-0.578283	-0.680819	-2.46747	-0.389215	-0.511989	-0.582386	0.340161	-0.445366	1.53302	1.86904	-0.590563	-2.73954	-3.1603	-0.727517	1.09858	-0.522851	0.329731	-1.26102	0.776289	1.00423	0.225675	0.0257847
b0516	allC allantoate amidohydrolase subunit	1.98387	0.489964	0.758626	0.14912	-0.320293	-0.571187	-2.61721	-1.04616	-5.01397	-2.79788	0.634894	0.524341	-0.36084	0.0250809	0.701533	0.510115	0.752901	1.52622	0.351799	0.874703	2.0943	0.185439	0.32909	-0.283778	-0.0201582	0.434955	1.00148	0.00696424	-0.396049	-1.22173	-0.225566	0.874272	0.977889	0.156594	0.753905	0.00233622	-1.40372	-0.367652	0.438775	0.053648	-0.41592	1.61855	0.216278	0.762311
b0518	fdrA involved in protein transport; multicopy suppressor of dominant negative ftsH mutants	0.379456	0.284303	1.40391	1.33689	-0.490683	-3.82378	-2.82441	2.15639	-8.16554	0.0194103	1.92502	0.323812	1.19845	2.42	2.94744	-1.08861	3.17666	3.22068	-1.48344	2.33586	-2.02792	0.00529418	0.263141	1.88925	2.1235	-0.796596	0.268149	1.15095	-1.53625	0.124909	2.16456	3.05907	1.44972	2.32519	3.79939	-0.222477	6.69895	-2.28199	-2.30975	-0.356818	2.0521	-1.56679	3.03496	1.66445
b0519	ylbE	-0.669684	0.261537	-1.30066	-1.98199	-0.703866	-0.465694	-5.49145	-1.20801	-6.26054	-0.700672	3.02658	1.58985	2.33368	2.87392	2.8001	-6.22071	-0.447993	0.825434	3.74004	-2.61006	-8.13448	-4.02081	3.06228	-0.426506	4.93621	-1.28491	-0.937949	-0.158335	-2.41033	2.45286	-7.04179	-4.56589	-0.226737	-2.63753	1.61799	3.23477	0.481849	-0.405804	-4.85806	4.13265	4.87662	-0.457843	3.91292	2.24344
b0520	ylbF conserved protein	-0.347407	0.610259	0.7953	-2.1289	-0.485334	-0.274357	-0.215869	0.0889113	-1.00523	-0.865386	1.58687	-1.16284	-0.233741	0.575783	0.557762	0.458593	-3.17599	-2.71842	-0.294976	-0.817006	-1.24976	-1.34757	-0.185689	-3.43979	-0.140999	0.332588	0.129984	-1.03585	-2.91588	0.643938	-1.04104	-0.355549	-1.10498	-0.0381128	1.23124	-0.433847	-2.03055	-0.895712	-2.92421	-0.975184	-3.93894	-1.37207	-1.99791	0.156308
b0522	purK N5-carboxyaminoimidazole ribonucleotide synthase monomer	-0.0285503	0.660717	-3.52659	-3.1065	-3.10459	-3.10381	-3.53089	-4.23711	-3.92798	-1.62859	-3.57556	-3.48039	-3.52462	-1.76773	-1.58415	-3.97216	-4.47454	-4.10823	-2.69476	-4.8961	-4.25388	-4.89642	-2.92041	-4.93146	-3.19442	-4.12691	-3.89587	-2.18314	-2.99853	-1.93149	-3.0457	-2.99668	-4.093	-4.6274	-5.06903	-4.66017	-4.35311	-1.56314	-4.59183	-3.68558	-0.691003	-3.85727	-0.316725	-2.77455
b0523	purE N5-carboxyaminoimidazole ribonucleotide mutase	-1.12968	0.572604	-1.3746	-2.05714	-2.52136	-2.8915	-2.05798	-2.17907	-2.07138	-1.90359	-1.33197	-1.21337	-0.436025	-1.75409	-2.07692	-2.19307	-2.45174	-3.01395	1.40274	-2.82462	-2.28683	-2.03899	-1.73975	-3.40625	-1.22295	-2.99655	-2.71493	-0.506376	-0.544994	-0.659266	-3.31296	-3.52304	-1.28745	-2.25327	-3.18	-2.93253	-2.5952	-0.785248	-2.95598	-1.84648	-2.83206	-2.40152	-1.78302	-1.54398
b0524	lpxH UDP-2,3-diacylglucosamine hydrolase	-2.19793	0.877429	-0.194992	0.634965	-0.268691	0.513387	-0.311929	1.00865	0.0842701	0.537621	0.174973	0.713937	-0.284163	-0.0148865	0.734197	-0.476871	-0.488516	0.380883	0.489164	-0.0407881	-0.696121	-0.220391	0.631438	-0.237811	1.36454	-0.0391752	0.314748	0.814765	1.94197	0.781762	-0.786367	-0.199922	0.516906	-0.00867694	-0.991604	-0.230054	-0.531466	0.978589	-0.000611459	0.328293	-0.176344	-0.388681	0.265041	0.308979
b0527	ybcI conserved inner membrane protein	-0.345703	0.362869	-3.33867	-1.99676	-0.909151	-1.12369	-4.02871	1.02025	-2.3942	-0.81309	-2.20265	-1.72007	-1.20501	-2.03445	-2.00692	-2.26456	4.15754	3.43062	-3.54969	-3.47997	4.27509	-2.54558	1.16348	-1.81977	3.73563	0.749688	0.125805	0.977449	-2.50032	3.99203	-5.41441	-5.04795	-1.95075	3.39536	0.37197	-1.66561	1.39206	-1.18783	4.31291	0.787725	8.53058	3.59521	-4.57532	-0.741105
b0528	ybcJ predicted RNA-binding protein	-0.889829	0.538048	-0.613018	0.488259	0.0158418	0.310888	-0.519823	0.826214	-0.243404	0.487479	0.0490071	1.31954	0.768711	0.609517	0.705817	0.914281	1.13619	1.39552	1.04994	-0.296493	-0.269321	-0.243515	1.06161	-0.625811	2.12759	-0.225167	0.393955	0.369941	1.28368	1.47066	-1.06729	-0.53853	-1.1569	0.0617368	-0.497074	0.267229	-0.614521	1.91229	-0.723876	1.62203	-0.0577527	-0.0913259	-0.140479	0.694586
b0529	folD methyleneTHF enzyme	-2.00754	0.331068	0.920629	3.90073	1.24182	2.71339	2.7378	4.77787	-0.706389	0.338971	2.25339	2.13024	3.65828	3.7684	5.11313	1.92263	3.6584	5.29469	1.74506	-0.55278	0.301567	1.58276	2.89384	0.320027	2.7546	2.11213	3.72899	3.91824	2.664	4.39567	1.68696	3.27112	0.694539	3.38072	2.31747	3.1955	3.3104	3.68388	0.392589	3.30683	1.09492	1.77835	2.38218	6.21487
b0530	sfmA predicted fimbrial-like adhesin protein	3.26952	0.646267	-2.14922	-1.76483	-1.23742	-3.00136	-0.603294	-1.30309	-6.81753	-4.98796	-0.502762	-1.73986	-0.80719	-1.03389	-1.04022	-0.339243	-1.29301	-0.917773	-1.34055	-0.752129	-1.60769	-0.2609	-1.68895	-1.10129	-0.939442	-0.733447	-0.523464	-0.203146	-0.436795	-1.07822	0.608765	0.734787	0.643959	-0.636265	0.103878	-1.16577	-0.895339	-1.6887	-0.882837	-1.22634	0.42838	-0.405004	0.132751	-0.0655663
b0532	sfmD putative outer membrane protein, export function	1.67744	0.387817	1.0262	2.29697	0.305497	1.15836	-1.41573	3.6295	-2.09507	-2.664	1.81148	5.71807	1.10657	3.81857	2.7622	1.22138	3.80164	2.44091	5.52236	0.310045	0.796315	5.3858	3.11177	5.00416	4.95159	3.89815	4.29085	0.641927	3.75697	3.50007	3.23515	3.50322	1.70987	5.72017	0.948228	4.24392	4.82	2.85161	4.66796	3.76841	6.83597	0.435473	3.45041	2.48087
b0533	sfmH predicted fimbrial-like adhesin protein	2.55408	0.540021	-1.06763	-2.73595	-2.12353	-2.06066	-3.7608	-1.89021	-1.53152	-3.91347	-0.118176	-0.881393	0.880111	-0.638063	-0.714069	-0.159579	-1.65147	-1.58313	-0.95915	-0.345327	-0.138276	-1.22498	-0.577719	-0.565384	-0.502284	-1.15414	-1.16518	-0.756492	-1.38814	-1.38928	-0.844924	-0.905018	-1.2666	-1.90252	-1.08951	-1.09573	-1.56713	-1.91457	-2.49417	-1.12092	-1.75206	0.8394	-0.177437	1.52591
b0535	fimZ FimZ transcriptional regulator	1.74999	0.407039	-2.22001	-3.32936	-2.31402	LQ	-6.47941	LQ	-0.308372	-4.34492	-0.939763	-3.94946	-0.909788	-2.44663	-2.77422	-0.947488	0.79549	-0.511392	-0.784785	-1.8059	1.1275	-0.693869	-0.814576	LQ	-1.53265	-0.134185	-1.18393	-1.28739	-1.81408	-1.36746	-4.894	LQ	-1.41328	-1.53129	-2.11	-1.34064	-1.25881	-1.65635	-4.05944	-1.94297	-2.41198	0.486492	-0.0732246	1.23568
b0537	intD DLP12 prophage; predicted integrase	0.820654	0.642177	0.682719	0.833987	0.874005	-1.46128	-4.34735	-0.202193	-3.20725	-2.81296	0.51485	0.683823	-0.226852	-0.269144	-0.658628	-0.0804125	-0.1363	-0.169077	0.390759	-3.08184	-0.544858	-1.42633	-0.484996	0.828443	1.61333	0.992482	0.837334	0.276839	0.902337	-1.12018	0.512365	1.09008	2.97264	3.16651	2.18324	0.0308791	-2.33576	-0.146938	-2.2549	1.11653	1.75445	-2.25716	0.339986	-0.25366
b0538	b0538 DLP12 prophage; putative sensory transduction regulator	0.74209	0.47673	0.738731	LQ	-2.00656	LQ	-2.37615	LQ	-2.67997	-2.73478	-0.0505598	-3.58456	1.63602	-1.37191	-1.2759	0.542369	-0.498138	0.207199	3.03858	-5.18981	-1.80291	-0.0350799	1.52249	-0.588254	-2.47377	-0.164364	-0.182591	-0.378746	-2.38038	1.46078	-0.998875	LQ	-1.16176	-1.79349	-1.67633	1.23256	-4.82836	-0.850756	-2.776	-1.98619	-5.20786	-0.269446	-3.07118	0.809576
b0539	ybcC DLP12 prophage; predicted exonuclease	0.767954	0.488256	-0.256187	LQ	-1.6482	LQ	-2.65382	LQ	-1.41628	-1.35163	-0.268892	-1.56283	0.416887	-1.22568	LQ	0.385004	-2.48036	LQ	1.30954	-4.23915	-2.0462	0.179427	1.01646	-0.574897	-1.67104	-0.49727	-0.361344	-0.989897	-1.30198	1.86651	-3.56949	-3.11035	-1.7424	-2.59853	-1.74858	-0.218702	-3.92926	-0.102558	-2.12343	-1.1666	-4.06936	-1.08251	-3.22933	-0.52828
b0540	insE-3 IS3 element protein InsE	0.936849	0.440497	-1.19522	-2.21158	-1.73353	-1.97601	-1.1674	-1.36662	-2.73825	-2.9726	-1.00564	0.837468	-0.866345	-0.56213	-1.47897	-1.45791	1.3846	0.457594	1.98785	2.07961	-1.07302	0.546066	-1.25111	0.667809	-0.7706	0.248579	-0.50369	-1.14647	-0.433517	-1.11647	-4.84495	-3.97878	0.856184	-0.0399131	-1.28386	0.037602	1.23256	0.402912	0.91168	0.723599	-4.02665	-2.33211	-1.32718	0.207433
b0541	insF-3 IS3 element protein InsF	0.561359	0.365263	0.303182	0.131411	-1.58521	-0.108421	-0.969364	0.483715	-4.81317	-4.25091	0.470632	0.128174	0.934857	0.451236	0.90708	0.889227	1.73286	2.07693	1.10309	2.56489	-0.661534	-0.11887	0.479546	-0.706752	0.607038	0.704924	1.23579	-0.444257	0.131327	0.212183	-0.366292	0.273988	-0.843464	0.51797	-0.394584	-0.0916881	0.225523	0.0772395	-0.925037	0.248419	-0.14728	2.58728	-0.496181	1.36609
b0542	renD DLP12 prophage; predicted protein	1.27336	0.526829	-1.67486	LQ	-2.11348	LQ	-2.45568	LQ	-1.97212	-2.1311	0.890217	-1.14437	0.431271	-2.37812	-1.7839	-0.900769	-2.30376	-1.88647	-0.513544	-1.60827	-1.0808	-1.8236	-1.02973	LQ	-0.714396	-1.54638	LQ	-1.37073	-0.302516	-0.693083	-2.01251	LQ	-1.77649	-1.78448	-2.05417	LQ	-1.7348	-0.653406	LQ	-1.23569	-1.53824	-1.04848	LQ	-0.355133
b0544	ybcK DLP12 prophage; predicted recombinase	1.45314	0.758456	-1.33145	-1.80719	-1.55468	-2.1534	-1.85578	-1.11237	-1.04761	-2.23658	-1.1236	-1.13445	-1.89509	-0.808089	-0.320596	-0.929126	-0.797287	-1.1641	-0.976684	-0.298675	-1.12178	0.435347	-2.08063	-1.2494	-1.4394	0.173573	0.154063	-0.222167	0.0624939	-1.24752	1.07094	0.857648	0.697714	-0.114427	0.325966	-0.665157	0.536548	-1.28773	0.0448771	-1.34228	0.973369	-2.58336	1.25162	-0.673401
b0545	ybcL DLP12 prophage; predicted kinase inhibitor	2.38166	0.378579	1.40979	-0.874488	-2.26872	LQ	-1.68548	-0.449925	-6.27368	-7.85932	-0.373092	0.0233955	-1.99169	0.190884	-0.961171	-0.380246	1.02623	-0.0395968	0.886189	-1.42893	2.23601	1.81579	-1.46667	-1.15226	0.509999	0.836967	-0.186311	-0.689381	1.96695	1.25756	-3.04079	-3.16888	1.37187	0.337046	0.00819809	-0.280905	0.256864	1.32184	0.786071	1.16894	1.67277	0.26653	1.87899	-0.311612
b0546	ybcM DLP12 prophage; predicted DNA-binding transcriptional regulator	2.38678	0.779594	-2.7187	LQ	-1.40104	-1.8793	-1.22902	LQ	-0.0573152	-2.71583	-0.517234	-2.31949	-0.433954	-0.720757	-1.27051	-0.927389	0.0616126	-0.507123	-2.30727	-1.85307	-1.66358	-0.700318	-1.38851	0.0458895	-1.77483	-0.769836	-1.24622	0.68107	-1.03992	-1.62024	1.03348	0.164561	-0.174629	-1.00888	-0.0678664	-0.306093	0.606316	-1.51279	0.165916	-1.84979	1.54424	-1.2506	0.900806	0.053215
b0547	ybcN DLP12 prophage; predicted protein	1.79089	0.256729	-4.91438	-6.21207	-4.70664	-2.89147	-8.19133	0.560928	-4.90548	-7.00022	-0.839989	-7.50616	-2.85966	-1.26774	-3.10824	-1.15332	-3.79291	-3.61406	0.0581362	-10.6151	-5.26431	-3.19896	-2.62303	-2.582	-1.32787	-4.3385	-4.33394	-0.449766	-3.16401	-6.55966	-2.33169	-4.14965	0.0390778	-2.40275	-4.15658	-1.08096	0.569587	-4.17094	-1.51012	-3.69673	-9.86497	-2.76047	-2.99737	-4.58682
b0548	ninE DLP12 prophage, conserved protein similar to phage 82 and lambda proteins	2.01542	0.827237	-1.96457	LQ	-2.63963	LQ	-1.1369	LQ	-1.87682	-1.65214	-2.36189	-1.60837	-2.08786	-2.15718	LQ	-1.32597	-2.66981	LQ	-0.1579	-3.07323	-1.5392	-2.0415	-1.92737	-1.92056	-1.98498	-1.7194	-1.84913	-2.52804	-1.45137	-1.66722	-3.34472	LQ	-2.44293	-2.57703	-2.99665	-2.11534	LQ	0.479485	-2.46398	-2.07849	LQ	-1.35087	-2.47478	-0.162019
b0549	ybcO DLP12 prophage; predicted protein	0.285748	0.295778	-1.02826	-1.79219	LQ	0.0605605	-2.29571	0.512183	LQ	-1.29188	0.575086	2.07312	-2.35089	-0.178528	0.553867	1.61799	2.34571	2.185	2.72883	5.43287	-2.94353	-2.96817	-1.31421	-1.60183	4.45084	-1.71745	-0.656702	LQ	-0.717145	3.4533	-5.02099	-2.75312	LQ	-2.23338	LQ	0.587394	-2.93236	2.02101	0.944931	0.684325	-3.90195	-0.955558	-2.98586	-2.24443
b0550	rusA endodeoxyribonuclease RUS (Holliday junction resolvase)	1.0572	0.521396	-0.105959	-2.92058	-2.09471	-1.74292	-0.21613	-2.01389	-3.32794	-1.79269	-0.515218	-1.15353	-2.01503	0.180073	0.205342	-0.331558	0.0274761	-0.0880372	-1.62357	-1.05156	-0.299781	-0.842867	-0.538938	-0.452312	-1.13721	-0.881607	-0.694613	-1.05734	-0.517476	0.209651	-0.220198	0.113941	-1.15529	-1.86814	-2.11492	-0.644448	-0.656125	-0.946824	-0.876436	-1.15784	-0.208832	-2.04909	-2.84387	0.252826
b0551	ybcQ Antitermination protein Q-like protein	2.44878	0.532838	-1.73931	-2.09194	-2.37545	-2.63995	-1.07728	-1.61236	-3.15087	-3.68666	-2.17413	-3.17343	-0.881811	-2.26804	-2.38535	-1.44035	-1.48016	-1.73985	-0.761494	-1.00941	-1.30993	-0.57389	-0.915897	-1.42463	-0.856201	-1.26428	-0.876731	-1.02407	-1.61227	-1.34233	0.597537	0.287859	-1.52471	-1.64732	-2.56926	-1.37758	-0.194743	-1.37059	-1.24653	-2.15632	-1.34442	-1.66057	-1.1254	-0.886166
b0552	insH-2 IS5 transposase and trans-activator	0.43197	0.284299	-0.0854048	-1.13665	-1.9019	-0.747509	0.975696	-2.32928	-4.72446	-3.85157	-1.52178	0.386374	-0.798454	3.19209	2.50035	0.426903	3.31836	2.65563	1.55953	0.639059	2.56494	0.159263	0.989607	0.62535	-2.04488	1.43127	1.90587	-1.25004	2.27492	-0.0299484	0.637625	-0.0777556	-1.55796	-0.672703	-1.48155	-0.222351	0.395425	0.0708256	1.68534	-0.422266	1.57754	0.182824	-0.195467	1.84186
b0553	nmpC outer membrane porin protein; locus of qsr prophage	2.06033	0.379736	-0.458654	-0.352267	-0.99395	-1.3858	-1.75203	LQ	-1.97603	-3.329	-0.14107	1.48558	-0.912445	-1.15934	-1.44462	0.850641	-2.15253	-0.0323547	-0.673693	-0.47967	1.30581	0.979152	-0.724868	-1.03643	1.16844	0.914403	0.291814	0.31255	-1.5487	-1.47674	3.36093	2.76006	1.29236	1.34094	0.382301	-0.449524	1.31338	0.0592311	1.65693	-0.288634	0.767141	-0.952928	2.23783	0.299166
b0554	essD DLP12 prophage; predicted phage lysis protein	2.43137	0.537711	-2.19213	-2.53438	-2.36887	-2.54637	-0.981679	-2.42233	-1.35874	-2.69765	-2.11318	-2.14878	-0.832291	-2.93555	-2.84714	-2.26244	-3.15468	-3.49501	-2.14399	-3.39866	-1.89413	-3.32716	-1.80444	-3.69157	-1.58484	-2.70383	-2.82576	-3.13003	-2.17065	-1.7391	-3.2106	-3.37488	-2.63812	-3.32146	-3.05908	-3.02714	-2.12513	-1.22454	-2.3937	-2.508	-1.51078	-0.0378069	-2.63168	-1.05167
b0555	ybcS DLP12 prophage; lysozyme	2.4071	0.253667	0.351877	0.596667	-2.67765	0.707472	-0.809827	-1.75862	-6.45669	-4.88028	-0.62373	-0.0184417	0.112905	0.753324	-0.207405	1.70756	2.37437	1.25697	-1.5947	-0.793278	-1.99805	0.0187188	0.299964	-1.07748	-0.126742	-0.417241	-0.531336	0.0543904	4.98367	1.28099	-0.699871	-1.41932	-0.0488334	-0.22959	-1.88152	0.769407	2.21358	0.598342	-1.95784	-0.0329953	1.63061	4.75657	-4.07466	-0.2067
b0556	rzpD DLP12 prophage; predicted murein endopeptidase	1.8691	0.310681	-1.32022	-1.87888	-2.16301	-3.62071	-3.55216	-1.65631	-6.73741	-7.42464	-1.29263	-1.46267	-1.0558	-0.590101	-1.06429	0.355027	-5.29374	-4.22195	-1.43448	-1.32738	0.957628	-1.99875	-2.49315	-1.10645	-1.15334	-0.427016	-0.533178	-2.1593	-1.7223	-0.645449	-3.67012	-4.00315	0.630301	-4.26112	-0.94955	-2.49629	1.65407	0.141024	-2.62336	-3.5393	-7.11497	-1.11544	-3.99888	1.29301
b0557	borD bacteriophage lambda Bor protein homolog	2.39205	0.322767	-0.559127	LQ	-4.55333	LQ	-4.26794	LQ	-5.06487	-7.50446	-0.347875	-0.704524	-1.14353	-2.24826	-2.74458	-1.29946	-2.04037	-2.46286	-1.93824	-3.83999	-0.920541	-0.869582	-2.28733	-2.8637	0.371648	-0.993361	-1.51297	-3.06692	1.46582	-1.36078	-1.18277	-2.45659	-2.24685	-2.8307	-4.23791	-2.44916	-3.04615	0.756457	-3.46844	-0.315815	2.24031	-1.40246	-3.31092	-2.05074
b0558	ybcV DLP12 prophage; predicted protein	1.41616	0.854375	-1.83828	LQ	-1.0073	LQ	-1.36377	LQ	-0.818739	-1.37848	-0.0944223	0.214491	1.11859	-0.00742092	LQ	-0.474744	1.26482	LQ	-0.594946	-0.0451768	-0.388305	-0.0903931	-0.0375343	LQ	-0.79458	0.145235	LQ	-0.181347	-0.598488	-0.712788	1.26219	LQ	-1.13201	-0.380052	-0.0641024	-0.145568	-0.0845814	0.281964	-1.12255	-0.577674	-0.615732	-1.65803	0.167776	0.495174
b0560	nohB DLP12 prophage; DNA packaging protein	-1.33571	0.547198	-0.397114	0.509298	-0.551901	1.18546	-0.994841	2.29227	-0.528372	-1.16936	1.59465	0.114838	1.91878	1.42322	1.68648	2.11142	-0.258824	0.892767	-0.00808453	2.97297	-0.0452764	1.20596	1.43889	0.135373	0.942648	-0.465789	0.650649	1.07993	3.86644	1.39468	-0.0645997	1.00042	-0.450465	-0.938981	0.10078	2.80976	0.126139	0.92834	2.03675	0.627198	-0.596896	0.633885	1.03686	0.197453
b0562	ybcY DLP12 prophage; predicted SAM-dependent methyltransferase	1.49289	0.344053	-1.06923	LQ	-0.595493	LQ	0.452538	LQ	-4.2814	-4.80343	0.842976	-2.94995	-0.754086	-0.219016	-0.263409	-0.343729	1.19846	0.872911	-0.408191	1.78854	-0.512869	1.88965	-2.12536	2.07151	0.275273	1.77488	1.61638	-0.46819	1.35061	-2.92259	3.99182	3.33962	1.72087	0.0279692	-0.100869	1.57945	3.76757	0.186396	1.78996	0.248009	6.22623	-3.73951	2.62658	0.0614348
b0563	tfaX DLP12 prophage; predicted protein	0.748359	0.412125	0.386819	-0.730543	-0.806414	-1.14778	0.315745	LQ	-1.84623	-1.48261	1.29601	0.154385	-0.036198	-2.67837	-1.22112	0.0383053	-0.103436	-0.876093	-0.709331	0.27613	2.32654	0.247313	0.226424	-0.567752	0.195654	1.01343	-0.235801	-0.10553	0.200219	0.10651	1.58116	0.505087	2.00389	0.598341	0.864049	-0.818971	-0.740689	1.79393	1.00521	0.951081	3.10985	-2.30839	0.647281	-0.101412
b0565	ompT outer membrane protease VII (outer membrane protein 3b)	3.22112	0.602873	-1.65177	-1.60709	-1.4332	-1.12122	-1.17284	0.264739	-0.054283	-2.23587	-1.9704	-3.95427	-2.08831	-2.62281	-2.87654	-0.559357	-0.836959	-0.489129	-2.33287	-0.345681	0.0381527	-1.49589	-2.1615	-0.595735	-1.34513	-0.711638	-0.686062	0.475301	-0.0769112	-2.59022	0.235578	0.52501	0.524911	-0.938386	-0.408714	0.186847	0.523826	-1.76106	-0.71818	-1.98679	0.04731	-1.11448	-0.0254397	0.209292
b0566	envY EnvY transcriptional activator	1.47493	0.291174	0.551957	0.375995	-3.44248	-4.14123	-9.69858	-1.63034	-9.42893	-3.65436	-1.40934	-2.61939	-2.10084	-1.90586	-2.52777	-2.05922	-1.97522	-3.23247	-0.70749	-10.8297	0.536144	0.236114	-1.62767	0.192192	1.68323	0.565638	-0.383621	0.00388303	2.37365	-0.416763	1.70554	0.621642	0.966675	1.1485	0.343997	-1.07609	-0.386314	-2.01091	-1.72142	0.0246646	5.94775	-5.87073	-0.681644	-0.0428447
b0568	nfrA bacteriophage N4 receptor, outer membrane protein	-0.344968	0.69808	-0.574855	-0.397983	-0.208117	-0.0354304	-1.25592	-0.864406	-1.71316	0.659856	0.640231	-0.564788	0.221933	-0.737627	-0.76651	-0.266271	-0.223151	0.192592	-1.0757	-1.70962	-0.186835	-3.83641	0.583381	-0.104058	-0.120767	-1.37	-1.14466	-0.543225	-0.562529	-0.540461	-1.67939	-0.979078	-1.10504	-0.0107927	-0.569117	0.153963	-1.12954	0.306175	-2.37578	0.0731665	-0.14063	-1.56212	-1.83107	-0.911579
b0569	nfrB bacteriophage N4 receptor, inner membrane subunit	0.455861	0.336554	-2.54458	-1.21997	0.320297	-3.56472	-1.58657	-0.398374	-6.51469	-3.57365	0.0930368	1.66749	-1.81259	-0.766394	-0.981707	-0.968397	1.62808	1.83764	-1.08194	-1.77457	-3.6458	-5.79793	-0.698218	-0.65609	0.0772525	-3.13657	-3.09726	-1.58804	-1.05418	-2.43265	-3.81603	-3.04315	-0.674144	-1.09199	0.534208	-1.36888	-3.58572	-0.630952	0.172485	0.498277	0.0888955	-2.34358	-3.35008	1.34534
b0570	cusS putative 2-component sensor protein	0.168335	0.368802	0.327693	-2.21058	-2.47545	LQ	-4.00374	LQ	-4.57364	-5.17321	-1.74062	-0.52487	-5.05925	-3.33857	LQ	-5.11182	-8.5561	LQ	-5.68257	-4.18487	-1.86365	-4.67223	-2.00934	-0.179866	-3.79773	-4.64494	LQ	-1.89585	-1.30967	0.690644	-5.93065	LQ	-1.79111	2.07554	1.29573	-2.64761	-9.51075	-3.70849	-4.01502	-2.17902	-3.48221	-2.62365	-0.607322	1.32315
b0571	cusR CusR transcriptional activator	-1.3938	0.784623	1.01248	LQ	1.71465	2.44737	0.198242	LQ	-1.29958	0.674925	2.52503	4.48715	0.53375	0.977434	1.63285	0.819739	-0.0934795	0.92808	0.469387	0.604179	-0.257088	2.51485	2.23816	0.00457676	1.75934	-0.0418894	0.445361	1.15252	3.19278	1.6503	2.15683	2.39924	1.54401	1.88212	-0.459982	2.45722	-0.235108	3.18485	-0.47608	0.248882	-0.898993	2.10834	1.68011	2.04479
b0572	cusC outer membrane factor of the CusCFBA copper efflux system	1.11371	0.540113	-0.252391	0.823953	0.605461	-0.294505	0.180953	-0.0748573	-1.3625	-2.63207	1.99549	-0.192131	1.8222	1.20012	0.862408	1.1739	0.288805	0.231662	0.815241	1.38183	-1.45442	0.395711	0.993332	0.511902	1.00046	0.350008	0.164175	0.700764	0.803738	-0.407721	-1.05241	-1.39787	0.785523	0.900823	2.7898	0.256498	2.88358	-0.156963	-0.217	1.62007	2.79869	1.68523	0.512537	-0.85294
b0573	cusF periplasmic copper-binding protein	2.80012	0.252746	-1.90674	-3.08225	-2.84507	-4.672	2.12987	LQ	-3.65961	-8.6529	-0.111522	-4.19215	-0.893662	-2.37739	-4.06442	-1.9573	1.86237	0.305976	-3.23754	-0.266719	-2.16049	-4.16086	-1.14317	-2.37977	-4.39059	-4.84381	-5.10568	-2.44171	-3.42774	-3.22239	-5.64443	-6.73655	-4.66916	-3.2485	-2.84997	-0.228548	-0.290481	-1.9174	-2.1904	-0.650181	-5.04415	0.750768	-6.15158	-0.0212325
b0574	cusB membrane fusion protein of the CusCFBA copper efflux system	-0.27289	0.574365	1.42939	0.534361	0.844365	0.880479	0.165457	0.120546	0.690097	0.49145	1.70914	1.24555	0.902367	1.09513	0.98428	0.844196	1.19772	1.28838	0.740806	-0.188318	-0.159669	0.222564	1.01236	1.18705	0.64714	0.303156	0.586162	1.01499	1.00805	1.13803	-0.00266967	0.262431	0.95186	0.382929	0.385246	0.53839	1.32717	1.48274	-0.0338603	1.19221	-0.793792	1.1364	0.0379436	1.90038
b0575	cusA YbdE	-1.00611	0.485539	0.486135	1.67918	0.424013	0.887922	-0.662835	-0.0153656	-2.38683	1.08711	1.74297	2.30385	0.0455109	1.86655	1.97856	0.403289	0.558229	1.07342	2.28404	0.545897	-0.209651	-0.879708	2.88925	1.21834	2.19107	1.07792	0.987056	0.782956	1.07808	2.19876	-2.0092	-0.968676	0.118985	3.23099	0.322787	0.64869	0.73746	2.26643	-1.73822	2.77418	-0.934218	1.18203	-0.98352	0.769741
b0576	pheP PheP phenylalanine APC transporter	-0.0887594	0.589565	0.408342	1.19952	1.27277	1.7984	-4.21025	1.41391	-1.58841	-1.23765	0.87779	1.39701	1.30832	2.66227	2.64351	1.45194	0.653763	1.00445	2.38833	-0.815593	1.43209	1.06843	1.60342	2.74307	0.827721	0.550134	0.79767	1.1592	-1.01696	1.95083	1.27215	1.87269	0.617788	2.76171	2.84799	0.928917	1.63835	-0.206015	2.70859	-0.385332	1.98474	0.829095	-1.91357	0.100671
b0577	ybdG predicted mechanosensitive channel	2.31947	0.240866	2.05993	2.13703	1.65183	-0.442694	-1.27194	3.51557	-3.86599	-5.3998	4.84562	4.86798	3.14354	2.29919	2.56824	2.15744	4.76538	4.4278	3.80538	-0.134504	6.61795	3.33941	2.61919	1.4174	3.71715	3.35371	3.23149	1.81665	3.81723	-0.352075	5.25954	4.54133	5.15584	4.56735	3.72444	2.32975	5.81228	-0.2244	3.36357	4.08827	4.64388	0.618823	4.52795	-0.149662
b0578	nfsB NfnB	0.820411	0.310452	-1.83809	-0.91389	-1.69155	1.5127	-4.01464	-1.42848	-3.6492	-0.423123	1.12682	-4.18719	-0.36702	-1.21548	-1.11646	-0.797582	0.0889807	1.66781	-3.43978	-5.03094	-1.77048	-0.81114	-0.166635	2.92103	-1.14659	-1.72226	-1.75678	2.24004	2.35241	-2.29115	-5.21893	-3.76282	-0.81414	2.40037	-2.31433	-0.527247	0.944856	-1.24727	1.25774	0.120469	1.82435	4.40969	-1.22477	3.98302
b0579	ybdF conserved protein	0.925226	0.356543	-3.0868	-3.15047	-2.82346	LQ	-6.0292	LQ	-2.48633	-3.97706	-2.78336	-3.92521	-2.13237	-4.77149	-3.79622	-2.27278	-1.73471	-1.93587	-0.484824	-5.06262	-3.17502	-1.68536	-1.04222	-1.39315	-2.14483	-0.780584	-1.24343	-0.878963	-0.198782	-2.55991	-6.54865	LQ	-3.01576	1.18381	-4.38496	-0.466232	-4.79523	-0.796138	-0.374704	-3.27907	-5.48273	1.65255	-3.4934	0.28103
b0580	ybdJ predicted inner membrane protein	-0.549805	0.442568	-0.979164	LQ	-0.923792	LQ	-0.569465	LQ	-0.124766	0.014899	0.671753	1.40672	0.0820868	-0.137589	0.202449	0.106944	1.24873	1.03339	1.8163	1.74286	-1.05256	1.21933	0.948004	-0.0226345	1.50682	0.592079	0.564672	-0.422357	1.29496	1.38582	-1.50424	-1.02271	-0.42463	2.15339	0.655663	0.288937	-0.623702	2.01769	2.83618	2.43532	-0.854642	0.581136	0.0555571	-0.280852
b0581	ybdK gamma;-glutamyl:cysteine ligase YbdK	0.637575	0.35991	-2.04887	-1.77631	-3.02818	-2.81716	-4.06043	-1.92255	-4.96258	-6.77602	-1.88542	-6.45032	-1.76673	-3.52337	-3.46162	-3.11146	-0.463521	-1.0227	-1.51812	-3.45867	-3.35181	0.904544	-3.51414	0.23594	-0.635132	-0.94217	-0.990616	-2.42971	-2.45725	-2.0791	-6.28176	-5.60359	-1.30664	0.864705	0.838068	-1.35272	-6.02022	-4.53173	1.46081	-3.11998	-1.47763	-2.36376	-0.965842	-4.88654
b0582	insL-2 IS186/IS421 transposase	0.213476	0.360159	-0.752348	0.303889	-1.23451	0.842894	-1.06725	-0.739916	-0.730655	-3.19267	-0.141765	-4.06409	-0.227675	-0.881976	-1.0691	0.126426	-2.01205	-2.14979	-5.5648	0.343338	1.66404	-0.35042	1.00467	-0.64173	-0.903171	-0.790984	-0.718459	-1.34952	0.896346	-1.46894	-3.94943	-4.70376	-2.14813	-1.95678	-2.12854	-0.0328439	0.663625	-1.28336	-0.940907	-0.128041	-4.50399	2.6433	-1.64691	0.11203
b0583	entD phosphopantetheinyl transferase	1.77978	0.527757	-1.48045	-2.78788	-1.48128	-3.89888	-2.49587	-2.41892	-4.2775	LQ	-2.75916	-1.99276	-3.9436	-2.47785	-2.81275	-3.3659	-5.06946	-4.7269	-3.42231	0.746741	0.314012	-2.7729	-2.45872	-2.46685	-1.46794	-0.380482	-0.967907	-3.49069	-0.981017	-1.74566	-7.371	-7.19804	-2.48302	-1.55948	-2.18837	-1.54405	-5.63236	-2.21569	-2.66685	-4.02513	-7.26574	-1.15554	1.17774	0.125382
b0584	fepA FepA, outer membrane receptor for ferric enterobactin (enterochelin) and colicins B and D	-0.681434	0.34432	-7.76941	-2.41668	-2.94514	-3.22494	-7.45104	-3.7129	-7.39595	-0.501512	-3.53754	-0.299073	-2.87067	-1.9372	-2.40436	-5.05573	-3.90864	-4.70118	-2.08841	-5.55508	-7.32324	-2.28604	1.69588	-0.882185	0.0998783	-2.24396	-2.19009	-2.77787	-1.76945	-0.504544	-4.70145	LQ	-2.45932	-0.717812	-1.74507	-2.46559	-7.13538	-1.3092	-4.32766	0.315936	-6.76816	2.16562	-1.9517	-7.38609
b0585	fes enterochelin esterase	-0.871566	0.502384	-4.52128	-2.76928	-0.90681	-2.33376	-5.60772	-0.267582	-3.83346	-2.60857	-1.38551	2.14131	-1.11609	-1.41746	-2.00855	-5.3002	0.523651	0.67212	-2.15214	0.904528	-4.85306	-5.10032	0.550903	0.800988	1.81971	-0.220468	-0.318065	-0.231464	-2.86603	-2.37854	-3.22868	-5.04719	-1.85607	1.1491	1.40179	-1.62506	-5.99999	0.686606	-5.14613	0.46382	-5.0912	0.236027	-0.476395	-4.89683
b0586	entF serine activating enzyme	-0.789576	0.765671	-0.845455	-0.919611	-0.720219	-0.258183	-2.72918	0.792576	-2.31477	-0.0171597	-0.140922	0.183806	-0.621653	0.0641454	0.155714	-1.90447	-0.103591	0.405186	-0.155312	0.917984	-1.71384	-1.14898	0.320506	0.232409	0.572936	-0.723087	-0.14713	-0.981617	-0.64059	0.312704	-0.496074	0.16664	-0.785197	0.552016	-0.51553	0.499638	0.235067	-0.0435254	-1.26068	-0.427069	-0.973496	-0.126669	-1.24965	0.624613
b0587	fepE ferric enterobactin (enterochelin) transport	1.48661	0.27706	1.05646	0.347424	1.40685	-3.00967	-4.94307	2.21337	-5.0869	-3.19494	3.60305	4.20053	0.587317	0.712462	-0.00847222	0.947275	4.18256	4.30843	0.635636	2.29444	1.25672	5.37746	-1.9815	2.41086	2.59625	3.1736	3.1609	2.09778	-0.205461	-0.0292946	5.90937	4.81563	5.80193	5.76813	5.50333	0.611852	4.07662	-0.706766	6.38676	1.69114	7.67941	-1.95107	4.53851	3.49563
b0588	fepC Ferric Enterobactin Transport System	-0.445287	0.506126	-2.26547	-1.02596	-1.52201	-0.96807	-3.0108	0.322316	-4.28914	-1.67883	-1.02681	-0.860044	-1.68392	-0.667741	-0.0244912	-1.88819	-0.887714	-0.211555	-1.74986	-3.46334	-2.61962	-1.11459	-1.10446	-2.34086	-1.60308	-2.2368	-1.13106	-1.55106	-1.38269	-1.30145	-2.13305	-0.738405	-2.8078	1.31429	-0.756113	-2.06523	3.77724	-0.596291	-3.45672	-1.52271	-1.99056	-2.78272	-1.58777	-1.25948
b0589	fepG Ferric Enterobactin Transport System	-2.70747	0.714049	0.50009	0.727277	0.30524	1.15157	0.940899	0.766447	-1.76811	1.95903	1.42107	1.33628	0.87983	0.866875	0.878394	-0.183507	0.159102	0.632051	0.812685	-0.957993	-0.831339	-0.594159	1.1879	-0.458962	0.807139	-0.458325	0.0733719	-0.661809	1.05757	1.11386	-0.29317	0.0429676	-1.26401	-0.0321557	2.12025	-0.693468	-0.596214	1.83137	-1.1147	1.09649	-0.619831	-0.41843	0.080471	-0.227706
b0590	fepD Ferric Enterobactin Transport System	-3.01892	0.760639	0.130351	0.634896	1.45231	1.31201	0.0636724	0.693401	-1.44852	1.24366	1.4063	1.42282	0.897751	0.941776	1.05947	-0.118954	0.201163	0.365602	0.996511	-1.21375	-0.712277	-0.757249	1.28363	1.92963	0.87092	0.114128	-0.575881	-0.494672	1.03586	1.16662	1.47132	0.534702	1.1678	-0.475983	-1.52093	-0.587295	-1.45275	LQ	-1.50546	1.25586	-1.12624	0.334443	0.0133519	0.399694
b0591	entS EntS MFS transporter	-1.92535	0.935331	-0.0445051	-0.67681	-0.0397615	-0.147779	-0.802586	1.2596	-1.11889	-0.591112	0.979274	0.148439	1.26913	0.596305	0.386542	0.160352	-0.592949	-1.1942	2.25435	-1.80583	1.08468	1.09791	1.94747	1.02952	1.30824	-1.02171	-1.2318	0.805126	0.813164	1.7822	-1.26199	-1.96253	-0.360843	-0.213397	1.39776	1.12151	-2.08115	0.800101	-2.07333	0.934676	-1.3264	0.862767	-0.683118	2.2322
b0592	fepB Ferric Enterobactin Transport System	-0.410104	0.684202	-2.96387	-2.53114	-2.10778	-2.39847	-4.42917	-0.189294	-3.64639	-1.01155	-1.60925	-1.18299	-0.765362	-2.66152	-2.23004	-3.59936	-3.25024	-3.06056	-1.88127	-4.54371	-3.87791	-3.85911	-1.4758	-2.99622	-1.50902	-2.87885	-2.46036	-1.93388	-0.24313	-0.527279	-3.86094	-4.27957	-2.60636	-3.38971	-3.92125	-2.79225	-4.80031	-1.22254	-4.02139	-1.52687	-3.11047	-1.60796	-3.16336	-2.05394
b0593	entC isochorismate synthase 1	-0.0734925	1.05041	-2.23688	-2.43126	-1.00476	-0.563804	-3.46167	-0.849472	-1.17654	LQ	-1.92847	-1.25369	-1.59386	-0.710725	-0.841806	-2.11436	-2.50604	-2.28576	-1.51067	-3.05031	-2.4538	-2.37293	-0.639722	-1.53173	-1.15663	-1.18823	-1.11661	-2.03724	-1.60105	-0.516514	-2.54212	-2.91698	-2.05339	-2.05025	-0.759648	-1.44505	-3.16538	-0.403148	-1.97798	-0.382883	0.555916	-0.118778	-2.04606	0.213078
b0594	entE enterobactin synthase multienzyme complex	-0.806212	0.608074	-1.80257	-1.06343	-0.942951	0.0458482	-2.28796	-0.275113	-1.67499	1.02049	-0.23636	-4.9595	-0.752986	-1.0849	-1.05869	-1.26085	-1.07606	-0.611665	-0.546445	-3.54506	0.0605076	-2.23835	-0.732862	-1.73556	-1.06584	-0.625465	-0.0987514	-2.10902	-2.58193	-1.30992	-2.28549	-1.53917	-3.59006	-2.53964	-2.83652	-0.441049	-0.0244055	LQ	-3.93094	-3.19657	-5.78173	-4.12139	-5.09299	-1.40635
b0595	entB apo-EntB	-1.20535	0.707066	-0.202302	0.432508	0.428706	1.34166	4.70231	-0.915279	-0.47715	1.16471	-0.115545	0.222826	-0.0422073	0.506863	0.476625	-1.66826	1.32865	1.41	-0.178784	-1.91912	-1.53138	0.0775261	1.02554	0.684345	0.809107	-0.0776465	0.230153	-1.27774	0.0967539	-0.065372	-2.188	-1.80377	-2.12719	-0.581618	-2.76268	-1.0181	-2.12944	0.692099	-2.08125	-0.0281152	-1.66094	-1.76853	-1.14002	2.25011
b0596	entA 2,3-dihydro-2,3-dihydroxybenzoate dehydrogenase	-0.0357512	0.5736	0.325512	-1.43604	0.731808	-1.92743	-2.92523	-1.12177	-3.65398	0.453949	0.520985	-0.676059	-1.74375	-0.377802	0.0981359	-1.99452	-0.681334	-0.445195	0.687896	-5.52237	-1.95548	-4.82382	-0.524246	-2.64128	0.606427	-0.534767	-0.118451	-0.415613	-0.4713	-1.23389	-5.45983	-4.67765	-0.266636	-1.49324	0.554885	-2.99908	-5.44	-1.30602	-6.20713	-2.29492	-3.29745	-3.55701	-0.400861	0.446949
b0597	entH thioesterase	0.173806	0.231084	-2.47199	-3.4311	LQ	-1.13538	-7.18576	2.52804	LQ	1.6931	-3.38221	-2.95058	1.20302	-1.78624	-0.821672	0.149769	-8.66735	-4.31715	1.26121	-1.35892	1.08896	-1.35528	0.969037	-5.70251	-1.22086	-0.642312	-0.0483354	-2.43152	-3.47754	2.98309	0.526189	0.435551	-1.43443	-3.73533	-0.438743	-1.45625	-7.86416	-0.606479	-9.06616	3.4814	-7.09075	-1.90195	0.488904	1.23425
b0598	cstA peptide transporter induced by carbon starvation	-0.865312	0.570365	1.83849	1.05791	0.660446	1.06181	-0.318237	LQ	-1.55096	1.88493	1.72086	1.13525	1.07914	1.48281	2.07103	-0.87205	0.776889	1.0027	2.79158	-2.78533	0.532798	-1.18993	3.08816	1.88636	2.1666	-0.600468	-0.301441	0.431159	1.30249	2.08659	-0.568166	-0.36331	0.322204	1.87783	-0.652675	0.482756	-2.7663	2.22636	0.581036	2.14541	0.80062	-0.0542296	0.639673	1.49673
b0599	ybdH predicted oxidoreductase	-0.214639	0.286472	-1.70635	-2.96191	-0.177545	-1.35978	1.32975	-3.72325	-0.781125	-1.97464	-0.385856	3.35113	0.173509	1.02427	1.29503	-0.0741272	-5.28273	-3.96981	-3.41246	-7.20402	-5.44798	-4.22014	0.791117	-0.875596	1.91445	-2.56688	-1.79584	-0.832474	-2.07852	2.26983	-6.67658	-5.95397	-1.58832	-4.52598	0.617957	-1.85852	-3.85844	2.39479	-7.05727	1.63284	-7.47923	2.47997	-4.26762	1.24787
b0600	ybdL methionine aminotransferase, PLP-dependent	-0.333376	0.70151	-0.454346	-0.495463	0.428002	-0.601899	-2.89846	-1.5771	-1.32876	-1.3603	0.843785	0.0638586	0.269116	-0.741424	-0.581677	0.061979	0.983878	1.46905	1.61639	0.22032	0.36593	-2.27412	0.821915	-1.28531	-0.750304	-0.0087313	0.253985	-0.593528	-0.351196	0.279839	-2.99008	-2.43174	-0.940056	-0.863273	-0.0211411	0.595675	-1.53836	1.21068	-1.0189	1.78992	-3.48768	0.591852	-1.76451	0.0469303
b0601	ybdM conserved protein	0.599288	0.330097	-4.08824	-0.747054	-0.270909	1.17603	-6.99251	-2.22134	-4.04512	-1.80061	2.15947	-0.0387403	1.76074	1.18788	1.0954	0.209832	7.1661	6.87585	-0.839585	2.80601	-2.2973	1.78473	-0.882199	3.58279	-1.9638	0.468614	0.218091	0.682368	2.61319	-0.034041	5.09548	5.19515	-0.268751	2.63796	-0.554699	-0.741266	-1.43193	-0.0642902	3.26203	-2.15105	-5.65889	1.11135	-4.37865	-0.33623
b0603	ybdO predicted DNA-binding transcriptional regulator LYSR-type	2.16475	0.941559	-1.4166	LQ	-0.699851	LQ	-2.8802	LQ	-1.5355	-3.30758	0.209844	-1.45201	-0.802767	-0.482438	LQ	-0.755536	1.17721	LQ	-0.733315	-0.36456	-0.923282	1.04606	-1.59056	-0.0812699	-0.687888	0.578192	0.946702	0.163408	-0.952347	-0.927609	1.6408	1.53499	1.33149	0.493393	0.615081	0.239037	-3.16251	-1.04521	LQ	-0.677709	1.50609	-1.85683	1.62087	-0.513686
b0604	dsbG DsbG oxidized	1.33571	0.522285	-3.1831	-1.89278	-3.53614	-1.44228	0.713257	-0.191622	-1.87212	-4.86597	-0.470008	-1.51626	-0.940239	-2.00325	-1.81841	-1.60449	-4.69138	-3.73624	-0.00272578	-4.07753	-0.692846	-2.98494	-1.04293	-1.46308	-1.3345	-1.1177	-0.921924	0.238022	-2.11582	-1.68341	-1.17211	0.195832	-1.00565	-2.11294	-2.30141	-0.808088	-2.65556	-2.84835	-1.18571	-2.09043	-1.79938	-0.680314	-0.524637	-1.47227
b0605	ahpC AhpC component	1.46541	0.905696	-4.19334	-3.24731	-3.38947	-2.56804	-3.26535	-2.67092	-2.22168	-1.4847	-3.29826	-2.88921	-3.10191	-2.6454	-2.54722	-3.01426	-3.4231	-2.99691	-2.79312	-3.86337	-1.64915	-2.86974	-2.33611	-2.89842	-2.56023	-2.64048	-2.47664	-2.51601	-2.85219	-2.07849	-4.28265	-3.73333	-2.24333	-3.51874	-4.24626	-2.0745	-3.99445	-2.50968	-0.481253	-2.89801	-3.70245	-2.4564	-0.889012	-2.03785
b0606	ahpF AhpF component	-0.972193	0.250315	-3.24131	0.633356	-1.99092	1.73172	0.168017	-2.90947	-3.20718	-1.01845	1.6694	2.58477	1.12838	0.353701	0.687033	2.71365	5.6987	6.41322	1.58204	-4.8881	2.77358	2.24233	3.84747	-3.4885	-0.573874	-0.634096	-0.679116	-1.1934	-1.8304	-0.0347162	-2.14651	-1.61373	-1.15564	-2.98284	0.308689	1.23837	-6.95558	4.00837	-4.02307	-0.522164	1.84431	1.62667	-1.31406	5.10479
b0607	uspG universal stress protein UP12	1.2038	0.728051	-1.31715	LQ	-1.04783	LQ	-3.85443	LQ	-1.65327	-1.22915	-0.257475	-1.15267	-0.473886	-1.27776	-1.19574	-1.06387	-0.910405	LQ	-0.628865	-1.00645	-1.06097	-1.71715	-0.747385	-1.13385	-0.873671	-1.67922	-1.56238	0.847075	-0.891902	-1.22441	-0.667172	-0.801602	-1.64086	-2.00059	-1.01144	-1.24089	-1.35005	-0.839799	-0.873181	-1.0174	-1.92833	0.113991	-1.71601	0.186407
b0608	ybdR predicted oxidoreductase, Zn-dependent and NAD(P)-binding	1.09845	0.462261	-0.0476928	-1.45843	-1.87415	-1.337	-8.87549	-6.447	-3.5767	-0.491154	0.129967	-4.85861	-0.80214	-1.19102	-1.90375	-1.78654	-3.73409	-4.64437	-3.33005	-1.92935	-2.02965	-1.43169	-0.392173	0.890523	-0.6278	-0.921274	-1.3967	-0.388562	-1.05613	-1.75559	-5.91862	-6.06962	-0.601405	-1.49198	0.204706	0.521912	-2.68133	-0.896798	-1.97684	-1.74445	-2.52424	-1.35342	-2.65359	-2.41448
b0609	b0609	-0.391918	0.514785	-1.62522	0.40252	-0.173261	1.20658	-2.15679	LQ	0.285515	-0.661188	2.16973	-0.0640596	2.03444	0.853112	0.570195	0.243931	-0.0654776	0.0817488	-1.06314	-1.87332	-1.62148	1.97319	1.25677	0.699622	1.17052	0.420351	0.541007	0.675861	-0.065378	0.74002	-2.96428	-2.11509	-0.900922	-0.702041	-1.3293	2.03978	-2.36479	0.811726	-1.31221	-0.0734679	-1.41076	2.97268	-0.679792	-1.56805
b0610	rnk regulator of nucleoside diphosphate kinase	-0.160336	0.364467	-1.88348	-2.84376	1.57136	0.0387611	-4.40044	-5.0419	0.801462	-2.90135	1.33057	-0.711632	2.8211	-2.71377	-2.76019	0.648082	-3.2282	-3.18903	-10.5673	-10.9656	-4.60456	-0.590916	1.44478	-3.88842	-0.264531	-0.901517	-0.456641	0.2125	-5.91902	-3.42938	-10.44	-9.21726	-2.72233	0.904967	-2.73638	0.605789	-11.4183	-3.7143	-1.1339	-3.83055	-6.66419	-0.703128	-1.79441	-3.97529
b0611	rna RNase I, cleaves phosphodiester bond between any two nucleotides	-0.882932	0.717614	-0.0291719	-0.922088	0.304042	1.49189	1.60221	0.350171	-0.356483	0.678034	0.447043	0.188134	-0.00912203	0.712401	0.931984	1.1625	-0.38148	-0.282735	0.41811	-0.206157	-1.07899	0.127619	0.458245	-0.774043	0.0345182	0.391027	0.624354	-0.193684	1.99059	1.21771	0.363932	0.833886	0.54681	-0.153504	0.108886	0.741694	-1.05229	0.596006	0.107169	0.000323472	-1.12596	1.39175	0.593846	1.78217
b0613	citG triphosphoribosyl-dephospho-CoA synthase	-0.570902	0.289992	3.07213	0.966893	2.18047	1.51383	2.84848	1.07368	-2.13751	1.31579	2.41389	6.95362	1.84244	0.793744	0.503916	0.850823	-3.41244	-2.38795	5.65612	2.88756	7.64368	2.57354	1.29361	2.13584	3.02978	-0.34854	-0.182367	-1.38459	4.19828	1.75835	-5.2566	-4.72501	2.72859	2.87181	1.82986	-2.74777	3.13227	2.27171	4.94972	3.13396	-4.1821	4.06183	1.65769	0.0848609
b0614	citX apo-citrate lyase phosphoribosyl-dephospho-CoA transferase	0.181092	0.492275	1.05269	-2.16406	-0.59429	-1.59228	-3.60317	-1.14687	-4.09167	-1.18466	-0.356835	-0.829041	-0.874333	-1.55081	-1.8243	-1.48234	-4.16288	-3.32366	-1.56094	2.62566	1.20911	-1.42625	-1.19569	-2.88789	0.603592	-0.817907	-0.756681	-2.30016	-0.671174	-1.57918	-4.98422	-4.18502	-0.498243	-1.29239	-1.20368	-1.66879	-3.35795	0.513727	-2.87251	-0.592092	-4.47815	1.08269	-0.275875	-2.5452
b0615	citF citrate lyase, citrate-ACP transferase alpha; subunit	-1.42214	0.70973	1.82443	0.887154	0.246039	1.1529	-1.4246	-0.0239115	-1.10725	-0.0123418	1.63357	0.780728	0.735032	0.627285	0.572379	1.93825	1.71694	1.43906	-0.201853	-1.82941	1.67296	-0.463252	1.13291	1.88369	1.88941	-0.45651	-0.249194	0.380205	0.501143	-0.0973097	1.74419	2.24803	-0.0858095	2.52188	0.525143	-0.0225422	0.680061	1.01813	-0.120074	-0.468714	-1.7093	0.53739	-1.73613	1.12078
b0616	citE citrate lyase, citryl-ACP lyase beta; subunit	-1.03814	0.532272	0.367166	-1.37627	-1.27151	-0.0613408	1.7322	-0.793164	-1.87266	-2.08152	0.601996	-1.78738	-0.209007	-0.235526	-0.00150008	1.00627	-3.01748	-1.92096	-2.72137	0.349288	2.79288	-1.08367	1.33962	-1.57452	-1.19619	-0.0801847	0.247817	0.253331	-2.34675	-0.712635	-4.5561	-3.63126	-0.433237	-0.598044	1.94519	-0.184533	-3.89336	1.57258	-2.89316	0.83991	-3.0928	1.49665	-1.76778	-0.360788
b0617	citD citrate lyase, acyl carrier gamma; subunit	-0.446103	0.636881	-1.29573	-1.73755	-0.460681	LQ	-0.953744	LQ	-2.3039	-0.309063	0.00416418	0.509569	0.691984	-0.0854224	-0.477655	-0.389044	-0.68359	-1.12463	-0.189678	-0.944101	-1.10284	-1.67259	0.75249	-0.890451	0.201787	-0.0988177	LQ	-0.888762	-0.0573629	0.094632	-2.61124	LQ	-1.23978	-0.866488	0.0636418	-0.275402	-2.23981	0.758049	-1.79713	1.4485	-1.62018	0.772207	-1.38052	-1.4064
b0618	citC citrate lyase synthetase	0.823338	0.335272	-3.60772	-4.18537	-1.36489	-4.03377	-3.93339	-1.83317	-4.13752	-9.37272	0.824872	0.371409	-2.25865	0.659036	0.384374	-2.37662	-1.21324	-0.553868	-1.16379	-1.86896	-2.50173	0.183943	0.169541	-2.54509	-3.69156	-0.0111306	-0.534309	-0.757897	-4.70945	-0.265124	-2.84474	-3.79947	-1.31826	-1.04019	-2.71333	0.012123	0.460346	-1.9191	-0.967714	-0.868385	1.05286	-3.47258	-0.791511	0.786979
b0619	dpiB sensory histidine kinase in two-component regulatory system with DpiA	-0.248307	0.459748	0.22321	-0.474049	-0.00466446	2.09035	-0.680829	0.0325987	-2.50749	-1.89798	0.934388	-1.30781	1.44506	1.40169	1.251	1.63941	2.79843	2.5348	0.333768	1.56872	-1.40566	2.66805	2.80515	1.80057	3.32861	2.78755	2.77515	0.344983	0.582791	3.21461	-0.285446	-1.43314	1.50997	2.14866	0.970205	2.41074	-0.378334	1.6068	-0.171406	3.14259	0.804483	3.60854	2.4753	-0.158262
b0620	dpiA DNA-binding response regulator in two-component regulatory system with DpiB	0.111918	0.741498	1.5047	-2.07567	0.115904	LQ	0.0208482	LQ	0.414553	0.830351	0.941612	-2.00258	0.929952	1.4007	1.52204	0.841519	1.97725	2.06211	2.40275	-0.76539	-1.70049	0.0714237	0.954545	-1.30991	-1.24612	-0.186422	0.347895	0.975369	1.51878	1.01614	-4.03827	LQ	-0.493664	-1.65517	0.30878	1.76562	1.29015	0.601618	LQ	0.696666	-3.13763	-0.143163	-1.37339	3.2527
b0621	dcuC DcuC dicarboxylate transporter	0.0129441	0.29783	1.51799	0.0917572	-1.32145	0.496854	-4.22625	2.08734	0.523681	-3.73453	2.38886	2.09571	1.55502	2.84178	1.81763	0.901811	4.65553	4.69279	2.74228	7.46703	1.35956	3.78658	-1.28859	-0.233444	3.13023	1.08152	2.02115	1.70014	2.97231	3.28497	2.54892	2.71694	1.90526	-0.18051	0.86951	0.787526	3.41076	0.70732	1.92357	-0.724543	4.81023	0.636386	2.44763	1.84025
b0622	pagP PagP monomer	1.53557	0.334956	-2.42845	-2.87337	-2.59256	-0.345289	-8.45756	0.539525	-3.88195	-6.15462	-1.08349	-2.01773	-0.980705	-1.93829	-2.73669	-1.64629	-1.61599	-2.16168	-2.64625	2.96865	-0.664182	2.12371	0.544091	0.427824	-0.201299	0.538723	0.0118308	1.47471	0.449227	-2.73448	5.25588	4.63924	0.305782	-0.881121	0.477706	2.14543	2.87094	-0.466199	-1.76593	-0.783938	0.964289	-1.87841	-1.11667	-0.446668
b0623	cspE transcription antiterminator and regulator of RNA stability	-0.118855	0.933793	-0.386834	0.00775642	-0.230829	-0.117969	-0.875344	LQ	-0.0504943	0.101182	-0.633636	0.489362	-0.783083	-0.152113	0.102297	-0.631693	-0.287051	-0.154525	0.462575	-0.517739	-0.741581	-0.624811	0.333967	-0.516797	0.310933	-0.255396	-0.105279	-0.407154	0.410387	0.540816	-0.895428	LQ	-0.616105	-0.170333	-0.0958618	-0.274185	-0.642929	0.888764	-0.702911	0.30383	-0.68528	-0.48082	-0.397047	-0.483643
b0624	crcB protein involved in resistance to camphor-induced chromosome decondensation	0.0336621	0.390652	-2.86794	-1.89013	-2.10225	-0.353707	-3.45925	LQ	-1.17535	-1.50741	-0.608987	1.19234	-1.07176	-1.39121	-0.862831	-2.60077	-3.08351	-1.75278	0.517332	-0.150064	-2.69308	-2.13439	-1.78838	-0.338669	-1.20845	-1.12157	-0.727657	0.232548	1.68455	0.804476	-4.43036	-2.727	-1.85488	2.40442	-0.542564	-2.60828	-3.41032	0.280479	1.04858	-1.72231	-3.19977	-2.99117	1.88089	-2.79261
b0625	ybeH predicted protein	-0.465612	0.390396	-0.512245	-0.209868	-0.987693	LQ	-1.42758	LQ	0.252328	0.236068	1.49335	2.7713	0.773265	-0.0827896	-0.216196	-0.858149	0.287862	0.222616	0.183272	-1.28255	-1.88941	0.587018	0.828898	0.471647	1.19028	0.0931361	0.401668	0.639512	1.16821	1.60552	-2.27545	-1.09688	-1.51726	0.637722	-2.23823	1.3059	-0.827713	2.00579	0.81862	0.342773	-0.984617	0.126804	0.282935	0.578889
b0626	ybeM predicted C-N hydrolase superfamily, NAD(P)-binding amidase/nitrilase	-1.62798	0.769762	1.69124	0.598235	0.868666	0.988726	0.28227	0.40278	-0.314011	0.829412	1.70718	1.37261	1.10495	0.830359	0.602197	0.118383	1.55608	1.54222	0.905202	-1.15056	0.524878	0.757601	1.521	1.0316	1.85537	1.03763	1.10373	2.7693	0.906415	1.37231	-1.17168	-1.09536	0.499372	0.670427	0.921705	3.04421	-1.04528	1.93817	-0.846447	1.46133	0.621222	1.22212	0.728469	2.46912
b0627	tatE TatABCE protein export complex	-0.566052	0.629289	-0.138195	LQ	0.124166	0.419454	0.814468	LQ	0.110619	1.39831	1.15925	0.996905	-0.710524	0.660099	0.614284	-0.0802242	-0.53343	0.2096	0.609492	-0.729168	-1.00652	0.211449	1.62973	0.0124211	1.08931	1.75852	1.50382	-0.384069	0.66532	1.95565	-1.45577	-0.636512	0.0081176	-0.26691	-0.956493	1.52473	0.151189	1.22941	-0.631184	2.05157	-0.539206	1.41727	0.696349	-0.458995
b0628	lipA lipoate synthase monomer	-1.64329	0.546136	5.63675	5.82712	0.175958	2.02649	10.8516	5.89911	1.81444	3.09047	0.651197	-0.134234	-0.269353	0.042918	0.643143	-1.1333	-0.147815	0.701075	-0.876308	-2.86433	-1.88652	-0.891442	0.501704	-0.580806	-0.539018	-0.707277	0.376343	-0.00203342	-0.199451	1.29567	-2.81569	-1.6977	-0.895904	0.431292	-2.08485	-0.627905	-1.7908	0.45404	-0.84246	-0.775938	-2.19449	-1.12092	-0.874436	-1.07955
b0629	ybeF predicted DNA-binding transcriptional regulator, LYSR-type	1.88447	0.546845	-0.756237	2.41765	-0.554297	-0.777487	-2.94768	2.7821	-1.64188	-0.451726	-0.337185	1.12864	-1.66219	-0.907694	-0.94962	-3.07623	-0.846371	-0.523215	-1.48498	-4.23042	0.146472	0.379637	-0.720013	1.1465	-0.27983	-0.445427	0.128293	-0.300052	-0.244038	-3.01611	1.87218	2.28348	0.735206	-0.432216	-0.140977	0.170324	0.245507	-0.274547	-0.222935	-0.192553	-4.41933	-4.42436	2.12203	-0.0631408
b0630	lipB lipoyl-protein ligase	-0.756558	0.229697	26.0562	25.3786	13.8316	18.5629	33.1971	27.3885	16.4374	16.6298	-0.382286	-2.49498	2.6917	2.40033	3.28719	3.77951	5.11749	5.28325	-2.1529	3.03474	10.5342	3.7903	-0.82976	2.48186	-2.10365	-3.68153	-1.18758	2.38444	-0.718059	-2.8403	-4.25509	-1.84415	-4.39166	-4.12906	2.46255	5.22373	0.523021	0.657942	-4.51104	-1.63261	-2.41691	-2.96655	-4.18344	5.12276
b0631	ybeD conserved protein	-1.50935	0.503699	2.8395	LQ	2.44997	LQ	5.45859	LQ	3.01538	3.28488	0.589274	2.57458	0.323388	1.3228	1.53615	0.656239	0.909623	1.71255	1.92959	1.03203	1.46711	1.36929	1.98499	1.40378	1.93669	0.664708	1.46943	1.3488	2.47171	2.47721	0.424581	1.19041	0.265107	1.26354	-0.0487485	1.33894	3.44254	2.8628	0.829103	1.83141	0.930342	0.257619	1.35526	1.13323
b0632	dacA D-alanyl-D-alanine carboxypeptidase, fraction A; penicillin-binding protein 5	-0.448918	0.582392	-0.90982	-0.0480857	-2.21894	-0.257214	-0.743114	-0.207842	-0.668768	-0.0225719	-3.0075	-1.01671	-2.94666	-1.48231	-1.6354	-1.98821	-2.36956	-2.08688	-1.37498	-3.19755	-2.95855	-3.1924	-0.289123	-3.02768	-1.42133	-1.58639	-2.01671	-2.19212	-1.20248	-1.02246	2.82126	3.33616	-1.77152	0.180502	-4.05115	-0.9976	-3.38637	-0.844792	-3.50855	-1.37414	-2.55195	-2.45824	-2.7675	2.03817
b0633	rlpA rare lipoprotein RlpA	-1.32676	0.566186	1.28067	-1.62846	-0.00488105	-0.393342	-3.51987	-0.545547	-4.18725	0.984639	2.51785	3.35812	0.525168	1.34472	1.00369	1.54356	1.48504	1.54733	2.16407	-3.65486	-3.24011	-2.32239	1.94811	3.08414	1.57241	0.669454	0.455545	-0.0815281	-0.208832	1.5236	-1.7678	-2.39152	0.311845	-0.98577	-5.29007	0.7698	-3.52019	1.61043	-2.36752	-0.451818	-1.29382	1.04304	1.15107	-2.07649
b0634	mrdB rod shape-determining membrane protein; sensitivity to radiation and drugs	-2.86684	0.608848	0.0537595	1.32808	0.18165	1.82264	0.111671	0.365739	-0.332431	2.61004	2.553	3.33519	1.13786	2.12587	2.29284	0.449881	2.69975	2.31446	3.27437	0.44251	0.034033	0.343018	2.66233	1.69854	2.88611	3.49658	1.85779	1.13923	2.8841	3.23957	0.778345	-0.235126	0.803923	2.14482	-1.37016	1.3829	0.31019	3.24777	0.516619	2.72498	0.719343	0.081435	2.2369	2.82373
b0635	mrdA cell shape; peptidoglycan synthetase; penicillin-binding protein 2	-3.11191	0.477114	0.617912	1.07762	-0.252515	1.59141	2.03943	2.87137	-0.193976	2.31364	2.42225	1.77865	1.88222	3.24938	2.91863	0.94247	4.40082	4.42995	2.70358	-1.39709	-0.0847168	-0.957873	1.72325	-1.09088	2.03676	0.870008	0.255559	1.5668	1.34395	1.94162	0.176775	-1.01651	0.970544	0.0872015	0.446079	-0.769601	-1.83941	1.92966	-0.100441	1.74496	-1.37725	1.01154	LQ	2.75121
b0636	ybeA conserved protein	-1.90853	0.540698	-0.557662	-0.302025	-1.14469	-0.203261	-0.887311	-0.818906	1.00422	0.489671	0.146687	0.709498	0.232352	0.629032	0.426085	-0.696239	-0.187841	-0.158634	0.912762	-0.730008	-0.434225	-0.0206065	0.0150289	-0.594329	1.2468	0.329854	0.747181	-1.44119	0.857391	1.36875	-0.875869	-0.615073	-1.22156	0.156058	0.133208	-0.11684	-0.852811	1.71986	-0.555661	0.574957	-0.363855	-1.09986	0.973929	-0.513735
b0637	ybeB predicted protein	-0.818862	0.488103	-0.116968	LQ	LQ	LQ	0.161136	LQ	LQ	1.02177	0.188507	1.61688	-0.130629	0.529337	1.08461	0.396895	-0.435815	0.448354	1.58697	-0.481628	-0.192821	0.141635	0.690828	-0.0811985	1.04772	0.386099	0.87118	0.259688	1.61994	1.91398	-0.99558	0.0100864	LQ	0.274839	LQ	0.574406	-0.394885	1.8231	-0.365164	1.32496	-0.295995	-0.0745981	1.26735	0.10057
b0638	cobC predicted alpha;-ribazole-5'-P phosphatase	0.367709	0.812	-0.832295	-1.11855	-0.401617	-1.41584	-4.077	-2.96456	-1.64564	-2.44949	-0.0498853	2.17706	-1.10439	-0.761729	-1.03858	-0.221906	-4.01539	-3.85346	0.608768	-2.23521	1.09476	0.777876	-0.55755	-1.15075	-0.0950707	0.222994	-0.0867566	-0.573421	0.224542	-0.581822	-4.95898	-4.48235	0.190263	0.869634	-0.357226	-1.58073	-3.67001	-0.397478	-0.385837	0.381706	-2.11161	-3.27995	0.122706	-2.20202
b0639	nadD nicotinate-mononucleotide adenylyltransferase	-1.5655	0.48848	-0.562807	0.269704	-0.256206	1.36898	-0.329836	-0.239935	-0.133468	2.10773	1.32648	1.50404	-0.0371798	0.732232	6.31778	1.40362	-1.01298	-0.283472	1.00373	-0.820267	-0.605627	-0.139342	0.182016	-0.00868615	0.776484	-0.866968	0.465619	0.200034	0.515533	1.34017	-2.13541	-0.947243	-1.35175	-0.00612186	-2.05326	0.354414	0.791095	1.58975	0.766188	1.89048	2.48193	0.123282	0.820026	-0.514109
b0640	holA DNA polymerase III, delta; subunit	-2.93376	1.1145	-0.185047	0.336756	0.704184	1.58195	0.413567	0.394402	0.439666	1.55033	1.60973	1.02963	1.44393	0.665486	0.741981	0.984631	1.07624	1.04917	2.86771	-0.0214417	0.219859	0.622094	1.46867	0.630114	0.897319	0.692699	0.567115	1.48843	0.991771	1.05766	-0.0594487	-0.312084	-0.300285	0.524339	-0.373969	1.17028	-0.142591	1.27332	1.39453	1.08847	0.21486	2.74927	1.71685	0.083545
b0641	rlpB rare lipoprotein RlpB	-2.64631	0.664129	-0.0628436	0.655844	1.25164	0.975069	1.09736	0.736526	0.921529	1.23879	1.33653	1.83826	0.695873	1.29561	0.824318	0.915959	0.593328	0.16047	1.33159	-0.00795639	0.265207	0.300142	1.66505	-0.19858	1.60092	0.404804	0.209126	0.557879	1.41542	1.82266	-0.147565	-0.495144	0.553261	0.440789	-0.146743	-0.00483841	0.0278338	2.02186	-0.0788196	1.50499	0.349833	0.43309	0.857917	1.68237
b0643	ybeL putative alpha-helical protein	0.609095	0.55419	-2.24689	-1.41356	-1.14086	LQ	-2.81628	-1.90256	-3.37016	-2.73057	-0.147904	-1.59863	0.218308	-1.22187	-0.971465	0.541623	-2.67406	LQ	-1.94023	-0.472041	-1.9921	-2.13921	0.254268	-1.71971	-0.149163	-2.6627	-2.06636	-1.34029	-0.861772	-2.00293	-2.38313	LQ	1.22696	0.12817	0.354283	-0.0846625	-3.78884	-0.679112	-0.843611	-0.490232	-2.38117	-2.02994	-2.9398	-2.24933
b0644	ybeQ conserved protein	1.35006	0.25923	-0.315401	-3.60444	1.17189	-5.08681	1.38835	LQ	-5.257	-3.57953	2.267	-0.735341	1.6286	-4.40581	-3.28315	0.980776	-4.30138	-4.32664	-2.77934	-4.80278	2.27992	-4.38557	-3.09942	-4.45992	-2.15392	-4.31373	-5.63908	2.34071	-1.45776	-2.18303	-3.92164	-2.7642	3.97571	-4.27023	2.31349	-5.04633	-5.55416	-1.29149	-5.25694	-2.73735	-3.89415	-2.63814	-4.82212	1.15205
b0645	ybeR predicted protein	1.14779	0.425956	1.34258	1.7974	1.04078	0.868767	-0.446554	1.2112	-3.18358	LQ	2.59764	-0.218234	2.50252	0.628889	0.641113	1.34353	5.09471	4.1266	0.32661	1.91722	0.975894	2.33336	2.22785	3.49224	2.11706	2.53435	2.2851	0.684809	1.1648	3.33266	1.50949	1.58664	2.17267	3.06217	3.55387	2.75834	1.31617	2.30992	1.36361	2.39171	-3.26684	2.62634	2.17268	4.26941
b0646	djlB predicted chaperone	2.12934	0.461585	2.27377	0.542234	0.574729	-0.590471	-0.563311	0.317804	-2.54753	-4.90525	1.59592	1.85197	1.12028	0.793534	0.990312	1.12485	0.607268	1.23162	1.37849	1.9168	3.76275	0.980323	0.395033	1.41172	1.71873	1.23674	2.21275	2.75603	1.47584	1.95378	0.822428	2.09421	2.42627	0.907995	2.03846	0.883219	2.42484	-0.0704024	1.882	1.68734	4.84451	2.2389	1.39895	2.93198
b0649	djlC Hsc56, co-chaperone of Hsc62	0.70856	0.280412	0.302476	-2.67301	-3.38042	0.367196	-0.194596	-4.40546	-2.47137	-3.25907	-0.471583	1.24714	-1.99765	0.142952	-0.574565	1.24687	-0.360615	-1.36706	-3.94702	-0.286166	-1.82431	4.73936	1.898	1.71981	1.75413	1.30178	1.3064	-0.273917	-0.483748	2.27123	-1.09317	0.344786	-0.891449	2.31949	-0.09155	-0.75552	-2.18236	-0.129367	2.7094	-0.326951	4.73528	2.57023	-0.241225	4.35517
b0650	hscC Hsc62, Hsp70 family chaperone, binds to RpoD and inhibits transcription	0.548423	0.462346	0.315323	-2.07903	-0.853683	-0.468569	0.844701	-1.14138	-1.6592	-1.719	0.807546	0.905937	0.476507	1.13441	1.10489	1.48768	-0.837627	-0.849993	-1.12821	-0.366434	2.23031	-0.0383973	0.42525	-1.63079	-0.274021	-0.527966	-0.276968	0.819007	0.902158	0.440836	1.82059	2.6602	1.02714	2.10733	0.932784	0.916883	1.24104	0.716921	1.13845	0.624271	-3.61871	0.585772	-4.44069	-2.37686
b0651	rihA ribonucleoside hydrolase 1 (pyrimidine-specific)	0.9032	0.353847	-1.0374	-2.69427	-2.40779	-0.770468	0.591068	-1.75068	-4.59407	-2.24812	-0.523551	-1.62121	-0.268127	-0.0208579	-0.0908753	0.546155	-1.48887	-1.10038	-1.06355	-0.312373	-0.265992	-3.01766	0.156041	-0.369905	-1.24002	-1.30066	-0.972399	0.839753	-3.45463	0.167488	5.10497	6.27575	-3.77615	-2.03073	-0.476449	0.148543	-0.692767	-1.48938	-3.25559	-1.16822	-3.16401	-0.318476	-2.5151	-0.16271
b0653	gltK GltIJKL glutamate ABC transporter	-0.154852	0.486445	1.59014	-3.96564	-0.915546	0.294008	-0.565515	-1.81454	-0.977574	-0.948724	0.152626	0.0453528	0.0925264	1.32238	1.49392	-0.680006	-3.61993	-3.8485	2.46274	2.32426	-1.59109	-2.46723	-0.27719	-3.99575	-0.826282	0.303123	-0.0329661	-0.378466	0.0129354	-0.304408	-4.31797	-4.86932	0.0521094	0.933682	0.0753427	-1.55558	3.94397	0.392435	0.889121	0.153401	-5.63688	-1.34764	-0.493825	-0.80906
b0654	gltJ GltIJKL glutamate ABC transporter	-0.167268	0.274511	-1.7103	-7.20758	-2.74223	-2.49084	-0.583716	-4.19457	-6.86455	1.89174	0.723127	-0.327797	-2.69808	0.454055	0.662106	0.316714	-7.93895	-6.07282	3.24114	6.39109	-6.02234	-5.50266	-1.15489	-9.22712	0.89448	-1.66868	-2.32303	-1.28469	2.24147	1.87786	-7.18034	-7.15529	-0.686662	0.784413	-0.589958	-1.64518	-9.85685	-0.258423	-5.76058	-1.57072	-9.82944	-3.82367	-2.01299	0.55136
b0655	gltI GltIJKL glutamate ABC transporter	-0.839181	0.960072	0.601003	0.118617	0.174349	0.804855	-0.559151	1.03393	1.3406	0.176709	-0.178732	0.410748	0.150437	0.654038	0.576288	0.0701873	1.40228	1.16583	0.492519	3.68722	-0.737675	0.217527	0.714916	0.299619	-0.256646	0.644322	0.469546	0.235106	0.100093	0.0133773	-0.156097	-0.334545	-0.454965	-0.851733	0.482218	-0.546942	-1.46708	1.10537	0.950693	-0.125219	-0.132852	0.668587	1.16114	0.873093
b0656	insH-3 IS5 transposase and trans-activator	0.57759	0.326592	-0.48128	-1.49531	-2.02073	-1.44043	0.447032	-2.32395	-4.09548	-3.83537	-1.74285	-0.125696	-1.2727	2.33329	1.49661	-0.0286154	2.4947	1.78413	0.909536	-0.0933522	1.84104	-0.522396	0.671957	0.202575	-0.259924	0.815342	0.878306	-1.48591	1.37869	-0.163001	-0.0383761	-0.634359	-1.54112	-0.803257	-1.40732	-0.551986	-0.135837	-0.399443	0.865539	-0.649875	0.526114	-0.230249	-0.431452	1.29025
b0657	lnt apolipoprotein N-acyltransferase	-3.4142	0.706753	1.27364	1.91049	1.7246	2.78715	1.76918	2.35842	1.13446	2.0657	1.44003	2.19814	1.12068	2.29696	2.40711	1.34518	3.60461	3.62366	1.77651	0.362316	0.217055	2.4991	3.05918	2.69398	2.95015	1.58538	1.54586	1.23095	1.87148	2.12504	0.938067	0.667153	0.452233	2.5604	0.734684	1.53014	0.442611	2.21581	2.35616	2.82378	0.456106	3.02811	1.51394	1.08486
b0658	ybeX predicted ion transport protein	-2.08501	1.22034	1.04593	1.96822	1.36154	2.03419	0.814442	0.0723719	0.873277	2.11738	2.17053	0.605027	1.65492	1.50668	1.35865	1.17455	0.580787	0.469801	2.74333	-0.0627248	-0.986288	0.815994	1.76409	2.19147	1.49778	1.60211	1.59508	0.136453	0.415434	1.60147	-0.285885	LQ	1.39679	2.13959	-0.358334	1.59182	1.65395	1.39764	1.00917	1.56059	-1.1539	1.85815	0.266711	-0.74327
b0659	ybeY conserved protein	-1.54949	1.06729	1.4634	2.09372	1.13508	0.68035	0.196436	0.31907	0.23882	1.45169	1.21726	0.357588	-0.211185	0.352853	0.633583	0.0350414	-0.366595	0.198482	1.45978	3.18343	-0.677233	0.0212663	1.40058	1.0631	1.02911	0.934942	1.13866	0.457092	0.388325	0.497213	-0.397205	-0.350873	1.04987	1.42545	0.0823246	0.154182	-0.132927	0.723386	-0.172049	0.770819	-0.328849	-0.294405	-0.028782	0.245452
b0660	ybeZ predicted protein with nucleoside triphosphate hydrolase domain	-0.62408	0.302168	6.99253	7.60581	-0.232288	0.54757	2.13988	-0.948036	-3.54364	3.81245	-3.83826	-3.94728	-1.59668	1.51588	1.26052	-0.663446	-4.16775	-4.52616	-1.17958	5.87605	-4.9986	-0.660084	1.82756	1.33056	1.69325	1.3762	1.51313	-1.87515	-2.605	-2.88128	-6.48898	-7.06274	-2.29817	0.144247	-6.11047	1.98034	-1.97149	0.862302	1.82658	-3.06362	-8.18968	-1.92738	-4.95407	-1.34997
b0661	miaB isopentenyl-adenosine A37 tRNA methylthiolase MiaB	-0.122226	0.445894	0.553461	LQ	-0.358839	LQ	0.702179	1.44314	-0.945371	1.34805	-0.0183461	0.704766	0.846643	0.498495	-0.220196	-1.1209	0.0304875	0.461654	0.681001	-0.598857	-1.29577	-0.736251	1.22557	LQ	1.00564	-0.117025	-0.364871	-1.25754	1.72156	0.547564	-2.86398	-2.77803	-0.263211	-0.681176	-1.01232	-0.0789341	-2.66254	1.19655	-0.38771	1.24988	LQ	0.797427	-0.331823	-0.402784
b0662	ubiF 2-octaprenyl-3-methyl-6-methoxy-1,4-benzoquinone hydroxylase	-0.976298	0.355449	9.7943	11.6253	7.95831	6.38797	12.5128	13.6368	6.50995	9.15745	0.453826	1.38673	0.415937	0.251677	0.619993	0.231776	0.156867	1.04221	2.14461	-1.11815	-0.867421	1.26544	1.99366	0.690393	1.41776	0.168628	0.521581	-0.860429	1.67397	2.15068	-1.59116	-1.20225	-0.918861	0.108386	-0.336575	0.879583	-1.41741	2.12537	-0.592606	1.61241	-0.997627	0.0422844	0.0725635	0.420664
b0667	b0667	-0.245604	0.442767	-0.273657	0.228048	0.137774	-0.111864	0.164631	LQ	0.702826	1.26123	-0.123509	1.81449	-0.151172	-0.408557	0.521108	-0.23748	1.52639	1.28735	1.12202	-0.431983	0.31843	-0.142406	0.874653	-0.0339093	1.12282	-0.170035	0.235172	-0.348829	1.73799	1.69869	-1.07927	LQ	-0.662959	0.0993738	-1.00806	-0.0847529	-0.00781081	2.28988	LQ	1.20953	-0.560093	-0.425432	-0.0593851	-0.255783
b0669	b0669	-0.234563	0.385221	-0.219956	LQ	0.13787	LQ	-0.0313973	LQ	1.18278	LQ	-0.00835306	2.16433	0.0142832	0.343099	0.483771	-0.3059	2.25405	1.29618	1.36116	-0.327126	0.0874133	LQ	1.12841	LQ	1.38665	0.000158851	LQ	-0.215116	2.06102	1.91948	-0.858233	LQ	-0.416515	0.0842592	-0.842883	LQ	LQ	2.69775	LQ	1.35808	-0.709339	-0.228686	LQ	-0.174797
b0671	b0671	-0.87381	0.485233	0.244625	1.64846	0.750453	1.51289	1.01802	1.3596	1.42827	2.11439	0.204323	2.31745	0.154619	0.880178	1.45896	0.172584	0.954189	1.44512	1.7437	2.8061	0.458006	0.978641	1.7319	0.839555	1.57797	0.391787	1.31048	0.264254	2.13531	2.09072	-0.242247	LQ	0.0314886	0.891288	-0.452195	1.48819	0.623371	2.6712	-0.101857	1.96904	0.346149	-0.0610402	1.02365	0.717043
b0674	asnB asparagine synthetase B	-0.0983555	0.710171	0.686721	-0.333566	1.1728	1.01675	-0.601031	1.14099	0.715063	0.361056	0.475389	-0.344807	0.701663	0.120127	-0.222137	0.121172	-1.00027	-1.11029	-0.158096	-1.38301	-1.24299	0.15654	1.2151	0.0260788	-0.179523	0.572684	0.578024	0.881897	-0.296152	1.55046	-3.05178	-3.31817	0.252333	-0.253217	-1.68595	0.121609	1.99603	0.94404	-0.609325	0.246015	-2.06627	0.646	0.126354	-0.0990735
b0675	nagD ribonucleotide monophosphatase	-0.546078	0.66148	1.49278	-0.478536	0.116659	1.25472	-2.90369	-0.280889	0.413982	-0.449311	0.45644	-0.817832	-0.010574	-0.69774	-0.742131	0.657746	0.782684	1.07466	0.194064	2.61938	3.26932	-1.9074	0.684728	0.271217	-0.834817	0.117615	0.31057	-0.243672	1.87039	1.14207	-2.42304	-2.51291	1.20939	-0.0232255	-2.60799	1.12563	1.51039	0.229602	0.697541	1.03833	-3.23656	0.668037	-1.67467	1.69764
b0676	nagC NagC transcriptional dual regulator	-0.744837	0.582285	-1.98532	-2.82013	-0.148172	-1.32879	-3.03947	-1.55996	0.0379866	-3.47194	2.13906	1.04018	0.869113	-0.972682	-0.782077	2.86743	1.42879	1.9749	1.20284	2.16557	-0.240959	0.935674	1.04741	0.708899	0.628576	1.50068	1.60927	1.28498	0.663447	0.167738	-5.96838	-6.1432	-0.910017	1.32872	1.8408	1.02964	-2.22614	0.667229	0.32235	0.974989	-5.15279	0.0167478	0.0302743	5.28423
b0677	nagA N-acetylglucosamine-6-phosphate deacetylase	-0.674582	0.348611	-5.05948	-2.22109	-1.72499	0.361657	-5.77528	-1.25469	-1.13871	1.33463	3.13055	3.36797	0.721409	1.65199	1.44099	3.28595	2.13884	2.43993	2.64053	5.15341	6.2832	0.973359	2.24982	2.2773	2.96693	1.06804	1.49843	1.46896	2.2787	1.47978	-4.34288	-4.48166	-0.0953853	2.72916	-1.98632	1.89558	-3.76352	2.65818	0.653253	2.60918	-4.341	0.909239	2.31045	8.73794
b0678	nagB glucosamine-6-phosphate deaminase	0.580213	0.556997	-0.496238	-3.03538	-1.52086	0.183562	-6.06494	-0.816406	-1.13366	-2.30441	-1.57393	-0.929561	0.889212	-1.41318	-1.45929	-0.597196	1.52357	2.32198	-0.436811	-1.86477	3.1201	0.479832	-0.183396	-0.0205986	-0.497275	-0.780424	-0.856809	1.18535	0.753216	-0.906552	-4.68425	-4.61401	0.522667	-1.62972	1.55279	1.50088	-3.61045	-0.839915	-0.483567	-0.810722	-4.53275	0.124867	0.744242	1.61901
b0679	nagE N-acetylglucosamine PTS permease	-0.241997	0.260668	2.33135	2.67861	-0.818385	1.64268	0.37302	-2.78179	-2.59129	-1.49041	-0.296372	2.60759	0.289846	-0.315426	-0.112385	-1.48608	-6.67483	-5.92739	-1.38167	-12.2887	-10.8549	-3.15905	1.90512	-3.54172	-0.81266	-1.23526	-1.71213	-1.5493	4.97885	-3.04468	3.18018	3.91731	-5.17662	1.03251	-6.59397	-0.36298	-8.41988	-0.434102	3.3879	0.136524	-12.3572	-1.12316	-0.0149238	-9.23993
b0680	glnS glutaminyl-tRNA synthetase	-1.90758	0.427009	-0.638035	1.00055	1.02671	2.12716	0.490147	1.44855	0.0554638	3.34505	0.582586	1.52304	1.47584	0.46904	0.951667	-0.933454	0.495118	0.585812	0.887139	-0.459118	-0.870382	2.18215	1.73085	2.95878	1.13329	0.889184	0.893787	0.867348	1.46445	1.34759	-0.869958	-0.198067	-0.0137256	1.09442	-1.27294	1.85201	-0.443845	2.13976	-0.754447	0.896994	-0.494225	-0.645516	-0.0732439	-1.0054
b0681	ybfM predicted outer membrane porin	0.919855	0.57063	-1.76246	-1.58465	-1.94821	-1.0993	-3.93364	-2.1369	-1.61495	-3.05219	-1.33921	-3.46774	-0.848694	-2.26912	-2.2217	-1.18944	0.876532	0.544334	-1.40113	-0.853815	-1.54757	-1.89065	-1.40959	-3.3411	-2.50322	-1.99561	-2.16911	-1.4913	-1.28279	-0.861168	-0.240235	-0.0481149	-2.12456	-3.35653	-2.0162	0.0629782	-1.60922	-1.47366	-3.90973	-1.03108	-5.43048	-2.38421	-2.40137	-0.455685
b0682	ybfN predicted lipoprotein	0.176137	0.295022	-2.40514	LQ	-0.386406	LQ	-2.3066	LQ	1.10765	0.15812	0.535984	2.27517	0.226016	-0.213418	-0.377874	-1.9087	-1.67102	-0.71195	0.948926	-0.0810386	1.57331	-1.37159	0.388617	LQ	0.373406	-1.80463	-0.964441	-1.32285	1.45346	1.20128	-0.200648	LQ	-1.22339	-0.843854	-2.54139	-1.29315	-2.73719	1.91086	-2.39253	1.35999	-2.60171	-2.23588	-0.480754	-1.16765
b0683	fur Fur-Fe+2 transcriptional dual regulator	-0.263603	0.260501	0.17211	LQ	4.27419	LQ	1.25783	LQ	5.40148	4.52609	1.52384	0.644462	6.09065	2.16113	1.45241	-1.02349	-3.09155	-2.20965	-0.661281	-4.08298	-1.78054	-5.06982	-0.621475	-3.74619	-2.06227	-3.26999	-2.04346	5.14548	0.60833	7.10477	-4.12719	LQ	1.18908	-1.90971	-3.03223	-0.12329	-6.85194	0.82087	LQ	-0.516797	5.23234	1.0238	2.6428	1.53907
b0684	fldA oxidized flavodoxin 1	-0.0160883	0.682755	-1.92244	-1.68774	-0.680717	-0.863712	-1.49327	-0.347326	0.560304	0.417943	-0.597464	-0.956517	-0.132736	-0.761848	-0.585778	-1.49656	-2.67604	-2.24463	-0.488282	-2.88097	0.520375	-2.73985	-1.51228	-2.48575	-2.01466	-1.08761	-1.1225	-0.976521	-1.15298	-1.41328	-2.32204	LQ	-1.36077	-2.60993	-0.000573689	-1.83007	-1.63459	-1.41655	-3.03141	-1.47981	-2.12695	-1.96367	-2.56151	-1.50123
b0685	ybfE LexA-regulated protein	-0.226267	0.352102	-0.574226	-2.14933	-0.630581	0.296062	-2.50815	-1.28896	-2.17502	-1.0884	3.38847	-0.439737	2.19279	1.44893	1.85984	-2.14341	2.81798	2.41051	2.66509	-3.57491	-0.456444	-3.27802	0.603182	1.67942	-1.30622	-3.39376	-2.13137	-2.0205	-0.840348	-0.766124	2.62643	2.83809	-2.63741	-2.60216	-5.70907	0.451889	-3.68913	-0.520664	-0.46614	2.58709	-3.44675	-2.44789	-2.68393	1.31595
b0686	ybfF esterase	-0.5407	0.430539	0.697151	-0.133543	-0.241347	2.18565	-0.907388	LQ	-0.42784	-1.3718	1.11039	2.22033	-0.0168481	0.843938	1.14529	-1.59529	-2.99659	-1.41272	0.879807	-0.133029	-3.71829	-2.40381	1.21479	0.707844	0.81566	-0.383524	-0.238063	-0.0628894	-0.960612	0.622487	-3.2692	-1.88862	-1.1259	-1.06774	-4.23425	-1.03649	-2.0362	1.86894	0.94241	2.30191	-2.58653	1.29609	-1.34682	-2.02505
b0687	seqA SeqA, negative modulator of initiation of replication	-1.09021	0.655008	-0.697692	0.242345	-0.473188	0.466799	-1.04915	0.224073	-0.21957	-0.0435377	0.0725205	-0.217084	1.05782	1.23004	1.15356	0.0495867	-1.0354	-0.513134	-0.318329	-1.88914	LQ	-1.99439	0.144811	-0.981876	-0.629661	-2.07012	-1.20992	-1.19643	-0.403224	-0.387267	-2.69483	-1.93335	-1.14569	-0.993131	-2.58974	-0.330345	-1.86554	0.641706	-1.57145	-0.112258	-2.0111	0.364517	2.89574	-0.983505
b0688	pgm phosphoglucomutase	-1.07017	0.654492	0.251612	-1.25319	-0.592676	0.13707	-1.33125	LQ	-0.725847	0.327112	1.47598	1.11114	2.73741	2.7585	2.55215	-1.05289	-0.997524	-0.930993	-0.329474	-2.87739	-2.23148	-2.9563	0.989465	0.785935	-1.79734	-1.41993	-0.557968	0.908853	-1.60783	-0.717021	-2.64832	-2.10457	-0.878614	-2.48182	-2.17769	-1.2299	-1.66419	-1.14787	-0.239042	-1.51736	0.201392	1.6127	0.247705	-0.606557
b0690	ybfG	2.74699	0.19138	-0.839058	LQ	-9.95783	-8.64989	-11.0011	LQ	-9.60208	-7.68031	-3.54776	-7.01569	-2.14569	-5.2362	-6.94633	-2.79649	-4.95554	-7.71826	-1.69336	-8.1004	-7.68958	-6.41724	-6.04232	-5.89533	-6.09972	-6.96924	-6.94383	-8.97675	-4.84496	-4.49737	-7.22345	-6.11978	-9.14026	-7.43178	-11.4391	-5.42678	-7.79272	-4.8075	LQ	-7.61763	LQ	-1.51757	-5.47614	-3.34191
b0691	ybfH	2.56523	0.294825	-1.92138	LQ	-4.32438	-3.81266	-6.31152	LQ	-4.26456	-5.15213	0.899844	-6.22463	0.48553	-1.80403	-2.36753	-0.466637	-4.70302	-5.12961	-0.721976	-0.506864	0.62869	-3.42157	-1.4606	-2.3204	-2.45076	-2.08539	-1.0991	1.1871	-3.12892	-0.532766	-3.55106	LQ	-1.56283	-2.82638	-6.49571	-1.2212	-2.09933	-0.0841408	-0.545062	-3.25404	2.92874	2.84476	-2.14287	2.61927
b0692	potE putrescine/proton symporter: putrescine/ornithine antiporter	0.795179	0.400469	1.63825	-0.120289	-2.63359	1.35195	1.50954	0.375213	-2.24562	-0.92169	1.29529	-0.224979	1.03151	0.135882	1.16582	0.905465	-2.39678	-2.19847	0.801797	3.71615	-0.621902	-3.07672	1.29888	2.1961	-0.703177	-0.588036	-0.193639	0.117468	-1.20005	0.0654255	-3.45676	-3.70878	-1.42768	-0.835027	-0.401249	0.353172	-0.532688	1.46275	-2.88263	0.567626	-4.30142	2.61396	-2.1076	0.0230133
b0693	speF ornithine decarboxylase, degradative	-0.110613	0.62713	1.29523	0.32575	0.427153	0.76753	-1.01133	1.01856	-0.710183	-2.40921	0.920585	-0.464184	1.26425	1.4391	1.24379	1.22387	0.974612	0.794814	0.113755	2.41462	0.751635	0.386493	0.98317	0.73504	0.681846	1.50869	1.66192	0.543637	1.09488	0.539814	0.875815	1.58369	1.13166	0.934084	1.88066	0.360224	-0.378072	-0.474869	1.24028	-0.439468	0.640373	1.86212	1.81879	0.362099
b0694	kdpE KdpE-Phosphorylated transcriptional activator	-0.224325	0.390091	1.00453	-0.119923	-2.1465	1.19185	-2.18538	0.372522	-4.0293	-1.48145	1.86895	-0.0387137	1.9392	0.900258	1.31618	0.38285	-0.817637	-0.0919798	1.02436	-2.17192	5.0618	-1.54641	1.00219	-0.943	0.851086	0.0809917	0.807692	2.03588	1.6555	1.56486	1.68418	2.58285	-1.43325	-1.58788	-1.63447	-0.653846	0.55793	1.14161	-1.20641	-1.01312	5.49237	-0.286695	1.37311	3.17098
b0695	kdpD KdpD-P his	-0.851622	0.612324	-0.132571	LQ	-0.296329	LQ	-1.37211	LQ	-3.21418	0.336629	0.105819	0.995648	0.587536	0.30459	LQ	-0.216146	-1.03529	LQ	0.683767	-0.19157	0.712292	0.271839	1.13389	1.29737	1.29967	0.396949	0.546564	0.94002	2.3077	1.35566	-0.626947	0.343824	-0.771077	0.783996	1.3536	-0.111008	0.684943	0.9417	-1.92314	0.417623	3.49833	-0.28716	-1.10741	1.7969
b0696	kdpC potassium ion P-type ATPase transporter	-0.588594	0.413215	1.56984	-0.674821	0.962786	0.96135	-3.77251	-3.39868	0.40354	1.22782	0.400659	3.90941	2.43103	1.08745	0.926425	1.19607	-2.40681	-2.43613	-1.69887	-5.15511	-3.98419	1.44937	3.30781	0.967874	0.7302	1.51951	1.9776	-2.51399	-0.00803047	1.94394	-1.47608	-1.86126	-2.05265	4.40795	-4.66562	-0.196366	0.969058	1.92856	-3.58912	1.54057	-0.460388	2.32658	-3.47377	-0.102985
b0697	kdpB potassium ion P-type ATPase transporter	-0.62946	0.665142	1.48837	-0.569999	-0.0544562	0.774775	1.40594	-2.02965	-1.01579	0.00916286	0.564635	1.7133	1.4942	1.00464	0.988826	-0.781653	0.284928	-0.0774619	0.576867	-1.27472	1.30632	-0.0102214	1.01022	0.185347	0.117969	0.47224	0.362045	-0.713704	-0.905284	1.53067	1.66927	1.96908	-0.646854	0.602125	-3.35613	-0.423244	-0.516835	1.03363	1.58018	0.131029	-3.95062	1.44996	-3.11928	-1.08819
b0698	kdpA potassium ion P-type ATPase transporter	-0.165998	0.558376	0.481855	-0.0339618	-0.519819	-0.256558	-1.08044	-0.671436	-4.49216	1.11813	0.421944	1.57464	0.184508	-1.37735	-1.45963	1.12649	-0.60867	-1.05251	-0.82288	-0.248039	2.18238	-2.86814	0.438484	0.670025	1.61259	-0.398386	-0.474884	0.0663224	1.85189	-0.500188	0.334526	0.0392932	2.2515	0.887694	0.734544	0.196164	-0.692499	0.56681	-0.486829	0.0618241	-6.36453	-1.17768	-2.50405	-3.74622
b0699	ybfA predicted protein	0.734421	0.5721	-2.58911	LQ	-2.85091	-1.15734	-2.57499	LQ	-1.16267	-0.633816	-0.216427	-0.301169	-1.29346	-1.57756	LQ	-1.861	-2.59017	-2.45643	-1.49717	-2.72161	-2.60384	-2.51692	-1.51559	-0.278074	-1.34219	-1.69938	-1.33119	-1.80853	-0.699937	-0.403883	-2.87597	-2.26974	-1.98059	-1.9823	-3.18109	-1.66418	-2.75973	-0.268926	-2.5166	-1.67952	-2.97546	-1.18373	-2.27288	-1.90459
b0701	rhsC_2 RhsC element protein	1.74662	0.558029	-2.80312	-1.77631	-1.38037	-0.971499	-3.11764	-0.551888	-1.01007	-3.37239	-0.354097	-2.79763	0.207121	-0.844679	-1.04911	-1.67914	0.179034	0.173511	-0.674996	-3.03702	-0.643725	-0.536876	-0.505128	-0.612496	-1.20171	-0.629294	-1.00772	0.880595	-1.09505	-0.94705	1.45697	1.28345	-0.815274	-1.80556	-0.101673	-0.0756497	-0.62655	-1.58173	-0.655249	-0.396592	-3.93109	-0.69267	-0.62479	0.120353
b0703	ybfO putative rhs protein	0.966343	0.402626	0.649112	-0.593623	-1.25617	0.339043	1.4332	0.802331	-2.80078	-0.0228049	0.384832	-2.41071	0.88006	1.60364	1.3034	1.46942	-0.451937	0.404365	2.64741	3.30816	1.48689	0.828734	1.94212	1.42514	1.50474	0.919868	2.33746	1.04862	1.25919	1.56037	1.31323	2.39778	-0.725612	-0.0890564	-0.551009	1.86038	2.17961	2.69318	2.10027	0.516921	0.901322	2.30786	1.30213	1.95391
b0704	ybfC predicted protein	0.931217	1.03161	-1.95017	LQ	-0.221128	-1.03305	-1.52771	0.420345	-1.27075	-1.36924	-0.602952	-1.0927	-0.702781	0.0553219	0.0328909	-0.632266	-0.332776	-0.401962	-1.16431	1.77004	-0.681486	1.53615	-1.2777	0.863896	-1.11709	0.584976	0.705956	0.409119	-0.726147	-1.07863	1.73394	1.70054	1.41973	1.04759	0.842294	0.0248053	0.774369	-0.737347	1.31932	-1.13096	0.361632	-1.76091	2.01057	-1.59523
b0705	ybfL predicted transposase; receptor protein	2.19295	0.598562	-3.26002	LQ	-1.25362	LQ	-2.42098	LQ	-2.05639	LQ	-1.45386	-2.93007	-0.248517	-0.323152	-0.860742	-1.19887	1.32524	0.469609	-2.25691	-1.07353	-0.181625	0.935565	-1.70395	0.456738	-2.342	0.34416	-0.873031	2.38558	-1.01209	-2.59592	2.98856	2.09866	-0.34421	0.15965	1.4889	0.189699	LQ	-2.28041	0.190868	-1.54596	2.67478	-2.06474	2.01112	-1.7215
b0706	ybfD putative DNA ligase	2.169	0.810027	-2.89023	-2.32136	-1.1832	-2.58116	-1.93841	-1.99288	-1.81715	-2.96354	-1.22549	-1.99465	-0.836822	-1.11326	-1.71777	-1.10221	-0.0900886	-0.802225	-2.20846	-1.11475	-0.49404	-1.03208	-1.49239	-1.79019	-1.45305	-0.205304	-1.33374	0.703633	-0.863588	-2.4267	0.787236	-0.847641	-0.0685968	-0.373882	0.972863	-1.4055	-1.39175	-2.1556	-1.48128	-1.33426	-0.405803	-1.37837	0.995886	-1.24491
b0707	ybgA conserved protein	1.05453	0.421859	-3.30281	-1.00478	0.496709	-2.6919	-3.80913	-2.27425	-4.57781	-4.61692	-0.0583874	-0.641301	0.569379	-0.303283	-0.464719	-1.54777	0.829541	-0.0435868	-3.43191	-1.42482	-1.92888	-0.789181	-1.04656	0.85312	-0.584595	-1.04111	-0.365643	0.507479	-0.485313	2.47708	-1.29101	-0.543251	1.0757	1.87004	3.78856	0.570997	-0.656795	0.348678	3.20992	-0.0187154	-3.09707	-2.89656	2.52783	-2.69445
b0708	phr deoxyribodipyrimidine photolyase (photoreactivation)	-0.0788896	0.987044	-0.0843807	-0.676865	-0.191576	-0.854291	-1.28124	-0.832081	-0.612206	-1.46657	-0.4871	0.440797	-0.30013	-0.901405	-0.706259	-1.46546	-0.573217	-0.193637	-0.45214	-1.84653	-0.319208	-1.40293	0.354348	-1.38949	-0.281619	-0.551362	-0.40927	-0.0801677	-0.28209	-1.05322	-1.11413	-0.668944	-0.668349	-0.746707	0.699491	-1.06384	-0.634817	0.0886944	-2.24146	-0.330674	-0.443245	-0.901417	0.2942	0.333317
b0709	ybgH YbgH peptide POT Transporter	0.918942	1.11744	0.465245	0.271946	0.360018	-1.18198	-2.107	-1.44225	-2.78476	-0.988975	-0.28505	-2.46144	-0.489615	-0.315694	-0.070576	-1.20209	0.0588574	0.566924	0.0849359	-3.72414	0.0539004	0.925281	-0.558243	0.468467	-0.0902934	-0.371088	0.093834	-0.855039	0.538485	-0.05418	0.719359	1.10588	0.74447	0.605288	0.684753	0.0984671	-1.53739	-0.12407	0.0868657	-0.315492	-2.63821	-0.915458	1.21617	-0.353725
b0710	ybgI conserved metal-binding protein	-0.495186	0.659067	-0.312759	-0.082083	-1.05972	0.620952	-0.890551	0.270092	0.691848	-0.69049	0.9131	0.150354	0.565036	0.0781024	0.524188	0.214726	-1.18446	-0.278353	-0.3673	-1.40415	-1.68055	-0.437675	0.545185	1.02182	0.35211	0.0994904	0.725023	-0.102873	2.17717	-0.532607	-0.587377	-0.0821173	-0.0475706	-0.632391	-1.84015	-0.696788	1.53898	-0.345267	-1.5156	0.216592	-2.48297	1.09464	-0.108888	1.84841
b0711	ybgJ putative carboxylase	-0.656089	0.754496	-1.86409	0.971517	-1.19657	0.00129402	-1.23796	-0.859386	-1.84239	0.401037	0.363748	-0.628519	0.367704	-0.356004	-0.153409	-1.06031	0.215861	0.475178	0.515107	-3.59015	-0.825285	-0.245208	-0.0257511	0.351249	-0.329108	-0.720459	-0.523977	-1.56389	1.07716	0.509936	1.4262	1.73045	-2.00745	-2.12786	-2.49361	-1.20764	-1.28869	-0.671626	-0.0648637	0.215022	-2.76094	-0.170976	-1.88291	-0.718401
b0712	ybgK putative carboxylase	-0.996407	0.826841	0.166101	-0.781826	-1.07544	-0.189402	1.44165	-0.769205	-1.89406	0.531353	0.7624	2.04774	-0.116439	0.587806	0.977943	0.281399	-0.794939	-0.309723	1.03478	-2.20025	-1.88186	-0.767135	1.28776	0.408686	0.707797	-0.515649	-0.00170644	0.250477	0.284019	1.18146	-1.59974	-1.36869	0.462008	-1.19768	1.10138	0.34534	0.342195	1.00659	-1.88817	0.755385	-1.6765	1.75804	-0.793597	1.59058
b0713	ybgL predicted lactam utilization protein	-0.95497	0.742676	0.896296	0.607306	1.02137	0.298993	0.571113	-0.248508	-0.168409	1.03785	1.64564	2.19189	0.588512	1.37068	1.25776	0.655272	-0.680354	-0.311636	-0.578508	-1.15535	1.28844	-1.19545	1.20148	0.825497	1.98442	-0.248453	-0.0197977	1.52567	0.718189	1.12317	-3.06935	-2.82537	1.36074	0.0149679	2.56563	0.894529	-1.69486	0.767582	1.16774	1.88868	-2.4524	0.0662329	1.53446	1.51284
b0714	nei endonuclease VIII	-0.887799	0.386272	3.5077	0.81289	2.4383	0.497914	3.41928	-2.16499	1.3229	-2.43205	2.62829	-1.40081	-0.496402	0.803755	0.616915	1.39211	2.51869	2.16807	1.24632	-3.27605	7.47011	2.61111	1.62915	2.68716	1.95876	-0.0525114	-0.199821	0.982527	-1.58728	-2.19064	-5.74999	-3.81251	3.78709	2.80603	0.486377	-0.676139	3.68305	1.75602	-0.620639	2.29871	-1.89194	3.21301	-3.80364	-0.526646
b0715	abrB predicted regulator	0.0379664	0.531538	-1.76259	-0.843607	-1.0478	-1.38681	-3.83551	-1.38908	-3.07761	-2.47735	0.139724	-2.9527	0.821392	-1.42123	-1.77259	-1.29434	-1.0835	-0.705784	-2.4738	-3.1537	-2.05642	-4.02351	-0.552345	-1.40728	-0.731814	-1.44209	-0.97339	-1.14648	-3.58921	-4.07557	-3.92516	-2.72665	-2.47834	-0.781461	-4.39465	-1.0033	-3.90522	-0.164567	-4.09354	-0.55411	1.04458	-0.109054	-2.91934	-4.23355
b0716	ybgO predicted fimbrial-like adhesin protein	1.80981	0.400322	-2.80446	-0.587729	LQ	-0.806382	-2.29554	0.367352	LQ	-5.2639	-1.15887	0.25239	0.140055	-1.79808	-1.5507	-0.811099	-0.327791	-0.192636	LQ	-1.92265	-3.48219	-1.97805	0.114624	1.62011	-0.0350716	-1.49299	-1.1964	1.60627	-0.709372	-2.82914	2.99885	3.63596	-1.71521	-1.01471	0.458041	1.35807	-1.87665	-2.10138	-0.109892	-0.588028	2.30962	-0.947326	2.82336	-2.25095
b0717	ybgP putative chaperone	-0.119007	0.449532	0.196721	0.525588	-0.0229007	0.612643	-2.30481	-0.0201694	0.185673	0.329012	-0.535848	0.362856	1.77834	1.86792	1.62862	0.313611	0.879166	0.824055	-1.19067	-2.16511	1.13439	2.42618	0.21396	1.03175	0.126466	0.971586	0.913601	0.628642	1.22016	1.86812	-2.80173	-2.21817	0.0717558	-1.98569	-0.34402	0.682149	2.38787	0.125789	1.0575	0.825988	-2.73019	1.89196	0.434816	-0.447832
b0718	ybgQ predicted outer membrane protein	1.12208	0.335867	-1.81075	-2.18631	-1.83507	0.451329	-8.62308	-0.655153	-3.20328	-4.1279	-0.584932	-0.462613	-0.814531	0.545356	0.813767	-0.648632	0.841249	1.31461	-1.29523	0.792966	1.54466	-1.41282	0.212526	0.243185	-0.0238982	0.672745	1.07836	-0.408923	-0.207251	-1.28772	-0.891415	-0.397452	-0.177633	-2.19053	-1.20543	-0.16574	2.83505	-0.155361	0.518219	-1.05729	-2.05382	0.407337	-3.49219	-1.09218
b0719	ybgD predicted fimbrial-like adhesin protein	2.46101	0.598617	-0.320301	-1.3859	-1.14389	-1.31797	0.921456	LQ	-2.55216	-3.17264	0.400054	-0.15034	0.00928687	-0.975471	-1.46653	0.238366	-0.483114	-0.714546	-0.559123	-2.46166	-0.403711	-0.0257956	-0.585425	-0.502648	0.130472	0.03337	-0.142928	0.190902	-0.871043	-0.329846	0.852107	0.691767	0.267225	-1.86038	-0.305066	-0.41464	0.402155	-1.21801	-1.6609	-0.799838	-0.425157	0.826382	0.282803	0.593303
b0720	gltA citrate synthase monomer	0.139095	0.390386	1.60932	2.57457	3.87453	3.15544	2.29211	-2.36401	0.872814	-1.48852	1.46955	2.31793	2.13957	2.79167	2.66583	3.21107	4.9132	5.71651	0.119085	3.74448	-3.73927	1.75543	-0.382241	-0.594302	0.692227	1.78544	2.65201	2.76379	1.09833	3.4652	2.30314	2.92847	2.24874	-0.0917089	2.2401	1.246	1.4066	-0.853568	0.734248	-1.82639	2.57154	-1.37315	4.51065	3.63317
b0721	sdhC succinate dehydrogenase membrane protein	-0.155729	1.38853	-0.689334	1.21865	1.84168	2.15303	-0.559463	0.230817	2.07132	LQ	0.030667	1.22815	-0.971277	-0.644665	-0.856104	-0.479189	-0.543055	-0.711872	-0.578455	-0.899892	-1.36063	-0.876695	0.980302	0.25642	0.179571	-0.682343	-0.628791	0.719214	2.05949	1.26112	-0.484789	LQ	-0.142575	0.881045	-0.00765024	-0.0219936	-0.389228	0.369432	-1.18761	1.53175	-1.28717	0.259001	-1.14957	-0.505498
b0722	sdhD succinate dehydrogenase membrane protein	-0.0363081	1.60206	-0.246858	0.0122622	1.01373	LQ	-0.464779	-0.674457	0.116514	LQ	-0.224119	0.194091	-0.875441	-0.709353	-0.668723	-0.604205	-0.502183	-0.615111	-0.427442	-1.0958	-1.01716	-1.18665	-0.0997381	0.0740631	0.0382625	-0.622895	-0.663326	-0.830231	0.0769717	-0.385248	-0.769816	LQ	-0.635706	0.0152214	-1.12761	-0.560584	0.165815	0.978935	-1.24593	0.538176	-1.27335	-0.464882	-1.16818	-0.451082
b0723	sdhA succinate dehydrogenase flavoprotein	-2.10103	0.769641	3.62642	2.60814	4.88713	5.08168	4.13266	0.903807	3.54158	5.13581	1.14275	0.494022	0.792187	0.107386	-0.0210248	1.72192	0.536347	0.206307	1.56145	-1.95017	-1.4153	-1.16831	2.01699	3.01294	1.8362	-0.464417	-0.321588	0.235813	0.572054	1.40432	-1.19787	-1.20232	0.565752	2.60751	-1.51212	1.42634	2.51228	1.47786	-2.1109	1.26383	-1.81002	2.75333	-0.0283769	2.31906
b0724	sdhB succinate dehydrogenase iron-sulfur protein	-1.9242	0.871363	2.7974	1.67872	4.19762	4.28161	3.37775	1.3782	4.6887	3.94831	0.40512	0.758906	0.131994	0.279854	0.239853	-0.133985	0.878352	0.894765	1.7651	-0.707816	-1.03553	-0.253188	1.77723	1.10942	0.41112	0.613119	0.698393	0.755768	0.588428	3.85039	-1.11329	-1.08947	-0.756208	-0.106485	-0.587571	1.26957	0.68207	2.17261	-0.864704	2.39913	-0.152652	1.32303	1.36185	-0.464853
b0725	b0725	-1.0175	0.682896	3.23736	LQ	2.03089	1.95404	0.569531	LQ	4.39874	2.8905	0.360687	1.60166	0.107615	0.280607	0.485534	2.90123	0.605939	0.505899	1.15477	-0.070115	-0.502215	0.107332	1.62031	0.13216	1.16122	0.591541	0.39623	0.660878	1.49276	1.58845	0.000139567	-0.220997	-0.294303	0.470251	-0.180091	1.15374	0.00261161	1.83444	-0.095404	1.33034	0.0933895	-0.137374	0.401902	0.331688
b0727	sucB SucB-lipoate	-2.94576	0.787556	1.56814	0.268314	2.19921	2.3446	0.249621	1.02945	2.12326	1.64007	1.3804	1.37833	0.43448	0.557739	0.137639	1.12349	1.75265	1.87175	1.02528	-0.413996	-0.48973	-0.161108	1.43173	-0.410218	1.09349	1.24416	1.21064	0.986433	1.18861	1.59255	0.619876	0.136802	-0.612479	2.59211	0.478204	1.55428	0.0422728	1.96649	-0.662043	1.41393	-0.266757	0.921452	0.0154511	-0.00175599
b0728	sucC succinyl-CoA synthetase, beta; subunit	-1.92561	0.902335	0.0921158	0.343577	0.570264	1.43815	-0.376741	0.208929	-0.238786	0.542574	0.68525	0.315432	0.763818	-0.309848	-0.186593	-0.141226	3.55326	3.52153	1.5246	-1.38999	-0.739367	-0.532038	1.1191	-0.216723	1.2215	-0.566167	-0.254789	0.257695	1.37637	1.75198	-1.17932	-1.02334	0.364708	-0.852776	0.761378	1.25269	1.40232	1.08291	-1.21228	0.636775	-1.24054	1.91867	-0.804207	-0.455033
b0729	sucD succinyl-CoA synthetase, alpha; subunit	-0.913489	0.937779	1.41416	-0.0554567	0.535097	1.58379	-1.62371	1.72454	-0.635753	0.927204	0.277295	-0.825925	0.894239	0.554189	0.137935	0.913111	-1.56682	-1.19823	2.45695	-1.69128	-0.860964	-1.29216	1.53103	-0.760664	1.16722	-0.0216191	-0.254603	1.14498	0.604183	-0.281006	0.60892	0.976999	-0.245424	-1.95666	-1.53178	-0.237612	-2.16804	1.03081	-0.615713	1.55708	-2.03595	3.02479	1.05527	-0.697798
b0730	mngR MngR-acyl-CoA	0.015968	1.20699	-2.07092	-0.450719	-0.124791	-0.769245	-2.16115	-0.672573	-1.15589	-1.22394	-1.03235	-0.345376	-0.268478	-0.53983	-0.479873	-1.36971	-1.41302	-1.71762	-0.736342	-0.746304	-2.10315	-1.71371	-1.02961	-0.412724	-1.08631	-0.797627	-0.811615	-1.27222	-0.665634	-0.480266	-1.92315	-1.50363	-1.38519	-1.78765	-1.14098	-0.844837	-2.19721	-0.208869	-2.10774	0.109729	-1.6976	-0.10524	-1.89933	-0.839712
b0731	mngA 2-O-alpha;-mannosyl-D-glycerate transporting phosphotransferase system	0.047606	0.241888	-1.14645	0.504251	-1.01115	-0.373818	0.616585	2.41396	-2.09532	-1.95199	0.238122	1.83966	-0.313699	-1.29663	-0.702119	-1.08695	-11.017	-10.2424	-0.946359	-8.16642	-0.774521	-5.86086	0.290475	2.13792	-2.55496	-0.605328	-0.305809	-1.78621	-10.8966	-5.03358	-10.878	-9.94953	-1.85072	0.178182	-2.0002	0.430047	-2.67634	0.90686	-4.09573	-2.12808	-8.10435	0.180521	-13.0697	0.842516
b0732	mngB alpha;-mannosidase	0.217164	0.440093	1.494	0.979501	1.30802	1.88764	0.137108	LQ	-0.302727	-0.456158	1.99415	2.36504	0.950872	2.62509	2.56809	1.2328	2.45728	2.91444	0.173193	-2.76252	0.377083	2.01596	1.34998	3.21338	1.46398	2.12054	2.29897	1.30167	0.547505	0.553583	2.20897	3.40769	2.10744	2.79385	1.20993	1.57542	0.313089	0.472472	5.64976	1.77309	0.429965	1.31461	2.24266	0.0347064
b0733	cydA cytochrome bd-I terminal oxidase subunit I	-1.51491	0.989742	4.0044	5.01529	2.07522	1.72126	5.34366	4.61768	-0.285275	-0.643669	-1.60171	-0.0781111	-1.63651	-0.122891	-0.475579	-1.86935	-1.22197	-1.29847	-0.899171	-2.22742	-2.23596	-1.05439	-0.681597	-1.45224	-0.741301	-0.81741	-0.650095	-1.48248	-0.796254	-0.440714	-2.02288	-2.27102	-1.13749	-1.45732	-1.52719	-1.30862	-2.11089	-0.621813	-1.53853	-0.57106	-1.97659	-2.01796	-1.29092	-1.59733
b0734	cydB cytochrome bd-I terminal oxidase subunit II	-2.03901	1.1948	3.58997	4.01097	1.33235	1.52769	5.46263	3.4598	-0.600608	2.36429	-0.469484	0.0829794	-0.823093	0.113398	-0.0736625	-0.610824	-0.433154	-0.26871	-0.0261962	-1.42292	-1.13956	-0.949836	-0.0220233	-1.01172	0.0665379	-0.629872	-0.54096	-0.795832	-0.0730994	0.168587	-1.06853	-1.50565	-0.532264	-0.723153	-1.40234	-0.632853	-1.55598	0.233699	-1.09457	0.100436	-0.759936	-1.12751	-0.518978	-0.753561
b0735	ybgE putative lipoprotein	0.459053	0.828247	-1.64033	-0.32801	-0.187332	-1.40176	-0.829913	-1.07198	-0.648909	0.717554	-0.864224	-0.620254	-1.89964	-0.625905	-0.506836	-0.74488	1.48513	1.43858	2.67248	-1.2928	0.131154	-1.12193	0.357195	-0.212556	-1.32746	-0.788094	-0.917857	-1.79793	-1.39892	-0.607492	-3.15219	-2.49854	-0.0646935	-1.34892	-0.820675	-0.267605	-1.79588	-0.0200301	-1.23716	1.44363	-1.98934	-2.65035	-0.155342	-2.39758
b0736	ybgC esterase/thioesterase	-0.414827	0.664537	-1.72185	0.317179	-0.480879	-1.08463	-0.143123	1.28445	-1.29643	-0.658412	1.09923	0.259517	-2.06382	-1.39441	-1.11463	-0.0750375	3.24733	3.39169	-0.66114	-1.52347	-1.89895	-1.59013	0.0566752	-1.2975	-0.183583	-0.303888	-0.579163	-0.417055	-0.639815	0.772247	-2.0173	-2.12511	-0.544542	-1.3792	0.687314	-0.518052	-2.21006	0.0263287	-1.81342	-0.24999	-1.32487	-0.59676	2.60342	-1.58095
b0737	tolQ The Colicin A Import System	-1.24452	0.723851	-1.46138	1.43162	LQ	-0.859995	-0.828762	0.978297	LQ	-1.35586	1.27062	-0.446156	-1.78571	-1.14104	-1.66241	-0.043435	2.79018	2.77416	-0.921607	-1.79285	-1.56333	-3.12354	-0.052799	-0.915197	-0.515711	-0.842953	-1.20564	LQ	-1.08132	-0.403886	-1.93074	-3.1395	LQ	-1.45435	LQ	-1.67844	-3.0025	-0.451272	-3.16467	-0.0235983	-2.45195	0.643576	2.46218	-1.23508
b0738	tolR The Colicin A Import System	0.233996	0.456077	-3.75015	-3.58823	-4.26351	-4.82152	-4.09444	-5.80106	-4.6958	-3.89923	-3.74063	-2.89179	-4.89369	-4.30872	-4.5426	-3.21464	-4.26379	LQ	-3.64672	-3.19982	-4.40531	-6.22907	-2.3269	-3.66449	-1.85686	-3.79987	-4.5371	-5.72782	-2.56279	-3.32357	-5.49519	LQ	-3.92974	0.720779	-5.70802	-5.91023	-6.6334	-1.90516	-6.63566	-2.01683	-4.73159	-4.37082	-4.50947	-3.39469
b0739	tolA The Colicin A Import System	0.281525	0.445525	-3.40333	-7.47277	-5.10673	-9.57144	-5.8022	-7.11107	-4.56516	-7.52018	-5.75449	-3.83476	-6.1689	-5.35263	-8.09097	-4.98854	-5.76163	-8.25337	-4.78112	-7.04864	-5.66728	-7.37552	-3.5212	-5.71885	-3.76171	-5.52173	-7.99457	-6.00784	-3.62133	-3.56347	-7.13328	-10.1414	-5.56897	-3.93664	-6.3669	-6.95438	-7.25463	-1.85458	-7.71582	-4.39563	-6.58531	-4.75431	-5.48086	-2.63729
b0740	tolB The Colicin A Import System	-1.27421	0.546055	-3.2286	-1.58795	-2.85939	-2.55329	-3.21249	-5.58134	-3.43095	-2.20092	-2.76737	-1.6373	-2.23679	-2.05124	-3.14399	-3.18958	-1.96405	-3.26105	-1.96485	-3.87134	-1.41705	-2.17448	0.133468	-3.42971	-1.42075	-1.16233	-1.00162	-1.771	-1.45316	-1.15168	-3.46826	-4.59847	-2.66333	0.590539	-4.89098	-2.95618	-4.69676	-1.52142	-4.70028	-1.57054	-4.32475	1.21828	-1.96985	-2.91456
b0741	pal The Colicin A Import System	-1.04321	0.650404	0.0962411	2.67264	-1.32395	0.379343	-0.848684	-1.87789	-1.83023	0.765327	-0.958167	-0.302415	-1.09082	-0.968977	-1.24215	-1.3371	-1.31847	-1.76822	-0.982022	1.77962	-1.91301	-1.22092	0.874694	-0.0257212	0.0833697	1.63048	0.997119	-0.555853	0.790171	-0.241412	-1.64628	-3.04893	-1.61867	-1.6719	-2.41924	-0.136343	-3.02344	-0.27822	-2.76217	1.06942	-2.28103	-0.449888	1.60814	-0.965799
b0742	ybgF predicted periplasmic protein	0.288485	0.386424	-6.5459	-2.71865	-2.55696	-3.79304	-1.93134	-5.1066	-5.03971	-4.40641	-3.99329	-1.58087	-7.07187	-4.16823	-4.60841	-5.74333	-4.31839	-4.52682	0.125181	0.00282378	-5.69154	-5.03181	-3.21049	-4.71674	0.420247	-0.678585	-1.24639	-3.5115	-3.85753	-1.78681	-6.89622	-6.84087	-1.09434	-1.4761	-6.10384	-1.53888	-6.57104	-3.471	-6.25932	-3.39763	-3.61629	-3.70508	2.40131	-5.77658
b0750	nadA quinolinate synthase	1.02391	0.615224	-0.457201	-3.03694	1.90411	1.61113	1.70009	2.13897	1.18951	0.187045	-2.74548	-4.90406	-5.34161	-4.22939	-4.05469	-2.70342	-2.07788	-2.44027	-4.68809	-4.2466	-5.63324	-2.65741	-4.58549	-2.8178	-3.35183	-3.08096	-2.94645	-2.2673	-2.73938	-1.73034	-2.62434	-2.43827	-4.90405	-6.18242	-3.99657	-3.64834	-7.04322	-4.72444	-5.86526	-4.67429	-6.84772	-5.92948	-5.64268	-3.26502
b0751	pnuC PnuC NMN transporter	0.226101	0.563709	-0.605746	-0.0126428	0.299111	0.466103	-0.819576	LQ	-0.432936	0.566303	-0.922987	-0.675513	-0.276552	-0.0266574	LQ	-0.484985	-1.73516	-1.46495	0.42402	-0.183298	3.75461	-1.54058	0.199339	-0.982431	-0.505019	0.23075	0.0796205	-0.662725	-1.88747	-0.547575	-4.01188	LQ	-2.5864	-1.67676	1.29124	0.166206	-2.51812	0.191039	1.64934	-1.11547	-3.06894	-1.31564	-1.51275	-3.49046
b0752	zitB ZitB zinc CDF transporter	-0.138463	0.601114	0.522767	-1.02248	-0.106595	-0.165117	-2.16829	-0.344143	-0.478935	-0.465905	-0.0867855	-2.94937	0.829946	0.410886	0.485868	0.789896	2.63986	2.73266	0.830858	-0.329987	0.310913	-2.46931	1.65797	0.758794	0.761002	0.309742	0.112482	1.02543	2.32745	1.56379	-4.6272	-5.7975	0.153395	-0.704948	0.931734	3.65449	-0.782877	0.929511	1.61711	1.23175	3.78779	0.694941	-0.668168	-1.22443
b0753	ybgS conserved protein	1.46683	0.903176	-2.52133	-0.935954	-1.53654	-1.194	-2.55118	-1.63028	-1.9969	-2.14771	-1.65798	-2.01619	-1.41253	-0.919392	-1.01636	-1.43983	-1.4796	-1.78175	-2.12198	-2.89377	-2.55753	-2.89249	-1.39465	-1.40993	-1.11567	-0.932311	-0.876118	-1.53323	-0.482998	-1.7119	-2.8121	-3.19034	-1.87153	-1.23494	-1.5263	-1.01964	-1.55044	-0.690645	-2.36219	-1.36246	-1.96024	-1.51027	-1.84888	-3.08882
b0754	aroG 2-dehydro-3-deoxyphosphoheptonate aldolase	0.338178	0.482545	-1.42702	5.38063	2.66372	1.26659	1.65754	5.52469	-0.395565	0.608606	-0.460225	-2.57358	-1.50674	-1.66966	-1.82678	-4.10961	-0.6926	-0.839073	-3.14464	-4.85876	0.657304	-1.3862	-1.35258	-0.800037	-0.776665	-0.851688	-0.740205	-1.84757	-1.84028	-1.31193	-2.17592	-2.1798	0.188933	-1.81274	-1.58958	-2.98086	-5.23377	-0.693318	-4.33128	-2.84187	-0.774418	-3.04421	-4.07838	-5.74136
b0755	gpmA phosphoglyceromutase 1 monomer	0.462387	0.647513	7.63437	8.31459	5.83596	5.16695	10.3103	8.52841	4.81844	3.89529	-2.57884	-3.035	-2.87912	-2.19562	-2.16895	-1.72324	1.32295	1.00241	-1.40393	-1.19507	-0.977613	-2.88568	-0.826621	-3.10503	0.1189	-1.64653	-1.85988	-0.963274	-3.06318	-0.384191	-5.16359	-4.97847	-2.38706	-3.5471	-5.16242	-2.13049	-0.747927	-0.0476558	-4.4947	-2.18676	1.31512	2.1393	-3.60924	-2.64513
b0756	galM aldose-1-epimerase	-1.03427	0.928136	1.36202	3.85456	2.75052	2.19149	2.76206	3.94183	1.17382	1.86887	1.32974	1.14589	0.945455	0.897472	0.809858	1.34838	0.00138995	0.342631	1.77717	-0.312078	-2.09927	-0.896694	0.806663	0.361946	0.464735	0.63817	0.687062	0.463768	0.504911	0.929322	-1.81658	-1.83084	0.238439	-0.0446955	-0.799165	0.47376	0.0837277	0.0860954	0.901796	-0.294838	-1.43093	1.28123	0.164002	-0.15868
b0757	galK galactokinase	-1.03602	0.746859	0.985958	1.31857	0.97171	0.679814	-0.0901129	0.692607	-0.81038	0.306657	1.45445	1.46466	1.31547	1.47423	1.26768	0.319952	-1.88722	-0.980402	-0.319763	-2.61422	0.933834	2.19827	0.675425	-0.278932	2.15607	-0.680282	-0.164731	-0.304921	-1.2163	1.04369	-3.00847	-3.0562	0.947417	0.584088	-0.306944	-1.34431	2.4473	-0.074384	-0.104084	0.214105	-2.83265	1.51796	-2.20747	1.1359
b0758	galT UDP-glucose-hexose-1-phosphate uridylyltransferase [multifunctional]	-1.08348	0.72607	1.64971	3.22583	2.28098	1.1927	0.677478	1.71132	-0.832089	0.991097	2.89959	5.26587	1.15425	1.98968	1.59713	1.18098	2.13118	1.78431	-2.05301	2.64695	-0.806009	0.208213	2.36095	0.349373	2.89403	2.16149	2.35672	1.29693	0.763881	-0.991297	-3.93395	-4.22829	1.96257	3.59125	1.83767	0.818466	-1.4118	1.95827	0.307203	1.85293	-3.41959	-0.869778	0.305407	-0.306274
b0759	galE UDP-glucose 4-epimerase monomer	-0.859454	0.666812	-0.672414	-1.25153	-0.524783	0.0340195	-1.99928	LQ	-1.70399	-0.292736	1.52727	-0.454934	-0.452184	0.48512	0.467622	-0.906024	-1.54993	-1.57494	-2.38345	-3.33882	-2.48345	-3.65167	0.345117	-1.08231	-1.09257	-1.71789	-2.41322	-2.33808	-1.59489	-0.962112	-3.09586	-4.85999	-1.78841	1.38138	0.304644	-0.705737	-0.3275	2.127	-0.933392	-0.0874499	-4.71437	-0.882312	-3.03691	-1.982
b0760	modF ModF	-0.352614	0.321851	0.542654	-2.50269	-2.61832	-1.84806	-6.36275	-2.37879	-1.97434	-3.40625	-1.35897	-1.90617	-2.27327	-2.10957	-2.17624	-1.92609	-2.59913	-2.46965	0.346316	-0.74606	-5.70802	-4.30625	-1.62571	-1.07449	-0.572617	-2.03883	-2.15087	-3.45374	-1.68401	-1.45816	-6.10623	-5.93175	-3.74266	-4.16046	-3.35762	-2.5087	-3.51049	-0.767516	-3.19683	-2.86863	-5.95164	-1.36877	-3.12963	-0.589939
b0761	modE ModE-MoO 4 2- transcriptional dual regulator	-0.323623	0.771625	0.791817	-2.54021	0.241349	0.683504	-2.92156	-0.0984101	-1.54266	0.284656	1.54257	3.51702	1.02293	0.724622	0.677271	-0.0446273	-0.411635	-0.643746	-1.97185	0.430551	-2.65878	-2.40523	0.382273	1.41278	0.938169	0.522414	0.50738	0.274556	1.57033	0.0769761	-2.32464	-1.91392	0.72721	-0.625708	0.88279	-0.185769	2.53717	0.0927478	-3.63277	2.16084	0.291018	1.40332	-2.99031	-2.15901
b0762	ybhT predicted protein	0.267306	0.234005	-1.35447	0.452109	-1.7452	-0.527455	-1.76064	1.76848	2.28012	-1.03952	-1.68741	2.01649	-1.77676	-0.922656	-0.526797	-3.20524	-1.12723	-0.970959	2.21909	-3.02279	-1.26209	-2.74201	0.266186	-1.53047	-0.0243478	-0.870677	-1.60447	-1.0924	2.29437	1.34324	-2.22299	-2.87463	-1.34343	-1.92758	-1.67664	-1.37664	-3.32305	2.59502	-2.98836	0.529586	-0.756729	-0.984255	-2.34126	-1.81018
b0763	modA molybdate ABC transporter	-0.0875445	0.521762	-3.93704	-3.1542	-1.25916	-0.174652	-4.47465	-0.518003	-1.02615	-3.4472	0.32397	-1.83396	-0.0682984	-1.42949	-1.79151	0.195319	-1.22775	-1.70361	-0.976507	-5.78985	-0.721394	-2.56205	-0.541747	0.945013	-2.88961	0.000798383	-0.417944	0.304567	-1.24747	-0.447815	-6.30428	-6.62255	-1.93241	-0.00515686	-2.87468	0.524819	-6.09277	0.565928	-2.32881	-1.47203	-0.427398	0.473723	-2.7414	-2.64439
b0764	modB molybdate ABC transporter	-1.05546	0.82174	-1.33677	1.26817	-0.0639904	1.29591	-2.3037	0.0121087	-0.36086	-0.879677	1.27533	-0.972833	0.670807	1.1321	0.665513	-0.343588	1.90608	1.77288	1.2683	-2.15073	-1.48734	-0.190273	-0.112261	-0.337948	-0.958632	-0.801071	-0.683265	0.800843	-1.12128	-0.43996	-2.98616	-3.53853	-0.886952	2.89176	0.142013	-0.937297	-2.98071	-0.322782	-2.25497	-0.472312	-0.74341	0.957091	-0.658757	2.11366
b0765	modC molybdate ABC transporter	-1.84954	1.29179	0.771905	1.4252	1.9429	1.5697	-0.901954	1.36334	0.325878	0.875659	1.69625	1.63996	0.958805	1.71516	1.68754	1.2819	1.23694	1.15151	1.44438	-1.2218	1.30615	-0.279078	0.952692	1.1333	2.01795	1.37037	1.38521	1.51131	1.12692	0.450195	-0.932578	-1.03689	1.51334	2.30951	2.02376	0.915651	-1.24885	1.55392	0.662291	2.17291	1.89738	0.494526	1.87287	0.262423
b0766	ybhA pyridoxal phosphatase / fructose 1,6-bisphosphatase	0.434967	0.593166	LQ	1.05701	LQ	-0.16357	LQ	-0.0573356	LQ	-1.07907	LQ	1.76551	LQ	-0.371756	-0.214451	LQ	-1.46776	-1.36214	1.30589	-2.35543	LQ	-2.12572	0.547018	-0.976718	1.56068	1.18446	0.998598	LQ	-0.64011	-0.420158	-4.38145	-4.39324	LQ	0.683023	LQ	-0.498204	-0.733812	0.432478	-2.76859	0.341869	2.16531	LQ	0.370514	LQ
b0767	pgl 6-phosphogluconolactonase	-0.319067	0.50163	-2.93547	-1.93208	-1.79511	-0.696881	-2.15103	-1.19267	-5.0167	-1.82853	-1.62183	-0.918983	0.141501	0.509539	1.15275	-0.854455	-1.05068	-0.53081	2.16461	-2.35642	0.322696	0.131764	0.858033	0.474522	-0.643492	-1.18599	-0.241494	3.41773	1.30811	0.660725	1.90551	2.67372	-2.78876	-0.794589	-0.435533	-0.435723	-0.387544	-0.539398	-3.38695	-0.917339	2.97544	-3.05081	-1.54489	-1.41303
b0768	ybhD predicted DNA-binding transcriptional regulator	2.29915	0.349305	-1.52831	-4.62119	-2.86242	LQ	-1.11186	-4.87949	-5.5115	-7.9445	-1.88121	-3.39298	-0.554222	-1.27073	-2.85031	-1.78104	0.475984	0.728268	-0.108547	-0.124488	-0.443047	-0.112214	-3.16042	-2.09485	-5.39345	-0.312513	-0.146823	1.69352	1.1382	-0.134528	-4.67942	LQ	-0.481192	-1.13846	-0.174207	-1.82478	0.921439	-2.16023	-2.20095	-2.0578	5.85724	-3.90753	-0.847505	-1.72751
b0769	ybhH conserved protein	1.38055	0.740041	1.48724	0.0737178	-0.552203	0.917365	2.102	1.07252	-1.8544	-3.47352	1.06994	0.0593404	1.0504	0.997678	1.05804	1.17133	-0.582119	-0.459049	0.598713	-0.854786	0.534648	-0.106886	0.944073	0.856583	0.721552	0.65484	1.11276	0.325642	0.201668	0.890031	-0.34755	0.445647	0.598852	-0.35802	0.155607	1.02723	2.09514	1.42486	-0.114953	0.97852	-0.926301	1.52892	0.394258	0.384556
b0770	ybhI YbhI DASS Transporter	1.50859	0.416951	1.0944	-0.467225	-0.55251	1.02023	-3.59708	1.34754	-3.8918	-2.27547	0.465115	-0.4425	0.570343	0.997553	1.58072	0.245147	-0.756508	-0.450785	0.185986	0.422171	0.0771545	-0.438015	1.18785	0.695882	0.294962	0.856804	1.43652	0.0790495	1.6347	1.02555	0.754955	1.33116	-0.743017	0.619118	-0.943181	0.516312	0.699176	0.00385393	-0.951836	1.02774	-2.58263	1.07747	-0.612303	-0.199533
b0771	ybhJ predicted hydratase	0.33945	0.341836	2.02199	0.067124	0.673981	LQ	0.530236	LQ	-1.18281	0.171786	0.984638	1.60199	0.508098	-0.210021	0.201259	0.147081	0.281206	0.0103339	0.293338	-2.7985	-0.725023	-0.490718	0.872131	1.39758	0.789289	-0.467847	0.5037	0.300535	1.90454	0.991512	0.507713	1.72006	0.698716	1.26693	1.79364	0.308705	-2.9674	1.42935	-1.76657	0.805839	-0.505601	1.51728	-1.52081	1.39968
b0772	ybhC esterase/thioesterase	0.529768	0.451453	-0.255326	-5.64289	-1.03871	-2.64929	-5.63183	-0.29956	-2.23969	-3.42986	-1.56209	-1.84525	-0.730916	0.151738	-0.434204	-1.19593	-2.097	-1.58222	-1.49876	-8.57953	-6.81351	-2.51263	0.373907	-2.81527	-3.04522	-2.92465	-3.25151	-1.35608	-3.31517	-0.957134	-3.42716	-3.53469	-4.43209	-5.33455	0.241286	0.00683361	-4.09337	-0.847874	-6.45714	-1.86781	-7.32678	-0.594136	-5.33375	-0.172721
b0773	ybhB predicted kinase inhibitor	-1.05552	0.946256	0.0658391	0.50272	0.602319	0.732945	1.06745	1.47896	1.58304	0.715599	0.777068	2.16717	0.95107	1.05977	1.00675	0.334416	2.47043	2.30357	0.669859	-0.543095	0.603139	2.08699	1.20241	0.0508009	1.74288	0.607731	0.812213	1.00789	0.449727	1.61019	0.100894	0.286318	0.261761	0.755694	0.757852	1.49581	0.939461	1.64907	0.808311	1.22007	2.38343	0.713561	-0.0994676	1.46807
b0774	bioA adenosylmethionine-8-amino-7-oxononanoate aminotransferase monomer	-0.847078	0.589878	-2.43557	-3.62589	-2.37298	-1.20111	-3.32737	-1.07997	-3.25421	-2.4116	-2.2567	-0.184858	-0.746777	-0.725155	-0.698851	-0.904884	-2.37243	-1.76095	1.41121	-1.33059	1.58474	-0.483842	1.43457	-3.36115	0.744995	-1.02968	-0.632942	0.256201	-0.250051	1.08217	2.41465	3.05991	-3.05374	1.03913	-2.47422	-3.05399	-3.03129	-0.916066	-1.75261	-0.100891	2.11293	-0.973076	-2.45129	3.32214
b0775	bioB biotin synthase monomer	-1.46779	0.661643	-1.36393	-2.03545	-1.59628	-0.837153	-2.53407	-1.90457	-2.82571	-0.679114	-1.58587	-0.341403	-1.68373	-0.498577	-0.520389	-0.504321	-0.87554	-0.756045	1.33395	4.55327	1.10315	0.875941	2.00779	0.879116	-0.159938	-0.0791276	0.481929	0.195179	1.08143	2.84848	-1.446	-0.698522	-2.7297	0.0949453	-2.63753	-0.784687	-2.50558	-0.466799	-2.53191	-0.441605	0.176137	0.293211	-1.39833	3.18632
b0776	bioF 8-amino-7-oxononanoate synthase monomer	-0.371512	0.468569	-5.08896	-4.46448	-2.69058	-3.36616	-1.02813	-4.40755	-6.23362	-0.481833	-2.21853	-0.772552	-2.05713	-0.576493	-0.798488	0.141388	-2.02152	-2.8034	3.13279	-0.466752	2.87744	0.947196	0.750061	-0.622038	-0.346485	-0.361056	-0.0179517	3.90811	3.70053	2.72363	1.36306	2.03908	-2.41524	-0.543067	0.904743	-2.34649	-0.306383	-1.34618	-2.93137	1.07131	0.709287	0.104434	-3.69082	5.74524
b0777	bioC predicted methyltransferase, enzyme of biotin synthesis	-0.293402	0.531624	-3.36997	-3.04247	-2.19045	-1.69547	-2.21226	-2.61187	-3.42952	-0.813847	-0.513037	-2.80575	-1.13994	-2.35961	-2.53914	-1.33751	-5.68437	-4.61405	-0.280407	2.73136	1.34729	-1.07671	-0.241786	-0.351476	-0.0941412	-1.5882	-1.31208	3.05312	2.82501	0.417318	2.29883	2.40955	-0.805573	1.24143	0.656901	-1.29086	-5.67537	-2.23176	-5.92992	0.438491	4.43395	-2.27166	-3.08786	3.96259
b0778	bioD dethiobiotin synthetase monomer	-0.273297	0.665879	-2.26764	-2.46541	-1.75338	-0.219574	-1.89957	-2.76531	-4.20878	-2.53252	-2.58919	-1.90576	-1.1078	-0.153451	-0.584066	-0.169783	-3.22114	-2.63034	-1.95769	-0.394999	2.0384	-0.694935	-0.670099	-0.800823	-0.257494	-1.3206	-1.14655	1.31478	-0.00959752	2.30167	-1.10469	-1.36665	-2.49525	-1.16696	-4.39022	-1.0799	-3.65157	-1.32058	-3.91937	-1.90067	-0.586623	0.684883	-1.91138	1.18733
b0779	uvrB DNA repair; excision nuclease subunit B	-1.39996	1.01298	1.04913	0.423671	0.707372	1.29125	0.192007	0.412032	0.528506	0.809431	1.31769	0.458618	1.6329	0.987592	0.916478	1.10926	-0.715281	-0.621237	0.81841	0.961915	0.563267	0.188617	1.38998	1.43879	0.511704	0.791174	0.892091	0.484451	1.13914	1.96246	0.110046	-0.100119	0.649821	-1.10318	0.133636	1.66597	0.716705	0.626182	-0.780634	0.0534484	2.54016	1.56374	0.125291	-0.67929
b0780	ybhK predicted transferase with NAD(P)-binding Rossmann-fold domain	-1.09784	1.20772	0.808558	1.09724	1.1381	-0.0833259	-0.707161	1.27145	-0.11954	-0.0162129	0.890164	1.54391	-0.238163	0.633045	0.658675	0.248941	-0.168583	0.0968846	2.52831	-0.332768	-0.978983	0.0772733	0.575223	0.735675	1.16712	1.15862	1.41149	0.918872	2.08235	1.14928	2.19313	2.31279	1.20716	-0.064673	1.27902	0.326656	-1.26175	0.524361	1.61316	1.19551	2.07665	-0.668307	0.869351	-0.442857
b0781	moaA molybdopterin biosynthesis, protein A	-1.14943	0.587288	2.92216	1.95713	1.08366	2.17695	-2.78163	1.24079	-1.63972	1.9067	2.2053	0.196378	2.16602	2.77129	2.50954	1.76275	2.13824	2.29705	3.96938	-2.71996	-1.85923	1.79575	1.98406	0.232443	1.95682	0.996331	0.99558	2.28898	0.66291	1.77376	-1.19904	-0.400313	-0.338001	0.553223	1.91486	2.21318	-1.67937	2.08235	-0.80231	0.966887	-1.17798	0.665698	-0.718694	0.160362
b0782	moaB MoaB subunit	-1.05919	0.723861	0.393404	-0.45762	1.18786	0.628571	-0.508943	0.00343867	-0.707928	1.62142	0.562236	2.04893	1.10138	2.04425	1.82149	0.7495	0.733277	0.629826	0.192405	3.23092	-0.404784	0.325151	1.26539	1.63103	1.56408	1.50332	2.24833	0.00030111	0.743994	1.67796	1.42864	1.17505	0.90263	-1.14016	-0.691401	1.67971	-0.701384	1.0477	0.099017	-0.89549	-1.78317	0.34555	-1.05537	2.91323
b0783	moaC molybdopterin biosynthesis, protein C	-0.445573	0.872202	1.76178	-0.167501	0.00596069	-0.684056	1.48385	0.599133	-0.298019	0.511155	-0.0483062	-0.51483	-0.149849	0.0636277	0.128465	-1.3758	-1.86381	-1.30627	1.98086	-2.1061	0.439836	-1.24297	0.317873	-0.581567	-0.23052	-0.800717	-0.473827	-1.21025	-0.860667	0.129965	-1.44328	-0.672793	-0.972176	-0.29986	-0.816878	-0.44518	1.01041	-0.234748	1.00528	0.102943	-2.24993	-1.07914	-1.41455	-0.981307
b0784	moaD molybdopterin synthase small subunit	-1.09946	0.703743	0.0895459	0.178738	0.488196	0.806037	0.312485	-0.443738	-0.243546	LQ	0.272586	1.18082	0.0678297	0.293207	0.921791	-0.538376	-0.454414	0.160183	0.867979	-0.450804	-0.687808	-0.149746	0.978931	LQ	0.882292	-0.255906	LQ	-0.336439	1.23185	1.12125	-0.173311	LQ	1.45957	1.45929	-1.01206	0.147687	-0.337929	1.62328	0.038355	0.821018	-0.4872	-0.326482	0.0556185	-0.151704
b0785	moaE molybdopterin synthase large subunit	-1.41306	0.885602	2.78019	1.49839	0.239552	1.60624	-0.629717	0.626832	-0.81902	-0.212525	1.19925	0.232244	1.0513	0.705067	1.07444	1.53986	-0.0378362	0.271303	0.374816	-0.036245	-0.392362	-0.398942	1.17094	-0.162866	0.808528	0.0694884	0.789637	0.521235	1.68666	1.3989	1.31209	2.09958	-0.29969	0.239486	-0.778036	1.29398	-0.38256	1.96329	1.76197	-0.00967036	-1.05576	0.357859	-0.152141	-0.0591504
b0786	ybhL putative transport protein	0.380113	0.913761	1.9262	-0.121362	0.75921	1.22709	-0.969067	0.569555	-1.7005	-2.50224	1.14712	1.35146	1.18628	1.53188	1.54512	0.73243	0.705683	0.595443	-1.83676	-1.6422	-2.12804	2.15832	1.69547	2.09958	1.99235	0.943059	1.27096	1.75042	1.75467	1.31865	1.21635	1.78748	1.75358	1.81766	2.33532	1.88197	1.22493	-0.340082	2.55923	0.91517	-2.22612	1.67772	0.140981	1.70908
b0787	ybhM conserved inner membrane protein	1.94616	0.487389	-1.69639	-0.304503	-1.49721	-2.64053	-1.88726	-0.596502	-1.05209	-6.56793	-1.25825	-1.1951	-0.213344	-1.30648	-1.50973	-0.539302	-1.73342	-1.74678	-0.946969	1.65612	0.250654	1.4406	-1.52872	-0.548638	-0.890952	-0.591415	0.380291	-0.0282728	-0.406074	-0.0351268	-0.816791	1.02304	-0.0867455	-1.9144	0.318201	-0.762439	-3.3198	-1.41347	1.98161	-0.621595	-2.63374	-1.18848	-0.603123	-1.67153
b0788	ybhN conserved inner membrane protein; predicted DNA-binding transcriptional regulator	0.058283	0.572417	-0.665011	0.339228	0.62785	-0.635064	1.37427	2.96157	-3.26227	-2.23896	1.01961	-0.309199	0.346006	1.32317	1.39522	0.539893	1.32998	1.47363	0.184541	2.53031	-2.05179	0.507512	1.21696	3.0677	1.2238	0.706917	1.20852	1.96124	0.513458	1.5609	4.79863	5.24943	0.541511	2.53189	0.219561	0.371476	1.5013	1.96208	1.80246	1.88882	-3.7215	-1.19375	-0.528607	2.14357
b0789	ybhO cardiolipin synthase 2	-0.768967	0.38956	2.80284	0.335486	0.143147	0.166748	3.18172	0.753516	-3.39226	2.01342	0.564919	-1.1829	0.0195821	-0.708538	-0.260047	-0.835369	-4.76323	-3.27427	-2.21082	-5.71153	-0.164538	0.738646	1.02718	1.86991	0.330676	1.28587	2.52565	-1.12775	-0.0329206	2.35674	-5.42565	-4.22386	-0.474229	-4.31462	0.235386	0.333793	-4.60067	-0.710041	-4.4116	-0.0838145	-4.24124	0.00556941	-0.487369	-0.602238
b0790	ybhP predicted DNase	-0.626901	0.233506	0.547881	-0.946001	-1.01045	1.71636	-0.0335705	-1.28076	-5.64727	6.18436	2.99716	1.07606	0.634505	-1.45211	-0.0318771	-2.18381	-2.18983	-0.7415	0.175203	-8.29862	-0.114753	0.536074	1.99109	3.00551	-0.135024	0.495051	1.98302	-1.25954	0.0523359	6.71553	-9.51876	-5.72732	-2.96002	1.26468	-4.66435	-3.16558	-5.60209	2.08332	1.42777	-2.54236	2.40351	1.60447	-1.54452	-1.05257
b0791	ybhQ predicted inner membrane protein	-0.110875	0.99582	-1.03835	-0.984241	-0.0601005	-0.342731	-1.54702	-0.889757	-1.13145	0.449043	-0.0770443	-0.391646	-0.0707668	1.17698	0.810758	-0.380449	-1.47362	-1.17396	-0.985074	-1.86843	0.622796	-1.2277	-0.132494	-0.353591	1.42817	-0.173309	0.0547962	-0.997559	-0.725266	-0.017718	-2.35722	-2.04713	0.742703	0.155853	1.38524	0.115075	-1.71814	-0.184581	-0.103803	0.805815	-1.50528	-0.069402	-1.21526	-0.823827
b0792	ybhR YbhF/YbhR/YbhS ABC transporter	-0.091244	0.663699	-2.92358	-1.43618	-1.29494	-0.152176	-2.71705	-0.542751	-3.40331	0.157185	0.109062	-1.89988	-1.33525	0.764877	0.703441	-0.137472	-1.37824	-1.33779	0.521435	0.986935	1.10774	-1.04708	0.294428	-0.462311	0.580082	-0.719899	-0.158028	-0.0318955	-0.800611	1.19877	-2.77259	-2.89157	-0.0694994	-0.106606	-0.106015	-0.0810619	-2.72548	-0.0606683	0.421916	-0.290665	-2.8947	1.8823	-1.26423	-2.47382
b0793	ybhS YbhF/YbhR/YbhS ABC transporter	0.0315341	0.208691	1.42374	-4.78673	-4.2154	-3.90111	-13.5164	-3.05624	-12.499	-5.81554	0.15337	-0.739752	-1.72189	-1.69854	-1.61374	0.596623	-8.65064	-7.74297	7.28877	0.595214	-12.8502	-0.709664	2.305	5.4732	1.14261	-0.218584	1.72851	0.918568	-2.19242	2.70487	-9.04126	-7.72262	-0.605001	1.77772	-0.186458	-2.2773	-1.59259	-3.17253	3.07241	-0.899891	-7.68801	4.30481	-2.27204	-3.23938
b0794	ybhF YbhF/YbhR/YbhS ABC transporter	-1.0073	0.673352	1.75066	-1.27755	0.618377	1.11366	-0.946042	-1.40263	-1.62029	1.60553	1.41596	1.68632	1.4419	1.68393	1.88009	1.57913	-0.639677	-0.458839	1.65257	-0.105034	0.673979	-0.393958	2.06928	-0.0696599	0.528693	0.228483	0.311735	1.2	0.555125	1.50111	-2.07691	-2.02583	0.413073	-0.633484	0.235469	0.823906	-1.48195	1.59606	-0.0434154	0.294552	1.69178	1.4379	0.131837	-0.560811
b0795	ybhG predicted membrane fusion protein	-0.801362	0.60326	2.01282	0.351743	0.331014	0.387156	-2.45985	-0.105224	-3.20884	1.72033	2.01922	-0.925646	1.85909	1.57963	1.34891	2.36997	1.36214	1.79117	-0.000578687	-3.96328	-2.39035	-0.21797	1.81665	-1.0211	2.29801	0.713636	0.540528	0.532045	-0.636712	1.77183	-0.658307	-0.92356	-0.190278	-0.418732	2.028	2.02957	0.770826	1.09935	-3.62037	-0.303339	-3.17261	-1.0973	1.10304	2.50087
b0796	ybiH predicted DNA-binding transcriptional regulator	0.408559	0.438823	-2.61069	-1.44617	-1.33854	-1.12166	-0.978459	-3.84295	-2.49399	-2.09596	-1.15028	1.80006	-1.27419	-0.942403	-1.00403	0.344039	-0.343799	0.440661	-2.54789	-6.22709	-2.50649	-4.98439	-0.695477	-0.764962	-0.793868	-2.05911	-2.06349	-1.59022	-2.56946	-0.991229	1.96362	2.33497	-2.11616	-2.25879	1.97761	-2.16991	-5.27909	-1.91608	-6.32758	-0.633012	-6.36665	-4.14152	0.00627046	-1.99091
b0797	rhlE DEAD-box-containing ATP-dependent RNA helicase family member	-0.377911	0.420657	-2.8278	-0.836116	-0.0841463	-0.205133	-4.85784	-2.5148	-0.961943	1.11703	0.29992	-0.482897	-1.35923	0.0854322	0.0483646	-1.41545	1.31338	1.76778	-2.79596	-6.07977	0.754772	-4.10966	-0.45572	-1.51609	1.86065	0.744699	0.607449	-2.56672	-1.75104	-1.22044	-3.66792	-4.47819	0.0449949	-0.373908	0.000737328	-2.95886	1.84114	1.02313	-1.91693	0.53008	-6.31045	0.196539	-3.81783	-2.72223
b0798	ybiA conserved protein	-0.0884847	0.30541	-3.91446	2.02932	-0.526718	-2.10978	7.18023	2.24432	-1.35457	4.07398	0.981486	0.816251	1.22513	-3.34556	-2.80959	0.201292	5.89259	6.13145	-2.28428	-4.17566	3.68547	3.00305	-0.5227	-1.02465	0.479344	1.38072	1.31408	-0.300883	-1.29468	-1.69529	-5.60224	-5.75865	3.98401	-0.214905	2.18999	-3.12573	4.8641	-0.342671	1.79524	2.58899	-5.62813	-3.25832	2.99588	-2.85671
b0799	dinG ATP-dependent helicase	-0.540307	0.190833	-3.60705	0.0762899	1.26478	-1.64211	-11.5422	-1.68713	-3.04131	0.883711	-0.234916	-2.35724	-1.58137	-0.841123	-2.52988	-4.35203	-2.43878	-1.68246	-3.11683	1.9841	5.92153	2.70089	0.749825	-1.91501	2.03547	-1.78895	-2.25906	-5.55549	-1.22544	-1.26328	-9.13167	-9.4811	-0.958715	2.81862	0.365629	-2.43881	-2.3261	0.160947	-4.7212	0.541846	-7.23192	-0.323497	-5.80725	-10.1405
b0800	ybiB predicted transferase/phosphorylase	-1.74543	1.11935	0.737536	0.589145	0.333542	0.836438	0.843612	0.469933	0.367883	1.8268	1.58591	2.35349	0.866084	0.936076	0.803594	0.969595	1.46234	1.30743	0.52654	2.00961	-0.0668149	-0.229745	1.16856	0.962476	0.644094	0.732959	0.926601	0.519816	0.304592	1.14565	-0.203093	0.215308	0.958307	0.780583	-0.269794	1.27871	1.66566	1.07698	-0.732075	1.14672	0.496421	0.154981	-0.364934	-0.473099
b0801	ybiC predicted dehydrogenase	-0.466987	0.855303	-0.961844	-1.15924	0.438535	0.0144618	-2.27609	1.95896	-1.19769	0.653888	0.664466	1.38056	0.0277506	0.180234	0.405311	0.337826	-1.20678	-0.850288	-1.05852	0.614042	1.36008	-3.11112	0.597972	0.889078	1.42888	1.32108	1.58787	-0.257325	-0.8587	-1.32666	1.484	1.78023	-0.0730728	-0.0497354	0.362444	-0.743042	0.0174361	0.500797	-1.75051	-0.52251	1.82493	0.933316	-0.802959	-0.65639
b0802	ybiJ predicted protein	-0.589157	0.456439	1.28132	0.606455	0.0233462	0.713069	1.37794	1.74882	-0.11473	0.753048	0.204646	0.742913	0.831163	0.152235	0.973655	1.13736	-0.498309	0.358987	0.673801	2.26557	-0.774334	-0.657739	0.513968	-0.204083	0.181512	-0.234533	0.383342	-0.620944	0.715805	0.601187	-1.99339	-1.15232	0.0335761	-0.413612	-0.83575	-0.721592	-0.989307	1.05224	-1.28905	0.140575	-1.42168	0.409423	-0.741823	0.0916525
b0803	ybiI conserved protein	-0.178316	0.324378	-1.73948	-0.865921	-1.83798	-0.664667	-2.65851	-1.108	-0.561946	-0.972468	-1.85823	-0.601294	-0.641454	-1.7497	-0.719237	-1.9519	-3.52765	-2.04062	-2.31593	-3.91284	-1.73355	-2.94242	-0.475602	-3.11169	-1.53159	-1.63242	-0.578567	-1.31068	-0.725598	2.95461	-5.31363	-4.20438	-2.43165	0.0939432	-2.90494	-0.669879	-0.999139	0.702036	-1.79706	-1.52579	-4.12752	-1.54919	-2.34397	-2.27761
b0804	ybiX conserved protein	-0.346749	0.539013	0.450992	1.40257	1.0105	-0.134618	-3.47965	0.199244	-0.690326	-0.181289	-0.586333	-2.07357	-1.09224	-1.04715	-1.15993	-1.54405	-3.94583	-3.44537	-2.42929	-3.52333	0.105717	-3.76599	-0.747261	-1.54284	-1.4304	-1.18646	-0.600569	-0.67065	0.192683	1.91282	-4.4759	LQ	-0.178064	-0.91522	-1.12651	-2.29828	-3.3932	2.31844	-3.64607	-1.22535	-5.02135	1.08215	-2.76667	0.494674
b0805	fiu putative outer membrane receptor for iron transport	-0.413146	0.547372	0.11464	-0.890329	-0.48022	1.6875	-1.12783	-0.229969	-0.556502	-0.543217	-0.646373	-1.03789	-1.36908	-0.0457758	-0.320751	1.54485	-1.07007	-1.25151	0.495915	-2.60297	-0.520953	0.544908	0.981437	-1.77039	0.491081	1.01644	0.984819	-0.181266	-0.844332	-0.239785	-2.92782	-2.43088	-0.787652	0.131932	-0.111568	-1.07839	-1.77266	2.10334	-2.87297	0.451108	-2.68573	1.41257	-1.76612	-0.23465
b0806	ybiM predicted protein	-1.35285	0.958335	-0.0846981	0.760565	0.374646	0.588013	-0.293204	0.342391	1.17933	0.246218	0.888061	0.942269	0.252536	1.0472	1.17424	0.326239	-0.0370053	0.540016	0.850397	2.09357	2.16469	0.326413	0.949633	1.14579	0.52621	1.01802	1.0618	0.995987	0.660565	1.47387	-0.882033	-0.27782	0.442486	0.224638	-0.442098	0.859255	0.850959	1.2185	0.208214	1.11051	-0.0580739	1.15548	0.594199	2.01627
b0807	ybiN predicted SAM-dependent methyltransferase	-0.379685	0.590042	0.557706	-1.31308	-0.0901671	0.146651	-2.23347	-0.123431	-1.09174	-1.47461	0.969307	1.95143	-0.774463	0.438848	-0.0451572	0.742609	-0.623317	-0.867955	-0.554403	0.113894	-2.19955	0.507674	-0.00434347	1.34684	1.39948	0.645418	0.44268	0.495007	-1.25873	1.30652	0.898434	1.20115	0.308022	0.645259	-0.0492237	0.303522	2.69653	1.35915	0.112269	-0.57456	0.569708	2.13239	-1.68822	-0.150246
b0808	ybiO predicted mechanosensitive channel	-0.276536	0.336449	0.311952	-0.434381	LQ	1.04024	-0.451016	2.00863	LQ	0.508324	1.75324	-2.7428	0.614089	-0.0839694	-0.250071	-1.37648	-0.8127	-1.32732	-0.56007	-3.31414	0.312065	0.0865713	1.35474	1.42743	0.661353	-0.0469693	-0.15746	0.572125	3.32703	1.9655	-0.358438	0.294477	-0.617733	-3.18635	-3.082	0.959343	0.409792	1.91723	1.1887	3.34755	-5.16347	1.517	-0.656354	-0.0426543
b0809	glnQ glutamine ABC transporter	-0.413213	0.668266	-1.97643	-1.62045	-1.1782	-0.417473	-3.35236	-2.09945	0.57624	-1.29076	-0.676667	1.76012	-0.917291	-0.297561	-0.695187	0.194127	-1.35793	-1.33877	-1.08099	-3.11629	-2.91113	-0.562572	-1.29826	-2.06727	-2.06875	-0.823077	-0.608081	-2.12378	-0.266206	-1.50496	-1.65143	-1.3626	-1.38408	-1.14323	-3.67774	-0.924693	-2.67735	-0.507659	-2.68199	-0.221032	1.0432	-1.8068	-2.84253	-0.663016
b0810	glnP glutamine ABC transporter	-1.29471	0.878366	0.0956414	0.0539767	0.257728	0.729173	-0.996694	0.732117	-0.856411	-0.103823	0.243418	-0.731538	0.565802	1.08851	1.03833	-0.198044	-0.453673	0.139656	2.15924	0.216985	-1.46831	-1.40422	0.982632	-1.65417	-0.807685	0.390724	0.726015	0.570541	1.35911	-0.44175	1.98475	2.13539	0.75295	-0.994682	-0.456411	0.528612	-2.38307	LQ	-0.894435	0.395864	-1.30217	0.440207	0.242539	-0.489584
b0811	glnH glutamine ABC transporter	0.253987	0.535936	-0.0134393	0.241915	-0.0566596	-1.61972	-4.88597	-0.193831	-0.0544912	-1.52002	-1.05969	1.50176	0.485895	-0.78648	-0.912513	-0.602056	-2.96985	-2.83577	-1.21643	-0.894325	0.193567	0.625771	-0.851462	0.603628	-0.685304	1.74377	1.11246	0.174968	-2.03404	-0.189966	-5.43549	-4.46431	0.34256	0.168723	0.429576	-0.29769	-4.47869	-0.69112	-0.910798	-1.52947	-3.35217	-3.75952	-0.660943	1.13359
b0812	dps stationary phase nucleoid protein that sequesters iron and protects DNA from damage	1.1127	0.49335	-0.307183	-3.07878	-1.77766	-2.34422	-2.99101	-2.37884	-2.24881	-3.13969	-0.619612	-1.19517	-2.13535	-1.53775	-1.36086	0.1911	-0.905384	-1.02984	-3.63015	-3.0333	-1.11391	-0.7601	-1.15363	-0.612768	-0.835712	-1.08266	-1.14451	-1.24907	-1.5222	-0.816199	-0.380929	-0.201007	0.0754952	-0.156352	1.1305	-1.84337	-4.84072	-0.489143	-0.192172	0.133776	-2.13655	-5.47043	-0.877181	-1.8611
b0813	rhtA threonine and homoserine exporter	0.324999	0.530119	-0.235011	-0.956194	-1.36623	-0.400566	-2.11468	LQ	-0.0897775	-1.11089	-0.705391	-0.334998	-1.21975	-0.596319	-0.319247	-0.221281	-1.6149	-1.29127	-1.16876	-1.15114	0.807052	-1.47307	0.0718174	-1.47182	0.130871	-0.900761	-0.947489	-0.507134	-0.00987977	0.0482555	-2.21727	-1.93233	-1.17904	-0.233347	-0.959955	-0.35681	0.431168	0.647586	-1.67244	0.623869	1.04171	-0.246465	-1.09017	-1.80944
b0814	ompX outer membrane protein X	0.569981	0.565662	-3.12601	-1.68382	-1.98832	-1.80184	-3.22675	-1.47301	-2.59256	-2.72202	-2.69781	-2.78357	-2.53202	-2.60555	-2.7494	-2.8697	-0.787078	-0.860166	-3.33043	-4.58366	1.35469	-3.87166	-1.81721	-1.97823	-2.83703	-1.53718	-1.65247	-1.36506	-2.66174	-1.12874	3.01126	3.38635	-1.88461	-1.26937	-3.95304	-0.450009	-4.75367	-2.19616	-3.05354	-1.03109	-4.48248	-2.25793	0.394171	-3.05441
b0815	ybiP predicted hydrolase, inner membrane	0.659753	0.37599	-3.32703	-1.96051	-0.797108	-5.08487	-5.8932	LQ	-0.940888	LQ	-2.29651	-3.53107	-1.08223	-1.71894	-1.91525	-1.87884	-5.28703	-4.35275	-5.21032	-3.82377	-3.20947	-0.159604	-2.89314	-1.83411	0.393924	0.303178	LQ	-1.17704	-6.48645	-5.20027	-8.0366	LQ	1.30054	-1.64453	-0.775181	-2.48453	-11.7906	-4.8147	-0.425589	-1.03908	-6.33984	-0.977916	-5.27528	-3.6552
b0816	yliL predicted protein	0.420449	0.587892	-2.08114	-0.775066	-0.0926787	-1.42451	-2.0264	-1.38024	-0.444145	-1.52672	-1.31715	0.55483	-1.41991	-0.955056	-1.02609	-1.44405	2.96159	2.23981	-1.03414	1.84925	-1.48798	2.15832	-0.659842	0.454874	-0.045806	-0.0381474	0.060592	0.144884	-0.645025	-0.749152	-0.661637	-0.406889	1.36807	2.47991	-0.894451	0.132596	-2.68905	0.0274274	2.64951	0.19805	2.52168	-1.7478	0.100192	-0.450915
b0817	mntR MntR transcriptional repressor	-0.364361	0.53863	2.39179	0.044644	1.0496	-0.0709409	0.199224	0.865409	-2.30405	-0.115608	1.08785	2.83764	0.559803	-0.419324	0.0638679	-1.00647	0.742969	0.484771	2.12927	0.544108	-1.99408	-0.569077	0.855014	1.50016	1.38795	1.83031	2.17727	-0.424727	2.21041	-0.0943085	-1.65767	-1.16269	1.68962	1.32118	1.17636	-0.115918	-1.0467	0.801278	1.9103	0.783069	-1.20048	1.67885	-0.571755	-2.2426
b0818	ybiR predicted transporter	-0.583499	0.564035	-0.513425	-0.220083	-0.822035	0.140467	-0.986632	-1.10693	-1.66109	1.87727	-0.32656	0.23374	-0.175978	0.0437415	-0.385859	0.425019	-1.62312	-1.5154	-0.407167	2.61408	-3.23841	-2.43649	0.364916	0.399952	0.759094	0.813571	1.23606	-0.938161	-0.0969378	0.439778	-1.01393	-0.787875	-1.20859	1.16975	0.934527	-0.711044	2.83048	0.650397	2.12851	-1.15545	-3.22788	-1.12936	-2.94878	-1.95604
b0819	ybiS conserved protein	0.722675	0.316242	-1.573	-3.99665	-0.284997	1.65529	-6.73731	-2.34842	-1.34299	1.19685	-1.85308	0.142591	1.07592	2.19018	1.41719	-1.4498	-5.46814	-4.91054	-4.24007	-7.61104	-1.44723	0.749689	1.5038	1.39122	0.531076	-0.764035	-0.436568	-3.18712	-4.61915	-2.84347	3.76763	3.24943	-0.156888	-1.10486	0.3721	1.43997	-1.63465	-3.09693	4.08272	-1.44717	-7.98444	1.81221	-6.63098	-4.69982
b0820	ybiT putative ATP-binding component of a transport system	-0.357444	0.3493	-0.329718	1.3825	LQ	0.574861	0.109303	0.0436624	LQ	2.58093	0.856284	1.12109	1.00853	1.18244	0.169594	-1.11189	0.35021	0.545249	-1.935	-1.91992	-1.36702	1.12747	1.08958	1.40349	0.892505	-0.71558	-1.07412	-0.317101	-2.7247	-0.828876	1.56802	0.714051	LQ	0.164719	LQ	-2.16272	-5.05491	0.697537	0.772817	0.155266	-6.90734	0.494392	-3.41177	-0.219742
b0821	ybiU predicted protein	-0.304687	1.14213	-0.365225	-0.353549	-0.18487	-0.232056	0.206057	-0.0917909	-1.16878	-0.02065	-0.401548	-0.202687	0.377355	0.00643913	-0.0519618	-0.564179	-0.7284	-0.823762	-0.590093	-0.996051	-1.63161	-1.14912	0.106539	-0.709184	-0.0563556	-0.96684	-0.662926	-0.975024	0.43834	0.311115	-1.82586	-1.40446	-0.566952	0.591504	-0.0653907	-0.446891	-2.00659	0.0270457	-0.618914	-0.39029	-1.14887	-0.364547	-0.991104	-0.713615
b0822	ybiV sugar phosphatase	-0.419479	0.49359	0.17755	-0.684265	1.05379	0.333434	-2.22256	-1.22323	1.47174	-0.305266	1.86345	0.766889	0.765797	0.882419	0.466684	0.130845	-1.42129	-1.62457	-0.7376	-3.25488	0.0195584	2.34906	2.26692	1.79044	1.58271	0.644828	0.5467	1.04635	-0.559557	1.70704	-4.30817	-2.81954	1.50091	1.39684	0.337216	-0.148845	-1.2436	2.75432	-0.481794	2.25178	0.300513	0.770951	-2.50567	-2.27012
b0823	ybiW predicted pyruvate formate lyase	-0.0653058	0.287504	0.224367	-1.15148	0.578737	-2.14219	-12.0612	0.00829787	-6.5922	-2.21196	-1.50668	-0.164741	-0.497916	-0.693878	-0.310584	-0.944071	-4.8424	-4.1332	-3.89712	-4.0279	-4.40946	-4.66899	-0.250899	-4.44495	-2.17033	-2.66353	-1.8633	-4.26966	-6.07599	-2.80689	-13.619	-13.0016	-2.65545	-1.36968	-1.94115	-3.27306	-0.841216	-3.10272	-6.6489	-3.05484	1.58588	-2.4216	-1.88596	1.75713
b0824	ybiY predicted pyruvate formate lyase activating enzyme	-0.800892	0.388374	3.73812	1.75641	1.52247	1.16285	0.200582	-2.79849	-1.81581	3.32173	2.275	0.0428878	1.07599	1.93195	2.53713	-0.589976	-1.8201	-1.4873	-1.3888	-4.57071	-2.59322	-2.25033	2.7877	-2.0547	2.07399	-0.69761	-0.445156	2.03902	-0.802905	-1.29195	-5.90291	-5.34373	-0.392889	0.832527	-0.332408	-1.03389	-5.01509	-0.470303	2.35425	2.7535	-4.07053	-2.26337	-2.12871	3.46003
b0825	fsaA Fsa	-0.637715	0.443405	0.113259	-2.90155	1.04089	0.740484	-2.36484	-1.212	-0.819163	2.4052	0.445544	-0.709795	0.47467	0.385529	1.08635	0.12957	-0.511497	0.16785	1.02196	-2.18996	2.1207	-1.46419	0.889417	4.18502	0.665029	0.315286	0.26537	0.629293	-2.19098	1.49513	-1.56713	-0.882694	-0.118293	-0.506532	3.06585	-1.47006	1.82104	3.44361	-4.87351	1.7936	-2.58018	-0.483084	1.43328	1.61862
b0826	moeB molybdopterin biosynthesis	-0.474758	0.513335	1.12483	-1.29323	1.04251	1.6224	-2.1223	-0.265037	-1.61	3.92103	0.0548549	-0.392349	0.144465	1.17443	0.680126	1.28228	2.794	2.4942	-0.277881	0.522548	3.6472	-2.79378	0.906941	2.07627	1.46311	1.08025	1.26841	1.93407	0.773301	2.00733	-1.01483	-0.160108	1.65044	-0.657257	-0.165609	0.648953	2.89574	1.32463	0.535648	-0.774219	3.46363	-0.485851	-3.45735	0.646933
b0827	moeA molybdopterin biosynthesis	-0.84877	0.799104	0.206812	-0.932371	0.192798	1.1336	-1.78633	-0.790628	-0.552093	0.908978	0.815067	1.04706	0.0492883	0.743813	0.402989	-0.117836	-0.700765	-0.244145	1.21584	0.867309	-0.912257	0.503424	0.350309	-0.678847	-0.317798	0.127176	0.197167	0.166281	1.33532	1.28882	0.610803	0.725875	-0.947691	-0.885237	-0.595918	0.042743	-0.379947	1.21284	-0.385418	0.248515	2.05924	0.758887	-1.50776	1.30927
b0828	iaaA beta; cleavage product of IaaA	-1.08326	0.674388	1.7532	1.92917	0.632153	1.66212	0.52369	0.0469499	0.45383	0.979515	1.93291	0.271404	0.242271	0.337117	0.41658	1.20949	1.53387	1.76265	0.733975	-1.59892	1.7957	-1.04842	1.88317	0.45817	1.17417	1.415	1.80238	-0.0937181	0.420326	1.51599	-1.70788	-1.7936	-0.579203	0.441144	-2.44371	1.30785	2.31841	2.53264	0.948156	0.518728	-0.578913	0.672828	-0.811326	-0.821213
b0829	gsiA gsiABCD glutathione ABC transporter	-0.76985	0.547808	1.12859	0.00415603	1.21217	1.34304	0.179487	0.989718	0.0301801	2.65144	2.21851	1.62609	0.854703	0.441806	0.688449	1.55803	0.385905	1.39239	-0.241881	-0.400916	-3.33139	0.427703	2.0608	1.09219	1.40893	0.779787	1.0207	0.959781	0.724359	1.04144	-2.58519	-1.48394	1.10552	0.645554	1.74602	0.959424	-0.571534	1.47457	-1.7822	0.323941	-3.96457	1.70835	-0.475365	1.87521
b0830	gsiB gsiABCD glutathione ABC transporter	0.242059	0.625181	-1.24007	-2.2894	-0.197552	0.285321	-4.64392	-1.60575	-2.25585	-0.318294	-0.533757	-2.78984	-0.658226	-1.86258	-1.98562	-0.856115	-1.65326	-1.59447	0.501005	-2.5932	0.576891	-3.69603	-0.0211929	0.1076	0.231066	-0.942473	-1.03309	-0.12308	-2.31595	0.0662402	-0.226673	-0.454408	-1.5219	-0.492601	-0.990828	-1.45559	-0.741847	0.236503	1.3677	-2.43708	-5.28745	0.466405	-3.76269	-0.0899622
b0831	gsiC gsiABCD glutathione ABC transporter	-0.761785	0.711566	0.175896	0.487587	0.281012	1.75977	0.0884625	0.956494	-1.86939	0.687539	1.7186	-0.454471	1.04444	0.434364	0.622349	1.25243	0.645844	0.659664	2.2841	0.809038	4.02528	-0.824589	1.89028	-0.84243	-0.700992	1.05052	1.15168	0.0300392	1.65447	0.169566	-1.25653	-1.48897	-0.541691	2.22206	1.19069	0.532575	-1.87547	1.70507	-0.59255	-0.193698	-3.53446	0.429148	0.936914	1.28144
b0832	gsiD gsiABCD glutathione ABC transporter	-0.32834	0.408533	-2.89521	2.40371	0.69127	-0.57557	3.0649	-0.727208	-0.60264	-2.71073	2.23971	-2.35207	3.09588	0.593654	0.63212	2.95448	-0.50818	-0.113653	-0.922256	-1.29757	-4.13493	-2.08119	1.47872	0.171558	2.12777	0.841087	0.387555	2.17404	-3.10424	0.550982	-3.70212	-3.86753	-0.992786	3.20104	0.0585896	3.96371	-4.88462	3.29181	-4.07904	0.445327	-6.80597	2.06778	1.37353	-0.0681464
b0834	yliF putative lipoprotein	2.71543	0.358942	-0.903816	-1.19538	-1.42481	-0.699729	1.19132	1.26297	-0.181558	-3.23339	0.375907	0.871986	0.614797	0.704409	0.176536	1.62329	1.17386	0.602381	-0.40374	2.57202	-1.63147	3.36196	0.435285	1.45455	0.779366	0.760281	1.00589	2.21004	2.62061	-0.540689	2.46996	2.62883	0.855332	-0.214946	-0.945835	2.27002	3.64637	0.690344	3.23503	0.366522	-7.17073	0.900909	2.15617	0.585027
b0835	yliG predicted SAM-dependent methylase	-0.0830345	0.200833	2.08071	0.458013	0.860577	2.8406	-5.43087	0.14968	-3.27006	-1.88665	-0.0163883	-5.85969	-0.0216386	-0.292303	0.543365	1.17901	2.50633	3.87362	-5.87193	-0.528115	4.91099	0.0111174	1.49745	-2.80426	2.42451	1.70039	2.10005	-1.57003	-1.30325	-1.57142	4.81918	5.34441	-2.52192	-3.63931	-2.9161	2.55343	-1.5485	3.25235	-3.49057	-2.13354	4.49704	5.95563	-3.38738	-0.990848
b0836	bssR regulator of biofilm formation	0.659573	0.445487	-3.38762	-3.65696	-1.95858	LQ	-3.64852	-4.16221	-2.92443	-0.501384	-1.63808	-3.63637	-2.47276	-3.08772	-2.83437	-2.88472	0.0287428	-0.410448	-3.49992	1.18723	-4.0515	-1.69561	-2.10379	-2.03292	-1.85845	-1.60914	-2.08509	-2.59106	-1.95881	-2.84825	-3.65099	-3.27388	-3.44681	-0.672725	0.140974	-1.81627	-5.30424	-2.44034	-5.40983	-2.45017	-2.06163	-2.26893	-0.0793567	-2.83843
b0837	yliI aldose sugar dehydrogenase	-0.55816	0.224641	-3.22093	0.846627	-1.36441	0.672431	4.27634	-4.59608	3.09425	0.414651	2.00076	1.84486	1.32793	0.899473	0.573524	-5.06815	0.876942	1.86062	1.95996	1.05905	3.5704	4.01969	4.05011	0.798912	3.002	3.09323	3.91886	-0.0428209	-2.46066	4.22789	-6.91742	-5.43966	0.713521	0.293022	-0.707497	3.09642	2.90199	2.05561	4.09426	2.3302	-0.671901	3.10163	-2.57718	-1.4003
b0838	yliJ predicted glutathione S-transferase	1.3907	0.693864	-0.467703	-2.21947	-1.48436	-2.11327	-4.43928	-2.37106	-4.41942	-3.31418	-0.750968	-2.33311	-1.38455	-1.45958	-1.74117	-1.99447	-0.376429	-0.609078	-3.99752	-4.2647	0.561161	-0.477662	-0.383653	-1.16789	-0.342782	-0.464573	-0.67722	-1.5645	0.0305026	-1.07161	-1.00754	-1.05787	-0.38654	-3.98034	-1.61678	-1.95039	-2.36585	-2.50234	-1.01912	-2.64781	-6.03637	-2.102	-4.16751	-2.14186
b0839	dacC penicillin-binding protein 6	-0.976704	0.576826	0.912734	1.42236	0.299953	0.931591	1.41566	-1.43851	-2.08698	-1.33718	-0.220087	-0.474562	-0.818388	0.584801	0.811638	-0.609715	-2.20365	-1.82956	0.185113	1.54411	-2.05941	0.678736	1.32162	2.8663	1.09417	2.1748	1.98043	0.736411	-0.818928	0.710516	-1.87688	-1.07339	1.31387	-1.52177	-0.834875	1.72972	3.69371	1.56677	1.50944	2.42228	-3.43178	-0.154188	0.0707408	2.21259
b0840	deoR DeoR transcriptional repressor	-1.21915	0.405648	-3.51973	0.0112713	2.89995	0.299599	-0.77159	-1.53707	-1.60555	-0.953667	0.384919	2.75003	2.9388	-1.22027	-0.139981	-1.531	0.0907629	0.267982	0.253169	-3.61822	0.669782	2.75331	3.47557	2.14336	1.46349	0.050933	0.474904	1.43162	1.01277	3.5481	-2.59899	-0.434774	0.801238	4.54548	6.00667	3.80133	-1.44762	2.39279	-3.04556	4.1115	-3.88558	5.37647	-2.60406	5.23423
b0841	ybjG undecaprenyl pyrophosphate phosphatase	-0.0987328	0.473108	-2.93973	-0.850198	-0.842375	-1.58722	-3.82669	-2.50709	-1.10479	-2.50848	-2.03795	-0.441796	-1.01759	-0.744821	-0.960985	-3.00374	-0.811494	-0.977041	-0.233993	-1.75476	2.29935	1.83907	-0.235631	1.2562	1.11677	0.711685	0.535724	-0.0427494	-0.779775	0.0610235	4.73674	4.17393	0.416952	1.78331	1.47883	0.382798	-4.27482	-0.83264	0.0893131	-0.104865	-1.00877	-2.5629	-0.260966	-0.0319221
b0842	cmr MdfA/Cmr MFS multidrug transporter	0.0606241	0.521991	-2.33613	-2.37112	-1.84945	-0.958978	-5.03534	-0.259313	-1.82076	-0.152512	0.149868	0.816495	0.920935	-0.317899	-0.554209	-0.873672	0.892206	1.0174	1.63661	-0.00349329	1.60448	-2.64886	0.486974	1.39579	0.67372	-0.587083	-0.470036	0.158963	2.07776	1.15209	0.248821	0.401786	-0.442456	1.23245	0.436037	-0.594175	-2.51316	-0.094564	0.670396	1.04024	-5.75036	0.313272	0.0110114	-4.66174
b0843	ybjH predicted protein	-0.351647	0.474635	0.993217	0.110155	0.269157	0.474725	-0.667771	1.69702	0.267983	0.325802	-0.0337767	0.286675	1.33444	-0.444289	0.888543	0.477017	-1.40222	0.454947	0.289154	1.30851	2.02592	-0.739868	1.26145	-0.692224	2.19056	0.777278	0.666483	0.619864	3.87582	0.6172	-3.24578	-1.01215	0.650479	0.112411	1.25507	-0.531959	-0.733216	1.57141	-1.74698	-0.558752	-2.30978	-0.335022	1.87864	-1.12332
b0844	ybjI FMN phosphatase	1.19471	0.201484	-3.44119	-9.34076	-5.63815	-0.573988	1.07462	-6.60991	-3.2231	-9.77497	-3.68357	-7.07289	-2.60133	-3.14036	-4.3608	-4.71918	-6.15337	-6.25598	-11.5707	-13.7592	2.86154	3.44119	-0.781655	-4.18537	-3.95932	-2.17794	-2.56058	-3.10052	-6.74597	-2.5085	-10.6075	-11.4625	-3.62249	-0.306262	-6.91581	0.086476	-2.43797	1.54562	-0.686472	-9.33239	-15.0798	-2.3037	1.5539	-8.70875
b0845	ybjJ predicted transporter	0.16349	0.480235	0.266931	-1.82021	-1.30734	-1.64725	-3.42769	-4.1237	-4.23419	-4.20531	-1.51973	-0.801436	-0.43712	0.823302	0.828664	0.125985	0.582484	0.97225	-2.79157	-1.84801	-1.89973	-3.73858	1.0954	-0.405643	-1.52469	0.460256	0.32777	-1.82017	-1.83083	2.21963	-6.87112	-6.28113	-1.87138	-1.2441	-2.22505	-1.16076	-2.3785	0.56219	-2.40401	0.560511	-5.71598	-2.45288	-0.506018	-0.430341
b0846	ybjK predicted DNA-binding transcriptional regulator	-0.940629	0.39392	-0.905773	2.36236	-0.0107616	1.70795	-1.6051	0.36311	0.459628	0.537319	1.3469	2.27769	1.17345	0.902543	0.865959	3.1674	1.91594	1.88187	1.25262	-1.88432	2.49593	-1.32591	2.92216	1.58934	0.655929	1.19024	1.85214	0.90445	2.63138	1.91622	-2.39248	-2.05125	-0.630373	1.76766	-0.429663	0.0920937	-1.84116	1.83954	-0.87091	2.55436	-1.28978	3.27368	-0.360425	1.86538
b0847	ybjL predicted transporter	0.301986	0.288217	-8.42471	-2.69142	-2.62514	-1.5657	-7.00962	-2.93208	-3.34112	-4.65331	-0.0823849	-5.56363	-2.18912	-1.88275	-1.9948	-1.91118	-5.50108	-4.55276	-3.50531	-9.53639	-2.97315	-3.81741	-1.73396	-2.91101	-2.73397	0.331403	0.884825	0.234348	0.144785	2.91362	-7.61682	-6.153	-2.19993	-2.72619	-2.84878	0.236632	-5.17842	0.276909	-5.54474	-1.46798	-6.28832	0.116562	-3.59424	-1.33221
b0848	ybjM predicted inner membrane protein	0.939988	0.485843	-2.9126	-2.88494	-1.34786	-1.64738	-2.56326	-0.58152	LQ	-3.84535	-0.374296	-2.12375	-0.987396	-0.457024	-0.910202	-0.335341	-0.191847	-0.49223	-1.42618	-3.34248	-2.86397	-1.47043	-0.460576	0.0470555	-0.215683	-0.891395	-1.0392	-1.08226	-1.90382	-2.04602	-4.42848	-4.41769	-0.390007	0.345457	-0.233819	-1.68314	0.705752	-1.16847	1.82049	1.23721	-3.22808	-3.28193	-0.448303	-2.25844
b0849	grxA oxidized glutaredoxin 1	1.36102	0.790836	-2.85916	-1.92118	-0.72522	-2.01612	-2.79189	-0.816254	-1.46844	-2.17229	-1.02724	0.272497	-1.9102	-1.85583	-2.03069	-0.171277	0.104113	-0.598758	-0.842358	1.49812	-2.75126	-0.712624	-1.26994	-1.74949	-1.08555	-0.383418	-0.871632	-0.950955	-1.89133	-1.98805	-2.10782	LQ	0.336219	-0.958362	0.0771724	-1.39239	0.00544743	-1.38182	1.80166	-0.0647479	-3.0604	-2.78877	-0.4075	-2.82129
b0850	ybjC predicted inner membrane protein	0.63304	0.657961	-1.06775	-0.8435	-1.15794	-0.749677	-3.10561	1.70357	-2.41866	0.755312	0.0514424	4.28046	-0.487569	-0.407939	-0.207253	-1.7609	1.00033	0.44608	-1.68305	-0.108886	-0.587191	0.0349083	-1.03685	-1.42467	0.817632	0.267221	-0.0786648	-0.664473	-1.53471	-1.44258	-2.07536	-1.86255	0.398583	0.859112	1.5989	-1.41656	-0.000792801	-0.531276	4.65199	5.22734	-2.78019	-1.81229	-0.123442	-2.95661
b0851	nfsA NADPH nitroreductase	-0.00684638	1.02852	0.487516	-0.330613	-0.51616	-0.78528	-2.16575	-1.09359	-0.500853	-1.04045	0.245952	-1.07004	-0.0184443	-1.45509	-1.19557	-0.671369	-0.44828	-0.31239	-0.565412	-1.11888	-1.24567	-1.04537	-0.229881	-1.11098	-0.734281	-1.19452	-0.85801	0.166665	-1.33489	-0.651781	-2.37285	-2.07629	-0.539878	-1.35806	1.10779	-0.353648	-0.918818	0.323442	2.24322	3.34764	-2.46727	-1.26664	-1.26722	-1.59867
b0852	rimK ribosomal protein S6 modification protein	-0.613868	0.307432	-2.86046	-2.48813	-0.869638	-0.777419	-3.77109	2.5662	-4.51213	-1.04742	-0.812611	-1.39238	-1.23829	-2.65713	-1.23698	-0.992912	-0.599178	1.07674	-1.69563	-5.12679	-0.269289	-3.23271	1.70092	-3.47766	2.22928	-1.62658	-0.407523	-1.07185	-1.21114	-0.72161	-4.98188	-4.92494	0.430351	-3.44026	-4.75935	-3.3208	-5.04427	1.70556	-2.23442	2.27751	-5.65267	-0.548799	-2.39335	-0.687489
b0853	ybjN predicted oxidoreductase	0.810475	0.644205	-4.19539	-2.03184	-1.79582	-2.58193	-3.35503	-3.20677	-3.67684	-3.18107	-0.882899	-3.11617	-1.50985	-3.85511	-3.66103	-1.84914	1.71376	1.8092	-2.75982	0.860689	-3.92628	-4.50662	-0.178675	1.64854	-0.33643	0.00406917	-0.00677656	-0.930426	-3.10588	-3.05906	-0.166447	0.117847	0.522836	0.879711	-1.12165	-0.942134	-4.87123	-1.57374	2.85455	-1.02183	-5.06347	-2.87862	-0.288684	-3.18835
b0854	potF putrescine ABC transporter	-0.731185	0.538342	0.991851	-1.21374	-0.787649	0.554897	-0.838881	-1.90749	-2.06536	-2.7636	0.502365	1.51998	0.787247	-0.14622	0.023861	1.23735	-0.249981	0.272216	-2.70867	1.29656	-5.08043	-2.79643	-0.0336596	1.44259	-0.237368	-0.405504	-0.516785	0.0012947	-1.02344	0.358461	-2.15653	-2.28236	0.0603337	-3.65673	-3.26806	1.32136	-5.18545	-0.820819	-1.22545	1.87264	-5.35362	-3.53853	-1.26535	-1.84998
b0855	potG putrescine ABC transporter	-1.24261	0.598691	0.998975	0.646061	-0.0608887	2.10473	1.55207	-0.780803	-1.77277	0.161678	1.47713	-0.175821	1.68029	2.09358	2.11997	0.326332	-1.16358	-1.2944	-0.698624	1.06645	1.37957	-0.543646	1.81573	-0.323173	1.03408	1.47358	1.9624	0.100809	2.30278	-0.174715	-2.08714	-2.69477	-0.651842	2.22209	-2.57674	0.614219	-0.657518	1.16289	-2.33014	1.88001	-2.55773	-0.435683	-0.585315	2.29256
b0856	potH putrescine ABC transporter	-0.420145	0.26469	5.05469	2.59514	2.22788	-0.122199	-2.87666	0.217467	-6.14496	-2.08167	2.82151	6.72247	2.60807	3.91757	2.67664	5.98705	4.46511	4.32998	0.875535	-6.18544	-2.29946	-3.45808	2.96038	4.41943	4.71581	3.00174	2.53195	1.66568	-5.77558	4.12864	-5.59668	-7.17892	6.01314	8.73447	-1.50701	5.34595	3.34053	-0.655857	4.89639	5.1133	-8.6303	3.09567	7.56308	5.91656
b0857	potI putrescine ABC transporter	-1.08273	0.479639	-0.838243	-0.640931	-0.683807	-1.88553	3.19824	-0.263935	-4.41262	1.96436	2.0022	-1.58285	0.861515	0.650483	0.636273	-1.57264	-3.31902	-2.82937	-1.36084	0.0554425	-3.13764	-4.63999	0.869451	0.564894	4.45934	0.870005	1.94221	-2.77136	-2.06107	3.6787	-3.83952	-3.89869	1.31983	3.72053	-1.25956	0.954371	-3.49842	-1.45281	-4.31599	0.206292	-2.35711	-0.687931	-0.580556	-1.0557
b0858	ybjO predicted inner membrane protein	-0.0811135	0.73791	0.549639	-0.713658	1.11652	0.695423	0.862943	0.862903	-0.72644	0.00140067	-0.180971	1.08534	-0.315461	0.913797	0.870498	0.807536	2.06022	2.30609	2.27797	-2.67391	0.374986	-1.54072	1.04057	0.584801	2.01105	-0.30329	0.0728422	-0.881823	-0.182814	1.62577	0.69509	0.247509	1.0508	1.86353	0.0795651	-0.0627313	1.90063	0.371242	-1.06072	-0.513145	2.36129	2.73757	-1.23754	-1.88365
b0859	rumB 23S ribosomal RNA 5-methyluridine methyltransferase	-0.467304	0.482	1.33544	-0.459856	0.57289	1.05374	1.80537	1.57049	-1.0704	0.466106	0.515092	-2.50167	-1.4337	0.657621	0.563458	-0.719361	-2.18863	-1.0487	-2.17749	-4.77817	-0.765769	-3.03249	0.63294	-0.254447	0.183358	-0.631534	-0.261978	-1.21127	0.275145	-0.813448	-3.70677	-3.89541	-1.75609	-2.90225	0.256015	-2.3133	-0.579857	-1.63609	-4.81978	-0.979561	-4.25093	0.62501	-1.69925	0.203885
b0860	artJ arginine ABC transporter	0.0649006	0.84476	-1.55735	-1.69421	-0.815214	-0.106722	-2.23803	LQ	-0.533006	-0.607032	-1.23902	-1.95903	-0.539899	-1.31656	-1.08755	-1.90988	-1.30702	-1.08995	-1.70741	-2.46282	-2.26126	1.2977	0.223779	1.37892	-0.326713	-1.10712	-1.21427	0.332697	2.72679	-1.57886	-3.32756	-2.84926	-2.28961	-1.46923	-0.997839	2.00396	-2.66631	-0.65718	-2.43552	-2.0053	2.01265	-1.42833	0.441933	0.522849
b0861	artM arginine ABC transporter	0.400398	0.589094	-0.406577	-2.59291	-1.7423	-0.747435	-4.52132	-3.62209	-3.15469	-0.0993773	-0.57919	-2.32012	0.142299	-0.140494	-0.567016	-0.141842	-3.10572	-2.96383	1.22212	-3.03472	0.589984	-0.977745	-0.263307	-2.10746	0.192497	-0.873295	-1.38572	-1.16426	-0.772763	-0.874644	-6.00397	-4.91112	-1.68791	-0.384271	-1.93571	-0.787985	-4.34194	-0.410715	-4.86534	-0.447086	-5.53215	2.74185	-1.70879	-2.44926
b0862	artQ arginine ABC transporter	0.0183327	0.679439	-3.47222	0.577045	-0.248898	-1.78755	-3.882	-2.72809	-3.78658	-1.94271	-1.42986	2.50015	0.29735	0.449196	0.626023	-1.07166	-3.37692	-3.11509	-1.99523	-3.27314	-1.56627	-3.44855	-0.711638	-1.53201	0.68391	-1.17676	-1.03804	-1.88207	2.38973	-2.0701	-3.84459	-3.49463	-0.841956	-1.65402	0.396747	-1.16666	-4.33362	0.544921	-2.95541	1.47729	-4.11696	-1.50396	-0.944266	-2.44685
b0863	artI arginine ABC transporter	0.470986	0.414996	-6.35929	-0.173399	-0.655178	-0.767614	-5.73155	-1.66851	-2.77452	-3.72841	-1.7031	0.893735	-2.36185	-3.34873	-3.64708	-1.23887	-2.72661	-2.9481	-5.72694	3.31831	-7.72791	-0.665816	2.1024	1.68494	-1.00201	0.0449332	-0.197014	-1.14965	3.43593	-3.87596	-9.14175	-8.03016	-1.84856	-5.68049	-1.40941	1.05965	-5.33135	-0.0359201	1.32441	-4.13257	-8.44148	2.42913	-7.03853	-6.78956
b0864	artP arginine ABC transporter	-0.340491	0.283114	-1.15231	-5.27475	-4.88186	-0.0219066	-9.35466	-3.55081	-5.75757	-4.88751	-1.19558	0.604661	-2.15835	-2.68654	-3.43181	-3.23032	-6.38188	-5.35656	-4.51733	-7.66961	-1.94985	-3.83086	0.513134	-0.775428	-4.3463	-2.75954	-2.35984	-0.492993	-3.4993	-1.35434	-9.29329	-8.61566	-1.42603	-6.50878	-1.72959	0.38378	-1.36179	0.461012	-2.043	1.6031	-9.08092	1.79559	-2.68092	-1.32021
b0865	ybjP predicted lipoprotein	-0.131507	0.334877	-1.9694	-4.8622	-1.34201	-1.03916	-6.40037	-4.94492	-0.935318	-3.9155	-2.48707	-2.22793	-1.66989	0.662054	-0.99515	-3.96384	-0.753627	-0.542592	1.53099	-8.75867	-2.9406	-5.69564	1.86187	-2.20763	-1.04357	-3.30186	-3.13733	-4.85339	-3.9866	0.120982	-4.68436	-5.77734	-4.05211	-4.82227	-4.93273	-1.56649	0.855391	1.04355	-7.33	-2.11618	-8.06908	-0.805785	-2.64289	-2.30606
b0866	ybjQ conserved protein	-0.143869	0.493493	-0.701087	-1.19913	-0.337145	-0.571005	-2.09467	-1.43593	-1.7412	1.11993	-0.501379	1.70481	-1.4276	-2.08831	-1.02987	-1.03692	-2.0436	-1.51351	0.750228	-3.08303	-0.528848	-2.16399	-0.348398	-0.925749	-0.753172	-0.848484	-0.484152	-1.7195	-0.243015	0.77078	-2.23945	-2.32692	-1.45616	-1.75818	-1.46416	0.747713	3.42612	0.38512	-1.90176	-0.848594	-2.82628	-0.769264	-0.733439	-1.5797
b0867	amiD anhydro-N-acetylmuramoyl-L-alanine amidase	-1.21894	0.455728	1.48354	1.97739	0.0477164	0.373769	-4.36193	-0.0268205	-1.86678	3.4107	0.49199	0.888166	-1.11813	0.733419	0.869184	-2.93914	-0.447523	-0.295298	0.636616	-2.60963	-1.61035	1.64711	1.31529	2.97426	1.67232	-0.662466	-0.759547	0.0864372	0.350337	2.96069	-1.90425	-2.12742	-1.45068	3.20097	-0.359942	1.10988	4.10383	1.7653	-1.86733	1.20686	-1.56421	1.29495	-0.798223	2.12936
b0868	ybjS predicted NAD(P)H-binding oxidoreductase with NAD(P)-binding Rossmann-fold domain	-0.509106	0.631555	-1.57061	-0.304063	0.704503	-1.16018	-3.76241	1.06846	-3.04784	1.11688	1.13357	-0.355069	0.891685	1.2414	1.12854	-0.355662	-1.31873	-0.527467	-4.60784	-5.82482	-0.349316	0.458614	0.0364047	2.12871	-0.734526	-3.06563	-2.44745	0.440724	3.41971	-0.464159	-6.03719	-5.8044	1.98485	2.86599	1.42949	0.558737	-4.9566	-0.844894	1.70883	1.60556	-0.249002	0.681664	-0.759845	-0.266915
b0869	ybjT conserved protein with NAD(P)-binding Rossmann-fold domain	-1.66863	0.951159	-0.166525	0.491126	0.855459	0.456729	-1.78992	1.1925	-1.01453	1.5421	1.05056	0.600191	1.47635	1.88356	2.01742	1.28031	0.53541	0.485571	1.73741	-1.74942	-0.492062	-0.23025	1.32268	1.93647	1.10274	1.17925	0.978974	0.207812	1.0228	1.86378	-0.497529	-1.73748	-0.12986	1.04855	0.929693	0.371017	-1.62472	1.43397	-0.881278	1.61275	-1.22478	0.973258	0.71917	0.377363
b0870	ltaE LtaA	-0.893968	0.779612	0.646661	-0.0399613	0.649349	0.171751	-0.103874	-0.578444	-0.565648	-1.12602	1.69894	2.51276	1.33892	0.794839	0.802254	0.986043	0.784079	0.731337	0.612772	-1.18586	0.382924	0.74856	1.41856	0.789506	0.540283	1.61515	1.85877	0.11397	2.86101	1.82461	0.0204273	0.320322	1.04525	1.64222	1.13637	1.2104	-3.18651	1.52981	1.43464	0.482434	1.88272	-1.16658	0.592997	1.40872
b0871	poxB pyruvate oxidase monomer	-0.301727	0.31014	-2.38188	1.56712	-0.0286446	-0.88674	-2.39354	LQ	-3.53133	1.07594	1.21395	2.3931	0.787862	0.0980064	0.704876	0.40196	0.250669	0.585587	-4.98985	-7.28076	-0.492434	0.766633	0.592563	2.81852	0.615408	1.27854	1.04276	-1.89971	1.72811	-2.12459	2.02281	2.65691	1.23345	0.760657	2.00707	-2.29108	-8.84649	-3.5294	1.35246	-0.89008	-2.34676	-3.44648	-4.82399	-2.36311
b0873	hcp hybrid-cluster protein	-0.57848	0.304283	2.3614	-1.15296	0.910776	0.74992	-7.72483	-3.53554	-3.1568	0.618818	0.540438	3.93421	1.62697	1.58549	2.20054	-1.42665	3.31556	3.86901	1.74094	-1.49249	1.24645	0.200594	2.10159	-1.92491	2.39569	0.142568	0.903129	-0.315998	3.32096	3.57385	-2.7687	-1.12515	-0.946079	0.40954	0.11402	1.25955	-7.47167	-0.154776	4.29637	1.6055	3.67349	3.21154	-3.03064	0.832364
b0874	ybjE predicted transporter	0.652694	0.483011	2.15802	0.224273	0.434321	-0.119013	-5.03772	3.00252	2.17095	-0.301205	1.40546	1.75345	1.17666	0.221962	-0.102304	1.20335	4.00807	3.4066	1.02368	2.59404	5.01372	3.05578	1.18434	2.03088	1.94531	1.932	1.23797	0.333235	-0.393745	-0.258998	-1.60985	-2.4275	1.55425	2.63301	1.42284	1.33646	2.37066	-0.080957	-1.63295	2.28363	-7.51809	0.673695	2.22741	-2.05828
b0875	aqpZ AqpZ - water MIP channel	0.449047	0.406901	-2.70606	-0.168942	-4.25824	0.642032	-0.764377	-5.07088	-3.52388	-3.27888	0.161454	1.08378	-1.61246	-1.28017	-1.65637	2.01259	0.66061	0.197658	-3.80493	0.649928	-4.44543	-2.52209	0.736472	0.219211	-2.91729	-0.629345	-0.405424	-1.25339	-3.87939	-1.34842	1.48994	1.72471	-3.65805	-3.18694	-1.90274	2.52861	-3.19784	1.29801	-4.8951	0.290236	-2.62289	0.955502	-3.18505	-0.810698
b0876	ybjD conserved protein with a nucleotide triphosphate hydrolase domain	-0.867002	0.631383	1.80314	0.2765	0.253505	0.658331	1.18645	1.4072	-0.390588	-0.247312	1.14103	0.51825	1.2479	1.45534	1.54141	0.994373	0.8584	1.02485	0.41135	-0.671497	-0.654618	1.19673	1.1006	0.483873	0.40495	1.02238	1.33794	0.482928	-0.507567	0.0235463	-1.92183	-1.17364	0.496068	1.0958	-1.23846	1.40188	-2.16277	0.457936	-0.182376	0.858391	-1.92645	-0.22621	0.863583	-1.54528
b0877	ybjX conserved protein	-0.0842311	0.710732	0.172757	-2.06798	0.0485145	-0.315613	-1.40337	-0.652279	-0.0591986	0.346904	-0.89762	-0.530747	-0.252506	8.67822e-05	-0.190088	-1.44893	0.915064	0.621174	-1.64995	-3.41458	-0.223526	-0.976604	0.0906344	-0.515471	-0.0404139	0.494464	0.365023	-1.01217	-1.50599	0.776582	2.19934	2.11236	0.14638	0.417	-0.696554	0.0995728	0.23862	1.40188	-3.12247	0.74361	-3.57268	0.503222	-1.89589	-2.45832
b0878	macA MacAB-TolC Macrolide Efflux Transport System	-0.725708	0.892096	1.60068	-0.0275793	0.0316609	0.102942	-1.35653	0.00242652	0.414003	-1.08857	-0.402338	-1.3677	1.20549	-0.433293	-0.68609	0.160127	-1.09336	-1.12728	-0.531025	-2.66089	-2.23095	-1.13434	1.36884	-2.13274	-0.971817	0.00244883	0.0143963	0.44364	-1.24997	-0.934768	-2.01184	-1.85777	-1.33376	1.27889	-1.2805	-0.411232	1.37622	-0.0139694	-2.02971	-0.145412	-2.78939	-0.638932	-2.09129	0.796062
b0879	macB MacAB-TolC Macrolide Efflux Transport System	-0.898715	0.541003	1.25666	0.180321	1.39794	0.128953	0.973791	0.25572	-1.25062	0.825524	1.1801	2.7648	0.788458	1.56826	2.00168	0.993405	-0.0287299	-1.20229	-1.16562	-2.78455	0.997528	0.220455	1.06522	0.564116	0.445113	0.301088	-0.150937	-0.775332	-0.603232	0.581974	LQ	-2.97632	0.740529	0.239637	0.580291	1.00123	-3.87531	-0.82008	-0.161587	0.85222	-3.08118	-0.743225	2.02292	-0.69
b0880	cspD DNA replication inhibitor	0.278215	0.39027	-3.48732	-1.17441	-0.546697	-0.896015	-3.67876	-2.54901	-1.57609	0.994427	-1.6244	-0.606663	-2.31678	-1.45832	-0.770605	-2.43521	0.527522	LQ	-0.889345	-3.20527	-3.90459	-2.7357	-0.191357	-1.50936	-0.333088	-0.335497	-0.559164	-2.27747	-0.851885	-0.805356	2.0158	LQ	-3.12106	-1.49272	-2.44967	-0.308279	-2.88919	-0.0234229	-2.43055	-0.676131	-3.33089	-1.16966	1.56849	2.32698
b0881	clpS specificity factor for ClpA-ClpP chaperone-protease complex	1.35911	0.673026	-1.5419	-1.58713	-1.46186	-2.04269	-4.2719	-2.06959	-2.51853	-2.76172	-0.633577	1.42874	-3.39889	-2.56838	-2.53971	-1.78311	-3.47602	-3.00259	-1.92876	-3.82159	-4.40721	-0.307263	-1.55591	-0.75702	-0.117754	-1.76571	-1.56139	-3.48717	-0.0857959	-2.02391	-3.83599	-3.34993	0.426575	-1.64404	-0.572345	-2.70756	0.421065	0.0352247	1.04926	-2.25706	-3.75616	-3.37508	-1.28854	-3.85243
b0884	infA protein chain initiation factor IF-1	-1.77894	0.448759	0.622492	2.66481	1.27117	3.70345	1.29127	LQ	1.40767	3.74105	1.02932	3.86091	0.620955	2.51407	3.15692	1.48864	2.50615	4.29303	3.41111	1.7666	0.230839	2.10342	3.68381	2.42797	3.37942	2.8264	3.16336	1.25921	3.8116	4.03448	1.06064	LQ	1.47776	2.52904	2.55024	2.59581	1.58207	4.53622	1.83358	3.95993	1.7205	1.06072	2.04162	3.42489
b0885	aat leucyl, phenylalanyl-tRNA-protein transferase	-0.609047	0.527075	1.95081	1.47051	0.100208	0.735776	3.54849	-0.0530289	-2.98528	0.501176	0.237879	2.46472	0.763309	0.26836	-0.13506	1.07792	3.54255	3.07444	1.25325	-3.13281	-0.695113	1.93578	1.1578	1.04387	2.09493	1.08681	1.08608	-1.66842	1.12982	0.510671	-4.54326	-4.28227	0.398897	1.4434	1.92143	-0.323156	-4.24302	1.4869	-3.70547	0.495068	-3.43052	2.00204	-3.18928	1.69627
b0886	cydC cydDC glutathione ABC transporter	-1.97746	0.638696	-1.485	-0.399892	-1.28009	-0.0633566	-0.318377	0.0912554	-2.41863	0.0461714	-0.885716	0.655679	0.126064	0.635559	0.0377072	-0.698017	0.313585	0.640013	0.403146	-1.3083	-2.27371	-1.59273	0.960313	-1.95646	1.20952	0.889202	0.855377	-2.35903	0.423245	0.607421	-1.27607	-2.47971	-0.731648	-1.07031	-3.11729	0.0655164	-1.88656	1.02594	-2.23249	1.14728	-1.79122	-1.67189	-0.309425	-0.766784
b0888	trxB thioredoxin reductase monomer	-1.68702	0.526059	2.2323	-1.55732	1.35404	1.56134	-1.42457	0.492508	0.765474	0.35015	4.76041	4.09296	3.60531	3.07247	2.80637	10.0969	8.41541	8.53466	4.67775	4.11505	3.41699	4.65104	1.49041	3.68437	1.59359	2.64251	2.64514	4.53715	4.41913	5.47866	6.09595	6.56073	-0.307067	-1.02044	0.940156	0.0131331	-2.32912	0.784958	-4.03182	0.656869	7.16999	1.14489	3.21345	0.309579
b0889	lrp Lrp transcriptional dual regulator	0.109225	0.452353	-0.53708	0.525195	-0.397106	-0.559471	-0.609498	0.475686	0.186556	-0.736892	1.25073	-1.9845	0.167753	-0.820539	-1.25643	2.57132	3.73726	3.0834	0.870037	-0.464383	-0.603138	1.86324	-2.0201	-0.938088	-2.96272	-1.2388	-1.64297	-0.0798871	2.29802	0.399462	-1.25305	-1.13865	-0.41048	-1.80656	-1.59321	-4.4919	0.873212	6.56007	-4.74555	-0.709457	-3.91663	-1.62259	-0.487631	3.70139
b0891	lolA periplasmic chaperone, effects translocation of lipoproteins from inner membrane to outer	-1.19034	0.353398	-1.30911	-0.451756	-1.50672	-1.95971	0.0801783	-2.69091	-3.7558	-1.07151	1.56521	-1.98711	-2.05932	-1.92114	-1.0373	0.0968482	-3.269	-2.70169	-2.09046	-5.15627	-2.76251	-2.80728	-0.601169	-4.13741	-0.661761	-0.801631	-0.798849	-0.949694	-2.68222	0.512606	-0.985207	-0.111425	1.68235	-3.54444	-1.2713	-2.33515	-4.71851	-1.4466	-3.3959	-1.21055	-3.70144	-1.04553	-3.33836	-1.43921
b0892	rarA recombination factor	-1.0551	0.38764	2.63357	-0.764572	1.43205	0.491522	1.36122	0.949717	0.379135	1.32226	1.55957	-2.05521	1.25959	0.741654	0.453314	1.02667	-2.38526	-2.62603	3.74937	-2.95314	0.49506	-2.9542	2.59067	-2.86503	2.00159	0.117821	0.445325	1.18453	1.16249	1.96691	-2.16019	-1.70643	-1.80029	-1.92834	-0.173586	1.83829	-0.848661	0.0647392	-3.55393	1.29431	2.51073	3.73646	-2.72284	-0.729016
b0893	serS seryl-tRNA synthetase	-2.80785	0.494057	-0.505433	0.856796	1.3989	2.15777	-0.602553	1.00841	-1.16668	1.16964	-0.26336	1.7565	0.253549	1.60405	2.19919	-0.0173815	0.43447	0.536741	3.65904	-0.784692	-1.84808	-0.99853	2.52686	-0.283794	1.80671	1.81307	1.73802	-2.0051	1.73346	1.94404	2.08007	2.23567	-0.921441	1.63241	-0.207066	0.0526102	-0.956028	2.00566	-0.697968	1.71261	-0.221096	-0.296497	2.81176	1.41725
b0894	dmsA dimethyl sulfoxide reductase, chain A	-0.713166	0.68847	0.343204	-1.49716	-0.181608	0.366248	1.23916	LQ	-2.48134	-0.667573	-0.224524	-0.867235	-0.345038	0.149652	0.478899	0.288475	-0.105042	-0.0600621	0.581094	-0.696217	0.042774	-1.41501	0.737969	-0.100994	-0.134418	-0.759642	-0.537365	-0.845806	0.855849	0.922101	0.212565	0.729738	-0.108882	-0.744344	-0.457754	0.555682	-0.231067	0.52864	-0.945918	1.19263	-3.42826	0.0143606	-1.62236	-1.74622
b0895	dmsB dimethyl sulfoxide reductase, chain B	-0.332975	0.552664	-0.0292019	0.646246	-0.256871	0.673717	-2.09575	-2.49085	-1.1437	-0.752699	0.679109	-0.92174	0.946955	1.12337	0.795698	-0.875163	1.84975	1.6487	-1.30411	-4.06429	-2.42023	-3.19586	-0.486398	0.3523	0.218069	1.02207	1.04376	-0.253389	-0.974548	-0.588875	-0.116758	-0.16115	-1.84771	-0.132957	-0.471663	-1.14225	-0.346786	0.602458	-2.38705	0.764704	-3.97884	-0.864222	-2.44739	2.01164
b0896	dmsC dimethyl sulfoxide reductase, chain C	-0.581782	0.45751	-1.25397	-1.59331	-1.58795	2.06353	-4.11981	-0.247881	-3.01669	-1.47192	0.501621	-2.48208	0.717527	1.99793	2.37723	-0.767016	-3.54478	-3.21169	0.421302	-5.79826	4.75582	-3.04369	0.905148	-1.37155	-1.19005	1.81109	1.74812	1.72079	-1.90823	2.30901	0.472663	-0.643759	-0.322147	2.55693	0.0148669	1.24873	-1.96003	2.46215	-1.55513	0.595407	-6.29163	0.556122	0.0613411	0.161427
b0897	ycaC predicted hydrolase monomer	0.0727795	0.490623	-0.208908	-1.4663	-1.46962	-0.491224	-3.59164	-1.78359	-2.54391	-0.713411	-0.782612	-1.33385	0.899668	-0.367575	-0.0829564	-0.643409	-2.95753	-2.35506	0.55269	-0.938302	1.73616	0.209856	0.351643	-1.45197	-0.634238	-0.264415	0.0892964	0.165809	-0.803441	2.43349	-0.0799737	0.144241	-1.62674	-1.38116	-0.198712	-0.736779	-0.842485	0.289034	1.73801	-0.563275	-3.43931	2.49896	-0.515945	0.967313
b0898	ycaD YcaD MFS transporter	-0.257351	0.636522	1.17626	-1.3495	-0.281469	-1.0463	-2.25754	-1.19118	-3.20134	-1.08449	0.264389	0.834079	0.115177	0.0687208	0.191216	-0.752363	-0.898854	-0.654031	-0.923673	-2.19997	1.34269	-0.191423	0.931955	1.35466	0.988128	0.954781	0.785127	0.580312	-0.254668	-0.70411	1.53768	1.89378	2.32694	2.56123	2.40106	1.44742	-2.87501	1.00849	-2.13053	0.726392	-0.745818	1.34341	-1.42321	-0.381807
b0899	ycaM YcaM predicted APC amino acid transporter	1.49569	0.272126	0.515411	1.54759	-0.891309	-2.54032	0.182061	1.59781	-7.65448	-9.55091	0.211029	0.987048	-1.61226	0.48621	1.88219	-0.878432	-1.38319	-1.54563	-0.040309	4.74035	3.09635	1.90004	-0.925836	-1.12176	0.926601	-0.407593	0.268193	-0.633735	1.38129	1.34198	-3.65194	-3.69273	1.92746	1.73486	1.14233	0.282695	-2.91993	-0.0226845	-0.465393	0.503611	1.10187	-3.08751	-0.200313	-2.96801
b0900	ycaN putative transcriptional regulator LYSR-type	2.96769	0.739944	-1.89528	-0.640957	-1.71705	-2.4485	-1.75944	-0.503997	-4.19412	-4.1565	-0.727779	-0.108882	-1.23143	-1.29539	-1.21919	-0.254825	-0.238444	-0.0797569	-0.867226	0.0936275	-1.69284	0.907199	-1.16491	-1.15331	-1.08604	-0.759627	-0.78304	-0.149057	-1.93722	-1.38225	1.37538	1.72149	0.319299	-0.457195	-0.36001	-0.199725	0.473642	-2.55133	0.460514	-0.787432	-0.28233	-1.5708	-0.450564	-1.33611
b0901	ycaK YcaK	3.08623	0.287051	-3.5042	-6.40391	-5.41507	-5.2988	-8.97488	-2.89212	-6.03004	-9.92579	-4.72587	-2.27329	-2.5373	-4.24707	-4.79111	-2.24875	-4.49483	-6.14561	-3.37879	-3.39248	-4.86797	-2.2176	-4.8651	-4.24374	-5.94827	-3.53146	-2.3986	-4.20847	-2.73447	-3.21871	-10.7135	-9.45104	-2.75918	-4.42183	-5.49281	-4.45907	-6.67516	-3.95714	-2.51687	-6.35735	-4.0214	-3.79261	-0.217943	-8.05744
b0902	pflA pyruvate formate-lyase activating enzyme	0.185183	0.440045	-4.15448	-0.451624	-1.45326	-1.41578	-5.43662	-0.951083	-3.6983	-3.28955	-1.03083	-1.64569	-1.45532	-2.38446	-2.17035	-1.16228	0.659748	0.570764	0.899596	-0.615308	-0.667599	0.0471197	-1.72379	-2.07672	-2.8292	-1.64009	-0.880488	0.187311	-1.24831	-1.2149	-5.17797	-4.06759	-1.68241	-0.265504	-1.79427	0.37274	-5.64486	-0.691261	-2.88304	-1.6478	-4.46593	-3.93547	-2.54255	-1.63878
b0903	pflB pyruvate formate-lyase (inactive)	-0.449689	0.514326	-3.54752	LQ	-0.937822	-1.37853	0.921014	LQ	-2.4047	-2.24795	0.76853	-0.468275	-1.67321	0.511373	0.464331	-0.484162	-1.50598	-1.35823	0.127453	0.717543	-1.51574	0.869904	1.28088	0.381481	-0.0168152	0.896904	0.809428	0.222363	0.421278	0.317154	-0.783216	-0.322687	0.180655	0.467929	0.570884	1.33628	-2.87328	-1.00732	1.78037	2.6633	-2.19439	-0.43493	-1.16461	-0.0897636
b0904	focA FocA formate FNT transporter	1.1699	0.196871	-11.0183	-5.3019	-3.19919	-2.79965	-9.40538	-6.34454	-10.0064	-10.0807	-1.89915	-7.23915	-3.49744	1.43257	0.554775	-0.758826	0.0877496	-1.40904	1.13557	-1.75516	-5.75145	-6.92572	-3.51601	2.96248	-5.38517	0.600794	0.860124	-2.66654	3.26273	-0.473264	2.46776	0.289875	-1.7067	-2.02392	-6.95435	1.46529	2.71645	-8.64908	-1.49156	-3.79673	-1.21787	-0.303368	4.48721	-4.26338
b0905	ycaO conserved hypothetical protein	0.453285	0.343713	0.613849	0.322928	-0.0504556	0.831504	-0.732369	-0.657461	-2.44968	-5.04225	-0.226043	-0.49906	-2.10096	-0.14144	-0.414077	1.00636	1.08666	0.817203	-2.07441	-2.49929	-1.52851	-0.123837	0.772988	2.37128	2.43783	0.0362884	0.411174	1.23902	-3.11865	-0.949984	-4.10795	-3.55457	-0.909921	0.809075	-2.393	2.57385	0.512661	1.02266	2.09812	-0.533144	-0.330015	0.193093	0.913305	0.472585
b0906	ycaP conserved hypothetical protein	-0.162738	0.684001	1.68178	1.55631	-0.809963	0.951588	-0.849603	-0.0778186	0.723177	-0.278648	-0.152019	-1.44386	0.088421	0.562741	0.337119	1.51023	-2.10248	-1.90556	-0.617871	1.2666	-0.698703	-1.52554	0.992001	1.10378	0.771577	0.209399	-0.0884307	-0.251787	-0.769172	1.28462	-1.04599	-0.927381	0.116673	-1.78258	-0.607524	-0.347303	-1.93724	0.379779	0.513586	-0.478244	2.4609	1.38234	-0.357574	0.261555
b0907	serC phosphohydroxythreonine aminotransferase / 3-phosphoserine aminotransferase	-0.363487	0.329228	-4.72012	-4.38012	-5.60159	-3.27131	1.36917	0.405513	-3.73532	-3.35428	-4.60595	-2.5319	-6.64177	-4.04928	-3.91429	-6.27494	-5.35083	-4.67724	-2.33128	-5.04146	-7.69018	-4.06532	-3.3575	-5.50246	-2.82936	-4.56743	-3.53144	-4.05322	-2.06284	-2.1723	-6.98664	-6.06205	-5.79513	-5.27112	-7.83927	-4.23804	-5.9069	-0.904552	-5.69268	-3.81092	-4.71494	-5.45019	-5.64357	-0.914557
b0908	aroA 3-phosphoshikimate-1-carboxyvinyltransferase	0.498175	0.343748	-5.95362	-7.16138	-4.75985	-4.48951	-7.83699	-3.61301	-4.27659	-3.78695	-7.55168	-3.10848	-7.30357	-6.10788	-6.20443	-7.74215	-1.28028	-1.53462	-2.807	0.806349	0.604739	-2.36055	-3.81247	-3.87456	-6.4003	-7.3607	-6.6438	-6.09314	-5.14327	-5.27757	-9.56344	-9.7147	-8.67823	-6.9185	-10.6358	-7.39726	-8.10757	-3.7951	-7.46399	-5.77182	-7.58226	-5.85426	-6.90374	1.28314
b0909	ycaL putative heat shock protein	0.380834	0.428647	-1.82291	-4.17388	-1.95307	-2.30364	-4.98081	-0.164456	-3.69838	-1.38346	-0.61363	2.4029	-2.56143	-0.873966	-1.50024	-1.54452	-1.86105	-1.88093	-2.23018	5.39242	-4.11378	-3.93242	-0.655611	-0.0504966	-0.0364706	-1.81812	-2.1344	-1.37019	0.938733	-2.7563	-5.97558	-6.68257	0.0785767	-1.45149	-2.44869	-2.28545	1.34363	-1.7564	-2.0321	-2.73175	1.49824	-3.45235	2.21003	-4.28555
b0910	cmk cytidylate kinase	-1.98847	0.482533	-0.893031	-1.74874	-0.640369	-0.351128	-0.494715	0.480529	0.839053	-0.114441	-0.15964	0.966235	-0.52943	1.24312	1.0257	-0.825174	-1.46499	-0.989871	-0.515203	-0.578304	-1.60801	-2.22304	-0.266184	0.0138454	0.33807	-0.985598	-0.308735	-0.127865	0.625566	-0.23286	-3.22723	-2.69015	-0.465237	2.74385	-1.66783	-0.459828	-1.5735	0.483936	-1.93507	-0.627757	-0.881669	-0.094852	0.289343	-0.696111
b0911	rpsA 30S ribosomal subunit protein S1	-3.16278	0.652901	-0.327945	1.7548	0.280908	2.34349	0.31079	2.23641	-0.252681	2.37242	0.636351	2.69843	0.226427	2.56052	2.31533	-0.355449	1.63783	1.70432	2.41706	1.07499	-0.526267	1.36616	2.52668	1.28524	2.41035	2.32649	2.11113	0.812449	2.50623	2.79042	0.864702	0.0977952	1.98993	2.10108	-0.782619	1.78158	1.47889	2.87782	1.72094	2.571	1.38749	0.0241326	1.7991	0.764835
b0912	ihfB IHF transcriptional dual regulator	-0.679123	0.749438	-0.696613	-0.0754806	-0.803089	0.256994	-0.465717	0.535164	-0.839961	0.433828	-0.0596719	0.76297	-0.225812	-0.00215173	0.302613	-0.727526	-0.448492	0.0614662	0.57011	-0.940124	-0.705823	-0.503394	0.133339	-0.316989	0.280025	-0.477318	-0.141673	-0.779282	0.397881	0.516883	-1.77935	-1.25839	-0.10383	0.36402	-0.89873	-0.0197583	1.63403	0.877257	-0.473147	0.717953	-0.933765	-0.517016	-0.66526	-0.555556
b0913	ycaI putative recombination protein with a metallo-hydrolase domain	0.932176	0.628831	-0.482997	-2.10216	LQ	-1.143	-4.91585	-1.15467	LQ	-3.04125	-1.08858	-1.4643	-1.21199	-0.945719	-1.25163	-0.933587	-1.47812	-1.39627	0.263438	-1.15628	-0.403132	-0.811805	-0.766556	-1.06623	-0.771523	-1.24979	-1.23947	-1.12073	-3.3386	-0.36921	-5.1002	-5.15566	-1.00077	-1.06552	LQ	-0.601572	-3.12853	-1.7111	0.0662269	-0.744237	0.65765	-0.977133	-3.0179	-1.10925
b0914	msbA ATP-binding transport protein	-3.47002	0.699969	0.606822	1.8525	0.61123	1.66707	1.31563	3.2441	0.642079	1.45087	1.43901	2.16133	0.626331	1.93641	1.70674	0.901731	1.31722	1.21119	1.4353	0.0520679	-0.0997991	0.284539	1.98453	0.622128	1.9406	2.96947	3.17323	0.606653	1.7844	2.04799	0.0899152	-0.373394	0.569646	0.691828	0.481675	1.00286	-0.0192549	2.28628	0.302279	1.92193	5.53906	0.583099	1.93709	0.921588
b0915	lpxK tetraacyldisaccharide 4'-kinase	-2.53963	0.870127	1.12274	-0.267357	-0.359642	0.375125	3.57588	-0.0189367	-0.434239	0.865622	1.02247	1.25614	0.656067	1.17095	1.28815	0.829755	0.06543	0.36375	0.771754	-0.482032	-0.714859	1.08272	0.945997	-0.208775	1.37701	1.31376	1.7565	0.202665	1.26501	1.14772	-0.815162	-0.645555	-0.282404	0.0936965	-1.28602	0.18123	-0.842759	2.01743	0.115421	1.09152	0.177235	0.886268	0.396288	0.370997
b0916	ycaQ conserved protein	-0.00262833	0.276715	-0.531329	-6.48769	-2.644	-1.11532	-6.56349	-1.59165	-1.59844	-0.446006	-3.57366	5.08513	1.16424	-0.723429	-1.07133	-2.09504	1.1835	0.193723	-4.77682	-2.48163	-7.44837	-3.58534	-0.198823	1.85017	-4.01768	-1.61614	-1.40225	3.4949	3.55305	3.67484	-6.00838	-6.64014	-2.9617	-4.33983	0.227124	-0.270468	-6.61284	-0.977714	-4.88412	0.130897	-9.15876	-7.86085	-0.322271	3.04105
b0917	ycaR conserved protein	-0.787722	0.554979	0.18494	LQ	0.339248	LQ	0.389265	LQ	0.997467	1.11518	0.308321	2.0092	0.236746	0.686651	LQ	0.430094	0.441177	LQ	1.34768	0.00681986	0.101734	0.632856	1.46875	0.504536	1.34462	1.7061	1.534	0.367133	1.92539	1.66217	-0.33398	-0.176681	0.238544	0.492982	0.0536369	0.691473	-0.213334	2.07907	0.160366	1.87676	-0.137885	0.201749	1.78529	1.01582
b0918	kdsB 3-deoxy-D-manno-octulosonate cytidylyltransferase	-0.981251	0.558078	-1.03547	1.24505	0.387969	-0.422534	-0.548851	1.56417	0.261097	0.389463	-0.741092	0.106924	-0.238873	0.00583822	-0.27626	-0.288355	-1.07674	-1.29292	-0.176299	-1.58037	-1.2586	-0.891747	0.437808	-0.804223	0.415508	0.599196	0.548371	-0.495489	0.119851	1.41206	-1.86085	-1.70269	1.10937	-0.393263	1.54923	0.999977	-1.45229	0.620945	-1.44573	0.353652	-1.22505	-0.690827	0.0185257	-0.509748
b0919	ycbJ conserved hypothetical protein	0.130737	0.530573	-0.0852515	-1.96702	-0.953833	-0.700871	0.15492	-0.647163	-0.552431	-0.405947	-1.45214	-1.15199	0.0572423	1.29718	0.886055	-0.468068	-0.986731	-0.883141	-0.44035	-1.42704	-0.0772127	-0.943954	0.329619	-1.9905	-0.0916424	0.208814	0.308433	-1.14487	-0.989587	0.965555	-0.946433	-0.29477	-1.32967	0.778268	-1.77284	-0.501933	-0.747481	-0.127406	-2.85616	0.559468	-3.20641	0.849784	-0.127555	-0.747291
b0920	ycbC conserved inner membrane protein	-0.809763	0.87499	0.784609	-0.144517	LQ	-0.113569	1.06207	-0.565481	LQ	0.270738	-1.36114	-0.980416	1.07356	-0.0360447	0.247073	-1.63914	-1.46333	-1.05109	2.28641	-0.881556	-0.354948	-0.0772811	0.45533	-0.507112	0.136387	0.490697	0.588068	-0.633234	-0.0246398	0.857824	-1.79902	-1.5248	LQ	0.9627	LQ	-0.0448017	-0.174761	-0.00197591	1.9591	0.331719	-1.90741	1.32744	-1.45976	2.68314
b0921	smtA predicted S-adenosylmethionine-dependent methyltransferase	-1.04175	0.688351	1.30629	-1.21494	-0.808942	-0.38716	-1.32699	-1.10784	-0.675056	-0.421975	-0.52968	-0.756782	0.531601	0.0767121	0.323574	-1.15605	-1.5244	-0.961047	-0.142432	-0.988035	-0.942561	-0.999846	-0.275907	2.5602	0.741568	-0.353711	-0.463115	-0.93817	0.5515	-0.469901	1.71091	2.15223	-1.01756	0.180539	0.523729	-0.286978	-0.733252	1.08407	-1.90521	-0.638929	-1.37898	-0.440901	-1.49218	-1.29203
b0922	mukF Ca 2+-binding protein involved in chromosome partitioning	-2.84788	0.875341	1.16279	1.24425	0.634312	1.53786	0.247331	1.39627	0.156985	1.95834	0.747628	2.06746	1.0865	1.82666	1.77356	0.116319	2.05226	1.77443	1.90051	0.43066	-0.576636	0.62909	1.94406	2.62433	2.01698	2.43202	2.02239	-0.171629	2.2256	2.13201	1.14981	0.608908	0.589565	2.06367	-0.43049	1.32351	0.500783	2.36373	0.522378	2.06766	0.585613	0.0948359	1.51263	0.499054
b0923	mukE protein involved in chromosome partitioning	-2.07647	0.708987	-0.051695	1.08039	0.0233266	0.980809	-0.181682	1.13943	-0.132766	1.5477	1.0629	1.55868	0.0793	0.791969	1.19816	0.0801703	0.131683	0.875492	1.08554	0.270029	-0.54009	0.369298	1.42406	0.527178	1.04425	0.342533	1.02902	0.279332	1.53327	1.6043	-0.0426881	0.493951	-0.601288	0.410264	-1.14033	0.35198	0.270079	2.19758	0.383165	1.31463	0.171041	0.386997	0.714162	0.0120224
b0924	mukB cell division protein involved in chromosome partitioning	-1.90641	0.489763	0.0547924	0.160636	0.178856	0.634174	-0.0900443	0.547649	0.750497	0.451981	0.562607	1.16409	1.11772	1.11424	1.84439	0.864824	0.190358	0.703551	0.485645	-0.846737	-0.900373	-0.560658	0.575188	1.5598	0.868752	-0.396962	-0.120823	0.278088	0.729741	1.12782	-1.85142	-1.31219	0.0804297	-0.576727	-0.537985	-0.18589	-1.54539	1.13374	-0.829081	-0.359687	-0.994344	0.0197301	0.241344	-0.296244
b0925	ycbB predicted carboxypeptidase/amidase	-0.748645	0.461623	2.07058	2.90409	2.79478	3.2738	3.31066	2.21079	-1.49337	-0.0311569	4.04617	1.53358	5.74165	4.73023	4.69177	7.13168	4.22429	4.54087	2.3317	2.9088	-0.172875	-0.246773	3.093	3.5166	0.50691	0.200378	-0.164667	0.936266	1.25643	2.62943	0.608323	1.50136	-0.227427	-1.49398	4.14431	1.953	2.15088	3.00673	3.41728	1.30906	-1.28246	4.59564	2.28308	0.189134
b0926	ycbK conserved protein	0.464813	0.815298	-1.78877	-0.461228	-1.76646	-0.990199	-1.99474	-0.655952	-2.33962	-1.42507	-0.686493	-1.16001	-1.48054	-2.03049	-1.39123	-1.58662	-0.0688333	-0.10967	-1.28232	-2.19451	-2.99649	-2.75636	-0.535999	0.252333	-1.53439	-2.30478	-1.85135	-0.87923	-0.774449	0.159667	-2.5709	-1.90315	-2.11089	-2.05384	-2.62704	-1.54227	-2.64225	-0.847741	-0.445137	-1.2968	-2.41648	-1.90072	-2.17853	-1.28534
b0927	ycbL predicted metal-binding enzyme	0.207083	0.731215	0.635504	-1.34946	-1.98687	-0.156312	-2.37339	-1.20199	-1.342	-1.28822	-0.658673	0.0263333	-0.841201	-2.35115	-1.75656	-1.84643	-1.63935	-1.44783	-1.56922	-1.32723	-3.21812	-3.04896	-0.972968	-2.47151	-0.286851	-0.868996	-0.762639	-1.61408	-0.43961	-0.577911	-1.68426	-1.28931	-0.830201	-1.87323	-0.276995	-1.00384	-1.59766	-0.491298	-1.85213	-0.262179	-3.45508	-1.86921	-1.68994	-0.97324
b0928	aspC aspartate aminotransferase, PLP-dependent	-1.51116	0.623114	-1.72224	0.0456594	-0.429639	1.06368	-2.16636	0.112449	-0.00111309	0.0308763	3.24137	4.96475	1.808	2.33678	2.12815	4.01824	4.00825	4.03142	4.19648	1.27524	4.92978	1.9476	1.62839	-0.0484859	2.87614	0.6824	0.751435	3.24424	4.62307	2.76709	2.71978	3.54661	1.30391	0.743974	1.27128	1.21474	-1.07835	3.23699	-0.130432	1.77787	2.79398	-0.774958	2.44315	2.453
b0929	ompF The Colicin A Import System	1.17801	1.09613	-2.75683	-1.21914	-1.24234	-1.97791	-2.94713	-3.27898	-1.55203	-2.45846	0.419809	0.590279	1.75977	1.62618	1.95886	2.12731	2.44552	2.7278	1.49421	1.7592	1.26923	1.00904	-0.971956	-1.28824	-0.0929884	-0.103308	0.0226752	0.821269	-0.364512	3.5519	3.41933	4.20008	-0.114211	-1.64714	-1.85675	-1.35745	-3.49326	-0.345122	1.18003	-1.054	1.34371	-0.501054	0.856857	2.8504
b0930	asnS asparaginyl-tRNA synthetase	-2.43458	0.67422	-1.72929	0.529731	0.0821221	0.861894	0.426092	0.0902669	0.235318	1.86722	-0.00387315	1.75177	0.538066	2.0422	2.01622	0.273168	1.65502	2.06495	1.20186	-0.0599812	-0.8294	-0.147168	1.61745	-0.411466	1.54043	1.44318	1.12944	0.389801	1.61575	1.95519	5.38761	5.17056	1.07211	-0.175698	-1.58739	0.459147	1.32318	1.98966	-0.295483	1.7176	-0.132309	0.73961	1.32609	0.0348776
b0931	pncB nicotinate phosphoribosyltransferase	-0.43835	0.523354	-1.71864	-2.61363	-1.16298	-1.30969	-0.509143	-4.4415	-0.926612	-3.27065	-0.625132	-3.61023	0.361953	-3.64351	-3.64101	-1.02525	-3.08499	-2.91176	-3.32602	-0.569226	-1.42137	-2.04945	-0.352469	-1.48943	-0.964751	-2.21701	-2.7749	-0.35119	-2.88594	-3.3118	-6.29246	-5.9393	-1.7582	-3.91672	-4.54292	-0.430558	-2.99859	-3.40594	0.495355	-2.95051	-6.28193	1.26635	0.873869	-1.39526
b0932	pepN aminopeptidase N	-1.13557	0.742579	-0.252945	-0.73553	0.632811	0.774669	0.392008	0.492207	-0.303462	0.107599	0.040032	1.49585	0.402853	0.373652	0.0227832	-1.32599	0.647324	0.683618	0.880703	-0.932254	1.09135	0.410693	1.25283	0.512825	1.46649	0.713677	0.690239	0.242947	0.725733	1.00777	-0.80533	-0.85026	0.516975	1.09894	-1.33169	0.913839	1.00332	0.812135	0.801074	0.904675	-0.0999903	1.39753	1.01336	0.75669
b0933	ssuB aliphatic sulfonate ABC transporter	-1.17582	0.724427	1.49945	-1.72561	0.779221	0.294984	1.33821	0.1244	-0.815821	-1.13573	-0.261619	1.73565	0.293073	0.0238791	-0.221312	1.67407	1.8277	2.65179	2.03579	0.389673	-1.55896	0.485827	1.72744	0.693903	1.21472	0.749471	0.271073	0.124684	-0.304127	1.5266	0.719529	0.376181	0.342354	-1.12071	1.34394	-0.162608	0.316534	-0.238688	-2.66376	0.784358	-1.80988	1.32716	-1.52393	0.654476
b0934	ssuC aliphatic sulfonate ABC transporter	-2.27139	0.893947	-0.00868605	0.448539	0.772982	1.37416	1.56758	1.41498	-1.1173	0.295866	1.85208	1.23147	1.09317	1.49063	1.07635	1.351	0.413119	0.422599	3.00413	-0.354887	2.54973	1.68766	2.0302	-0.336844	3.10712	0.362863	0.502514	0.455756	0.527343	0.127761	-1.14539	-1.17557	1.68795	2.21699	2.11268	1.95065	1.73151	0.270142	-1.16081	2.71338	-0.35723	3.7554	-1.1022	2.34776
b0935	ssuD alkanesulfonate monooxygenase, FMNH 2 -dependent	-1.7396	0.660115	-0.875952	0.386669	0.309796	1.71013	-0.315121	1.64665	0.555254	0.166151	1.86787	2.13967	1.64785	0.269488	0.962511	1.1322	-0.287776	0.285799	3.79811	-0.376611	-0.549811	-0.74136	1.18327	-0.568951	1.7606	0.303455	0.741832	0.126944	1.38342	0.92307	-0.635838	-0.226597	0.904658	0.355061	-0.760426	0.431586	-0.224866	2.33122	-0.873805	1.16076	-0.0694518	0.353709	-0.46109	0.983103
b0936	ssuA aliphatic sulfonate ABC transporter	0.0592633	0.667543	-1.88893	-2.00146	-0.688661	-1.26555	-3.4548	-1.59101	-2.53224	-2.90895	-0.155604	-1.44507	-0.66457	-2.22939	-1.98317	-0.307041	-1.48	-1.85189	-1.43075	-0.715648	-1.36825	-3.38748	0.565468	0.0481465	-0.204269	-0.481559	-0.303492	-1.30908	-0.0490502	0.413522	-0.972742	-0.489594	-0.600685	-2.4644	-0.479474	0.576319	-3.5185	0.0284641	-3.25472	-1.06866	-0.39773	-1.6441	-2.95455	0.368231
b0937	ssuE NAD(P)H-dependent FMN reductase monomer	-0.103166	0.217599	4.06821	3.07584	-1.24442	-0.769659	-5.40875	4.03842	-3.77735	-3.08582	-1.64358	5.8185	1.16126	-2.6933	-1.81955	-1.58795	-4.9451	-3.73416	-2.1555	1.19242	-7.53683	-3.13055	1.675	4.29328	2.168	0.676254	1.37027	1.2466	-1.72488	7.20807	-5.72002	-3.0747	-0.426213	1.99994	-3.66421	3.46238	0.731237	-1.5004	-5.455	-4.59697	-5.83157	3.01157	-4.02247	2.84997
b0939	ycbR predicted periplasmic pilin chaperone	1.70937	0.413809	-1.01301	-1.35398	-1.86407	-0.637034	-1.2212	0.866412	-3.67659	-7.9214	-2.2325	1.37274	0.268048	-0.0119966	-0.310645	0.333907	1.17292	0.704478	-1.04116	1.78646	0.164979	0.672409	0.641347	0.206323	-0.266319	1.56649	0.879781	0.450226	1.79463	-2.47835	1.7483	0.752907	0.310142	-0.939503	-0.665378	0.855338	-0.00736561	-0.826934	1.00126	-2.86373	-0.894671	1.19952	2.12531	-0.402941
b0940	ycbS predicted outer membrane usher protein	1.69413	0.639061	-2.3637	-0.839217	0.236393	-1.49543	-1.86813	-1.38543	-3.69121	-2.52301	-0.534862	-0.504585	-1.17096	-0.824778	-0.420034	-0.327879	-1.98874	-1.87924	-1.58876	0.290646	-0.952127	-0.136062	-1.21749	-0.431723	-1.206	-0.49538	0.0300759	0.353262	-1.84311	-0.82219	-1.06056	-0.628149	1.71421	0.661831	1.97412	-0.732046	-0.724412	-1.03224	0.908442	-1.16135	0.42337	-1.5527	0.342809	-2.54607
b0941	ycbT predicted fimbrial-like adhesin protein	1.62154	0.526204	-5.04363	-1.72671	-2.05979	-2.74912	-5.52145	-0.39079	-5.26264	-4.56141	-1.35919	-2.49506	-1.93665	-1.53112	-1.42662	-1.2781	-2.39192	-2.01487	-1.69505	-3.64462	-1.45688	-1.30225	-1.0534	-0.836342	-2.19303	-1.19871	-1.2032	-0.967265	-2.75913	-2.6631	-4.28752	-4.69268	-0.498642	-0.589474	0.35423	-0.987076	0.753731	-2.3416	-2.95217	-1.15679	-5.53866	-1.97154	-0.922715	-1.5158
b0942	ycbU predicted fimbrial-like adhesin protein	-0.128864	0.454017	2.82383	0.842913	1.14735	1.31645	5.04972	2.18283	1.28191	-1.51121	0.955485	-0.73463	1.92476	0.785158	0.512289	1.09748	2.12214	1.42472	0.27262	-2.51484	3.34747	3.72736	1.44532	1.03583	2.064	0.637804	0.383585	1.55819	-0.778207	3.65604	-3.97076	-4.34686	1.0188	-2.57918	-0.205086	-0.0618005	-0.981749	1.14949	0.37595	1.31903	0.37607	2.46546	0.473464	1.09379
b0943	ycbV predicted fimbrial-like adhesin protein	-0.781977	0.946891	1.37965	1.44126	1.09341	1.08308	-0.416951	LQ	-0.450909	0.737666	0.456775	0.539551	1.54172	1.55587	1.46305	0.375303	1.54362	1.78666	0.27854	0.647642	1.65786	1.04952	1.41662	2.34355	2.02235	1.8383	1.77043	1.83415	0.980692	1.60489	-1.41899	-1.52788	2.25986	-0.413091	1.0867	0.987184	2.92575	1.16659	1.03198	1.0807	-1.16384	1.25747	0.798388	0.344838
b0944	ycbF predicted periplasmic pilin chaperone	0.557952	0.615853	-2.23853	-1.9976	-1.58745	-0.713927	-4.95213	0.200301	-4.06695	-2.32688	-1.93428	-3.56561	-1.85243	-0.208583	-0.101298	-1.68377	-4.29722	-4.01811	-1.21619	-2.48307	-1.44113	-1.86857	-1.26062	-2.03678	-1.60918	-2.36274	-1.96863	-0.861569	-1.00747	-1.54365	-6.73328	-5.7981	-1.45278	-5.13985	-1.47494	-2.32324	-3.07558	-2.16124	-1.75709	-3.07393	-2.30464	-1.3737	-1.03795	-3.35309
b0945	pyrD dihydroorotate oxidase	0.799056	0.319326	-3.54823	-6.32868	-2.64907	-1.9772	-12.2394	-5.94969	-6.54114	-7.69058	-5.76902	-5.81573	-8.64128	-6.30293	-5.65557	-9.68828	-10.1734	-9.43349	-6.623	-3.44719	-5.23444	-8.58796	-6.37306	-3.70699	-7.76729	-4.5661	-4.3089	-4.26146	-6.01131	-6.59666	-12.648	-12.0607	-6.84591	-9.90799	-4.53564	-2.71542	-10.1027	-4.61326	-8.95703	-7.74077	-9.17241	-9.76221	-8.26734	-10.4801
b0946	ycbW predicted protein	0.19254	0.25647	-5.70799	-5.29252	-1.91857	-3.22444	-8.75231	-2.75867	-4.09762	-5.99009	0.699531	1.41334	0.0527947	0.577921	-0.352564	-3.85896	-2.57704	-1.41234	-3.00572	-4.06839	-3.55846	4.13989	-0.424649	-0.452699	3.33546	-1.76947	-1.3034	-2.5447	1.23295	2.65683	-7.85252	-6.44827	0.529385	-3.41415	-4.01672	0.294641	-1.61523	-2.66375	1.31632	1.65873	-3.82815	-2.74167	-3.04729	-7.85261
b0947	ycbX predicted 2Fe-2S cluster-containing protein	0.0702461	0.500158	-0.921668	-3.48974	-1.26017	-1.95537	-2.66712	-3.78722	-2.08773	-3.92545	-1.2026	0.567956	-0.0770454	-0.190065	-0.495414	-0.955209	1.05343	1.67309	-1.9633	-2.66651	-0.178123	-2.80045	-1.34909	0.687545	-2.41573	0.509359	0.464501	-1.73093	-0.147275	-1.70536	-0.309621	0.15806	-0.0650242	-1.24357	-2.80418	0.875274	-4.96962	0.391366	-1.26092	-0.278926	-4.5434	-2.56929	-2.78833	-1.8327
b0948	rlmL 23S rRNA m 2G2445 methyltransferase	-0.984245	0.667725	-1.35317	0.601179	0.972785	-0.755941	2.24795	0.366911	-1.72591	-1.18506	1.44638	2.47722	0.614429	0.979549	0.811355	0.839507	-0.548775	-0.13945	0.374088	-2.2251	0.628819	-0.347371	1.17469	0.599151	1.99386	1.35784	1.46466	0.845234	1.22685	-0.0974147	1.34893	1.57623	1.73443	0.840097	0.698316	0.969948	-3.09719	-0.0206703	0.229171	0.489816	-2.56273	0.882556	1.76733	-0.0153365
b0949	uup ATP-binding protein with possible role in replication	-1.05017	0.315245	0.0790746	-0.111808	1.26373	-1.55917	3.77806	2.71117	-3.80584	0.429674	1.58819	2.51888	-0.0792289	1.83803	1.08342	-2.55694	0.300419	0.603734	0.780855	-1.24802	-6.5042	-4.12653	1.57881	-2.09525	1.3588	1.54282	0.553913	0.959602	0.808604	-0.705998	-2.60192	-3.19295	3.33753	2.2025	0.676619	-1.44079	-5.34456	-1.80992	-1.6602	-0.972536	-5.45288	2.6094	2.25571	-3.9747
b0950	pqiA paraquat-inducible protein A	-0.78605	0.6778	1.86255	0.513577	-0.347789	-0.355834	-2.77153	0.664763	-1.82236	-2.07392	-0.642632	-2.46218	0.88452	-0.432167	-0.654314	0.074507	-3.32594	-3.63036	-0.943212	-0.877903	-0.96836	0.52057	2.05548	-0.630471	-1.72682	-1.93823	-1.96504	0.326426	0.0450588	0.229047	2.18209	2.62824	0.701082	0.940854	-1.70961	1.25668	-1.665	1.04468	-3.1105	2.39299	-1.24922	-1.13967	-1.63573	-3.04976
b0951	pqiB paraquat-inducible protein B	-0.618246	0.81653	-0.429615	-0.595066	0.287	-0.198167	-1.01403	-1.07277	-0.718124	-1.3795	0.405371	0.230682	-0.497345	0.158432	0.0316832	0.026062	-1.87013	-1.61917	-1.26257	-0.0946969	-1.31619	-0.792487	0.237244	-0.0385621	-0.997397	-0.887406	-1.15573	0.378178	1.25342	0.437857	0.469955	-0.377036	-0.00111488	0.272427	-1.42561	0.51178	-0.44016	-0.690447	-2.41125	-0.651673	-1.29942	-0.287636	-1.51327	-0.0671353
b0952	ymbA conserved protein	-0.510298	0.963024	1.23226	-1.0829	0.0189442	0.33731	0.274765	0.864741	1.63159	-0.616171	-0.782464	-0.221027	0.429937	-0.364276	-0.504972	0.510864	-1.46133	-1.36952	-0.194906	-1.27999	2.53233	0.201854	0.247703	-0.174102	-0.634967	-0.75183	-0.741084	0.288671	1.89206	2.33123	-0.504246	-0.567113	0.97947	0.781571	-0.238828	-0.650801	-1.59206	0.0277813	-0.239917	-0.420262	-1.1246	1.65182	-1.49695	-0.948546
b0953	rmf ribosome modulation factor	-0.707527	0.636545	-0.945987	0.760329	-0.22992	0.945752	-0.267441	LQ	0.261897	0.99661	0.723867	1.37235	-0.303346	0.44591	0.707778	-0.739811	0.523491	0.508341	1.20188	-0.0540258	-0.507208	0.250018	1.21049	0.406693	1.05229	0.542647	0.712817	-0.6532	1.2441	1.50937	0.173716	0.269661	-0.338552	0.410319	1.52994	0.62278	0.00632604	1.8773	0.115331	1.18394	-0.161879	-0.416275	0.0912625	0.0659362
b0954	fabA beta;-hydroxyacyl-ACP dehydrase [multifunctional]	-0.535309	0.891164	-2.10753	-1.90854	-0.738527	-1.16885	-2.20735	-1.5027	-1.23721	-1.41395	-0.87412	-1.45045	-1.83707	-2.01816	-2.01665	-2.00801	-2.32278	-2.58249	-0.966148	-2.82433	0.385095	-2.15825	-1.05812	-2.22673	-0.849228	-0.338404	-0.371973	-1.01596	-1.45334	-0.868343	-2.43521	-2.19487	-1.46032	-1.24713	-0.251884	-0.883592	-2.43454	-0.963905	-2.56129	-1.87734	-2.80101	-1.14294	-2.34242	-0.58514
b0955	ycbZ putative ATP-dependent protease	-0.202262	0.315767	-2.2654	-2.62314	-3.05817	0.221791	-8.1426	-1.54676	0.71075	-0.201889	-6.71967	-5.07559	-6.73946	-5.50916	-6.55832	-5.40495	-7.90253	-9.15519	-0.851321	-5.8199	5.05938	-6.01462	-2.29579	-3.69717	1.9816	0.825787	1.10882	-1.76097	-0.6423	-0.861968	-9.08262	-8.90776	-5.51797	3.04946	-5.4178	-5.50821	-3.30905	-0.600834	-2.20506	-4.61382	-9.51466	1.78346	-1.41892	-3.6903
b0957	ompA outer membrane protein 3a (II*;G;d)	-0.347727	0.613641	-2.45499	-2.32082	-2.79932	-2.28789	-2.57046	-2.44313	-3.13059	-1.96753	-2.43329	-1.50733	-2.31209	-2.05005	-2.15962	-2.14711	-3.11128	-2.80882	-1.68964	-3.47429	-3.34633	-3.2083	-1.43128	-2.29973	-1.59784	-2.2853	-2.29372	-2.63183	-1.61137	-1.39347	-3.29277	-4.12571	-2.68998	-1.76186	-3.85461	-2.61035	-4.00762	-0.93643	-3.96529	-1.66485	-4.01503	-2.74627	-2.43066	-2.26659
b0958	sulA SOS cell division inhibitor	-0.355229	0.473197	-1.19609	-3.65346	0.00321592	LQ	-1.70755	LQ	-0.454391	-1.08895	-0.191201	-8.38276	-1.00879	1.20077	-1.04527	-0.377183	-8.36239	-5.0225	0.923849	5.16206	-0.51969	4.94355	-1.62535	4.23911	0.510501	-1.32994	-1.25513	0.688009	-2.07305	-2.37874	-8.38276	-6.55877	0.293707	-0.417248	1.02496	0.953923	4.57668	0.307526	-3.37596	-7.46364	-8.38276	-2.62997	-0.0841386	4.90919
b0959	sxy transcriptional coactivator for CRP	0.271712	0.456747	-1.74573	-1.98734	-1.54651	0.295326	-5.07287	-0.0180315	0.0314088	-1.7465	-2.94943	-2.48101	-0.783779	-1.52403	-1.69637	-1.08128	-2.90061	-2.84145	-2.81175	-1.8729	-3.28052	1.59417	-0.828302	-2.04766	-2.01459	0.510119	0.33116	-1.52774	-2.50302	0.0201426	-0.999115	0.00845256	0.178548	0.596095	-1.14217	-0.0667656	-2.72604	0.889901	-3.43598	-2.87643	-0.0145317	-1.50739	2.17127	-1.77067
b0960	yccS hypothetical protein	0.580154	0.346642	-0.648473	-4.96343	-0.658251	-1.9818	-8.98881	-0.620849	-7.79483	-3.4531	-3.0791	-0.621339	-4.18014	-2.1547	-2.24593	-2.24654	-3.93775	-3.55106	-5.43791	-8.23617	1.05592	-1.20454	-0.799325	-2.00742	0.241591	0.618407	0.594879	-2.35623	1.40583	-0.220691	-4.10777	-3.42184	-0.349721	0.286235	-0.169464	0.34802	-1.0198	0.891162	-1.88799	-0.274346	-7.78602	0.906828	-0.874224	-0.0344799
b0961	yccF conserved hypothetical protein	-0.772571	1.08346	-0.114424	0.507017	0.79141	1.05818	-0.530654	-0.0380557	0.417305	-0.471624	0.864435	0.685521	1.50109	1.43283	1.13031	0.553377	-0.336516	-0.312051	0.6133	0.353868	1.80822	1.39516	1.10118	2.03842	1.06933	0.785194	0.711572	1.50316	2.53783	1.38903	1.8706	1.87599	1.04073	0.0319941	0.35542	1.49177	-0.761927	0.408804	1.80369	0.941227	1.76653	0.662837	0.218876	2.16024
b0962	helD DNA helicase IV	-0.337173	0.267841	1.38282	-3.26266	0.280794	1.0149	-3.88124	0.166617	-1.80464	-1.54952	0.296054	1.89179	2.6691	-0.728935	-0.589155	3.24257	-0.277895	0.574998	1.91735	1.64128	-3.40478	-4.85251	-0.3853	-1.64509	-2.18993	-2.86996	-2.29509	1.81101	-2.41696	1.31597	-5.66227	-4.62317	0.663682	1.9485	-2.64295	-0.729128	2.01953	-3.43433	-1.50855	0.720547	-8.76555	-4.66604	-5.10822	2.42403
b0963	mgsA methylglyoxal synthase	-0.151021	0.67593	-0.459731	-0.529606	-0.923968	-0.0406671	-2.20486	0.0070254	-0.854144	1.25958	-0.0904344	3.22749	0.47983	0.576125	0.58188	-0.673247	-0.86224	-0.737927	1.15849	-1.54655	-2.79965	-0.362882	1.02602	-0.408856	0.814704	0.228839	0.514715	0.553766	-0.283843	1.08107	-3.07268	-2.60654	-0.275408	-1.1845	-0.994676	0.520393	-1.32541	-0.0737552	1.2832	-0.168569	-2.80875	3.14382	-0.931385	0.393205
b0964	yccT conserved protein	-0.432678	0.528165	1.35331	-1.02345	1.02536	1.2106	0.43256	2.45837	-0.341952	1.46264	1.45197	2.15439	1.62834	0.721245	0.884394	0.88376	2.5866	2.90606	0.821614	0.755195	-2.27812	-0.0155104	0.570587	0.398448	1.0409	0.41196	0.773833	-0.369281	-1.41189	2.02119	-3.2191	-2.90806	0.722673	1.28665	1.8035	1.20405	1.61387	0.346551	-0.378605	0.526973	-0.827418	0.910103	-0.319984	-0.0609478
b0965	yccU predicted CoA-binding protein with NAD(P)-binding Rossmann-fold domain	0.67639	0.405706	-0.83459	-2.55137	-2.34234	-0.944544	-1.06665	-2.04591	-0.53265	-3.39961	-0.0846767	-0.556847	0.287159	-0.56256	-1.0505	0.807844	1.41496	0.741336	-1.36423	-5.30526	-0.328161	1.29653	-0.813789	-2.57995	-1.19935	-1.53303	-1.56296	-1.03898	-4.53806	0.418797	-7.06354	-6.16008	-3.00002	-2.44044	-4.9451	-0.580802	-4.16655	0.567601	-3.11627	-2.01242	-5.54268	1.53571	-2.60249	1.09051
b0966	hspQ heat shock protein, hemimethylated DNA-binding protein	-1.24016	0.734459	1.47677	2.08792	0.0249073	1.78131	-0.0369466	1.20507	0.692457	3.03451	1.13496	0.91694	1.31634	2.17373	2.26099	0.544806	-0.0544032	0.695777	0.48412	4.90881	0.409482	0.365177	1.63517	1.91357	1.30673	-0.110189	0.453072	0.780109	0.719832	1.69904	-1.03637	-0.329513	-0.479574	2.06783	-0.271204	0.927427	0.401801	1.78133	-0.352063	2.10064	-0.50622	1.11449	0.0781697	1.45927
b0967	yccW predicted methyltransferase	-0.922492	0.383806	0.295427	-0.792244	2.05251	3.17223	0.959864	0.0977624	-0.147296	1.20701	1.33227	-1.54047	0.735951	0.721363	1.17968	1.72844	-2.48852	-1.66686	-0.561177	-2.82621	3.24754	4.4712	2.5515	1.54448	1.81742	0.308173	1.20909	0.875367	-0.705239	2.57926	-0.932835	-0.24541	-0.121669	1.26121	2.0211	2.46005	-1.69798	3.21552	2.55123	1.8645	-2.59851	3.49586	-2.69396	2.70448
b0968	yccX acylphosphatase	0.240403	0.43705	-1.35668	-1.07375	-2.23679	-0.814103	1.73881	-0.944217	-0.393522	-0.0894154	-2.45258	-1.10149	-1.16732	-1.77206	-1.42799	0.811741	-3.27924	-2.21528	-1.68375	-3.67325	-3.81771	-2.7464	-0.16234	-2.2389	-1.80902	-2.94517	-2.32666	-1.89354	-1.09245	0.651237	-3.30199	-2.87248	-1.53228	-2.75993	-4.39904	0.762754	-0.951499	0.517269	-2.45339	-0.118357	-3.99214	-0.04749	1.49794	-1.20396
b0969	tusE sulfur transfer protein	-0.0480466	1.29793	0.498502	-0.663895	-0.28993	0.109389	-0.83953	0.23834	-0.14399	0.601503	-0.149166	-0.0952449	-0.103202	-0.603222	-0.443589	-0.253152	0.202294	-0.0532938	0.386322	-0.557401	-0.947598	-0.371407	0.126411	-0.0643917	-0.655617	-0.687341	-0.543577	-0.469035	-0.449693	-0.00800613	-1.15859	-1.01739	-0.478328	-0.861844	-0.173699	0.39897	-0.929377	-0.22673	0.088194	-0.334524	-1.19428	-0.328399	-0.963272	0.62825
b0970	yccA putative carrier/transport protein; substrate or modulator of FtsH-mediated proteolysis	-0.121607	1.14165	-1.31388	-1.96225	-1.10533	-0.0163014	-1.51342	-0.616764	-1.39589	-1.36444	0.38756	1.04886	0.0240731	-0.0178128	-0.0264956	-0.560806	-0.747929	-0.92614	0.377319	0.265373	-0.334836	1.64041	0.550083	0.117875	-0.863354	-0.155889	-0.333872	-0.174386	-0.883699	0.450846	1.18032	0.929693	0.333355	-0.804744	0.309051	1.54053	-1.61761	-1.27952	-1.46865	1.33434	-2.63074	-0.138584	-1.75449	-0.100732
b0972	hyaA hydrogenase 1, small subunit	0.460648	0.227185	-3.5513	-5.8983	-4.73744	-3.9591	-4.73203	-5.93682	-9.26296	-7.4806	-5.96654	-7.0854	-5.02321	-3.05293	-2.75901	-2.18499	-5.11829	-4.25048	-8.11603	3.60169	-17.2832	-16.0867	-3.42026	-7.63627	-5.78164	-4.44371	-3.86267	-5.36884	-2.23537	-2.46396	-15.7552	-14.3107	-8.19581	-8.55857	-5.21338	-6.74032	-0.812471	-7.90639	-3.62996	-4.3284	-15.7372	-2.17527	-5.93761	-9.50522
b0973	hyaB hydrogenase 1, large subunit	-0.83863	0.498713	1.88693	-1.82713	1.2284	-0.105959	-2.31128	-0.358511	-1.95605	1.37776	1.94464	3.14419	1.10515	1.73147	1.53352	0.851241	-3.03858	-3.10157	0.951566	-3.01765	-0.0952573	-0.513691	0.936097	1.84108	2.18173	0.802646	0.880691	-0.419906	0.136177	0.0300784	0.247903	-0.30525	1.8028	-0.325289	2.08464	-0.174395	-0.242829	1.08938	-0.616662	1.45951	-3.05986	-0.987754	-1.14945	-3.573
b0974	hyaC hydrogenase 1, b-type cytochrome subunit	-0.612238	0.737171	-0.312557	-0.828767	1.42794	0.452219	-1.69224	0.0274329	-1.1234	1.17113	1.00735	-0.626512	1.07964	0.578953	0.749768	-0.386815	-2.12875	-2.224	-0.0427828	-2.14197	-1.10455	-2.32969	2.44203	1.36724	1.65712	0.325048	0.537101	-0.319526	0.309655	0.993162	-3.57003	-2.70779	1.41144	0.58853	1.82975	0.358666	-1.8561	2.19423	2.24471	2.20342	4.012	0.013739	2.74481	2.05623
b0975	hyaD protein involved in processing of HyaA and HyaB proteins	-1.1443	0.411625	2.00745	-0.213041	2.25494	1.96647	1.62157	-0.20733	-2.33787	3.52135	2.55449	1.104	1.39606	3.31458	3.07617	1.5545	-2.99275	-1.84539	0.975344	-2.44191	-3.76563	-3.6328	1.64958	0.377259	2.56585	1.13077	1.80731	0.94588	0.578556	3.83462	-4.53811	-4.34041	1.79107	4.06043	0.648382	-0.42202	-3.69845	1.02713	3.63875	1.53902	5.0109	0.0690359	1.43862	0.180994
b0976	hyaE protein involved in processing of HyaA and HyaB proteins	0.0545891	0.88528	1.00299	0.041915	-0.6644	-0.656713	-1.89702	-0.75731	-1.3111	-0.235569	0.0826263	0.140384	-0.185922	-0.493388	-0.279917	-0.410436	-1.94433	-1.51879	0.891657	-1.49161	-1.77082	-1.95715	-0.389459	0.00540999	-0.167966	-0.207702	0.0859779	-0.62017	0.233786	-0.60199	-2.55282	-2.40559	-1.17814	-0.288624	0.397854	-1.18753	-1.56651	0.00098906	0.0455311	0.164975	-1.01932	0.936956	-1.76578	-1.86924
b0977	hyaF protein involved in nickel incorporation into hydrogenase 1 proteins	0.221653	0.90475	0.40569	0.784084	0.147163	-0.0985387	-2.59511	-1.86292	-0.931299	-0.416329	0.543769	0.0379849	0.797116	LQ	-0.119193	-0.538183	0.110582	0.0941067	0.308718	-2.9566	-0.386823	-0.53668	0.348286	0.488442	1.30315	0.292146	0.348415	0.194703	1.26188	-1.40458	-3.96735	-3.75775	0.404262	1.55534	0.573367	0.154985	-3.8456	-0.614258	1.43131	0.348835	2.47132	0.274424	-1.67505	-2.6134
b0978	appC cytochrome bd-II terminal oxidase subunit I	-1.15467	0.335183	6.02666	-2.19765	3.11473	4.13364	-2.37239	0.212493	1.4627	3.18388	2.23996	1.57258	4.48055	2.29663	2.48995	2.58305	1.50256	1.28876	1.7907	6.35444	1.6302	-1.62493	6.00181	3.02323	2.6146	1.89186	2.09057	1.33247	1.27885	-0.282767	-2.41579	-2.35611	-0.910494	2.80166	-1.59376	3.69186	-6.44124	2.96156	-1.97059	4.43104	-4.76764	3.6028	-2.38312	2.26804
b0979	appB cytochrome bd-II terminal oxidase subunit II	0.69613	0.703167	-2.0774	-3.03789	-0.947441	-0.0830819	0.152555	-0.344386	-1.56574	-1.42453	-0.987907	-1.13551	-0.245477	-0.232234	-0.178716	-1.86773	-3.05551	-2.85216	0.611057	1.63811	-5.58809	-2.70787	-0.381934	-0.846334	-1.43294	0.222227	0.166657	-0.571852	0.260285	-1.3577	-2.21317	-2.30846	-1.12301	-1.28335	-2.64867	-0.337236	-2.62442	-0.73303	0.333297	-0.343464	-4.77862	-0.0676966	-0.848485	-1.26515
b0980	appA acid phosphatase	-0.22533	0.533925	0.704409	-2.59272	-0.355239	0.111587	-0.419983	-0.72132	-1.51349	0.363966	-0.394014	-1.24824	0.690099	-1.55313	-1.28464	-1.81985	-0.768256	0.327967	-1.50724	1.15192	-5.20413	-3.24545	0.274761	-1.50404	-1.11893	-0.830306	-0.829574	-1.60041	-0.745503	-0.778611	-2.287	-2.13332	-0.738339	0.390862	-0.987063	0.0952463	-3.92723	-0.440134	1.9017	0.0863604	0.834978	-1.86183	-1.91881	-2.27025
b0981	etk autophosphorylating protein tyrosine kinase	-0.447459	0.367464	-1.07687	1.09292	1.4937	1.0466	-4.04258	1.82177	-1.08314	0.695279	2.47168	4.48154	1.96488	1.73511	1.14559	1.23302	0.442716	-0.368903	0.422627	-3.19664	-0.631314	-1.60431	1.49103	1.79077	3.08133	3.04933	2.9911	0.377862	-0.230504	-0.436314	5.01603	4.74458	2.18441	2.64699	1.32406	1.45022	-2.8355	-0.0709441	3.84796	0.165573	-5.15951	1.4722	0.153102	-3.91469
b0982	etp phosphotyrosine-protein phosphatase	-1.51732	1.09994	0.457304	2.51481	1.24781	1.5671	0.184579	1.56385	2.06746	1.06374	1.43237	1.37662	1.70556	1.4702	1.35262	2.04102	0.100993	0.401677	0.97017	0.161363	2.94971	1.35492	1.71553	0.918389	1.78167	1.13011	1.27378	1.35896	1.55945	2.21751	-0.130442	0.34518	0.999699	0.465075	1.2353	1.55227	-0.177615	1.55246	1.254	1.80321	1.16281	1.43258	0.769952	3.08459
b0983	gfcE predicted exopolysaccharide export protein	-0.319248	0.568919	0.510796	1.2642	-0.108167	0.262962	-1.81757	LQ	-0.204154	-0.0304911	0.745085	0.981945	1.42833	0.110819	0.149381	0.174825	-0.131155	-0.326476	1.1139	-0.663092	-1.8604	-0.0172057	1.1976	-0.568025	0.330833	-0.362483	-0.38935	-0.522898	1.3549	1.0599	-0.66492	-1.30484	-0.774338	0.80631	-1.72365	0.43748	-1.16258	0.543545	-0.846054	0.442403	-0.626691	-0.0610571	-0.741416	0.972906
b0984	gfcD putative lipoprotein	-0.162937	0.28866	1.86333	-0.127996	0.0206344	0.394003	3.22432	0.740449	-3.15892	-2.74915	1.72031	1.87825	0.173332	1.27532	1.09869	0.410651	-3.61301	-2.53161	-0.412281	-5.82846	-0.509852	-1.26741	-0.193912	2.54688	2.50901	-2.01359	-1.10095	-1.32127	-2.20101	2.19003	-6.44455	-4.36341	1.36387	1.60074	-0.0466072	2.25603	0.364504	1.87276	-3.17921	3.20051	2.17884	1.54168	-1.0317	-0.544916
b0985	gfcC conserved protein	1.01093	0.478138	-1.99946	-0.936136	-0.37186	-1.80331	-4.95547	-2.2424	-2.06756	-2.94318	1.05193	2.66043	-0.243351	0.202072	0.358103	-0.0460782	1.01815	1.21865	-1.64806	-2.83323	0.608359	0.586908	-0.737601	-0.289318	0.0703552	-1.40561	-0.896431	-1.11798	-3.41255	0.505906	-4.82811	-4.33711	0.186063	0.448291	-1.07418	-0.312528	-4.57917	-2.31112	0.297919	-0.406937	-5.28452	-0.885493	-0.795726	-0.067743
b0986	gfcB predicted outer membrane lipoprotein	2.02251	0.16988	1.93262	-0.82442	-1.71704	-5.33552	-13.2793	-4.34942	-7.20413	-18.1527	1.59579	0.74093	-1.74498	2.30073	2.83361	1.3251	6.99186	7.88772	-9.67995	0.00509596	-0.87954	-0.69203	0.931971	-0.448389	0.89541	0.557327	1.70897	-1.27495	-2.69078	-2.1159	-11.6649	-14.3237	2.58888	2.60827	2.07823	2.87016	1.72933	2.60381	4.59998	3.42265	-16.9997	0.736049	-1.0541	-4.02281
b0987	gfcA predicted protein	0.0297969	1.08423	1.71582	0.807035	0.365025	0.15341	2.36694	-0.278993	-0.478575	-0.650597	0.99687	0.28965	0.820861	1.69919	1.54688	0.813124	0.0396743	0.144921	0.52062	0.61402	0.581555	0.446512	0.58337	0.856697	1.05096	1.11607	1.13537	0.474932	1.52741	1.08482	-0.982121	-0.783427	0.986424	0.952305	-0.90689	0.949843	-0.678571	1.33454	-0.0214881	0.966055	1.29688	0.867983	0.868654	0.0473314
b0989	cspH stress protein, member of the CspA family	1.95217	0.596903	1.29906	-3.12243	-1.02449	-4.0769	1.32265	-2.48201	0.149354	-3.43446	-0.257497	-1.58834	-2.308	-3.33734	-3.43738	1.00141	0.442212	0.252046	-1.60189	-2.93143	-3.61587	-1.25715	-1.52576	-1.68031	-0.392982	-0.449053	-1.14796	-1.1653	0.0697551	-0.863774	-5.0919	-4.83927	0.791998	-1.73738	-0.0690514	-1.54773	-2.47461	-0.920428	-1.33732	-1.24333	-1.14361	-0.192617	-0.743385	-1.54894
b0991	ymcE YmcE	0.693969	0.525598	-1.42046	LQ	-1.6995	LQ	-1.1289	LQ	-1.04181	-0.870666	-1.17619	0.242436	-0.508557	-1.03935	-0.690067	-1.03125	-0.409587	-0.553012	-0.702077	-1.58521	1.0738	-1.3385	-0.492031	-0.848875	-0.698141	-0.64498	-0.627468	-1.46789	0.440092	-0.215531	-2.54725	-1.89158	-1.67187	-1.59689	-1.78856	-1.10859	-1.41745	0.0449452	-1.86239	-0.571522	-1.84758	-0.578507	-1.48626	-1.79112
b0992	yccM hypothetical protein	0.691673	0.354978	1.83402	-2.48989	LQ	-0.697015	-0.977759	-1.79075	LQ	-2.64936	-0.278695	-3.22084	2.63658	1.75342	1.67548	2.71327	-0.0287579	0.0915589	-2.69136	-0.600274	-2.29783	4.16027	0.817616	-0.304171	-0.401507	1.41028	0.802952	0.606961	-4.92605	1.62687	-7.98598	-7.67353	-1.56829	-0.825725	LQ	1.61168	-3.12434	-0.117179	-2.01603	-0.66787	-7.90386	2.07012	-4.56595	1.68207
b0993	torS TorS-P his850	-0.675828	0.654644	0.557993	0.946307	-0.230351	-0.471813	-3.01205	-0.646568	-3.01563	0.435359	0.650158	2.47202	0.62432	0.45306	0.202018	0.645131	1.87286	1.95686	0.364176	-0.777224	-0.599619	-1.40999	0.405467	-0.685767	0.520581	0.108442	-0.146304	-0.745898	0.623803	0.288564	-1.48048	-2.22441	-0.194279	0.258898	1.11347	-0.839958	-2.84101	0.624964	-0.107638	-0.0542779	-2.68169	-0.247704	0.268029	-1.57871
b0994	torT TorT-TMAO	0.254754	0.799572	0.173669	-1.13884	-1.49233	-0.375706	-2.12102	-1.57493	-1.46085	0.210188	-0.353615	0.589647	-0.899479	-0.00954797	0.152366	-1.6664	0.662663	1.11689	-0.979234	-3.3143	-2.09776	-1.43181	-0.218748	-2.91584	-1.07098	-0.971028	-0.981783	-0.6495	-1.52611	-0.426054	0.55516	0.762139	-1.12051	-1.73431	-0.757861	0.203703	-3.45313	-0.403043	0.239748	0.244118	-3.65391	-0.802382	-1.91737	-1.48115
b0995	torR TorR transcriptional dual regulator	-1.13803	0.486711	0.408577	3.85403	0.550026	0.690531	-2.93699	-0.966162	0.0456257	-0.215261	2.41533	-0.503405	1.02361	-0.024939	0.702114	0.783483	2.8859	3.47663	2.71685	0.367637	-2.70018	-1.97883	1.62965	0.578053	-0.829233	1.18002	1.45558	1.03076	-0.464203	1.13861	-3.15141	-1.73394	-0.572158	-0.802224	2.31547	-0.234489	-1.98368	2.11977	4.08014	0.445654	-2.68657	0.684099	-2.51343	-2.01869
b0996	torC TorC trimethylamine N-oxide reductase, cytochrome c-type subunit	-0.731709	0.574179	1.20274	3.57252	0.298276	-0.847895	0.282592	-0.551273	1.03498	-1.18027	0.0019946	1.0973	0.462295	0.756725	0.317821	1.43306	1.19484	1.57143	-0.199252	0.488957	-3.26832	-0.656605	-0.0664777	0.328772	-0.383547	-0.0593137	-0.624768	0.295725	-0.0927701	1.30827	-4.01414	-3.80729	-1.15513	-0.58437	0.29114	1.00023	-3.19533	0.704708	-0.121372	0.260125	0.45731	0.162299	-0.985383	0.383376
b0997	torA trimethylamine N-oxide reductase, catalytic subunit	-1.2047	0.648127	-0.259713	0.644886	0.390337	0.433905	-0.75728	1.70929	-1.09501	0.0671906	1.0214	0.867488	0.840299	0.820854	0.618527	0.680252	-0.383069	-0.451494	1.93636	-1.43007	-0.507738	-1.62094	1.59214	1.48173	1.25607	0.427183	0.35161	0.782327	2.52562	0.945363	0.25594	0.685869	0.294927	1.4129	0.68231	0.178708	-0.924682	1.32058	-2.11033	0.264892	-1.67281	0.512168	-0.206538	-1.97448
b0998	torD chaperone protein for trimethylamine-N-oxide oxidoreductase I	-0.382961	0.621055	-0.805037	0.700302	0.714893	0.899153	3.21566	0.285699	-0.639037	1.30381	1.01917	1.82845	0.226186	-1.97277	-1.88121	-0.0632606	0.0102121	-0.620377	-1.23034	-4.8373	-0.270382	-4.63414	1.21584	0.94856	1.14678	-0.0060807	-0.333893	0.367014	1.48376	1.55923	-3.78823	-3.22124	0.116984	-0.731102	-0.22756	-0.612673	-6.34238	-0.376431	-2.54628	2.40708	-1.56604	-1.61371	-4.72414	2.07398
b0999	cbpM chaperone-modulator protein CbpM	-1.60937	0.561572	3.02302	1.31312	1.68596	2.17267	2.09759	1.58549	0.411853	1.1409	1.97701	2.98595	1.03286	3.64284	3.70537	0.138151	0.666172	1.12135	0.671737	0.0527026	0.0494039	1.78171	3.38115	0.436206	2.22293	0.623651	0.884795	2.03079	4.16754	4.11968	-0.193733	0.129923	0.467559	0.802543	0.305065	3.73327	-0.437867	2.38273	-0.294221	1.29287	0.529628	3.69396	0.714212	0.645938
b1000	cbpA CbpA monomer	-0.490529	0.547167	-1.23348	-0.535505	-0.715077	-0.778756	-0.395224	0.705666	-2.86839	-2.01705	0.136509	-1.3852	-0.750759	-0.247416	-0.588249	-0.56719	2.4041	3.33992	-1.65252	-3.34044	0.653961	0.927353	1.56787	1.04865	1.32635	-0.574011	-0.339328	1.60236	-0.497536	1.30068	0.462886	0.707833	1.71568	2.40004	1.19868	2.0416	-1.83846	0.394551	0.355712	-2.4079	-3.9733	-1.82055	1.71634	-2.97922
b1002	agp 3-phytase / glucose-1-phosphatase	0.0574856	0.424731	1.43112	-2.39907	-0.823363	-0.025795	0.627399	0.32654	-5.24407	-2.92927	0.727885	-3.42995	0.338686	0.62333	0.0583418	1.18097	-1.85432	-1.71829	1.36448	3.62759	-3.22466	-0.439036	0.37396	0.454254	-0.142068	0.94109	1.17996	-1.4487	-0.96484	-1.35204	-0.555097	-0.152036	-1.24677	-0.901302	-0.31868	0.238976	0.659471	0.351249	-1.58862	1.83625	-0.466345	-0.437488	-1.57956	-1.04796
b1003	yccJ predicted protein	-0.628659	0.48705	0.375827	0.410944	0.832255	0.896338	0.326613	0.956102	0.20879	1.21874	1.66966	1.45634	1.2041	1.11644	0.973672	1.96398	1.19062	1.16536	0.754673	-0.460469	-0.598977	-0.336076	1.35871	1.34534	1.29047	0.653691	0.84449	0.128532	1.10968	1.3424	0.0603364	0.574434	-0.0741219	0.923147	0.27583	1.68008	-1.00603	1.98715	-0.512677	1.76015	2.05129	-0.378578	1.15852	2.98048
b1004	wrbA WrbA monomer	-1.14063	0.703375	2.53816	0.638828	1.16298	1.18475	-0.314791	1.27476	-1.0979	0.568488	1.70626	1.71635	1.20705	1.55054	1.43857	2.78638	1.88903	1.94102	0.412752	-0.547932	0.407434	-0.0164852	1.45703	0.821525	1.19873	1.33486	1.38724	-0.522394	0.782708	2.85185	-0.226198	-0.0730217	0.746713	0.650063	1.58525	2.28576	0.264927	1.23415	-0.119672	1.60137	0.225742	0.861559	0.230975	0.627421
b1005	ycdF	1.91609	1.15593	-1.44471	-1.72938	-1.16055	-1.45512	-0.499294	-1.60835	-2.06826	-1.54532	-1.93131	-1.56535	-1.6066	-0.937209	-1.44406	-1.35842	-1.96384	-1.64278	-1.14181	-0.946492	-1.5663	-1.20517	-0.703028	-0.99265	-1.23197	-1.11376	-1.42802	-1.20537	-1.62496	-1.56132	-2.69587	-2.38566	-1.20699	-1.09462	-1.40001	-0.62367	-2.42101	-0.459615	-0.774439	-1.11583	-0.717135	-1.70313	-1.31487	-2.3023
b1006	rutG predicted xanthine/uracil transporter	-1.82673	0.921139	-0.260034	1.33929	1.01555	1.64114	2.28077	1.44546	-0.669569	1.99848	1.04955	0.557523	1.81935	0.946971	1.12201	1.20961	-0.429466	-0.104111	2.27622	0.414284	-0.726721	2.06717	2.1549	0.0688436	0.818393	1.66312	2.04397	0.817902	0.557447	1.82694	-1.23754	-1.67578	0.210637	2.31887	0.971995	2.14871	-1.06327	2.26399	-0.330625	2.15413	-1.06392	0.504632	0.252124	2.80404
b1007	rutF predicted flavin reductase	-0.953019	0.734137	-1.17218	-1.32288	-0.379723	-0.159841	-0.270778	-0.721547	-0.88681	-0.702505	-0.234553	0.345428	-0.00983163	-0.226471	-0.106454	-0.708042	-0.44148	-0.716784	0.234951	0.219451	-0.979529	0.6625	0.562318	-1.10937	0.248314	-0.744768	-0.390147	-1.5467	-0.0499844	0.106498	-1.7842	-1.75725	-1.23545	-0.29081	-0.416171	-0.780159	-1.80243	1.64088	-0.823856	0.206638	-1.23103	0.87364	-0.446212	0.285409
b1008	rutE predicted nitroreductase	-0.408379	0.514402	1.69183	-0.486349	-0.664296	0.468945	0.7988	-1.6137	-2.1248	-2.24243	-0.1758	1.36582	-1.35805	0.610761	0.545499	0.545684	-4.58866	-2.64378	3.29412	2.96573	-4.08061	-0.132902	0.328955	-4.10412	-1.53858	-0.0116607	0.174857	-1.2117	-1.93793	-1.58879	-5.42607	-3.94465	-0.827114	0.561837	-3.44835	-1.04732	-4.41513	-1.25803	-0.165266	-2.04434	-4.01038	-1.05143	-1.35997	-0.00933359
b1009	rutD alpha;/beta;-hydrolase	-0.666179	0.674343	-1.23487	-0.84154	-0.590001	-0.434181	-2.58413	-0.599133	-2.2955	0.00648873	0.52555	-0.405131	-0.309043	1.76005	1.80585	-0.45127	-0.0470266	-0.18623	0.758458	2.35087	-0.31822	-2.79174	0.111776	-3.03264	2.42881	-0.535613	-0.448545	-2.51489	0.214483	0.342464	-2.84021	-2.95717	-0.360879	0.653326	-0.327765	-0.565709	-2.49276	0.19467	2.25796	0.761626	-2.13422	-0.0958015	-0.710561	-2.55656
b1010	rutC predicted endoribonuclease	-1.0578	0.718091	2.0638	1.5545	0.640127	1.666	2.43868	1.50442	-0.0469128	0.228752	0.0294225	0.725868	1.1816	1.44101	1.47934	0.199501	0.107716	0.580673	0.103961	-0.192845	-1.1928	-0.283635	0.88548	-0.454221	0.90505	0.921565	0.963726	-1.00925	2.50729	2.44116	-0.630447	-0.617855	-0.796083	0.217737	-1.35668	-0.0538515	0.992027	1.63674	-0.157765	0.644421	0.00117568	0.00950087	0.078847	1.60347
b1011	rutB predicted isochorismatase	-2.43009	0.852226	2.37545	1.32401	0.753785	1.71545	0.539699	0.651451	0.94629	1.86736	1.62631	0.877655	1.73117	1.71229	1.76837	1.01866	-0.347663	0.119362	2.03684	3.42127	-0.67916	-0.234397	1.46132	0.735467	1.45766	1.06944	1.32466	0.848018	3.51113	1.18888	-0.973452	-0.711106	0.615609	1.52194	0.0358079	1.33014	1.35673	1.2036	0.393041	0.888326	-0.321195	1.48182	0.346647	0.903379
b1012	rutA predicted coenzyme F 420 -dependent N 5,N 10-methylenetetrahydromethanopterin reductase	-1.57944	0.597012	1.67141	1.81995	1.48813	1.31773	-0.574039	1.4828	-1.2158	3.21851	0.537083	-0.871964	1.00209	0.888093	0.896143	0.0808407	-0.583945	-0.21443	-0.316422	2.12959	1.5789	-2.30231	0.672804	2.07058	2.31452	-0.0321819	0.608025	0.811888	-0.556202	1.90733	-3.00817	-2.3102	-0.738787	0.305273	0.900775	-0.816804	-3.35118	0.343552	0.883667	0.606425	-3.29197	-1.07715	0.53966	-2.57677
b1013	rutR predicted DNA-binding transcriptional regulator	0.398557	1.21287	-0.990602	-1.46536	-0.473097	-1.24481	-2.11534	-0.281297	-1.94574	-0.970671	-0.153877	0.0966566	-1.18603	-0.865715	-0.740179	-1.3327	0.410599	0.545282	-1.05914	-1.49857	1.08466	-2.20847	-0.551759	0.37179	-0.23119	-0.33889	-0.275826	-0.941678	-1.24841	-1.26289	-2.34772	-2.11448	-1.02185	-1.69641	-0.0597728	-1.74629	-2.31531	-0.386367	-2.06076	-1.27728	-2.1438	-1.22694	0.985787	-2.17099
b1015	putP PutP proline SSS transporter	0.600111	0.52278	0.756107	-1.02562	-2.07139	-2.22775	-1.91585	-2.02472	-5.14843	-4.2077	-1.64555	-2.83959	-0.987306	-0.574698	-0.291487	-1.65695	-1.44168	-1.01216	-1.09572	-2.38797	-0.396254	-2.62785	-0.184575	0.598509	-1.48936	-0.169731	0.181222	-1.88932	-4.04859	-0.0103751	-7.46461	-7.92088	-2.45727	-1.51447	-1.2796	-0.265202	-2.89962	-2.52753	-5.06462	0.104249	-2.95914	-1.07674	-5.98895	-3.63969
b1016	efeU_1 hypothetical protein of the OFeT transport family	-0.843968	0.746583	0.510253	LQ	0.784868	LQ	0.677025	LQ	1.24694	1.18712	0.470178	2.38489	0.464378	1.21193	1.2406	0.410162	0.729164	0.926884	1.71798	0.39076	0.0269024	1.30047	1.53359	1.00053	1.68582	1.06952	1.30535	0.352254	1.9926	2.08532	0.201387	0.253068	0.294983	0.72238	0.283591	0.903374	0.241594	2.31988	0.481193	1.69792	0.240767	0.329432	0.607335	0.385371
b1017	b1017	-0.482795	1.03513	-0.549664	-1.10269	-0.592003	-1.53937	-2.17487	-0.508044	-0.725944	-0.882597	-0.391714	-1.12609	-1.24545	-0.560158	-0.529119	-1.23361	-1.83574	-1.74272	-1.55969	-2.75714	-2.12334	-2.24506	0.253054	-2.08129	1.63602	-0.0081928	0.0845453	-2.14817	-1.46547	-1.283	-2.77153	-2.49532	0.460572	-2.32419	-0.933394	-0.942918	-2.93758	-0.560466	-0.54478	-1.55154	-2.54444	-1.57667	-1.64745	-1.01993
b1018	efeO conserved protein	-1.05157	0.762212	-0.388592	0.711978	0.909031	0.285202	-2.17808	0.943869	0.00836546	-0.992802	0.266273	-0.0633145	0.856269	1.93485	1.36552	0.219198	-0.464533	-0.744985	0.517513	-1.66405	-2.4224	-0.167813	0.987254	-0.645873	1.32536	1.68297	1.63566	0.450135	1.52972	1.3231	2.88353	3.45953	0.97836	-0.734423	-2.02102	1.17481	-2.10809	0.488728	1.6427	0.258113	-1.15847	-0.0250342	2.20396	0.472826
b1019	efeB heme-containing peroxidase	-1.95573	0.989589	-0.0459015	0.304496	0.720266	1.33213	-0.86056	0.0882538	0.91703	0.466451	0.474551	0.445853	1.23933	1.08229	0.925376	0.473304	0.334115	0.63334	1.38998	-0.156089	0.798934	0.513256	0.986332	-0.540541	0.707301	0.82887	0.939347	0.526203	1.26476	0.940323	-0.212884	0.202657	0.157776	1.00437	0.780277	0.573719	-0.226318	0.88431	0.838644	0.534977	3.24367	1.70645	-0.263228	0.995302
b1020	phoH ATP-binding protein	-1.17973	0.7637	2.14246	2.26346	1.14526	2.08232	2.43459	1.96619	1.15114	0.970117	1.9553	-0.23175	1.68739	1.03123	1.18322	1.39393	-0.0212256	-0.104541	0.770784	-1.5614	0.271905	0.137328	1.71608	2.57285	2.10662	0.582692	0.521918	1.50009	0.694305	2.37416	-1.21813	-1.33427	0.490188	1.03628	1.90065	1.48854	-1.66255	1.32704	1.29838	1.4691	-0.644386	3.1667	LQ	-0.468213
b1021	pgaD predicted inner membrane protein	1.94999	0.297846	1.98447	-0.516336	-0.394996	-0.742681	1.08802	1.95677	-2.97214	-8.04035	2.41581	0.821428	0.92509	1.64424	1.32612	1.85027	-2.21636	-2.7018	-0.121448	-7.57628	2.43446	3.00889	-0.635305	0.74636	0.124017	-0.811372	0.326954	2.46386	-0.142043	0.327961	-8.21906	-7.66617	1.29328	-0.089068	0.0863323	0.911639	-0.919035	1.14041	2.40355	1.35799	3.48727	0.192333	-0.0173803	-3.20934
b1022	pgaC predicted N-glycosyltransferase	2.38576	0.547996	0.361277	0.784219	0.440086	0.235428	1.45592	1.23291	-5.33197	-3.31296	1.34083	0.562057	1.33357	1.46927	1.3233	1.60689	0.89633	0.78762	0.640051	0.203268	1.95991	2.28421	0.965878	1.88272	0.938879	1.37549	1.73213	1.00409	0.688642	0.191322	0.817635	1.2973	2.08941	1.2608	0.795667	1.3229	2.68934	0.316406	2.2424	0.702714	2.15455	1.60831	2.04403	-0.457437
b1023	pgaB predicted enzyme associated with biofilm formation	2.03729	0.629214	-1.59567	-0.00825596	-0.217986	0.460413	-1.28935	1.0368	-2.51191	-1.81685	0.636197	-0.00886803	1.11603	0.752729	0.576909	0.475218	0.511086	0.594257	-0.293985	-0.301341	1.38048	1.32327	-0.0324727	1.61936	0.299909	0.526598	0.876864	1.65673	-0.0427216	-0.571132	1.0321	1.5617	1.06526	0.991427	0.578977	1.9358	1.73865	-1.59519	1.64516	-0.594269	1.7577	0.28648	2.33301	1.2291
b1024	pgaA predicted outer membrane protein	1.46704	0.232106	0.395606	-0.127749	-1.49959	-1.66749	3.28148	-0.612487	-5.91149	-6.70696	0.271642	0.448209	0.35018	0.523075	-1.0236	1.64822	-0.933936	-0.428412	0.762028	1.28021	0.613881	1.13474	0.941134	0.548705	0.726293	0.937252	0.720876	0.251645	1.5917	1.56092	-2.02244	-1.7678	0.398139	-0.255144	0.162605	0.86732	0.977851	-0.322691	-0.821745	0.364484	-1.82778	0.546114	-0.60963	0.066993
b1025	ycdT predicted diguanylate cyclase	0.882095	0.78258	-0.107566	0.645327	0.689593	-1.15652	0.611329	-0.186553	-0.194517	-3.06418	0.993567	0.431014	0.297326	0.591011	0.341175	0.388302	1.26929	0.87859	0.380701	1.25964	2.00076	2.00924	0.214401	2.02407	0.670715	1.94466	1.94029	1.37905	0.530599	0.874443	2.61904	2.22168	2.05033	1.77581	2.32719	1.41381	2.23524	0.977609	2.43488	0.639468	0.792692	-0.780393	3.06177	0.0502709
b1026	insF-4 IS3 element protein InsF	0.615659	0.38843	0.194757	-0.0368079	-1.24359	0.0689994	-0.862399	0.507081	-4.4953	-4.182	0.349319	0.316028	0.957384	0.490093	0.923976	0.357317	1.64588	2.01967	1.29643	2.42835	-0.395602	0.371544	0.360746	-0.359947	0.77032	0.523708	1.53794	-0.29954	0.0555274	0.34805	-0.333722	0.645884	-0.652136	0.764873	-0.249142	0.162008	0.504051	0.129874	-0.573875	0.206081	0.428533	2.45308	-0.264674	1.40894
b1027	insE-4 IS3 element protein InsE	1.02497	0.503787	-1.2308	-2.07675	-1.5247	-1.93398	-1.10425	-1.40889	-2.95318	-2.68692	-1.08654	0.804739	-1.05578	-0.325972	-1.3721	-1.36459	1.69451	0.531159	1.63109	1.93465	-1.09431	0.65589	-1.16827	0.800595	-0.790613	0.408826	-0.570376	-1.06109	-0.602939	-1.06478	-4.8001	-3.87766	0.77191	0.0652222	-0.958169	0.26595	1.18928	0.167541	0.848377	0.614575	-3.56117	-2.20506	-1.12454	0.129695
b1028	ymdE putative malonyl-CoA:Acyl carrier protein transacylase	1.09749	0.404959	-1.80149	LQ	-2.04534	LQ	-0.582747	LQ	-2.87282	-3.17705	0.686056	-2.22875	-0.65331	-1.02341	-1.93002	-0.468216	2.11288	1.51324	-0.94016	0.54244	0.0954278	0.871403	-1.30982	0.101993	-1.30199	0.316712	0.0346662	-1.32082	-1.64719	-1.67625	3.43773	3.40085	-0.583017	-0.481944	-1.97278	-1.21563	-0.704377	-1.29634	1.39903	-1.20971	-3.95819	0.0293365	2.59712	-1.11161
[truncated: 3,067 more rows]
