# Supplementary material for: Genetic Architecture of Intrinsic Antibiotic Susceptibility
Source: PLoS One. 2009 May 20;4(5):e5629. doi: 10.1371/journal.pone.0005629 (PMC2680486; doi:10.1371/journal.pone.0005629)
Supplement: Dataset S4 — Z-scores for individual hybridizations computed relative to six hybridization of the library cultured in the same media (M9 with glucose and casamino acids) without antibiotics. (3.58 MB XLS) [file pone.0005629.s023.xls]

## Sheet: S4-z relative no antibiotic
Dataset S4: z-scores for individual hybridizations computed relative to six hybridization of the library cultured in the same media (M9 with glucose and casamino acids) without antibiotics.
Note that repetitions two and three for PIP, FOX, TET, TRM are technical, not biological, replicates and were averaged.
LQ= Low quality array data
Average is the average of the six no antibiotic controls; stdev is the standard deviation with the global component added in.
bnum	Description	Average	Stdev	AMK_R1	AMK_R2	GEN_R1	GEN_R2	STR_R1	STR_R2	TOB_R1	TOB_R2	AMP_R1	AMP_R2	FOX_R1	FOX_R2	FOX_R3	PIP_R1	PIP_R2	PIP_R3	LOM_R1	LOM_R2	NAL_R1	NAL_R2	SLF_R1	SLF_R2	TRM_R1	TRM_R2	TRM_R3	DOX_R1	DOX_R2	TET_R1	TET_R2	TET_R3	ERY_R1	ERY_R2	FUS_R1	FUS_R2	BLM_R1	BLM_R2	NIT_R1	NIT_R2	DOX_R3	SLF_R3	AMP_R3	LOM_R3
b0002	thrA aspartate kinase / homoserine dehydrogenase	-0.562213	0.862868	0.974146	1.30649	1.12467	0.830862	0.248826	-0.893689	1.56594	2.52705	1.42596	1.64975	1.1559	1.00625	0.671865	0.212598	2.34155	2.43536	0.782103	1.64044	-0.945403	1.23239	1.43926	0.86647	1.02341	0.352149	0.445067	0.530658	1.12291	0.740329	-1.04319	-0.711809	0.771463	1.198	1.0506	0.755033	-0.686454	0.615572	-0.860742	0.777346	-1.35567	0.552706	-0.859453	-1.62355
b0003	thrB homoserine kinase	-0.194381	0.552022	1.02692	-0.488979	0.22845	0.623908	-1.44171	-1.98499	1.18447	2.76048	1.00156	-2.35435	0.707595	1.0958	1.12231	1.57781	-0.505881	-0.263405	-0.908251	-1.25039	1.44838	-3.72125	0.0045996	-0.268867	-1.85829	-0.342955	-0.54304	-0.0979622	0.2139	1.22717	-5.14307	-4.80452	-0.332253	-1.92822	0.0189923	0.96257	-2.94774	0.041802	-1.97559	0.160563	-3.10654	0.858965	-3.64125	1.14465
b0004	thrC threonine synthase	0.00879494	0.593449	-1.31552	-1.59406	-0.754776	-0.054749	1.07824	-3.44344	0.583378	1.10072	0.251476	0.961229	0.157723	0.772615	0.770639	1.4275	-0.0163852	0.244109	1.71911	-1.80189	-0.672279	0.736287	-0.106847	-3.09341	-0.0618293	-1.43169	-1.31231	-0.571301	-1.2146	1.25547	-2.62123	-2.57047	-0.804834	-2.44344	-1.6925	-0.139543	-0.880479	0.299214	-4.28458	0.763426	-4.33284	-0.894803	0.867131	0.750152
b0005	yaaX predicted protein	-0.216255	0.561634	-1.57136	1.18586	0.730818	1.76617	1.48319	-1.28129	0.971841	0.98671	0.0056583	2.7117	-0.170814	-0.336673	-0.195334	1.92339	-2.31496	-2.07704	-1.65371	5.8124	0.329485	-2.5518	2.28665	-0.682476	1.79325	-0.0234784	-0.303984	-0.283285	0.144894	-1.06266	-3.76296	-3.34741	-0.0673574	-2.69076	-0.857877	-0.548437	3.42309	0.755483	-2.76057	2.40064	-3.31285	-0.314139	0.109745	-1.57652
b0006	yaaA conserved protein	-0.424929	0.957823	0.696391	-0.830751	0.553011	1.13026	-0.0468965	-0.881399	1.7662	1.12032	0.727546	-0.510092	0.0530604	0.982677	0.873958	1.78975	-0.288199	-0.465558	-0.912713	0.370286	-0.149486	-1.21698	1.14129	1.25907	-0.0515542	0.845468	0.539847	1.11348	1.10124	1.24201	-1.09461	-1.15179	0.736536	-0.608931	0.737378	0.880207	1.04552	2.25526	-1.71976	0.338712	-2.26796	1.37216	0.467284	0.174844
b0007	yaaJ YaaJ alanine AGSS transporter	0.0839163	1.26954	0.0605878	0.292129	0.492949	0.3668	0.200847	-0.977111	0.0937902	0.838172	1.22573	1.24806	0.71444	0.726869	0.818517	1.35822	0.724408	0.861819	0.609382	0.395016	-2.64912	-1.26386	-0.0846982	0.493284	-1.25025	-0.509969	-0.437956	0.359234	0.218663	0.738374	-2.56749	-2.89572	-0.269245	-0.0326093	-0.423254	-0.138913	-1.59183	0.149586	0.335065	0.350508	-1.53961	0.120893	0.577112	-0.44163
b0008	talB transaldolase B	-0.280829	0.792709	1.65666	-0.421666	0.893825	1.72446	1.27058	-0.628437	3.51319	3.48109	-0.832353	0.3359	-0.34481	-0.459568	-0.584649	-1.0631	0.30968	0.154434	-0.247664	-1.64052	2.56501	-0.504155	0.598026	1.07493	-0.936239	-0.447992	-0.421955	-0.879647	-0.0651435	-0.925872	-3.01616	-3.61356	-0.449406	-0.00216511	-2.10788	-0.196225	-0.808068	1.31247	0.179134	-0.269961	-3.06717	-0.745481	-2.17247	-0.695643
b0009	mog predicted molybdochelatase	-0.400871	0.503207	-0.453087	-0.205637	0.806145	0.237018	-2.56243	-1.94732	2.07187	3.71805	0.455024	0.342096	-0.231223	1.01314	0.481538	0.958638	1.8232	1.19439	-0.191038	0.553208	-1.3612	-2.8173	0.118736	0.31211	0.78935	0.110128	-0.441643	-0.251598	1.43487	0.27208	-2.931	-3.33072	-0.303651	-3.34073	2.15466	-0.6956	-4.55324	-0.643109	0.209926	0.810554	-4.53004	-0.62477	-0.206812	1.32961
b0010	yaaH conserved inner membrane protein associated with acetate transport	-0.486595	0.891312	-0.0853596	-0.824254	0.761519	0.627389	-0.412668	-0.780311	1.16935	0.720582	-0.12377	-0.363497	-0.106414	0.0622136	-0.272602	0.0208372	1.56775	1.35955	0.029522	1.58874	-1.0599	-0.255254	1.38649	0.646066	0.598532	0.311891	0.00823538	-0.602734	-0.899883	1.21355	-1.91222	-1.47206	0.137093	-0.824669	0.0290226	1.76668	-2.24743	0.194596	-1.65205	0.571657	-2.42277	0.00528295	-1.18782	-0.08006
b0011	yaaW conserved protein	0.525752	0.983424	-1.12655	-0.87597	-0.347883	LQ	-1.51467	-0.86435	0.736428	-0.140539	-0.0121797	0.733346	0.114279	-0.497849	LQ	-0.118875	-2.26139	-1.27219	-1.4542	1.15462	-0.298203	-0.508751	-0.439137	0.215136	-0.115884	-0.0925524	LQ	-0.747337	-0.0641509	-1.6596	-0.178188	LQ	-0.282382	-0.212281	0.0520847	-0.540869	-0.133393	-0.567121	-0.831807	-0.925923	-0.916717	0.351216	-0.202454	-0.296026
b0012	htgA predicted DNA-binding transcriptional regulator	0.654147	1.21224	-1.58152	-0.287993	-0.242394	-0.813941	-2.15303	-1.02457	0.752218	0.085948	0.18741	0.819729	0.348377	-0.485114	-0.628638	0.0750594	-1.71922	-1.55737	-1.26006	0.87506	-0.148736	-0.724776	-0.143631	0.117241	0.0477302	-0.0367788	-0.26056	-0.795652	-0.0502507	-1.0816	-0.606047	-0.599108	-0.0706092	-0.321557	0.243192	-0.719932	-0.142142	-0.265065	-1.04983	-0.862736	-1.91053	0.522512	0.0126656	0.0787902
b0013	yaaI predicted protein	1.04312	0.696616	-2.21982	-1.15789	0.626549	-1.16254	-2.78541	0.598732	-0.672841	0.238187	0.588592	0.241377	-0.44739	-1.63779	-1.45088	-1.62982	-1.5567	-1.72889	0.265036	2.584	1.16693	1.33121	-0.459494	-0.0418634	1.76449	0.238474	0.0112987	-1.29599	-0.0924919	-1.63149	2.16392	1.12657	1.46519	1.76267	2.03048	-0.722918	2.38692	0.965076	0.160198	0.762626	2.02371	-2.21982	0.443275	0.044308
b0014	dnaK chaperone Hsp70; DNA biosynthesis; autoregulated heat shock proteins	-1.81172	0.555505	5.1246	8.52887	9.07688	8.39525	0.272143	2.62623	4.04245	5.83135	-0.116013	1.18284	1.11772	1.69346	1.6989	-0.804758	1.76473	1.33324	2.44084	-0.66354	2.81119	1.07566	1.00259	0.931626	1.10587	1.72002	1.13625	0.171309	0.958162	1.29156	-0.829129	-1.22304	0.219978	-0.251827	0.105964	1.66905	1.54643	1.70887	2.82538	0.469181	-0.6842	-1.87776	0.618292	0.879717
b0015	dnaJ chaperone with DnaK; heat shock protein	-0.45024	0.498252	2.6057	5.40885	5.51691	3.14678	0.345296	-3.39457	2.79704	-0.131966	1.86327	-1.62762	4.24418	4.58594	4.52733	3.39522	3.55463	4.21443	1.25588	-0.580903	8.12052	5.22162	0.558566	-2.18804	-0.96163	0.490059	0.514136	0.165178	-1.23363	-0.639865	-3.13534	-3.60289	0.615611	1.21768	-1.00897	1.43776	1.28975	3.43092	-4.05394	-1.39953	-2.37298	-2.25184	2.75687	4.47579
b0016	insL-1 IS186/IS421 transposase	-0.106805	0.425999	0.237539	1.06449	-0.335546	1.5924	0.00530144	0.071898	0.0718138	-1.9594	0.585329	-2.71679	0.693097	0.0292123	0.029985	1.01589	-0.771952	-1.17792	-3.91611	1.13223	1.93376	0.614517	1.64906	0.326559	-0.0397468	0.194442	0.271758	-0.237948	1.5851	-0.404511	-2.53127	-3.0746	-1.15856	-1.25153	-1.09437	0.590323	1.34601	-0.519262	0.0623323	0.538813	-3.41502	3.12566	-0.416222	0.972753
b0017	yi82_1	-0.647903	0.616762	0.188965	0.314973	0.186997	1.75636	-0.746394	0.694843	2.0764	-0.346447	0.974725	-0.671317	1.32763	0.794561	0.71878	1.65155	-1.14548	-0.805007	-1.18154	-1.22935	-0.291184	1.68661	1.64303	0.177531	0.791578	-0.636377	-0.0440859	0.0883321	0.819816	-0.204725	-2.84371	-1.98727	-0.538161	-0.246274	0.593875	0.562539	0.127738	0.647056	-0.962021	1.76807	-2.48443	3.58722	-1.32086	1.07069
b0018	mokC regulatory peptide whose translation enables hokC (gef) expression	0.482986	0.56232	0.258792	LQ	-0.374618	LQ	0.240875	LQ	-0.393767	-0.52917	0.533879	1.52021	-0.116056	0.122881	LQ	0.960633	0.910041	LQ	0.668128	0.958009	1.19642	LQ	-0.161731	LQ	0.0841075	-0.341291	LQ	-0.263321	0.87483	0.0939323	0.423443	LQ	1.581	-0.224306	0.632453	-0.588669	-1.54173	0.395256	0.0238342	0.337791	-1.36718	-0.0430598	-0.636366	-1.21612
b0019	nhaA NhaA sodium/proton transporter	-0.781487	0.874495	-2.00812	-0.523041	-1.38336	-0.301378	-2.14091	-0.727004	0.420336	-0.180722	-0.022383	-0.782121	-1.31293	0.735677	0.913475	-1.14851	0.365629	0.292477	-0.845716	-2.05359	-1.90489	0.0896848	-0.26368	0.680224	-0.808726	0.621679	0.439834	-0.601819	2.40307	-0.587629	-1.3457	-1.37443	-0.291399	-1.2435	-2.15967	0.413589	-1.44553	-0.264898	-1.63997	0.44972	-2.31082	-1.0442	-1.02639	-1.1986
b0020	nhaR NhaR transcriptional activator	0.192502	1.16479	-1.2653	-0.556186	-0.28265	0.0326973	-2.09264	-0.648458	-0.40439	0.295418	0.170197	-0.574312	0.425733	0.12532	0.021162	0.495215	-0.190949	-0.274124	-0.739363	-2.08936	-0.0073589	0.347333	-0.20187	0.214195	-0.883232	0.496292	0.387702	0.213349	-0.912526	-0.218745	-1.9851	-1.67822	0.140039	-0.515208	-0.448832	0.427837	-1.6571	0.737048	0.894889	0.549973	-1.79489	-0.31179	0.538562	0.287588
b0021	insB-1 IS1 protein InsB	0.820062	0.550803	-2.05113	-0.192084	-0.578845	0.00514286	-1.75343	0.490407	-2.29714	-0.583545	-0.424501	1.35978	-0.0252799	1.47334	1.98498	-0.380825	1.35826	1.80905	-0.256764	2.01331	-0.12501	0.85606	0.543652	-0.0806288	0.540928	0.104426	0.71933	0.479919	-0.780588	-0.731936	1.30065	1.35752	-0.478805	-0.15956	0.311061	0.534048	1.89863	-1.45228	-0.0974322	0.219477	0.528959	-0.514515	0.983589	-1.2437
b0022	insA-1 IS1 protein InsA	0.490357	0.593805	-1.27347	-1.36737	-0.934986	-0.0108461	-1.09629	LQ	-0.724505	-1.24848	-0.673559	0.0760083	-1.08581	0.280845	0.0693784	-0.967573	-1.33211	LQ	-1.49714	0.542682	-1.21482	-0.672707	0.403063	-0.736388	-1.27814	-0.360613	-0.526359	-0.573412	1.61221	0.671271	-2.29443	-2.08565	-0.903206	-1.52779	-0.0294879	0.0494835	0.362565	0.781547	-0.268519	0.305703	-1.45654	0.372347	-0.361534	0.518554
b0023	rpsT 30S ribosomal subunit protein S20	-0.399973	0.623682	0.0363217	LQ	0.672394	-0.0268786	-0.717953	0.050199	0.573336	0.964654	0.106793	0.86502	-0.382576	0.375658	0.501257	-0.853941	-0.333387	-0.434403	0.41305	-0.498615	-1.3513	-0.491027	1.11923	-0.329055	0.380489	0.240261	0.280112	-1.45425	0.609773	0.882458	-1.06351	LQ	-0.886162	0.0302119	-1.30001	-0.0463992	-0.714406	1.14799	-0.355241	0.563109	-0.940399	-0.83189	-0.277728	-0.899722
b0025	ribF bifunctional riboflavin kinase / FMN adenylyltransferase	-1.85905	0.876687	0.189769	2.11299	1.38169	1.35584	1.64289	1.39376	1.80528	2.28128	0.84178	0.901014	0.774714	1.24596	1.05706	0.199262	-0.083731	-0.0899397	0.274079	-0.887931	-1.5051	-1.11257	0.293016	-1.17777	1.12963	-0.306355	-0.405031	-0.360702	0.758019	1.59071	-0.575526	-1.12756	-0.545115	-0.56055	-1.04946	-0.544173	-1.20228	1.16833	-0.944718	0.296181	-0.873116	-1.02918	1.27296	-0.914744
b0026	ileS isoleucyl-tRNA synthetase	-1.36318	0.429929	-3.73329	-0.183028	-3.78432	0.355433	-3.15903	-0.447689	-5.10388	1.3153	-3.20335	2.417	-3.52217	0.74401	0.706944	-3.5722	0.435537	0.0104257	2.15174	-0.337034	-5.40007	0.164928	1.69943	-0.369336	1.85951	0.341316	0.37034	-4.74716	2.25712	2.4671	-0.679005	-0.985539	-3.96389	0.297114	-6.33863	0.215664	-0.466916	2.81784	-0.5859	1.63142	-0.559914	-3.8862	0.0648792	-3.33455
b0027	lspA prolipoprotein signal peptidase II	-2.00346	0.67223	0.822525	-0.457889	-0.28254	1.51802	0.552498	-0.201081	-0.0164174	0.71019	0.234086	0.923825	0.285674	0.650103	0.215001	0.18382	-0.589301	-0.723976	0.687544	-1.00416	-0.404826	-1.1247	0.825725	-0.665829	0.656979	-0.506606	-0.892182	1.73424	1.09876	1.37078	-1.25214	-1.16822	-2.02701	-0.136879	-1.86339	-0.394543	-1.29055	1.41749	-0.512251	0.648313	-0.645277	0.109606	-0.633478	0.503674
b0028	fkpB peptidylprolyl isomerase	-1.88395	1.00623	2.6122	-0.987596	2.75214	2.18759	0.981219	-0.911465	1.9766	0.28274	-0.463176	0.00705153	0.139734	0.489868	0.331232	1.51476	-0.93787	-1.15466	-0.271977	-1.19283	1.41147	-0.994421	-0.405822	0.0760253	-0.30145	-0.28255	-0.0715254	0.0306624	1.70713	0.611569	-1.40723	-1.05148	-0.553072	-1.02618	-0.852187	1.16781	-1.29873	0.977723	-0.900885	-0.295949	-1.49944	0.597048	-0.658951	0.786945
b0029	ispH 1-hydroxy-2-methyl-2-(E)-butenyl 4-diphosphate reductase	-1.51095	0.557948	0.0902678	-0.830411	0.4893	0.690961	-0.707094	-0.639201	0.244103	0.486979	0.911905	0.335122	-0.283781	-0.0399164	-0.0786005	-0.213737	-0.326112	-0.861847	0.886967	-1.29727	-0.710405	-0.821088	1.0801	0.683875	0.124806	-0.129933	-0.160672	0.549869	0.89354	0.720489	-0.612775	-1.26842	-0.128633	-1.08562	-1.39218	0.314734	-1.35618	1.84692	1.04865	2.55133	-1.35989	1.50784	0.963412	1.46015
b0030	rihC ribonucleoside hydrolase 3	-0.0243102	1.10395	0.569164	-3.53622	-0.6414	-0.376591	-0.749102	-0.631308	-1.73578	0.11101	0.299253	-2.72636	-0.220353	-1.3132	-1.52586	-0.197573	-0.424256	-0.902463	-1.91438	0.0987839	-1.05945	-1.06685	0.128093	0.14852	-1.43235	-0.496481	-0.728752	-0.387806	0.864891	0.666631	1.12982	0.791693	-0.119695	-3.54011	0.485154	0.346591	0.584374	0.926945	0.230317	-1.36051	-3.65783	0.43825	-0.0136047	0.675438
b0031	dapB dihydrodipicolinate reductase	-2.46554	0.341114	-0.318156	-3.16301	1.30307	3.51884	-0.288537	2.37659	0.198008	3.6554	4.8531	0.939811	1.26921	-0.0543886	-0.112481	2.59975	-0.632635	0.699416	0.567763	-1.55034	0.306631	-2.09993	1.58267	-0.58048	0.732334	0.259754	1.21594	0.502054	2.58428	2.39747	-1.83	-0.96112	-0.655616	-0.99114	-1.91428	0.688631	-1.61108	2.74578	-1.83973	0.693298	-2.51644	-0.219102	-0.238182	0.763745
b0032	carA carbamoyl phosphate synthetase	-2.85375	0.583015	-0.797219	0.878556	2.46844	2.59526	4.86654	0.0946723	1.85747	1.44521	1.82874	1.438	0.87032	0.603514	1.03532	-0.612772	0.32706	0.0616838	1.19141	-0.684202	-1.40568	-1.14834	0.883697	-0.713587	2.70011	2.01113	2.07407	-0.957606	1.13419	1.46153	-1.01815	-0.805949	-0.709775	-0.307903	-1.71962	-0.951313	-1.29436	1.85925	-1.27568	0.890412	-1.07277	-0.127556	-0.0703893	1.52427
b0033	carB carbamoyl phosphate synthetase	-1.4489	0.534849	0.771467	2.32003	0.904526	1.27568	-0.195984	0.869686	LQ	1.30166	0.709073	1.28782	-1.16777	0.575145	0.807796	0.139037	0.796563	1.0798	0.564581	-0.323669	1.09342	-0.797403	0.868151	0.183547	1.58217	0.634927	0.989119	0.039035	1.36298	0.996603	2.02908	2.52109	0.299613	1.07727	0.717162	-0.127333	-0.278895	1.76541	0.153414	0.888834	0.0902618	-1.46074	1.61986	-0.786029
b0034	caiF CaiF transcriptional activator	1.30876	0.330946	1.81459	-2.40818	0.897248	-1.50717	2.06883	-1.3528	0.565701	-2.85383	2.75831	0.457082	2.00676	-0.181892	-1.3297	1.36665	2.67823	1.14176	-1.90602	-4.23893	3.18941	-1.0156	0.778169	-2.27612	0.449925	0.837702	-0.410095	0.936738	0.00841376	-1.68038	-0.192522	LQ	2.36013	-0.698323	2.70331	-0.340594	-1.06102	-0.783964	-1.29032	-0.326279	-3.12049	2.92485	0.359995	1.08903
b0035	caiE caiE protein	0.719762	1.10058	0.562823	-0.726505	0.0331469	0.0271834	-1.55771	-0.160354	-0.78705	-0.401008	0.488847	0.494109	0.31011	0.257816	0.401537	0.725362	-0.476498	-0.248003	-0.249541	-0.611701	-1.12454	-0.13383	0.35053	0.246152	0.880252	0.152459	0.288747	0.44642	0.480783	0.136957	-1.39764	-0.782623	0.105791	0.162474	0.63583	-0.0575002	0.0403066	0.154201	0.493755	1.05403	-1.83472	0.693255	-0.700336	-0.691439
b0036	caiD crotonobetainyl-CoA hydratase / carnitine racemase	0.690954	0.66557	-1.1655	-0.579365	-1.14152	0.475198	-2.13196	0.25959	-1.61219	-0.203699	0.381622	-0.184802	0.640577	-0.616806	-0.739123	0.157826	-0.181004	-0.476678	0.946519	-2.29415	-0.369443	-0.68572	0.611863	-1.02861	-0.540166	-0.379344	-0.184688	-0.318014	-0.290119	-2.29123	0.617333	0.445645	-1.22219	-0.821668	0.0545745	0.445254	0.661312	-0.497904	0.646893	0.094256	0.479279	1.7153	-0.827589	0.33625
b0038	caiB CaiB monomer	-0.00202524	1.06837	0.967295	0.0533052	0.757146	1.06133	2.85217	0.176882	0.570102	0.305514	0.236645	0.171997	-0.0765086	0.364698	0.506345	0.488599	-0.743457	-0.546165	0.889498	-0.943226	0.185012	-0.651119	0.455221	-0.410246	0.213749	-0.0733503	-0.00617823	-0.318767	1.32387	0.0189283	-2.58017	-2.35534	-0.20006	0.257724	-0.649972	0.328213	-0.380281	-0.489366	0.256909	0.0765825	-2.1907	1.01253	-0.916529	0.518384
b0039	caiA crotonobetaine reductase	0.287141	0.767118	1.51517	-0.76058	0.833405	0.31694	-0.347123	0.308241	-0.162569	2.085	0.350264	0.464342	0.2521	0.394931	0.390295	0.56308	-0.74995	-0.890387	0.50076	0.864425	1.89663	-0.466192	0.37804	-0.649174	1.02399	-0.126581	-0.130653	0.382372	0.413365	0.000746445	-1.99665	-1.9063	0.378217	1.11036	0.790545	-0.213148	-1.99836	-0.259153	-2.30689	-0.180832	0.446727	1.35077	-0.143651	-0.914929
b0040	caiT CaiT carnitine BCCT transporter	0.319851	0.929324	-0.679093	-0.653349	0.240295	-1.25376	-0.547268	-1.00464	-1.15518	0.199059	0.457953	-1.7607	-0.933925	0.202721	0.133738	-0.454516	0.695129	0.745977	-1.17495	-1.69538	-0.468963	0.127491	-1.16791	0.468469	-0.125887	1.07787	1.10902	-0.0329596	-0.767505	-0.133267	2.02383	2.12188	1.13401	0.694963	1.87506	0.183267	-0.460411	-1.09444	1.29131	-0.137939	1.01722	-0.741243	1.53754	-1.95851
b0041	fixA probable flavoprotein subunit required for anaerobic carnitine metabolism	1.10745	0.509343	0.281594	0.15042	-0.959374	-1.57402	-5.55635	-3.89976	-2.57379	-1.03848	-0.0364136	-0.308685	-0.685134	-0.824535	-1.51239	-1.57175	-4.73059	-4.50559	-2.53261	-7.79911	-2.94323	-1.55545	-1.30823	-0.341394	-0.293888	-1.02261	-1.04333	-0.995086	-0.241595	0.233634	-0.053003	-0.450341	0.267924	1.51663	0.0644147	-1.90173	-2.74222	-1.90747	-1.78397	-0.236966	-1.36664	0.0927536	1.30693	0.897923
b0042	fixB probable flavoprotein subunit required for anaerobic carnitine metabolism	-0.434791	1.1028	0.462677	-0.714165	0.455977	0.163994	-1.25878	-0.640361	-0.0961594	1.36691	0.290603	0.850754	0.276233	0.375064	0.23187	0.240313	0.220097	0.19768	-0.524506	-0.0215108	0.0511658	-0.526249	0.81024	-0.0751251	0.225809	0.0536528	0.0622101	-0.0026668	0.529099	0.044877	-1.84549	-1.42847	-0.0404961	0.182443	-0.177301	-0.338782	0.494073	0.81015	-0.671438	0.473636	-1.88598	0.380304	-0.921898	0.1189
b0043	fixC flavoprotein (electron transport), possibly involved in anaerobic carnitine metabolism	-0.802927	0.969902	-0.635497	-0.881425	0.675988	0.939165	-1.71644	-0.353576	1.22106	1.68393	0.580815	-1.59491	0.320815	0.595121	0.676501	0.555334	0.0388325	-0.0398866	-2.36053	-0.652706	1.07182	-0.814591	0.231995	-0.335869	0.347184	-0.37423	-0.150281	0.0171721	-0.172006	-0.765023	-0.067225	-0.467854	0.392376	1.00537	0.103366	0.307593	1.4066	-0.758376	0.16715	-0.597021	-2.77245	1.01874	0.844643	-1.80148
b0044	fixX putative ferredoxin possibly involved in anaerobic carnitine metabolism	-0.477504	0.793569	0.0965583	1.33654	0.437464	0.120588	-1.46248	-0.384962	-0.365612	0.767077	0.789574	-0.586015	1.41858	0.480987	0.68499	-0.00955689	-1.67603	-0.756095	-0.949867	-1.54643	-1.27555	-0.630516	1.51044	-0.903716	1.25197	-0.44635	0.136943	0.615214	-0.118162	1.76127	-2.45449	-1.97289	0.145445	-0.311914	-1.98889	-0.191956	3.08458	0.564668	-0.478717	-0.706812	-1.68377	-1.40972	-1.12218	-1.5067
b0045	yaaU YaaU	0.622559	0.706211	0.582636	0.294957	-0.444043	0.305568	2.12187	-0.845026	0.876453	-0.0708259	-0.889046	-1.15023	-0.118259	0.180992	0.402511	-0.682363	1.11768	1.26455	-1.67832	-1.09192	1.03068	-0.484057	0.376572	-1.11985	-0.251587	0.326238	0.417095	-0.203136	0.39514	1.18878	-5.15658	-5.55627	-0.596061	-0.781744	-0.39665	-0.627865	-0.221172	-0.335714	0.429778	0.791475	-5.56011	0.663504	-1.48875	1.25549
b0047	kefC KefC potassium CPA2 transporter	0.226675	0.864104	0.467002	0.702703	0.165977	0.00149515	-1.59086	-0.549174	-0.165605	0.661126	0.445812	-0.982048	0.0572387	0.63911	0.996147	0.362455	1.12782	1.51981	0.480507	-2.87579	0.495371	0.127189	0.618785	-0.519156	1.09997	-0.0347802	0.0287951	0.00836796	1.43201	-0.527097	-1.10692	-1.06583	-0.0726058	-0.0422802	0.447568	-1.04289	-0.367897	0.206997	-0.501602	0.733084	-0.22489	0.26254	-1.28908	0.559706
b0048	folA dihydrofolate reductase	-1.25347	0.992012	-0.375273	-0.0202201	-0.547264	1.25355	-0.871493	-0.210825	0.728179	0.362373	-0.029968	-0.2054	1.13034	1.10922	1.17298	-0.659743	0.593868	0.81957	-0.182119	-1.39167	-1.2434	0.145407	0.733264	-0.296601	0.1078	-0.00584735	-0.118891	1.0997	-0.040683	0.195542	-0.574006	-0.084574	0.297446	-0.543432	0.772857	0.318172	-1.14614	0.617192	-1.11992	1.15398	-1.15421	-0.342499	1.4657	1.11332
b0049	apaH diadenosine tetraphosphatase	-1.56111	0.800097	1.91267	0.128227	-0.707757	1.16951	0.920938	1.50556	0.694088	-0.655001	1.15675	-0.373141	0.501522	-0.14669	-0.00902671	1.14686	-1.09259	-1.02022	-0.468771	-1.75544	-0.707992	-1.44952	0.462884	-0.343767	0.835344	0.58422	0.631718	0.564042	-0.210799	2.59834	3.35456	3.88686	-0.735041	2.45839	-0.545267	0.0776761	-1.75629	0.661747	-1.92293	-0.625578	-1.67079	-0.682879	0.152199	-0.33625
b0050	apaG hypothetical protein	-1.36133	1.03474	0.0363161	1.99563	0.588388	0.471029	2.32977	1.25539	0.527424	0.0444535	1.30632	0.260639	1.28112	0.931654	1.13244	0.445795	-0.8911	-0.391231	0.0812675	-0.490843	0.29582	-0.672336	1.50507	-0.765369	2.27146	2.19916	2.02406	0.99909	0.57208	1.86901	4.461	4.31664	1.03991	2.75226	1.73918	0.60976	-0.42961	0.826784	-0.909594	0.226611	-0.0869817	-0.216097	2.57777	0.968429
b0051	ksgA S-adenosylmethionine-6-N',N'-adenosyl (rRNA) dimethyltransferase	-1.21559	1.56203	-0.284618	-0.0154821	-0.532072	-0.125187	2.2361	1.39448	-0.675759	-0.358661	0.054187	-0.367028	0.916172	0.961512	0.95547	1.21555	0.0134106	-0.429707	0.470006	0.273781	0.657006	0.378712	0.534315	-1.00285	1.08932	0.385404	0.445979	0.0306399	-0.2534	0.341883	-0.391782	0.0878277	-0.0836306	0.0428458	0.137759	-0.33388	1.40994	0.629494	-0.60544	-0.361113	1.15464	0.0935968	0.0245264	0.387851
b0052	pdxA 4-hydroxy-L-threonine phosphate dehydrogenase, NAD-dependent	-2.49695	0.868835	-0.441206	0.265088	-0.689036	0.1455	2.05244	1.80043	-0.680909	1.13075	0.62838	0.649754	1.41093	1.31458	1.20686	0.0114891	-0.574431	-0.323238	0.769241	-0.647444	0.213736	0.613025	1.50638	-0.932242	1.05525	-0.211711	0.0452908	-0.122907	1.75383	0.766174	-0.721598	-0.764895	0.505154	1.58557	-0.970065	-0.67133	0.0502654	1.62585	2.15024	0.0861342	-0.500635	-0.479504	-0.494303	1.78382
b0053	surA peptidyl-prolyl cis-trans isomerase (PPIase)	-3.11719	0.853692	0.102371	-0.474485	1.48443	0.30077	0.62349	-0.0287621	0.494079	1.8844	1.10206	1.24193	0.917247	0.468823	0.518255	0.167005	-0.715898	-0.65437	0.595561	-0.844143	-0.225163	-0.507103	0.680195	-0.680137	0.461765	-0.0205426	-0.238105	0.262775	0.743121	0.576783	-0.93167	-1.13657	0.331795	-0.598204	0.207995	0.631373	-1.07447	1.82573	-0.76837	-0.05262	-0.865572	0.152174	0.147043	0.616067
b0054	imp exported protein required for envelope biosynthesis and integrity	-1.6914	0.575635	-0.759846	1.20269	-0.771793	1.55777	0.0914161	1.80058	-1.80934	2.50008	-1.90022	0.816117	-0.139919	1.22891	1.87809	-1.42787	2.38043	2.86247	1.10555	-1.17606	-0.706895	-1.2528	0.685292	0.686997	0.512782	0.60229	0.649566	0.0938362	0.543491	0.811038	-0.611456	-1.45006	-1.88157	-0.776076	2.76945	1.15524	-0.468479	1.79019	0.220325	1.24026	-0.411234	-2.00473	-0.235343	0.50122
b0055	djlA chaperone with DnaK	1.10798	0.575016	-1.50368	-0.22196	0.387686	-1.69274	-2.18749	-1.52022	-2.59271	-0.328135	0.394638	1.60935	-0.285825	-0.255906	-0.157927	0.0865241	-2.70957	-2.31635	-1.66803	-3.37835	-1.11964	-0.855547	0.270591	0.559737	1.2496	0.241773	0.635748	0.484076	-1.91726	-0.0591745	-4.72119	-4.22146	1.63819	0.837058	2.11453	0.00937969	-2.51979	0.540289	1.30199	0.651266	-0.294275	-0.308749	-1.57411	-0.933516
b0056	yabP predicted protein	3.03317	0.443042	1.11213	-1.51841	-0.860611	-0.175967	1.0098	-0.259491	-0.215471	-3.22159	-0.100948	-1.06802	-0.0177376	0.224895	-0.0167402	1.63631	-0.641159	-0.518793	-1.349	0.791412	1.59831	-0.689694	0.0499804	-0.606892	-1.30853	0.363925	0.792072	0.231658	0.371842	0.302489	-1.98686	-0.993646	0.551845	-1.9804	-0.672347	-0.132915	0.693366	-0.92865	0.680986	-0.71374	-0.493999	0.788863	-0.19967	2.10831
b0057	yabQ predicted protein	-0.317209	0.420752	0.72017	0.220521	1.09338	0.930448	0.865176	LQ	2.80051	1.63152	5.24336	2.27453	5.57635	0.382192	0.775728	1.69942	0.172274	-0.162307	1.8708	-0.583897	1.49473	-0.724389	1.64084	0.00284782	1.47553	0.266783	0.900405	LQ	2.53451	1.96796	-1.51877	-0.760177	LQ	0.194061	0.634035	-0.302828	-0.911778	2.81855	-1.14104	1.42376	-1.33857	1.69619	-0.611027	2.46623
b0058	rluA 23S rRNA and tRNA pseudouridine synthase	0.714445	0.688359	-1.30738	0.308229	-0.176836	0.194156	0.181615	-1.36587	1.03398	1.10126	-0.446186	-2.27707	0.428899	0.527137	0.48101	0.468564	-0.704769	-0.344964	-0.967714	-2.0594	-0.931678	-0.160378	0.146491	0.908892	0.481448	-1.06326	-0.71764	-1.28454	-1.03993	-1.21584	-3.17649	-2.30209	-1.43496	-1.28797	0.472624	-0.289698	-1.33114	0.754679	-1.37617	-0.139782	-2.38445	0.464666	-1.42569	-0.7116
b0059	hepA RNA Polymerase (RNAP)-binding ATPase and RNAP recycling factor	-0.0369768	0.664628	0.297592	-0.658593	0.34941	-0.19137	0.295501	-0.342773	0.434957	1.15784	-1.15098	-1.51391	1.31808	1.39473	1.47847	2.88886	2.12662	2.09836	1.28222	-1.13316	0.485732	-0.149264	0.97543	0.173885	1.51977	0.963834	1.0406	-2.47706	-1.5195	-0.0618649	-2.05945	-1.81368	-0.706858	-0.145116	0.658285	0.425181	1.41104	1.10797	0.448116	1.55041	-0.972402	1.27745	-3.46628	1.10818
b0060	polB DNA polymerase II	-0.192981	0.641167	0.488719	0.653759	0.674227	0.201373	0.770493	-0.624108	0.142034	0.956825	0.4461	0.881842	0.323451	0.381647	0.612277	0.382909	-1.26387	-1.14578	1.25636	-0.624099	1.0472	-1.33303	0.835867	0.310668	0.303519	-0.16069	-0.172342	-0.385069	-0.730552	0.833708	-2.84687	-3.24564	-0.754516	-0.0268622	1.19995	-1.04685	1.02209	0.416542	-1.59395	1.13272	-2.74087	1.16007	-0.486883	0.758538
b0061	araD L-ribulose-phosphate 4-epimerase monomer	-0.484455	0.966603	0.771077	-0.384827	-0.14158	0.57087	-1.39331	LQ	0.650928	1.90094	0.47905	-1.34537	0.451972	0.213697	0.183372	0.386279	0.489541	0.35772	2.18767	-2.08898	1.02165	-0.225094	0.853857	-1.30262	-1.01517	-0.259989	-0.108334	-0.197796	-1.42954	0.18587	-1.56184	-1.80294	-0.545633	-0.685356	-0.808107	0.767103	-2.45102	0.456977	1.96609	0.811662	-1.92457	0.905358	-1.8152	0.203115
b0063	araB L-ribulokinase monomer	-0.294378	0.905918	1.74569	-0.813658	0.558133	0.440072	-1.63457	-0.982953	-0.149891	2.48401	0.778035	1.24737	0.889647	1.04959	0.965969	0.00665229	-1.44578	-1.26159	1.26143	-2.49622	0.0841203	-1.26249	0.703993	-0.599809	0.643652	-0.921476	-0.689837	-0.866817	-0.0880035	0.503035	1.2575	1.57752	-0.211272	1.28719	-0.163255	0.00708381	-1.58829	0.533828	-0.0937725	0.300028	0.441362	1.47813	-1.49273	0.81674
b0064	araC AraC-Arabinose transcriptional activator	-0.660483	1.09589	-0.114554	LQ	0.185762	1.21614	-0.0180639	-0.700688	0.481508	1.56117	0.581904	0.820495	0.733431	1.59703	1.71237	0.597544	-0.843432	LQ	-0.236136	-1.17934	-1.79364	0.0360788	0.630975	1.72715	0.26139	0.289299	0.937752	0.0158253	-0.367184	0.811447	-1.07055	-0.596768	-0.186984	-0.432326	0.115136	0.799207	-1.86094	-0.233326	0.586582	0.909322	-2.31972	1.36222	-0.723606	2.17049
b0065	yabI conserved inner membrane protein	-1.18138	1.61138	0.884431	-0.264679	0.43898	0.534917	-0.924885	-0.775451	0.158244	1.49999	0.930718	0.432741	1.51556	1.56736	1.46839	1.32854	-0.365931	-0.335514	0.899215	-0.129047	-0.0738245	0.188885	0.837352	-0.513332	1.43735	1.12426	0.980514	0.681812	-0.407619	0.560392	-0.470189	-0.397742	0.0527383	-0.58551	-0.250066	0.95318	0.394033	-0.111965	-0.666388	0.487412	-0.5793	0.308562	-0.387313	1.27649
b0066	thiQ SfuC	-0.544306	0.869253	0.082736	-0.545286	0.856333	1.68147	-0.147603	0.413797	1.50476	2.19357	0.807561	-0.298709	0.761195	1.33915	1.83255	0.0424283	0.498364	0.544163	1.04225	-0.969476	-1.43197	-0.191612	1.25759	-1.21414	1.23227	0.448784	0.749806	-0.0392805	-0.109379	-0.295099	-0.814618	-0.99441	-0.0331441	-0.0612686	-1.39182	0.568616	-2.6188	1.16421	2.05543	0.931651	-2.40337	0.706106	-1.70133	0.423053
b0067	thiP SfuB	-0.211433	0.546336	1.07422	-0.987418	-0.0395186	1.66337	-0.539217	-1.62517	-1.20802	1.76828	0.230196	0.693784	0.996328	0.926811	1.03679	-0.547629	-1.23798	-1.33465	0.659955	-3.26901	-1.74789	-1.89642	1.35436	-1.21702	0.563612	-0.786069	-0.678576	-0.0470438	0.60424	0.0667327	-0.142107	0.422117	-0.592915	-1.56388	-1.35966	-0.0744579	-1.89852	2.02149	-2.78626	1.48197	-3.6343	1.24998	-2.57213	-0.540186
b0068	tbpA SfuA	-0.557783	0.708758	1.16006	1.01106	1.26522	2.04492	-1.83273	0.00144213	1.1345	1.79266	0.466227	1.22148	1.30155	0.241719	0.177653	1.23516	1.1983	1.24886	-1.10979	0.928203	3.28897	-2.6981	1.71729	-0.243352	1.40071	1.04534	0.851689	1.18178	-1.10455	1.4794	-1.76023	-1.65142	-0.245327	1.78435	0.505058	0.990277	1.14908	1.77584	-0.864528	1.26585	0.90398	1.21802	-0.564273	0.661021
b0069	sgrR SgrR transcriptional dual regulator	0.234308	0.710717	0.717544	-0.739959	0.144731	0.250009	-1.1433	-0.173933	0.935588	0.38981	0.823668	-1.95703	-0.0356076	-0.908464	-0.917841	-0.52593	0.22513	0.152245	-1.84948	0.204969	1.11143	-0.931623	0.698098	-0.0411401	2.12934	2.25711	2.23712	-0.302524	0.881285	0.309455	-1.81114	-1.9699	-0.940626	0.509279	-0.524718	-0.162895	-3.6096	0.297032	-0.158321	-0.0267164	-0.667127	0.559515	-2.2927	0.392166
b0070	setA YabM MFS transporter	1.25519	0.567437	-1.61477	1.19275	0.33027	-0.117977	-5.23573	-0.0274717	-0.438491	-0.748784	0.334237	0.534829	-0.40052	-1.34553	-0.969027	-0.135176	0.0269175	-0.0691387	0.575665	-0.314761	-3.77516	-1.3247	0.14924	1.49661	0.239873	-0.272877	-0.432569	-0.521496	-0.35575	-1.17675	-0.916682	-1.44278	-0.949703	0.532944	0.46015	0.260723	-2.22292	-3.06332	1.37773	0.226001	1.41239	-1.32184	-1.56718	1.10132
b0071	leuD isopropylmalate isomerase	-0.0381232	0.949113	0.746997	-0.295855	0.350972	0.535997	-1.93757	-0.881618	0.921064	0.789977	0.869351	1.55687	0.351145	0.703984	0.682023	0.321807	-1.93533	-1.63272	-0.553883	-0.342392	-0.348046	-0.739567	0.775568	-0.473832	-0.48311	0.711289	-0.106435	0.0883354	0.423265	0.989298	-1.00453	-0.785297	0.0466119	-0.0515193	0.933872	0.112767	-0.539909	0.38548	0.152283	0.689615	-0.10962	1.27003	-0.75364	-0.293686
b0072	leuC isopropylmalate isomerase	-0.439247	0.902454	0.745964	0.667607	0.443416	0.605734	-0.986179	-0.551653	1.10804	1.70324	0.484175	-0.115212	0.571857	0.200676	0.329804	0.232053	-0.756282	-0.442815	-0.780012	-1.50823	-1.33932	-0.989873	1.08573	1.22286	-0.43153	-0.381437	-0.35207	-0.136931	-0.555665	1.55208	-0.923883	-0.722664	-1.39022	1.0044	0.44664	1.26408	-0.717359	LQ	0.137332	0.289366	-1.85149	0.371511	-1.33089	0.156574
b0073	leuB 3-isopropylmalate dehydrogenase	-0.379304	0.631549	1.58893	2.079	0.0405101	0.620096	-2.35611	-0.724513	0.829466	1.22524	0.12073	0.793725	1.30574	0.797283	0.820921	0.63944	-2.41138	-1.85831	-0.382872	-0.00703978	-0.869919	2.03399	0.730303	0.33986	1.47676	-1.37847	-0.938127	-0.0763656	-0.62926	-0.271756	-0.531246	-0.295257	-1.04383	-0.269483	0.484575	-0.506882	-0.0480072	0.698588	1.37115	1.22114	-2.00686	2.46796	-1.04985	0.25019
b0075	leuL leu operon leader peptide	3.02285	0.799319	-3.61274	-1.03891	-3.81896	LQ	-3.92108	-0.841292	-3.69993	-2.01362	-2.48618	-1.94845	-3.19878	LQ	LQ	-3.80792	LQ	LQ	-1.96777	0.380786	-3.41815	0.904069	-0.944912	0.893341	0.337781	-1.17888	-1.02769	-4.04905	0.20414	-1.91126	-0.580227	-0.890874	-3.7608	0.128177	-3.84075	LQ	-2.54992	-1.03233	0.214504	LQ	-0.256151	-3.4297	LQ	-3.21346
b0076	leuO LeuO transcriptional activator	2.83459	0.592667	-1.41797	-1.13118	-1.11719	-3.36866	-2.26036	-0.911035	-3.02821	-3.43028	-0.661838	-0.912078	-1.47689	-1.47138	-1.72076	-1.4061	-1.54639	-1.43901	-1.23706	-1.04298	-2.69935	-0.0235668	-2.617	-0.257588	-1.38216	-0.0490385	-0.156742	-0.676477	-2.04709	-1.98728	0.83089	1.19857	1.17349	0.00915533	0.544158	-0.504349	-1.27225	-2.11097	-0.172864	-1.26178	-1.328	-3.4331	1.49544	-2.61903
b0077	ilvI acetolactate synthase / acetohydroxybutanoate synthase	0.183548	0.599706	1.33599	1.55838	0.558395	0.836409	0.421821	0.940343	0.58923	0.854734	0.745517	-0.678404	1.25315	0.732862	0.924503	0.819587	-0.874431	-0.115266	1.063	-0.899536	-0.47075	1.34647	1.44469	0.872205	0.240944	0.233723	0.708576	1.69693	1.08995	0.28556	0.562778	1.53315	0.141646	-0.421225	1.5895	1.28236	-1.84533	-0.104172	0.496258	0.502049	1.02928	2.08043	0.256185	0.272612
b0078	ilvH acetolactate synthase / acetohydroxybutanoate synthase	0.820928	0.398581	-1.63333	LQ	0.0983237	LQ	-1.32868	LQ	-0.0392559	0.559244	1.48404	-1.11921	-0.196397	0.572142	0.39672	0.0192555	0.390206	0.192738	0.138245	0.461648	3.89095	0.752693	-0.105762	-2.86142	1.61307	0.320261	-0.0429808	0.245913	1.24289	-2.62093	2.42755	2.64677	2.41807	1.3754	2.17796	-1.56527	-2.87187	-2.01932	-1.25394	-0.422454	0.967652	-1.61304	-0.0226087	-3.38882
b0080	fruR FruR transcriptional dual regulator	0.560555	0.577813	-2.16683	-3.17696	-0.749313	-2.31571	-1.73792	-2.09757	-1.79927	-2.65579	0.55166	1.65189	-0.43262	0.514035	0.105495	0.834232	-0.370223	-0.246386	2.20674	0.822106	1.17419	0.92025	0.400004	-1.18165	-0.968248	-0.241342	-0.312446	0.936036	2.02404	1.67562	1.36554	1.26239	0.379304	0.0508117	1.22924	-0.0739633	-2.34861	-0.973254	-0.7544	0.391947	1.03533	-0.979705	-1.05701	1.02936
b0081	mraZ conserved protein	-1.07417	0.784213	-0.49599	-0.152285	-0.21808	-0.338804	0.0775415	-0.427624	0.384892	-0.290154	0.319202	-0.0842173	-0.368179	-0.385925	-0.17638	-0.370783	-0.283536	0.109137	-0.671437	-0.343839	1.07012	-1.25861	-0.567806	-0.45174	-0.212625	0.0718793	0.399332	-0.505595	0.338933	-0.179045	-0.202174	0.426567	0.230179	-0.802435	-1.03654	-0.33302	-0.761768	-0.0962204	1.42142	-0.763775	-0.714948	0.0304031	0.0793695	0.0649215
b0082	mraW S-adenosyl-dependent methyltransferase	-1.76365	0.688434	-0.17324	0.170358	-1.3137	0.617023	-0.603119	-0.5873	-1.042	0.114043	0.00730663	3.3816	-0.983274	0.375416	-0.0346949	-1.11557	0.820157	0.664411	1.08266	-1.05249	-1.38606	-0.870721	1.22122	-1.23013	1.05774	0.0759893	-0.249016	-1.18744	1.12299	1.298	-0.50998	-0.716716	-0.401194	-0.312408	-2.20146	-0.810759	-1.04926	1.42978	-0.970053	1.09741	-0.717543	-0.885634	0.252973	-0.58733
b0083	ftsL essential cell division protein FtsL	-1.25351	0.464155	-1.79349	0.372551	-2.05614	0.180679	-1.47389	-0.643179	-2.3875	1.65492	0.0756457	1.37126	-1.38202	0.0548392	1.03853	-1.35261	-0.326108	0.583966	0.989936	-1.02983	-1.47373	0.828157	0.242964	-0.407855	0.575325	-0.927462	0.214302	-1.66036	1.09877	1.08531	-1.67038	-0.425436	-1.80868	0.26534	-2.57562	-0.535202	-0.914822	1.44966	-0.76536	0.235435	-0.517053	-1.52274	-0.244813	-1.33513
b0084	ftsI essential cell division protein FtsI; penicillin-binding protein 3	-3.24244	0.822277	-1.11643	0.33955	-0.337001	0.634531	-0.825318	1.08127	-0.605766	0.864242	0.826656	0.706199	-0.560109	0.38803	0.800226	-0.644107	0.0162918	0.410826	0.671794	-0.705886	3.78615	-0.380553	0.784827	-0.885101	0.418768	1.343	1.1883	1.53108	1.48951	0.769411	-0.906099	-0.665496	-0.966881	-0.379235	-1.3128	-0.617406	-0.837849	1.30167	-0.764115	0.396251	-0.48308	1.2684	-0.0214935	2.10959
b0085	murE UDP-N-acetylmuramoylalanyl-D-glutamate 2,6-diaminopimelate ligase	-3.35745	0.485488	-0.167332	0.859123	-0.0858877	0.740843	1.18567	2.76067	-0.875377	1.31254	1.72609	1.5818	0.894022	1.44972	1.83323	0.24881	0.556056	1.14777	1.28452	-0.72163	0.305324	-1.15273	2.77213	-1.35985	1.99003	1.16852	0.371181	0.475368	1.42863	2.0757	-0.240012	-1.31362	-1.98661	0.0816646	-1.98661	-0.145756	-1.32563	2.24103	-1.22386	2.63069	-0.430536	0.373673	4.3789	0.27096
b0086	murF D-alanyl-D-alanine-adding enzyme	-2.94887	0.757054	-0.81673	-0.0362089	-0.940496	0.17018	-0.250771	-0.343363	-1.05832	1.33957	-0.0847064	0.921782	0.231932	0.878421	0.563233	-0.828416	2.42978	2.08014	0.590192	-1.11614	-0.831395	-1.18855	1.32062	-1.29421	1.19657	0.339038	-0.835098	1.43448	0.664299	1.26886	-0.0517844	-1.19121	-0.641504	-0.251237	-1.81369	-0.868219	-1.4138	1.11173	-1.1304	1.37762	-0.580172	-0.971989	0.349673	-0.583158
b0088	murD UDP-N-acetylmuramoyl-L-alanine:D-glutamate ligase	-3.0143	0.490417	-1.335	-0.0117883	1.1209	0.056986	-0.421906	-0.918523	-1.73225	0.614711	0.212761	1.90421	-0.0507744	1.60848	0.630131	-0.237027	1.45055	0.740141	1.62247	-1.55002	-1.2532	6.30584	2.52439	-1.35812	2.37101	0.759312	-0.503744	-2.26	1.79439	2.3838	-0.111899	-1.77186	-2.2703	-0.0200796	-2.66636	-0.965344	-1.75392	2.48776	-1.83458	2.44262	-0.876578	-0.638712	1.06852	-0.72517
b0089	ftsW essential cell division protein FtsW	-3.07251	0.473929	-2.15496	0.958898	-0.379572	0.657767	-0.885267	-0.41534	-1.18071	1.29121	-0.533144	1.55172	-0.972101	2.00451	1.19274	-1.51219	0.986785	0.670915	1.50256	-0.735568	-2.29763	-0.0651947	1.60143	-0.400793	1.49355	0.747238	0.188957	-1.87604	1.42139	1.72978	-1.01558	-1.30291	-1.30855	0.159869	-0.701647	-0.895758	-1.36169	2.21974	-1.01387	0.952016	0.0365943	-1.81139	-0.735269	-0.540837
b0090	murG N-acetylglucosaminyl transferase	-3.03764	0.490835	0.000782096	4.36999	-0.451202	1.29984	0.855057	0.531121	-0.343272	0.665111	0.402134	1.89005	0.617619	1.28485	0.754401	-0.174872	2.77333	2.76697	1.28741	-1.36127	-0.277545	-1.09276	2.621	3.17337	1.85991	1.08193	-0.545988	0.58385	1.59889	2.04029	-0.166272	-2.2459	-1.03899	-0.0738243	-1.96142	-0.92173	-1.58941	2.43732	-1.69565	2.67629	-0.453693	0.377105	0.297883	-0.171213
b0091	murC UDP-N-acetylmuramate-alanine ligase	-3.82764	0.960189	4.30007	2.51288	4.14761	1.52697	4.43298	1.08266	4.02297	0.951761	4.56791	-0.497601	4.44404	1.96881	0.800986	4.46932	-0.504867	1.49456	0.50562	-0.514782	4.23547	-0.514782	0.329427	-0.514782	-0.24777	-0.310064	0.524518	4.3333	2.26825	0.00167888	0.752578	0.43777	4.34482	-0.153105	4.10648	0.660452	-0.514782	1.55567	1.24028	0.208283	0.385643	4.35818	-0.514782	4.39031
b0092	ddlB D-alanine-D-alanine ligase B	-2.75736	0.559903	-1.00998	2.11224	-0.912254	0.185408	-0.727503	0.597389	-0.428342	1.95334	0.83394	1.2462	0.884844	0.912233	0.343027	-0.85886	0.78569	-0.702776	1.15975	-0.901628	-1.09465	-0.825323	1.25969	-1.05864	0.722149	0.379085	-0.420429	1.13999	1.66917	1.35937	0.034468	-1.85962	-0.539221	2.45427	0.41175	0.285283	-1.54168	1.42104	-0.600557	1.17838	-0.886849	-1.08967	LQ	0.0229095
b0093	ftsQ essential cell division protein FtsQ	-2.5732	0.469254	-1.90773	0.269404	0.109453	0.693783	-0.850752	-0.174064	-1.88095	1.09578	2.54589	1.65061	0.757858	0.883018	0.47459	-0.801023	0.328823	-0.219068	1.52348	-1.02526	-2.22184	0.200649	1.6063	-0.745747	1.35166	0.0243711	-0.365497	0.297255	1.59724	1.91583	-0.927378	-1.68451	-1.58452	0.137383	-0.128542	0.343031	-0.895657	2.23485	-0.739154	1.51888	0.000587743	-1.51463	0.025657	0.127629
b0094	ftsA essential cell division protein FtsA	-2.76209	0.415467	-1.77334	0.929218	-0.756647	1.19103	-0.975939	0.152155	-1.49322	1.06899	0.399737	1.80558	0.399398	2.00878	0.873528	-0.72361	0.917995	0.490856	1.89975	-0.483285	-2.04699	1.83452	1.37852	-0.322447	1.64284	1.85611	1.52217	0.868778	1.55936	2.01723	-0.853513	-1.05548	1.8353	0.423878	-2.38511	0.0731645	-0.775836	2.38507	2.17518	1.19268	0.00684493	0.853485	-0.184261	1.55869
b0095	ftsZ essential cell division protein FtsZ	-2.9121	0.394706	-0.928778	1.2982	-1.65365	1.95139	-1.5057	0.607845	-1.31056	1.57801	0.597599	1.95461	-1.2928	1.65485	1.22235	-1.83572	0.681902	0.56107	2.10125	-0.71689	-2.74644	0.0241035	1.98949	0.0311247	1.65824	-0.0729942	0.0503682	0.17568	1.66079	2.68463	-1.14057	-1.47092	-2.63517	0.0810445	-0.341632	-0.371717	-1.17414	3.34809	-0.993246	1.04321	-0.248929	-1.71815	0.41174	0.0926622
b0096	lpxC UDP-3-O-acyl-N-acetylglucosamine deacetylase	-2.8506	0.468881	0.833265	4.0251	0.211709	1.97047	-0.571757	0.84396	1.15431	3.10446	1.29768	2.73633	0.0877229	1.01081	0.140988	-0.0624808	0.104468	0.220846	1.1731	-0.760046	-1.29365	0.684961	2.78417	0.583401	1.41525	-0.24303	-0.727757	0.852274	1.66124	3.5614	-0.787322	-1.68842	-0.680294	-0.217082	-1.21781	1.26022	-1.49452	1.91618	-0.7552	2.09987	-0.508094	-0.574749	LQ	2.48451
b0097	secM secretion monitor that regulates SecA translation (General Secretory Pathway)	-2.39403	0.997344	-0.051083	-0.0866111	0.438387	0.375155	0.019885	-0.446211	0.65915	-0.0756825	0.278388	3.40118	-0.14072	-0.36281	-0.163489	0.488269	-1.02173	-0.307698	-0.386802	-1.30628	-0.653068	-0.383581	-0.00850427	-0.957632	0.00220118	-0.465234	-0.58387	0.145292	-0.0900859	0.353879	-1.19805	-1.49188	1.50785	-1.01421	-0.330314	-0.373507	-1.51082	0.231639	-1.12181	-0.0388477	-1.12805	-0.440319	-0.595028	1.42047
b0098	secA Sec Protein Secretion Complex	-1.78277	0.442685	-1.1487	1.77935	-0.334836	0.220195	0.265888	0.679926	0.318468	1.27496	-1.27754	1.37355	-0.801157	0.831236	0.803823	-0.280246	2.11662	1.4859	0.928078	-0.916796	-2.33682	-0.367075	1.17588	0.253246	1.00976	-0.703132	-0.108602	0.38726	1.36163	1.39725	-1.51618	-1.13506	-1.02651	1.28144	-1.47439	0.190068	-0.722543	2.54427	0.0221933	0.764083	-0.484357	-0.330299	-0.460899	-0.241567
b0099	mutT dGTP pyrophosphohydrolase	-0.154028	0.390945	3.21106	3.42786	2.68903	1.96032	5.49493	4.55982	-0.189504	3.02747	-0.0382871	-1.62061	0.688907	2.75197	3.14392	1.70106	2.39375	2.27609	0.359241	-4.18051	-2.76314	-3.64822	1.16522	0.897429	1.12839	-0.344103	-0.58504	1.179	2.64599	-0.818274	0.157295	0.115573	-1.75303	1.73401	0.130394	-0.195894	-4.46293	2.67196	4.30939	-1.58184	3.55818	3.83236	-2.66386	4.60655
b0101	yacG conserved hypothetical protein with a zinc finger	-0.06406	0.798177	-0.570984	LQ	0.384316	0.284297	0.435731	0.193976	-0.485472	0.517338	-0.512595	0.13324	0.382681	0.151488	-0.0136812	0.707384	2.20918	2.09948	2.78496	-1.04162	-1.66359	0.313175	0.379738	1.21955	0.272104	-0.179586	LQ	1.32489	-0.0241648	0.364197	-1.20029	LQ	-0.762682	-0.76375	1.18982	-0.772335	-1.0945	0.648149	1.93204	0.136526	-0.963821	-0.486344	-0.200043	-0.091007
b0102	yacF conserved protein	-0.103754	0.912338	-0.886031	-1.22289	-0.141791	-0.89751	-0.316401	-0.225861	-0.42261	-0.171379	-0.897411	-1.68991	-0.747736	-1.32273	-1.22417	-0.757201	-1.49708	-1.33287	1.76997	-0.204816	-2.90832	-0.74812	0.0940225	-1.47991	0.957214	0.432631	0.0401258	0.755853	-0.190627	0.811139	-3.40855	-2.89789	-0.830535	-0.95827	0.41483	-0.406366	-2.74109	0.388367	1.21998	-0.832706	2.32768	0.484265	-1.36167	0.55323
b0103	coaE dephospho-CoA kinase	-1.2298	0.534196	-0.551976	-0.460988	0.307728	1.26721	-1.00969	0.951694	1.7387	1.10215	1.05319	0.744056	0.0106458	1.78166	1.77316	0.458808	-1.77731	-1.248	-0.157118	-1.6782	-1.69103	-1.5585	0.669085	-0.610153	-0.129559	-0.708146	-0.0466962	0.404288	0.712267	0.527983	-2.46586	-1.48903	-1.05797	0.916872	0.38714	-0.451094	-1.35369	0.950695	-0.544348	0.392984	1.50363	-0.0155038	-1.52312	0.252782
b0104	guaC GMP reductase	-0.13084	1.02362	0.974448	-1.45782	0.697747	1.1603	0.0965716	0.210908	1.5345	1.54309	0.752647	1.20198	1.19974	0.841047	0.969808	1.53853	-0.909373	-0.558827	-1.30356	1.33225	2.39396	-1.02364	1.24799	0.0994343	1.36436	0.625863	0.810919	0.126744	1.00093	0.744195	-0.645829	-0.25345	-0.0454494	0.940303	-0.958989	0.98132	0.512969	0.805005	0.885805	0.423403	-0.258971	0.556308	-2.18048	-0.782086
b0105	b0105	0.600962	1.14571	-0.509083	LQ	-0.582096	LQ	-0.210702	-0.63603	-0.225856	-0.320813	-0.285417	1.24476	-0.513443	0.642947	-0.288572	-0.265477	LQ	-0.433964	-0.0245337	-1.24285	-0.670142	-0.821105	0.1323	-1.10169	1.43805	0.193482	0.115934	-0.783521	-0.512821	-0.529307	LQ	-0.891614	-0.854603	0.727885	-0.916355	1.25467	-1.71096	1.82701	1.01596	LQ	-0.716307	-0.162388	-1.29108	-0.584078
b0106	hofC protein transport protein HofC	0.301795	0.575684	1.29386	-0.82176	1.03892	1.70356	-0.0562231	-0.889795	-0.522249	1.95964	0.859146	0.581198	1.21682	1.23961	1.08168	0.659397	1.68379	1.90598	0.991473	-3.54704	0.0135747	-0.737373	1.46617	-1.03249	1.2313	0.629307	0.392153	0.616693	-0.301999	-0.924691	-3.47899	-4.16752	-0.136035	0.482794	0.131867	-0.131649	-0.0266192	0.462112	0.526436	1.54808	3.19408	1.83242	-1.90842	0.551202
b0107	hofB protein involved in plasmid replication	0.203944	1.21406	0.553133	0.895195	0.648043	0.692681	0.957056	-0.483129	-0.0672423	1.09558	0.813533	-0.576837	0.536602	0.490523	0.435955	0.972501	-0.290979	-0.193098	0.487915	-0.117915	0.254623	0.198919	0.70679	0.321475	0.798365	0.421582	0.384148	0.715207	0.0341104	-0.146113	-0.136846	-0.0552706	0.120401	0.043241	0.163583	0.753463	-0.414533	0.486748	0.348502	0.726078	-0.940424	0.979801	-0.0763302	1.72436
b0108	ppdD prepilin peptidase dependent protein	0.246938	0.634914	-0.260154	-1.111	1.9475	1.20902	0.708862	-1.04173	-0.180895	2.43721	1.42489	-0.707914	1.11787	-0.0560012	-0.0359192	0.0814249	0.770833	0.845601	1.29766	-0.816329	-0.0256613	-0.834533	0.726511	-2.0675	1.08837	-0.0552086	-0.0725682	0.576279	-2.25912	-0.721037	-4.82439	-4.07274	1.45322	1.97227	-0.752711	1.01883	-2.42417	1.07548	-0.957808	1.20425	2.28981	-0.858534	-0.349584	-0.38849
b0109	nadC quinolinate phosphoribosyltransferase (decarboxylating) monomer	-1.12364	0.754686	2.27212	0.228256	4.41053	3.71791	1.0855	2.48436	4.39705	4.96868	0.641494	0.500999	-0.557221	-0.275837	-0.349027	0.532725	3.19267	3.33003	1.48124	1.26135	0.349313	0.154156	0.702421	1.43185	0.0349168	0.238566	0.43947	0.066036	0.0602736	1.35665	-2.57872	-2.39735	0.798834	1.0303	2.45554	1.16298	-0.654082	0.955411	-1.25613	-0.00626795	0.475831	0.243797	0.0241095	5.02147
b0110	ampD N-acetyl-anhydromuramyl-L-alanine-amidase	-0.427801	1.25383	0.610626	0.0733213	1.92293	1.68739	0.0774763	-0.301445	1.84594	2.15295	-0.667196	-0.949627	-0.432307	-1.11785	-0.996188	-0.326575	0.198002	0.511356	0.715211	1.42056	-0.333712	0.601047	0.718906	0.463191	-0.41673	-0.361646	-0.262792	0.147699	-0.287282	0.310601	-2.04661	-1.71844	0.631063	-1.03562	-0.485288	0.179553	-1.81184	-0.282992	-1.09799	1.46634	2.02491	-0.642174	-1.51793	0.947169
b0111	ampE predicted inner membrane protein	0.319994	0.455946	1.85539	0.385261	1.51876	2.2621	0.685003	-2.30778	1.5902	3.2174	-0.434664	-1.71653	0.425316	-0.8104	-0.259558	-0.0614244	2.62773	2.64924	-1.67638	3.01517	-2.6041	-3.6352	0.889411	1.80587	0.97385	-0.723077	-0.795441	0.391482	-1.51018	1.02938	-4.50924	-3.66201	-1.18176	-1.83466	-0.0767592	0.878947	-3.1365	-0.128738	-5.10531	1.25698	1.71942	0.987065	-3.32735	-0.316644
b0112	aroP AroP phenylalanine/tyrosine/tryptophan APC transporter	0.928337	0.659748	-0.397112	-0.235591	-0.447547	-0.530609	-1.57089	0.00676495	-0.0926533	0.290868	-0.865905	0.890844	-0.559781	-1.07337	-1.07664	-0.676949	1.40577	1.23335	-1.53366	-4.0016	-3.16336	-3.08546	-0.375246	-2.11976	-0.367033	-0.812617	-0.995746	-1.0182	0.420074	-2.05849	2.08064	2.06988	-0.129085	-0.572214	-0.271206	0.0838776	-2.61349	-1.25894	-1.0508	0.642311	-1.74745	-0.975413	-1.23197	-0.846062
b0113	pdhR PdhR transcriptional dual regulator	-2.14911	0.742312	6.41248	7.18053	6.23594	5.83844	7.90526	8.31556	6.3423	7.36479	1.00543	0.0797135	-0.237568	0.69277	0.374132	0.364197	3.26296	3.02208	0.045549	-1.06487	-1.19416	-0.802306	1.35612	1.26541	0.255777	-0.210698	0.189408	0.487028	0.711974	0.183367	-0.748977	0.127051	-0.29427	-0.248676	-2.18037	0.696998	-0.456077	1.029	3.45731	0.165987	1.04805	1.43352	-0.334219	3.3296
b0114	aceE subunit of E1p component of pyruvate dehydrogenase complex	-2.61924	0.580096	14.6254	14.4363	8.73485	10.382	17.0914	15.332	10.3276	11.0779	-0.117783	1.11113	-0.0236371	LQ	-0.0775155	-0.00172337	0.804473	0.472804	2.68354	-0.910234	-2.15394	-0.835111	2.68304	1.49573	0.722502	0.290863	-0.214874	1.12594	1.04283	1.14391	0.851893	1.06626	-1.38527	-0.398621	-1.22962	0.801145	4.10438	3.24938	-1.07534	0.91512	-0.742522	2.35785	1.35045	5.71459
b0115	aceF AceF-lipoate	-4.10777	0.461376	19.9506	20.1113	12.2192	14.112	22.267	21.1675	14.2649	15.3797	3.08906	-0.464172	2.55293	3.50101	-0.266038	2.95843	-0.464172	-0.464172	6.07214	6.49333	3.7691	4.31636	3.96637	-0.15684	-0.464172	5.14869	4.36103	3.31592	-0.464172	0.630768	-0.464172	-0.464172	3.09681	-0.464172	0.238744	-0.464172	4.0195	1.76846	-0.464172	-0.464172	0.827276	6.08502	-0.464172	5.79576
b0117	yacH putative membrane protein	0.273652	1.15481	0.0422492	-0.467108	0.55674	0.534213	1.04916	-0.331829	0.364591	1.03901	0.149773	0.0753764	-0.145614	0.172753	0.212357	0.363677	-0.341845	-0.247603	1.14395	-0.102476	0.883523	0.115188	0.291386	0.369555	1.42433	0.611621	0.53533	0.0806629	0.490871	0.0230195	-0.705447	-0.575486	0.853085	-0.0434803	-0.0949218	0.28393	0.73326	0.557301	0.548235	0.316595	-0.979101	0.165095	-0.868387	-0.62897
b0118	acnB aconitase B	-2.43679	0.571032	4.71593	4.03812	5.03613	4.61098	4.74499	4.23409	3.74243	5.30088	1.37643	0.298873	0.853965	1.98615	1.80027	-1.09634	2.05328	1.67965	3.86235	0.666414	3.11975	1.522	1.4548	1.13605	0.372526	-0.322069	0.0534139	1.31379	1.56438	1.90746	-1.8352	-1.4387	-0.851145	-0.234047	0.206422	0.565188	-1.32921	3.24079	-1.28961	0.506459	4.26076	1.40318	-0.137667	2.72559
b0119	yacL conserved protein	0.183777	1.22712	-0.119014	1.35364	0.467081	0.353612	-1.08886	1.00927	-0.056596	0.559184	0.411032	-1.06879	0.880899	0.0616793	-0.0534626	-0.285238	0.819178	0.244472	-1.23383	1.96854	-0.650387	0.687597	0.665308	0.792269	1.08123	0.254107	0.175268	-0.0258454	0.103676	0.622176	-2.04	-1.89891	0.114757	0.944049	0.221886	0.183562	-0.0458559	0.495639	1.90727	0.780945	1.77527	-1.0958	0.292854	-0.139531
b0120	speD adenosylmethionine decarboxylase, proenzyme	-0.180947	0.891517	2.57013	0.765633	-0.413447	-0.231331	0.856789	1.73193	0.741908	0.371536	-0.847431	-0.869496	-0.29461	-0.0731072	-0.035325	-1.39728	-1.64755	-1.42751	-0.1094	-1.56094	1.30663	0.7098	0.6829	1.18889	0.821619	-0.508283	-0.508828	0.00136824	-0.568321	0.13969	1.8858	2.51215	-0.249419	-0.542148	-1.80828	0.0560471	-2.29199	1.19105	0.538161	-0.240061	-0.932612	0.246442	-1.6951	0.636291
b0121	speE spermidine synthase	-0.895679	0.557472	4.37806	3.11411	0.224904	-0.531495	5.07781	1.44489	-0.222832	0.936207	-0.197873	-0.455146	0.35739	1.28525	1.33143	-1.12179	-0.662959	-0.0563994	-0.383414	-2.46954	2.88502	-1.77682	1.5402	0.0482415	1.59001	1.24234	1.02095	0.777169	3.58751	1.72705	2.31241	2.83818	0.540532	1.25199	1.14701	1.58354	-3.05337	0.281466	1.33791	-0.595419	-2.5939	-1.76592	-1.62542	-2.00122
b0122	yacC predicted protein	0.915835	0.7052	-1.80531	-1.63878	-0.481704	-2.11454	-3.27173	-0.566092	-1.37229	-1.63695	1.18957	0.984158	0.91513	0.339944	0.479363	0.414829	1.70579	1.43259	-0.588313	-2.10226	-0.424403	-0.169196	-1.46884	-0.223985	-0.194707	-0.666462	-0.782814	-0.491326	0.134953	-1.84121	-1.15175	-1.41669	0.874006	1.22745	1.49222	-0.986675	-1.65241	0.49435	-0.216859	0.670278	-0.686197	-1.54783	0.0582816	-1.5936
b0123	cueO multicopper oxidase with role in copper homeostasis	-0.152487	0.547082	-0.38506	-0.00455222	0.298648	0.592872	-3.28892	-1.02811	-1.34745	0.760067	0.501562	-2.08479	1.14926	0.921762	0.877029	1.77935	2.53243	2.7441	0.977167	2.36386	1.46378	-0.606251	0.772486	0.52918	-0.0630392	-1.05616	-0.935951	-0.37583	-0.152095	-0.774485	-0.36132	-0.138765	0.456564	0.184423	0.00667287	-0.29812	0.861395	1.51114	-2.38358	1.23252	-1.71927	-0.486806	-2.34974	1.77774
b0124	gcd glucose dehydrogenase	0.0977567	0.938254	0.426606	0.0690161	-0.0358421	0.437961	-1.22413	0.133652	-0.637155	1.33721	-0.162507	1.25502	0.533714	0.333048	0.290356	0.346772	-0.456131	-0.451143	-0.159595	0.504918	-0.0636934	-0.382923	0.348861	0.463271	0.0915068	-0.708827	-0.27491	-0.272736	0.0614575	0.181559	0.313488	0.33477	-0.488724	0.171977	-0.0916289	-0.0244872	0.276607	0.985028	LQ	-0.0567285	-0.279392	0.903703	-0.281549	0.3617
b0127	yadG YadG/YadH ABC transporter	0.123512	0.870659	-1.00688	-0.129729	-0.0665509	-0.518453	-2.92803	-1.75211	-0.256255	0.0747462	0.579402	-1.56384	-0.0669613	-0.870897	-0.623348	0.375451	-2.70066	-2.54435	0.0589339	-1.59267	0.4996	-0.844054	0.143411	-0.486231	-0.592728	-0.122917	-0.0373175	0.43843	0.278664	1.69212	-2.77379	-3.28091	0.841136	-0.744283	-0.894516	-0.326103	-2.27719	0.775658	-0.563087	0.0614042	-3.15791	0.144766	-1.0305	-1.10761
b0128	yadH YadG/YadH ABC transporter	-0.822086	1.8723	-0.773724	0.845482	0.846969	-0.0084242	-1.01562	0.920707	-0.154519	0.0541654	0.0930572	-0.628938	-0.0100427	-0.411627	-0.338189	0.0315194	-1.16689	-0.8891	1.42639	-0.0407708	-0.299563	0.991376	0.464559	0.633825	-0.191054	0.348604	0.421468	0.69797	-0.0551095	-0.0390122	-1.21568	-1.25761	0.616127	0.85215	0.309273	-0.097842	-0.710497	-0.196163	-1.05882	-0.348631	-0.292468	-0.630237	0.814191	0.20164
b0130	yadE predicted polysaccharide deacetylase lipoprotein	0.410684	0.336601	-0.0716755	-0.703827	1.15716	-0.172065	-2.91633	-1.76688	0.787386	-1.16074	0.82391	0.830391	0.444734	-1.53816	-1.31129	-2.3664	-4.84361	-4.27338	-1.85822	-1.2309	0.252572	1.30068	-0.949358	-4.63165	-0.00771163	1.17571	0.87889	-1.66062	-1.19783	-0.185846	-6.07998	-5.26157	1.66405	0.430161	2.12234	-1.34017	0.757111	-0.0418418	-3.47111	0.793512	-5.00032	-1.53998	-1.87138	4.20607
b0132	yadD predicted transposase	1.13387	0.49861	-0.247066	-2.64123	-0.475733	-0.796407	-1.99319	0.00129742	-2.65123	0.027274	-1.00927	-1.65139	-0.327008	-2.71565	-2.70152	1.63975	0.484892	1.1864	0.749466	-6.54421	-2.08632	-0.729204	-0.510386	-1.63894	-0.462662	-0.175252	-0.544797	-1.25305	-1.69666	-0.845638	0.81283	1.5101	1.02794	0.300867	0.599464	-0.482735	-4.11086	-0.142554	-3.76542	-0.858969	2.24498	2.90736	-0.458536	0.848327
b0134	panB 3-methyl-2-oxobutanoate hydroxymethyltransferase monomer	0.419947	0.866513	1.22859	-2.30761	-0.321955	0.771153	-0.132837	-0.180477	1.2682	0.734791	-0.260677	-1.91526	-0.799165	-0.361965	-0.153265	0.242792	-2.19527	-1.22298	1.91231	1.37864	1.09122	-1.24416	0.0700998	0.530504	0.870804	0.521003	0.87	-0.328891	0.621597	-0.0866667	-0.334729	0.071513	-0.186522	-0.318944	-1.01839	0.349934	1.22565	0.157817	-1.53521	-0.552723	0.351754	-0.556431	-0.284727	1.67861
b0135	yadC predicted fimbrial-like adhesin protein	3.01391	0.48674	-1.63301	-2.5494	-0.863495	-1.20476	-2.16958	0.0705461	1.01542	-4.74023	0.119212	-1.92182	0.602531	-0.767993	-0.458279	1.07333	-0.727582	-0.577059	-0.186261	0.5935	0.887567	0.459	-0.919084	-0.154067	-0.832964	-0.0152321	0.869156	1.24101	-0.311426	-1.36309	-0.748073	-0.218679	1.40641	-1.64405	-0.0267368	-0.134317	0.55097	-1.07078	0.0757939	-1.58065	-0.313784	-0.00813038	1.13286	0.349134
b0136	yadK predicted fimbrial-like adhesin protein	2.3364	0.442287	-3.54352	LQ	-1.29454	-3.34734	-2.31709	LQ	-3.97851	-5.1312	0.60684	-2.98391	0.368132	-0.830973	-2.22846	-0.213424	0.432033	-1.05984	-2.98961	0.881184	0.480963	1.20591	-2.33463	-0.731789	-1.77642	0.624042	0.0645846	0.863951	-2.81107	-2.4168	3.19824	2.25684	2.52161	-0.453993	1.67762	-0.885639	0.0589118	-2.47963	0.255911	-1.20051	1.69229	-4.39596	1.31218	-1.64447
b0138	yadM predicted fimbrial-like adhesin protein	4.10199	0.718254	-5.10884	LQ	-5.64573	LQ	-5.22555	LQ	-5.24385	LQ	-4.93831	-3.26118	-4.83571	-0.312364	LQ	-5.33822	-1.7103	LQ	-0.157568	1.08326	-5.38336	0.442787	-1.18744	LQ	-1.60695	LQ	-0.302339	-5.6973	-1.4927	-0.484292	-1.6011	LQ	-5.87517	-0.286398	-5.98021	0.0402691	0.467332	-0.740491	-0.424686	-0.687214	-1.68586	-5.26347	-0.0801838	-5.39233
b0139	htrE putative outer membrane porin protein involved in fimbrial assembly	3.16997	0.419317	-1.75132	-0.658406	-1.09049	-1.21983	-4.44861	0.628731	-2.78319	-4.39042	-0.518343	-1.02771	-0.85198	-0.43147	-0.727397	-0.915037	1.08212	0.871226	-0.907925	0.948625	-0.758908	1.55968	-1.25708	0.624834	-0.281652	-0.426996	-0.314457	0.840165	0.318263	-3.15027	2.00814	1.61569	1.07901	-0.389365	0.339462	0.300507	0.718825	-1.95989	0.29841	-0.200124	0.452788	-1.43018	1.28674	-1.38619
b0140	ecpD probable pilin chaperone similar to PapD	3.439	0.597236	-2.80891	-0.772477	-1.83649	-2.11653	-3.3755	0.971131	-4.83236	-6.04594	-1.95161	-2.35062	-1.21572	-1.45928	-1.65646	-0.516244	-0.614063	-0.749074	-2.383	0.892659	-0.8167	1.22315	-0.973021	0.468401	-1.18491	0.108635	-0.121618	0.606849	-0.144327	-3.43552	1.15604	1.26783	0.393329	-1.31508	-0.330557	0.237717	1.32097	-1.61692	1.00087	-0.894194	1.10214	0.260017	1.10343	-0.6245
b0141	yadN predicted fimbrial-like adhesin protein	2.02272	0.513908	-1.02379	-1.69719	-0.893864	-3.31875	-0.934909	-1.39848	-2.82587	-4.46607	-0.651612	-1.57364	-1.69199	-0.286484	-1.94941	0.168455	-0.162419	-1.5595	-3.61427	0.562032	-0.343927	0.645489	-3.05886	-0.406633	-0.827837	0.437343	-0.476779	-0.426836	-0.595196	-1.86171	1.2297	0.646074	2.17237	-1.22076	0.500395	-0.455184	0.66412	-1.41017	-0.15055	-1.70225	-0.284264	-3.22373	1.97323	-0.510774
b0142	folK 6-hydroxymethyl-7,8-dihydropterin pyrophosphokinase	-0.814273	0.607542	-1.36741	1.76097	1.27046	0.902573	-1.26954	0.229232	0.389651	0.496889	0.0825039	1.48501	0.663647	0.391737	0.72687	0.0763388	-0.289132	0.0376608	-1.01651	-1.24196	-1.01303	3.07949	-0.963216	-0.145135	-0.999286	0.432943	1.10942	0.531741	1.54498	-0.657032	-1.55435	-0.84729	0.515825	0.78247	2.12037	0.707857	3.69672	0.273301	-0.452736	1.15317	-1.08198	-1.44651	1.05777	-1.27818
b0143	pcnB poly(A) polymerase I	-2.00594	0.794936	-1.15062	1.66354	0.428643	0.890209	-1.00807	1.89649	-0.106284	0.033091	1.10029	0.359208	-0.0288812	1.28865	1.34502	-0.513261	-0.958291	-0.333397	2.01619	-1.2662	3.13632	0.110603	0.441583	-0.406252	0.0151278	0.779149	0.909242	0.628408	0.359426	0.385493	1.15724	0.870364	0.431951	-0.267123	1.01821	1.23249	3.87287	1.50627	-0.816038	0.072508	-0.906465	0.565067	-0.280393	-1.3578
b0144	yadB glutamyl-Q tRNA(Asp) synthetase	-1.02645	0.468171	0.63081	0.0518358	0.295329	1.4049	-2.84933	1.18406	0.30887	0.499256	-0.560469	1.83113	-0.446111	0.90697	0.91053	-1.02907	-0.616143	-0.529095	2.02121	-1.67991	-1.51229	0.837088	1.34683	0.559996	1.4408	0.657645	0.601659	0.621135	1.86411	1.63538	0.316883	0.214208	-0.561471	1.35127	-3.12913	0.448723	2.26179	1.83741	-0.2173	1.35311	0.29668	-0.318267	0.644689	-2.19439
b0145	dksA RNA polymerase-binding transcription factor	-0.950574	0.593131	1.37888	1.09882	2.17524	2.38302	-1.17623	1.28096	1.7396	1.4953	-0.371594	0.266612	-0.648614	-0.405294	-0.440654	-0.380467	-0.920166	-1.08151	-0.0559104	-1.65588	-0.00758241	1.07642	0.504975	0.432108	-0.115473	-0.971303	-0.94815	-0.19475	0.425085	0.0312203	-1.56914	-1.8031	-0.828909	1.21547	-0.0399547	-0.0812671	0.705783	0.306322	-1.28512	1.47849	-1.38973	-0.829897	-1.20044	-0.902355
b0146	sfsA predicted DNA-binding transcriptional regulator of maltose metabolism	1.11402	1.02409	-1.24963	-0.39679	0.45727	LQ	-1.26374	LQ	0.0959077	0.255034	-0.127577	-0.759978	-0.029241	-1.07823	-1.30377	-1.47226	-1.47246	-1.39524	0.68235	-3.40522	0.929633	-0.606709	-0.459696	0.565889	-0.227814	-1.54671	-1.46122	-1.06394	-1.62543	-1.50107	-1.48751	-1.35286	0.0913865	0.528382	0.561825	-1.8596	0.13244	-1.65712	-1.92939	-0.231628	-3.5236	-1.7314	-0.323385	-1.36714
b0147	ligT 2'-5' RNA ligase	0.00552536	0.995477	0.42446	-0.146055	0.802541	-0.283449	-2.18345	-0.575442	0.0774672	0.587714	0.740631	1.7378	0.752655	0.397488	0.18702	0.252153	-1.18367	-1.05755	0.932067	2.16711	0.986289	0.53929	0.674068	0.625942	0.396042	-0.642734	-0.718515	-0.0214727	0.564242	-0.199369	-2.65252	-2.40806	-0.344714	-0.422288	0.872078	0.442513	-2.19984	0.647167	-1.2685	0.220282	-2.17499	-2.26102	-0.873267	0.384025
b0149	mrcB murein synthesizing holoenzyme	-1.06143	0.96311	0.0830366	0.338799	-0.661699	-0.368601	-1.46918	0.0563302	-0.67971	0.834024	-1.07773	-0.726554	-1.366	-0.762321	-0.947001	-1.93725	-0.520071	-0.660079	-0.825185	-2.09225	-0.226833	-1.81308	0.573291	0.888618	-0.727938	-0.0219739	-0.28845	0.235732	-0.0634166	0.631548	1.33129	1.39868	0.018856	-0.120871	0.190788	0.297931	-2.02851	0.0631484	-1.72683	-0.457356	0.485799	-0.606553	-1.18107	-1.04236
b0150	fhuA FhuA outer membrane protein receptor for ferrichrome, colicin M, and phages T1, T5, and phi80	-0.0258059	0.756236	-0.079022	-0.864902	0.202239	0.836152	0.362107	0.492213	1.22759	1.16798	0.586766	-1.07432	0.468135	-0.127755	-0.558058	0.975873	-0.00811435	-0.290822	-0.281218	-0.0694137	-0.209924	-1.22098	0.677388	-0.0159148	0.0402558	0.170732	-0.0959986	0.0419602	-0.451092	0.772936	-2.70104	-3.25836	-0.430245	-1.34791	-0.773893	0.294055	-0.513013	0.105342	0.436161	-0.132239	-1.18998	1.54641	-2.19911	-1.00925
b0151	fhuC ferrichrome uptake system	-0.0938343	1.32386	-0.145995	0.484923	0.341589	0.142515	-0.188426	0.327302	-0.709942	0.501219	0.220805	-1.08315	0.172469	0.152809	0.339005	-0.205339	-0.406084	-0.375141	0.103089	0.176827	-1.00294	-1.30492	-0.0711599	-0.211165	0.525993	0.310736	0.488694	-0.063824	-0.975614	-0.358482	-2.33734	-2.60502	0.260041	0.645525	0.466599	0.431995	-2.08057	0.0568357	-0.152677	-0.0817414	-0.132493	-0.992962	0.0391428	-0.678852
b0152	fhuD ferrichrome uptake system	-0.75106	0.720757	1.6897	0.714186	1.28369	0.495078	-0.47827	-0.449809	0.205853	0.214217	1.0062	-0.119752	1.35477	0.740972	0.5466	-1.27192	1.17071	0.965513	0.108479	0.291507	-1.70783	1.27666	0.833547	1.02767	0.0873712	0.253509	0.394908	-0.540539	0.641326	0.632416	-2.29548	-3.00089	-0.0128219	0.84911	-0.232425	-0.407446	-0.360782	1.62032	-0.274818	1.66259	0.267333	1.02381	-0.0459661	-1.6952
b0153	fhuB ferrichrome uptake system	-0.672882	0.882477	1.58772	0.989965	0.329302	-0.804021	-2.69699	-1.76325	-1.96067	0.948832	0.364899	2.09938	-0.379161	0.351097	0.549144	-0.732313	-0.966368	-0.92328	0.848674	-1.14196	-2.61566	-1.42768	1.13979	0.22451	1.6854	0.764602	1.05552	-1.18941	-0.402408	0.917096	-2.19765	-2.60624	-0.55312	0.385748	-1.21866	-0.00388189	-2.83735	0.518099	-1.55005	0.837325	-2.57124	0.6549	-2.28937	-1.35273
b0154	hemL glutamate-1-semialdehyde aminotransferase	-2.15069	0.692437	0.268587	2.83604	1.40871	1.00046	0.877277	2.74913	-0.331774	2.87412	0.0795315	1.25794	0.984142	1.13863	1.41152	-0.243171	-0.895126	-0.000906214	0.921534	-1.42723	-1.55681	0.587269	0.921768	0.808087	0.689084	0.674964	1.21851	0.610694	0.639205	1.22499	-1.91166	-2.1371	-0.0520335	0.849088	1.53098	0.11133	-1.68924	0.999866	-1.11088	2.0216	-1.15806	-0.580911	-0.0676704	2.31936
b0155	clcA EriC chloride ion ClC channel	-0.520339	0.821366	0.404288	0.016406	0.189538	0.448396	-0.0680977	-0.333711	0.600007	0.535369	0.862596	-0.017051	0.691156	0.676699	0.572819	0.302723	-1.53556	-1.63849	0.0572645	-1.04496	0.344286	0.825603	0.954503	0.867865	0.105522	-0.190119	-0.00691498	0.231631	0.184777	1.25159	-2.40884	-2.73909	0.079774	1.31449	0.254205	0.931343	0.797514	0.594765	-1.49827	1.4868	-1.08879	0.25134	-0.651361	-0.431088
b0156	erpA essential respiratory protein A	-0.63703	1.01273	0.875357	-0.29869	-0.287421	-0.477331	-0.846606	-0.524128	-0.0747526	0.551823	-0.0408927	-1.06894	-0.0788237	-0.877955	-0.310424	0.154662	-1.79338	-1.102	2.26086	1.44372	-0.96559	-1.52362	0.0390494	-0.968077	0.602063	-0.841724	-0.290011	0.175434	-0.0590915	-0.773635	-1.23172	-1.40721	-0.825643	-1.22627	-0.266702	1.02062	0.993248	-0.977397	-2.26179	-1.26477	-1.27252	-0.726165	-1.74565	1.44649
b0157	yadS conserved inner membrane protein	-0.371762	1.24662	-1.06166	-0.0583306	-0.59586	-0.229762	0.152978	-1.38336	-0.523382	-0.667717	-0.661144	-0.0397597	-0.289047	0.569256	0.599068	-0.0497911	-1.1912	-1.04709	-0.292394	1.93514	0.339083	-1.61702	0.569496	0.341034	-0.00957718	-0.0932338	-0.115507	0.395085	0.236176	1.35941	0.0598102	0.303496	0.0907588	0.302654	-1.12681	-0.767709	-1.17822	-0.270215	-1.65731	-0.744403	1.37272	-0.506064	-0.199476	-1.04053
b0158	btuF periplasmic vitamin B12 binding protein	0.548476	0.647565	-3.16669	-4.64191	-0.212982	-2.48358	-4.08679	-4.19839	-1.24258	-1.94744	-0.828838	0.594655	-1.17642	-1.89248	-1.97617	-1.51634	-2.10382	-2.02482	-0.156894	-2.24263	-4.86428	-2.15714	-1.13295	-1.1283	0.808393	-1.15177	-0.997779	-0.627218	-3.58225	-2.32107	-5.76686	-5.22403	-0.730078	0.233543	-0.232204	-0.925151	-2.24739	-0.476518	-4.22709	-2.07669	-2.06186	-2.92506	0.267821	-1.82996
b0159	mtn 5'-methylthioadenosine/S-adenosylhomocysteine nucleosidase monomer	-0.926115	0.592783	0.695703	-2.52276	1.72922	0.629997	-0.780068	-1.32161	1.76673	2.95034	-0.529638	-0.760109	-0.030739	0.556046	0.451791	-1.20547	-2.50567	-1.66478	-0.660916	-2.04599	2.91212	-0.253129	-0.189377	-1.52836	0.289179	-1.41278	-0.470802	0.976931	-0.358772	-0.136172	-3.57279	-2.1456	-0.86983	-0.647651	1.10745	0.0458322	-2.62951	0.757946	-2.37044	-1.50565	-1.902	-0.94426	-1.80949	-0.67809
b0160	dgt deoxyguanosinetriphosphate triphosphohydrolase	1.95845	0.276421	-1.01779	-4.40971	0.0127274	-1.73363	-4.34493	-1.63005	2.58559	-3.48519	-1.30598	-2.61023	0.6757	-0.614108	-0.987965	0.205321	-1.62338	-0.567093	0.873193	0.555632	1.57122	0.419667	-0.589339	-0.359524	0.498057	0.671446	1.78015	0.925011	-1.49091	-0.693557	1.64071	2.98568	0.499798	-0.446254	2.05251	0.140272	1.06428	-0.224622	-0.915555	-0.573373	-4.9379	3.24065	0.862089	2.74788
b0161	degP serine protease Do	0.952404	0.565753	-0.313476	-1.04369	-0.240451	-1.04715	-4.49073	-1.13649	-2.32243	-1.36524	0.0201724	0.0895989	-1.2936	-0.776527	-0.794135	-0.819299	0.438916	0.792257	-1.61007	-1.1851	-1.64287	-2.36687	-0.299202	0.806528	0.128149	0.275464	0.9798	0.404419	0.00423418	-1.01025	0.00209797	0.333586	0.694999	0.407955	1.82048	-0.104595	-0.335589	0.854637	-0.23885	0.132292	0.138354	-1.27231	-2.80876	-3.51163
b0162	cdaR CdaR transcriptional activator	0.898356	0.647877	-1.93337	-1.37247	0.0801769	-1.08348	-4.16611	-1.25917	-2.21261	1.51306	-0.196538	0.811717	-0.759978	-0.200988	-0.0996751	-1.25832	-1.3294	-0.562656	-1.96716	-0.809869	0.467143	-1.45081	-0.748667	1.28112	0.383506	-0.501189	-0.427143	-0.506271	-0.314275	-1.2827	-5.2952	-4.20916	1.20399	-0.511017	1.10784	-0.830022	-2.77559	-0.0230885	-0.559247	0.324288	-1.08112	-1.72586	-0.0416793	-2.13613
b0163	yaeH conserved protein	-0.174896	1.05984	-0.457332	LQ	-0.125409	LQ	-1.00232	LQ	0.669614	LQ	-0.123998	-0.197688	0.636075	-0.0964976	0.165122	0.0428344	0.886127	0.893307	-0.290113	1.40789	0.8152	-0.92506	0.188645	1.10513	-0.0287934	0.610539	0.42461	0.938953	-0.122041	-0.203156	2.29263	2.00879	0.223259	-1.04307	-0.231612	1.06811	0.631841	0.421486	-1.25815	-0.270891	-1.36909	-0.483761	-0.516161	0.480774
b0164	yaeI phosphodiesterase	0.161354	1.12445	1.09959	-1.44034	0.491354	0.232143	-1.50189	-0.751091	-0.243193	0.885961	0.852355	0.197518	0.224012	0.787076	0.824929	0.461375	-1.99175	-1.68534	0.782077	0.787567	1.20062	0.758923	0.0145503	-0.803179	0.39473	0.73302	0.734511	0.364212	1.15524	-0.136659	-1.26377	-1.1663	0.529057	-2.13789	0.545409	-0.22333	-1.17502	-0.483126	-0.404457	0.602745	-2.06826	-1.51477	0.897367	-0.798887
b0165	b0165	-0.235981	0.392564	-0.641282	0.618646	0.450915	0.201945	-0.672535	LQ	-0.351267	2.48516	-0.21882	2.80035	0.593812	0.0406862	0.599847	-0.733043	-0.233764	0.418855	1.2689	-0.765436	-1.01904	0.511728	1.5967	0.790921	0.981533	0.224079	0.394531	1.14259	1.64214	1.63564	-1.80658	LQ	-0.470154	-0.23372	0.900202	0.064806	-0.964718	2.25705	-0.496671	0.844803	-0.84206	-0.634216	-0.112518	-0.491372
b0166	dapD tetrahydrodipicolinate succinylase subunit	-1.99445	0.706868	0.24419	-0.440357	2.23714	1.505	-0.755357	0.09738	0.60938	2.40899	1.71457	2.74254	1.42817	0.658811	0.726603	0.823868	-0.776466	-0.658517	0.464859	2.18179	-0.368644	1.48262	1.05329	-0.453398	0.540085	0.657537	1.07531	2.3722	0.785527	0.862256	-1.18355	-1.04514	0.35284	-0.885	1.40408	-0.175433	-0.829482	1.95177	0.857028	0.72825	0.871427	2.00263	0.276889	0.402433
b0167	glnD uridylyltransferase / uridylyl-removing enzyme	-2.24547	0.360304	1.54145	0.436714	3.58986	3.30404	-0.274181	1.08816	2.31359	3.01197	0.0189786	2.48843	-0.715091	0.862874	1.71325	2.86648	0.198368	0.292422	3.82896	-1.29482	5.19961	1.53024	1.69073	2.78401	2.05877	0.620708	1.07435	2.86352	2.597	4.13643	-0.32234	-0.746255	-1.37771	-0.804701	-0.273967	-0.968963	-0.435363	4.48408	-1.97872	1.4155	6.07664	-0.741536	0.852711	6.62159
b0168	map methionine aminopeptidase	-2.18776	0.695822	0.0139202	0.610961	1.0246	1.68378	0.192876	1.871	1.68711	1.17446	0.0970147	0.844313	0.900028	1.54917	1.62193	0.228126	-0.697801	-0.454246	0.506883	-1.19464	0.522572	-0.560859	0.448006	3.69771	0.606918	1.94768	2.07702	0.530727	0.556132	0.861222	-1.01007	-0.205553	-0.362285	-0.436855	1.54356	1.22533	-0.640958	1.62069	-0.745374	0.582433	-0.689722	0.532734	0.0809304	0.0284517
b0169	rpsB 30S ribosomal subunit protein S2	-2.24675	0.574661	-0.456591	0.786157	-0.553058	1.12311	-0.644967	0.199582	0.713339	1.76222	0.372631	1.38081	1.78935	1.46696	1.70591	-0.199409	-0.424159	-0.184899	0.983258	-0.892245	-0.474636	-0.508563	0.55389	2.04356	1.32206	1.02422	0.950128	-0.00602662	1.15076	1.49333	-1.04082	-0.560121	0.219611	-0.0287473	-1.7955	0.458583	-0.567809	1.90651	-0.929923	0.755843	-0.832418	-0.0715435	0.196946	-0.430403
b0170	tsf protein chain elongation factor EF-Ts	-2.35047	0.320018	-0.355558	1.69779	2.92464	3.13352	0.400979	0.378015	2.3062	4.8055	0.603201	2.81004	0.494682	1.69618	1.24753	3.29431	-0.339192	-0.588703	3.75893	-1.31216	-1.16172	-0.772386	2.46623	-0.582668	2.47106	0.113144	-0.292325	1.76681	2.51732	2.22702	-2.03059	-2.20207	-0.6538	0.287437	-2.56254	0.645471	-1.3269	4.96611	-1.62419	4.16062	0.710645	-0.736396	0.628797	0.26089
b0171	pyrH uridylate kinase	-2.36302	0.855783	0.981931	2.35618	2.15254	2.35037	1.52721	1.5661	2.26204	3.6477	-0.321011	0.603238	-0.126818	0.843522	0.105859	0.764995	-0.465042	-0.512589	0.345222	-0.385544	-0.441734	-1.1941	0.604613	-0.981004	0.77815	0.561418	0.530835	-0.795929	0.530673	0.725375	-1.04645	-1.3009	-0.237866	-0.179319	-1.21154	0.486921	-1.20736	1.07519	-1.33998	0.620796	1.00549	-0.532325	-0.00933296	2.75972
b0172	frr ribosome recycling factor	-1.77245	0.628639	4.54546	8.11211	8.7801	4.95687	6.96518	6.48538	6.41576	7.77431	-0.415236	1.00354	-0.182055	0.00891563	0.236508	-1.46624	-0.612338	-0.179116	0.624873	3.59431	-1.2011	-0.744309	0.406467	-0.242586	0.782685	2.29191	1.98917	-1.44294	1.00357	0.947373	-0.958648	-0.858301	-0.480265	-0.312375	-1.96212	-0.458923	-0.964422	1.56135	-1.12673	0.599388	-0.689446	-0.586184	0.00420249	-0.341177
b0173	dxr 1-deoxy-D-xylulose 5-phosphate reductoisomerase	-2.15974	0.529812	-1.35265	5.08387	4.50782	3.03168	0.103293	3.67192	-0.294638	6.19957	-0.531717	1.73924	-0.614256	0.366728	0.128068	-1.92043	0.362813	-0.192943	1.66187	-0.194903	-2.80513	-0.0800709	0.783652	1.62435	1.11692	1.91793	1.84437	-1.39049	1.85486	1.51849	-1.25807	-0.733372	-1.24491	-0.59433	-2.96592	-0.610093	-0.30307	1.86229	-0.49922	1.16326	-0.143491	-2.28745	1.10236	1.82062
b0174	ispU subunit of undecaprenyl diphosphate synthase	-2.19579	0.305514	-3.45304	0.998915	0.130233	1.74272	0.367697	2.22111	0.530123	3.78905	-0.294075	1.45815	-1.79249	2.18362	2.45195	-0.33923	-0.598256	0.244239	4.33816	-0.979234	-3.0726	0.610716	1.18789	-1.25784	1.10936	-1.4896	-0.315777	0.183122	1.63059	1.74912	-2.45533	-1.59059	-1.72409	-0.653522	-2.24608	3.92505	-1.31569	2.47639	-1.07664	-0.0790047	-0.438043	-2.95418	0.948406	-0.182427
b0175	cdsA CDP-diglyceride synthetase	-2.8475	0.426973	-0.154102	2.19874	0.951622	1.99429	-0.254416	1.95306	0.542108	5.75665	4.67397	1.79064	0.241297	2.06193	2.06681	1.26612	5.08426	4.69662	1.39627	-0.854751	-0.929386	-0.579057	2.90806	-0.435962	1.39946	-0.235654	-0.0260316	4.67919	1.67377	2.39348	-1.26741	-1.81276	0.701651	-0.218199	-0.41983	2.47544	-1.02005	2.335	-0.317188	1.21683	-0.119986	0.917142	0.363889	1.44413
b0176	rseP RseP zinc protease	-2.68292	0.347894	-1.54085	0.686829	0.491173	4.72719	-1.25512	2.87996	-2.21768	3.30541	0.451649	2.0363	-0.359795	3.46459	3.1473	4.00866	0.940797	2.89736	1.58681	-0.466229	-2.77262	-0.436678	2.0842	-0.631188	1.69144	-0.881765	-0.328946	1.7734	3.0262	3.28377	-2.2191	-1.24418	-0.691395	-0.453536	-1.04025	3.12788	-0.97657	2.95954	-0.255493	0.0402	1.03483	1.64288	0.365683	6.2188
b0177	yaeT Outer Membrane Protein Assembly Complex	-2.36861	0.459406	-3.09091	3.57659	-1.1187	1.44124	-2.81684	0.171406	-0.241845	1.22903	0.370856	1.58491	2.51098	0.891049	1.2749	-1.8468	1.21109	1.35118	0.73316	-0.417308	-3.57198	0.11321	0.576479	0.113189	0.835085	0.107141	0.408821	-0.618941	1.11568	1.02873	-1.23917	-0.713088	-2.48719	-0.426582	-4.25183	0.230171	0.0158462	1.88157	-0.361774	0.559868	-0.401457	-1.34617	1.56334	-1.58938
b0178	hlpA periplasmic chaperone	-1.50251	1.02094	1.76621	0.0131373	1.76502	-0.415895	1.92871	-1.05574	1.70457	0.879075	1.92361	2.92818	1.91063	1.1211	0.440645	1.87148	-0.856523	0.203335	-0.855048	-0.692502	1.69404	0.506461	0.0478011	-0.870888	1.27352	0.67439	0.479334	1.89531	0.777968	-0.262582	-0.957817	-0.705026	1.9459	-1.32974	1.72085	0.280461	2.06599	1.01507	-2.19964	-0.983775	-1.32894	1.81852	1.89641	1.81675
b0179	lpxD UDP-3-O-[3-hydroxymyristoyl]glucosamine N-acetyltransferase	-2.30034	0.91469	-0.22714	-0.487281	0.0501065	0.83623	-0.116594	-0.489711	0.39038	0.609439	0.574809	1.127	0.0648452	0.316397	0.389744	-0.373032	-0.38111	-0.381996	0.176714	-1.33713	-0.743698	-0.945028	0.423316	-0.878454	0.410059	0.384268	0.281483	-1.2374	0.119498	0.284586	-1.03727	-1.54826	-1.30334	-0.545173	-1.59483	-1.02295	-1.00269	0.423357	-0.9522	0.385429	-0.747066	-0.428831	-0.4602	-0.631383
b0180	fabZ beta;-hydroxyacyl-ACP dehydratase	-1.54534	0.45835	-0.713539	1.32506	-0.199328	0.594936	0.638251	-0.968654	2.43173	1.04334	2.56816	1.80707	1.43231	0.173197	0.198836	-0.5779	-0.485593	0.0482211	1.75658	-0.943763	-1.31536	-0.572888	0.803521	0.162563	1.26658	-0.318305	0.513096	-1.29888	1.79034	1.49323	-1.94423	-0.926625	-1.19175	0.089901	-1.89815	-0.438139	-0.927701	2.00024	-0.267236	0.916629	-0.951569	-0.319615	-0.182333	-0.489612
b0181	lpxA UDP-N-acetylglucosamine acyltransferase	-2.4432	0.442333	-0.375895	0.482219	-0.915994	1.12122	0.449825	LQ	0.0872078	1.11294	1.4257	2.09471	0.68108	1.34052	1.225	0.279215	1.2205	1.02224	1.70506	-1.30103	-0.176229	-1.02034	2.10547	-1.11988	1.86751	0.653995	-0.562872	-1.65512	1.59776	2.21328	0.0120212	-1.29683	0.952043	0.0714508	-2.02998	-0.86891	-1.70639	2.36361	-1.24234	2.20818	-0.309049	-0.21258	0.414731	0.653902
b0182	lpxB lipid A disaccharide synthase	-2.33484	0.423742	-0.826121	-0.229891	-1.46096	1.48766	-0.535043	-0.432276	-0.910277	0.690351	0.69037	1.55251	0.0378543	1.43273	0.667336	-0.545311	0.386938	-0.848037	1.10164	-2.13711	-1.29981	-1.49889	2.16166	-2.04885	1.61165	-0.0390334	-0.925336	-2.51971	1.18826	2.01936	-0.462417	-2.65104	-1.80849	-0.514945	-1.104	-1.54687	-1.95001	2.2328	-2.07563	2.22189	-1.44219	-1.16863	0.15142	-0.478142
b0183	rnhB RNAse HII, degrades RNA of DNA-RNA hybrids	-1.95085	0.371674	-0.109046	0.668967	-1.26631	2.66943	-0.894754	1.95597	-0.599801	2.23207	2.64186	1.76675	1.38626	3.54173	3.0071	-1.11606	3.17097	2.61481	1.18214	-1.3339	-2.00112	-0.902624	3.0225	-2.06114	2.42692	1.49708	1.56035	-0.040011	1.58662	2.03489	-1.75442	-1.81511	-1.82948	-0.766118	0.730774	-0.501695	2.01022	5.15664	-2.63351	1.64573	-0.509935	-1.17244	-1.39415	-0.675142
b0185	accA acetyl CoA carboxylase	-2.42917	0.425733	0.142239	-0.246776	1.09033	3.21001	0.721864	0.0433808	1.15624	5.13616	0.712467	0.913605	0.79106	2.70432	2.76163	0.40693	1.25765	1.81508	0.368351	-2.423	-0.746314	2.27781	2.31337	-1.36596	1.07648	0.560916	0.855133	1.95247	1.16152	0.862086	-0.749414	-0.988247	0.569496	0.7427	-1.12474	1.4609	-1.46663	1.84445	-1.99804	2.22553	-1.93331	1.08641	-1.08265	1.90088
b0186	ldcC lysine decarboxylase 2	-0.314357	0.784948	-0.300861	0.65044	0.0502954	0.667496	-0.267432	0.436386	0.704768	1.51503	-0.199003	-1.16875	-0.416989	0.164469	0.0573267	0.0338798	-1.89204	-1.58992	1.12992	-0.571341	-0.626685	-0.940562	0.848027	1.22912	0.300018	0.113325	0.114785	-0.116367	1.38468	-0.113797	0.211494	0.416443	-0.0131643	0.335712	-0.505046	0.0612679	-0.627862	0.10304	-1.88918	0.313343	-2.47158	0.611731	-0.232861	0.616298
b0187	yaeR predicted lyase	-0.961584	0.553253	1.03376	0.0525857	0.645232	2.0827	-1.14613	0.545242	1.72022	3.3707	2.1292	0.391843	1.49715	2.38058	2.30573	-0.256276	1.74715	1.10828	0.317848	-0.452073	-1.58243	-0.569296	1.16037	0.26566	0.707691	0.464539	0.998071	0.0570458	2.01945	1.0336	0.884495	1.23391	0.394955	0.851973	-1.22117	1.40563	-0.78626	2.90213	-1.12632	0.830663	-0.845094	2.73487	2.09879	2.59689
b0188	tilS tRNA Ile-lysidine synthetase	-1.91251	0.518999	-0.118806	-0.0726194	-1.48099	1.91405	-1.37617	0.798658	-1.08303	2.66248	1.17904	2.59104	0.592517	2.26559	1.96615	-0.0580794	1.57918	0.91473	1.46712	-1.27115	-2.19773	-0.800931	1.20326	-0.79462	1.08274	0.0174139	0.663896	-1.26238	1.55214	1.2501	-0.723152	-0.640849	-1.08908	0.505851	-2.84265	-0.101557	-1.32704	1.77761	-1.4927	0.943071	-0.312831	-1.0406	0.985632	-1.31932
b0189	rof Rho-binding antiterminator	-0.457339	0.852655	-1.30544	0.543449	-0.613978	0.264208	-1.22793	0.0319352	-0.713407	0.939232	0.106331	0.529361	-0.247977	0.904587	0.627111	-0.620721	0.75059	0.559073	1.91011	-0.84508	-1.58489	-0.444965	-0.0280061	0.782367	0.111779	-0.301036	-0.0308926	0.582652	1.30941	0.258885	-1.27127	-0.822469	-0.928643	-0.55794	-0.616544	0.514992	-0.994391	0.511961	-0.709772	1.69305	-0.663316	-1.32454	-0.0609784	-0.597731
b0190	yaeQ conserved protein	-0.463027	1.30558	-0.454604	0.623876	0.364714	0.188615	-0.121646	0.625442	-0.238838	0.950406	0.675493	1.53227	0.122042	0.2309	0.309429	0.0146518	-0.424665	-0.291304	0.400723	-1.25317	-0.0467495	0.602414	0.371254	-0.922194	0.207085	0.461052	0.345729	-0.321604	-0.576817	0.122379	-1.92367	-1.50467	0.845227	0.460807	1.08614	0.405052	-1.56108	-0.419931	0.993543	0.684441	-1.27303	-0.725856	0.537718	-0.614908
b0191	yaeJ conserved protein	-0.098776	1.36098	-0.377263	0.278602	0.112479	-0.409431	-0.527411	-0.503892	-0.788367	-0.885593	0.169828	-0.681201	0.329205	0.454821	0.316037	0.129279	-0.567336	-0.462143	-1.46291	-1.96378	-0.971773	-0.651267	0.402445	-0.280627	0.461529	0.438392	0.317226	-0.342023	-0.249369	-0.961089	-2.52921	-2.0282	0.337137	0.563866	0.601726	-0.0685803	-2.13758	0.731437	-1.00831	0.671239	-2.76984	-0.831449	0.00346574	-0.241249
b0192	nlpE outer membrane lipoprotein NlpE, involved in surface sensing	-0.362696	1.07642	-0.185896	1.56029	0.197902	-0.0708953	1.32643	-0.647044	0.55807	1.65114	-0.0902102	0.362594	-0.0659178	0.376774	0.387865	-0.545993	0.44594	0.368007	0.192619	-0.730451	-1.10393	-0.753695	0.339208	0.0551946	0.108361	-0.432123	-0.263133	0.288229	-0.576792	1.44632	-2.15155	-2.04671	-0.386937	0.324553	-0.779241	-0.467109	-1.37385	-0.501896	-1.60645	0.605081	-1.78123	-0.786032	-1.00365	-1.01451
b0193	yaeF predicted lipoprotein	-0.0198395	0.876519	-0.629389	-1.63259	0.293507	0.0804373	2.08257	0.353548	1.94849	1.31143	0.26206	-2.98274	0.0934429	0.434618	0.029607	-0.747833	1.29512	0.959267	-0.0831652	2.85388	-1.71775	0.373808	1.33013	-1.64036	0.93399	-0.0203257	-0.31755	-0.567272	-1.9315	1.687	-4.10389	-4.01847	-0.625538	-1.33521	-1.35913	-0.0511242	1.44	-0.234746	-0.353834	-0.0895882	-4.67318	1.07033	0.392645	1.75972
b0194	proS prolyl-tRNA synthetase	-1.64317	0.377986	-2.84744	0.264501	-2.32494	0.540268	-0.886832	-0.141153	-1.11371	2.48312	-2.29796	1.0121	0.303658	0.407379	0.319687	-3.56052	-0.24236	0.320846	0.850359	-0.299347	-4.67074	-1.64308	1.0881	-0.172277	2.60363	0.223866	0.575144	-2.22936	1.13699	1.44435	-3.60068	-3.23692	-0.25753	-1.04934	-5.40158	-1.1461	-1.53157	1.87167	-1.96632	0.977505	-1.94551	-2.84069	-1.2453	0.229014
b0195	yaeB conserved protein	0.0370322	0.477511	-1.41255	-0.610439	-0.0698593	-1.00775	-4.55026	-1.20564	0.299029	-0.659059	-0.349214	-0.74308	-2.3507	-0.706106	-1.44064	1.61066	1.28991	1.10436	-0.635278	-0.434257	-4.82631	-1.58832	0.285168	-1.52647	1.51392	-0.56853	-0.6484	-0.855573	0.501883	1.70676	-4.20964	-4.08352	0.891813	0.0301808	0.323263	-1.04221	-1.06323	-2.58833	-4.22285	-0.590411	-3.18001	-1.31119	-3.27124	-0.141023
b0196	rcsF RcsF-P	0.57762	0.583487	0.797868	0.862393	-0.277062	-0.159319	-2.81332	-0.844071	-0.518344	-0.866924	-2.26493	-2.41547	-2.88461	-1.93176	-2.33825	-1.94861	-0.854285	-1.0255	-3.26988	-5.22117	-1.55251	0.247873	0.354504	-0.786872	-0.138276	-0.0709069	-0.379038	-0.886001	-1.40888	-1.41086	-4.56258	-5.65024	0.537257	1.12254	1.02341	-0.559561	-4.68551	-2.04588	0.531053	-1.71691	-0.944672	-2.25402	-1.61982	-3.18098
b0197	metQ L- and D-methionine uptake ABC permease	-0.440462	0.522279	0.142028	0.463123	-0.78564	0.569437	-3.33278	-0.213707	2.52457	1.35159	0.96631	1.11299	-0.757851	0.281376	0.769244	3.65389	3.84594	3.30892	0.659611	3.134	4.10641	-0.30993	0.00278762	0.933098	-1.02966	2.61734	2.55551	2.32379	0.2999	0.0972311	-1.42535	-0.908991	0.90441	1.66496	2.16024	-0.879181	-0.0328988	-0.824145	-3.2597	-1.05029	-2.4648	-3.64707	-2.54247	0.865886
b0198	metI L- and D-methionine uptake ABC permease	-0.516711	1.19751	0.364642	1.3553	-0.109266	1.31061	0.00631416	1.05506	1.03681	1.62977	0.501246	1.1129	-0.228658	0.196011	0.387428	1.68008	0.364194	0.117916	2.36104	1.23474	2.32192	-0.617475	0.674009	1.45528	-0.16788	0.472314	0.785588	1.2701	0.783576	1.42355	2.06946	2.11724	0.115527	0.586585	0.482369	0.804768	1.88677	-0.279229	-0.92024	-0.222986	-1.82844	-0.339689	0.0976272	1.22659
b0199	metN L- and D-methionine uptake ABC permease	-0.954702	0.658384	-1.15764	-0.221031	1.1516	1.3393	-0.284105	-0.971886	0.690494	3.05087	1.13461	0.105586	-0.256287	1.73519	1.76917	1.45706	2.76114	2.96419	1.36774	0.190828	-0.0533991	1.1558	0.689151	-0.188695	0.915613	0.934908	0.751437	0.0181055	0.691959	1.11795	2.13371	2.65858	0.285514	0.824305	1.827	0.895425	-0.243304	1.73202	-1.36026	-0.705421	-1.7476	-2.1441	1.65089	0.694089
b0200	gmhB D,D-heptose 1,7-bisphosphate phosphatase	-1.20502	0.391974	-2.0605	0.105213	2.18015	0.572004	-1.75082	-0.454606	1.02042	2.44164	0.547995	0.569123	-1.12188	0.681277	0.62123	-1.29309	0.0951865	0.592435	0.368576	-1.46716	-1.12736	2.11357	0.79967	0.486981	0.281616	-0.792067	-0.586247	-0.0884132	1.98857	4.3294	-2.10648	-1.36921	1.09623	0.375033	3.025	1.00526	-1.67865	1.89732	-1.69559	0.209752	-1.85079	-0.633504	1.51433	-1.30111
b0207	dkgB 4-nitrobenzaldehyde reductase [multifunctional]	-0.712689	0.844316	-0.331643	1.20902	1.1996	0.863966	-1.76317	-1.16846	0.451412	1.41277	-0.936012	1.66381	-0.552379	0.351055	0.0742223	-0.541525	2.15113	1.7362	-1.39384	-1.56606	-1.95305	-2.17745	-0.132643	-1.77354	0.468266	0.600387	0.382409	-0.314076	-1.19457	0.0186505	-1.14167	-1.00432	1.85213	-0.525892	1.78351	1.47735	-1.45381	-0.320788	0.742614	0.714582	-2.06178	1.22165	-1.24565	-1.13793
b0208	yafC predicted DNA-binding transcriptional regulator LYSR-type	-0.888294	0.873761	-2.06527	LQ	0.201038	0.939882	-2.29566	LQ	0.984793	-0.600011	0.459713	2.35379	-0.349681	0.733624	0.75929	0.674092	-0.354303	-0.286708	-0.267268	1.70467	-1.15562	-2.52598	0.183953	0.156162	-0.523294	1.12232	1.10135	0.297681	-0.164824	1.0708	1.1201	1.52843	0.348135	0.611467	-0.0711342	-0.239984	1.7478	-0.168792	0.498474	0.579558	0.334224	0.236191	0.394019	-1.21238
b0209	yafD conserved protein	0.062181	0.834588	-1.67119	-1.47739	-0.660271	-0.819038	-3.47638	-1.49258	-1.09158	-2.58896	-0.390781	1.27785	0.499394	1.93015	1.60554	0.469655	-0.968849	-0.881401	-2.4462	-2.65777	-0.179568	-3.13926	0.562873	0.502988	2.9503	2.65291	2.61704	-0.0538929	-1.61334	-0.65079	-2.91201	-2.18457	-1.60473	-2.53759	0.638951	0.112893	-3.07782	-1.74377	1.95898	1.04188	-3.58606	1.72571	-1.68575	-1.87442
b0212	gloB glyoxalase II	-0.478256	1.08097	-1.41704	0.833399	0.424814	0.286135	-0.48372	0.253373	0.0196537	-0.724779	-0.626932	-0.546776	-1.30543	0.969895	0.692905	0.424729	-0.192856	-0.115219	-0.566241	-1.34174	-1.42905	-1.04489	-0.303918	0.605035	-0.364624	0.195661	0.0937268	1.2694	0.296842	0.332425	-1.54282	-1.04502	-0.610955	0.353806	-1.79597	0.514631	-0.795004	-0.142464	-0.848294	-0.252371	-1.42641	0.418924	1.50685	-0.861162
b0214	rnhA RNase HI, degrades RNA of DNA-RNA hybrids, participates in DNA replication	-1.40225	0.427679	-0.424543	0.296703	-0.451493	1.39128	-0.166645	0.189877	-0.211407	1.00719	1.36703	1.43039	0.976368	0.0136837	0.295371	-0.549623	-0.733398	-0.0680585	0.783178	-1.04555	1.48059	-0.0257705	0.536834	-0.0905505	0.732552	0.614428	1.1049	2.33343	1.27866	1.60784	0.629301	0.672823	1.81538	0.697404	-1.9605	1.07516	-1.21327	1.97125	-0.556958	0.691366	-0.850202	0.580271	-0.179027	-0.431333
b0215	dnaQ DNA polymerase III, epsilon; subunit	-1.55633	0.6738	-1.18081	0.0902664	-0.726225	0.925959	-1.37699	0.360784	0.179922	0.287472	0.220756	-0.0528871	-0.216713	-0.597068	0.0766363	-0.66455	-0.466589	0.312001	-0.593522	-1.4171	-1.09944	-0.530447	-0.110682	1.32725	-0.319539	0.812666	1.01221	1.1109	-0.251458	-0.23158	-1.11133	-0.624214	-0.437065	2.12682	-0.543953	0.241448	-1.38245	0.239514	-0.783265	-0.397887	-1.58702	-1.1238	-0.184316	-0.609571
b0217	yafT predicted aminopeptidase	0.866764	0.629753	-0.426169	-0.911601	-1.27278	-2.2422	-3.81448	0.113027	-0.657815	-2.73183	-0.519398	-2.57716	0.437592	-0.812848	-0.854986	-0.72635	-0.733221	-0.869486	-1.7114	-4.33243	1.10598	-0.331756	-0.160293	-0.949341	-1.00676	-0.251887	-0.295966	0.178808	-0.403638	-2.49447	-1.3596	-1.05037	-0.514709	-0.0910455	0.352617	0.0356818	0.848712	0.306382	0.143151	-0.236758	0.94787	-1.08945	0.940571	-1.41486
b0218	yafU predicted inner membrane protein	1.05492	0.377679	-2.42715	-1.14925	-0.752788	-1.10486	-5.21562	2.43884	-1.29588	-2.71804	1.33685	-2.23261	2.46526	1.00523	0.321815	1.39741	3.22556	2.00749	-2.39434	-4.52686	0.900034	0.8125	1.30882	2.35243	1.43249	-0.195721	-0.87934	3.06749	5.12389	-1.72532	3.38879	1.56773	0.349068	-0.288466	2.98099	1.54185	0.0194147	0.299295	1.60701	2.03833	-3.7624	4.71577	0.662967	0.971183
b0219	yafV predicted C-N hydrolase family amidase, NAD(P)-binding	-0.0405094	0.71215	0.685384	-0.697037	-0.386128	-0.0964043	0.0825212	0.360235	-0.699399	-0.699342	0.152374	-1.27362	0.809599	0.533462	0.801842	1.22293	-0.0454383	0.707964	-0.708725	1.15316	-2.23891	-0.882003	0.664541	-0.168153	0.151444	-0.83773	-0.181297	-0.309091	-0.00810005	-0.150454	-1.37372	-0.246906	-0.0151623	1.70722	0.379715	-0.541644	-1.15101	0.477673	-1.76248	-0.911935	-2.22119	-0.176806	-1.75566	-0.488559
b0220	ivy inhibitor of vertebrate C-type lysozyme	0.476313	0.583265	-0.90176	-1.25779	0.111908	-0.627081	-2.13344	-0.112806	-0.240687	-0.419743	0.186183	-2.64352	-1.38048	-0.636114	-0.5922	-0.417152	-0.175523	0.057394	0.975718	-2.24502	-3.38909	1.17087	-1.36764	0.672712	0.708933	0.355754	0.0737252	-1.2177	-2.16121	-0.749537	-0.0126995	0.0817283	0.522781	0.194192	-0.0529098	-0.446778	-2.70941	0.360694	2.47793	-1.24255	-3.27374	-2.92188	-2.98281	-0.816225
b0221	fadE acyl-CoA dehydrogenase	-1.39226	0.685659	0.813639	1.46478	0.361407	1.08297	0.760918	0.850847	1.73903	1.01125	0.938525	0.225871	0.728301	0.969819	1.12089	0.347625	0.605444	0.744247	1.76351	-1.64242	-0.353823	-1.01546	1.7684	-0.828949	0.928728	0.311341	0.455358	0.651442	1.24826	1.37682	-1.18011	-1.36351	0.308485	-0.0615716	0.0228961	-0.154685	0.952472	1.71798	-1.34752	1.54734	0.00185434	0.30343	0.463621	1.82739
b0222	lpcA D-sedoheptulose 7-phosphate isomerase	-1.59947	0.698153	0.0562665	1.08878	-0.352385	0.699693	0.497351	2.65437	-0.0298993	0.914696	0.175201	0.349287	0.64488	0.801695	0.534404	0.404191	-0.271011	0.122551	0.588909	-0.796695	0.136606	-1.11299	0.914339	-0.573438	0.747432	-0.600869	-0.678642	0.493517	0.533168	0.512726	2.97211	2.90424	-0.976455	0.574934	-1.35517	0.0763139	-1.07872	0.715646	-1.31448	0.36946	-0.655204	-0.257903	-0.119193	3.8143
b0224	yafK conserved protein	0.265814	1.4059	-0.610423	0.0176921	-0.0600409	-0.283518	-1.30784	-0.771581	0.0309452	-0.0641919	-0.692936	-1.2401	-0.166008	-0.626573	-0.582579	-1.28421	-1.6742	-1.37638	-1.09164	0.0507142	-0.843076	-0.671165	0.389873	0.40137	-0.112477	-0.975176	-0.984475	-0.143058	-0.16019	0.730947	-1.58372	-1.25014	-0.0190744	-0.295056	-0.298491	0.271777	-1.09742	-0.894976	-0.526829	-0.944232	0.0626961	0.987638	-0.430176	0.0289589
b0225	yafQ toxin of the YafQ-DinJ toxin-antitoxin system	0.00532127	0.473063	-2.12807	0.0288096	-0.734374	LQ	-1.73517	LQ	1.11289	-0.00446375	-0.203919	0.758292	-0.221926	-0.47547	-0.574502	-0.98073	-0.934619	-0.437129	0.900006	-1.29147	-1.28855	-0.639813	0.134496	-0.4895	0.269478	-0.395453	-0.273562	-0.932862	0.399449	0.527249	0.586048	0.547636	-1.24896	-0.0697444	0.167989	-0.257863	0.486196	1.81258	-0.695193	0.152856	-1.55395	-0.00292635	-0.200828	0.253558
b0226	dinJ antitoxin of YafQ-DinJ toxin-antitoxin system	-0.154436	0.562224	-1.07458	-0.708828	-0.330635	-1.08145	-1.61047	-1.30415	1.73966	-0.999693	-0.728621	-0.513943	-1.2653	-1.47325	-1.07477	-1.53343	-1.90378	-1.79129	-0.00230844	-1.14248	0.0866429	-0.852635	-0.733508	-0.808407	-0.649501	-0.975707	-0.904547	-0.287217	-0.201848	-0.255894	0.830629	-0.210026	-0.646569	0.517799	0.18039	-0.967625	-1.05289	0.211127	-2.03276	-0.479484	-2.29863	2.33953	-1.45447	-1.07539
b0227	yafL predicted lipoprotein and C40 family peptidase	-0.142147	0.51384	-2.70171	-2.2225	-2.4245	-0.542155	-3.22147	0.389435	0.782288	-1.37517	0.479249	1.24219	0.662197	-1.51227	-1.11688	-1.62715	-3.44154	-2.9301	0.71092	-1.50212	1.31497	-3.34156	-0.354107	-1.47561	-0.880767	-2.3125	-2.02647	-0.788633	0.632264	1.88219	2.01573	2.76213	-2.23022	0.0274783	-2.92675	-1.79272	1.85285	2.102	-1.16576	-1.49315	-3.57521	-1.15056	-1.56333	2.80101
b0228	yafM conserved protein	0.420631	0.591437	-3.58001	-2.19198	-0.834301	-0.915632	-2.66977	-0.0912685	0.741348	-1.27455	0.802036	-0.973345	-1.64048	-0.488543	-0.556834	-0.369966	-2.94246	-2.10192	-2.00803	-1.69781	0.403537	1.27552	-0.678089	1.00944	-0.106796	-0.310018	-0.387758	-0.878512	-2.18934	-0.747146	-3.70578	-3.21508	-0.398189	0.0360164	-3.57163	-1.45914	-0.450739	-0.705073	-0.85612	-0.478104	-2.99943	-1.30966	0.11214	0.470969
b0229	fhiA	-1.3219	0.652455	-0.128113	-0.53744	0.60012	1.98864	-2.70498	-0.223052	-0.633215	1.83566	0.866749	1.79633	0.144943	0.534907	0.431649	0.457325	1.03448	1.37328	2.1804	-1.50682	0.659531	-1.3257	1.27896	-0.030445	1.29023	-0.781755	-0.724076	-0.340751	0.447928	1.54538	-1.74895	-2.22084	-1.00352	0.691608	-2.11598	0.773588	-1.55448	1.24389	-1.17966	0.704535	-0.199248	2.02804	-0.057613	1.90785
b0230	mbhA	-0.641918	0.644192	-0.660161	-0.116873	0.835045	0.831769	-2.40937	-0.57703	1.57857	0.265741	0.302007	0.0303337	-0.199546	0.912298	0.838586	0.129732	-0.537021	-1.01533	0.866211	-0.0561274	-1.051	-1.54758	1.01688	-1.499	0.646441	-0.200042	-0.40911	-1.45205	0.825878	0.321289	-1.31724	LQ	-0.5646	0.948069	-0.252638	1.17044	0.706751	0.750733	-1.51861	0.756584	-1.37293	0.419034	-0.726198	-2.12087
b0231	dinB DNA polymerase IV (Y-family DNA polymerase; translesion DNA synthesis)	-0.25469	1.04365	-1.19035	-0.432692	-0.30744	0.19149	0.495914	0.239453	-0.970146	0.0629742	0.518412	-0.859458	0.455735	0.232354	0.254696	0.0219514	0.0565848	0.239445	-0.967985	-2.03122	0.652909	-1.28507	0.483836	-0.222723	1.02061	0.490721	0.635695	0.408193	-0.682187	-0.230106	1.45524	1.38757	-0.465452	-0.346964	-1.51887	0.587577	0.14022	0.347063	1.21489	-0.292077	-2.02432	0.708964	-1.13288	-0.984924
b0232	yafN conserved hypothetical protein with a possible role in spontaneous mutagenesis	0.988881	0.550197	-0.812705	-1.94379	-1.23935	-1.34938	-1.72948	-0.622387	0.430519	-2.0373	1.58928	-0.467394	0.462706	-0.63859	-0.648593	-0.31963	-0.0755768	-0.0929806	1.17332	-2.78178	0.488748	0.870664	-0.201414	-0.494302	-0.135044	0.666145	0.543302	-0.999905	-0.430708	1.51354	-2.77199	-2.26418	-0.207237	-0.540133	0.237702	-0.226556	-2.12501	-0.189211	-0.692528	0.167729	-2.88232	-1.63847	-0.794695	-2.27053
b0233	yafO conserved protein with a possible role in spontaneous mutagenesis; toxin of a putative toxin-antitoxin pair	2.32283	0.574071	0.122689	-1.02767	-0.288738	-1.51639	0.161399	0.239839	-1.03823	-4.6673	1.61297	1.33535	0.7414	-0.256405	-0.218569	0.781719	1.61824	1.09928	0.295535	-2.71842	-0.159814	0.678509	-0.424121	-0.286049	0.736078	0.761492	0.109125	0.425041	0.46797	-0.801762	1.94346	0.769889	1.54372	-0.0830507	0.702746	-0.436622	-1.37585	0.208764	0.943612	1.10921	1.51152	0.307475	1.52095	-1.50077
b0234	yafP predicted acyltransferase with acyl-CoA N-acyltransferase domain	0.109347	0.396429	4.6071	-0.363597	3.49759	-0.430077	1.03496	-0.542498	2.4755	-0.115129	5.08951	1.31122	5.3952	0.543762	0.555954	3.9315	0.0179259	0.088807	0.87275	0.495149	2.59143	0.369992	1.25269	0.160561	1.03583	0.396342	0.383007	3.59048	0.899185	1.7581	-1.8412	-1.26246	4.3361	-0.0313678	4.53127	0.124454	0.0576745	2.07939	-0.648034	1.13778	-0.376649	2.75163	0.322165	2.12451
b0235	ykfJ	2.4659	0.41479	-2.24168	-1.11258	-4.33913	-2.9156	-0.596983	-1.7345	-5.78261	-8.8658	-2.41268	1.33041	-2.43813	-0.569226	-0.419176	-2.55538	-5.04467	-5.04218	-0.94036	0.12313	-2.45678	-0.892919	-1.18138	-1.2795	-0.633744	0.0542199	0.809951	-3.1491	0.995047	2.26498	-0.798134	-0.555719	-5.06585	-1.98112	-3.4354	0.724229	1.96995	2.12114	-1.30444	-0.878987	-6.94027	-2.55887	-0.469415	-3.34033
b0236	prfH	-0.241637	0.636498	0.734006	LQ	0.475144	LQ	0.235024	LQ	0.197301	-0.461307	0.810738	LQ	0.328181	-0.644495	LQ	0.638841	0.191491	LQ	0.365541	0.251858	-0.224282	LQ	0.410909	0.545566	-0.617941	-0.595378	0.0900454	0.738278	-0.238438	-0.187191	-3.12103	LQ	-0.582694	-0.333882	-0.0155582	LQ	LQ	LQ	-1.45835	-0.00716266	-2.23997	-0.088277	LQ	1.04469
b0238	gpt xanthine phosphoribosyltransferase [multifunctional]	-0.743438	0.596079	-0.0224521	0.173057	-1.18585	-0.0301302	-2.27484	1.61864	0.274815	1.01326	0.750413	-0.0957232	1.64905	0.6242	0.907402	0.951813	0.118769	0.213381	-0.117796	-2.2652	-1.33531	-0.645059	-0.0718798	-0.665453	0.179803	-0.424927	0.0356494	0.779038	-0.402769	-0.10975	-2.18582	-2.02398	-0.649401	-1.79361	0.49952	-0.598011	1.64067	1.2367	-1.39795	-0.346808	-1.54223	-0.335221	-1.1099	-0.409612
b0239	frsA fermentation/respiration switch protein	-0.619667	1.1059	0.0753706	-0.0991571	0.252209	1.33736	-1.79448	-0.744748	0.426557	0.653891	0.681024	1.09185	0.288099	1.21624	1.29071	-0.0954301	0.571076	0.541259	0.869851	-0.131075	0.230851	0.434588	0.68039	0.498099	0.774058	-0.173756	0.141986	0.57344	0.69218	1.34873	0.542783	0.947969	0.241638	0.0923566	-0.438623	0.224316	0.980511	0.890806	0.728851	0.329091	-0.277226	1.30768	-0.727196	0.279089
b0240	crl Crl transcriptional regulator	1.23983	0.425258	-3.90893	-1.32374	-1.62649	0.138969	0.43486	-1.79462	-3.4093	-1.24075	-0.660083	-4.20853	-0.874296	0.50091	0.277196	-0.594389	-0.953217	-0.53947	-0.752441	-0.489341	-5.04476	-2.31627	-0.740193	1.14508	-1.80523	-0.324316	0.290118	-1.37979	-2.04249	-0.320551	1.67783	2.33563	-1.95423	-0.200916	-2.18579	1.14799	2.64377	-1.74508	-0.723401	-2.04098	2.31253	-1.40692	0.377841	-1.27299
b0241	phoE outer membrane pore protein E	2.93267	0.396419	-1.77975	-1.69302	-1.23735	-0.420048	-0.897656	0.152619	-5.96687	-4.84127	0.489398	-1.74534	1.21491	0.0332756	-0.030456	0.932002	-0.0083373	-0.141792	-0.928532	0.353418	0.148654	-1.59519	-0.457858	0.134755	-0.700796	0.924267	0.752533	1.21819	-0.0743329	-0.986268	2.4956	2.79011	0.919312	-0.520617	-0.812655	0.698209	2.19049	-1.14528	-0.410203	-0.808754	1.53374	-1.30812	1.40366	0.514958
b0242	proB gamma;-glutamyl kinase-GP-reductase multienzyme complex	0.152235	0.465043	-0.842544	0.276409	1.01854	0.0611443	-3.52878	1.25776	-2.21098	-0.539625	0.0676965	3.39885	1.45073	1.15185	1.75234	0.98126	-1.00113	0.462063	1.25004	-3.60996	3.1529	-0.460055	1.19709	-0.255687	0.359422	0.187347	1.32667	1.55077	-1.10775	1.04481	0.0305997	1.6614	1.43332	2.08566	0.219093	1.22893	-3.42732	1.01711	2.00742	0.309996	0.569381	2.88664	0.787778	2.06264
b0243	proA gamma;-glutamyl kinase-GP-reductase multienzyme complex	-0.328576	0.627377	-0.0863199	-0.828854	-0.488948	-0.0781737	-0.321097	0.988206	-1.11483	-0.894009	-0.618197	-1.34923	0.0569118	-0.732549	-0.37414	0.200834	-1.16281	-0.606491	-2.08946	-3.62544	-0.649699	-1.44568	0.656874	1.11179	-0.163093	-0.936141	-0.647274	-0.654364	-0.100117	-0.817487	-3.30299	-3.79365	-0.990066	-0.620257	-0.953081	0.151641	-2.93471	0.87285	-1.40873	0.935	-3.01621	0.496732	-2.23665	-1.95775
b0245	ykfI toxin of the YkfI-YafW toxin-antitoxin pair	0.151454	0.907425	0.665872	0.344435	-0.533129	0.0720321	-0.791851	LQ	-0.579592	0.146879	0.749173	1.05025	-0.408376	0.262675	0.124477	0.0727177	-1.3206	-0.5173	-0.475066	-1.05831	-1.45025	0.1006	0.151544	0.115666	-0.311077	0.242265	0.26571	-0.146366	0.732002	0.582305	-2.17072	-1.55692	-0.450589	-0.725564	-0.704394	-0.312292	0.603203	0.639251	0.180428	0.034798	-1.44576	0.725056	-0.143242	-1.58759
b0246	yafW antitoxin of the YkfI-YafW toxin-antitoxin pair	-0.245887	0.519378	-0.352945	1.48829	-0.34793	1.20169	2.70308	-0.201037	-0.593642	1.18348	1.33758	1.033	0.529691	1.21486	1.01136	1.48299	-0.474111	-0.595979	0.375368	-0.649599	0.0529439	0.523183	1.18227	-0.313849	1.16487	0.229822	0.484632	-0.0236808	1.70904	1.21958	-2.2421	LQ	-0.771847	0.426877	-1.63032	0.323713	2.5497	1.79742	-0.0869996	1.47805	-1.11193	2.64033	-1.20951	-0.535762
b0247	ykfG CP4-6 prophage; predicted DNA repair protein	-0.924947	1.02343	1.42889	0.376469	0.000845605	1.21101	0.0202627	-0.326293	-0.541722	0.813442	0.807037	0.932252	0.602805	0.109437	0.386049	0.25954	-0.68418	-0.586289	-0.620426	-0.705752	-0.0462295	-0.857613	0.771012	-0.420876	0.258208	0.828206	1.0757	0.294915	0.216122	0.858352	-1.81404	-1.49377	0.00687237	-0.501829	-0.58086	0.665131	-0.761858	0.870654	-0.730693	0.218727	0.100315	1.90664	-0.399276	0.236482
b0248	yafX CP4-6 prophage; predicted protein	0.400264	1.45946	0.995204	0.252296	0.718767	0.262368	-1.30933	-0.683977	-0.028783	0.797619	0.139144	0.832744	0.403639	0.473649	0.49475	-0.24235	-0.304771	-0.148785	-0.777718	-0.201141	-1.34776	-1.25333	0.749046	0.133243	0.727271	0.934066	0.953828	-0.0690896	0.0432697	0.425015	-1.61128	-1.22259	0.830665	0.950804	0.300457	0.0717211	-1.47853	0.496045	0.527614	0.301435	-0.657514	0.841719	-1.31498	0.190005
b0249	ykfF CP4-6 prophage; predicted protein	-0.490716	1.09096	1.01934	0.0390083	-0.297898	0.392964	-0.894429	0.149784	-0.67772	0.422987	0.334855	0.541814	0.111436	0.387564	0.380543	0.492347	-0.497882	-0.208881	-0.0149237	0.489403	0.139585	-0.447449	0.86244	0.596493	0.208245	0.37259	0.696641	-0.0678937	0.178714	-0.0634263	-0.330491	-0.105402	-0.13334	-0.315143	-1.0486	0.394219	-0.758814	0.45271	-0.205274	1.15036	-0.342599	1.39243	LQ	-0.705946
b0250	ykfB CP4-6 prophage; predicted protein	-0.140641	1.38468	0.56726	0.707641	0.781327	1.19826	-1.34567	0.938138	-0.0980298	0.944665	0.816322	2.0919	0.70856	0.587252	0.603484	0.223415	-0.354456	-0.191316	0.278824	1.53208	1.90598	1.26867	1.3625	0.50773	1.31214	0.484877	0.513798	1.38226	0.945551	-0.515287	2.1438	2.05633	0.329622	0.568405	0.616083	1.62575	-0.94089	0.503391	0.899133	0.611763	1.58403	1.41768	0.930514	-0.956334
b0251	yafY CP4-6 prophage; inner membrane lipoprotein	-0.329725	0.394815	1.7427	-1.86965	-0.837719	0.356056	-4.60533	-0.30116	1.41476	1.39497	-0.564638	-1.95883	1.00093	-1.3782	-0.71362	0.517097	-1.98845	-0.893386	-0.787683	-0.0626911	-4.28854	1.4864	2.10182	-0.29278	-0.154648	-1.66117	-1.23321	-1.15322	-0.774197	-0.386491	-4.07131	-2.77254	-2.10549	0.444216	0.43135	1.5838	-3.7572	1.08051	-2.27405	-0.376212	-0.865854	-0.45219	-0.749307	-1.76906
b0252	yafZ CP4-6 prophage; conserved protein	0.0606326	0.726885	0.148493	-0.643134	0.270486	1.99741	0.105729	0.509966	-1.96566	1.65152	0.212287	-0.135045	0.633325	0.421645	0.535496	0.686458	-2.49961	-2.56193	1.9713	-0.390805	0.526329	-0.91445	0.984918	1.34655	1.3334	0.279913	0.292362	-0.182547	0.579997	0.04052	-2.7527	-3.28267	0.279869	0.388319	-2.19221	1.2201	-2.6341	0.859192	0.971584	0.466442	-0.8185	2.01412	0.902521	2.05169
b0253	ykfA CP4-6 prophage; predicted GTP-binding protein	-0.170894	0.800318	0.258338	0.0886987	-0.602009	0.357214	0.243357	-0.199606	-0.336042	0.989267	-0.209387	-0.174665	0.36025	0.239051	0.442821	0.232776	-0.5821	-0.314703	-0.622402	-0.320686	1.02016	-0.514841	0.88653	0.936878	0.15927	0.156781	0.385544	-0.324007	-0.119025	0.486589	-0.709861	-0.270088	-0.925077	-0.341051	-1.63333	0.798443	-1.11824	0.712038	-0.636478	-0.0344717	-1.30709	1.92789	-0.38431	-1.23256
b0254	perR PerR transcriptional regulator	0.903403	0.368074	-4.20148	-1.43214	-0.169213	LQ	0.866935	LQ	-1.5156	-1.10161	0.435491	0.684993	0.239573	-1.07319	-1.5209	-0.0391926	2.55596	1.64468	-0.165036	2.56734	-5.51743	2.0999	-2.14048	1.54963	-0.532955	1.00127	0.188458	-2.65068	-0.863627	-0.819778	4.42948	3.07744	2.00834	2.55113	1.00263	-0.853501	-2.90595	-0.0466235	2.87088	0.983061	1.78656	-4.02911	3.80514	-0.0987061
b0255	insN-1 CP4-6 prophage; partial regulator of insertion element IS911A	0.42536	0.71595	-0.323275	-0.509627	-0.573694	1.45049	-1.12121	0.0976828	1.60867	0.67936	0.408812	-0.0228494	0.881481	-0.235903	-0.425521	-0.716971	-0.708426	-0.604776	2.30862	0.824187	-0.67764	0.132162	1.14834	0.059283	0.336909	0.369322	0.233476	-0.377549	-0.213035	1.75437	-1.80089	-1.30641	-0.970422	1.22538	-0.605712	0.757229	-0.274547	0.643497	1.91364	2.60314	-0.424074	1.39494	0.0689642	0.860629
b0256	insI-1 transposase of IS30	1.63933	0.535605	-1.44646	-0.734392	-2.08151	-1.54178	-3.79862	-1.19569	-0.778585	-4.3074	-0.593614	-0.256556	-0.405054	-0.793056	-1.44583	-0.584762	-0.00914557	-0.726967	-0.988587	-0.147508	-0.437367	-0.612443	-0.64896	-0.277804	-1.48369	0.113506	-0.593383	-0.359859	0.244995	-2.29342	-0.640764	-1.34636	-0.134163	-0.76697	-1.75848	-0.824943	0.93834	-1.51076	-0.61208	-0.79282	-1.64364	-0.990515	1.1124	0.623302
b0257	insO-1 CP4-6 prophage; partial transposase of insertion element IS911A, interrupted by insertion of IS30 element	0.351191	1.17214	1.0101	-0.814209	LQ	0.277664	-1.08738	-0.82833	LQ	0.398828	0.564704	0.0843534	0.255504	0.560648	0.573984	0.431815	-0.889108	-0.70312	-0.45158	-1.06665	0.732575	-0.395221	0.541125	0.0404427	0.399017	0.399751	0.484841	LQ	1.21564	0.989581	-1.73445	-1.51918	LQ	-0.542897	LQ	-0.21183	0.900239	0.462407	0.59872	0.357349	1.61178	1.00855	-1.05408	-0.191573
b0258	ykfC CP4-6 prophage; conserved protein	-0.202841	0.482186	-1.23006	-2.43099	-0.14703	-0.598149	-3.83931	-0.83445	-2.34702	0.38335	-0.577184	-2.04981	-0.367927	0.126238	0.143918	-0.783481	-0.799908	-0.650985	0.411641	-1.9833	0.228748	-2.93729	-0.143759	1.68631	-0.081785	0.361021	0.492031	0.86619	-1.05662	-0.302079	0.187114	1.2381	-0.905616	1.07462	4.19809e-05	0.149272	1.00982	0.231428	0.0676136	-0.454901	-2.80547	-1.57633	0.422883	1.80349
b0259	insH-1 IS5 transposase and trans-activator	0.646446	0.449632	-0.62427	-1.36521	-1.39928	-1.05011	0.162183	-1.96235	-2.99129	-2.78093	-1.43642	-0.136153	-1.08116	1.63548	1.02647	-0.314166	1.79901	1.22301	0.62319	-0.0521852	1.11359	-0.389766	0.309997	0.121526	-1.60635	0.43487	0.645669	-0.947398	0.9351	-0.386253	-0.0236234	-0.434707	-0.916714	-0.583216	-0.991492	-0.366123	-0.059112	-0.351896	0.629909	-0.578119	0.494037	-0.431503	-0.373859	0.762958
b0260	mmuP MmuP APC transporter	-0.268996	0.982993	-0.437302	-0.236278	0.486197	0.575838	-1.04553	-1.94871	-0.108689	0.0963979	0.0630098	-0.36731	-0.247738	0.202412	0.411869	0.376239	-2.2529	-1.83541	-0.864399	-1.95211	-0.828226	1.06854	1.12565	-0.949885	-0.173357	-0.182853	0.115834	-0.811957	1.40506	-0.393819	-2.88662	-2.65353	-0.741887	0.922442	0.815995	0.173175	-1.54466	-0.200362	-0.23813	-0.0434581	-1.1259	-0.406817	-2.18602	-2.33552
b0261	mmuM homocysteine methyltransferase	-0.820033	0.598934	0.516655	2.91037	0.892506	1.00562	-2.46781	-0.990497	-1.16774	1.93133	2.00327	2.89476	1.52153	1.70313	2.01995	-1.94581	1.03406	1.49378	0.682894	2.96192	-0.634817	-2.58595	1.55554	3.10009	2.58657	1.06654	1.48781	-0.659008	2.52306	-0.0300719	-3.48988	-4.45446	1.20637	2.39708	1.7901	-0.202797	-1.20217	0.771263	2.76082	2.05264	5.54356	0.528845	0.101431	0.807222
b0262	afuC CP4-6 prophage; predicted ferric transporter subunit/ATP-binding component of ABC superfamily	-0.922919	1.0755	1.36601	0.355034	0.860184	0.419478	-1.6463	0.109307	1.02105	0.628142	0.705774	-0.0620653	0.906218	1.25537	1.37364	-0.0233792	-0.79736	-0.330308	0.0391407	1.62743	0.0204705	-0.502239	0.826906	-0.639743	0.813078	0.149259	0.343454	0.222832	-0.129246	-0.201636	-1.52023	-1.27938	0.153307	1.85527	0.423521	0.149359	0.226424	0.167776	-1.27897	-0.276462	-0.639206	-0.340235	-0.323873	2.02926
b0263	afuB AfuB	-0.740731	0.53735	0.90438	0.464055	-0.222238	0.835917	-1.30367	0.902467	0.90282	0.817558	1.55887	0.785806	1.30135	0.729499	1.30808	-0.275826	-0.758554	0.336808	0.300053	-1.02066	-0.341834	-0.291835	1.32392	1.05425	1.42972	0.142439	1.18364	-0.0333611	1.66248	0.286405	-0.866916	-0.038188	0.593124	0.696317	-0.566646	0.736986	-0.823887	1.31925	-0.651228	1.5616	-0.698486	0.368346	-0.622045	1.87155
b0264	insB-2 IS1 protein InsB	0.742246	0.582632	-1.706	-0.270183	-0.309917	-0.120221	-1.36436	0.519569	-1.97802	-0.720461	-0.11848	1.36986	0.0786897	1.26165	1.70888	-0.240732	1.18751	1.68238	-0.031908	2.00919	0.0827022	0.722516	0.627524	-0.0661858	0.678775	-0.0714518	0.598897	0.53268	-1.08261	-0.691318	1.26211	1.41291	-0.262401	0.0468976	0.484504	0.469306	2.07395	-1.40437	-0.10919	0.227705	0.794679	-0.259942	0.910752	-0.972133
b0265	insA-2 IS1 protein InsA	0.45044	0.569237	-1.32837	LQ	-1.04278	LQ	-1.20106	LQ	-0.731522	-1.38402	-0.65484	0.486228	-1.11312	0.173554	LQ	-1.03964	-1.23018	LQ	-0.896461	0.719679	-1.27199	-0.677677	0.410763	-0.666841	-0.900592	-0.368629	LQ	-0.756013	1.7953	0.652252	-2.21643	LQ	-0.912787	-1.27932	-0.136653	0.138108	0.480785	0.852184	-0.00962721	0.583187	-1.33507	0.427184	-0.475587	0.502631
b0266	yagB CP4-6 prophage; conserved protein	-0.331598	0.441374	2.10709	1.95125	0.734382	1.11845	-2.10116	0.399024	0.595274	0.266478	2.47823	0.470569	2.17006	1.66803	1.5187	1.893	2.81888	2.33998	2.4131	-1.77328	3.29764	0.842783	2.11344	1.45664	1.45462	2.07695	1.8563	0.519929	0.761119	2.4894	-2.89773	-1.66627	-0.0267724	2.05963	2.57931	0.382133	-1.00786	1.13709	2.4533	0.938439	-1.90103	2.09137	-0.48643	3.45509
b0267	yagA CP4-6 prophage; predicted DNA-binding transcriptional regulator	-1.19265	0.709412	0.403106	0.15131	0.352172	0.912125	-0.695779	1.0991	-0.502426	0.99633	1.08529	1.22512	0.999781	1.87486	1.91499	-0.143142	-0.201013	0.274581	0.246196	-0.0214901	-0.517954	0.254167	1.93604	0.659774	1.39328	0.291452	0.556796	0.44876	0.442944	1.41009	-0.49028	-0.396773	-0.993235	-0.633636	0.417948	0.302028	-1.66212	1.77676	0.880794	1.27917	-0.832972	0.325356	-0.158283	2.7162
b0268	yagE CP4-6 prophage; predicted lyase/synthase	-1.5502	0.710984	1.00708	-0.258027	0.439843	1.33697	-0.84618	0.500666	0.0416388	2.80565	1.28849	0.757178	1.66272	1.38618	1.44797	1.11429	0.449251	0.806681	-0.438053	-2.20427	1.38408	-1.03311	1.17373	-0.459786	0.684993	-0.71346	0.243449	0.235539	-0.175996	0.279297	-1.03698	-0.42462	-0.449616	0.960759	0.633247	0.141495	-2.41013	1.42705	-0.843181	0.294737	1.69316	2.51744	0.0800749	1.58824
b0273	argF ornithine carbamoyltransferase	-1.13938	0.797451	-0.42714	0.247858	0.111757	0.696734	2.22556	-0.132755	-0.278142	3.02466	0.968739	0.930446	0.759093	0.849002	1.10415	1.42678	-1.10493	-0.267191	1.69447	-0.11389	-1.34822	-0.193265	0.997496	-0.139189	1.07701	0.290216	0.441727	-0.185294	0.0508004	0.312272	0.252575	0.873502	-0.497752	1.26206	-0.287395	0.710876	-0.688856	1.51559	-0.428059	0.393206	0.426515	0.455134	-0.514016	-0.398569
b0274	insB-3 IS1 protein InsB	0.709823	0.579913	-1.7541	-0.348196	-0.37458	-0.127835	-1.49557	0.324701	-2.03258	-0.709302	-0.162382	1.39639	0.0300588	1.14908	1.45123	-0.309935	1.21419	1.55005	-0.0548999	1.99829	-0.0948059	0.67695	0.539491	-0.0562478	0.588599	-0.0627954	0.628897	0.43758	-0.853346	-0.558926	1.08011	1.23149	-0.507838	0.0274393	0.367968	0.393006	2.02484	-1.08695	-0.108155	0.298783	0.728674	-0.258764	0.878592	-0.972554
b0275	insA-3 IS1 protein InsA	0.395844	0.534257	-1.29687	LQ	-0.980847	LQ	-1.14234	LQ	-0.549675	LQ	-0.620523	0.581732	-1.08477	0.273569	LQ	-0.911107	-1.16127	LQ	-0.986785	0.712746	-1.05964	-0.746955	0.535371	LQ	-0.905443	-0.442953	LQ	-0.651447	2.00176	0.859557	-2.17649	LQ	-0.83964	-1.15484	0.0555374	0.391726	0.367946	1.07867	-0.0168181	0.519784	-1.77284	0.852156	-0.36607	0.828517
b0276	yagJ CP4-6 prophage; predicted protein	1.0217	0.48168	-2.23557	-1.97674	-0.208563	-0.371724	-4.73156	-1.89985	-1.88521	-2.23176	-0.659822	-0.82919	-0.151048	0.391477	0.335835	-2.47238	0.106553	0.346558	0.796683	0.084209	-1.10905	-0.788879	0.258321	1.27241	-0.314737	-0.216572	-0.450872	1.08141	1.00799	-2.37203	3.73373	3.34454	-0.606347	0.763085	1.48102	0.134564	-0.103138	-0.676532	0.775831	-0.378232	-1.81943	-1.39268	-0.879939	0.644345
b0277	yagK CP4-6 prophage; conserved protein	2.43917	0.443106	-1.45379	-1.17213	-1.75946	-2.30527	-0.728926	-0.0436265	-3.57518	-5.23967	0.460587	0.364952	-0.167886	-0.412308	-0.963016	0.140804	1.59764	0.88056	-0.995355	-1.03266	0.35026	0.962657	-1.11929	-0.808351	0.714963	-0.400415	-1.1768	-0.0293835	-0.691806	-0.708045	2.84175	2.01536	0.821296	0.0462388	0.176922	-0.29314	1.07094	-1.47101	0.51168	0.511653	0.0799788	0.259718	1.24053	2.03313
b0278	yagL CP4-6 prophage; DNA-binding protein	2.78667	0.814817	-2.31172	LQ	-1.02954	LQ	-2.18877	LQ	-1.44636	-2.90587	0.451594	-1.25002	0.746784	-0.171446	-0.95984	-0.722562	0.820748	0.151553	-1.06402	0.769777	-1.29811	0.940735	-0.683386	0.764626	-1.20173	-0.462249	-0.931958	1.23904	-0.0297905	-1.1996	1.83083	1.56322	-0.0299727	0.4646	0.345616	0.907366	0.594824	-1.7169	1.05278	-1.10833	1.5981	-1.42978	1.29399	0.209679
b0279	yagM CP4-6 prophage; predicted protein	1.99524	0.874897	-1.76044	-0.50992	-1.29641	-0.547311	-3.07226	0.489551	-0.536219	-1.94338	0.477733	-2.40378	0.330996	-0.354507	-0.501837	-0.0603912	1.29637	0.849001	-0.643055	1.36815	-0.322585	0.867371	-0.644797	1.20434	-1.20203	-0.308113	-0.485036	1.68554	-0.103224	-1.65156	2.39725	1.72674	0.220774	0.0626532	0.761956	1.19269	1.50262	-1.2546	1.29664	-0.737899	2.18812	-1.05423	1.62854	0.784914
b0280	yagN CP4-6 prophage; predicted protein	2.56882	1.03152	-1.71558	-0.901497	-0.996675	-2.34347	-3.64238	LQ	-1.13414	-3.08386	-0.983515	-0.326674	-1.50322	-1.38474	-1.51507	-1.28302	0.00487998	-0.473109	-0.294348	-0.798088	-3.53682	1.44007	-1.32615	0.14408	0.203329	-0.301725	-0.473653	-0.989776	-0.0900681	-1.6615	0.466702	0.0896277	-0.0199049	0.590644	-0.762047	0.094028	0.336836	-1.43123	0.698902	-0.128152	0.825263	-2.83732	0.22441	-0.565263
b0281	intF CP4-6 prophage; predicted phage integrase	1.27517	0.684623	-2.83714	-1.89754	-0.225465	-1.52664	-4.66783	LQ	-1.03696	-2.42764	0.523041	-0.579698	-0.965638	-1.55006	-1.80149	-0.925654	0.226683	0.215214	-1.56752	-2.83624	-0.935295	0.944388	-1.2878	-1.05311	-0.575971	-0.201029	-0.484792	0.578745	-0.667843	-1.02455	2.59668	2.31632	1.15742	1.10595	0.452617	0.318636	0.747855	-2.27087	-1.75126	-1.01599	0.314619	-2.1183	1.00042	-0.0683879
b0282	yagP predicted transcriptional regulator LYSR-type	-0.626086	0.471193	1.18466	0.000334945	-0.776323	0.0513726	-2.33812	-0.918879	-0.0978305	1.70305	-1.18485	0.115036	-1.54982	-0.260239	-0.104068	-1.20977	-2.5651	-2.05915	-0.597892	3.4191	-2.755	-1.79489	0.876852	-0.622076	-0.251727	0.617588	0.616726	-0.99119	-0.16678	0.104692	-1.90906	-0.754758	-0.150466	1.94654	-2.3397	1.12557	-2.61408	1.69261	0.412654	2.69017	-2.5632	1.25679	-0.371681	0.290354
b0283	yagQ conserved protein	-0.875722	0.643789	1.28885	1.86234	-0.284165	0.748047	-3.08126	-0.758404	-0.241117	0.610693	0.571554	4.08145	0.454369	0.592565	0.742489	-0.277871	-2.47003	-1.62531	2.60094	-2.209	-2.03384	-0.0482519	1.84807	0.352172	1.91953	-0.159806	0.348142	0.627666	-1.30264	1.92112	-1.76369	-1.06183	0.422455	-0.642701	-2.13888	-0.713558	-3.1971	1.04538	-1.58722	-0.95179	-3.14922	-0.494176	-0.579986	0.0814236
b0284	yagR putative molybdenum cofactor-binding oxidoreductase	-1.01718	0.603694	0.95771	0.0930537	-0.452442	1.22644	-1.40999	0.585947	-0.329403	1.28274	0.664218	1.41141	0.941373	1.32223	1.31914	0.0137636	0.681147	0.837327	0.812091	-1.34448	0.723454	-0.630313	1.68937	-1.27626	0.516823	0.625871	1.00127	-0.600578	1.00848	1.73507	1.30722	1.71212	-0.966624	0.113923	0.263921	0.274232	-0.538407	2.03769	-0.586692	0.790278	-1.72761	0.684942	-0.561703	-0.311332
b0285	yagS putative oxidoreductase, FAD-binding domain	-0.537892	0.680706	-0.293971	0.339345	0.0186388	0.196524	-2.11204	0.219816	-1.15745	1.92176	0.759295	0.0120722	0.37086	0.14856	0.621163	-0.768159	-0.823262	-0.261947	1.04083	-0.950826	-0.501145	-1.49904	1.21384	0.684233	0.759132	-0.201437	0.238464	-0.347229	0.320784	0.21157	0.0254627	0.721133	-0.995657	0.983152	-0.0369818	-0.291984	-1.24023	0.692907	1.75867	1.15448	-1.32226	-0.251845	-0.627313	0.46558
b0286	yagT putative oxidoreductase, Fe-S subunit	0.191602	0.447175	-0.737587	1.22592	0.473223	0.504982	0.294912	-0.246727	1.30063	0.0616191	0.311049	2.14525	0.726651	1.02779	1.55338	1.37069	0.776932	1.07392	1.66217	2.41125	-0.425153	0.283693	1.16716	1.29563	0.490158	1.46161	1.77511	0.771834	0.865301	-0.214696	-2.8743	-1.18557	0.78378	-0.627031	1.93528	1.02195	-1.45837	0.0212145	2.41726	0.371137	1.08633	1.68345	1.50011	1.2366
b0287	yagU conserved inner membrane protein	2.73355	0.574458	-2.73398	-1.36751	-0.873082	0.23278	-1.40375	0.791355	2.81857	-0.174114	0.317853	0.422964	0.807451	0.304695	0.278706	0.417983	0.817256	0.501637	-0.597563	0.0733794	0.197185	0.985893	1.09777	0.893294	1.05254	0.00489548	-0.612296	1.60563	0.947482	-0.79388	2.54631	2.37264	-0.296564	0.393299	0.159214	1.05314	1.57473	0.0517675	0.755457	1.06196	1.93735	1.32775	0.773164	1.52656
b0288	ykgJ predicted ferredoxin	1.96971	0.622797	-3.74175	0.433394	-0.108803	-0.887768	-4.33429	0.0643106	-0.613664	0.340341	0.502345	-1.90254	1.01439	-0.561466	-0.924594	-1.71566	1.03584	0.938716	1.14252	-0.164806	-1.02527	0.694055	0.051939	0.187916	-1.5967	-0.640493	-0.521384	1.00629	0.406806	-2.38865	1.33939	LQ	0.486428	-1.13999	-0.393738	-0.0473549	0.291613	-1.50564	-0.577331	-0.277677	0.232338	2.53019	-0.443909	1.28643
b0289	yagV conserved protein	0.353899	0.635656	-1.77498	0.815897	-0.525138	0.207844	-3.51238	-0.615736	-1.57084	-0.0490817	0.235121	0.185318	0.0836397	-0.104814	0.187688	-0.746563	0.740594	1.25211	-0.0454591	0.558049	-1.42144	-0.548502	0.546053	1.57063	0.577566	-0.153376	0.125814	-0.0190522	0.843489	-1.31706	0.861177	1.36185	-0.403514	-0.401837	-0.755893	1.20563	0.854529	-0.966568	0.139831	-2.11744	2.04689	-1.41299	-0.665507	0.751802
b0290	yagW predicted receptor	-0.225512	0.590675	-1.24031	0.0780625	-0.382453	-0.168159	-0.681601	1.85641	-1.1367	0.401412	0.56373	-0.613641	0.474401	0.428063	0.646303	1.90468	-0.844851	-0.591858	-0.224095	3.55594	2.7906	1.14904	0.690668	1.55725	1.26967	0.725348	1.48451	3.70023	3.73059	2.74919	2.92156	4.98589	-0.751	-1.46385	-0.452325	0.584003	-2.19884	0.274122	-2.25437	0.657758	5.59189	0.876103	-0.159987	4.6521
b0291	yagX predicted aromatic compound dioxygenase	-0.184519	0.799838	-0.858041	-0.209211	-0.647698	-0.303698	-3.54012	-0.711093	-0.752456	-0.0308062	0.338893	-1.09925	-0.112979	-0.188613	-0.113041	-0.676411	0.00142656	0.0720227	-1.66205	-0.208	0.426765	-0.499954	0.33787	-0.560116	-0.105616	0.110753	0.302352	-0.276162	-0.761235	-0.638161	-0.623606	-0.356495	-0.658915	0.301426	-1.33165	-0.0885752	-1.08643	0.734915	0.753406	-0.10755	-0.500008	-1.13198	-0.31853	0.238386
b0292	matC predicted protein	-0.0663269	0.943631	0.776939	-0.126715	0.338311	0.525743	-1.89713	-0.15179	-1.3487	-0.678194	-0.217919	-0.0383343	0.230185	0.135654	0.249646	0.0135843	-0.0870114	0.0329422	-0.293746	1.02569	-1.47834	0.0637646	1.29928	-1.15801	0.87197	-0.250421	-0.0162581	-0.203157	0.773027	1.46246	-1.66603	-1.12935	0.0528707	-0.0278891	0.723522	0.0946044	-1.86481	0.917941	-1.40953	-0.890563	-0.880742	-0.496601	-1.48173	-0.665726
b0293	matB conserved fimbrillin	0.563559	0.619978	-1.30196	-2.25288	-0.657034	-0.00175506	-2.46149	0.236876	-2.67297	-2.5799	0.180402	-0.921776	-0.149024	0.519787	0.293993	0.642959	0.101508	-0.057157	-1.39049	3.02556	-1.64896	-1.61168	-0.460261	-0.613696	-0.226736	0.517156	0.249501	-0.718834	-0.925188	0.213918	-2.45274	-1.51411	-0.945385	0.280777	0.0191196	-0.722163	-2.61899	0.408355	-0.695247	-0.470854	0.868155	-0.538327	-2.39073	0.384855
b0294	matA predicted regulator	2.21089	0.496223	-3.33911	LQ	-1.78598	LQ	-4.33829	LQ	-2.76116	-4.07598	0.572507	-3.73374	0.608838	-0.202544	-0.462089	-1.12682	-0.527238	LQ	-0.133822	0.1612	0.0696003	-0.512187	-0.110772	-1.49826	-1.6946	0.139962	-1.10886	0.766397	-0.711649	-1.97505	2.77955	LQ	0.117587	-0.918932	-0.794125	-0.177277	-0.912667	-2.31448	-0.97422	-0.109494	-0.637352	-1.33975	2.068	0.788134
b0295	ykgL predicted protein	1.69449	0.524557	-2.36921	-4.20149	-3.17811	-3.19716	-4.58204	-0.773577	-3.18065	-5.98397	-3.3935	1.72931	-1.62033	-0.314356	-1.10171	-2.852	-0.95174	-2.11318	-0.408791	1.40905	-2.30994	1.98442	-1.90791	0.93446	-1.70883	1.45646	0.950731	-2.24134	2.23451	1.14655	3.15166	1.81721	-2.72345	0.562581	-2.098	-0.171745	2.32121	-3.67639	2.30489	-3.02395	3.18022	-3.90746	2.09688	-2.23568
b0296	ykgM predicted ribosomal protein	0.399284	0.393097	-2.48814	-0.933708	-1.26835	-1.02647	-2.27408	LQ	-1.75071	-0.787814	-0.320071	-0.780475	1.73497	-0.20985	-0.485438	-0.516646	1.08231	0.181635	-0.73863	-2.69942	3.29932	0.599134	-0.495379	0.436116	-0.221109	-0.058658	0.411654	0.709759	-0.245741	-0.169771	1.98115	LQ	-0.34243	-0.568358	0.358465	-0.516302	-2.18098	-0.553339	-0.742599	-0.776575	-2.15321	-1.12815	1.66579	-0.98552
b0297	eaeH	2.11441	0.38833	-0.577268	-1.80998	-2.07581	-0.353942	-1.28624	-1.63566	-3.10098	-6.12501	0.408568	-0.569143	0.330356	-0.109472	0.0893993	0.672245	0.166955	0.296358	-0.884943	-0.173244	0.258875	1.11265	0.859405	0.460467	-0.342523	0.0993	0.544348	-0.562737	-2.79332	1.00452	-4.82273	-4.56589	0.232969	-0.21658	-0.714628	0.352498	2.07349	0.18314	0.115055	0.0885489	1.49634	2.32094	-3.8253	2.39109
b0298	insE-1 IS3 element protein InsE	1.10033	0.375296	-1.90869	-3.23614	-2.25031	-2.49982	-2.06867	-2.08772	-4.01816	-3.53991	-1.61363	0.468899	-1.40633	-1.23288	-2.07942	-2.12049	1.87914	0.56125	1.73965	1.92683	-1.89807	0.283805	-1.77724	0.334539	-1.52856	-0.00960535	-0.839157	-1.81315	-1.15465	-1.98338	-6.41155	-5.09674	0.845467	-0.694279	-1.59069	-0.318405	0.958787	-0.0625368	0.318996	0.349706	-5.27193	-3.07172	-1.80827	-0.314413
b0299	insF-1 IS3 element protein InsF	0.563673	0.430332	0.365754	-0.00514531	-1.12544	-0.0688576	-0.649834	0.384954	-4.01097	-3.38053	0.567919	0.248181	0.868594	0.28277	0.424471	0.428437	1.61469	1.38884	1.21747	2.24183	-0.180176	-0.0144147	0.439273	-0.549917	0.67058	0.55085	1.21359	-0.470222	0.121202	0.210742	-0.423465	0.33427	-0.658102	0.73746	-0.12122	0.0834554	0.331862	0.113788	-0.810995	0.356911	0.0119705	2.36327	-0.188654	1.26046
b0300	ykgA predicted DNA-binding transcriptional regulator	3.2254	0.602132	-3.41798	LQ	-1.69448	-0.775181	-1.52076	LQ	-3.16342	-2.55485	-0.832044	-2.92264	-0.0693702	-0.57147	-0.720591	-2.17371	-0.214899	-0.626571	-1.9885	1.19805	-1.42505	0.931187	-0.92658	0.338475	-0.87447	-0.894541	-1.02838	1.0257	-0.100941	-1.87173	2.17552	2.51112	-1.33609	0.210936	-0.58671	0.811477	0.367342	-2.99926	0.938181	-1.35392	0.248992	-1.63272	1.19727	0.60197
b0301	ykgB conserved inner membrane protein	2.61652	0.464503	-2.64681	-1.55577	-2.79547	-0.901126	-2.26287	-0.0980309	-3.97098	-6.09139	-0.456961	0.211223	-0.64668	-0.453978	-1.12294	-0.669666	0.250163	0.00201408	-0.0631977	-1.30267	-0.564461	0.598065	-0.665583	0.151617	-0.468813	0.449311	0.11387	-0.113022	0.0531296	-1.44666	2.42351	1.43946	-0.571019	-1.08254	-0.868778	0.504294	0.845738	-1.30682	0.870802	-0.322606	2.1493	0.464588	1.65098	0.621258
b0302	b0302	0.262548	0.298206	0.778753	-0.76342	4.18236	-0.199717	1.30693	LQ	5.85268	-0.650441	7.65606	1.62465	7.15517	0.0199276	0.0258376	6.489	-0.031671	LQ	0.991447	-0.361023	3.10903	0.817309	0.641453	0.453783	0.935295	-0.32392	0.056306	10.0283	1.79939	1.6208	-0.266283	-0.0718888	6.86075	0.136153	8.60272	0.528559	0.350919	2.41326	-0.194886	1.26098	0.73451	2.84619	1.42647	9.40439
b0304	ykgC predicted oxidoreductase with FAD/NAD(P)-binding domain and dimerization domain	4.09698	0.660915	-2.89926	-1.16396	-2.93409	LQ	-1.39417	LQ	-2.9248	-5.25922	-2.40391	-1.61703	-2.07286	-0.475728	-0.262295	-1.94463	0.257983	0.114258	-0.65647	-0.406086	-2.05117	1.03155	-0.00864994	0.869323	-0.698829	-0.0507891	-0.106174	-1.20033	0.626145	-1.6826	2.32018	2.41733	-2.08619	0.00692121	-2.45177	0.772798	1.66775	-1.83339	1.0487	-0.272336	0.765665	-1.31852	1.19634	-0.87084
b0305	ykgD predicted DNA-binding transcriptional regulator	2.43528	0.702934	-1.77862	-1.28075	-1.27887	0.689247	-2.74331	-0.111899	-4.83846	-4.02784	0.0813819	-1.90312	0.0953949	0.219374	0.283945	-0.290461	0.233257	0.586222	-0.453795	1.01841	-1.18142	-1.15406	0.188399	0.571831	-0.241646	0.0111318	0.553139	0.80943	-1.60247	-0.807439	0.933676	1.44958	0.016932	-0.676667	-1.13426	0.641893	2.02359	-0.0188775	0.496538	-1.76373	1.95126	1.70756	0.504935	1.01923
b0306	ykgE predicted oxidoreductase	1.42642	0.695154	0.261522	-1.43352	-0.829982	-0.494599	0.367141	0.52928	-2.70502	-2.27768	-0.193274	-1.48311	0.907953	-0.05624	-0.107836	0.635146	-0.386552	-0.424371	0.961926	1.21997	-0.148433	0.530505	0.484086	-0.724486	-0.483621	1.23028	1.06583	0.629649	0.731102	1.52575	-0.378759	-0.192391	-0.0546746	-0.294149	0.44992	0.666517	1.50279	1.70563	-0.356935	0.140826	-1.23643	0.784601	-0.411732	0.0239383
b0307	ykgF predicted amino acid dehydrogenase with NAD(P)-binding domain and ferridoxin-like domain	0.864978	0.799956	-0.433959	-0.637346	-0.495695	0.104247	0.876265	-0.489908	-0.913338	-1.64973	0.0205442	1.25678	-0.150976	-0.0407165	0.0466741	-0.171216	-0.468984	-0.306375	-0.177077	1.51257	-1.12467	0.345627	0.543094	0.521947	1.13375	0.0113134	0.0584046	0.649814	1.39231	0.398363	0.416065	0.99172	-0.0873199	-0.508233	0.56918	0.486951	-0.857623	-0.00594063	0.596865	1.11352	-0.392444	-0.430203	0.0332265	0.573496
b0308	ykgG predicted transporter	0.553599	0.688567	-0.207205	0.0845753	-0.418983	-0.18094	-1.42428	-0.941913	-1.48277	-1.42291	0.280212	1.00054	0.247517	0.821954	0.562931	0.446519	-1.07693	-0.620648	0.36647	1.01866	-1.29491	0.720607	0.528715	1.16522	0.142782	-0.217673	-0.109874	-0.0312097	-1.09063	0.313279	-1.12237	-0.662724	0.387131	0.143118	0.551403	0.162368	2.39019	-0.0382604	-1.71881	-0.357297	-1.92789	0.73016	-0.841262	1.03155
b0309	b0309	0.957336	0.431654	0.273736	LQ	-0.484996	-1.05888	0.0245175	LQ	-1.4594	-1.98445	2.29019	-0.925255	5.18396	-0.765698	0.0343263	1.02963	-0.859228	-0.370875	1.01167	0.159433	1.48554	LQ	-0.373369	0.0532868	-0.22856	-0.305706	0.64382	-0.631402	1.09916	0.862951	-1.52931	LQ	-0.591305	-1.67424	-1.58381	LQ	0.672965	0.697853	0.196784	-0.313921	0.64771	2.69806	0.739564	3.33644
b0310	ykgH predicted inner membrane protein	1.75858	0.386858	-7.1275	1.44742	1.82968	-0.0628409	-8.53965	1.36339	-3.60914	-6.3879	-0.16252	-5.85833	5.47345	2.36173	1.38279	-1.86694	4.1441	2.06724	-1.12801	0.0451193	-6.08313	2.45716	-1.55847	0.524592	-2.95643	0.28685	-0.989581	3.38657	-2.29112	-3.65852	6.80215	5.34427	0.771701	0.38234	2.50684	2.7029	2.76302	-4.54451	3.13987	-2.09295	2.74822	-3.58104	3.7351	-0.623181
b0311	betA choline dehydrogenase	-0.725051	0.652949	-1.97855	-1.05007	-1.17997	0.547217	-2.31281	0.353558	-2.99411	1.44013	0.612857	-1.63188	-0.117631	1.0983	1.60361	0.600396	-0.929965	0.053388	0.879225	-2.30658	0.644527	-1.20266	0.65214	-0.705264	-0.81096	-0.701839	-0.104957	0.340418	-0.455168	0.140727	-1.47198	-0.297466	0.0383298	1.02419	-1.46933	0.389206	-2.05306	0.438058	-1.36829	-1.07424	-0.658411	1.03717	-1.05718	1.01065
b0312	betB betaine aldehyde dehydrogenase	-1.1305	0.864031	0.441756	0.847558	0.483404	0.990866	1.37373	0.570518	-1.32317	-0.144515	0.486588	0.494784	0.61017	1.07505	1.25409	0.970547	-1.17038	-0.785484	-0.124077	0.346494	-1.79766	-0.468274	0.850457	-0.39709	0.299564	0.232511	0.179407	0.47899	0.769809	1.05009	-1.43822	-1.77914	-0.528078	0.701486	-0.572264	0.608516	-0.637669	0.806907	-0.94292	0.275088	0.517945	0.895247	-0.356954	1.36331
b0313	betI BetI transcriptional repressor	-1.42089	0.971935	-0.316265	-0.64057	0.797029	0.534986	-0.471595	-0.0845602	-0.439439	-0.366807	1.24536	1.28876	0.91685	1.11899	0.890197	0.335951	-0.643231	-0.342269	0.829707	2.48741	-0.722509	0.876961	0.543284	0.272294	1.43494	0.624509	0.662908	0.510207	0.322213	0.412983	0.435719	-0.00346114	0.275563	2.06181	1.45666	0.0512804	2.26412	0.826325	3.26219	0.529457	-0.880648	-0.591934	0.798395	0.239666
b0314	betT BetT choline BCCT transporter	-0.442044	0.572168	0.0869846	-0.526954	-0.788396	0.791714	-0.831487	1.12633	-0.450984	0.654034	0.813475	0.961271	0.335144	0.523636	0.630105	-0.883822	0.388498	LQ	1.50366	1.06481	0.232706	-0.514241	1.47546	0.34523	1.31042	-0.0106146	0.0331275	0.228179	1.94347	1.27128	-1.49961	LQ	-0.112604	0.40534	-0.984534	0.773252	0.0830248	1.85755	-0.344797	1.26831	1.19791	0.403678	-0.260965	0.870461
b0315	yahA phosphodiesterase, c-di-GMP-specific	2.62356	0.394998	0.732117	-2.85491	-1.80073	-1.25166	-4.51624	-1.74486	-1.25836	-5.41866	0.292327	-0.458875	0.442897	-0.496654	-1.10313	0.828412	0.271046	-0.60747	-0.242049	1.4315	1.90617	0.390143	-0.60559	-0.213546	-0.762382	0.12305	0.0983992	1.39444	1.75509	1.0592	1.85847	1.36596	-0.134675	-0.898477	-1.02862	0.0817347	1.19381	0.150842	1.16942	-1.41914	1.17296	1.46228	1.49989	2.80532
b0316	yahB predicted DNA-binding transcriptional regulator LYSR-type	1.4153	0.754474	0.8872	0.251775	LQ	-0.432522	-2.64491	-0.703778	LQ	-1.19836	-0.0398389	-0.0339067	0.785613	0.398276	0.652771	1.15278	0.438624	0.786436	1.61449	1.5248	0.791921	0.425384	0.398899	0.545336	-0.0956017	0.129443	0.346843	LQ	1.06432	2.15111	0.457981	1.18703	LQ	0.700569	LQ	0.0579416	1.44517	0.694903	-0.692024	0.0943279	3.50029	0.234336	-0.956109	2.91705
b0317	yahC predicted inner membrane protein	1.72252	0.476976	-0.842507	-2.96851	-1.21692	-1.06842	-5.53925	-1.20245	-2.96701	-3.9454	-2.20278	1.65052	-0.352273	-1.48851	-1.70904	0.115095	-0.0690871	-0.3285	0.131089	1.68458	-1.25839	-1.241	-0.191694	-0.474759	-1.3214	0.171722	-0.195338	0.133999	0.60897	-0.946668	-7.97681	-6.65162	-1.19312	-0.698525	-0.84144	-0.300297	0.470859	0.592013	1.72939	-2.81976	-1.14296	0.296435	0.400206	-0.936768
b0318	yahD predicted transcriptional regulator with ankyrin domain	2.54767	0.403375	-0.412747	-2.88205	-2.48371	-1.85246	-1.60705	1.40428	-3.73276	-6.09419	-2.13983	1.84847	0.111173	-0.337106	0.216203	-0.613504	-4.06596	-4.26036	-4.22638	-0.797439	1.01992	-1.32072	0.0861311	-1.09746	0.165442	0.193718	0.130134	-1.30124	-1.37104	0.820124	-6.80284	-5.8451	-0.540278	-0.0860571	-0.685074	-1.47982	0.177757	-1.43507	-2.57253	-0.685765	-7.54384	-0.687148	-0.5529	-1.94634
b0319	yahE predicted protein	2.75587	0.29203	0.320484	-1.83065	-0.570817	-2.28629	0.948702	1.05987	-5.39381	-5.98953	0.324574	-0.645196	1.04368	0.42603	0.836087	2.22441	0.589021	0.0358688	0.656903	-1.95719	2.36276	0.126423	0.316642	-0.532909	-1.05217	-0.941483	-1.11288	0.652404	0.0420053	1.02404	-0.771715	-0.85771	-0.0152305	-0.309285	0.265747	0.0949772	0.748885	0.279299	-0.506038	-2.68681	0.490221	0.0802032	0.0731981	1.83133
b0320	yahF predicted acyl-CoA synthetase with NAD(P)-binding domain and succinyl-CoA synthetase domain	-0.0568983	0.760329	0.200477	-0.513321	0.0696459	0.135992	-1.37412	0.667859	-1.33595	-0.652547	0.166059	0.787026	0.538312	0.847502	1.00554	0.409361	-0.15072	0.366368	0.5598	-1.05326	-2.46841	-0.263372	0.575594	0.371034	0.406657	-0.426062	0.0463449	0.0290182	-0.129167	-0.197916	-0.151125	0.111195	0.000960802	1.12283	-1.59339	0.171502	-0.325876	0.860084	0.650532	0.864206	-1.16237	0.785715	-1.12905	-0.275148
b0321	yahG conserved protein	-0.69081	0.44864	3.82497	4.42068	1.96434	2.50143	-1.10492	-0.826078	-2.6589	1.63671	0.460017	0.967937	0.229694	0.823835	1.21945	0.284911	-1.80958	-0.629461	2.00176	1.00666	1.19487	-2.02395	0.97734	-0.277104	0.560799	-0.0978486	0.106952	-0.27272	-0.473241	0.545044	-2.95322	-2.20551	-2.22192	-0.258271	-4.82831	-1.45814	-2.5103	0.9657	-2.1022	1.13631	-1.5399	2.02352	-0.930848	0.380821
b0326	yahL predicted protein	2.50928	0.471473	-2.18254	-1.52357	-2.04888	-1.3895	0.261931	0.376627	-2.42811	-6.83143	0.743841	-0.0560992	0.29967	-0.635899	-1.45376	-0.153838	1.01067	0.254446	-1.19535	-0.883957	-1.00395	0.921215	-0.636857	1.29062	-0.0226182	-0.0483328	-0.707864	0.91534	-1.26871	-1.5508	1.51261	1.04999	0.290074	-1.24087	-1.58382	0.124195	0.714476	-1.10699	0.19735	-1.60371	2.39054	-1.5581	0.348939	-0.677364
b0327	yahM predicted protein	1.97785	0.48136	-6.07908	-2.773	-1.37034	-2.7789	-0.660383	LQ	-4.56999	-5.02522	0.113815	-0.243945	-1.92926	-0.549687	-0.580327	0.724364	-0.769599	-0.985505	-4.3544	-0.634435	0.769399	0.228011	-3.15716	-1.82899	-1.22965	0.438031	0.340771	-1.35548	-0.324378	-0.435947	0.0657326	-0.266358	1.25007	-0.167593	1.38628	-1.69148	-0.141557	-0.981202	-1.82185	-2.33227	2.47272	-6.11373	1.07584	-4.33631
b0328	yahN predicted neutral amino acid efflux system	2.09738	0.627656	-3.12274	-0.740591	-1.27361	-0.973354	-4.01367	-0.962954	-3.30887	-5.53842	-0.535666	-1.43883	-0.976188	-0.943137	-0.899608	-0.361083	-0.642315	-0.687946	-0.476296	2.15478	0.456408	-0.0819601	-0.268324	0.150699	0.0382859	0.218466	0.600703	-0.547042	-2.89849	-0.708531	-1.6149	-1.42688	0.298671	-0.529768	0.479243	-0.920103	-0.659129	-0.625408	0.904793	0.129471	-3.06786	-2.54057	0.866606	-0.253254
b0329	yahO predicted protein	0.959366	0.438661	-0.645635	-2.2219	-0.652823	-1.29063	-3.4755	-1.98809	2.79777	-1.85541	2.16401	-1.61148	3.0975	0.504211	-0.569143	1.73289	3.30992	2.00903	-0.568373	1.88377	2.13305	-0.0886315	-0.245231	0.459385	0.217041	1.19446	0.113202	0.669814	1.62706	0.0394994	0.702893	0.284304	2.07769	-0.17605	-0.00792034	-0.534784	-0.866111	-0.367775	1.54688	0.551614	0.387296	-0.738224	2.67731	4.05639
b0330	prpR PrpR transcriptional dual regulator	-0.987239	0.913875	0.834606	-0.404463	0.362681	0.0754445	-2.04413	0.286335	-0.0995305	-0.203184	0.152561	0.977139	0.238536	0.019812	-0.0473254	-0.374872	0.205562	0.615853	1.3167	-0.784348	-0.354184	-0.581821	0.865865	1.12787	1.02095	0.347113	0.615963	-0.573779	1.59287	-0.61884	-1.28763	-0.694373	-0.216168	1.39358	-0.266434	0.464947	-1.0378	0.670091	0.66541	0.7019	-0.849043	0.340096	-1.02309	0.530401
b0331	prpB 2-methylisocitrate lyase	-0.93415	0.875312	-0.786561	0.427912	0.555265	-0.235446	-1.23652	-0.289536	-0.603028	0.388981	0.50403	0.372179	0.398152	0.197664	0.548469	-0.496471	0.833841	0.959589	1.10378	-2.57028	0.649535	-0.899348	0.23223	-0.788651	0.491124	-0.502992	-0.0146971	0.57494	-0.525438	1.20621	-2.80834	-2.53435	-0.831962	1.91233	-0.288898	0.710257	-2.92587	-0.816523	-1.75879	0.226615	-0.943458	0.617531	-1.13314	-0.836669
b0333	prpC methylcitrate synthase	-0.741252	0.911052	1.39655	-1.09873	-0.138797	0.375279	2.75779	0.104997	-0.446576	0.0689895	0.0808936	0.993311	-0.0442755	-0.711396	-0.561964	0.076319	-0.850063	-0.570592	0.302278	1.29685	0.679889	-0.0218906	0.513287	-1.17514	0.295845	-0.277118	-0.224778	-0.0501108	0.610578	0.658919	-1.04932	-1.27843	-1.24966	-2.03285	0.04521	-0.235647	-0.508156	-0.0386685	-0.422563	0.428722	0.498538	0.14071	-2.19121	0.905645
b0334	prpD 2-methylcitrate dehydratase	-1.12109	0.781466	0.110471	-0.0511663	-0.2143	-0.0054893	1.89172	-0.515821	-0.323299	1.73187	0.93613	-0.279359	0.293923	-0.216798	0.140663	0.208955	1.63549	1.89952	2.35052	-0.134577	-2.33865	-0.979792	0.956459	0.460227	1.47591	-0.0209781	0.319125	-0.016297	0.162038	2.23735	-2.12946	-1.64496	0.371527	-0.757903	-2.36943	0.8961	0.416301	0.718147	1.00151	0.141885	3.56542	1.17287	-1.31011	1.46879
b0335	prpE putative propionyl-CoA synthetase	-1.00052	0.594088	0.178957	-1.04138	-0.645291	0.442362	-1.80626	0.409516	-2.60998	1.30514	0.233457	0.0261857	-0.547351	0.824473	1.11493	0.575501	-1.76557	-0.892626	1.93478	-0.789613	-1.50501	-1.13376	0.777513	-0.387908	0.675459	-0.397016	-0.178247	-0.0837327	0.449164	0.363113	-2.70927	-2.60728	-0.617108	-0.502083	-1.01764	0.463094	-2.70505	1.03336	0.328793	1.09473	1.31114	1.52335	-1.41173	0.479079
b0336	codB CodB cytosine NCS1 transporter	-0.718296	0.988758	-1.73624	-0.75463	-0.373006	0.931325	-2.52801	0.14444	-0.775117	-0.0517404	0.195738	-0.696612	-0.355118	0.46289	0.43726	0.359823	0.156193	0.299446	-0.532464	-0.357796	-1.211	-0.075439	0.806265	1.52052	0.301531	-0.201328	-0.258292	-0.377622	0.0873873	0.0345662	-1.96699	-2.98158	-0.988601	-1.78346	-2.65004	0.813078	-1.91134	1.41151	-0.126577	0.45916	-2.0224	-0.532422	-0.506091	0.416418
b0337	codA cytosine deaminase	-0.646615	0.898961	-0.608907	-0.734558	0.641112	0.0617152	-1.59609	0.0960028	-0.35922	-0.220909	1.07892	1.70855	-0.461267	0.106184	0.172227	0.352662	-0.287821	-0.2368	-0.947546	-1.73076	-1.2302	-0.238467	0.711372	1.18311	0.564698	-0.586453	-0.666884	0.0826931	0.721687	-0.67749	-2.17646	-2.48127	0.235283	-0.948103	0.734825	-0.588318	-2.5296	-0.368296	-0.484856	0.609006	-0.345738	-0.835139	-0.975458	-1.08556
b0338	cynR CynR transcriptional dual regulator	-0.160152	0.748105	0.214933	-0.229878	-0.126691	-0.674776	-0.361982	-0.513025	-0.506079	0.039748	0.561418	-0.456409	0.276473	0.179394	-0.00360695	0.179587	1.14148	0.742899	0.128915	-1.30494	-0.507369	LQ	0.271938	-0.714516	0.253091	-0.472104	-0.14343	-0.234455	0.987432	0.745707	-1.93973	-1.74666	-0.237645	-1.76598	0.195739	-0.227336	-2.15727	-0.225152	LQ	-0.123606	1.72651	0.0258755	-2.11712	1.21877
b0339	cynT carbonic anhydrase monomer	-0.299513	1.16053	-0.0286225	-0.516154	0.218092	0.0487636	-1.93321	-0.362305	-1.27399	0.62806	0.350735	0.841081	-0.47245	0.0325086	0.0730678	0.648119	-1.39221	-1.01989	-0.769257	-1.0622	-1.71652	-1.13178	-0.520008	-0.47476	0.676186	-0.409425	-0.323444	-0.337084	-0.948491	0.896403	-2.18043	-2.03705	0.407581	-0.643365	0.855983	-0.00307114	-1.68285	0.43267	-1.5875	-0.649411	0.729806	0.169086	-1.81647	-1.04355
b0340	cynS cyanase monomer	-0.507929	0.495369	1.64263	0.671976	0.438078	0.0547752	-1.93483	-0.730879	0.930073	0.438531	-0.0360542	-0.00531434	-1.28608	0.405856	0.476692	-0.385186	-2.03568	-1.60457	-0.0531802	-1.37008	-1.96322	-1.54037	0.59084	-0.261329	0.40714	0.223239	0.43464	0.898474	0.199107	1.00912	-3.17741	-2.84032	0.0911719	-1.14831	1.24938	-1.48103	-3.43115	2.20816	0.360836	-0.636848	3.37951	2.82598	-2.12468	1.73751
b0341	cynX CynX cyanate MFS transporter	-0.375096	1.13109	0.360504	1.11448	-0.0946962	0.592985	0.373198	-0.748464	-1.62667	-0.353122	0.585519	0.663872	0.175543	0.472505	0.549827	-0.154023	-0.513092	-0.26139	1.20445	1.41557	0.81338	0.277606	1.02603	-0.315998	0.41852	-0.247885	-0.0936994	2.27823	0.929309	0.655679	0.422556	0.656363	-1.00797	0.907378	0.40095	0.37176	-0.560161	1.09705	-0.615732	0.442794	2.67262	-0.420962	-1.36016	2.56922
b0343	lacY LacY lactose MFS transporter	2.52025	0.475014	-0.0929824	-1.53275	-1.114	-0.285784	-0.895761	-0.258354	-2.56646	-3.76182	-0.556623	-0.538474	0.0306855	-1.19507	-0.727788	-0.616615	1.35799	1.66626	0.139271	-3.30189	0.442347	-0.183516	-0.166723	-0.143881	0.54173	0.211803	0.825967	-0.0628428	0.452979	0.314827	-0.339529	0.41549	0.280459	0.551386	-0.307331	0.451054	0.763893	-0.0338439	0.481638	1.02664	-0.294775	-1.77116	-2.71775	-0.0191646
b0344	lacZ beta;-galactosidase monomer	-2.94557	0.433779	1.08266	0.835633	0.345696	LQ	1.87913	LQ	2.12558	LQ	3.13522	1.75575	2.14796	1.09435	1.89843	1.25597	1.5855	3.10956	1.72968	-2.06151	1.24249	-0.209033	2.21398	-0.731591	1.92778	0.912619	2.28743	0.0881985	2.55367	2.84313	0.336636	LQ	0.154849	-0.0765771	0.0579541	0.222991	-0.732421	2.98428	-0.711908	2.20418	-1.28687	1.51734	0.283152	1.98648
b0346	mhpR MhpR transcriptional activator	-0.659065	1.35103	0.181591	0.751828	0.470557	-0.250907	-1.099	-1.18422	-0.527491	0.908857	0.6469	0.449994	0.497493	0.443437	0.501618	-0.267162	0.331898	0.376042	-0.127944	-1.75339	0.107064	0.667552	0.935668	0.788523	0.761996	1.00852	1.14142	-0.472613	0.607696	0.309411	1.733	2.16094	0.504641	0.845442	0.829322	-0.604589	0.326942	0.272354	1.2896	1.12237	-1.53397	-0.287454	0.223555	0.118365
b0347	mhpA 3-(3-hydroxyphenyl)propionate 2-hydroxylase	-0.553934	0.658771	0.769912	0.314807	-0.0962351	-0.901476	-3.91816	-1.72519	-2.18497	-0.278247	0.173802	-1.85079	-0.849015	-0.342317	-0.0876541	-1.68072	-0.915647	-0.654361	-2.00627	0.146029	-2.03097	-2.55362	0.348279	0.525416	0.735698	-0.864734	-0.468756	-0.811541	1.47245	-0.695769	-3.56103	-2.67163	-1.18451	1.35586	0.807894	-1.46527	-2.60105	1.066	-0.486471	0.244083	-3.91323	-2.31932	-2.02207	1.36321
b0348	mhpB 3-(2,3-dihydroxyphenyl)propionate dioxygenase	-1.67678	1.04163	2.29563	1.37535	0.907876	1.44337	1.12877	LQ	1.03511	1.44207	1.4871	1.70725	0.894522	0.443118	0.449569	1.47834	-1.0395	-0.864621	-0.0109635	1.90827	2.78743	-0.839729	0.768475	-1.0404	2.05511	1.58988	1.79916	0.830672	0.491375	2.04256	-0.453826	-0.32442	0.290976	0.640712	0.2687	1.72994	-1.25289	1.42972	0.391185	-0.154881	0.6754	1.22873	1.53353	2.37324
b0350	mhpD 2-keto-4-pentenoate hydratase	-0.826419	0.749886	1.50435	-2.4061	1.17755	0.657904	1.05598	-3.63611	1.91577	1.93386	1.50386	-3.86576	1.32386	0.93749	0.908902	1.02667	-0.746977	-0.61138	1.69364	-4.66139	1.31944	-1.88194	1.20938	0.142348	0.801762	0.206053	0.88623	0.926264	-0.923166	0.010098	-4.15723	-4.66139	0.96001	-3.65633	1.03958	0.46485	-1.68295	-0.133108	-4.66139	-0.00904565	-0.690731	1.93956	-2.4217	1.29762
b0351	mhpF acetaldehyde dehydrogenase 2	-0.803284	0.749515	0.702715	-0.969972	0.342226	0.626811	0.212794	-0.984927	0.538996	0.384646	0.873271	0.391279	1.22718	-1.36214	-0.442405	-0.0868836	-2.87686	-0.61206	-0.498026	0.22825	-0.273386	LQ	0.537485	-0.0451651	1.11987	0.637029	0.729833	-0.197641	1.49856	-1.91893	-1.50361	-1.07871	-0.531398	-0.0406147	0.304964	-0.440634	1.3177	-0.0461816	LQ	0.840143	-2.98849	0.509906	-3.30793	1.38297
b0352	mhpE 4-hydroxy-2-ketovalerate aldolase	-0.400482	0.972154	-0.107273	-1.12874	0.206736	-0.743766	-1.74442	0.282905	-1.43137	-0.724581	0.211453	-0.0482289	0.554741	0.0370392	0.228547	-1.34342	-1.19452	-1.15183	-0.241936	-0.725111	0.315437	-1.94318	-0.60339	-0.224895	0.146502	-0.788821	-0.655309	-0.655534	0.960765	-0.135177	-2.70242	-2.73275	-1.40854	-0.198856	-0.611592	-0.257969	-1.9593	-0.342329	-2.2338	-0.0851298	-3.08099	0.162473	-1.78363	-1.05194
b0353	mhpT MhpT MFS transporter	-0.389424	0.959741	-0.192871	-1.09823	-0.0528716	-0.474837	-0.100591	0.233625	-1.61374	-0.782622	0.181942	0.816071	-0.117787	0.327018	0.421577	0.0880247	-1.40396	-1.47951	1.04157	-1.71113	-0.562969	-1.73919	0.678824	-1.25395	1.35475	0.38299	0.485499	0.972763	0.331243	-0.290871	-1.73775	-1.37093	-0.356815	1.08011	1.57174	-0.32189	1.46664	0.250852	-0.535417	0.468788	2.03537	-0.348453	-0.34125	1.82413
b0354	yaiL nucleoprotein/polynucleotide-associated enzyme	1.65526	0.655083	-0.888163	-0.762142	0.448201	-1.23485	-3.53943	-0.973422	-2.38517	-3.41246	0.334789	1.38455	-0.272718	-0.365062	-0.895454	-0.214658	-2.36546	-2.98959	-0.288251	-0.0562005	-0.535621	1.27575	-0.520643	1.0626	1.17744	1.0131	0.341945	0.853865	1.29477	-0.59835	3.18696	3.1092	1.11559	2.41462	1.13175	-0.162732	-3.6964	-0.283723	0.907965	1.18965	1.52097	-0.229151	1.8311	-0.879528
b0355	frmB S-formylglutathione hydrolase	0.0973781	1.17285	0.584053	-0.0783275	0.0591313	0.242017	1.08885	0.322541	0.346057	-0.505228	1.04136	0.805541	0.625578	0.0361545	0.0369297	0.271363	-1.15418	-0.456671	-1.10841	-0.175258	0.357125	-1.7267	0.902285	1.45225	0.771977	0.598552	0.695217	0.603824	0.143398	1.43493	-1.8281	-1.49992	0.506577	0.760108	-0.445714	0.0255506	-0.392583	0.139704	0.307625	0.345839	0.746687	1.12075	-0.0224647	1.77284
b0358	yaiO outer membrane protein	1.97437	0.505906	-0.747771	-0.628366	-0.88181	1.22524	-4.54382	0.158621	-1.31967	-1.16831	0.251584	-0.698347	0.281727	-0.262355	-0.417285	1.34043	-0.770598	-0.616036	-0.221781	-3.48024	-1.06987	-2.21139	0.833934	1.90014	-0.291638	-0.299218	-0.198157	0.967343	0.492349	0.183225	-0.0729834	-0.0570905	-0.944138	-0.173237	-0.253755	0.574524	-1.35153	0.801874	-0.291325	-0.852422	-1.36997	1.28786	0.682891	1.22637
b0359	yaiX predicted acyl transferase (pseudogene)	1.55569	0.424808	0.246539	-0.230036	-1.60351	-0.173555	0.00320738	-0.626081	-0.300037	-0.833889	1.2049	-0.888241	1.24643	0.064142	-0.360618	-0.054136	1.79664	1.0227	0.772783	-1.32824	1.0238	1.03532	0.209457	-0.422058	-0.621017	-0.106004	-1.13765	0.392401	0.720215	0.655479	-5.25469	-3.88106	-0.341768	-0.968195	-0.148257	-0.120259	-0.412615	-0.753926	0.253999	-0.579602	-1.21546	-0.246879	-0.0481095	2.31745
b0360	insC-1 IS2 element protein InsA	2.14186	0.295866	-2.81802	-1.69639	-1.81222	-0.975571	-0.580547	-1.15744	-8.66593	-7.59448	-0.326244	-3.4947	-0.469385	0.311704	-0.119071	0.754596	1.99442	1.09187	-0.139071	0.0468556	2.55283	-0.744248	-0.396645	-0.063863	-1.10264	0.117559	-0.0716811	-0.56902	0.121247	-2.2751	-0.948853	-1.92058	-0.604364	-0.518332	-1.01493	0.866848	1.20847	-0.0472115	-0.0201085	-1.83258	-0.786116	1.61706	0.600728	1.90454
b0361	insD-1 IS2 element protein	0.715195	0.339055	-0.528432	-0.324104	-1.86957	0.434119	1.50632	0.225417	-5.10263	-3.94207	0.505232	1.31644	0.553637	1.14985	1.3125	0.555001	0.709	1.13395	-1.93544	-0.769414	2.13104	-1.19434	0.797719	0.226173	0.525027	0.328316	0.720575	-0.00212174	0.849708	0.143279	-1.50303	-1.16273	-1.12699	0.329176	-1.40827	0.779273	0.756369	0.447445	-0.662134	0.689104	-0.889	2.26083	-1.45235	0.735579
b0362	yaiF predicted protein	1.95529	0.531507	0.454352	-0.941818	-0.86002	-2.20008	0.144951	-2.15941	-1.65644	-4.54904	0.158148	1.30662	0.844986	-0.050362	-0.273598	0.184484	-0.0609419	-0.447883	0.136584	-2.46633	1.27743	-0.796051	0.228138	-0.567578	-0.314185	-0.695992	-1.38835	-0.172361	1.31708	-0.0545983	-2.38624	-1.92466	-0.654907	-1.77308	0.468414	-0.704796	0.996106	-0.762919	-0.0762857	-0.0168266	-1.68295	0.43707	-0.0263674	1.0724
b0363	yaiP predicted glucosyltransferase	1.51662	0.465801	0.996948	-0.135643	0.0613276	-0.00743908	-1.15872	-0.0495676	-3.36018	-3.1419	1.2646	0.577658	1.03552	-0.224949	0.606659	0.571154	-0.518363	-0.0633079	0.891719	-5.23676	0.13184	0.135523	0.209335	-0.0320319	0.473143	0.415233	1.12932	0.212917	-0.102283	-0.82872	0.259239	2.12246	0.93605	1.32474	0.649723	0.688089	0.812761	1.16225	1.66156	0.290319	1.30451	0.182436	-0.158489	1.22838
b0364	yaiS conserved protein	1.79881	0.503833	0.300695	-0.897067	-0.164295	-1.70286	-0.914376	-1.39036	-1.30548	-3.35328	1.52274	-1.15054	1.22725	0.0171392	-1.14267	0.461005	0.30531	-0.58792	-0.424029	0.70249	0.413509	0.648056	-0.579128	-0.402082	0.169313	0.588828	-0.140437	-0.102072	0.10597	-0.752979	3.3826	2.26729	0.984527	-0.0238427	0.790885	-0.744697	-2.56635	-0.179242	0.0832145	0.681227	-0.150261	-0.657989	0.162459	1.08204
b0365	tauA taurine ABC transporter	0.00790287	0.610891	0.117512	-0.294511	-0.896334	-0.930669	0.605281	-0.116045	LQ	-1.2903	-0.0559629	-2.04854	-1.24505	0.406565	0.61043	0.120678	-0.580164	-0.341115	0.336536	0.792996	2.18177	-0.611311	0.332005	-0.683378	-0.130512	1.09726	1.38097	0.533052	0.570299	0.251736	-3.37932	-2.57812	-0.347982	-1.04956	0.733581	1.264	-0.902893	1.12692	-0.851286	0.650322	-3.7989	-0.689158	-0.317029	1.31414
b0366	tauB taurine ABC transporter	-1.27405	1.06578	1.28494	0.184818	0.5196	-0.0755642	-0.567398	-0.0167636	-0.563922	0.549829	0.306127	-0.848886	0.412145	0.530183	0.239373	-0.327061	-0.509101	-0.275905	0.68546	-1.65862	-0.96104	1.52871	0.826723	-0.757163	1.09186	0.223877	0.248153	0.547859	2.39864	-0.00522519	-1.81222	-1.47715	0.0653304	-1.337	1.79987	1.04635	-1.32419	1.24965	-0.452445	1.26215	-2.13233	1.67223	-0.982205	0.185274
b0367	tauC taurine ABC transporter	-1.38881	0.804374	-0.661281	0.0841777	-0.251454	-0.46372	0.219729	0.425041	-1.03351	0.493974	0.615928	0.474865	0.266324	0.70377	0.92997	0.453687	-0.687127	-0.0043242	0.327703	-2.80628	-1.35447	-0.743043	0.910365	-2.01448	0.483244	0.199745	0.241091	0.227596	1.69512	0.795925	-0.729369	-0.604231	-0.118952	-0.47717	-0.643025	0.658726	-1.96309	0.264374	-2.29431	0.30387	-1.96032	-0.729395	-0.864708	0.694531
b0368	tauD taurine dioxygenase	-0.232679	0.574967	0.530551	1.23211	-0.0701367	-1.69187	1.80128	1.17165	-3.06889	1.04698	0.734981	LQ	-0.278395	LQ	-0.41119	0.431619	1.94211	2.76659	-0.676627	-4.31376	-0.776414	-0.143157	LQ	-2.16247	LQ	-0.107908	0.615731	-0.640045	1.8875	LQ	-6.07578	-2.48826	1.00174	0.456414	-0.0939651	0.0548963	-2.30606	LQ	0.00271688	1.11255	-3.71401	-3.80873	LQ	0.220314
b0369	hemB porphobilinogen synthase	0.450989	0.507389	-1.24916	0.741595	-1.11564	-1.29434	-0.8738	LQ	-1.70975	-2.67924	-0.839148	2.73335	-0.610876	-1.07824	-0.677716	-1.39694	0.567479	0.780897	-1.10864	-2.34531	-1.32873	-1.02407	-0.644859	0.162384	-0.100999	0.475045	0.365634	-1.00701	-0.490723	-0.680374	-1.05933	-0.470821	-0.802479	3.16023	-0.614017	-0.324015	-0.572907	-0.787369	0.94735	0.464789	-0.640888	-1.86078	1.92603	-0.900517
b0370	b0370	1.32768	0.403474	-3.76531	-1.93535	-0.177584	-2.74317	-2.47688	LQ	-2.4348	-2.68903	4.51493	-1.5032	2.60144	-1.64064	-1.27708	-0.0774533	-1.16228	-0.481555	-0.709178	-2.36523	-1.29673	0.354195	-2.17901	-0.60791	-1.75253	-1.34705	-0.202346	-0.0183983	-0.44794	-1.88397	-0.554628	LQ	1.02935	-0.306139	0.246476	-1.01963	-0.723399	-1.472	-0.432477	-1.60788	-0.705947	-4.12996	0.958086	-0.75011
b0371	yaiT conserved protein	3.59433	0.636151	-2.37507	-2.54582	-0.778849	-0.934074	-1.50996	0.326789	-2.10067	-4.39659	-0.219911	-2.81291	-0.148721	-0.95309	-1.13466	-1.45516	-0.455456	-0.84255	-2.60713	-0.0608125	0.42183	0.85814	-1.13095	0.708005	-0.495755	-0.0518264	-0.351851	1.36943	-0.656906	-3.37416	2.29052	1.91959	0.647937	0.351301	0.138285	0.709559	1.01542	-2.30357	0.712237	-1.27323	1.79056	-1.40929	2.00815	-0.153199
b0373	insE-2 IS3 element protein InsE	1.19851	0.447396	-1.77991	-3.60942	-2.17525	-3.223	-1.9273	-2.70253	-3.5001	-4.5493	-1.49844	-0.175467	-1.41813	-1.45589	-2.42023	-1.88742	0.800963	-0.79608	1.00082	1.7622	-1.6971	0.208283	-2.41826	-0.0179758	-1.51989	-0.199712	-0.822317	-1.79191	-1.50901	-2.03329	-5.26094	-4.47089	0.520143	-0.662083	-1.70207	-0.709572	0.483009	-1.01684	0.639823	-0.373135	-4.38185	-2.84235	-1.80095	-0.308271
b0375	yaiV predicted DNA-binding transcriptional regulator	2.65193	0.42018	-4.19325	-2.52621	-3.6189	-3.98774	-3.81143	-1.87743	-6.82674	-7.48207	-2.88743	-0.261587	-3.35795	-2.84602	-2.98182	-3.4784	0.914613	0.415679	-1.89378	0.419779	-2.64974	1.43542	-2.92601	-0.196047	-2.48286	-0.0166769	-0.173842	-3.32543	-2.79054	0.0302076	0.365329	-0.9708	-1.43631	1.09953	-2.3448	-0.903609	-2.64782	-1.80196	1.16171	-0.851503	-2.46956	-4.49788	0.799976	-3.36412
b0376	ampH penicillin-binding protein	0.561889	0.815673	-1.04802	0.105986	-0.0653502	0.0751883	-1.55372	-0.104491	-1.56541	-1.23966	-0.387665	-1.4467	0.228616	0.00684613	0.257897	-0.480455	-0.744538	-0.376458	-0.408603	-1.06657	0.0955637	-0.355452	0.605156	0.425925	0.00244589	-0.299441	0.138408	0.500525	-0.578541	0.369238	-1.80143	-1.21394	-0.429488	-0.199019	0.864299	0.0449062	1.47171	0.416666	0.516712	0.683832	-1.79933	0.351847	-1.40954	1.08186
b0377	sbmA predicted transporter	0.248623	0.763645	-0.148953	1.06811	0.453121	0.707378	4.45709	3.16362	-2.01733	-1.40331	1.71122	0.207764	0.706683	1.15017	1.28462	0.047257	-0.619553	0.0373405	0.695725	0.08185	0.0460267	-2.47007	0.500355	-1.41282	0.647138	0.597974	0.754812	-0.708196	0.82081	1.27719	-4.283	-4.26878	-0.100347	-1.15432	-1.41119	0.669626	6.86533	7.37512	-0.882179	-1.28909	-4.3844	-0.788776	0.289391	1.52978
b0378	yaiW predicted DNA-binding transcriptional regulator	-0.867911	0.91048	-0.923056	0.870784	-0.191855	0.432483	0.549969	0.503868	-0.938618	0.108881	0.52868	0.62601	0.724638	0.0643107	0.188745	1.14425	-0.579293	-0.329513	0.317798	-1.19991	1.19331	-1.2792	0.67514	-0.51634	0.663614	0.716917	0.640197	0.0445029	2.41192	0.57598	0.257091	0.237402	0.482839	-0.205898	1.22508	0.527934	4.70847	3.76689	-0.111177	0.592586	-1.40344	0.56263	0.946571	0.86603
b0380	yaiZ predicted inner membrane protein	-0.379785	0.691247	-1.53286	-0.369463	-0.561645	LQ	-1.12756	LQ	-0.967517	-0.342548	-1.54818	0.907305	-0.610476	-0.233508	-0.118968	-0.64555	0.170446	0.178142	0.50385	0.443629	-1.74549	0.635133	0.126575	0.994468	0.524756	-0.280742	-0.171074	-0.0333418	0.120647	0.371839	-1.2205	-0.886141	0.238755	-0.122923	-0.798546	0.396341	3.13229	0.914586	-1.20805	0.490596	1.21028	-1.63423	1.65325	1.44944
b0381	ddlA D-alanine-D-alanine ligase A	0.557589	0.646969	-1.2697	0.388662	-0.404534	-1.01317	-3.07777	0.000220597	-0.831807	-1.68452	-0.689797	0.544903	-0.377696	-0.501861	-0.57448	-0.878766	-0.952055	-1.16254	-1.92565	0.728467	0.772065	-0.721721	-0.375996	-1.05375	0.14637	0.219699	0.237379	0.278044	-2.35167	-2.09615	-2.17414	-2.13108	0.0374444	-0.319846	-0.0325621	0.145013	-2.2825	-0.258849	-0.312303	-0.0126652	0.68333	-0.202169	0.417409	1.372
b0382	iraP anti-adaptor protein for sigma; S stabilization	1.46269	0.600872	2.13926	0.0621276	0.081258	-1.10791	1.5399	LQ	-0.939073	-2.34084	1.35876	0.675776	1.67421	-0.558018	-0.85562	0.177587	-0.0961776	-0.149494	0.209871	-1.69632	1.01406	0.257975	-0.382528	-0.72117	0.636898	0.0805645	0.0729405	2.40469	1.17287	-0.770591	1.58699	0.961864	2.0891	0.135683	1.23472	-0.453437	-1.90902	1.02325	0.566977	0.482349	2.06076	-0.337008	0.596414	2.40977
b0383	phoA alkaline phosphatase	0.486404	0.497407	-0.0762077	-0.708338	-0.631421	-0.0474175	1.23762	0.0104639	-1.22891	-0.196142	0.280287	-0.627732	0.732918	0.594191	0.669941	-0.457137	0.503628	0.399266	0.27058	-1.89783	0.668903	-1.01195	0.536216	1.54569	0.281212	-1.07896	-0.276644	0.689408	-0.0348045	1.20423	-0.85117	-0.948461	0.127763	0.663769	-0.443133	0.395947	-0.487595	-0.927441	1.41623	-1.15107	-2.70012	0.982812	-0.450118	2.13766
b0384	psiF conserved protein	-0.019761	1.06195	-1.24581	-0.47498	-0.0676263	-0.641068	-0.858733	-0.308364	-0.611321	0.452055	-0.408148	0.0727683	0.205049	0.477879	0.343762	-1.1191	2.16968	1.82142	-0.851995	0.609908	-1.32841	-0.101307	-0.114851	0.499756	0.426452	0.336471	0.101481	0.233842	-0.547272	-0.260891	-1.90561	-1.61296	0.375863	0.0319043	0.637547	-0.483381	0.799713	-0.558707	-1.4999	0.760735	2.35408	-0.286066	-1.32875	-0.972719
b0385	adrA predicted diguanylate cyclase	-0.365189	0.524732	-3.06224	-1.68739	-1.19208	0.804362	-0.700464	0.370155	-1.90746	-1.35869	-0.202665	-1.79374	-2.87569	-0.0918596	-0.299854	-2.87199	1.27016	1.12633	-3.04548	-3.83228	-1.70303	0.951841	-1.06682	0.731171	-1.36496	0.305136	0.471512	-0.39705	0.120519	-0.77323	-5.14454	-3.98097	-0.889043	-3.27613	-0.85782	-1.72662	-1.26921	-0.749741	-4.00044	-1.41758	-0.394921	-1.99003	0.416991	-1.41384
b0386	proC pyrroline-5-carboxylate-reductase	-1.23927	0.729701	0.783513	0.113404	-0.0410902	0.388174	-1.32426	-0.675937	-0.382278	0.24516	0.701804	-9.85404e-05	0.542845	0.550721	0.612473	0.380374	0.624025	1.42436	-0.421258	0.365992	-2.16504	-0.383547	1.46706	1.0881	2.03375	0.883686	1.0613	1.82314	1.78263	2.23163	0.178377	0.726963	-0.903402	-1.2298	0.403576	0.35281	-2.07726	1.71977	-0.0972901	0.439215	1.90715	1.86159	-1.16043	2.51308
b0387	yaiI conserved protein	-1.66014	0.79867	0.67991	1.08508	0.342608	0.932481	-1.31231	-0.0319607	0.611649	0.29296	1.3627	2.52997	0.547834	-0.0420798	0.156405	1.24636	0.327263	1.09049	1.20613	-0.5224	-1.33411	0.223467	0.89251	0.887453	1.48004	0.0479844	0.67289	1.17835	0.244448	1.14632	-0.638981	0.32403	-0.0350412	-0.240386	1.79284	0.35135	-1.26477	0.604712	0.36458	0.621735	0.329433	0.615043	-0.756475	1.99618
b0388	aroL shikimate kinase II	-0.837295	0.86685	0.186629	2.13939	0.213454	-0.0921258	-0.777616	-0.327246	-0.399157	-0.24598	0.651778	0.65189	0.0427127	-0.763872	-0.751617	-0.478895	0.540163	1.05981	-0.192808	-1.2156	0.395454	0.461848	0.47795	0.768337	1.54394	1.19565	1.27428	-0.176889	-0.0525648	0.285191	-1.53004	-0.908693	0.0663097	0.18544	0.135962	0.651337	-1.3649	0.219886	-1.42945	0.301359	-0.325273	0.838257	-0.545189	1.442
b0389	yaiA predicted protein	0.0184852	0.367299	-1.16516	0.219598	-1.2187	-0.537421	-2.43822	LQ	0.816657	-0.395716	-0.289969	0.915897	-0.758279	-1.34711	-0.677931	-1.52136	4.80674	3.22132	0.00925884	-1.97973	-2.54251	-1.14397	0.186359	3.76335	0.86979	0.665395	0.251366	0.667453	1.35372	1.01123	-2.84551	-2.11401	0.689315	0.612456	-0.42421	0.7938	-2.13705	1.15086	-1.87902	-0.131192	-0.571048	-2.11875	1.29005	2.1318
b0390	aroM conserved protein	0.823017	0.506391	-4.31008	-2.73242	-2.3556	-1.89861	-1.08366	-1.96122	-2.19394	-4.24091	-1.02175	-3.22363	-0.490798	-2.17544	-2.5789	0.0605686	-4.32161	-3.15563	-1.88989	-1.83484	-4.36179	-1.19922	-1.23243	0.243086	-4.20112	-0.502271	-0.84491	-0.683153	-1.53154	0.658739	-4.90049	-3.56642	-1.55673	-0.544041	-0.563828	-1.66776	-1.54258	-0.0849013	-2.83085	-3.28561	-4.2354	-2.9378	-1.27831	0.142033
b0391	yaiE conserved protein	0.493533	0.537736	-0.977007	0.087144	0.176256	0.128745	2.92288	1.30704	-0.354061	-1.13883	0.578295	2.67102	1.17988	1.14104	1.01697	1.65291	-2.0761	-1.20098	1.41778	-1.9087	0.613763	-0.857561	1.16122	0.237216	-0.345092	-0.155788	0.203298	0.777586	0.434167	0.804735	0.941188	LQ	-0.813518	-1.05189	-1.69805	0.383671	0.645757	1.15116	-1.04822	1.43602	0.580226	-0.405049	0.184482	2.99506
b0392	ykiA predicted protein	1.44334	0.323712	3.88869	-4.38824	-1.24473	-1.55226	2.4092	0.576819	1.19802	-2.19983	1.96852	-4.50725	2.29615	-0.827374	-2.1597	3.82586	-5.21276	-4.90489	-0.825646	-1.26193	3.53803	-0.982881	-0.00400807	-1.47607	-1.21282	-0.18442	-1.46307	0.856095	-0.0348101	2.1108	0.242851	-1.47674	-0.160001	-2.19375	-2.13456	0.352973	-1.61528	2.82705	-0.446592	-0.110191	-2.67161	4.07268	-1.9454	5.33564
b0393	rdgC nonspecific DNA binding protein; nucleoid component	-0.147834	0.588081	-0.845484	-1.01292	-0.275467	-0.268628	-1.91977	-0.699711	-0.919729	-0.13837	0.569956	2.08417	0.630924	0.268624	0.415378	-1.27913	-1.73384	-1.05813	0.0102112	-2.47115	-0.926601	-1.4719	0.214923	-0.837872	-0.00559352	0.673932	0.661097	-0.124316	0.563662	-0.102764	-0.614181	0.308695	-0.844713	-0.677342	-0.838403	0.563626	0.309353	0.139884	-1.03186	1.33243	-1.5756	0.149566	-0.961945	1.86531
b0394	mak manno(fructo)kinase	-0.136118	0.866699	0.37821	0.163584	-0.539148	-0.655082	0.536687	0.00229321	-1.30211	0.293269	0.580764	0.596582	0.5778	0.677673	1.01302	-0.278285	-0.723735	-0.363737	-0.98525	-1.8546	-0.259357	-1.10942	0.744316	-0.0824477	0.910906	-0.175506	0.281555	0.643252	0.104004	-0.131142	0.996069	1.43659	0.154634	0.334549	1.02282	0.420988	-0.932767	0.98332	0.774112	1.14137	-1.78922	0.208959	0.758204	2.21053
b0395	b0395	-0.114383	0.47796	1.17819	0.143582	0.080773	1.09767	-0.355344	0.569637	-0.0572858	0.662668	0.65889	1.41461	0.333938	0.185484	-0.096231	-0.188913	-0.791347	-0.362572	0.428464	-0.110594	0.160956	-0.611892	1.18035	0.0135679	1.01306	-0.285027	0.0685507	-0.585231	0.87862	0.704093	-1.17776	-0.837352	-1.36222	-0.210361	-0.55996	0.0387172	-1.00643	1.09869	-0.743301	0.722468	-1.00284	-0.263164	-0.2732	0.435503
b0396	araJ AraJ MFS transporter	1.80841	0.504681	0.193722	-0.0561175	-0.98711	-0.538784	-1.33809	-0.108301	-2.98501	-3.6927	0.231232	2.37851	0.678327	-0.027827	-0.0896554	-0.0855525	-1.80876	-2.01735	0.230418	1.79564	-0.67734	-1.02643	0.583403	-0.458283	0.874305	-1.29852	-0.943902	-1.7969	-0.313887	0.401274	-2.98827	-3.40498	-1.11588	-0.593655	-1.11651	-0.654843	0.75563	-0.215346	0.0969956	0.312955	-2.39696	0.567922	-1.13929	0.989803
b0397	sbcC ATP-dependent dsDNA exonuclease	-0.113745	0.626057	-0.0886198	-0.52383	0.143153	-1.14344	0.512059	0.0667386	-1.95505	0.32082	0.0220507	0.441124	-0.636589	-0.435045	-0.509844	-0.728412	-0.868972	-0.789445	0.60354	-2.03424	-1.46421	-1.59908	-0.0567143	-0.624248	0.486908	-0.384931	-0.618267	0.0747332	0.796104	-0.172054	-3.07924	-3.17924	0.0761458	1.38837	1.56671	-0.369344	-2.54788	0.16113	-2.29581	1.01118	-2.73842	-0.0424845	-2.32878	-0.493681
b0398	sbcD ATP-dependent dsDNA exonuclease	-0.117111	0.739462	1.17123	0.79199	0.319781	-0.188684	2.28896	0.474353	0.943786	-1.37897	0.585309	-1.28565	-0.252248	0.0685949	0.205291	0.980694	-3.61828	-2.89738	-0.513061	-2.55377	-1.27811	-0.350111	0.488075	-0.81357	-0.38378	-0.238376	-0.0743061	-0.300411	-1.3173	0.709946	0.70571	0.986648	0.0785718	-0.403876	-0.425725	-0.213235	-0.809091	0.677173	0.487664	-0.257225	-3.64625	-0.564453	-0.805865	-0.685622
b0399	phoB PhoB-Phosphorylated transcriptional dual regulator	-0.575731	0.670079	0.802552	1.67168	0.69346	0.0586684	1.08943	0.378152	0.533292	-0.658728	0.837469	0.990519	0.974111	0.170489	0.0107798	1.02917	-2.81027	-2.49651	0.268922	-3.32509	1.02356	-0.65417	1.44596	-1.07559	-0.223236	-1.1632	-0.867034	0.119427	-0.595596	0.106017	-2.73377	-2.54232	0.067235	-1.25847	0.116708	0.0305717	-0.447464	2.21291	-0.688617	-0.623359	-3.53568	2.07186	-1.97449	-0.667196
b0400	phoR PhoR-P his	-1.1203	1.06404	-0.644893	-0.12128	-0.105708	-0.465938	-0.276252	0.462654	-0.340439	-0.264411	0.523882	1.06313	0.541152	-0.101035	-0.16656	0.537727	0.538626	0.400821	-0.50318	0.412089	0.854216	1.03783	0.854001	0.0826568	-0.427929	-0.563586	-0.371122	0.699159	0.563684	1.53712	0.483394	0.17219	-0.0761567	1.01433	0.386899	0.518094	-1.01495	0.469318	-0.967498	0.213652	-1.70448	0.597564	-0.493306	-0.154963
b0401	brnQ BrnQ branched chain amino acid LIVCS transporter	-0.401171	0.892663	-0.992336	0.112771	0.0691277	-0.368179	2.77628	1.03164	0.23004	-1.00099	-0.661104	-1.39761	-1.18858	-0.295252	-0.221674	-0.829172	-2.54881	-2.03477	-1.46192	-2.48527	1.73261	-1.81184	0.366334	0.943933	2.06381	0.706578	1.08134	0.82738	0.895428	-1.32002	0.880935	1.02512	0.581298	-1.86019	0.612559	-0.775661	-2.32368	1.07979	-0.557694	-0.814326	-0.506196	0.995953	-1.50424	-0.183999
b0402	proY ProY cryptic proline APC transporter	0.0584939	0.795343	-1.54513	-0.414355	-0.0409245	-0.318702	0.366397	-0.647275	0.50973	0.605516	-0.78549	0.393712	0.582094	0.602271	0.688626	0.785159	0.526101	0.442858	2.01102	-1.30218	1.67613	-1.57898	0.948093	0.650931	1.12775	1.01849	1.11129	0.890254	0.699918	-0.879249	-0.605139	-0.479183	0.155776	-1.18695	-2.67566	1.34858	-2.16909	0.40064	0.170206	0.270505	1.64401	0.935291	-0.568649	0.963605
b0403	malZ maltodextrin glucosidase	-0.118542	0.878091	-0.210447	0.664172	LQ	0.248248	-0.694946	LQ	LQ	1.68293	0.676314	-0.312442	0.589774	0.17063	0.348893	-0.0411497	-0.335077	-0.157987	0.66149	-3.12489	-0.235497	-0.136538	0.587587	0.0646843	1.25421	0.118164	0.407655	LQ	-0.514112	-0.836281	-2.14146	-1.6369	1.05655	1.00354	0.803366	0.747869	-2.47241	0.928439	0.730854	0.0235156	-3.74551	0.21931	0.918704	-0.485596
b0405	queA S-adenosylmethionine:tRNA ribosyltransferase-isomerase	-1.07037	0.729695	2.11124	0.960354	0.124886	1.64196	-1.23154	1.00149	-0.112563	1.63194	0.339642	-0.163395	-0.473214	0.237969	0.387615	-0.655167	-0.965812	-0.958225	0.782759	1.2612	1.53745	0.26363	1.43091	0.826607	-0.194413	-0.235073	-0.17376	-0.483196	-1.10776	0.735147	-2.91478	-2.50831	-0.158469	1.46124	-0.377328	0.948193	-2.51706	-0.00510693	-0.701817	0.750475	-2.19046	-0.122307	-1.76455	-0.975093
b0407	yajC Sec Protein Secretion Complex	-1.35113	0.566369	0.813692	-0.204077	1.08147	0.738831	-0.161753	-0.786818	1.14681	0.623409	-0.113678	0.833775	-0.564455	0.258957	0.267352	0.808562	-1.14442	0.173119	0.738678	6.34366	-1.15404	-0.400083	0.129395	0.142066	0.329291	-0.830822	-0.00401745	-0.0643937	0.806242	0.774896	-1.26802	-0.799471	0.233655	-0.267629	-0.593116	0.0566914	-1.19268	0.969779	-0.6043	0.310744	-0.662007	0.975296	-0.0498783	0.244178
b0408	secD Sec Protein Secretion Complex	-2.80226	0.514333	-1.2316	3.70031	0.622194	0.870343	0.0291045	0.439931	-1.22646	1.59368	0.0056425	1.445	-0.541684	1.77484	1.45752	-0.324858	0.481843	0.522594	1.1535	4.16267	-1.8623	-0.82732	1.47417	2.17827	1.14472	0.776808	0.213762	-0.896103	1.53168	1.61197	-0.156668	-1.62674	-1.63965	-0.00836454	-2.95463	0.135635	-1.62259	1.99012	-1.27971	1.4021	2.03609	-0.632816	0.466614	-0.185911
b0409	secF Sec Protein Secretion Complex	-2.39779	0.554339	-0.0408914	4.17938	0.341616	1.33366	0.754084	1.34361	-0.131933	2.09434	0.73135	1.91261	0.819535	1.47327	0.949503	-0.562352	-0.254402	-0.28228	0.401375	2.87235	-1.79173	-1.22765	1.73732	-0.500649	1.47721	-0.173424	-0.439205	1.17943	0.81316	1.8404	-0.757139	-1.28168	-0.919313	-0.518563	-2.43678	2.21477	-1.93287	1.50226	-1.8889	0.963212	-0.784041	-0.621616	0.123363	1.32688
b0411	tsx nucleoside channel; receptor of phage T6 and colicin K	0.525013	0.960034	0.626992	-0.312229	-0.319969	0.271177	-1.05523	0.41469	0.858033	0.911784	-0.390791	0.888561	-1.31508	-0.212731	-0.442346	-0.42713	0.755399	0.589791	-1.35708	-0.855404	-0.59091	-0.985888	-0.330408	-1.22966	0.45128	0.234932	0.107451	-0.614455	0.0826803	0.767929	0.182102	0.159868	0.62973	-0.844412	-0.48593	-0.427308	-0.67709	0.557687	-0.679342	0.121805	1.02708	-1.34158	-0.687836	0.440497
b0412	yajI predicted lipoprotein	-0.457623	1.02197	-0.0483424	1.97072	0.691168	1.11331	0.593089	1.11654	1.14427	1.15268	0.192533	0.0559596	0.234966	0.450361	0.142352	-0.735003	-0.613254	-0.453184	0.517	1.0483	2.03352	0.898139	0.56232	-0.265312	0.357322	0.253617	0.0380459	0.540188	1.10283	-0.00706493	2.51899	2.40821	-0.423901	0.174369	-0.0869115	-0.584091	-1.84806	0.735297	0.698209	-0.842532	1.76714	-0.517356	0.873032	-0.387598
b0413	nrdR DNA-binding transcriptional regulator	-1.02089	1.00732	3.38622	4.18979	2.42363	2.82308	3.34918	3.07685	2.17688	2.89193	-0.551724	0.182306	-0.788133	0.428159	0.358284	-0.790189	2.11135	1.98131	0.45262	1.91927	1.0449	-0.454042	0.000723799	-0.683296	0.446006	0.216727	0.267775	-0.165202	0.521118	0.204406	-1.1994	-0.422583	0.0436613	-0.0875569	-0.987558	0.0875977	0.0086853	0.644679	-0.442819	0.24086	-0.513666	0.934554	-0.340808	0.18303
b0414	ribD fused diaminohydroxyphosphoribosylaminopyrimidine deaminase / 5-amino-6-(5-phosphoribosylamino)uracil reductase	-2.51566	0.454635	5.18069	6.69255	2.89591	4.40268	1.42075	3.53345	4.15683	6.63123	-0.709478	2.10882	-0.999408	1.08037	0.99231	-1.75058	2.07942	2.89032	1.43533	-1.11542	-1.3338	-1.5449	1.09806	-1.68186	1.51305	1.65196	1.94878	-0.149746	1.69322	1.96791	-2.04899	-1.69906	-1.60792	-0.164697	0.98505	-0.986885	-2.04031	2.20873	-1.91021	1.39705	-1.35274	-0.323831	0.384292	-1.07553
b0415	ribE 6,7-dimethyl-8-ribityllumazine synthase	-2.24538	0.364904	1.08068	2.7703	0.449223	1.62148	2.33687	4.52117	1.68675	4.62959	-0.220764	2.47876	-0.0812093	1.99831	1.70909	-0.861968	1.83406	2.24239	1.94031	-0.825167	-0.946273	-1.31808	1.64661	-1.4696	1.97863	1.66524	1.66204	-0.496656	2.28697	2.69501	-1.71728	-1.56431	-2.38061	0.335934	-1.78	-0.503892	-1.39829	2.67084	-1.85749	1.29482	-0.718526	-0.522755	0.677643	-0.610636
b0416	nusB transcription antitermination protein NusB	-2.25395	0.416915	3.1733	6.07687	3.14235	2.82984	4.75711	2.40099	2.90093	4.3382	0.932694	2.9182	0.907019	1.29022	1.98292	1.53426	0.266006	1.4098	1.69784	-0.0180461	0.620491	0.695282	1.91156	0.53838	1.7421	-0.249425	1.36873	2.13978	2.08748	2.43961	-1.8728	-0.421834	0.44427	0.556024	0.284011	0.62619	-0.0601714	2.99188	-0.157506	1.46445	-0.0119234	1.49989	0.25859	2.06623
b0417	thiL thiamine monophosphate kinase	-2.52562	0.790326	0.402612	3.96634	LQ	2.71312	6.70077	2.168	LQ	1.65652	-0.492473	2.72661	-0.807381	1.00692	1.16301	0.628913	2.17295	1.85777	1.44863	1.78443	-1.53021	1.58006	1.92269	1.59446	2.32736	1.13657	1.08907	LQ	0.505695	1.07523	-0.802284	-1.76081	LQ	1.31492	LQ	-0.257099	0.202549	1.25432	-1.40979	1.59321	-0.396931	-0.986395	-0.362943	1.90893
b0418	pgpA phosphatidylglycerophosphatase A	-0.796606	1.2127	-1.31654	-0.273182	0.224533	0.852039	-0.280444	-0.519677	-0.814395	1.10481	-0.55488	0.502826	-0.547091	0.994084	0.858081	0.305769	-0.265186	0.0279919	0.88002	0.25497	-1.58409	1.86944	-0.130875	0.648891	1.0737	1.15761	1.02215	0.176975	-0.498016	0.273227	-1.70633	-1.24392	0.467327	-0.11781	0.303607	-0.992698	-0.668609	0.994552	-0.248044	-0.814628	2.28223	-1.07042	-0.976371	1.26643
b0419	yajO putative NAD(P)H-dependent xylose reductase	-0.93132	0.855394	0.108653	-0.00289862	0.722683	1.21506	0.0397512	0.000716307	0.521148	1.20719	1.0461	0.0536879	1.39972	0.626952	0.641675	1.51869	0.486038	0.466567	2.48268	-0.953062	-1.09721	1.10597	0.691491	0.959632	0.25377	0.775673	0.717746	0.924265	0.309395	0.145593	1.24379	1.71238	0.505618	-0.215796	0.655813	0.132739	-0.383042	0.693959	0.934431	0.310247	0.55532	0.984351	-0.360136	-0.493128
b0421	ispA geranyl diphosphate synthase / farnesyl diphosphate synthase	-2.17494	0.520877	5.89468	7.93007	4.74723	6.41226	8.26922	7.5681	2.72691	7.21766	-0.248377	1.4242	-1.15749	1.12511	1.14813	-0.376589	0.939425	0.962301	1.64934	-1.03824	2.26929	-1.38253	1.692	0.732028	1.28707	0.124743	0.354847	0.152024	1.39605	1.56057	-1.5935	-2.35934	-1.20096	0.155585	-1.44521	0.317931	-1.54739	2.26175	-1.57896	0.877798	5.22963	-0.695917	0.158486	1.19618
b0422	xseB exonuclease VII, small subunit	-1.25772	0.708035	6.58254	6.66058	4.08179	4.27109	8.15975	7.33698	4.85694	6.11454	1.77517	1.01746	-0.066168	0.237935	0.316372	-0.0280154	-0.253015	0.125861	6.23123	-0.382663	2.70762	-0.787325	1.11783	2.3909	2.93881	2.01963	2.27082	1.83461	0.761833	0.908856	-0.806703	-0.766087	1.30669	4.96451	2.65461	-0.411524	-0.820146	1.52558	-0.717522	1.01164	-0.346977	0.721338	-0.0990315	2.08376
b0423	thiI ThiI	-0.495668	0.314419	0.417221	2.26386	1.18101	LQ	2.38959	LQ	0.0821878	2.81796	0.116393	2.42046	-0.228529	0.0769306	0.322548	-1.88703	0.107938	LQ	2.09113	-1.55887	0.759051	-0.896238	2.34342	-0.473498	2.39505	1.00357	1.36135	-1.26745	2.04218	3.061	-2.12463	-1.62263	-0.768163	0.894113	0.13948	-0.271335	-2.06464	3.76598	-1.39927	2.52601	-1.80908	0.506362	0.880644	2.20334
b0424	yajL conserved protein	-0.152873	0.424755	-0.115296	-0.793175	0.761411	0.0638988	-4.03095	-0.891306	-1.44206	3.30728	0.136477	-0.459324	-0.959079	-0.366937	-0.612869	-2.27632	-1.27652	-0.645855	2.23827	-4.28753	2.78181	-3.58881	0.738879	0.0174047	0.110779	-0.487632	-0.0746919	-3.05549	-1.11049	0.189591	-3.83872	-2.56524	-1.8022	-1.20785	1.10939	-1.80136	-5.62465	1.85673	-2.83942	-0.547245	-4.84723	-4.10886	-2.80381	0.313634
b0425	panE 2-dehydropantoate reductase	0.123071	0.81508	1.31714	0.64947	2.26106	1.9974	-0.0884459	-0.31887	3.02979	3.17194	-0.162073	-1.43047	-2.14469	0.0443306	-0.217471	-1.98426	1.85177	1.63676	1.2948	0.672065	0.46215	-2.50319	0.355314	-0.477894	0.359047	0.76418	0.672513	-0.977189	-1.91513	-0.659827	2.5262	2.74028	0.483948	1.40852	2.46837	-0.860426	-1.68749	0.456368	-1.18803	-0.970903	-2.33605	-1.74593	-2.0447	2.90687
b0426	yajQ nucleotide binding protein	0.274582	1.34092	0.612503	-0.112712	0.490831	0.00163407	-1.00971	0.723426	0.648539	0.498388	-0.131273	1.21936	-0.3026	-0.0716894	-0.212609	0.419194	-0.598567	-0.388587	-0.85477	-0.64703	-1.52051	-0.893932	-0.362677	-0.750955	0.882984	0.057366	-0.0457677	-0.124735	0.0212234	0.09327	-1.65036	-1.06169	0.214777	-0.899456	-0.179421	-0.277852	0.600262	-0.0657163	0.859797	-0.639762	-1.36971	0.554634	0.302504	-1.10212
b0427	yajR YajR MFS transporter	-0.568123	0.777067	3.34978	3.79464	3.07905	2.71135	3.19136	2.11634	2.13618	4.45542	0.0723368	0.107235	0.525285	1.37216	1.58111	1.17163	2.15654	2.37206	-1.53003	-0.353818	1.27401	-1.34152	1.34282	-0.515328	0.723107	-0.129396	-0.22127	1.51949	-1.91169	0.377667	-0.121698	0.181388	0.234504	0.588104	1.39328	-0.301251	-2.51151	2.12837	-0.92766	0.954921	2.71201	2.37109	-1.84809	-1.75291
b0428	cyoE heme O synthase	-0.558217	1.1168	5.2843	5.46723	4.7682	5.14542	5.97942	4.10126	5.1131	4.45549	-0.458382	-1.07139	-0.30223	-1.17733	-1.38884	-1.44839	-0.790196	-1.08402	-0.91981	-1.97608	-2.30194	-1.91558	-0.219924	1.02196	-0.125984	-0.80923	-0.836968	-0.601402	-1.35193	0.104266	-1.74723	-2.1362	-0.400318	-1.07323	-0.262534	-0.325121	0.613198	-0.102282	-1.04726	-1.11702	-2.00933	0.638495	-1.75904	-0.939212
b0429	cyoD cytochrome bo terminal oxidase subunit IV	-0.570444	0.639201	6.91313	7.18629	6.16778	5.70645	8.06067	5.16298	8.88332	5.30067	-1.48925	-0.260177	-1.00061	-1.31187	-0.58961	-0.601346	-1.14745	-0.502008	-0.676702	-1.76426	-1.48347	-1.58854	0.323465	0.472786	0.178445	-1.00011	LQ	-0.800563	-0.35206	-0.300989	-2.32526	LQ	0.673604	-0.972564	-0.811363	-1.25273	0.218021	0.552113	1.44668	-0.546303	-1.60754	-0.763623	-1.70531	-0.821557
b0430	cyoC cytochrome bo terminal oxidase subunit III	-0.882112	0.92847	5.98594	6.61759	6.15806	6.48618	6.574	4.22723	5.39691	5.94907	-1.49078	-1.27604	-1.38418	-1.70159	-1.87217	-1.70828	-1.78835	-1.82863	-1.47979	-1.7065	-1.8354	-2.25201	0.00992956	-0.977112	0.808285	-0.758594	-0.605658	-1.9937	-0.929635	-1.16495	-2.59362	-2.54884	-0.315918	-1.36925	-0.00164925	-2.06033	0.822913	-0.444929	-1.4146	0.479072	-1.9098	-0.663504	-1.98484	-1.20331
b0431	cyoB cytochrome bo terminal oxidase subunit I	-0.647908	1.0318	5.20918	6.07568	5.46667	5.48577	5.6221	4.45359	5.52463	5.31271	-2.15535	0.761838	-2.9078	-0.777739	-1.55303	-2.16332	-0.959332	-0.930323	-0.230803	0.532585	-3.14581	-2.65125	0.568436	0.409054	0.536297	0.757195	0.710685	-1.20998	-0.681908	-0.414262	-0.37626	-0.268269	0.57184	0.537892	0.136046	-1.44915	-2.74069	-0.216985	-1.31118	-1.04175	-0.648176	0.24132	-1.82706	-2.60662
b0432	cyoA cytochrome bo terminal oxidase subunit II	0.983963	0.990302	5.42994	LQ	4.32619	LQ	6.32364	LQ	5.05333	3.99471	-0.267985	-0.902706	-0.522622	-0.492499	-0.472132	1.20849	-0.019199	-0.029619	-1.59272	-3.28526	-1.46607	-1.83595	-0.449238	-0.489914	-0.980651	-0.934893	-0.814059	-0.545611	-1.34302	-1.40766	-0.420547	-0.197258	0.0103166	-0.00317796	-1.09384	-0.880758	-3.31463	-0.233342	-3.24352	-1.96401	1.31333	-0.345072	-0.0795976	-2.07947
b0433	ampG AmpG muropeptide MFS transporter	0.0417111	0.722069	0.377032	5.42158	4.13556	4.02657	-0.722359	3.21663	-0.0697878	4.17756	-3.31489	-2.85889	-3.88068	-2.9293	-2.82279	-4.36695	-2.64124	-2.22967	-2.57506	-2.44893	1.33521	-2.91153	-0.202151	-1.29034	-1.16102	-1.16828	-1.4286	-0.788971	-0.260435	1.09122	-2.79786	-3.57686	-0.870973	-1.29994	0.0345379	0.145296	-3.60986	-1.05134	-0.871489	0.149928	-3.42681	-1.10922	-3.86177	-0.431635
b0435	bolA BolA transcriptional dual regulator	-0.215541	0.543438	1.01309	-1.10778	0.615044	0.240664	-2.05068	0.209155	3.24579	1.9327	-0.153259	-0.116898	-1.38462	-1.11472	-0.840005	-0.337563	-2.34023	-1.22235	-1.29983	-2.43559	-0.130714	0.0459028	1.15506	-1.79458	1.76233	1.31949	LQ	0.231538	1.81201	0.940626	-2.65412	LQ	-0.318526	-1.20159	-2.10048	0.464838	2.27869	1.61577	-2.58823	-0.302429	0.0138881	-1.68915	-2.01784	0.499538
b0436	tig trigger factor; a molecular chaperone involved in cell division	-0.709691	0.7205	-2.06237	-1.63234	-1.4642	-0.77715	-1.9232	-1.3975	-0.912113	-0.166848	-1.70663	-1.62236	-1.88325	-0.730921	-1.42558	-1.41681	-1.51897	-1.56433	-1.03026	2.65358	-2.88201	-2.92076	0.843049	-1.03363	-0.178628	-1.205	-1.34365	-0.636935	-0.70771	-0.154293	-3.18592	-3.62252	0.241619	-0.618818	-0.103113	-0.0139663	-0.52658	0.660372	-0.372272	0.351698	-2.38398	1.5778	-2.21468	1.50138
b0439	lon DNA-binding, ATP-dependent protease La	-1.55368	0.445974	-0.508071	0.130186	0.0019579	0.0481391	0.657848	1.8532	0.844342	1.8248	2.65267	2.94745	4.95337	4.07121	3.59111	3.04184	1.86187	1.37872	1.09103	-2.02634	-1.84937	-1.77846	2.04436	-0.123607	1.29709	0.202143	-0.219417	4.89704	6.41319	7.70779	6.47627	6.73165	-0.998621	-0.457699	-0.616653	-1.06812	-0.676084	2.1338	-0.657943	1.32526	9.68309	-0.164711	3.042	-1.55863
b0440	hupB Transcriptional dual regulator HU-beta;, NS1 (HU-1)	-0.0501603	0.546579	0.771461	-1.23604	-1.30191	-0.67776	-0.811691	-0.548093	-0.116748	1.76361	1.91917	1.36546	0.43774	0.387725	0.210178	1.1288	3.32433	3.05325	1.16122	-2.38851	-2.77119	-1.00936	0.416637	-0.305933	0.897788	1.81471	1.23264	-0.6938	-0.551607	0.288861	-2.9654	-2.28624	0.555484	2.66759	1.31128	-0.0564127	-2.56229	-0.365466	-2.50383	0.655348	-1.20731	-0.126849	-0.306884	-2.21538
b0442	ybaV conserved protein	-0.654492	0.938579	0.299345	-0.10657	0.567136	0.948713	-0.916799	-0.517842	0.20608	0.710746	0.934749	1.52064	0.3841	0.749221	0.74431	1.61901	0.145819	0.38866	-0.228222	1.85386	-0.632774	-0.247006	1.14514	-0.129679	0.363866	0.396563	0.631407	-0.129326	0.115247	0.210246	-1.02456	-0.667204	-0.222487	0.772606	-0.606067	0.462771	0.363692	1.84897	-0.933285	0.298168	1.71512	1.46519	-0.378301	2.31896
b0443	ybaW conserved protein	0.482068	1.51269	0.668909	-0.357079	0.928689	-0.0674774	-1.25248	0.471368	LQ	0.164513	0.195226	1.01565	0.5148	0.819873	0.669555	0.534981	1.3292	0.985113	-0.207646	-0.900415	-1.44042	0.558577	0.318081	-0.110728	0.0651075	0.224742	0.0298503	0.111887	0.669483	-0.121857	1.14177	1.06803	0.298988	-0.554513	0.741591	0.476687	1.0249	-0.354818	0.620559	-0.0769494	1.21213	-0.334049	0.525173	0.393205
b0444	queC enzyme in preQ 0 biosynthesis	0.131363	0.958635	0.301077	0.454645	0.211498	0.288568	0.806725	-0.227806	0.112232	1.03373	0.282275	0.455442	0.758743	0.652633	0.819823	1.30104	-0.18928	0.12087	1.22677	0.394267	-0.145421	-0.111602	0.709291	-1.15418	0.623003	0.765348	0.916353	0.94701	1.52611	0.717658	-1.79331	-1.47711	-0.481103	-0.447461	-0.236196	1.28229	1.41719	0.458914	0.979476	0.0199703	1.50001	1.57606	-1.35703	1.00606
b0446	cof pyridoxal phosphatase / HMP-PP hydrolase	0.155639	0.90433	-0.379086	-0.71724	-0.458775	0.126876	-1.60068	0.359262	-0.315062	-0.111719	-0.362707	0.168878	-0.137427	-0.285718	-0.301271	0.14176	-1.60076	-1.38845	0.825411	-2.61952	0.283767	-0.177086	-0.029348	0.617187	0.0622836	-0.798038	-0.689276	-0.555927	0.412439	-0.403279	-1.26573	-0.946089	-0.872656	-0.965567	-1.78001	0.625432	-1.9992	0.376989	1.89876	-0.783183	0.0804209	0.785787	-1.78706	-0.467112
b0447	ybaO putative LRP-like transcriptional regulator	-1.05482	0.733346	0.693221	0.802594	0.87804	1.24805	-1.46129	0.531187	1.40418	2.15625	1.59477	0.0857893	1.54158	0.429521	0.364308	1.84711	0.747777	0.91613	1.36756	0.823793	1.23398	0.714282	1.70778	2.2799	0.535684	2.14063	1.72846	0.618384	1.25744	-0.312549	-2.56757	-2.338	0.409777	0.582979	0.0879333	1.20025	4.10712	0.367019	-0.606895	0.21021	1.48253	0.156421	-0.822508	1.48835
b0448	mdlA predicted multidrug transporter subunit of ABC superfamily: ATP-binding component	-0.20465	0.722839	-1.40271	-1.37602	-0.149978	-0.0245924	-2.51276	0.0036374	-2.05191	0.539263	0.00774123	0.45691	0.633212	0.165314	0.159707	-0.00927382	-0.658449	-0.779507	0.973445	0.561637	-0.221097	0.219162	1.01684	0.591175	0.214792	0.308048	0.359724	0.243935	-0.163051	-0.327422	-1.46885	-1.29414	-1.04245	-1.63843	-1.07237	0.372471	-3.89099	-0.499868	-2.45823	-0.338272	-1.48791	0.556808	-1.75999	0.895969
b0449	mdlB predicted multidrug transporter subunit of ABC superfamily: ATP-binding component	-0.861338	1.05457	-0.66464	0.890358	0.321988	-0.122986	-2.08409	-1.23238	-0.985088	0.718097	0.611501	0.852188	0.677416	0.358719	0.424239	1.07576	-1.17719	-1.13	0.561553	2.19767	0.691271	-0.319878	0.70488	1.44991	1.38461	0.556363	0.646868	-0.710923	-0.787479	-0.685422	-0.148346	-0.285117	0.181808	0.0949712	1.39848	-0.0556885	-2.11931	-0.687707	1.30959	-0.0465442	-0.112896	1.15255	-0.767461	0.73794
b0450	glnK uridylyl-[GlnK]	0.698173	0.972716	-1.93613	-1.79061	-0.221936	1.27754	-2.64574	-1.35391	-0.458276	0.187521	0.22861	-1.61673	0.0689547	-0.623811	-0.676543	-0.197893	-0.00654848	-0.230171	-1.54176	-0.397133	0.864572	-1.72673	0.556577	0.446749	0.35475	1.18059	0.862859	1.18117	-1.62859	-1.25219	-2.84396	-2.56613	-0.826395	-0.633629	-0.417465	0.642444	-0.327571	0.171676	1.08013	-0.682838	-2.67696	2.06569	-1.34116	1.29666
b0451	amtB ammonium Amt transporter	-0.975489	0.902619	0.419702	-0.175037	0.331409	0.462079	-0.17025	0.835235	-0.3534	0.347047	0.90153	-0.939765	0.859337	0.872519	1.08394	0.959817	-1.70224	-1.42942	-0.602282	-1.93513	-0.288016	0.890449	1.67429	0.293713	1.85917	1.54131	1.5406	1.0387	1.3401	1.49002	-1.60716	-1.58516	-0.144964	-0.406638	0.0365465	1.6745	-1.42017	1.47056	0.400542	-0.143949	-0.632025	1.80812	-0.183743	0.736318
b0452	tesB thioesterase II	-1.28872	0.474004	3.97656	-1.66773	-0.0718443	1.4514	-0.133549	-0.886719	1.76559	2.85467	2.77141	-1.77253	2.53228	0.102328	-0.285202	1.32897	-0.647897	-0.639339	-0.887388	-3.76978	1.29737	-2.05236	1.45976	-0.228066	1.85606	1.69286	2.05676	1.29517	-0.585691	1.33894	-4.419	-3.94064	-0.298163	-3.01777	-2.32361	2.01934	-2.70988	1.49228	-1.18543	0.961965	-1.54204	2.14017	-3.02961	1.62979
b0453	ybaY predicted outer membrane lipoprotein	-1.13752	0.586855	0.462534	-0.743693	-0.189301	0.790661	-1.31235	1.58344	-0.0835875	1.19884	1.12833	0.451969	0.353056	-0.462097	-0.680172	0.493325	-0.67808	-0.95741	1.65265	0.93684	0.127612	-1.24951	1.31805	0.465859	0.248218	0.73605	0.686697	1.21119	0.692479	1.71908	-1.38939	-1.80671	-0.473273	-0.901079	-2.08151	2.04017	-1.03302	2.03542	-0.701257	0.412025	-0.895542	2.20795	-0.788439	0.16384
b0454	atl alkyltransferase-like protein	-0.463239	0.838129	0.219559	-0.638193	-0.452893	0.464541	-1.71137	LQ	0.227285	0.781289	0.285144	1.4883	0.159898	-0.825592	-0.408827	-0.899998	-1.81519	-0.924087	0.329064	-1.7397	-1.59002	-1.41317	0.767324	-0.557597	-0.259603	-0.341591	-0.149725	-0.784463	-0.59592	1.01882	-2.21908	-1.44254	-0.0428131	0.304505	-1.28336	-0.0322642	-2.19236	0.448248	-0.595915	-0.359784	-1.89966	1.30106	-1.05856	-1.10524
b0457	ylaB conserved inner membrane protein	1.72289	0.500222	-1.27621	-1.89703	-0.997714	-0.83695	-2.91064	0.0510096	-1.86672	-2.1587	-0.436689	-1.52337	-1.38082	-0.870338	-0.853555	-0.483491	0.131673	0.138593	0.746959	0.263018	-0.833064	0.0155063	-0.656633	0.729948	-0.890735	0.0380541	-0.109368	0.0462532	-0.164415	0.746501	-0.139844	0.130823	0.0901628	-0.0251413	-0.224505	-0.411536	-1.56268	-1.35446	-0.0374082	-0.149762	0.3204	-0.44342	0.491007	-0.550222
b0458	ylaC predicted inner membrane protein	1.57607	0.539318	-4.06639	-0.557241	-1.39892	0.350969	-3.97758	0.615398	0.326611	-0.327156	-0.973846	-0.433623	-1.52152	0.676356	0.587438	-0.700578	2.49713	1.79851	-2.1346	-2.03452	1.08294	-0.390822	1.11655	1.31192	2.05417	0.0536421	-0.568872	1.53547	1.3796	-3.40264	5.2491	4.34973	0.246014	-1.77293	0.178377	1.37068	-0.196861	2.52486	0.0693292	1.06319	0.776175	0.182162	1.46695	-3.70088
b0462	acrB AcrB RND-type permease	0.739037	0.710235	-0.727243	-0.476399	-1.16768	-0.708113	-3.66378	-1.17829	-1.49684	-0.0318029	-2.71968	-5.8537	-2.89837	-3.38772	-3.00339	-4.03194	-3.74193	-3.22405	-2.7325	-6.469	-3.89987	-1.55879	-2.06671	-1.97008	-5.11194	-4.02325	-3.66966	-3.35434	-6.16946	-4.87641	-6.7115	-5.69018	-3.352	-4.73039	-3.82094	-3.52725	-1.31602	-3.9476	-2.18531	-2.35893	-2.69972	-3.11372	-6.38698	-2.3952
b0463	acrA AcrA Membrane Fusion Protein	0.375674	0.64404	0.839731	0.423719	-0.271558	-0.229998	-2.4267	-1.3976	-2.3466	-0.451858	-1.24028	-2.2186	-1.30564	-1.05664	-1.00689	0.918258	2.02088	2.37363	1.08123	3.6694	1.63001	1.11508	-0.886307	-0.939004	-1.38145	0.355545	1.07516	3.69414	0.182269	-1.88856	-0.187375	0.050034	-2.96999	-1.81353	1.38652	-0.974772	1.12702	-1.36166	-2.45782	-0.776567	7.45621	-2.04344	-3.13202	4.84323
b0464	acrR AcrR transcriptional repressor	1.59397	0.344156	2.03733	-1.37933	-1.28018	-4.2937	0.599879	-2.78288	2.97136	-5.29332	5.06376	3.80144	4.11608	2.83039	1.80784	7.95114	7.98879	8.1202	9.76458	8.25423	10.2355	8.6449	-1.58069	1.67229	9.17784	7.2794	8.58468	10.0445	9.95805	7.49888	7.95975	8.4109	1.22184	0.87879	5.44081	2.2559	6.66684	8.00923	-2.68918	0.440897	11.9299	1.38256	1.92136	12.224
b0465	kefA KefA	-0.0553387	0.603355	-1.60612	LQ	0.577811	LQ	-1.94852	LQ	-1.14481	0.0304449	0.686482	1.28796	1.10134	0.440371	LQ	0.787467	0.631578	0.755166	1.16625	3.24535	0.773758	0.297341	0.719335	0.93117	0.988419	0.00221954	LQ	3.61354	1.69098	0.914527	0.769072	LQ	1.06046	-0.135813	1.7938	0.168833	1.36966	1.62391	0.722527	1.03248	4.79559	-0.424275	-0.612239	3.58724
b0466	ybaM predicted protein	-0.0558098	0.770334	-0.708701	0.473169	0.257556	LQ	0.673819	-0.1691	-0.0210063	0.556196	1.59401	2.81565	0.343286	-0.170778	-0.144893	0.471999	-0.462463	-0.369646	0.344654	-0.7102	-1.1284	-0.867665	0.855094	0.0996118	0.989551	-0.33735	-0.0301698	-0.776053	0.850135	0.389183	-1.05854	-0.887026	0.614999	0.0268084	-0.298498	-0.272008	-1.25982	1.36584	1.50078	1.06917	-1.05626	-0.67035	-0.145869	-0.653384
b0467	priC primosomal replication protein N''	-0.25009	1.04267	0.740589	0.172908	0.675243	-0.550928	-1.62835	-0.106744	-0.762276	1.18784	0.997688	2.19489	0.160139	-0.0469029	-0.0840861	-0.0202601	-1.38518	-0.906837	-1.19182	-1.32077	-2.47389	-0.0620246	0.592853	0.523241	0.82468	0.29848	0.181852	-0.183501	-0.599965	-0.730674	-1.35286	-1.14612	0.452495	1.77061	0.269119	-0.064019	-2.04385	-0.0719697	0.4134	-0.286647	-0.238352	-0.723755	-0.00958673	-0.47035
b0468	ybaN conserved inner membrane protein	-0.765435	0.989903	2.72971	-0.729739	0.175358	-0.00724228	-0.929339	0.56415	-0.0314657	1.1851	0.583037	0.977804	0.489228	0.834109	0.919803	-0.238116	-0.621666	-0.847367	-0.497994	-1.28406	-1.22427	-0.704393	0.348891	1.59898	-0.13426	-0.514447	-0.358672	-0.575004	-0.163196	0.238129	-0.608703	-0.776501	-0.235515	0.836691	-0.974227	1.2029	-1.36541	0.523772	-1.3859	0.529717	-0.678139	0.216909	-0.928555	2.86306
b0469	apt adenine phosphoribosyltransferase	-0.740452	1.05536	1.335	0.903785	-0.0270055	0.962315	-0.682006	0.330872	-0.686702	0.562703	0.136264	2.09305	0.384741	0.230506	0.0229767	1.21489	-1.02969	-1.1493	-1.11907	-1.2113	-0.534703	-0.786955	1.17103	1.51896	-0.634843	-0.267754	-0.427155	1.39728	0.370882	1.01096	-1.30576	-1.77925	-0.118184	0.836341	-0.478853	0.549615	-2.0465	-0.304474	0.781301	-0.494854	2.77907	2.01165	-1.39715	1.60595
b0471	ybaB conserved protein	-0.620962	0.916915	0.59819	-0.0138923	-0.445423	-0.0786859	-0.898391	-0.505963	-0.0793945	-0.441329	-1.28924	-0.128605	0.444127	0.651855	0.377962	-0.0889774	-0.924208	-1.01328	1.71352	-0.656963	-1.7434	-0.814097	0.999574	-0.442982	-0.249943	-0.337989	-0.416865	-0.365615	-0.0691191	0.83138	-1.31775	-1.12549	-0.802834	-0.79375	-1.21591	0.0679463	-1.15073	0.158558	-1.44877	-0.582272	0.083104	-0.361216	-1.03568	0.897685
b0472	recR recombination and repair	-0.711398	0.614054	0.592444	0.547286	0.905124	1.71094	-2.54442	0.298508	0.165167	0.247227	-0.95569	-0.302669	1.34124	0.428748	0.394605	-0.520122	-1.55411	-1.27663	3.07279	-2.4431	-3.33874	-1.67179	0.826857	-0.84456	0.220843	-0.573571	-0.616704	0.353634	0.42858	2.7478	1.27875	1.45917	-1.03401	1.26764	-0.65091	1.10788	-0.421443	-0.620974	-1.91987	-0.148919	-0.0156747	1.96225	-2.32165	0.157104
b0473	htpG HtpG monomer	-0.053781	0.427908	2.51604	4.49701	3.70753	2.7508	2.67512	1.74168	2.31421	2.23582	0.250399	1.15213	0.799315	0.44133	0.325372	0.701835	-1.91858	-2.58421	1.86287	-0.883219	0.410379	1.16317	0.375816	1.96724	0.946563	0.675997	0.50267	-0.691242	1.54351	0.908358	-3.58496	-4.22997	1.01674	0.0594527	-0.132166	0.959064	0.259154	0.173243	1.73252	1.51269	-1.2685	0.144129	-2.21781	2.00248
b0474	adk adenylate kinase	-2.02566	0.636625	0.187176	1.80227	1.75506	1.94578	0.618234	0.705892	1.14013	1.89459	1.68734	0.934198	0.472915	0.879829	1.11742	0.138471	-0.5691	-0.0595477	1.28053	-1.17993	-0.451703	-0.405854	0.819376	-0.354124	0.7001	1.49151	1.69382	0.02461	0.611672	0.793958	-1.46428	-1.36271	-0.158995	0.0252404	-0.671363	0.236672	0.46992	1.63887	-0.754655	0.971217	-0.744284	-0.294057	-0.432015	3.44152
b0475	hemH ferrochelatase	-2.24248	0.580088	2.78483	2.09543	1.65627	2.00781	6.87071	2.03842	1.12852	LQ	0.920384	0.671585	-0.288538	0.693446	0.935335	0.123647	-1.21526	-1.34858	0.678823	-1.22475	-0.787031	-0.921375	1.90227	-1.27501	0.736481	-0.811811	-0.550204	0.835761	0.73501	0.849449	-1.51406	-1.94191	1.20873	-0.185704	1.50134	-0.366316	-1.17528	1.41379	-1.49315	1.12606	-1.113	-0.244899	-0.911736	0.591942
b0476	aes acetyl-esterase	-0.698615	1.36031	0.107793	0.435444	0.413942	0.370686	-0.146946	0.706746	0.52339	-0.266842	0.512867	-0.739033	-0.285877	0.619452	0.638134	0.682828	-1.18365	-1.13253	-0.705575	0.951	0.885577	-0.211059	0.864582	0.50312	0.406559	0.0488491	-0.0497967	0.427769	0.954439	0.066466	-0.826212	-0.795269	0.551623	-0.556316	-0.0367211	0.476078	-0.746555	0.923231	-0.37978	0.436007	-1.54364	-0.143468	-1.19354	0.198038
b0477	gsk guanosine kinase / inosine kinase	0.00573077	0.916507	0.383442	-0.271841	-0.00423074	0.351982	-2.89427	-1.13041	-1.47344	-0.220678	0.0989494	-0.442917	-0.645771	0.124906	-0.0396641	0.311856	0.168331	-0.041639	-1.1464	-2.46744	-0.422027	-1.13168	0.420352	-0.791997	0.200732	-1.19735	-1.18656	0.157165	0.0737127	-0.311856	-2.17835	-2.8219	-0.984639	-1.20124	-0.659166	0.474626	-0.636993	0.447294	0.13278	0.521585	-2.34858	-0.0527413	0.539159	1.93198
b0478	ybaL YbaL CPA2 transporter	-0.577674	1.00356	1.31006	0.393053	0.598187	1.07392	-0.342495	1.2677	-0.577191	0.100697	0.14776	1.19132	0.291471	0.835878	0.996546	0.170193	1.63436	1.95112	0.501994	2.49579	0.62087	0.961109	1.2161	0.934068	0.911475	0.669172	0.71351	0.274342	-0.780549	0.13612	1.1537	1.12902	-0.172513	0.49383	-0.343742	0.0237834	-1.43712	-0.125447	-0.627165	0.899128	1.72779	0.59846	-0.596246	-0.796158
b0479	fsr Fsr fosmidomycin MFS transporter	-0.248711	0.927075	-1.0369	0.103128	-0.247715	-0.988553	-1.30702	-0.525611	-1.58589	0.133037	-0.0757325	-0.61136	-0.0859087	-0.0033853	0.0902801	-0.891902	1.01453	1.13566	0.894379	-2.4862	0.917693	2.41361	0.47889	0.072659	0.46976	0.330054	0.298715	0.410327	-1.56086	0.0134152	-1.98824	-2.02455	-0.097695	2.13572	-0.164362	-0.561589	0.148391	-0.791857	-0.766108	-0.991773	2.21036	0.227092	-0.127061	0.289198
b0480	ushA 5'-nucleotidase / UDP-sugar hydrolase	-0.671992	0.790416	-0.69616	-1.99911	1.20203	0.972581	0.411548	-0.0553777	-0.387771	1.06649	0.75574	0.750547	0.558228	0.940913	0.937917	0.733334	-2.11535	-2.06289	-2.10083	1.69814	1.43128	-0.941338	1.06554	-1.18675	0.849566	0.24707	-0.0322831	1.71392	0.571206	0.501411	0.385171	0.0405068	-0.366333	1.77569	1.71956	1.06882	0.409145	-0.526391	-1.28065	-0.0802313	1.86631	1.09209	1.57864	0.490182
b0481	ybaK Cys-tRNA Pro and Cys-tRNA Cys deacylase	-0.62508	0.73185	-1.92494	-1.182	1.21316	2.57875	3.1685	-1.14606	-0.432555	-0.184389	-0.120398	0.154412	-0.832942	0.390934	0.414834	0.226891	-1.92759	-1.33381	-0.379078	0.486608	-1.64942	-1.44467	1.03719	-0.00335843	0.573471	-0.878087	-0.479847	0.711189	-0.133062	1.64245	-2.05232	-1.51587	-1.10529	-0.0568584	-0.989817	0.188734	-0.406332	0.50018	-0.0479328	0.870663	1.96291	0.975984	-0.373607	-0.464223
b0482	ybaP conserved protein	-0.587523	1.60713	-1.07848	-0.793105	-0.335794	-0.252621	-0.146735	-0.971195	-0.512708	-0.776139	-0.52672	-1.1649	-1.03591	-0.695135	-0.596736	-0.859735	-1.70992	-1.43797	1.41515	-0.120143	-0.364617	-0.775767	0.2147	-0.362583	-0.354685	0.237207	0.216699	-0.493511	-0.222316	0.0727618	0.57232	0.433577	-0.0685996	-0.418126	-1.24471	-0.367384	0.8134	-0.387571	-1.22024	-0.632335	-1.01267	0.677103	0.827057	0.133902
b0483	ybaQ predicted DNA-binding transcriptional regulator	-0.0976726	1.05074	0.344025	-0.459184	-0.617903	LQ	-0.770817	LQ	0.847603	0.106653	-1.14447	-0.333099	0.553888	-0.681139	-0.660717	0.396541	-0.886084	-0.811909	0.0261255	-0.491398	1.73435	-1.07115	0.378238	0.584662	0.349812	0.702789	0.423829	-0.442935	0.499777	0.394203	-0.241007	-0.170612	-0.897397	-0.873606	1.08154	-0.399365	1.63311	0.35136	-0.46453	0.208912	-1.10929	-0.339923	-0.750887	0.220987
b0484	copA Cu +-exporting ATPase	-1.20553	0.768847	-1.25013	1.086	-1.2181	0.138189	-0.482188	-0.691845	0.0255438	0.147535	-0.177557	-0.296472	-0.028847	0.760572	0.746986	-1.71795	-0.706917	-0.572629	-0.412186	-1.79664	0.0706666	-1.78729	2.00645	0.982953	0.196375	-0.495285	-0.825133	-0.314792	0.333063	0.546011	-1.42706	-2.21202	-1.07338	-0.307571	-1.14127	-0.569253	-0.530055	0.64281	-2.35358	-0.107791	-2.26733	1.19994	-1.44067	0.029541
b0486	ybaT YbaT APC transporter	0.200609	0.521303	-0.290829	-0.660976	0.0999071	-1.33236	-4.49502	-0.771903	-2.18197	-2.27937	0.187671	2.48665	0.00543042	0.195194	0.0214162	-0.783202	1.19953	1.09584	-3.09411	3.25115	1.66578	-1.88033	-0.0338871	-0.872783	1.63682	0.0904323	0.138232	-0.155612	-2.93672	0.265206	-3.37045	-2.8848	0.262382	2.95746	-1.94275	0.853615	2.01037	1.09479	-0.534606	1.47324	3.491	-1.02972	-2.30675	-0.0732667
b0487	cueR CueR transcriptional dual regulator	-0.518898	1.08012	-0.646701	0.951242	0.490523	-0.188643	-1.57558	-0.376879	-1.21176	-0.428193	0.42356	2.86392	0.123607	1.25736	1.38524	-0.716007	0.658441	0.628578	-0.260606	-0.455468	-0.85453	-1.36968	0.175679	1.16432	0.76696	-0.608592	-0.418685	-0.313288	-0.744182	-0.571235	-2.10014	-1.83115	0.26129	0.357832	-0.701221	0.132888	0.256924	0.271118	0.487222	0.17138	1.66615	-0.24211	-1.06351	-1.30597
b0488	ybbJ conserved protein	-0.700253	0.725196	-0.413719	1.28667	0.956195	-0.707822	-1.15245	-0.244978	-0.928344	0.550599	0.313927	0.38771	1.20025	0.569589	0.867732	-0.055408	1.91878	2.06646	0.562958	-1.03543	1.18094	-1.01323	1.41412	-0.221029	1.09178	-1.13212	-0.450949	0.587488	0.281815	1.37983	-0.296803	0.0966816	-0.836418	0.136311	-0.0237674	0.201743	-1.2371	1.10409	1.2406	1.23644	-0.779387	-0.0493	-0.883566	0.38059
b0489	qmcA putative protease	0.053384	0.60672	-0.72289	0.249924	1.64394	-0.235743	-3.17549	-0.523655	-0.71723	-1.66093	0.206608	2.09678	0.60111	0.827475	0.941197	-0.9933	-1.36798	-0.818918	-1.39919	-3.25051	1.34772	-1.98987	0.65911	-0.563026	-0.0174931	-1.16958	-0.439102	0.270592	-0.455678	1.13257	-3.88092	-4.03257	-0.77383	0.72117	1.02199	-0.786746	-1.03031	-1.52616	1.9645	-0.436829	-2.58787	-0.115981	-1.50303	-0.380711
b0490	ybbL predicted transporter subunit: ATP-binding component of ABC superfamily	1.32878	0.563083	0.321746	-1.22669	-0.0484567	-0.670008	0.415139	-0.509432	-0.88237	-2.53337	0.490858	2.591	0.854075	-0.024358	-0.222033	1.64901	2.37215	2.01647	-0.545119	-1.17658	0.720741	1.38025	0.351684	0.449681	-0.471624	-0.150124	-0.752671	0.707023	0.552157	-1.21422	-4.70825	-4.61635	-0.762352	0.414173	0.606316	0.175391	2.34817	-0.734793	-0.000929476	-0.287439	1.0095	0.888535	-1.20761	0.762971
b0491	ybbM putative metal resistance protein	1.57628	0.376319	0.866498	-2.42087	-0.998763	-0.176274	1.99763	-2.21471	-4.06374	-4.25734	-0.0531135	0.920376	1.16944	0.546267	0.180811	0.752618	0.995221	0.451683	2.22087	-0.651707	2.65578	-0.612148	-0.0953534	1.0933	-0.614611	0.733422	0.873122	-0.664519	1.42029	1.44739	-8.99692	-8.58661	-0.511873	-1.944	-1.86161	-0.984301	-0.874006	0.409835	-0.233613	0.186173	0.809906	1.05885	-0.254689	1.40297
b0492	ybbN chaperone and weak protein oxidoreductase	-0.373181	0.492823	-0.61059	-2.50198	-0.959098	-0.596515	-1.56692	0.181997	-3.06667	-1.36696	0.964451	3.93308	0.178947	0.538421	0.812479	-2.0821	-3.14538	-1.5952	0.137543	-4.61469	-1.43383	0.0473136	0.862431	1.13106	2.29955	-2.30676	-1.53588	-0.0949136	-1.79744	-0.349581	-2.1226	-2.28799	-0.197295	0.447034	-0.564023	-1.22375	-2.56284	0.819953	-0.644429	2.93112	-0.879699	-0.149672	-1.77535	-1.49335
b0494	tesA TAP complex	-0.778511	0.584989	0.0427306	-1.01378	-0.163254	1.27423	2.26753	-0.328442	-1.41855	-1.34056	0.43761	-1.51005	0.840127	0.857649	1.02184	0.95384	3.19368	2.6946	1.62658	0.5622	1.83509	-0.617426	2.4323	0.809293	1.54538	-2.24756	-2.02488	-0.250474	-1.68114	0.7663	-4.12452	-4.01529	-0.210206	-3.03291	-1.16307	-0.193801	-3.75909	-0.362901	-1.53114	-1.70817	-3.70794	2.19116	-1.11437	2.42472
b0495	ybbA YbbA/YbbP ABC transporter	-0.52024	0.558452	-1.193	-1.51695	-0.527824	0.825302	0.602034	0.243524	-2.44966	0.209845	0.964617	-1.27958	0.573913	1.1431	1.33406	-0.11602	0.545992	1.08912	0.413162	-1.10318	-3.3699	-2.77093	0.885101	-1.09884	0.129752	0.655421	0.290281	-0.805007	-1.36297	1.15076	-4.10831	-4.86753	-1.68411	-2.99559	1.21674	-1.32377	-5.42532	-1.3267	-0.386844	-0.142212	-4.40729	0.486598	-0.831588	3.31395
b0497	rhsD RhsD protein in rhs element	0.871458	0.420267	0.979102	-0.823696	2.11727	-0.656649	1.09353	0.329086	5.58192	-1.09961	2.49535	0.35166	2.55378	-0.0627567	-1.13923	3.55107	1.12746	-0.78353	0.586844	1.02925	4.65921	0.167685	0.26464	-0.590336	0.484601	0.515156	0.784297	5.31007	1.50257	1.31264	-0.354389	-0.0886015	4.75922	-0.656887	2.75247	0.510875	-0.489796	0.797095	0.0912181	0.335507	1.87098	2.72051	2.30281	5.33123
b0499	ylbH conserved protein, rhs-like	2.84026	0.648592	-2.03632	-1.99423	-2.70505	-1.94139	-3.68241	-0.970495	-4.78547	-5.76639	-1.73085	-0.455294	-1.62594	-1.47854	-1.17625	-1.14939	-0.636649	-0.117149	-0.525202	-0.00270928	-2.05155	-0.774246	-1.83252	-0.281153	-1.33984	-0.858959	-0.290265	-0.887501	0.346411	-1.10296	-0.380357	0.181404	-0.780216	-1.29056	-2.23375	-0.26463	0.0266465	-1.03068	0.0547186	-1.95437	1.50477	-0.618696	0.0336709	-1.25456
b0501	b0501	0.243322	0.241918	-2.00925	LQ	-1.14015	-0.813543	-1.9211	LQ	0.212618	-0.137926	1.41039	1.22822	0.482757	0.649777	0.157382	-0.939974	2.37483	0.46601	2.34674	3.12809	-2.03413	1.41308	0.143723	-0.151829	0.355882	0.173746	0.0889041	0.501991	1.51432	1.15319	0.35126	-0.239932	-2.21126	0.108164	-0.392591	0.512419	0.261857	2.10847	-0.821334	0.0370081	-2.07752	-1.95469	0.778829	0.438901
b0502	ylbG predicted DNA-binding transcriptional regulator	-0.195572	0.723433	0.423412	-0.130088	-1.12783	0.345947	-0.0492183	LQ	-0.493086	-0.917664	0.433913	-0.176702	1.05029	-0.209133	0.182983	-0.50635	0.529414	0.810884	-0.308684	3.75968	-0.913882	0.00125749	0.643337	1.72053	0.466166	-0.434254	0.0511129	0.217073	0.0458004	0.46511	-1.36795	-0.49006	-0.408418	2.08645	-1.20061	1.43985	3.71305	0.144097	0.609339	-0.750527	-1.62319	-0.0756681	0.441536	0.107444
b0503	ybbB tRNA 2-selenouridine synthase	0.100013	0.756437	0.827659	0.28725	-0.992798	-0.912845	-3.41043	0.321726	-2.61231	-2.29291	-0.0917599	0.30978	-0.78696	-0.387187	-0.248853	-1.67785	0.591681	0.595932	0.290927	-1.30343	-1.92617	-2.59183	0.313735	-2.07634	0.630411	-0.671962	-0.102511	-0.281726	0.669065	-0.415368	-2.98481	-2.83323	0.0668585	0.778461	-0.228881	-1.05797	-3.45032	-0.240941	0.147937	-0.48969	-2.19454	-0.958951	-1.93131	-0.425043
b0504	allS AllS transcriptional activator	-0.334868	1.00826	-0.156474	-0.807132	-0.161041	-1.07537	-0.690128	-0.407499	-1.47744	-0.664019	0.165108	-1.11423	-0.619913	0.666259	0.416946	-1.12565	0.206068	0.237423	-1.07238	-2.41229	-1.12371	-2.51834	-0.255183	0.186203	-0.34157	-0.60972	-0.569105	-0.288678	-0.267649	-0.882079	1.126	1.39118	-1.0066	0.845318	0.725412	-0.178615	-2.24257	-0.453258	-0.977148	-0.328919	0.00643266	-0.0762056	-1.4532	1.00356
b0505	allA ureidoglycolate hydrolase	-0.354699	0.702462	0.710757	-0.162132	-0.303705	0.113891	-2.28819	-0.0336254	-0.623205	-0.357771	0.317498	-0.159204	-1.5251	-0.00130521	-0.123759	-1.43741	1.616	1.44093	-0.779173	-2.14069	-1.80001	-1.47709	-0.935843	0.327791	-0.0178361	0.417309	0.416506	-1.44735	0.262253	-0.440532	-2.18809	-1.66798	-1.64156	-1.21015	1.90913	-1.31295	0.929173	-0.0589434	-2.39917	-1.2044	1.97003	-1.98198	-1.38301	-0.832878
b0506	allR AllR transcriptional repressor	-0.473421	0.830343	0.389462	1.80372	-0.55822	0.123781	-2.20995	2.15194	-1.4736	-0.781069	0.913902	-1.28352	0.316429	0.159821	0.254527	-1.19587	-0.787274	-0.495974	1.01028	-3.28223	1.73171	1.90489	0.0587419	-1.23821	0.828504	-0.125178	-0.0501858	-0.829407	-0.194694	-0.598313	-2.57411	LQ	-0.964984	0.550243	-0.873115	-0.83176	-2.70713	-0.0217232	-3.10101	1.51566	-2.85135	0.0239991	-2.3005	0.763486
b0507	gcl glyoxylate carboligase	-0.118387	0.478355	-0.288593	-0.50339	-0.087494	1.3203	-2.23411	-1.47406	-3.73049	-2.47994	1.01037	0.671833	0.870839	2.28128	2.0126	1.25896	-0.899103	-0.487189	0.0468421	-1.99351	0.755454	-1.13863	1.82812	1.86813	0.602999	0.240729	0.330926	0.944124	0.0414123	0.882926	1.41784	1.06433	-1.16773	0.126012	-0.0616686	1.01907	0.205973	-0.231028	1.37663	0.427643	-4.00791	2.01786	-3.0684	3.7445
b0508	hyi hydroxypyruvate isomerase	1.69767	0.477236	1.14273	-1.49287	-0.929109	0.381881	0.936703	-1.03348	-2.83297	-5.82091	1.06031	-2.05062	2.41616	-0.0931652	-0.00435171	1.23702	-2.62634	-1.98955	-0.28246	0.550333	1.78528	1.53102	0.523011	1.09367	-0.851186	-0.58453	0.148403	-0.11911	-1.61229	0.863456	-2.03251	-1.44254	-0.577799	0.824386	-0.729376	0.397367	2.21868	0.137195	1.34192	-1.54553	-1.39151	3.11968	-1.24099	2.72441
b0509	glxR tartronate semialdehyde reductase 2	1.68099	0.348281	1.40497	-0.840187	-1.86857	0.299489	-1.1485	-2.03926	-6.42586	-9.65624	0.768116	-1.78861	0.82139	1.10674	0.87314	-0.229091	0.043746	0.405977	0.678994	2.88397	-1.34829	0.808025	0.480518	0.17343	-1.71006	-0.550523	0.385956	-1.28047	0.414029	1.65516	0.183615	0.0302139	-2.39822	-1.46331	-0.858299	1.44801	2.55037	0.626058	1.01386	1.00292	-5.39718	1.11988	-3.15605	1.48957
b0510	ybbV predicted protein	0.949396	0.650107	-1.11245	LQ	0.271034	LQ	-1.18268	LQ	-0.540846	-1.28138	0.731353	0.102776	-0.150769	-0.521998	-0.714788	0.264082	0.153967	LQ	-0.683611	-1.77174	-1.43795	-0.136224	-0.46671	0.718207	-0.681485	0.0905884	-0.177171	0.246305	-0.220252	-0.475666	-1.28116	-1.43514	0.887392	-0.414693	-0.621057	-0.528516	0.0935496	-0.0538315	-0.916324	0.134426	-0.148586	0.111179	0.409459	-0.909896
b0511	ybbW YbbW NCS1 Transporter	2.52272	0.457755	1.09644	-1.33477	-0.765619	-0.980621	1.4125	0.113398	-2.04775	-3.62136	0.875397	-0.589753	0.321864	-0.440641	-0.235858	0.768013	0.275561	0.434337	-0.021704	0.0628989	0.916668	0.736746	0.436826	-0.202834	0.0974632	-0.247804	0.13333	0.647847	0.563013	-0.501256	-0.612114	0.181212	0.93755	-1.11613	0.06955	0.627646	0.471714	0.648923	-0.558924	0.0629361	1.47136	2.22153	-0.0477501	0.237927
b0512	allB allantoinase	0.181047	0.622015	-2.03074	-1.56093	-0.820176	0.704373	-0.225097	-0.865134	-1.48966	-2.09281	0.541804	-1.62758	0.609326	-0.477557	-0.103817	0.260743	-0.554558	-0.144166	0.357921	0.639158	2.19733	-0.123031	1.04699	1.74253	0.158573	-0.370239	-0.0170723	0.645377	-0.466985	-0.449965	-1.49504	-0.863425	-0.242492	1.07635	1.05699	-0.0248077	-1.7855	0.246514	-0.990551	1.77669	-1.16908	-0.601329	1.61281	2.19893
b0513	ybbY predicted uracil/xanthine transporter	1.48008	0.492256	0.132105	0.412777	-1.40003	-0.791059	-0.376177	-2.0346	-2.55563	-4.05414	-0.156425	-0.986855	0.456404	1.15733	1.25823	0.362975	-0.758131	-0.887154	-1.25576	-0.0866387	2.34561	-0.308639	1.07298	-0.70401	0.468527	0.517197	0.664613	2.23717	0.342087	2.95875	1.60599	2.12917	-1.98837	-0.402852	-0.442908	0.792138	0.450867	-0.642845	0.797353	0.522054	4.49269	0.0290679	-3.13429	4.46498
b0514	glxK glycerate kinase II	0.7075	0.712135	-0.43298	0.325746	-0.642149	0.512122	1.36238	0.317857	-2.71988	-2.82016	0.499284	0.0513184	0.0452438	0.532422	0.987721	0.0421019	1.09241	1.37961	0.418011	-2.29117	-0.105287	-1.39433	0.637988	0.481204	0.594159	-0.298865	0.207216	-0.0680018	0.607877	0.551066	-2.60289	-1.5906	-0.630372	1.08266	-0.458713	0.37987	-0.265086	0.294996	-2.70895	-0.860936	1.50437	1.0709	-1.81588	0.326945
b0515	ylbA conserved protein	2.95992	0.491804	-1.0831	-0.189934	-1.48852	-0.319855	-0.301202	0.95324	-4.10956	-4.65607	-0.382938	-1.16211	0.0854125	-0.406735	-0.378141	0.576143	-0.125667	0.031795	0.109648	0.562555	0.826578	-0.215446	0.288478	0.225617	-0.869708	0.404388	0.32912	0.285962	0.851538	0.369964	1.58283	1.78883	0.28095	-1.0365	-1.29445	0.196989	1.3165	0.322461	0.845145	-0.130082	1.11891	1.25865	0.781352	0.658807
b0516	allC allantoate amidohydrolase subunit	2.14697	0.244383	0.853609	-0.368391	-1.30952	-1.81253	-5.91461	-2.76481	-10.7199	-6.27682	0.605538	0.383891	-1.39081	-0.617076	0.739142	0.355369	0.842131	2.39256	0.0379606	1.08633	3.53151	-0.295575	-0.00756846	-1.23631	-0.707776	0.204681	1.34051	-0.653399	-1.4614	-3.11681	-1.1196	1.08547	1.29321	-0.353406	0.844143	-0.662677	-3.48167	-1.40447	0.212338	-0.559802	-1.50124	2.57767	-0.233744	0.860998
b0518	fdrA involved in protein transport; multicopy suppressor of dominant negative ftsH mutants	0.753636	0.553226	0.0451087	0.01067	-0.928522	-2.6414	-2.12782	0.431811	-4.87263	-0.666385	0.31291	-0.509953	-0.060475	0.567279	0.838331	-1.2358	0.956127	0.978749	-1.4387	0.524039	-1.71851	-0.673639	-0.541132	0.294526	0.414909	-1.08573	-0.538558	-0.0848853	-1.46584	-0.612169	0.43601	0.895697	0.068653	0.518553	1.27615	-0.790691	2.76623	-1.84907	-1.86334	-0.859729	0.378215	-1.48153	0.883305	0.179003
b0519	ylbE	-0.66311	0.661227	-0.524394	-0.793881	-0.288344	-0.194139	-2.18199	-0.487749	-2.48619	-0.28708	1.18717	0.618893	0.913104	1.12678	1.09759	-2.47043	-0.187138	0.316544	1.46936	-1.0423	-3.22739	-1.6003	1.20129	-0.178639	1.94249	-0.518164	-0.380931	-0.0725688	-0.963304	0.960243	-2.7952	-1.8159	-0.0996237	-1.05317	0.630023	1.26951	0.180644	-0.170451	-1.93146	1.62465	1.91892	-0.191034	1.53774	0.877412
b0520	ylbF conserved protein	-1.01018	0.862468	1.33119	-0.737895	0.42505	0.574332	0.615716	0.831371	0.0571863	0.156136	1.89128	-0.0543349	0.603071	1.17587	1.16312	1.09295	-1.47879	-1.15502	0.559742	0.190369	-0.115839	-0.185047	0.637071	-1.66544	0.668693	1.00379	0.860433	0.0355215	-1.29474	1.22409	0.0318514	0.516883	-0.0133915	0.741492	1.63965	0.461481	-0.668301	0.134678	-1.30063	0.0784463	-2.01863	-0.20238	-0.645208	0.879059
b0522	purK N5-carboxyaminoimidazole ribonucleotide synthase monomer	-2.71601	0.730031	0.48955	0.869756	0.871481	0.872186	0.485656	-0.153512	0.126267	2.20734	0.445226	0.531364	0.491335	2.08141	2.24756	0.0862853	-0.368398	-0.0368669	1.2424	-0.74993	-0.168692	-0.75022	1.03817	-0.78193	0.790179	-0.0537729	0.155327	1.70544	0.967472	1.9332	0.924777	0.969144	-0.0230824	-0.506743	-0.906446	-0.536398	-0.258499	2.26657	-0.474549	0.345655	3.05591	0.190269	3.39465	1.17019
b0523	purE N5-carboxyaminoimidazole ribonucleotide mutase	-2.82275	0.44284	2.04582	1.16329	0.563034	0.0844296	1.16219	1.00563	1.14487	1.36183	2.10095	2.25431	3.25943	1.55514	1.13771	0.987519	0.653054	-0.0738973	5.637	0.170916	0.866289	1.18676	1.57367	-0.581145	2.24192	-0.0513993	0.312743	3.16847	3.11853	2.97078	-0.46053	-0.732166	2.15852	0.90968	-0.288606	0.0313858	0.467562	2.80788	0.00105956	1.43567	0.161296	0.717996	1.51773	1.82682
b0524	lpxH UDP-2,3-diacylglucosamine hydrolase	-2.12689	0.745868	-0.32463	0.651721	-0.411329	0.508697	-0.462194	1.09132	0.00389025	0.537206	0.110592	0.744622	-0.42953	-0.112756	0.768456	-0.656229	-0.669928	0.352821	0.480202	-0.143227	-0.914152	-0.35451	0.647572	-0.375001	1.50999	-0.141329	0.275021	0.863235	2.18926	0.824411	-1.02032	-0.33043	0.512837	-0.105452	-1.26175	-0.365876	-0.720454	1.05595	-0.0959634	0.290955	-0.302692	-0.552483	0.216547	0.268235
b0527	ybcI conserved inner membrane protein	-0.0878895	1.11234	-1.32092	-0.883163	-0.528361	-0.598347	-1.54603	0.101052	-1.01281	-0.497024	-0.950326	-0.792899	-0.624876	-0.895458	-0.886478	-0.970526	1.1245	0.887367	-1.38976	-1.36702	1.16285	-1.0622	0.147775	-0.825424	0.986867	0.0127881	-0.190736	0.0870887	-1.04744	1.07051	-1.99807	-1.87853	-0.868154	0.875865	-0.110431	-0.775135	0.222344	-0.61927	1.17519	0.0251966	2.55108	0.941058	-1.72434	-0.473541
b0528	ybcJ predicted RNA-binding protein	-0.893387	0.293951	-1.10997	0.905814	0.0411009	0.581153	-0.939381	1.52441	-0.433423	0.904386	0.101807	2.42739	1.41915	1.12777	1.30403	1.6856	2.0918	2.56647	1.93392	-0.530596	-0.480861	-0.433626	1.95527	-1.13338	3.90645	-0.400042	0.7332	0.689245	2.36175	2.704	-1.94146	-0.973621	-2.10548	0.125107	-0.89774	0.50124	-1.11272	3.51235	-1.31288	2.98107	-0.0936066	-0.155059	-0.245028	1.28347
b0529	folD methyleneTHF enzyme	-1.30004	0.572408	-0.703541	1.02008	-0.517772	0.333354	0.347469	1.5274	-1.64457	-1.03996	0.0673005	-0.00393085	0.879854	0.943549	1.72131	-0.124008	0.879922	1.82632	-0.226706	-1.55573	-1.06159	-0.32058	0.43772	-1.05092	0.357188	-0.0144023	0.920754	1.03021	0.304786	1.30635	-0.260312	0.655933	-0.834306	0.71932	0.10436	0.612191	0.678652	0.894662	-1.00895	0.676585	-0.602734	-0.207455	0.141789	2.35853
b0530	sfmA predicted fimbrial-like adhesin protein	2.87887	0.521515	-1.91427	-1.43793	-0.784364	-2.97025	0.00145566	-0.865735	-7.69928	-5.43206	0.126036	-1.40698	-0.251214	-0.532137	-0.539984	0.328671	-0.853244	-0.38825	-0.912164	-0.182982	-1.24321	0.425754	-1.34391	-0.615662	-0.415102	-0.15983	0.100382	0.497324	0.207784	-0.587076	1.50345	1.65962	1.54706	-0.0394023	0.877791	-0.695567	-0.360449	-1.34359	-0.344956	-0.770626	1.27992	0.247179	0.91357	0.667814
b0532	sfmD putative outer membrane protein, export function	3.52021	0.398833	-3.62253	-2.38686	-4.32333	-3.49402	-5.99701	-1.09113	-6.65759	-7.21081	-2.85894	0.93975	-3.54438	-0.90729	-1.93448	-3.43275	-0.923753	-2.24689	0.749443	-4.31891	-3.84607	0.616651	-1.59456	0.245559	0.194434	-0.829903	-0.448048	-3.99619	-0.967186	-1.21699	-1.47459	-1.21393	-2.95775	0.941788	-3.69835	-0.493685	0.0664867	-1.84754	-0.0813565	-0.956067	2.02677	-4.19694	-1.26528	-2.20804
b0533	sfmH predicted fimbrial-like adhesin protein	1.86928	0.330905	0.327163	-2.39545	-1.39602	-1.29342	-4.06796	-1.01525	-0.42989	-4.31711	1.87662	0.631092	3.50578	1.02819	0.904157	1.80906	-0.625635	-0.514103	0.504195	1.50592	1.84382	0.0703694	1.12667	1.1468	1.24978	0.185976	0.167966	0.834924	-0.195896	-0.19776	0.690607	0.592537	0.00244442	-1.03533	0.29145	0.281308	-0.487992	-1.055	-2.00088	0.240189	-0.789801	3.43934	1.77991	4.55969
b0535	fimZ FimZ transcriptional regulator	1.22439	0.461431	-0.819237	-1.79782	-0.902168	LQ	-4.57655	LQ	0.867059	-2.69367	0.310095	-2.34483	0.336536	-1.01915	-1.30812	0.30328	1.8408	0.68797	0.446805	-0.453946	2.13367	0.527004	0.420525	LQ	-0.212903	1.02071	0.0947097	0.00344189	-0.461162	-0.0671907	-3.17803	LQ	-0.107605	-0.211702	-0.722198	-0.0435292	0.0286524	-0.32202	-2.44184	-0.574858	-0.988586	1.56823	1.07449	2.2291
b0537	intD DLP12 prophage; predicted integrase	1.61006	0.754089	-0.46544	-0.336621	-0.302542	-2.29125	-4.74901	-1.21902	-3.77811	-3.44233	-0.608396	-0.4645	-1.24002	-1.27604	-1.60772	-1.11532	-1.16291	-1.19082	-0.71407	-3.67131	-1.51084	-2.26149	-1.45986	-0.341342	0.327059	-0.201648	-0.333771	-0.811084	-0.278415	-2.00078	-0.610512	-0.118533	1.48464	1.64974	0.812389	-1.02054	-3.03595	-1.17197	-2.96709	-0.0960113	0.44724	-2.96902	-0.757309	-1.26285
b0538	b0538 DLP12 prophage; putative sensory transduction regulator	0.45893	0.559081	1.13639	LQ	-1.20453	LQ	-1.51967	LQ	-1.77874	-1.82548	0.463361	-2.55008	1.90151	-0.663357	-0.581491	0.968952	0.0817099	0.683152	3.09747	-3.91889	-1.03087	0.47656	1.8047	0.00486747	-1.60292	0.366319	0.350777	0.183515	-1.52328	1.75208	-0.345269	LQ	-0.484165	-1.02284	-0.92294	1.55748	-3.61068	-0.218968	-1.86063	-1.18715	-3.93428	0.276716	-2.11233	1.1968
b0539	ybcC DLP12 prophage; predicted exonuclease	0.228193	0.62017	0.66865	LQ	-0.427274	LQ	-1.21899	LQ	-0.244684	-0.193787	0.658647	-0.360064	1.19856	-0.0946296	LQ	1.17346	-1.08243	LQ	1.90134	-2.46711	-0.74062	1.01161	1.67059	0.417731	-0.445251	0.478847	0.58586	0.0910047	-0.154696	2.33984	-1.93989	-1.57842	-0.501437	-1.17546	-0.506299	0.698161	-2.22314	0.789601	-0.801418	-0.0481154	-2.33344	0.0180886	-1.67209	0.454433
b0540	insE-3 IS3 element protein InsE	1.164	0.372572	-2.02281	-3.22446	-2.65925	-2.94594	-1.98991	-2.22545	-3.84715	-4.12423	-1.79866	0.380473	-1.63397	-1.27429	-2.35828	-2.33338	1.02736	-0.0686567	1.74059	1.84907	-1.87833	0.0359452	-2.08888	0.179883	-1.52077	-0.315779	-1.2052	-1.96516	-1.12223	-1.9297	-6.33793	-5.31385	0.402602	-0.656867	-2.12761	-0.565219	0.847594	-0.133308	0.468215	0.245844	-5.37044	-3.36697	-2.17882	-0.364426
b0541	insF-3 IS3 element protein InsF	0.487823	0.434292	0.424317	0.279848	-1.16392	0.0781367	-0.645962	0.576155	-3.87881	-3.40591	0.565151	0.277126	0.955589	0.548838	0.932227	0.917211	1.62675	1.91613	1.09708	2.32653	-0.38706	0.0693488	0.572649	-0.425091	0.679876	0.762203	1.20869	-0.204319	0.279778	0.347782	-0.138746	0.399763	-0.540074	0.604965	-0.162541	0.0922101	0.359002	0.234287	-0.608681	0.378258	0.0454541	2.34537	-0.24799	1.31828
b0542	renD DLP12 prophage; predicted protein	0.420454	0.2592	-0.113658	LQ	-1.00514	LQ	-1.70069	LQ	-0.717827	-1.04097	5.09992	0.964574	4.1671	-1.54303	-0.33528	1.45971	-1.39189	-0.543742	2.24675	0.0217044	1.0938	-0.415967	1.1976	LQ	1.83851	0.147485	LQ	0.504496	2.67567	1.88183	-0.799927	LQ	-0.320208	-0.336458	-0.884598	LQ	-0.235468	1.96248	LQ	0.778968	0.164039	1.15948	LQ	2.56872
b0544	ybcK DLP12 prophage; predicted recombinase	1.2516	0.551744	-1.46501	-2.11899	-1.77188	-2.59491	-2.18578	-1.16386	-1.07483	-2.70925	-1.1793	-1.19421	-2.23982	-0.745572	-0.0754383	-0.911956	-0.730723	-1.23497	-0.977332	-0.0453043	-1.17679	0.963722	-2.49488	-1.35222	-1.61341	0.603873	0.577055	0.059868	0.451178	-1.34963	1.83745	1.54424	1.32439	0.207974	0.813361	-0.54909	1.10284	-1.40491	0.426961	-1.4799	1.70332	-3.18596	2.08582	-0.560423
b0545	ybcL DLP12 prophage; predicted kinase inhibitor	2.55494	0.474005	0.760409	-1.064	-2.17755	LQ	-1.71173	-0.724914	-5.37625	-6.64266	-0.663548	-0.346881	-1.95629	-0.213111	-1.13324	-0.669262	0.454068	-0.397192	0.342217	-1.50683	1.42029	1.08468	-1.53697	-1.28586	0.0417605	0.302904	-0.51437	-0.916162	1.2054	0.638826	-2.79419	-2.8965	0.730121	-0.0963739	-0.359019	-0.58992	-0.160413	0.690163	0.262255	0.568048	0.970448	-0.152693	1.13515	-0.614445
b0546	ybcM DLP12 prophage; predicted DNA-binding transcriptional regulator	1.60801	0.46162	-2.90436	LQ	-0.679073	-1.48677	-0.38856	LQ	1.59024	-2.89951	0.813516	-2.23018	0.954161	0.469802	-0.458624	0.120838	1.79108	0.830592	-2.20953	-1.44246	-1.12246	0.50432	-0.657908	1.76453	-1.31034	0.386916	-0.417618	2.83724	-0.0692041	-1.04926	3.43239	1.96495	1.39211	-0.0167832	1.57242	1.17009	2.71099	-0.867796	1.96723	-1.43694	4.29497	-0.425007	3.20833	1.7769
b0547	ybcN DLP12 prophage; predicted protein	1.18863	0.547649	-1.20406	-1.8124	-1.10667	-0.255754	-2.74024	1.36268	-1.19989	-2.18187	0.705948	-2.41905	-0.240841	0.505423	-0.357372	0.559065	-0.678335	-0.594491	1.12697	-3.87647	-1.3681	-0.399902	-0.129914	-0.110679	0.477235	-0.934096	-0.931959	0.888878	-0.383516	-1.97534	0.00666253	-0.845567	1.11804	-0.0266518	-0.848818	0.592986	1.36673	-0.85555	0.391801	-0.633246	-3.52482	-0.194342	-0.305399	-1.05051
b0548	ninE DLP12 prophage, conserved protein similar to phage 82 and lambda proteins	0.546822	0.651214	-0.240427	LQ	-1.09796	LQ	0.810964	LQ	-0.128955	0.156451	-0.745142	0.212052	-0.397034	-0.485093	LQ	0.570787	-1.13629	LQ	2.05459	-1.64875	0.299919	-0.338153	-0.193173	-0.184513	-0.266355	0.071016	-0.0937773	-0.956195	0.41149	0.137304	-1.99362	LQ	-0.848086	-1.01843	-1.55147	-0.431951	LQ	2.86426	-0.874819	-0.38513	LQ	0.539163	-0.88854	2.04936
b0549	ybcO DLP12 prophage; predicted protein	-0.0698825	0.500959	0.102787	-0.34825	LQ	0.745654	-0.645543	1.0123	LQ	-0.0528596	1.04944	1.93392	-0.678121	0.604491	1.03691	1.6652	2.09486	1.99997	2.32106	3.91759	-1.02803	-1.04258	-0.0660399	-0.235861	3.33778	-0.304125	0.322166	LQ	0.286479	2.74881	-2.25461	-0.915607	LQ	-0.608741	LQ	1.05671	-1.02144	1.90315	1.26781	1.11394	-1.5939	0.145714	-1.05302	-0.615267
b0550	rusA endodeoxyribonuclease RUS (Holliday junction resolvase)	0.426173	0.507551	1.13443	-1.75696	-0.908568	-0.547177	1.02126	-0.825535	-2.17543	-0.598301	0.714011	0.0582839	-0.826708	1.42827	1.45423	0.90268	1.27151	1.15284	-0.424571	0.163042	0.935325	0.377424	0.689644	0.778633	0.075057	0.337628	0.529723	0.157106	0.711691	1.45865	1.01708	1.36033	0.0564813	-0.675819	-0.929324	0.581256	0.56926	0.270633	0.342941	0.0538605	1.02875	-0.861698	-1.67816	1.503
b0551	ybcQ Antitermination protein Q-like protein	1.55278	0.366072	-0.0840522	-0.597325	-1.00999	-1.39497	0.87957	0.100729	-2.13865	-2.91852	-0.71695	-2.1715	1.16409	-0.853641	-1.02439	0.351107	0.293158	-0.0848376	1.33922	0.978362	0.540941	1.61229	1.11448	0.373983	1.20137	0.607387	1.17149	0.957021	0.100873	0.493781	3.31737	2.86661	0.228316	0.0498463	-1.29209	0.442468	2.16416	0.452649	0.633216	-0.69103	0.490737	0.0305582	0.809533	1.15775
b0552	insH-2 IS5 transposase and trans-activator	0.528348	0.510284	-0.236454	-0.822144	-1.24849	-0.605338	0.354726	-1.4866	-2.82105	-2.33473	-1.03671	0.0263919	-0.633721	1.58956	1.20417	0.0489719	1.65991	1.29068	0.68	0.167173	1.24015	-0.10014	0.362476	0.159535	-1.32816	0.608544	0.87296	-0.885319	1.07857	-0.205557	0.166373	-0.232193	-1.05687	-0.56366	-1.0143	-0.312752	0.0314347	-0.149412	0.750094	-0.424132	0.690036	-0.0870136	-0.297774	0.837297
b0553	nmpC outer membrane porin protein; locus of qsr prophage	2.34621	0.429368	-1.07145	-0.977359	-1.54487	-1.89142	-2.21532	LQ	-2.41342	-3.61	-0.790574	0.648042	-1.47278	-1.69114	-1.94345	0.0865023	-2.56952	-0.694425	-1.26163	-1.09003	0.489058	0.200159	-1.30689	-1.58244	0.367563	0.142894	-0.407728	-0.389389	-2.03549	-1.97185	2.30662	1.77521	0.477159	0.520122	-0.327701	-1.06337	0.495754	-0.613426	0.799588	-0.921081	0.0126544	-1.50859	1.31334	-0.401226
b0554	essD DLP12 prophage; predicted phage lysis protein	1.01299	0.385558	0.62157	0.144255	0.375081	0.127536	2.3097	0.300519	1.78384	-0.0834469	0.731666	0.682025	2.51804	-0.415229	-0.291939	0.523513	-0.720839	-1.19548	0.688703	-1.0611	1.03717	-0.961382	1.16225	-1.46961	1.46851	-0.0920732	-0.262115	-0.686464	0.651521	1.25338	-0.798825	-1.02793	-0.000420437	-0.953428	-0.587517	-0.542971	0.715002	1.971	0.340448	0.181039	1.5718	3.62605	0.00855915	2.21209
b0555	ybcS DLP12 prophage; lysozyme	2.57961	0.394604	-0.210957	-0.0535961	-2.15846	0.0176332	-0.957746	-1.56767	-4.58777	-3.57439	-0.838116	-0.449012	-0.364578	0.0471088	-0.570486	0.660527	1.08918	0.37087	-1.46229	-0.947108	-1.72158	-0.425124	-0.244328	-1.1298	-0.518632	-0.705376	-0.778721	-0.402193	2.76654	0.386311	-0.887062	-1.34955	-0.468549	-0.584747	-1.64667	0.0574474	0.985817	-0.0525197	-1.69574	-0.458368	0.611065	2.62055	-3.05651	-0.570032
b0556	rzpD DLP12 prophage; predicted murein endopeptidase	1.71361	0.384586	-0.662222	-1.11352	-1.34305	-2.52063	-2.46525	-0.933724	-5.0384	-5.59357	-0.63993	-0.777297	-0.448613	-0.0724034	-0.455469	0.691103	-3.87216	-3.00633	-0.754525	-0.668001	1.1779	-1.21036	-1.60975	-0.489527	-0.527405	0.0593419	-0.026419	-1.34005	-0.987028	-0.117116	-2.56055	-2.82958	0.913478	-3.03797	-0.362778	-1.61228	1.74051	0.518224	-1.71494	-2.45486	-5.34341	-0.496793	-2.82613	1.44883
b0557	borD bacteriophage lambda Bor protein homolog	1.76266	0.533003	0.842244	LQ	-1.57649	LQ	-1.40367	LQ	-1.88627	-3.36358	0.97017	0.754196	0.488353	-0.180631	-0.481185	0.393926	-0.0547388	-0.310584	0.00710524	-1.14452	0.623385	0.654244	-0.204293	-0.553319	1.40589	0.579288	0.264635	-0.67638	2.06848	0.356794	0.464589	-0.306789	-0.17978	-0.533335	-1.38549	-0.302289	-0.663801	1.63891	-0.919526	0.989584	2.53748	0.331556	-0.824136	-0.0610204
b0558	ybcV DLP12 prophage; predicted protein	1.27483	0.634693	-2.25188	LQ	-1.13328	LQ	-1.61314	LQ	-0.879457	-1.63294	0.0955635	0.511399	1.72843	0.212678	LQ	-0.416397	1.92527	LQ	-0.578203	0.161854	-0.300039	0.100987	0.172142	LQ	-0.846936	0.418171	LQ	-0.0214478	-0.582971	-0.736833	1.92174	LQ	-1.30115	-0.288929	0.136378	0.0267157	0.108811	0.602226	-1.28842	-0.554953	-0.606183	-2.00925	0.448515	0.889233
b0560	nohB DLP12 prophage; DNA packaging protein	-0.934998	0.69237	-0.892607	-0.176246	-1.01494	0.358142	-1.36501	1.23288	-0.996344	-1.50293	0.681534	-0.487998	0.937704	0.546055	0.754111	1.08996	-0.783313	0.12682	-0.585147	1.77086	-0.614541	0.374342	0.558438	-0.471769	0.166243	-0.946883	-0.0645324	0.274737	2.477	0.523497	-0.629812	0.211902	-0.934772	-1.32086	-0.499108	1.64187	-0.479066	0.154934	1.03094	-0.0830663	-1.0505	-0.0777814	0.2407	-0.422705
b0562	ybcY DLP12 prophage; predicted SAM-dependent methyltransferase	2.20624	0.733943	-1.47318	LQ	-1.2511	LQ	-0.759815	LQ	-2.97896	-3.22367	-0.576788	-2.35481	-1.32545	-1.07462	-1.09543	-1.13308	-0.410144	-0.562755	-1.1633	-0.133534	-1.21237	-0.0861368	-1.96826	-0.000882885	-0.842912	-0.139936	-0.214239	-1.19143	-0.338823	-2.34198	0.899306	0.59357	-0.165256	-0.958841	-1.01924	-0.231551	0.794184	-0.884575	-0.132869	-0.855692	1.94674	-2.72494	0.259318	-0.943153
b0563	tfaX DLP12 prophage; predicted protein	1.10976	0.372547	-0.542174	-1.77824	-1.86217	-2.23981	-0.6208	LQ	-3.01246	-2.6102	0.463603	-0.799302	-1.01013	-3.933	-2.32094	-0.927714	-1.08451	-1.93926	-1.75478	-0.664622	1.60362	-0.696502	-0.71961	-1.59816	-0.753648	0.15101	-1.23094	-1.08683	-0.748599	-0.852263	0.779046	-0.411342	1.24669	-0.308181	-0.0142453	-1.87606	-1.78947	1.01443	0.141909	0.0820326	2.47014	-3.52372	-0.254042	-1.08227
b0565	ompT outer membrane protease VII (outer membrane protein 3b)	2.64687	0.439146	-0.959961	-0.898632	-0.659908	-0.231608	-0.30247	1.67107	1.23311	-1.76183	-1.39739	-4.12091	-1.55926	-2.29304	-2.64136	0.539729	0.15863	0.636141	-1.89501	0.83307	1.36001	-0.745972	-1.65974	0.489789	-0.539007	0.330674	0.365786	1.96014	1.20204	-2.2483	1.63104	2.02838	2.02824	0.0193887	0.746536	1.56414	2.02675	-1.11	0.321693	-1.41989	1.37258	-0.222362	1.27271	1.59495
b0566	envY EnvY transcriptional activator	1.48548	0.382467	0.392634	0.258673	-2.64835	-3.18031	-7.41114	-1.26876	-7.20586	-2.80965	-1.10051	-2.02173	-1.62695	-1.47851	-1.95197	-1.59526	-1.53132	-2.48847	-0.566189	-8.27228	0.380595	0.152181	-1.26673	0.118743	1.25388	0.403049	-0.319626	-0.0246173	1.77949	-0.344857	1.27086	0.445685	0.70836	0.846782	0.234313	-0.846805	-0.321676	-1.55849	-1.33809	-0.00879629	4.50048	-4.49699	-0.546512	-0.0601914
b0568	nfrA bacteriophage N4 receptor, outer membrane protein	-1.06312	0.491494	0.644678	0.895893	1.16556	1.41083	-0.322658	0.233423	-0.972076	2.39836	2.37049	0.658977	1.77637	0.41349	0.372467	1.08297	1.14421	1.7347	-0.0666821	-0.967056	1.19579	-3.98777	2.28974	1.31336	1.28963	-0.484689	-0.164623	0.689602	0.662185	0.693528	-0.92412	0.0705524	-0.108357	1.44583	0.652828	1.67983	-0.143153	1.89602	-1.91321	1.56508	1.26142	-0.75755	-1.13955	0.166422
b0569	nfrB bacteriophage N4 receptor, inner membrane subunit	-0.285973	0.772679	-0.148254	0.428701	1.09959	-0.592596	0.269021	0.786561	-1.8775	-0.596483	1.0006	1.68638	0.170574	0.626264	0.532481	0.538278	1.66922	1.7605	0.488823	0.187136	-0.62791	-1.56531	0.655959	0.674309	0.993728	-0.406107	-0.388986	0.268384	0.500915	-0.0995038	-0.702058	-0.365415	0.666445	0.484446	1.19276	0.363839	-0.601742	0.685258	1.03521	1.17711	0.9988	-0.0607052	-0.499105	1.54607
b0570	cusS putative 2-component sensor protein	-1.09666	1.12717	1.22949	0.398986	0.312324	LQ	-0.187721	LQ	-0.374189	-0.570364	0.552755	0.950538	-0.533077	0.0299157	LQ	-0.550275	-1.67722	LQ	-0.737022	-0.246985	0.512498	-0.406446	0.464832	1.06342	-0.120315	-0.397516	LQ	0.501966	0.693757	1.34825	-0.81819	LQ	0.536234	1.80137	1.54623	0.255995	-1.98957	-0.0911165	-0.191411	0.409313	-0.0170814	0.263833	0.923561	1.5552
b0571	cusR CusR transcriptional activator	-1.5064	1.10031	0.824329	LQ	1.32504	1.84754	0.2437	LQ	-0.824386	0.583619	1.90291	3.30209	0.482948	0.799337	1.26671	0.686885	0.0356751	0.764143	0.437052	0.533171	-0.0809932	1.89565	1.69835	0.105598	1.35691	0.0724637	0.419919	0.924191	2.37909	1.27915	1.64035	1.81321	1.20336	1.44446	-0.225676	1.85456	-0.0653195	2.37343	-0.237154	0.279811	-0.538731	1.60578	1.30041	1.56046
b0572	cusC outer membrane factor of the CusCFBA copper efflux system	1.31961	0.442245	-0.773831	0.540706	0.273862	-0.825266	-0.244589	-0.55701	-2.12961	-3.68013	1.9715	-0.700236	1.75986	1.00012	0.587672	0.968097	-0.112869	-0.182658	0.530067	1.22204	-2.24187	0.0176948	0.747569	0.159599	0.756274	-0.0381226	-0.265081	0.390256	0.516018	-0.963536	-1.7509	-2.1728	0.493772	0.634588	2.9416	-0.152327	3.05613	-0.657286	-0.730609	1.51301	2.95246	1.59259	0.160374	-1.50728
b0573	cusF periplasmic copper-binding protein	2.03508	0.311798	0.90801	-0.0448716	0.14739	-1.33354	4.18012	LQ	-0.512888	-4.56049	2.36323	-0.944563	1.72922	0.526494	-0.84103	0.867028	3.96328	2.70166	-0.170754	2.23742	0.702313	-0.9192	1.52696	0.52457	-1.10543	-1.47281	-1.68508	0.474359	-0.324927	-0.158471	-2.12179	-3.00708	-1.33123	-0.179637	0.143416	2.26837	2.21816	0.899365	0.678071	1.92659	-1.63521	3.06221	-2.5329	2.43642
b0574	cusB membrane fusion protein of the CusCFBA copper efflux system	0.0448931	0.317576	1.58454	-0.0342122	0.526459	0.591775	-0.701409	-0.782634	0.24745	-0.11182	2.09049	1.25205	0.631361	0.979988	0.779509	0.526152	1.16554	1.3295	0.339163	-1.34124	-1.28943	-0.598126	0.830286	1.14623	0.169759	-0.452368	0.0594747	0.83505	0.822505	1.05759	-1.00548	-0.526023	0.720874	-0.308091	-0.3039	-0.0269249	1.39966	1.68101	-1.06189	1.15557	-2.4363	1.05463	-0.932028	2.43635
b0575	cusA YbdE	-0.453982	0.402785	-0.78476	0.653402	-0.859644	-0.300424	-2.16979	-1.3893	-4.24799	-0.0603072	0.730296	1.40642	-1.31591	0.87927	1.01429	-0.884627	-0.697853	-0.07681	1.38254	-0.712719	-1.6235	-2.43122	2.11209	0.0978754	1.27047	-0.0713917	-0.180922	-0.426955	-0.0712005	1.27973	-3.79277	-2.53847	-1.22734	2.52403	-0.981668	-0.588806	-0.481798	1.3613	-3.46612	1.97338	-2.49693	0.0541108	-2.55636	-0.442885
b0576	pheP PheP phenylalanine APC transporter	0.575938	0.494029	-0.858154	0.0860266	0.173438	0.800714	-6.36991	0.341875	-3.24105	-2.82246	-0.297923	0.321702	0.215868	1.83165	1.80926	0.387262	-0.565273	-0.146768	1.50473	-2.31878	0.363568	-0.0704158	0.568025	1.92806	-0.357675	-0.688943	-0.393537	0.0379115	-2.55908	0.982626	0.172701	0.88937	-0.608206	1.95032	2.05328	-0.236909	0.609721	-1.59132	1.88692	-1.80531	1.02309	-0.356035	-3.62908	-1.22532
b0577	ybdG predicted mechanosensitive channel	3.3293	0.5177	-0.992213	-0.956341	-1.18209	-2.15659	-2.5424	-0.314963	-3.74931	-4.46294	0.30386	0.314261	-0.488051	-0.880895	-0.755718	-0.946849	0.266528	0.109463	-0.180123	-2.0132	1.12846	-0.396921	-0.732013	-1.29116	-0.221173	-0.390271	-0.447134	-1.10541	-0.174613	-2.11443	0.496441	0.162284	0.448194	0.174389	-0.217784	-0.866679	0.75361	-2.05502	-0.385679	-0.0485087	0.209996	-1.66271	0.156059	-2.02025
b0578	nfsB NfnB	0.754292	0.433687	-1.16333	-0.501745	-1.05843	1.23532	-2.7214	-0.870109	-2.4598	-0.150432	0.959089	-2.84492	-0.110271	-0.717637	-0.646753	-0.418486	0.216155	1.34635	-2.30989	-3.44892	-1.11493	-0.428192	0.0331743	2.24347	-0.66832	-1.08041	-1.10512	1.75598	1.83642	-1.48765	-3.58348	-2.54113	-0.430339	1.87075	-1.50424	-0.224968	0.828829	-0.740396	1.0528	0.238696	1.45841	3.30911	-0.724287	3.00369
b0579	ybdF conserved protein	-0.243913	0.679728	0.100866	0.0674705	0.238998	LQ	-1.44254	LQ	0.415838	-0.366112	0.260033	-0.338912	0.601499	-0.782816	-0.271249	0.527848	0.810087	0.704575	1.4657	-0.935524	0.0545924	0.835974	1.17333	0.98925	0.594964	1.31056	1.06778	1.25896	1.61574	0.377238	-1.71501	LQ	0.13813	2.34096	-0.580069	1.47545	-0.795268	1.30241	1.52346	1.11667e-05	-1.15589	2.58684	-0.11241	1.86742
b0580	ybdJ predicted inner membrane protein	-0.344651	0.330999	-1.92901	LQ	-1.85498	LQ	-1.38122	LQ	-0.786624	-0.599882	0.278378	1.26108	-0.510047	-0.803769	-0.349114	-0.476811	1.04984	0.761906	1.80872	1.71052	-2.02715	1.01052	0.647743	-0.650067	1.39491	0.171847	0.135202	-1.18452	1.11165	1.23313	-2.63107	-1.98724	-1.18756	2.25943	0.256864	-0.233474	-1.45374	2.07799	3.17236	2.63639	-1.76252	0.157216	-0.545519	-0.995321
b0581	ybdK gamma;-glutamyl:cysteine ligase YbdK	-0.169799	1.53912	0.0454589	0.109193	-0.183547	-0.1342	-0.42493	0.074998	-0.635889	-1.05995	0.0836804	-0.983786	0.111434	-0.299342	-0.284902	-0.203019	0.416179	0.285419	0.169571	-0.284212	-0.259224	0.73609	-0.297183	0.579743	0.37605	0.304251	0.292922	-0.043599	-0.0500375	0.038388	-0.944369	-0.785785	0.219023	0.726774	0.720545	0.208248	-0.88321	-0.535138	0.866169	-0.205012	0.179038	-0.0281759	0.298716	-0.618109
b0582	insL-2 IS186/IS421 transposase	-0.0992471	0.405294	0.103033	1.04164	-0.325435	1.52062	-0.176799	0.11408	0.122311	-2.06552	0.645619	-2.8399	0.569276	-0.0121584	-0.178445	0.883942	-1.01638	-1.13879	-4.17348	1.0767	2.25032	0.460201	1.66438	0.201332	-0.0309933	0.0687	0.133149	-0.427633	1.56812	-0.533751	-2.73801	-3.40833	-1.13731	-0.967269	-1.1199	0.74241	1.36132	-0.368843	-0.0645269	0.657814	-3.23081	3.12053	-0.69191	0.87115
b0583	entD phosphopantetheinyl transferase	0.240571	0.920465	0.82338	0.0737564	0.822905	-0.563247	0.241181	0.285302	-0.780332	LQ	0.0902226	0.529645	-0.588887	0.251514	0.0594953	-0.257661	-1.23441	-1.038	-0.290001	2.10036	1.85225	0.082344	0.262483	0.257817	0.830552	1.45406	1.11725	-0.329208	1.10974	0.671319	-2.55402	-2.45485	0.248549	0.77807	0.41749	0.786915	-1.55715	0.401825	0.143146	-0.635635	-2.49367	1.00967	2.34748	1.7441
b0584	fepA FepA, outer membrane receptor for ferric enterobactin (enterochelin) and colicins B and D	-0.904704	0.476539	-5.14521	-1.27763	-1.65947	-1.86163	-4.91517	-2.2142	-4.87537	0.10616	-2.0875	0.252431	-1.60566	-0.931183	-1.26873	-3.18446	-2.35564	-2.92828	-1.04044	-3.54526	-4.82283	-1.18324	1.69387	-0.168892	0.540691	-1.15283	-1.11391	-1.53861	-0.80998	0.10397	-2.92848	LQ	-1.30844	-0.0501252	-0.792364	-1.31297	-4.6871	-0.477429	-2.6584	0.696802	-4.42176	2.03328	-0.941663	-4.86824
b0585	fes enterochelin esterase	-2.12975	1.01302	-1.00021	-0.131347	0.792302	0.0846419	-1.539	1.10931	-0.659098	-0.0516433	0.554902	2.30395	0.688516	0.539057	0.245919	-1.3865	1.50171	1.57533	0.174709	1.69059	-1.16475	-1.28737	1.51522	1.63924	2.14445	1.13268	1.08428	1.12722	-0.179327	0.0624304	-0.359173	-1.26102	0.321541	1.81188	1.9372	0.436102	-1.73354	1.58252	-1.31009	1.47203	-1.28285	1.35906	1.00576	-1.18645
b0586	entF serine activating enzyme	-0.87825	0.517315	-1.07993	-1.18969	-0.894575	-0.210721	-3.86801	1.34449	-3.25465	0.146014	-0.0371643	0.443461	-0.748687	0.266353	0.401882	-2.64736	0.0180887	0.771123	-0.0584631	1.53011	-2.36521	-1.52918	0.645789	0.515398	1.01941	-0.898819	-0.0463531	-1.28147	-0.776716	0.634241	-0.562819	0.418054	-0.990747	0.988443	-0.591616	0.91092	0.519331	0.106991	-1.6945	-0.460687	-1.26945	-0.0160683	-1.67818	1.09589
b0587	fepE ferric enterobactin (enterochelin) transport	2.45968	0.445443	-1.52739	-1.96841	-1.30945	-4.05648	-5.25903	-0.807811	-5.34849	-4.17172	0.0565522	0.428179	-1.8192	-1.74136	-2.18977	-1.59531	0.417	0.495293	-1.78914	-0.757387	-1.40283	1.16022	-3.41697	-0.684973	-0.569663	-0.21056	-0.21846	-0.879707	-2.31229	-2.20272	1.49106	0.810763	1.42423	1.40321	1.23851	-1.80393	0.351109	-2.6241	1.78799	-1.13263	2.592	-3.39804	0.638399	-0.0102564
b0588	fepC Ferric Enterobactin Transport System	-0.98609	0.793623	-0.763346	0.0271396	-0.289216	0.0640569	-1.23868	0.886989	-2.05393	-0.389222	0.0265929	0.13295	-0.392468	0.255589	0.665816	-0.522741	0.115303	0.546518	-0.434526	-1.52728	-0.989204	-0.0293868	-0.0229219	-0.811428	-0.340913	-0.745063	-0.0398853	-0.307739	-0.200362	-0.148551	-0.678902	0.210524	-1.10921	1.51961	0.199231	-0.63565	3.09033	0.301156	-1.52306	-0.289657	-0.588028	-1.09322	-0.331152	-0.121785
b0589	fepG Ferric Enterobactin Transport System	-2.6175	0.641565	0.416355	0.66921	0.199491	1.14144	0.906968	0.712806	-2.10811	2.04013	1.44139	1.34702	0.838999	0.82458	0.8374	-0.344474	0.0368429	0.563225	0.764268	-1.20646	-1.0655	-0.801522	1.18188	-0.651051	0.758094	-0.650342	-0.0585736	-0.876815	1.03682	1.09947	-0.466528	-0.092413	-1.54706	-0.176024	2.21957	-0.912052	-0.80381	1.89804	-1.38087	1.08013	-0.830095	-0.60594	-0.0506724	-0.393668
b0590	fepD Ferric Enterobactin Transport System	-3.06047	0.795042	0.176965	0.659678	1.44172	1.30749	0.113172	0.715652	-1.33358	1.2421	1.3977	1.41351	0.911159	0.953278	1.06588	-0.0615513	0.244713	0.402037	1.00564	-1.10898	-0.6292	-0.672226	1.28034	1.89839	0.885488	0.161445	-0.498707	-0.421012	1.04329	1.16839	1.45991	0.56382	1.16952	-0.403131	-1.40286	-0.509626	-1.33763	LQ	-1.38806	1.25377	-1.02525	0.372226	0.0650292	0.434653
b0591	entS EntS MFS transporter	-1.16844	1.37138	-0.582281	-1.01354	-0.579046	-0.652718	-1.09932	0.307164	-1.31505	-0.955086	0.115971	-0.450687	0.313664	-0.145226	-0.288292	-0.442562	-0.956339	-1.36641	0.985617	-1.78357	0.18786	0.196888	0.776311	0.150244	0.340337	-1.24877	-1.39206	-0.00280383	0.00267867	0.663593	-1.41265	-1.89044	-0.798035	-0.697472	0.401395	0.212983	-1.97135	-0.00623058	-1.96601	0.0855539	-1.45658	0.0365099	-1.01784	0.970509
b0592	fepB Ferric Enterobactin Transport System	-1.67005	0.628891	-1.2211	-0.75031	-0.289725	-0.605978	-2.81528	1.7975	-1.96365	0.902927	0.252656	0.71641	1.17076	-0.892164	-0.42273	-1.91249	-1.53267	-1.32629	-0.043285	-2.9399	-2.21554	-2.19508	0.397847	-1.2563	0.361704	-1.1286	-0.673305	-0.100526	1.73893	1.42979	-2.19707	-2.65252	-0.832149	-1.6844	-2.26269	-1.03439	-3.21906	0.673377	-2.37164	0.342284	-1.3806	0.254056	-1.43814	-0.231149
b0593	entC isochorismate synthase 1	-1.82857	0.892368	-0.666278	-0.895087	0.784048	1.3031	-2.10798	0.966843	0.58185	LQ	-0.30325	0.491038	0.0906255	1.13016	0.975867	-0.522055	-0.983104	-0.723819	0.188551	-1.62377	-0.92162	-0.826419	1.21374	0.163751	0.605285	0.568096	0.652391	-0.431286	0.082157	1.35877	-1.02558	-1.46683	-0.450293	-0.446597	1.07257	0.265789	-1.75922	1.49221	-0.36153	1.51607	2.62113	1.82694	-0.441662	2.21757
b0594	entE enterobactin synthase multienzyme complex	-2.34862	0.762532	0.585309	1.17472	1.2708	2.05931	0.198233	1.80336	0.687047	2.83652	1.83426	-1.93216	1.42229	1.15761	1.17851	1.01729	1.16465	1.53498	1.58699	-0.804225	2.071	0.237794	1.43833	0.638739	1.1728	1.52398	1.944	0.340934	-0.0361904	0.978164	0.200204	0.795349	-0.840114	-0.00246317	-0.239209	1.67104	2.00329	LQ	-1.11194	-0.526324	-2.58783	-1.26381	-2.03861	0.901266
b0595	entB apo-EntB	-1.45191	0.913122	0.113362	0.604919	0.601975	1.30891	3.91119	-0.438724	-0.0994644	1.17189	0.180541	0.442555	0.237329	0.662495	0.639081	-1.02178	1.29884	1.36183	0.131572	-1.21604	-0.915796	0.330043	1.06413	0.799927	0.896535	0.209887	0.448228	-0.719393	0.344932	0.219392	-1.42424	-1.12672	-1.37715	-0.180358	-1.86923	-0.51834	-1.3789	0.805931	-1.34158	0.248241	-1.01612	-1.09943	-0.612751	2.01236
b0596	entA 2,3-dihydro-2,3-dihydroxybenzoate dehydrogenase	-0.597686	1.26865	0.590113	-0.206346	0.773813	-0.428517	-0.879658	-0.0642518	-1.20915	0.648184	0.678493	0.137269	-0.345471	0.272121	0.487309	-0.458851	0.134884	0.24165	0.753959	-2.05391	-0.441201	-1.73807	0.205909	-0.751275	0.717124	0.201152	0.389382	0.255026	0.229847	-0.114943	-2.02563	-1.67198	0.322383	-0.232205	0.69382	-0.913046	-2.01667	-0.147557	-2.36351	-0.59467	-1.04795	-1.16531	0.261695	0.645019
b0597	entH thioesterase	-0.364816	0.880753	-0.0370294	-0.288673	LQ	0.313656	-1.27379	1.27483	LQ	1.05577	-0.275846	-0.162598	0.927184	0.142889	0.395964	0.650842	-1.66251	-0.521145	0.942452	0.255005	0.897258	0.255961	0.865794	-0.884625	0.291229	0.443023	0.598865	-0.0264126	-0.300857	1.39422	0.749603	0.725822	0.235194	-0.368494	0.496434	0.229468	-1.45178	0.452425	-1.76715	1.52496	-1.24886	0.112532	0.739821	0.935377
b0598	cstA peptide transporter induced by carbon starvation	-0.229119	0.950206	0.434032	-0.0345155	-0.273096	-0.0321776	-0.860555	LQ	-1.6005	0.461904	0.363424	0.0119039	-0.021775	0.220528	0.573615	-1.19298	-0.203201	-0.0676563	1.00613	-2.34144	-0.349718	-1.38379	1.18415	0.462763	0.63098	-1.02997	-0.850473	-0.410727	0.112291	0.582954	-1.01058	-0.887611	-0.476128	0.457641	-1.0613	-0.379756	-2.33001	0.666852	-0.320763	0.618258	-0.188957	-0.702084	-0.285566	0.228884
b0599	ybdH predicted oxidoreductase	-0.931453	0.798446	0.285546	-0.164933	0.83406	0.409891	1.37486	-0.438091	0.617504	0.189287	0.759321	2.1001	0.960014	1.26525	1.3624	0.871165	-0.997612	-0.526553	-0.326583	-1.68695	-1.0569	-0.61637	1.1816	0.583609	1.58464	-0.0232029	0.253437	0.599081	0.152016	1.71215	-1.49771	-1.23844	0.327894	-0.726099	1.11948	0.230949	-0.486596	1.75698	-1.63429	1.4836	-1.78569	1.78754	-0.633404	1.34548
b0600	ybdL methionine aminotransferase, PLP-dependent	-0.554877	1.0108	-0.0961884	-0.124724	0.516173	-0.198592	-1.79243	-0.875391	-0.703043	-0.724935	0.804732	0.263453	0.405904	-0.295424	-0.184558	0.262148	0.901958	1.23867	1.34093	0.372039	0.473094	-1.35913	0.789554	-0.672885	-0.301587	0.213074	0.395403	-0.192782	-0.0246007	0.413346	-1.85602	-1.46853	-0.433277	-0.379989	0.204462	0.632541	-0.848507	1.05936	-0.487998	1.46136	-2.20136	0.629887	-1.00546	0.251704
b0601	ybdM conserved protein	0.550399	0.90063	-1.44413	-0.219526	-0.0450101	0.485319	-2.5086	-0.759879	-1.42833	-0.605674	0.84577	0.0400841	0.699626	0.489661	0.455766	0.13119	2.68079	2.57441	-0.25344	1.08274	-0.787717	0.70842	-0.269059	1.36744	-0.665484	0.226039	0.134217	0.304383	1.01206	0.0418065	1.92187	1.9584	-0.0442192	1.02114	-0.149024	-0.217404	-0.470547	0.0307196	1.24988	-0.734117	-2.0198	0.461612	-1.55057	-0.0689512
b0603	ybdO predicted DNA-binding transcriptional regulator LYSR-type	2.89271	0.675173	-3.0537	LQ	-2.05416	LQ	-5.09475	LQ	-3.21951	-5.69076	-0.78555	-3.10307	-2.19768	-1.75097	LQ	-2.13182	0.563488	LQ	-2.10083	-1.58658	-2.36574	0.380593	-3.2963	-1.19152	-2.03748	-0.271872	0.242032	-0.850307	-2.40628	-2.37178	1.20999	1.06242	0.77864	-0.390128	-0.220428	-0.744839	-5.48844	-2.53579	LQ	-2.02328	1.02213	-3.66762	1.18218	-1.79454
b0604	dsbG DsbG oxidized	0.557907	0.568783	-1.5554	-0.370563	-1.87958	0.0431065	2.02243	1.19152	-0.351593	-3.10069	0.935896	-0.0248281	0.504107	-0.472	-0.30227	-0.105839	-2.94037	-2.06332	1.36498	-2.37671	0.731276	-1.37344	0.409808	0.024008	0.142081	0.341158	0.520925	1.58604	-0.575371	-0.178311	0.291191	1.5473	0.444045	-0.572721	-0.745786	0.625455	-1.07098	-1.24801	0.278705	-0.552052	-0.284801	0.742784	0.885733	0.0155695
b0605	ahpC AhpC component	-0.967979	0.416141	-3.27894	-1.21998	-1.52937	0.2584	-1.25924	0.0344884	1.01222	2.61619	-1.33088	-0.440619	-0.903533	0.0900319	0.303707	-0.712775	-1.60258	-0.675016	-0.231488	-2.5608	2.25827	-0.398226	0.763171	-0.460644	0.275384	0.100733	0.457318	0.371621	-0.360045	1.32387	-3.47333	-2.27777	0.965106	-1.81073	-3.39412	1.33253	-2.84608	0.385414	4.80011	-0.459765	-2.21055	0.501374	3.91266	1.4123
b0606	ahpF AhpF component	-1.0373	0.460517	-1.62045	0.48563	-0.940797	1.08265	0.232694	-1.44008	-1.60189	-0.412211	1.04877	1.54632	0.754698	0.333623	0.514806	1.61638	3.2389	3.62728	1.00129	-2.51556	1.64895	1.36019	2.23266	-1.75481	-0.170561	-0.203295	-0.227765	-0.507304	-0.853545	0.122499	-1.02537	-0.735778	-0.486779	-1.47996	0.309157	0.814487	-3.63934	2.32012	-2.04537	-0.142454	1.14385	1.02554	-0.572887	2.91608
b0607	uspG universal stress protein UP12	0.115796	0.405161	0.318505	LQ	0.802469	LQ	-4.24083	LQ	-0.285471	0.476641	2.22269	0.614068	1.83381	0.389295	0.536674	0.773634	1.04941	LQ	1.55532	0.876814	0.77885	-0.400267	1.34235	0.647888	1.11542	-0.332104	-0.122148	4.2075	1.08266	0.485157	1.48648	1.24492	-0.263178	-0.909588	0.867849	0.455542	0.25939	1.17628	1.1163	0.857136	-0.779745	2.89019	-0.398213	3.02032
b0608	ybdR predicted oxidoreductase, Zn-dependent and NAD(P)-binding	0.350688	0.343751	2.11116	0.214059	-0.34498	0.377362	-9.76006	-6.49435	-2.63449	1.51481	2.35007	-4.35835	1.09661	0.573667	-0.384785	-0.227163	-2.84614	-4.07025	-2.3028	-0.41921	-0.554088	0.250019	1.64792	3.37283	1.33106	0.936406	0.297071	1.65277	0.755058	-0.185546	-5.7838	-5.98686	1.36655	0.168946	2.45057	2.87714	-1.43044	0.969321	-0.483071	-0.170568	-1.21919	0.355277	-1.39313	-1.07159
b0609	b0609	-0.711836	0.753206	-0.686027	0.699848	0.306325	1.24939	-1.04933	LQ	0.619879	-0.0271523	1.90766	0.38096	1.81519	1.00781	0.814446	0.591458	0.379991	0.480614	-0.301868	-0.855592	-0.683471	1.77333	1.28369	0.902904	1.22474	0.712034	0.794498	0.886665	0.380059	0.930515	-1.60122	-1.02084	-0.191001	-0.0550737	-0.48378	1.81885	-1.19149	0.979523	-0.472096	0.37453	-0.539457	2.45644	-0.0398672	-0.646953
b0610	rnk regulator of nucleoside diphosphate kinase	-1.54133	1.58905	0.437069	0.216817	1.22948	0.877957	-0.140225	-0.287351	1.05289	0.203607	1.17425	0.705845	1.51612	0.246633	0.235985	1.01771	0.128643	0.137625	-1.55467	-1.64602	-0.187042	0.733533	1.20044	-0.0227877	0.808393	0.662293	0.76433	0.917806	-0.488528	0.0824994	-1.52546	-1.24502	0.244669	1.07663	0.241446	1.00801	-1.74985	0.0171483	0.608993	-0.00951473	-0.659441	0.707796	0.457498	-0.0427123
b0611	rna RNase I, cleaves phosphodiester bond between any two nucleotides	-1.03848	0.648342	0.20763	-0.780688	0.576446	1.8912	2.01332	0.627504	-0.154652	0.990397	0.734726	0.448154	0.229822	1.02844	1.27148	1.52662	-0.18232	-0.0730248	0.702702	0.0117351	-0.954358	0.381173	0.747125	-0.616825	0.278125	0.672725	0.930981	0.0255409	2.44319	1.58773	0.642735	1.1629	0.845152	0.0700147	0.360439	1.06086	-0.924806	0.899604	0.358538	0.240277	-1.00634	1.78036	0.897213	2.2125
b0613	citG triphosphoribosyl-dephospho-CoA synthase	0.244087	0.511082	0.148512	-1.04601	-0.357422	-0.735675	0.0216131	-0.985422	-2.80747	-0.848044	-0.224977	2.3509	-0.549219	-1.14426	-1.30871	-1.11187	-3.53088	-2.94957	1.61469	0.0437854	2.74244	-0.13439	-0.860633	-0.382744	0.124483	-1.7924	-1.69811	-2.38026	0.787499	-0.596932	-4.57727	-4.27564	-0.0464128	0.0348519	-0.556361	-3.15374	0.182637	-0.305649	1.21387	0.183597	-3.96759	0.710076	-0.654049	-1.54648
b0614	citX apo-citrate lyase phosphoribosyl-dephospho-CoA transferase	-0.868349	0.513052	3.05554	-0.030931	1.47526	0.517685	-1.41176	0.945059	-1.88048	0.908803	1.7031	1.25002	1.20656	0.557476	0.295068	0.623174	-1.94881	-1.14358	0.547762	4.56482	3.20563	0.676999	0.898221	-0.725456	2.62464	1.2607	1.31945	-0.161522	1.40149	0.530259	-2.73689	-1.97005	1.56742	0.805434	0.890548	0.444276	-1.17648	2.53841	-0.7107	1.47737	-2.25131	3.08433	1.78078	-0.396639
b0615	citF citrate lyase, citrate-ACP transferase alpha; subunit	-0.959846	0.968102	0.859993	0.17286	-0.297151	0.367684	-1.52192	-0.495056	-1.28926	-0.486574	0.720068	0.0948376	0.0613366	-0.017654	-0.0579065	0.943432	0.781187	0.57747	-0.625508	-1.81869	0.748945	-0.817143	0.353027	0.903436	0.90763	-0.812201	-0.660214	-0.198792	-0.110131	-0.548865	0.801164	1.17054	-0.540434	1.3713	-0.0925361	-0.494052	0.0210372	0.268878	-0.565554	-0.821147	-1.73064	-0.0835576	-1.75031	0.344134
b0616	citE citrate lyase, citryl-ACP lyase beta; subunit	-1.44424	0.961076	0.6259	-0.33967	-0.281649	0.38858	1.38189	-0.0167261	-0.614583	-0.730256	0.755956	-0.567355	0.306798	0.29211	0.421721	0.979852	-1.24862	-0.641331	-1.08462	0.615998	1.96933	-0.177618	1.16447	-0.449465	-0.239935	0.378143	0.559801	0.562854	-0.877146	0.0278732	-2.10075	-1.58855	0.182613	0.0913375	1.49985	0.320352	-1.73371	1.2935	-1.17977	0.887719	-1.29034	1.25144	-0.556496	0.222737
b0617	citD citrate lyase, acyl carrier gamma; subunit	-0.91632	0.661603	-0.536592	-0.9619	0.267256	LQ	-0.207383	LQ	-1.50708	0.413208	0.714731	1.20125	1.37685	0.628492	0.250916	0.336215	0.052676	-0.371882	0.528132	-0.1981	-0.350906	-0.899369	1.43509	-0.146455	0.904969	0.615597	LQ	-0.144829	0.655503	0.801818	-1.80294	LQ	-0.482726	-0.123388	0.771986	0.445611	-1.44539	1.44044	-1.01925	2.1051	-0.848911	1.45407	-0.61821	-0.643128
b0618	citC citrate lyase synthetase	0.376779	0.603585	-1.26413	-1.58499	-0.0183058	-1.50079	-1.44503	-0.278423	-1.55842	-4.4664	1.19803	0.94615	-0.514766	1.10592	0.953352	-0.580295	0.0659256	0.432188	0.0933957	-0.298302	-0.649788	0.842019	0.834019	-0.67387	-1.3107	0.733661	0.443053	0.318857	-1.87611	0.592576	-0.840317	-1.37064	0.00759559	0.162053	-0.767321	0.746578	0.995551	-0.326152	0.20231	0.257484	1.32467	-1.18906	0.300185	1.17699
b0619	dpiB sensory histidine kinase in two-component regulatory system with DpiA	0.626696	0.417101	-1.85179	-2.62034	-2.10296	0.206256	-2.84826	-2.06189	-4.86168	-4.18986	-1.06789	-3.53935	-0.505011	-0.552813	-0.71891	-0.29079	0.986741	0.69615	-1.72992	-0.368708	-3.6472	0.843023	0.994149	-0.113153	1.57113	0.974743	0.961073	-1.71756	-1.45544	1.44547	-2.41245	-3.67749	-0.433461	0.270534	-1.02841	0.55941	-2.51484	-0.326734	-2.28675	1.36609	-1.21108	1.87968	0.630565	-2.27226
b0620	dpiA DNA-binding response regulator in two-component regulatory system with DpiB	0.266225	0.958293	1.00327	-1.76711	-0.0713391	LQ	-0.14489	LQ	0.159746	0.481478	0.567569	-1.71055	0.558547	0.922796	1.01668	0.49012	1.36892	1.43458	1.69815	-0.753258	-1.47681	-0.105757	0.577576	-1.17459	-1.12523	-0.305269	0.108169	0.593689	1.01417	0.625235	-3.28571	LQ	-0.543004	-1.44174	0.0779029	1.20516	0.837256	0.304491	LQ	0.378037	-2.58882	-0.271797	-1.22371	2.35582
b0621	dcuC DcuC dicarboxylate transporter	0.339376	0.403315	0.311595	-0.741613	-1.7852	-0.442467	-3.93026	0.732036	-0.422657	-3.56715	0.954689	0.738215	0.338939	1.28915	0.532866	-0.143425	2.62852	2.65604	1.21567	4.70469	0.194603	1.98685	-1.76094	-0.981759	1.50216	-0.0107153	0.683154	0.446102	1.38554	1.61643	1.07289	1.19697	0.597577	-0.942669	-0.167278	-0.22782	1.70932	-0.287048	0.611099	-1.34441	2.74276	-0.33943	0.998089	0.54957
b0622	pagP PagP monomer	1.41066	0.424204	-1.62308	-1.97439	-1.75266	0.0218113	-6.38373	0.72047	-2.77077	-4.56531	-0.561078	-1.29877	-0.47992	-1.23604	-1.86646	-1.00547	-0.981549	-1.41243	-1.79505	2.63853	-0.229991	1.97136	0.724075	0.63227	0.135507	0.719838	0.303797	1.4589	0.64917	-1.86472	4.44456	3.95765	0.535904	-0.401287	0.671657	1.98851	2.56138	-0.0736609	-1.09994	-0.324551	1.05587	-1.18876	-0.587276	-0.0582384
b0623	cspE transcription antiterminator and regulator of RNA stability	-0.410766	0.463565	-0.149521	0.645332	0.164732	0.392074	-1.13356	LQ	0.527993	0.833526	-0.64667	1.61546	-0.947711	0.323294	0.835771	-0.642756	0.051481	0.318436	1.5615	-0.413212	-0.864112	-0.628893	1.30244	-0.411314	1.25604	0.115245	0.417637	-0.190452	1.45638	1.71911	-1.17402	LQ	-0.611357	0.286593	0.436606	0.0773969	-0.665391	2.42001	-0.786216	1.24173	-0.750701	-0.338843	-0.170093	-0.344529
b0624	crcB protein involved in resistance to camphor-induced chromosome decondensation	-0.26355	0.924959	-0.889935	-0.476961	-0.566552	0.171938	-1.13967	LQ	-0.175079	-0.315321	0.0641223	0.824906	-0.131329	-0.266246	-0.0430878	-0.777099	-0.98098	-0.418954	0.539818	0.257946	-0.816084	-0.580125	-0.433991	0.17829	-0.189056	-0.152367	0.0140026	0.419541	1.03279	0.661092	-1.54982	-0.830409	-0.462074	1.33682	0.0921757	-0.780271	-1.11901	0.439784	0.764188	-0.406084	-1.03008	-0.941983	1.11571	-0.858122
b0625	ybeH predicted protein	-0.551295	0.364675	-0.313419	0.0102855	-0.822402	LQ	-1.29332	LQ	0.505081	0.487674	1.83363	3.20172	1.06276	0.146327	0.00351101	-0.68372	0.543121	0.473274	0.431155	-1.13805	-1.78772	0.863377	1.12232	0.739869	1.50919	0.334661	0.664954	0.919574	1.48556	1.95371	-2.20099	-0.939294	-1.38932	0.917658	-2.16114	1.63296	-0.651138	2.38222	1.11132	0.601905	-0.819109	0.370704	0.537847	0.854676
b0626	ybeM predicted C-N hydrolase superfamily, NAD(P)-binding amidase/nitrilase	-0.99361	0.738858	0.903398	-0.235324	0.0464185	0.1715	-0.564505	-0.438955	-1.18573	0.00552174	0.920007	0.571436	0.292582	0.00650886	-0.231196	-0.735247	0.762585	0.74814	0.0844824	-2.05726	-0.311749	-0.0692921	0.72604	0.216165	1.0744	0.222453	0.291315	2.02655	0.0857458	0.571126	-2.07927	-1.99976	-0.338322	-0.160112	0.101675	2.31296	-1.94758	1.16065	-1.74043	0.663875	-0.211376	0.41466	-0.0996425	1.71381
b0627	tatE TatABCE protein export complex	-0.0523124	0.88224	-0.680885	LQ	-0.493747	-0.283122	-0.0013646	LQ	-0.503409	0.41508	0.244566	0.128765	-1.08912	-0.111474	-0.144153	-0.639535	-0.9628	-0.432808	-0.147571	-1.10242	-1.30025	-0.431489	0.580153	-0.573453	0.194679	0.672016	0.490341	-0.856263	-0.107749	0.812627	-1.62069	-1.03633	-0.576522	-0.772696	-1.26457	0.505254	-0.474471	0.294608	-1.03253	0.88104	-0.966921	0.428603	-0.0856172	-0.909707
b0628	lipA lipoate synthase monomer	-2.19615	0.441909	8.21729	8.45256	1.46854	3.75552	14.6622	8.54153	3.49347	5.07045	2.05586	1.08518	0.918195	1.30412	2.04591	-0.149514	1.0684	2.1175	0.168086	-2.28883	-1.08039	0.149383	1.87111	0.533283	0.584928	0.376984	1.71618	1.24856	1.00458	2.85234	-2.22872	-0.847042	0.143868	1.78409	-1.3255	0.475077	-0.962095	1.81221	0.209917	0.292129	-1.46099	-0.134223	0.1704	-0.0830934
b0629	ybeF predicted DNA-binding transcriptional regulator, LYSR-type	2.02029	0.656208	-0.837184	1.80774	-0.668899	-0.854892	-2.66341	2.11145	-1.57523	-0.583422	-0.487971	0.733559	-1.59215	-0.963399	-0.998338	-2.77053	-0.912296	-0.642997	-1.44448	-3.73236	-0.08492	0.109386	-0.806997	0.748443	-0.440174	-0.578173	-0.100069	-0.457026	-0.410348	-2.72042	1.35318	1.69593	0.405696	-0.567164	-0.324463	-0.0650429	-0.00238983	-0.435772	-0.392762	-0.367443	-3.88978	-3.89398	1.56139	-0.259599
b0630	lipB lipoyl-protein ligase	-0.851237	0.996424	6.10153	5.94534	3.28349	4.37416	7.74765	6.40865	3.88419	3.92853	0.00689405	-0.480128	0.715514	0.648346	0.852786	0.966276	1.27471	1.31292	-0.401271	0.794592	2.52338	0.968764	-0.0962582	0.667141	-0.389917	-0.753652	-0.178743	0.644682	-0.0705087	-0.559731	-0.88587	-0.330097	-0.917353	-0.856818	0.66269	1.2992	0.215587	0.246689	-0.944873	-0.281332	-0.46213	-0.588835	-0.869352	1.27593
b0631	ybeD conserved protein	-0.763039	0.515815	1.32595	LQ	0.945566	LQ	3.88352	LQ	1.4977	1.76087	-0.87142	1.06725	-1.13106	-0.155128	0.0532108	-0.806028	-0.558595	0.225471	0.43741	-0.439062	-0.0142051	-0.109725	0.491514	-0.0760415	0.444348	-0.797758	-0.0119392	-0.129738	0.9668	0.972172	-1.03224	-0.284407	-1.18797	-0.212996	-1.49446	-0.139364	1.91483	1.34871	-0.637224	0.341544	-0.538364	-1.19528	-0.123424	-0.340243
b0632	dacA D-alanyl-D-alanine carboxypeptidase, fraction A; penicillin-binding protein 5	-1.61427	0.832272	0.763551	1.36656	-0.152524	1.22022	0.880206	1.25477	0.93223	1.38441	-0.704327	0.688754	-0.661752	0.362943	0.255819	0.00893265	-0.25792	-0.060109	0.438053	-0.837315	-0.670075	-0.833709	1.19789	-0.718449	0.405618	0.290115	-0.0110083	-0.133752	0.558761	0.684728	3.37442	3.73472	0.160567	1.52652	-1.43463	0.702126	-0.969448	0.809055	-1.05494	0.438639	-0.385551	-0.319975	-0.536385	2.82644
b0633	rlpA rare lipoprotein RlpA	-1.37631	1.0234	0.756937	-0.852509	0.0457173	-0.169195	-1.89891	-0.253401	-2.26813	0.593159	1.44139	1.90626	0.338961	0.792371	0.6037	0.902374	0.870001	0.904464	1.24566	-1.97359	-1.74414	-1.23642	1.12619	1.75468	0.918334	0.418786	0.300443	0.00331312	-0.0671167	0.891335	-0.929598	-1.27467	0.220943	-0.496949	-2.87826	0.474301	-1.89909	0.939368	-1.26139	-0.201546	-0.667373	0.62547	0.685235	-1.10038
b0634	mrdB rod shape-determining membrane protein; sensitivity to radiation and drugs	-1.79283	0.555918	-1.87308	-0.477431	-1.73301	0.0642156	-1.80965	-1.5314	-2.29604	0.926589	0.864112	1.72078	-0.685761	0.396317	0.579185	-1.43924	1.02484	0.60287	1.65417	-1.44732	-1.89468	-1.55628	0.983853	-0.0716984	1.22894	1.89754	0.102712	-0.684263	1.22674	1.61605	-1.07951	-2.18947	-1.05149	0.417078	-3.43258	-0.417385	-1.59224	1.62504	-1.36615	1.05248	-1.14413	-1.84277	0.51792	1.16062
b0635	mrdA cell shape; peptidoglycan synthetase; penicillin-binding protein 2	-3.17765	0.626078	0.575892	0.926218	-0.0874325	1.31776	1.65919	2.29318	-0.0428214	1.86815	1.95092	1.46045	1.53939	2.58125	2.3292	0.823228	3.45872	3.48092	2.16531	-0.959678	0.0404412	-0.624963	1.41823	-0.726322	1.65715	0.768007	0.299754	1.29901	1.12919	1.58465	0.239716	-0.669648	0.844622	0.171455	0.444944	-0.481488	-1.29676	1.57553	0.0284581	1.43478	-0.94456	0.875865	LQ	2.20161
b0636	ybeA conserved protein	-1.97491	0.325462	-0.722494	-0.297797	-1.69773	-0.133719	-1.27015	-1.1565	1.8723	1.01747	0.447659	1.38267	0.589977	1.24899	0.911829	-0.952715	-0.1081	-0.059578	1.72036	-1.00882	-0.517424	0.16973	0.228932	-0.783409	2.27531	0.751959	1.44527	-2.19032	1.62837	2.4779	-1.25114	-0.817871	-1.82545	0.463228	0.425266	0.00985457	-1.21283	3.0612	-0.71917	1.15916	-0.400517	-1.62325	1.82198	-0.649516
b0637	ybeB predicted protein	-0.749626	0.353651	-0.357212	LQ	LQ	LQ	0.0266215	LQ	LQ	1.21446	0.0643983	2.03582	-0.376067	0.534806	1.30119	0.352012	-0.797278	0.423035	1.99454	-0.86051	-0.461903	-0.000293034	0.757694	-0.307844	1.25027	0.337112	1.00661	0.162642	2.04004	2.44586	-1.56986	-0.181854	LQ	0.183553	LQ	0.59701	-0.740788	2.32044	-0.699768	1.63291	-0.604302	-0.298734	1.55339	-0.0569708
b0638	cobC predicted alpha;-ribazole-5'-P phosphatase	-0.319578	0.635548	0.0180369	-0.347691	0.568287	-0.727527	-4.12753	-2.70623	-1.02113	-2.04815	1.01767	3.86291	-0.329607	0.108195	-0.245524	0.797894	-4.04881	-3.84192	1.8592	-1.77439	2.48012	2.07525	0.369062	-0.388839	0.959943	1.36632	0.970566	0.348785	1.36829	0.33805	-5.25438	-4.64541	1.3245	2.19249	0.625003	-0.938194	-3.60754	0.573576	0.58845	1.56909	-1.61647	-3.10919	1.23818	-1.73197
b0639	nadD nicotinate-mononucleotide adenylyltransferase	-1.58234	0.345104	-0.747826	0.430559	-0.313844	1.98654	-0.418065	-0.290814	-0.140115	3.03221	1.92638	2.17772	-0.00382213	1.08525	8.99137	2.03557	-1.38503	-0.352438	1.46955	-1.11225	-0.808436	-0.148428	0.306441	0.0365094	1.14789	-1.17835	0.707869	0.331945	0.77852	1.94576	-2.97377	-1.29198	-1.86455	0.0401391	-2.85751	0.550463	1.16857	2.29904	1.13331	2.7247	3.56188	0.223305	1.20952	-0.678896
b0640	holA DNA polymerase III, delta; subunit	-2.09574	0.747833	-1.39637	-0.618725	-0.071146	1.23699	-0.504253	-0.532815	-0.465357	1.18987	1.27839	0.413868	1.0313	-0.128817	-0.0148167	0.346806	0.483329	0.442992	3.15317	-1.15255	-0.792938	-0.193485	1.06817	-0.181532	0.216684	-0.0882612	-0.27542	1.09761	0.357446	0.455635	-1.20919	-1.58569	-1.56811	-0.33917	-1.67792	0.623486	-1.3331	0.77704	0.957676	0.501552	-0.800387	2.97666	1.43803	-0.996087
b0641	rlpB rare lipoprotein RlpB	-2.55613	0.500823	-0.263388	0.689646	1.47971	1.11296	1.27513	0.796636	1.04196	1.46267	1.59229	2.25763	0.742727	1.53802	0.913054	1.03458	0.606745	0.0327425	1.58574	-0.190604	0.171631	0.217959	2.02794	-0.443385	1.94289	0.356747	0.0972639	0.559736	1.6969	2.23693	-0.375735	-0.836651	0.553613	0.404466	-0.374646	-0.186469	-0.143143	2.50109	-0.284574	1.81568	0.283852	0.394256	0.95761	2.05089
b0643	ybeL putative alpha-helical protein	0.397357	0.695289	-1.48638	-0.822166	-0.604805	LQ	-1.94023	-1.21193	-2.38171	-1.87191	0.186642	-0.969678	0.478537	-0.669378	-0.46979	0.73624	-1.82687	LQ	-1.24196	-0.0717158	-1.2833	-1.40056	0.507199	-1.06619	0.185639	-1.81781	-1.34249	-0.763771	-0.382357	-1.29193	-1.59498	LQ	1.2825	0.406691	0.586918	0.23705	-2.71542	-0.236765	-0.367882	-0.0862154	-1.59342	-1.31346	-2.03868	-1.48833
b0644	ybeQ conserved protein	0.186865	0.272483	3.96879	0.839727	5.38375	-0.570533	5.58967	LQ	-0.732454	0.863434	6.42559	3.56928	5.81824	0.07734	1.1454	5.20193	0.176689	0.152662	1.62469	-0.300327	6.43788	0.0965961	1.32019	0.0258589	2.2197	0.164942	-1.09594	6.49571	2.882	2.192	0.537961	1.6391	8.05119	0.206322	6.46982	-0.532029	-1.01516	3.04018	-0.732393	1.66465	0.564113	1.75903	-0.318726	5.36487
b0645	ybeR predicted protein	2.39577	0.561151	-1.20484	-0.85959	-1.43392	-1.56449	-2.56292	-1.30456	-4.64053	LQ	-0.252149	-2.38961	-0.324353	-1.74658	-1.7373	-1.20411	1.64332	0.908449	-1.97603	-0.76864	-1.48317	-0.452757	-0.532844	0.426926	-0.61694	-0.300187	-0.489389	-1.70413	-1.33978	0.305791	-1.07813	-1.01957	-0.574731	0.100469	0.473705	-0.130161	-1.22488	-0.470549	-1.18887	-0.408465	-4.70373	-0.230359	-0.574726	1.01686
b0646	djlB predicted chaperone	2.74606	0.558534	0.774918	-0.656065	-0.62921	-1.59216	-1.56971	-0.841538	-3.20952	-5.158	0.21473	0.42633	-0.178355	-0.448384	-0.285762	-0.174573	-0.602319	-0.0863361	0.0350365	0.479905	2.00544	-0.294017	-0.777715	0.0625023	0.316218	-0.0821058	0.724487	1.17347	0.115491	0.510468	-0.424505	0.626525	0.900948	-0.353791	0.580451	-0.374266	0.899769	-1.16236	0.451149	0.290282	2.89944	0.746098	0.05195	1.31888
b0649	djlC Hsc56, co-chaperone of Hsc62	1.07493	0.501117	-0.561843	-2.22685	-2.62269	-0.525628	-0.839992	-3.19628	-2.11402	-2.55479	-0.994987	-0.0332315	-1.84893	-0.651109	-1.05261	-0.0333877	-0.932892	-1.49607	-2.93975	-0.891232	-1.75194	1.92092	0.330969	0.231262	0.250464	-0.00265656	-7.59906e-05	-0.884378	-1.00179	0.539819	-1.34281	-0.538168	-1.22993	0.566822	-0.78233	-1.15387	-1.95229	-0.803492	0.785009	-0.914055	1.91864	0.707133	-0.866084	1.70594
b0650	hscC Hsc62, Hsp70 family chaperone, binds to RpoD and inhibits transcription	0.363523	0.716288	0.46167	-1.08383	-0.292895	-0.0443133	0.80337	-0.478597	-0.812837	-0.851434	0.779387	0.842896	0.56571	0.990368	0.971318	1.2184	-0.282531	-0.290513	-0.470097	0.0216122	1.69774	0.233352	0.532624	-0.794499	0.0812628	-0.0826522	0.0793603	0.786785	0.840457	0.542685	1.43328	1.97523	0.921131	1.61837	0.860225	0.849961	1.0592	0.720891	0.992978	0.661087	-2.07765	0.636237	-2.60822	-1.27607
b0651	rihA ribonucleoside hydrolase 1 (pyrimidine-specific)	0.594124	0.55761	-0.104025	-1.15543	-0.973641	0.0653668	0.929367	-0.556652	-2.361	-0.872321	0.222054	-0.474493	0.384141	0.541053	0.496621	0.900866	-0.390514	-0.143987	-0.12062	0.356064	0.385496	-1.36065	0.653309	0.319555	-0.232602	-0.271079	-0.0627744	1.08718	-1.63794	0.660573	3.79379	4.53674	-1.84197	-0.734365	0.251945	0.64855	0.114674	-0.390842	-1.51163	-0.18704	-1.45352	0.352191	-1.04174	0.451037
b0653	gltK GltIJKL glutamate ABC transporter	-0.00830781	1.47832	0.424111	-1.40404	-0.400393	-0.00238454	-0.285214	-0.696209	-0.420803	-0.41131	-0.048907	-0.0842056	-0.0686829	0.336004	0.39245	-0.322888	-1.29028	-1.36549	0.711245	0.665678	-0.622684	-0.910979	-0.190339	-1.41394	-0.37102	0.000614471	-0.109977	-0.223665	-0.0948726	-0.199296	-1.51997	-1.7014	-0.0819823	0.208102	-0.0743373	-0.610997	1.19865	0.0300029	0.193439	-0.048652	-1.95397	-0.542576	-0.261624	-0.365353
b0654	gltJ GltIJKL glutamate ABC transporter	-0.431075	0.554008	-0.371276	-3.09517	-0.882594	-0.75803	0.186947	-1.60223	-2.9252	1.41354	0.834487	0.313755	-0.86072	0.701162	0.804251	0.63311	-3.45757	-2.5329	2.08216	3.64296	-2.50789	-2.25039	-0.0960682	-4.09586	0.919393	-0.35065	-0.674881	-0.160385	1.58683	1.40665	-3.08168	-3.06926	0.135938	0.864855	0.183855	-0.339007	-4.40788	0.34813	-2.37818	-0.302113	-4.3943	-1.41845	-0.521256	0.749377
b0655	gltI GltIJKL glutamate ABC transporter	-0.397701	0.715924	0.189302	-0.45759	-0.382851	0.462673	-1.36649	0.769865	1.18111	-0.379686	-0.856341	-0.0658341	-0.414918	0.260423	0.156159	-0.522534	1.26383	0.946745	0.0438229	4.328	-1.6059	-0.324948	0.342061	-0.214861	-0.960826	0.247393	0.0130146	-0.301374	-0.48243	-0.598718	-0.825986	-1.06529	-1.22678	-1.75885	0.0300085	-1.35012	-2.58405	0.865675	0.658245	-0.784578	-0.794814	0.279933	0.94046	0.55418
b0656	insH-3 IS5 transposase and trans-activator	0.566787	0.469121	-0.312027	-1.01797	-1.38376	-0.979766	0.334244	-1.59486	-2.82815	-2.64708	-1.1903	-0.064477	-0.862994	1.64741	1.06493	0.00310829	1.75979	1.2651	0.65623	-0.0419601	1.30472	-0.340651	0.490832	0.164058	-0.157924	0.590653	0.634487	-1.01143	0.982845	-0.0904484	-0.00368687	-0.418597	-1.04987	-0.536181	-0.956718	-0.361251	-0.0715372	-0.255054	0.625599	-0.4294	0.389299	-0.137265	-0.277338	0.921273
b0657	lnt apolipoprotein N-acyltransferase	-2.2945	0.705171	-0.31135	0.326926	0.140622	1.20556	0.185306	0.775859	-0.45084	0.482486	-0.144588	0.615222	-0.464654	0.714268	0.824666	-0.23965	2.02485	2.04394	0.192652	-1.22472	-1.3703	0.916856	1.47819	1.11218	1.36892	0.00108748	-0.0385205	-0.354138	0.28783	0.541964	-0.647675	-0.919196	-1.1346	0.978296	-0.851515	-0.0542705	-1.14424	0.632928	0.773593	1.24226	-1.13072	1.44706	-0.0705133	-0.500553
b0658	ybeX predicted ion transport protein	-0.380067	0.587975	-0.728877	1.18533	-0.073829	1.32225	-1.20933	-2.74948	-1.08722	1.49491	1.60521	-1.64397	0.53507	0.227401	-0.0798206	-0.461921	-1.69427	-1.92462	2.79405	-3.02988	-4.94672	-1.20611	0.761661	1.64868	0.208933	0.425463	0.410884	-2.61648	-2.03746	0.424137	-3.49304	LQ	-0.000680322	1.541	-3.64341	0.404117	0.533067	0.0010986	-0.805182	0.339298	-5.2946	0.956874	-2.34614	-4.44234
b0659	ybeY conserved protein	-0.488556	0.87298	0.573819	1.34444	0.172425	-0.383519	-0.975145	-0.825215	-0.923327	0.559502	0.272896	-0.778123	-1.4735	-0.783912	-0.440697	-1.17246	-1.6635	-0.972643	0.569395	2.67671	-2.04328	-1.1893	0.497021	0.0844196	0.0428654	-0.0722596	0.176797	-0.656471	-0.740544	-0.60742	-1.70092	-1.64428	0.0682538	0.527432	-1.11466	-1.0268	-1.37782	-0.330905	-1.42565	-0.272914	-1.61735	-1.57524	-1.25049	-0.915219
b0660	ybeZ predicted protein with nucleoside triphosphate hydrolase domain	-1.60406	1.00409	3.08031	3.26487	0.906091	1.14078	1.61997	0.690696	-0.0904206	2.12331	-0.179083	-0.211889	0.495494	1.43218	1.35533	0.77634	-0.278237	-0.386096	0.621016	2.74432	-0.528272	0.777351	1.52598	1.37641	1.48556	1.39015	1.43135	0.411692	0.192054	0.108909	-0.976783	-1.14945	0.284391	1.0194	-0.862876	1.57195	0.3827	1.23549	1.52568	0.0540376	-1.48859	0.395975	-0.51487	0.569737
b0661	miaB isopentenyl-adenosine A37 tRNA methylthiolase MiaB	-0.244874	0.512601	0.720702	LQ	-0.072876	LQ	0.850067	1.4946	-0.583079	1.41189	0.223307	0.852317	0.975731	0.672889	0.0477253	-0.735764	0.265786	0.640842	0.831645	-0.281659	-0.887882	-0.401173	1.30534	LQ	1.11403	0.137469	-0.0781224	-0.854625	1.73679	0.715572	-2.25201	-2.17724	0.010308	-0.353265	-0.641314	0.170604	-2.07679	1.2801	-0.0979893	1.32649	LQ	0.93292	-0.0493759	-0.111102
b0662	ubiF 2-octaprenyl-3-methyl-6-methoxy-1,4-benzoquinone hydroxylase	-0.882775	0.392386	8.63397	10.2926	6.9708	5.54829	11.0965	12.1148	5.65879	8.05707	0.172761	1.01785	0.138439	-0.0103585	0.323286	-0.0283862	-0.0962432	0.705762	1.70439	-1.25124	-1.02411	0.907972	1.56764	0.387059	1.04596	-0.0855895	0.234139	-1.01778	1.27805	1.70989	-1.67972	-1.32741	-1.07071	-0.14016	-0.543235	0.55844	-1.52232	1.68696	-0.775164	1.22228	-1.14206	-0.20004	-0.172611	0.142721
b0667	b0667	-0.221748	0.353557	-0.410179	0.218116	0.105064	-0.207561	0.138697	LQ	0.812689	1.51199	-0.222146	2.20485	-0.256788	-0.579116	0.585121	-0.364874	1.84405	1.5447	1.33766	-0.608453	0.331304	-0.24581	1.02787	-0.109938	1.33866	-0.280411	0.227038	-0.504318	2.10905	2.05983	-1.41906	LQ	-0.897709	0.056975	-1.32989	-0.17361	-0.0772542	2.80018	LQ	1.44724	-0.768888	-0.600249	-0.141842	-0.387795
b0669	b0669	-0.21608	0.31515	-0.327508	LQ	0.109878	LQ	-0.0970247	LQ	1.38712	LQ	-0.0688568	2.5869	-0.0411876	0.360736	0.532686	-0.43256	2.69656	1.52573	1.60515	-0.458506	0.0482022	LQ	1.32066	LQ	1.63631	-0.0584524	LQ	-0.321591	2.46063	2.2876	-1.1077	LQ	-0.567769	0.0443468	-1.08894	LQ	LQ	3.23892	LQ	1.60139	-0.9257	-0.338179	LQ	-0.272308
b0671	b0671	-0.353409	0.463237	-0.867162	0.603333	-0.337316	0.461321	-0.0570426	0.300755	0.372686	1.09138	-0.909378	1.30409	-0.961442	-0.201431	0.404838	-0.942624	-0.123906	0.390335	0.703095	1.81594	-0.643649	-0.0982926	0.690738	-0.243983	0.529494	-0.713013	0.249307	-0.846601	1.1133	1.06659	-1.37715	LQ	-1.09042	-0.189794	-1.59707	0.435451	-0.470432	1.67463	-1.2301	0.93913	-0.760817	-1.18734	-0.0511487	-0.372312
b0674	asnB asparagine synthetase B	0.00190927	0.651742	0.594445	-0.517312	1.1241	0.954058	-0.808756	1.08944	0.625328	0.239584	0.364167	-0.52956	0.610727	-0.0229451	-0.395893	-0.0218062	-1.24378	-1.36367	-0.32611	-1.66084	-1.50827	0.0167328	1.17019	-0.125424	-0.349458	0.470185	0.476003	0.807118	-0.476543	1.53562	-3.47922	-3.76949	0.121114	-0.429759	-1.99094	-0.0213303	2.02113	0.874833	-0.817793	0.114229	-2.40535	0.550073	-0.0161595	-0.261797
b0675	nagD ribonucleotide monophosphatase	-0.221019	1.19687	0.553431	-0.536067	-0.207117	0.42186	-1.87639	-0.426832	-0.0427939	-0.519915	-0.0193284	-0.723587	-0.277435	-0.657215	-0.681749	0.0919286	0.160979	0.322348	-0.164337	1.17608	1.53528	-1.32576	0.106841	-0.121696	-0.732974	-0.206589	-0.0999469	-0.406263	0.762126	0.3596	-1.61075	-1.66041	0.396809	-0.284428	-1.71297	0.350515	0.563164	-0.144696	0.113922	0.302267	-2.06036	0.0976163	-1.19714	0.66665
b0676	nagC NagC transcriptional dual regulator	-0.811401	1.23963	-0.878859	-1.27099	-0.0159037	-0.570472	-1.37402	-0.679055	0.0715396	-1.57716	1.05847	0.542294	0.461941	-0.403197	-0.313665	1.4006	0.724837	0.981359	0.618703	1.07092	-0.0594885	0.493206	0.545691	0.386684	0.348955	0.758603	0.809611	0.657284	0.365334	0.132487	-2.74981	-2.83192	-0.373762	0.677833	0.918369	0.537345	-0.991978	0.367111	0.205113	0.511673	-2.3667	0.0615632	0.0679169	2.53584
b0677	nagA N-acetylglucosamine-6-phosphate deacetylase	-0.598593	0.764897	-2.40526	-1.11164	-0.885531	0.0654835	-2.7315	-0.671185	-0.618327	0.508926	1.32744	1.43565	0.229445	0.65357	0.557401	1.39826	0.875457	1.01268	1.10411	2.24938	2.7643	0.344274	0.926037	0.938561	1.25287	0.387427	0.583581	0.570149	0.939199	0.575082	-2.07867	-2.14192	-0.142819	1.1445	-1.00463	0.76459	-1.81461	1.11215	0.198382	1.08982	-2.07781	0.315051	0.953669	3.88308
b0678	nagB glucosamine-6-phosphate deaminase	0.408144	0.661691	-0.157678	-2.29507	-1.02018	0.414562	-4.84529	-0.427188	-0.694246	-1.67976	-1.06486	-0.52244	1.00856	-0.929539	-0.968351	-0.242662	1.54255	2.21464	-0.107653	-1.30967	2.88648	0.663956	0.105666	0.242705	-0.158551	-0.396899	-0.461199	1.25785	0.894085	-0.503071	-3.68305	-3.62393	0.700014	-1.11182	1.56715	1.52345	-2.77915	-0.446977	-0.147011	-0.422403	-3.55552	0.365155	0.886531	1.62289
b0679	nagE N-acetylglucosamine PTS permease	-0.567336	1.10452	0.844753	0.926705	0.101412	0.682226	0.382585	-0.361953	-0.316995	-0.0571868	0.224608	0.909944	0.362956	0.220111	0.268029	-0.056165	-1.28071	-1.10432	-0.0315226	-2.60558	-2.26722	-0.450987	0.744161	-0.541297	0.102763	0.00302906	-0.109513	-0.0710839	1.46956	-0.423996	1.04508	1.21904	-0.927135	0.538225	-1.26163	0.208888	-1.69255	0.192103	1.0941	0.326771	-2.62175	0.029484	0.29103	-1.88608
b0680	glnS glutaminyl-tRNA synthetase	-1.57924	0.579519	-1.0367	0.170671	0.189942	1.00079	-0.205414	0.50077	-0.525703	1.89817	-0.137302	0.555652	0.520877	-0.220966	0.134649	-1.25437	-0.201751	-0.134925	0.087103	-0.904863	-1.2079	1.04131	0.708774	1.61356	0.268471	0.0886097	0.092001	0.0725203	0.512481	0.426381	-1.20758	-0.712513	-0.576684	0.239837	-1.50452	0.798054	-0.893609	1.01008	-1.12247	0.0943641	-0.930731	-1.04221	-0.620539	-1.30738
b0681	ybfM predicted outer membrane porin	0.26913	0.748717	-0.474128	-0.338608	-0.615693	0.0312977	-2.12888	-0.759504	-0.361704	-1.45708	-0.151553	-1.7738	0.222293	-0.860274	-0.824136	-0.0374017	1.53716	1.28398	-0.198742	0.21839	-0.310351	-0.571831	-0.205186	-1.67727	-1.03869	-0.651822	-0.784051	-0.267465	-0.108551	0.212786	0.686026	0.832449	-0.750103	-1.68904	-0.667512	0.917118	-0.357338	-0.254021	-2.11066	0.0832868	-3.26968	-0.947991	-0.961066	0.521823
b0682	ybfN predicted lipoprotein	0.130315	0.37688	-1.76116	LQ	-0.180897	LQ	-1.68403	LQ	0.988654	0.245358	0.541151	1.90258	0.298507	-0.045482	-0.174218	-1.37255	-1.1865	-0.435734	0.864403	0.0581446	1.35317	-0.952104	0.425792	LQ	0.413884	-1.29108	-0.633384	-0.913949	1.25935	1.06195	-0.0354859	LQ	-0.83609	-0.538989	-1.86782	-0.890701	-2.02109	1.61741	-1.75129	1.18619	-1.91504	-1.62867	-0.254753	-0.792455
b0683	fur Fur-Fe+2 transcriptional dual regulator	-0.45337	0.912943	0.256973	LQ	1.42747	LQ	0.566774	LQ	1.74913	1.49935	0.642678	0.391755	1.94578	0.824523	0.622297	-0.0841809	-0.674287	-0.422643	0.0191711	-0.957184	-0.300199	-1.23877	0.0305297	-0.861084	-0.38059	-0.725205	-0.375223	1.67609	0.381445	2.23515	-0.969799	LQ	0.547158	-0.337058	-0.657361	0.172683	-1.74728	0.442092	LQ	0.0603987	1.70087	0.499997	0.961966	0.647024
b0684	fldA oxidized flavodoxin 1	-0.974619	0.762023	-0.464584	-0.254301	0.64797	0.484011	-0.0800614	0.94668	1.7599	1.63234	0.722563	0.40086	1.13895	0.575279	0.733033	-0.0830083	-1.13979	-0.753261	0.820387	-1.3234	1.72412	-1.19696	-0.0970872	-0.969299	-0.547215	0.283399	0.252147	0.382936	0.224837	-0.00839055	-0.822621	LQ	0.0386546	-1.08056	1.25736	-0.38182	-0.206673	-0.0113176	-1.45819	-0.0679955	-0.647819	-0.501523	-1.03717	-0.0871902
b0685	ybfE LexA-regulated protein	-0.803578	0.524447	0.715275	-0.342217	0.67744	1.29957	-0.583119	0.235421	-0.359465	0.370073	3.37574	0.805568	2.57299	2.07358	2.34945	-0.338238	2.99272	2.71916	2.89008	-1.29932	0.794351	-1.09999	1.50576	2.22832	0.223828	-1.1777	-0.330157	-0.255721	0.536606	0.586439	2.86412	3.00623	-0.669899	-0.646236	-2.73215	1.40419	-1.376	0.751235	0.787841	2.83771	-1.21327	-0.542662	-0.701131	1.9843
b0686	ybfF esterase	-0.492862	0.613516	0.411256	-0.171688	-0.24734	1.45582	-0.714738	LQ	-0.378213	-1.04064	0.701247	1.48016	-0.0897965	0.514265	0.725741	-1.19748	-2.18084	-1.06936	0.539436	-0.171327	-2.6873	-1.76486	0.774513	0.41876	0.494421	-0.347113	-0.245035	-0.122106	-0.752088	0.35886	-2.37216	-1.40332	-0.86808	-0.827269	-3.04938	-0.805334	-1.50689	1.23357	0.583368	1.53741	-1.89309	0.831564	-1.02311	-1.49907
b0687	seqA SeqA, negative modulator of initiation of replication	-1.3173	0.960591	-0.239345	0.401648	-0.0862598	0.554699	-0.478995	0.389189	0.0866768	0.20671	0.285848	0.0883721	0.957706	1.07514	1.02299	0.27021	-0.469623	-0.113498	0.0193356	-1.05177	LQ	-1.12354	0.335142	-0.433124	-0.192956	-1.17518	-0.588625	-0.579426	-0.0385532	-0.0276719	-1.60116	-1.08192	-0.544829	-0.440799	-1.52949	0.0111415	-1.03568	0.673964	-0.835147	0.159851	-1.13493	0.484955	2.21095	-0.434235
b0688	pgm phosphoglucomutase	-1.10894	1.07752	0.188811	-0.725214	-0.324015	0.119238	-0.77263	LQ	-0.404904	0.234671	0.932498	0.710897	1.6987	1.71151	1.58618	-0.60355	-0.569923	-0.529511	-0.164144	-1.71177	-1.31943	-1.75969	0.636988	0.513363	-1.05573	-0.826497	-0.302933	0.588024	-0.940626	-0.399543	-1.57263	-1.24235	-0.497696	-1.47149	-1.28677	-0.711067	-0.974858	-0.661244	-0.109215	-0.885674	0.158308	1.01554	0.186438	-0.332446
b0690	ybfG	1.7495	0.504398	1.65921	LQ	-1.80066	-1.3044	-2.19651	LQ	-1.66568	-0.936514	0.63147	-0.684343	1.16345	-0.00916066	-0.658024	0.91652	0.0973254	-0.950911	1.33507	-1.09591	-0.94003	-0.457275	-0.315021	-0.259253	-0.336803	-0.666716	-0.657075	-1.42841	0.139282	0.271168	-0.76317	-0.344412	-1.49045	-0.842214	-2.36268	-0.0814722	-0.979164	0.153496	LQ	-0.91273	LQ	1.40177	-0.1002	0.709573
b0691	ybfH	2.05196	0.41241	-0.128989	LQ	-1.84685	-1.48103	-3.26742	LQ	-1.80409	-2.43859	1.88786	-3.20531	1.59167	-0.0450947	-0.447935	0.910985	-2.11754	-2.4225	0.728447	0.882227	1.69402	-1.20145	0.200416	-0.414236	-0.507435	-0.246237	0.458847	2.09322	-0.992236	0.863711	-1.29402	LQ	0.127335	-0.775959	-3.3991	0.371559	-0.256203	1.18443	0.85492	-1.08168	3.33829	3.27825	-0.287328	3.11705
b0692	potE putrescine/proton symporter: putrescine/ornithine antiporter	0.834357	0.459973	1.34115	-0.189902	-2.37807	1.09188	1.22909	0.2415	-2.04029	-0.887632	1.04255	-0.28105	0.812894	0.033129	0.929828	0.703156	-2.1719	-1.99924	0.612899	3.15024	-0.626625	-2.76388	1.04568	1.82683	-0.697386	-0.59714	-0.253763	0.0170973	-1.12998	-0.0282128	-3.09475	-3.31417	-1.32816	-0.81218	-0.434516	0.22231	-0.548952	1.18835	-2.5949	0.409021	-3.83015	2.19063	-1.92013	-0.0651385
b0693	speF ornithine decarboxylase, degradative	0.176288	0.466701	1.12572	-0.177018	-0.0407562	0.416626	-1.97372	0.753952	-1.56905	-3.85213	0.622294	-1.23849	1.0841	1.31905	1.05659	1.02984	0.694892	0.453289	-0.461885	2.6299	0.395266	-0.0953943	0.706392	0.372967	0.301487	1.41257	1.61846	0.115769	0.856508	0.110632	0.562134	1.51334	0.905923	0.640433	1.91239	-0.130693	-1.12278	-1.25285	1.05189	-1.20528	0.245758	1.88749	1.82925	-0.128173
b0694	kdpE KdpE-Phosphorylated transcriptional activator	0.0115872	0.661669	0.235686	-0.427243	-1.62202	0.346119	-1.64494	-0.136918	-2.73204	-1.22994	0.745309	-0.379365	0.786724	0.174211	0.419422	-0.13083	-0.838584	-0.410768	0.247378	-1.63701	2.62767	-1.26824	0.234308	-0.912492	0.145222	-0.308792	0.119639	0.843724	0.619469	0.566032	0.636379	1.16619	-1.20152	-1.29269	-1.32015	-0.74202	-0.0276103	0.316504	-1.06779	-0.95383	2.88152	-0.525564	0.452987	1.51293
b0695	kdpD KdpD-P his	-0.863242	0.614369	-0.113216	LQ	-0.276428	LQ	-1.34863	LQ	-3.18456	0.354423	0.124381	1.01125	0.604495	0.32249	LQ	-0.196512	-1.01292	LQ	0.700405	-0.172018	0.728836	0.289848	1.14903	1.31196	1.31426	0.414542	0.563659	0.955805	2.31893	1.37007	-0.605945	0.361594	-0.749596	0.800301	1.36801	-0.0917237	0.701578	0.95748	-1.89782	0.435148	3.5056	-0.267289	-1.08481	1.80983
b0696	kdpC potassium ion P-type ATPase transporter	-0.876203	1.06501	0.879134	0.00822836	0.643604	0.643046	-1.19364	-1.0486	0.426622	0.746435	0.425504	1.78686	1.21327	0.691972	0.629496	0.734117	-0.663765	-0.675141	-0.389093	-1.73008	-1.27577	0.832394	1.55345	0.645578	0.553363	0.859609	1.03734	-0.70535	0.266937	1.02428	-0.302652	-0.452099	-0.526355	1.98029	-1.54016	0.193864	0.646037	1.01832	-1.12249	0.867776	0.0914265	1.17274	-1.07773	0.230095
b0697	kdpB potassium ion P-type ATPase transporter	-0.670868	0.628233	1.64172	-0.537574	0.00825608	0.886205	1.55445	-2.08298	-1.00956	0.0756127	0.663719	1.87987	1.6479	1.12958	1.11283	-0.761663	0.367579	-0.0161012	0.67667	-1.2837	1.44897	0.0550897	1.13548	0.262148	0.190811	0.565896	0.449227	-0.689722	-0.892558	1.68651	1.83325	2.15067	-0.618946	0.703412	-3.48739	-0.382198	-0.481287	1.16027	1.73892	0.204638	-4.1168	1.60106	-3.23662	-1.08621
b0698	kdpA potassium ion P-type ATPase transporter	0.344848	0.74243	-0.325674	-0.713615	-1.07903	-0.881028	-1.50067	-1.19305	-4.06659	0.152865	-0.370732	0.496201	-0.549306	-1.72397	-1.78585	0.159155	-1.14585	-1.47966	-1.30696	-0.874621	0.95328	-2.84518	-0.358293	-0.184152	0.524746	-0.987696	-1.04523	-0.638193	0.704718	-1.06426	-0.436479	-0.658521	1.00526	-0.0204453	-0.135628	-0.54054	-1.2089	-0.26178	-1.05421	-0.641576	-5.47478	-1.5738	-2.57135	-3.50557
b0699	ybfA predicted protein	-0.30807	0.381092	-1.15127	LQ	-1.54428	0.998119	-1.13007	LQ	0.990121	1.78405	2.41064	2.28342	0.793775	0.367288	LQ	-0.0582228	-1.15285	-0.952087	0.487963	-1.35018	-1.17338	-1.0429	0.460308	2.31809	0.72062	0.184413	0.737137	0.0205497	1.68478	2.12923	-1.58191	-0.67183	-0.237744	-0.240322	-2.03997	0.237251	-1.40741	2.33183	-1.04242	0.214221	-1.73126	0.958509	-0.676533	-0.123661
b0701	rhsC_2 RhsC element protein	1.29036	0.591759	-1.87231	-0.904036	-0.530666	-0.145096	-2.16891	0.250597	-0.181466	-2.40914	0.437114	-1.86714	0.966344	-0.0255043	-0.218287	-0.812397	0.939857	0.93465	0.134507	-2.09288	0.163996	0.264754	0.294693	0.193445	-0.362181	0.177604	-0.179255	1.60143	-0.261607	-0.12204	2.14495	1.98132	0.00222506	-0.931613	0.675151	0.699691	0.180192	-0.720543	0.153128	0.397042	-2.93599	0.11784	0.181852	0.884521
b0703	ybfO putative rhs protein	1.3911	0.488922	-0.334212	-1.3576	-1.90321	-0.589553	0.311484	-0.208036	-3.17519	-0.887535	-0.551846	-2.85397	-0.144027	0.451839	0.204594	0.341306	-1.24092	-0.535761	1.31138	1.85551	0.355693	-0.186294	0.730575	0.304845	0.370399	-0.111245	1.05614	-0.00522036	0.168189	0.416205	0.212692	1.10581	-1.4663	-0.942093	-1.32251	0.663261	0.926154	1.34908	0.860814	-0.443071	-0.126518	1.03176	0.203548	0.740285
b0704	ybfC predicted protein	1.68298	0.94229	-2.93283	LQ	-1.03989	-1.92878	-2.47032	-0.337611	-2.189	-2.29683	-1.45791	-1.99408	-1.5672	-0.737235	-0.761792	-1.49	-1.16212	-1.23786	-2.07248	1.14003	-1.54389	0.883966	-2.19662	0.147985	-2.02078	-0.157374	-0.0249265	-0.3499	-1.59278	-1.97868	1.1005	1.06394	0.756507	0.349091	0.124335	-0.770644	0.0499715	-1.60504	0.64658	-2.03596	-0.401889	-2.72562	1.40335	-2.54424
b0705	ybfL predicted transposase; receptor protein	2.14774	0.480833	-3.96418	LQ	-1.46653	LQ	-2.9197	LQ	-2.46585	LQ	-1.71579	-3.55345	-0.21533	-0.308239	-0.977455	-1.39837	1.74375	0.678624	-2.71547	-1.24234	-0.13206	1.25867	-2.02711	0.662602	-2.82139	0.522461	-0.992752	3.06371	-1.16585	-3.13748	3.81433	2.70654	-0.334453	0.292774	1.94749	0.330181	LQ	-2.74472	0.331636	-1.83045	3.42372	-2.47624	2.59757	-2.04896
b0706	ybfD putative DNA ligase	1.6752	0.577335	-3.19981	-2.40167	-0.804773	-2.76617	-1.86438	-1.94079	-1.69424	-3.30267	-0.864107	-1.94328	-0.318792	-0.706648	-1.5548	-0.691139	0.728909	-0.270251	-2.24326	-0.708742	0.162146	-0.592743	-1.23858	-1.65641	-1.18339	0.567256	-1.016	1.84254	-0.356346	-2.54947	1.95984	-0.333972	0.759063	0.330734	2.22028	-1.11668	-1.09738	-2.1691	-1.223	-1.01672	0.285947	-1.07861	2.25258	-0.891353
b0707	ybgA conserved protein	1.47805	0.661312	-2.74732	-1.28138	-0.323567	-2.35761	-3.07031	-2.09119	-3.56066	-3.58561	-0.677669	-1.04952	-0.27721	-0.833891	-0.936873	-1.62776	-0.11125	-0.668228	-2.82968	-1.54933	-1.87087	-1.14385	-1.30804	-0.0962086	-1.01334	-1.30456	-0.873671	-0.316697	-0.95001	0.939732	-1.46398	-0.986969	0.0457795	0.552498	1.77634	-0.276178	-1.0594	-0.417998	1.40722	-0.652362	-2.61608	-2.48817	0.972107	-2.35925
b0708	phr deoxyribodipyrimidine photolyase (photoreactivation)	-0.663663	0.859966	0.583146	-0.0968908	0.46011	-0.300535	-0.79057	-0.275043	-0.0226768	-1.00329	0.120917	1.18593	0.335515	-0.354611	-0.130628	-1.00201	0.0220738	0.457745	0.161042	-1.4394	0.313618	-0.930249	1.08671	-0.914817	0.356762	0.0471586	0.210247	0.587981	0.356221	-0.528855	-0.598773	-0.0877985	-0.0871155	-0.177053	1.48285	-0.541054	-0.0486284	0.781796	-1.89269	0.300457	0.171252	-0.354625	1.01767	1.06257
b0709	ybgH YbgH peptide POT Transporter	1.01569	0.273736	1.54578	0.756698	1.11622	-5.17849	-8.95462	-6.24099	-11.7213	-4.39062	-1.51706	-10.4015	-2.35214	-1.64216	-0.641541	-5.26059	-0.11317	1.96085	-0.00671247	-15.5561	-0.133405	3.42373	-2.63229	1.55893	-0.722031	-1.86829	0.0296111	-3.84386	1.84476	-0.574609	2.58312	4.16097	2.68563	2.11746	2.44185	0.0485245	-6.62935	-0.859913	0.00116547	-1.64133	-11.1231	-4.09051	4.61121	-1.79741
b0710	ybgI conserved metal-binding protein	-0.354685	1.00791	-0.343912	-0.193073	-0.832345	0.266639	-0.721728	0.0372129	0.312998	-0.590909	0.457674	-0.0410835	0.230076	-0.0883284	0.203366	0.00100909	-0.913912	-0.321414	-0.379576	-1.05757	-1.2383	-0.425594	0.217096	0.528766	0.0908441	-0.0743428	0.334691	-0.206668	1.28425	-0.48767	-0.523483	-0.193096	-0.170506	-0.552918	-1.34267	-0.595027	0.866937	-0.365168	-1.13045	0.00222986	-1.76301	0.576381	-0.210601	1.06927
b0711	ybgJ putative carboxylase	-1.25408	0.902588	-0.895717	1.47464	-0.337721	0.663608	-0.372315	-0.0558556	-0.877577	0.997763	0.966593	0.137132	0.9699	0.364934	0.534288	-0.223811	0.84297	1.05974	1.09312	-2.33857	-0.0273502	0.457551	0.641	0.956145	0.387417	0.0602765	0.22452	-0.64477	1.56296	1.0888	1.85472	2.10905	-1.01555	-1.11621	-1.42195	-0.346974	-0.414726	0.101097	0.608305	0.842269	-1.64541	0.519604	-0.911446	0.0619971
b0712	ybgK putative carboxylase	-1.00161	0.771827	0.184682	-0.83081	-1.14535	-0.196159	1.55115	-0.817289	-2.02232	0.575969	0.823485	2.20044	-0.117996	0.636446	1.05439	0.308199	-0.844859	-0.325057	1.11528	-2.35033	-2.00925	-0.815072	1.3863	0.444559	0.764989	-0.545661	0.00491442	0.275073	0.311006	1.27242	-1.70702	-1.4595	0.501681	-1.27631	1.18662	0.376697	0.373328	1.08508	-2.01601	0.81597	-1.78926	1.89009	-0.84342	1.71069
b0713	ybgL predicted lactam utilization protein	-0.736005	0.827705	0.539676	0.280373	0.6519	0.00373356	0.247899	-0.487524	-0.415653	0.666693	1.21204	1.70218	0.263511	0.965331	0.864004	0.323412	-0.875007	-0.544167	-0.783623	-1.30121	0.891536	-1.33719	0.813507	0.476151	1.51602	-0.487475	-0.282309	1.10439	0.379866	0.743248	-3.01858	-2.79967	0.956411	-0.251115	2.03752	0.538091	-1.78529	0.424185	0.783234	1.43012	-2.46501	-0.205116	1.11229	1.09288
b0714	nei endonuclease VIII	-0.693746	1.04727	1.10847	0.11453	0.71404	-0.00164517	1.07586	-0.983821	0.302638	-1.08232	0.784115	-0.701963	-0.368385	0.11116	0.0422467	0.328166	0.74369	0.614372	0.274394	-1.39362	2.56996	0.777777	0.415598	0.805829	0.53717	-0.204662	-0.258995	0.177098	-0.770742	-0.993282	-2.3061	-1.59149	1.21153	0.849672	-0.0059004	-0.434679	1.17315	0.462391	-0.414208	0.662555	-0.883111	0.999781	-1.58822	-0.379541
b0715	abrB predicted regulator	-1.14664	0.99095	0.24998	0.742917	0.633388	0.451546	-0.861915	0.450331	-0.455381	-0.133409	1.27037	-0.388382	1.63601	0.433086	0.244617	0.501148	0.614239	0.816845	-0.131506	-0.496195	0.0923738	-0.962758	0.899148	0.440565	0.802882	0.421898	0.673303	0.58046	-0.729801	-0.99068	-0.910004	-0.267132	-0.133943	0.776252	-1.16183	0.65726	-0.899306	1.10715	-1.00032	0.898201	1.75572	1.13693	-0.370487	-1.07542
b0716	ybgO predicted fimbrial-like adhesin protein	1.65896	0.449339	-2.16281	-0.187902	LQ	-0.382703	-1.70941	0.66299	LQ	-4.35395	-0.696742	0.560569	0.460489	-1.26622	-1.04583	-0.386905	0.04368	0.164091	LQ	-1.3772	-2.76661	-1.42656	0.437832	1.77908	0.304467	-0.994411	-0.730176	1.76675	-0.296275	-2.1848	3.00742	3.57503	-1.19238	-0.568302	0.743786	1.54563	-1.33622	-1.53643	0.237808	-0.188169	2.39338	-0.508271	2.85107	-1.66969
b0717	ybgP putative chaperone	0.235233	0.571022	-0.465495	-0.206597	-0.63839	-0.138063	-2.4348	-0.636239	-0.474192	-0.361349	-1.0422	-0.334706	0.779624	0.850144	0.661759	-0.373474	0.071754	0.0283683	-1.55771	-2.32483	0.27268	1.28963	-0.451923	0.191878	-0.520802	0.144511	0.098863	-0.125468	0.340201	0.850302	-2.826	-2.36659	-0.563872	-2.18358	-0.891188	-0.0833457	1.25946	-0.521335	0.212142	0.0298905	-2.76968	0.869064	-0.278056	-0.972913
b0718	ybgQ predicted outer membrane protein	1.35036	0.512621	-1.63171	-1.87778	-1.64765	-0.149608	-6.09512	-0.87457	-2.54409	-3.1499	-0.828561	-0.748418	-0.978994	-0.0880013	0.0878601	-0.870297	0.105866	0.416013	-1.29394	0.0742317	0.566736	-1.37099	-0.30607	-0.285983	-0.460974	-0.00453656	0.261218	-0.713241	-0.581107	-1.28902	-1.02937	-0.705725	-0.561701	-1.88054	-1.23511	-0.553908	1.41219	-0.547108	-0.105782	-1.13805	-1.79097	-0.178431	-2.73338	-1.16091
b0719	ybgD predicted fimbrial-like adhesin protein	2.10561	0.397561	0.411667	-1.19284	-0.828431	-1.09055	2.28141	LQ	-2.9489	-3.88317	1.49632	0.667582	0.907936	-0.574839	-1.31424	1.25287	0.166515	-0.181957	0.0520668	-2.81263	0.286075	0.855112	0.0124639	0.137103	1.09041	0.944199	0.678742	1.1814	-0.4176	0.397295	2.17699	1.93556	1.29632	-1.90727	0.434607	0.269619	1.49949	-0.940031	-1.6069	-0.310384	0.253783	2.13826	1.31978	1.7873
b0720	gltA citrate synthase monomer	0.682295	0.413836	0.205526	1.11608	2.34238	1.66404	0.84963	-3.54265	-0.489241	-2.71677	0.0736848	0.873985	0.705735	1.32088	1.20217	1.71651	3.3222	4.07999	-1.20026	2.2197	-4.83998	0.343363	-1.67318	-1.87322	-0.659596	0.371667	1.18914	1.29459	-0.276504	1.95625	0.860032	1.44993	0.808714	-1.39911	0.80057	-0.1372	0.0142937	-2.1178	-0.619956	-3.03549	1.11323	-2.60793	2.94245	2.1147
b0721	sdhC succinate dehydrogenase membrane protein	-0.550403	1.23327	-0.456097	1.6921	2.39357	2.74412	-0.309875	0.579899	2.65212	LQ	0.354551	1.7028	-0.773536	-0.405803	-0.643862	-0.219495	-0.291401	-0.481472	-0.331258	-0.693163	-1.2119	-0.667046	1.42374	0.608725	0.522202	-0.448226	-0.387932	1.12978	2.63879	1.73991	-0.2258	LQ	0.159498	1.31199	0.31141	0.295261	-0.118208	0.735966	-1.01711	2.04461	-1.1292	0.611632	-0.974271	-0.249115
b0722	sdhD succinate dehydrogenase membrane protein	-0.234068	1.08113	-0.182884	0.201089	1.6851	LQ	-0.505808	-0.816515	0.355573	LQ	-0.149189	0.470531	-1.11434	-0.868227	-0.808019	-0.712414	-0.561234	-0.728575	-0.45048	-1.44087	-1.32434	-1.57551	0.0351233	0.292668	0.239618	-0.740109	-0.800021	-1.04735	0.296978	-0.387956	-0.957823	LQ	-0.759093	0.205474	-1.48802	-0.647774	0.42863	1.63354	-1.66335	0.980407	-1.70398	-0.50596	-1.54813	-0.485511
b0723	sdhA succinate dehydrogenase flavoprotein	-1.19463	0.626786	3.00683	1.75647	4.55487	4.79377	3.62845	-0.336307	2.90265	4.86023	-0.0429073	-0.839489	-0.473368	-1.31424	-1.47192	0.668268	-0.787517	-1.19278	0.471218	-3.84075	-3.18398	-2.88069	1.03059	2.25352	0.808593	-2.01637	-1.84099	-1.15655	-0.743672	0.278282	-2.91699	-2.92246	-0.75141	1.75569	-3.30286	0.305316	1.63876	0.368581	-4.03811	0.105772	-3.66866	1.93475	-1.48095	1.40151
b0724	sdhB succinate dehydrogenase iron-sulfur protein	-1.64967	0.792487	2.72941	1.49938	4.26899	4.36135	3.36753	1.16896	4.80895	3.99487	0.0990267	0.488025	-0.201283	-0.038707	-0.0826897	-0.493735	0.61936	0.637407	1.59436	-1.12468	-1.48501	-0.624803	1.6077	0.873431	0.105624	0.327728	0.421489	0.484575	0.30058	3.8872	-1.57051	-1.54433	-1.17789	-0.463499	-0.992467	1.04951	0.403542	2.04244	-1.29718	2.2915	-0.514261	1.1083	1.15098	-0.857535
b0725	b0725	-0.669769	0.452971	4.11296	LQ	2.2941	2.17824	0.0909635	LQ	5.86386	3.59004	-0.223889	1.647	-0.605417	-0.344617	-0.0356694	3.60621	0.145852	-0.00496732	0.973262	-0.873363	-1.52479	-0.605844	1.67512	-0.568414	0.982984	0.124145	-0.170304	0.228677	1.48281	1.62708	-0.767447	-1.10083	-1.21135	-0.0587108	-1.03916	0.97172	-0.763721	1.99793	-0.911488	1.23795	-0.626864	-0.974761	-0.161752	-0.267607
b0727	sucB SucB-lipoate	-2.6903	0.560414	1.74788	-0.0787795	2.63473	2.83904	-0.105048	0.990857	2.528	1.84896	1.48405	1.48114	0.154736	0.327953	-0.262418	1.12301	2.00717	2.17455	0.984999	-1.03764	-1.14407	-0.682251	1.55618	-1.03233	1.08085	1.29258	1.24549	0.930402	1.21452	1.78218	0.415275	-0.263594	-1.31657	3.18688	0.216181	1.72841	-0.396437	2.30768	-1.38622	1.53117	-0.83072	0.839083	-0.43413	-0.458311
b0728	sucC succinyl-CoA synthetase, beta; subunit	-1.6633	0.716677	-0.250029	0.0665739	0.351986	1.4447	-0.840345	-0.102954	-0.666652	0.317122	0.49676	0.0311383	0.59568	-0.756123	-0.600938	-0.543818	4.10774	4.06778	1.55354	-2.11608	-1.29691	-1.03587	1.04301	-0.638873	1.17192	-1.07884	-0.6868	-0.0415552	1.36692	1.83984	-1.85083	-1.65444	0.0931791	-1.4397	0.592608	1.2112	1.39959	0.997431	-1.89233	0.435727	-1.92791	2.04971	-1.37855	-0.938919
b0729	sucD succinyl-CoA synthetase, alpha; subunit	-0.84135	0.834955	1.50192	-0.148685	0.514594	1.69243	-1.91007	1.85051	-0.800443	0.954989	0.225044	-1.01404	0.917964	0.536037	0.068523	0.93916	-1.84617	-1.43219	2.67311	-1.98596	-1.05339	-1.53769	1.63317	-0.940737	1.22456	-0.11068	-0.372356	1.19958	0.592188	-0.40201	0.597508	1.01092	-0.362047	-2.28402	-1.80681	-0.353272	-2.52142	1.07136	-0.777936	1.66244	-2.37307	3.31089	1.09882	-0.87013
b0730	mngR MngR-acyl-CoA	-1.65775	0.616516	-1.33955	1.83241	2.4705	1.20881	-1.5162	1.39807	0.451861	0.318631	0.693715	2.03864	2.18919	1.65795	1.77533	0.0332468	-0.0515442	-0.647888	1.27323	1.25372	-1.40265	-0.640222	0.699086	1.90679	0.588081	1.15325	1.12586	0.224115	1.41166	1.77456	-1.05027	-0.22894	0.00294586	-0.784974	0.481033	1.06082	-1.5868	2.30589	-1.41163	2.92963	-0.608691	2.50877	-1.00362	1.07085
b0731	mngA 2-O-alpha;-mannosyl-D-glycerate transporting phosphotransferase system	-0.24402	0.881917	0.0162296	0.468976	0.0533406	0.228144	0.499786	0.992761	-0.244021	-0.204709	0.395983	0.835244	0.244633	-0.0249607	0.138099	0.0325493	-2.69101	-2.47855	0.0711099	-1.90917	0.118241	-1.27682	0.410342	0.917051	-0.370088	0.164646	0.246797	-0.159239	-2.658	-1.04991	-2.6529	-2.39823	-0.176932	0.379543	-0.217931	0.448624	-0.403381	0.579401	-0.792684	-0.253005	-1.89215	0.380185	-3.25403	0.561754
b0732	mngB alpha;-mannosidase	1.40857	0.424086	-1.25896	-1.79287	-1.45196	-0.850463	-2.66706	LQ	-3.1235	-3.28272	-0.739927	-0.355039	-1.82258	-0.0851713	-0.144321	-1.53001	-0.259321	0.2151	-2.62962	-5.67613	-2.41803	-0.717297	-1.40842	0.525319	-1.29011	-0.608763	-0.423598	-1.45854	-2.24117	-2.23487	-0.517001	0.726965	-0.622364	0.0899518	-1.55374	-1.17447	-2.48444	-2.31904	3.05366	-0.96933	-2.36315	-1.44511	-0.482038	-2.77333
b0733	cydA cytochrome bd-I terminal oxidase subunit I	-2.57229	0.463298	10.8369	12.9964	6.71558	5.95942	13.6979	12.147	1.67287	0.907231	-1.13944	2.11543	-1.21377	2.01977	1.26632	-1.71119	-0.328198	-0.491623	0.361401	-2.47613	-2.49439	0.0298006	0.826205	-0.820121	0.698658	0.536068	0.893502	-0.884714	0.581262	1.3408	-2.03917	-2.56928	-0.147722	-0.830968	-0.980243	-0.513295	-2.2272	0.95392	-1.00445	1.06234	-1.94028	-2.02866	-0.475501	-1.13006
b0734	cydB cytochrome bd-I terminal oxidase subunit II	-2.29122	1.01623	4.469	4.96397	1.81466	2.04432	6.67072	4.31595	-0.457973	3.02793	-0.303807	0.345738	-0.719554	0.381502	0.16157	-0.469984	-0.261092	-0.0677519	0.217378	-1.42479	-1.09163	-0.868568	0.222284	-0.941323	0.326407	-0.492379	-0.387843	-0.687502	0.162232	0.446389	-1.00811	-1.52205	-0.377618	-0.602051	-1.40058	-0.495884	-1.58123	0.522943	-1.03874	0.366262	-0.645298	-1.07746	-0.361998	-0.637803
b0735	ybgE putative lipoprotein	-0.523439	1.36796	-0.274937	0.519618	0.604792	-0.130494	0.215736	0.069174	0.325326	1.15266	0.194962	0.342675	-0.431942	0.339254	0.411346	0.26722	1.6174	1.58922	2.33629	-0.0645254	0.797623	0.0389335	0.934482	0.58952	-0.085509	0.241055	0.162489	-0.370361	-0.128777	0.350403	-1.19031	-0.794549	0.679045	-0.0984993	0.221329	0.55619	-0.369116	0.706087	-0.0308372	1.59228	-0.486249	-0.886465	0.624161	-0.73342
b0736	ybgC esterase/thioesterase	-0.877208	0.6598	-1.03342	1.02025	0.216458	-0.391626	0.55664	1.99447	-0.604944	0.0376507	1.80791	0.962171	-1.37784	-0.703636	-0.421842	0.625214	3.97143	4.11683	0.0349028	-0.833613	-1.21179	-0.900756	0.757872	-0.606025	0.515889	0.39472	0.117469	0.28074	0.0563809	1.47858	-1.331	-1.43958	0.152338	-0.688311	1.39304	0.179018	-1.52514	0.727308	-1.12565	0.449005	-0.633587	0.0997452	3.3229	-0.891511
b0737	tolQ The Colicin A Import System	-1.82922	0.848604	-0.55753	1.91018	LQ	-0.0445505	-0.0179089	1.52349	LQ	-0.467518	1.77284	0.30845	-0.834174	-0.284281	-0.729	0.651967	3.06902	3.05535	-0.0971053	-0.840269	-0.644487	-1.97533	0.64398	-0.0916376	0.24912	-0.030014	-0.339386	LQ	-0.233335	0.344506	-0.957882	-1.98895	LQ	-0.55153	LQ	-0.742673	-1.87209	0.304087	-2.01042	0.668888	-1.40247	1.23798	2.78923	-0.364492
b0738	tolR The Colicin A Import System	-1.70365	0.685605	0.331526	0.439233	-0.0099723	-0.381168	0.102498	-1.03278	-0.297538	0.232351	0.33786	0.902518	-0.429178	-0.0400495	-0.195625	0.687753	-0.0101572	LQ	0.400331	0.697612	-0.1043	-1.3175	1.27829	0.388509	1.59098	0.29845	-0.191968	-0.984057	1.12138	0.615295	-0.82931	LQ	0.212055	3.30567	-0.970887	-1.1054	-1.58647	1.55885	-1.58797	1.48456	-0.321347	-0.0813539	-0.17359	0.567983
b0739	tolA The Colicin A Import System	-1.87471	0.67936	0.942022	-1.72672	-0.175071	-3.10303	-0.63116	-1.48952	0.180092	-1.75781	-0.599868	0.659088	-0.871642	-0.336333	-2.13214	-0.0975572	-0.60455	-2.23864	0.0384695	-1.44857	-0.542677	-1.66294	0.86472	-0.5765	0.706996	-0.447229	-2.06892	-0.766014	0.799058	0.836999	-1.50408	-3.47681	-0.478205	0.592277	-1.00149	-1.38676	-1.58366	1.95769	-1.88611	0.291273	-1.14472	0.0560462	-0.420423	1.44439
b0740	tolB The Colicin A Import System	-2.42558	1.08017	-0.566231	0.263161	-0.37959	-0.224845	-0.558087	-1.75561	-0.668527	-0.046716	-0.333069	0.23821	-0.0648474	0.0289558	-0.523462	-0.546507	0.0730284	-0.582636	0.0726252	-0.891155	0.349555	-0.0333495	1.13338	-0.6679	0.347684	0.478323	0.559564	0.170621	0.331297	0.483707	-0.687386	-1.25874	-0.280475	1.36444	-1.40661	-0.428517	-1.30843	0.296791	-1.31021	0.271961	-1.12037	1.68178	0.0700993	-0.407477
b0741	pal The Colicin A Import System	-1.95814	0.978509	0.998995	2.7115	0.055012	1.18717	0.370914	-0.31319	-0.28151	1.44373	0.298141	0.734013	0.209968	0.290956	0.109384	0.0462709	0.0586519	-0.24029	0.282286	2.11792	-0.336531	0.123494	1.51642	0.917928	0.99044	2.01878	1.5978	0.565555	1.46024	0.774561	-0.159239	-1.09156	-0.140885	-0.17627	-0.67302	0.844399	-1.07462	0.750095	-0.900961	1.64585	-0.581148	0.635989	2.00393	0.293069
b0742	ybgF predicted periplasmic protein	-0.355827	0.760246	-2.47969	-0.534351	-0.452167	-1.08045	-0.134168	-1.74811	-1.71412	-1.39222	-1.18223	0.0439666	-2.74704	-1.27116	-1.49489	-2.07176	-1.34748	-1.45342	0.911133	0.848941	-2.04544	-1.7101	-0.784345	-1.54996	1.06111	0.502589	0.21398	-0.937347	-1.11323	-0.0607059	-2.65776	-2.62962	0.291267	0.0972221	-2.255	0.0653105	-2.49247	-0.916761	-2.33403	-0.879467	-0.990609	-1.03574	2.06806	-2.08866
b0750	nadA quinolinate synthase	-1.06469	0.89174	2.02674	0.246937	3.65584	3.45371	3.51508	3.81787	3.16283	2.47121	0.448018	-1.04122	-1.34308	-0.575753	-0.455221	0.477041	0.908607	0.658586	-0.892212	-0.587625	-1.54429	0.508784	-0.821427	0.398126	0.0296912	0.216571	0.309372	0.777925	0.452232	1.14838	0.5316	0.65997	-1.04121	-1.92317	-0.415125	-0.174877	-2.51705	-0.917291	-1.70436	-0.882696	-2.38217	-1.74867	-1.5508	0.0895794
b0751	pnuC PnuC NMN transporter	0.319066	0.542594	-0.800652	-0.184468	0.139417	0.312908	-1.0228	LQ	-0.621117	0.417007	-1.13024	-0.873134	-0.458647	-0.199028	LQ	-0.675192	-1.97402	-1.6933	0.269187	-0.361764	3.72938	-1.77187	0.0357627	-1.192	-0.696005	0.0683962	-0.0886147	-0.859848	-2.13226	-0.740217	-4.33934	LQ	-2.85838	-1.91335	1.17015	0.00134073	-2.78744	0.0271396	1.54219	-1.33021	-3.3597	-1.53817	-1.74295	-3.79762
b0752	zitB ZitB zinc CDF transporter	0.355654	0.653791	-0.275126	-1.69587	-0.853779	-0.907586	-2.74936	-1.07219	-1.19612	-1.18414	-0.835565	-3.4675	0.00730356	-0.377992	-0.309052	-0.02952	1.67139	1.75671	0.00814188	-1.05917	-0.46991	-3.02613	0.768609	-0.058116	-0.0560859	-0.470987	-0.652353	0.18704	1.38416	0.682021	-5.01015	-6.08616	-0.614737	-1.40392	0.10089	2.60427	-1.47557	0.0988463	0.73104	0.376733	2.72683	-0.116824	-1.3701	-1.88155
b0753	ybgS conserved protein	0.669992	0.702154	-2.10832	-0.0690596	-0.841588	-0.400978	-2.14672	-0.96217	-1.43375	-1.62774	-0.997794	-1.45856	-0.682079	-0.0477556	-0.172485	-0.717193	-0.768344	-1.157	-1.59463	-2.58738	-2.15488	-2.58574	-0.659073	-0.678734	-0.300232	-0.0643732	0.00790682	-0.837334	0.513575	-1.06715	-2.48234	-2.96886	-1.27248	-0.45364	-0.828424	-0.17671	-0.859469	0.24648	-1.90362	-0.617677	-1.38659	-0.8078	-1.24334	-2.83828
b0754	aroG 2-dehydro-3-deoxyphosphoheptonate aldolase	-0.0708031	0.623786	-0.448263	4.81796	2.71623	1.63545	1.93788	4.9294	0.349645	1.12645	0.299625	-1.33521	-0.509933	-0.635966	-0.75751	-2.52345	0.119866	0.00655771	-1.77697	-3.10297	1.16412	-0.416688	-0.390674	0.036755	0.054835	-0.00320069	0.0830398	-0.773589	-0.767952	-0.359234	-1.0276	-1.0306	0.801797	-0.746645	-0.574018	-1.65027	-3.39306	0.11931	-2.69492	-1.54275	0.0565734	-1.69928	-2.49929	-3.78573
b0755	gpmA phosphoglyceromutase 1 monomer	-0.968671	1.07113	5.95112	6.36232	4.86396	4.45953	7.56877	6.49158	4.24885	3.69079	-0.222919	-0.498675	-0.404444	0.00874504	0.0248682	0.294305	2.13577	1.942	0.487334	0.613592	0.745047	-0.408405	0.836324	-0.541009	1.40791	0.340676	0.211704	0.753715	-0.51571	1.10378	-1.78544	-1.67353	-0.106983	-0.808245	-1.78473	0.0481157	0.883896	1.30722	-1.38108	0.014098	2.13104	2.62927	-0.845812	-0.262993
b0756	galM aldose-1-epimerase	-0.680834	1.06937	0.851624	3.01496	2.05674	1.57154	2.06675	3.09071	0.688284	1.29153	0.823608	0.66404	0.490077	0.448432	0.372389	0.839785	-0.3293	-0.0331281	1.21194	-0.601366	-2.15251	-1.10877	0.369616	-0.0163645	0.0728489	0.223377	0.265812	0.0720096	0.107718	0.476075	-1.90716	-1.91954	-0.123559	-0.369298	-1.02412	0.0806817	-0.257837	-0.255782	0.452185	-0.586403	-1.57244	0.781503	-0.188165	-0.468228
b0757	galK galactokinase	-0.338575	0.931137	0.0418009	0.308584	0.0303728	-0.203755	-0.821308	-0.193494	-1.39903	-0.503061	0.417573	0.425768	0.306097	0.433445	0.267769	-0.492398	-2.26276	-1.5354	-1.00551	-2.84588	-6.93638e-06	1.01419	-0.207275	-0.972759	0.980338	-1.29468	-0.881159	-0.993604	-1.72461	0.0881104	-3.1621	-3.20038	0.0108877	-0.280536	-0.995227	-1.82729	1.21393	-0.808692	-0.832515	-0.577297	-3.02108	0.468513	-2.51962	0.162066
b0758	galT UDP-glucose-hexose-1-phosphate uridylyltransferase [multifunctional]	-0.318555	1.33404	0.324487	1.18231	0.668062	0.0757539	-0.204663	0.358017	-1.02626	-0.0339716	1.00475	2.29263	0.0548279	0.50952	0.295869	0.0693726	0.586533	0.397746	-1.69077	0.867247	-1.01207	-0.460067	0.711587	-0.383238	1.00172	0.603029	0.709288	0.13248	-0.157637	-1.11292	-2.71449	-2.87469	0.494764	1.38119	0.426784	-0.127928	-1.34178	0.492426	-0.40619	0.43509	-2.43455	-1.04678	-0.407168	-0.740083
b0759	galE UDP-glucose 4-epimerase monomer	-1.15593	0.93619	-0.162249	-0.57473	-0.0570967	0.340916	-1.10732	LQ	-0.897003	0.108181	1.4045	-0.00734643	-0.00538721	0.662217	0.649754	-0.32864	-0.787272	-0.805084	-1.38096	-2.06143	-1.45218	-2.28425	0.562499	-0.454204	-0.461507	-0.906903	-1.40215	-1.34863	-0.819289	-0.368589	-1.88838	-3.1449	-0.957125	1.30059	0.533671	-0.185984	0.0834198	1.83167	-0.348133	0.254398	-3.04118	-0.311751	-1.84638	-1.09502
b0760	modF ModF	-0.809926	0.947366	0.667077	-0.367526	-0.406811	-0.145128	-1.67892	-0.325434	-0.188028	-0.674496	0.021033	-0.164871	-0.289585	-0.233971	-0.256623	-0.171637	-0.400291	-0.356303	0.600374	0.229258	-1.45648	-0.980257	-0.0695883	0.11768	0.288183	-0.209938	-0.248001	-0.690628	-0.0893957	-0.0126662	-1.59177	-1.53249	-0.788786	-0.930726	-0.657975	-0.369568	-0.70991	0.221969	-0.603351	-0.491848	-1.53925	0.0177037	-0.580521	0.282298
b0761	modE ModE-MoO 4 2- transcriptional dual regulator	-0.751266	1.04111	0.997615	-1.47194	0.589633	0.917338	-1.75457	0.337819	-0.73259	0.621731	1.55404	3.01741	1.16891	0.947813	0.912719	0.37768	0.105671	-0.0663593	-1.05069	0.729861	-1.55981	-1.37189	0.69408	1.45785	1.10608	0.797946	0.786803	0.614245	1.57461	0.467807	-1.31216	-1.00775	0.949731	-0.0529904	1.06504	0.273073	2.29119	0.479497	-2.28169	2.01228	0.626445	1.45083	-1.80552	-1.1894
b0762	ybhT predicted protein	-0.0335532	0.370323	-0.0434584	1.09811	-0.290357	0.479129	-0.300113	1.92992	2.25322	0.155555	-0.253844	2.08664	-0.3103	0.229403	0.479544	-1.21295	0.100131	0.198881	2.21466	-1.09766	0.0149176	-0.920236	0.980627	-0.154669	0.79704	0.262249	-0.201431	0.12214	2.26223	1.66121	-0.59227	-1.00404	-0.0364819	-0.405602	-0.247034	-0.0574674	-1.2874	2.45221	-1.07591	1.14707	0.334252	0.190479	-0.667003	-0.331417
b0763	modA molybdate ABC transporter	-0.591667	0.82479	-1.87936	-1.38414	-0.18533	0.500728	-2.21945	0.283525	-0.0379263	-1.56949	0.816157	-0.548946	0.568008	-0.293079	-0.522097	0.734772	-0.16546	-0.466488	-0.00652502	-3.05144	0.154859	-1.00954	0.268504	1.20903	-1.21676	0.611718	0.346822	0.803882	-0.177933	0.327925	-3.37687	-3.57821	-0.61123	0.607951	-1.20731	0.943214	-3.24307	0.969219	-0.861988	-0.319993	0.340841	0.91089	-1.123	-1.06162
b0764	modB molybdate ABC transporter	-0.531901	0.788214	-2.05786	0.657882	-0.730945	0.686803	-3.06592	-0.651609	-1.04044	-1.58133	0.665344	-1.67844	0.0351068	0.516025	0.029588	-1.02243	1.32292	1.18406	0.658009	-2.90644	-2.21484	-0.862599	-0.781268	-1.01655	-1.66364	-1.49938	-1.37656	0.170674	-1.8332	-1.12291	-3.77741	-4.35327	-1.58891	2.35052	-0.516179	-1.6414	-3.77172	-1.00074	-3.01512	-1.15663	-1.43926	0.333567	-1.35101	1.53933
b0765	modC molybdate ABC transporter	-0.689187	1.00665	-0.162135	0.676211	1.34055	0.861637	-2.31012	0.596834	-0.734501	-0.0289926	1.02404	0.951802	0.0777062	1.04831	1.01286	0.492324	0.43463	0.32499	0.700817	-2.72056	0.523443	-1.51082	0.0698612	0.301631	1.43686	0.605846	0.624894	0.786714	0.293434	-0.574971	-2.34942	-2.48328	0.789322	1.81101	1.44432	0.0223283	-2.75528	0.841387	-0.302797	1.63571	1.28213	-0.518083	1.25069	-0.815931
b0766	ybhA pyridoxal phosphatase / fructose 1,6-bisphosphatase	0.382689	0.792053	LQ	0.857597	LQ	-0.0564933	LQ	0.0230655	LQ	-0.742109	LQ	1.38819	LQ	-0.212403	-0.094598	LQ	-1.0332	-0.954102	1.04398	-1.69797	LQ	-1.52594	0.475664	-0.665457	1.2348	0.953044	0.813851	LQ	-0.413372	-0.248651	-3.21525	-3.22409	LQ	0.577518	LQ	-0.3071	-0.483546	0.389886	-2.00739	0.322029	1.6876	LQ	0.343481	LQ
b0767	pgl 6-phosphogluconolactonase	-0.950843	0.542779	-1.54896	-0.621641	-0.495052	0.519917	-0.823985	0.0617099	-3.4724	-0.525942	-0.334905	0.314652	1.29474	1.63487	2.22932	0.374289	0.192936	0.673397	3.16447	-1.01381	1.4622	1.28574	1.95695	1.60251	0.569258	0.0678841	0.940779	4.32259	2.37291	1.7746	2.92502	3.63498	-1.41337	0.429616	0.761451	0.761275	0.805802	0.66546	-1.96621	0.316172	3.91383	-1.65556	-0.263802	-0.141936
b0768	ybhD predicted DNA-binding transcriptional regulator	1.99491	1.06081	-0.21644	-1.23486	-0.655735	LQ	-0.0793097	-1.31991	-1.52802	-2.32916	-0.332642	-0.830437	0.104308	-0.131623	-0.651747	-0.299657	0.443534	0.526606	0.25106	0.245811	0.140916	0.249853	-0.753862	-0.402991	-1.48915	0.183898	0.238457	0.844444	0.66159	0.242505	-1.25404	LQ	0.128355	-0.0880707	0.229439	-0.314062	0.590214	-0.424519	-0.437927	-0.390791	2.21547	-0.99987	0.00773605	-0.282031
b0769	ybhH conserved protein	2.04082	0.41958	1.04951	-1.44361	-2.54759	0.0443805	2.1338	0.318029	-4.84436	-7.7001	0.313481	-1.46897	0.279021	0.186034	0.292501	0.492319	-2.60035	-2.38329	-0.517646	-3.08128	-0.630643	-1.76216	0.0914867	-0.0628252	-0.300987	-0.418651	0.389003	-0.999279	-1.21794	-0.00383096	-2.18663	-0.787619	-0.517401	-2.2051	-1.29918	0.238163	2.1217	0.939475	-1.77638	0.152243	-3.20741	1.12302	-0.878257	-0.895368
b0770	ybhI YbhI DASS Transporter	1.73036	0.317727	0.738192	-1.31112	-1.42304	0.640861	-5.41841	1.07038	-5.80518	-3.68407	-0.0876151	-1.27867	0.050475	0.611101	1.37638	-0.376278	-1.69074	-1.28955	-0.453914	-0.14397	-0.596733	-1.27279	0.860824	0.21522	-0.310905	0.426397	1.18715	-0.594246	1.44723	0.64784	0.29274	1.04889	-1.67304	0.114482	-1.93571	-0.0204289	0.219542	-0.692925	-1.94707	0.65072	-4.08715	0.715972	-1.50151	-0.959829
b0771	ybhJ predicted hydratase	0.370729	0.476125	1.386	-0.0175047	0.41819	LQ	0.314988	LQ	-0.914901	0.0576374	0.641228	1.08446	0.299094	-0.216482	0.0787981	0.0399004	0.136196	-0.0582774	0.144906	-2.07489	-0.586229	-0.418009	0.560453	0.9377	0.500976	-0.401589	0.295936	0.150073	1.30167	0.646163	0.298817	1.16922	0.435949	0.843897	1.22205	0.155939	-2.19615	0.960513	-1.33401	0.512858	-0.428694	1.02364	-1.15757	0.939211
b0772	ybhC esterase/thioesterase	-0.244788	0.784356	0.840547	-2.26038	0.389653	-0.537351	-2.25402	0.815088	-0.301598	-0.986621	0.0884125	-0.074567	0.566812	1.07484	0.73759	0.299164	-0.219465	0.0768268	0.124865	-3.95063	-2.93415	-0.458691	1.20272	-0.632886	-0.765235	-0.695837	-0.883968	0.206987	-0.920612	0.436607	-0.985071	-1.04696	-1.56348	-2.08291	1.12638	0.991439	-1.36852	0.499494	-2.72904	-0.0875512	-3.22958	0.645538	-2.08245	0.888092
b0773	ybhB predicted kinase inhibitor	-0.184743	0.532618	-1.51793	-0.741761	-0.564814	-0.33274	0.261552	0.99264	1.17754	-0.363559	-0.254351	2.21532	0.0547822	0.247893	0.153708	-1.04077	2.75409	2.45764	-0.444821	-2.59977	-0.563356	2.07287	0.501325	-1.54465	1.46151	-0.555197	-0.191912	0.155733	-0.83591	1.22579	-1.45565	-1.12622	-1.16985	-0.292326	-0.288491	1.02258	0.0341578	1.29486	-0.198845	0.532687	2.59954	-0.367179	-1.81162	0.973285
b0774	bioA adenosylmethionine-8-amino-7-oxononanoate aminotransferase monomer	-1.57596	1.14275	-0.619389	-1.23382	-0.587081	0.0178318	-1.07973	0.0803614	-1.04196	-0.607014	-0.527059	0.542412	0.252353	0.263514	0.277092	0.17074	-0.586796	-0.271155	1.36629	-0.0490061	1.45586	0.388078	1.37835	-1.09717	1.02239	0.10632	0.311114	0.770083	0.508759	1.19644	1.88426	2.21733	-0.938483	1.17423	-0.639342	-0.93861	-0.926894	0.164967	-0.266847	0.585755	1.72851	0.135539	-0.627504	2.3527
b0775	bioB biotin synthase monomer	-2.13466	0.766679	-0.307251	-0.886767	-0.507761	0.14736	-1.31708	-0.773818	-1.56876	0.283747	-0.498785	0.575191	-0.58323	0.439551	0.420727	0.434593	0.114232	0.217356	2.02101	4.79929	1.82184	1.62576	2.60254	1.6285	0.731795	0.801534	1.28573	1.03826	1.80309	3.32805	-0.378078	0.266998	-1.48591	0.951759	-1.40636	0.192638	-1.29249	0.466975	-1.31521	0.488717	1.02183	1.12286	-0.336937	3.61961
b0776	bioF 8-amino-7-oxononanoate synthase monomer	-0.634199	0.631814	-3.35833	-2.8952	-1.57963	-2.08066	-0.346719	-2.85298	-4.20724	0.0584277	-1.22955	-0.157177	-1.10985	-0.0117741	-0.176411	0.520624	-1.08344	-1.6633	2.73912	0.069612	2.54975	1.11823	0.972031	-0.0455519	0.158805	0.147999	0.402454	3.31412	3.16017	2.43568	1.42665	1.928	-1.37544	0.0130151	1.08675	-1.32445	0.188546	-0.582596	-1.75821	1.21028	0.941792	0.493218	-2.32143	4.67658
b0777	bioC predicted methyltransferase, enzyme of biotin synthesis	-0.662877	0.98545	-1.44308	-1.2664	-0.80676	-0.539731	-0.818527	-1.0341	-1.47521	-0.0641184	0.0981604	-1.1387	-0.240036	-0.898018	-0.994869	-0.346621	-2.69164	-2.11423	0.223658	1.84843	1.10176	-0.205927	0.244493	0.185318	0.324144	-0.481864	-0.332901	2.02201	1.89895	0.600062	1.61509	1.67482	-0.0596549	1.04465	0.729311	-0.321452	-2.68678	-0.829047	-2.8241	0.611485	2.76693	-0.85057	-1.29089	2.51264
b0778	bioD dethiobiotin synthetase monomer	-0.968887	1.02205	-0.796816	-0.925667	-0.461768	0.53753	-0.557015	-1.12106	-2.0615	-0.96939	-1.00631	-0.56105	-0.0411653	0.58061	0.300058	0.56997	-1.41804	-1.03312	-0.594882	0.423238	2.00864	0.227824	0.244006	0.158837	0.512824	-0.179807	-0.0664103	1.53719	0.674333	2.18017	-0.0391383	-0.20981	-0.945112	-0.0797044	-2.17972	-0.0229839	-1.69847	-0.179795	-1.87295	-0.55773	0.298392	1.1268	-0.564709	1.45415
b0779	uvrB DNA repair; excision nuclease subunit B	-0.488701	0.461522	0.328231	-1.04456	-0.421873	0.859647	-1.55303	-1.0701	-0.81446	-0.197868	0.91769	-0.967853	1.60954	0.19317	0.0370845	0.460221	-3.5444	-3.33799	-0.178161	0.136813	-0.738163	-1.56047	1.07635	1.18348	-0.851339	-0.23794	-0.0164406	-0.911154	0.525807	2.33288	-1.73292	-2.1942	-0.54819	-4.39578	-1.68114	1.68211	-0.401389	-0.600074	-3.68784	-1.85714	3.60084	1.45773	-1.69946	-3.4654
b0780	ybhK predicted transferase with NAD(P)-binding Rossmann-fold domain	0.472526	0.535481	-1.10902	-0.457937	-0.36578	-3.12057	-4.52756	-0.0650154	-3.20224	-2.9692	-0.92497	0.549489	-3.46978	-1.50487	-1.44707	-2.37118	-3.31286	-2.71412	2.76969	-3.68315	-5.14062	-2.75835	-1.63528	-1.2734	-0.30033	-0.319496	0.250816	-0.860223	1.76387	-0.340555	2.01372	2.2836	-0.210012	-3.0785	-0.0479502	-2.1959	-5.77837	-1.75	0.705672	-0.236288	1.75102	-4.43993	-0.971911	-3.93145
b0781	moaA molybdopterin biosynthesis, protein A	-0.56616	0.806532	1.40463	0.701928	0.0658976	0.861994	-2.74867	0.180314	-1.91717	0.665207	0.882633	-0.58019	0.854036	1.29477	1.10418	0.560388	0.833808	0.949444	2.16718	-2.70377	-2.07702	0.584415	0.721534	-0.553929	0.701698	0.00230678	0.00176055	0.943566	-0.240478	0.568406	-1.59629	-1.01468	-0.969307	-0.320348	0.67115	0.88837	-1.94605	0.793107	-1.3074	-0.0191333	-1.58095	-0.238448	-1.24651	-0.606416
b0782	moaB MoaB subunit	-0.748544	0.934585	-0.0276834	-0.686824	0.587642	0.15446	-0.726576	-0.329722	-0.880695	0.923451	0.103081	1.25456	0.52066	1.25094	1.07841	0.248123	0.235557	0.155432	-0.183362	2.17005	-0.645901	-0.0805473	0.647692	0.930894	0.879033	0.831976	1.409	-0.332152	0.243858	0.967237	0.774135	0.57772	0.366726	-1.21547	-0.867894	0.968596	-0.875626	0.479088	-0.255694	-1.02597	-1.7135	-0.064748	-1.1498	1.92399
b0783	moaC molybdopterin biosynthesis, protein C	-0.754453	0.462728	3.98833	0.351797	0.678757	-0.621864	3.46446	1.79683	0.105781	1.631	0.576468	-0.302888	0.38507	0.787454	0.909666	-1.92575	-2.84559	-1.79468	4.40128	-3.3023	1.49657	-1.67538	1.26668	-0.428682	0.233012	-0.841762	-0.225601	-1.61369	-0.954761	0.912494	-2.05294	-0.600635	-1.16495	0.102311	-0.872222	-0.171604	2.57206	0.225042	2.56238	0.861559	-3.5734	-1.36656	-1.99879	-1.18216
b0784	moaD molybdopterin synthase small subunit	-1.02321	0.359391	-0.0368116	0.137841	0.743807	1.36619	0.399738	-1.08106	-0.689058	LQ	0.321609	2.10007	-0.0793352	0.361988	1.59285	-1.26638	-1.10197	0.101508	1.48748	-1.0949	-1.55899	-0.505383	1.70474	LQ	1.51551	-0.71326	LQ	-0.870957	2.2	1.98343	-0.551526	LQ	2.64591	2.64536	-2.19393	0.0770384	-0.873873	2.96648	-0.137051	1.39552	-1.16617	-0.851458	-0.103247	-0.509217
b0785	moaE molybdopterin synthase large subunit	-0.994839	0.846994	2.41314	1.07292	-0.243299	1.18568	-1.15219	0.161634	-1.35012	-0.715982	0.760139	-0.25094	0.60545	0.243435	0.629643	1.11628	-0.53333	-0.210101	-0.101869	-0.531667	-0.904017	-0.910896	0.730547	-0.66406	0.351613	-0.421114	0.33186	0.0512242	1.26977	0.968889	0.878132	1.70151	-0.80712	-0.243367	-1.30727	0.859188	-0.893768	1.55901	1.34852	-0.503881	-1.59765	-0.119599	-0.652845	-0.555616
b0786	ybhL putative transport protein	2.05662	0.497967	0.167856	-3.58939	-1.97356	-1.11501	-5.14492	-2.32157	-6.48708	-7.95827	-1.26175	-0.886783	-1.1899	-0.555727	-0.531431	-2.0227	-2.07178	-2.27407	-6.73713	-6.38011	-7.27162	0.593783	-0.255543	0.485992	0.289236	-1.6362	-1.0345	-0.154704	-0.14691	-0.946998	-1.13471	-0.0866893	-0.148906	-0.0313123	0.918577	0.0866822	-1.11898	-3.99074	1.32946	-1.68737	-7.45159	-0.288109	-3.108	-0.230566
b0787	ybhM conserved inner membrane protein	2.22442	0.399169	-2.76842	-1.06891	-2.52522	-3.92123	-3.00148	-1.42545	-1.98173	-8.71662	-2.23344	-2.15634	-0.957607	-2.29234	-2.54051	-1.35561	-2.81363	-2.82995	-1.85337	1.32503	-0.391062	1.06188	-2.56369	-1.367	-1.78497	-1.41924	-0.232774	-0.731634	-1.19293	-0.740003	-1.69442	0.552033	-0.80303	-3.03461	-0.308586	-1.62806	-4.75062	-2.42298	1.72245	-1.45609	-3.91293	-2.14826	-1.43353	-2.73807
b0788	ybhN conserved inner membrane protein; predicted DNA-binding transcriptional regulator	0.967436	0.910877	-1.41602	-0.784928	-0.603552	-1.3972	-0.134486	0.863014	-3.04819	-2.40512	-0.35736	-1.19241	-0.780669	-0.166598	-0.121317	-0.658826	-0.162319	-0.0720456	-0.882137	0.592001	-2.2875	-0.679174	-0.233344	0.929711	-0.229042	-0.553864	-0.238644	0.234385	-0.675438	-0.0171988	2.01747	2.30076	-0.657809	0.59299	-0.86013	-0.764663	-0.0546557	0.23491	0.134603	0.188874	-3.33678	-1.74829	-1.3303	0.348965
b0789	ybhO cardiolipin synthase 2	-0.706555	0.61406	1.67648	0.111194	-0.0108259	0.00414659	1.91684	0.376392	-2.25369	1.17568	0.256746	-0.852069	-0.0892155	-0.551135	-0.266612	-0.631597	-3.12343	-2.17883	-1.50418	-3.72503	-0.206021	0.366958	0.550005	1.08463	0.108142	0.714114	1.50063	-0.817086	-0.122523	1.39348	-3.54367	-2.78125	-0.402489	-2.83883	0.0476904	0.11012	-3.0203	-0.552088	-2.90036	-0.15481	-2.79228	-0.0981052	-0.410825	-0.483698
b0790	ybhP predicted DNase	-0.48943	0.929077	-0.0102666	-0.385725	-0.401923	0.283409	-0.156403	-0.46986	-1.5673	1.40635	0.605312	0.12248	0.0115048	-0.512926	-0.155978	-0.696825	-0.698337	-0.334328	-0.103932	-2.23367	-0.176807	-0.0132339	0.352456	0.607413	-0.181902	-0.0235444	0.350428	-0.464527	-0.134812	1.53985	-2.54032	-1.58742	-0.89191	0.169888	-1.32026	-0.943574	-1.55594	0.375637	0.210877	-0.786939	0.456109	0.255288	-0.53615	-0.41251
b0791	ybhQ predicted inner membrane protein	0.00887954	0.923255	-1.24967	-1.19131	-0.194533	-0.499377	-1.79832	-1.0894	-1.35008	0.354628	-0.212808	-0.552137	-0.206038	1.13977	0.744773	-0.54006	-1.71915	-1.39594	-1.19221	-2.14499	0.542037	-1.4539	-0.272616	-0.511091	1.41071	-0.316639	-0.0706057	-1.20567	-0.911978	-0.148819	-2.6722	-2.33774	0.671369	0.0383937	1.36441	-0.00558875	-1.98289	-0.328797	-0.241671	0.739441	-1.7533	-0.204565	-1.44049	-1.01829
b0792	ybhR YbhF/YbhR/YbhS ABC transporter	0.226629	0.951562	-2.3732	-1.33576	-1.23726	-0.440194	-2.22915	-0.712614	-2.7078	-0.22442	-0.257985	-1.65919	-1.26537	0.199435	0.156584	-0.429938	-1.29535	-1.26714	0.0296383	0.354317	0.438579	-1.06437	-0.128695	-0.656508	0.0705433	-0.836171	-0.444276	-0.356301	-0.892467	0.502068	-2.26789	-2.35087	-0.382529	-0.40841	-0.407998	-0.390593	-2.23503	-0.376369	-0.0397747	-0.536788	-2.35306	0.978821	-1.21583	-2.0595
b0793	ybhS YbhF/YbhR/YbhS ABC transporter	0.105752	0.813143	0.274127	-1.31978	-1.17315	-1.09248	-3.56023	-0.875649	-3.29913	-1.58382	-0.0519109	-0.281129	-0.533191	-0.5272	-0.505435	0.0618488	-2.31144	-2.07849	1.77937	0.0614874	-3.38924	-0.273407	0.5003	1.31341	0.201974	-0.147372	0.352345	0.144475	-0.653952	0.602926	-2.41169	-2.07327	-0.246545	0.364974	-0.139127	-0.675738	-0.500008	-0.905497	0.697254	-0.322228	-2.06438	1.01355	-0.674388	-0.922652
b0794	ybhF YbhF/YbhR/YbhS ABC transporter	-0.527989	0.794753	0.880146	-1.6855	-0.0791788	0.340452	-1.40463	-1.79147	-1.97588	0.757182	0.596573	0.82563	0.618545	0.823607	0.9898	0.734817	-1.14506	-0.991847	0.797041	-0.692087	-0.0320709	-0.936877	1.15009	-0.662117	-0.155164	-0.409516	-0.338981	0.413596	-0.132769	0.668715	-2.36275	-2.31948	-0.253122	-1.13981	-0.403597	0.0949547	-1.85868	0.749161	-0.639881	-0.353539	0.830262	0.615159	-0.491399	-1.07824
b0795	ybhG predicted membrane fusion protein	-1.03173	0.702564	2.05622	0.629929	0.612129	0.660336	-1.78426	0.237551	-2.42738	1.80507	2.06171	-0.466908	1.92422	1.68426	1.48615	2.36288	1.49751	1.8659	0.327406	-3.07518	-1.72458	0.140741	1.88777	-0.548868	2.3011	0.940669	0.792029	0.784746	-0.218813	1.84929	-0.237356	-0.465116	0.164519	-0.0316439	2.06926	2.0706	0.989776	1.27186	-2.78074	0.0674387	-2.39627	-0.614297	1.27503	2.47528
b0796	ybiH predicted DNA-binding transcriptional regulator	-0.778334	0.744042	0.0554583	0.742268	0.805749	0.933658	1.01812	-0.671306	0.124286	0.359034	0.916784	2.65684	0.843701	1.03938	1.00304	1.79811	1.39243	1.85509	0.0924929	-2.07743	0.116912	-1.34451	1.18502	1.14404	1.12699	0.380772	0.378187	0.657315	0.0797748	1.01059	2.75331	2.97232	0.347122	0.263001	2.76156	0.315423	-1.51832	0.465129	-2.1367	1.22186	-2.15974	-0.847403	1.59889	0.420991
b0797	rhlE DEAD-box-containing ATP-dependent RNA helicase family member	-0.566549	0.530047	-1.88832	-0.307671	0.289109	0.193091	-3.4994	-1.63991	-0.40753	1.24239	0.593913	-0.0273484	-0.722823	0.423691	0.394273	-0.767443	1.39822	1.75884	-1.86304	-4.46915	0.954894	-2.90563	-0.00577978	-0.847311	1.83254	0.9469	0.837975	-1.68111	-1.03378	-0.612678	-2.55506	-3.1981	0.391599	0.0591478	0.356475	-1.99233	1.81706	1.16787	-1.16543	0.776573	-4.65222	0.511868	-2.67403	-1.80453
b0798	ybiA conserved protein	0.408441	0.60267	-2.80824	0.203842	-1.09146	-1.8937	2.81412	0.312793	-1.51099	1.24	-0.327162	-0.410897	-0.203691	-2.51994	-2.24833	-0.722534	2.1616	2.28264	-1.98212	-2.9406	1.04311	0.697289	-1.08943	-1.34379	-0.581628	-0.124845	-0.158615	-0.977017	-1.48063	-1.68365	-3.66354	-3.7428	1.1944	-0.933447	0.285261	-2.40854	1.6404	-0.998194	0.0852147	0.487457	-3.67666	-2.47573	0.693656	-2.27221
b0799	dinG ATP-dependent helicase	-0.721596	0.505074	-1.00392	0.38776	0.836807	-0.261505	-4.00206	-0.278514	-0.790165	0.692829	0.270177	-0.531703	-0.238554	0.0411327	-0.596932	-1.2854	-0.562511	-0.27675	-0.818702	1.10859	2.59627	1.37941	0.642243	-0.364615	1.128	-0.316986	-0.494608	-1.7401	-0.104075	-0.11837	-3.0913	-3.22332	-0.00329717	1.4239	0.497082	-0.562521	-0.519936	0.419746	-1.42488	0.563662	-2.37351	0.236708	-1.83523	-3.47248
b0800	ybiB predicted transferase/phosphorylase	-0.835964	0.780605	-0.107491	-0.320277	-0.686799	0.0343292	0.0446162	-0.49122	-0.637555	1.45445	1.10904	2.2097	0.076839	0.177204	-0.0127682	0.225269	0.93184	0.709702	-0.410049	1.71659	-1.26089	-1.49452	0.51058	0.215061	-0.241483	-0.114054	0.163618	-0.419691	-0.728311	0.477729	-1.45631	-0.856339	0.209083	-0.0457648	-1.55195	0.668519	1.22339	0.379258	-2.21484	0.479262	-0.453238	-0.942845	-1.68838	-1.84348
b0801	ybiC predicted dehydrogenase	-0.861106	1.60014	-0.267819	-0.373328	0.480707	0.254033	-0.970305	1.2934	-0.393882	0.595817	0.601471	0.984237	0.261136	0.34264	0.462948	0.426876	-0.398741	-0.20819	-0.319495	0.574518	0.973289	-1.41664	0.565928	0.721529	1.01006	0.95244	1.09505	0.108758	-0.212687	-0.462821	1.03952	1.19786	0.207244	0.219718	0.440035	-0.150866	0.255622	0.513987	-0.689372	-0.0329875	1.22176	0.745175	-0.182892	-0.104549
b0802	ybiJ predicted protein	-0.500149	0.653454	0.758791	0.287399	-0.119904	0.361869	0.826286	1.08534	-0.216351	0.389794	0.00673409	0.382715	0.444358	-0.029875	0.543889	0.658238	-0.484282	0.114542	0.33444	1.44629	-0.677085	-0.595643	0.222796	-0.278764	-0.009425	-0.300033	0.131554	-0.569942	0.36378	0.283719	-1.5286	-0.941107	-0.112758	-0.42512	-0.719985	-0.640245	-0.827244	0.598778	-1.03661	-0.0380191	-1.12926	0.149772	-0.654376	-0.0721919
b0803	ybiI conserved protein	-0.653952	0.721187	-0.122869	0.270042	-0.167174	0.360562	-0.536236	0.161158	0.406764	0.222118	-0.176281	0.389066	0.371003	-0.127469	0.336017	-0.218414	-0.927158	-0.258318	-0.382149	-1.10041	-0.120204	-0.663932	0.4456	-0.74007	-0.0293644	-0.0747177	0.399289	0.0699977	0.333156	1.98845	-1.73046	-1.23154	-0.434198	0.701772	-0.647075	0.358218	0.210122	0.975283	-0.148767	-0.026758	-1.19697	-0.0372805	-0.39476	-0.364911
b0804	ybiX conserved protein	-0.819549	0.69109	1.03588	1.77807	1.47227	0.57914	-2.0298	0.839535	0.145718	0.54274	0.226827	-0.933138	-0.167756	-0.132584	-0.220546	-0.520144	-2.3934	-2.00307	-1.21058	-2.06387	0.766589	-2.25313	0.101312	-0.519196	-0.431499	-0.241239	0.215723	0.161065	0.834418	2.17603	-2.80683	LQ	0.545255	-0.0296875	-0.194483	-1.1084	-1.96238	2.4924	-2.1596	-0.271568	-3.23225	1.52815	-1.47372	1.06995
b0805	fiu putative outer membrane receptor for iron transport	0.0368342	0.723045	-0.535554	-1.29635	-0.985884	0.655162	-1.47615	-0.796435	-1.04363	-1.03358	-1.11167	-1.40806	-1.65879	-0.656994	-0.865161	0.547171	-1.43242	-1.56978	-0.246914	-2.59288	-1.01672	-0.209825	0.120644	-1.96259	-0.250574	0.147142	0.123204	-0.759565	-1.26153	-0.803866	-2.83881	-2.46261	-1.21862	-0.522462	-0.706801	-1.43872	-1.96431	0.969968	-2.79728	-0.280835	-2.65553	0.447024	-1.95936	-0.799979
b0806	ybiM predicted protein	-0.119542	0.928052	-1.41639	-0.54354	-0.942052	-0.721723	-1.63169	-0.97536	-0.111113	-1.07467	-0.411885	-0.355908	-1.06815	-0.247551	-0.116372	-0.992039	-1.36714	-0.771286	-0.450778	0.83296	0.906403	-0.99186	-0.348303	-0.145748	-0.785543	-0.277682	-0.232474	-0.300436	-0.646804	0.193038	-2.23974	-1.61581	-0.871999	-1.09696	-1.78545	-0.44163	-0.450197	-0.0706589	-1.11392	-0.182177	-1.38889	-0.135743	-0.715335	0.753135
b0807	ybiN predicted SAM-dependent methyltransferase	-0.462662	1.02277	0.402875	-0.676398	0.0291119	0.165734	-1.20738	0.00992189	-0.548707	-0.769585	0.640331	1.20693	-0.365664	0.334305	0.0550784	0.509547	-0.278467	-0.419601	-0.23871	0.146836	-1.18781	0.374011	0.0786242	0.858133	0.888501	0.453477	0.336516	0.366704	-0.645041	0.834872	0.599444	0.774082	0.25883	0.453385	0.0527324	0.256234	1.63678	0.865232	0.145899	-0.250338	0.409799	1.31132	-0.892818	-0.00554795
b0808	ybiO predicted mechanosensitive channel	-0.0463398	0.474197	-0.264111	-0.793644	LQ	0.252621	-0.805447	0.939703	LQ	-0.124782	0.758501	-2.43149	-0.049741	-0.545022	-0.662873	-1.46208	-1.06207	-1.4272	-0.882822	-2.83687	-0.264031	-0.424021	0.475759	0.527337	-0.0162063	-0.51877	-0.597165	-0.0795148	1.87512	0.909104	-0.739762	-0.27651	-0.923735	-2.7462	-2.67216	0.195221	-0.194692	0.874854	0.357954	1.88968	-4.149	0.590885	-0.951136	-0.515709
b0809	glnQ glutamine ABC transporter	-1.30136	1.00506	-0.430458	-0.193768	0.100289	0.606094	-1.34531	-0.512255	1.26681	0.0254441	0.433756	2.05398	0.273765	0.685824	0.421442	1.01275	-0.0192144	-0.00647679	0.164922	-1.18835	-1.05194	0.509617	0.0204596	-0.490857	-0.491842	0.336408	0.479358	-0.528428	0.706671	-0.116978	-0.214365	-0.0223214	-0.0366054	0.123539	-1.56166	0.268844	-0.896497	0.546129	-0.899584	0.736707	1.57729	-0.317669	-1.00632	0.442832
b0810	glnP glutamine ABC transporter	-0.847006	1.27567	-0.285097	-0.313785	-0.173492	0.151122	-1.03723	0.153148	-0.940633	-0.422438	-0.183346	-0.854652	0.0386322	0.398541	0.363994	-0.487314	-0.663328	-0.254791	1.1358	-0.201546	-1.36196	-1.31783	0.325641	-1.48993	-0.907083	-0.0819181	0.148947	0.0418953	0.584865	-0.655118	1.01565	1.11937	0.167493	-1.03584	-0.665213	0.0130247	-1.99181	LQ	-0.966815	-0.0783787	-1.24756	-0.0478466	-0.183951	-0.688054
b0811	glnH glutamine ABC transporter	-0.193918	0.865759	0.509035	0.667109	0.48228	-0.485308	-2.50724	0.397366	0.483623	-0.423592	-0.13863	1.447	0.818141	0.0304952	-0.0475233	0.144661	-1.32109	-1.23809	-0.235661	-0.0362648	0.63718	0.904729	-0.00973058	0.891022	0.0931269	1.59681	1.20601	0.625666	-0.741792	0.399759	-2.84741	-2.24621	0.729411	0.621801	0.783278	0.333074	-2.25512	0.0895267	-0.0464619	-0.429445	-1.55776	-1.80992	0.108207	1.21909
b0812	dps stationary phase nucleoid protein that sequesters iron and protects DNA from damage	0.665435	0.434153	0.681136	-2.46837	-0.989843	-1.63366	-2.36863	-1.673	-1.52523	-2.53758	0.326107	-0.327933	-1.39631	-0.717223	-0.516208	1.24736	0.00136979	-0.140059	-3.09492	-2.41669	-0.235593	0.166464	-0.280721	0.333884	0.080542	-0.200083	-0.270363	-0.38918	-0.699544	0.102716	0.597335	0.801789	1.11599	0.852532	2.31484	-1.06451	-4.47055	0.474366	0.811829	1.18222	-1.39766	-5.18613	0.0334182	-1.08465
b0813	rhtA threonine and homoserine exporter	-0.0910974	0.517909	0.562865	-0.17532	-0.595026	0.393408	-1.36112	LQ	0.711523	-0.333659	0.0813962	0.460521	-0.445087	0.193039	0.476643	0.576919	-0.849554	-0.518298	-0.392893	-0.374862	1.62949	-0.704386	0.876927	-0.703106	0.937372	-0.11858	-0.166409	0.284327	0.793304	0.85281	-1.46613	-1.17446	-0.403414	0.564568	-0.179169	0.438195	1.24475	1.46627	-0.908453	1.44199	1.86968	0.551141	-0.312455	-1.04868
b0814	ompX outer membrane protein X	-0.610603	1.16818	-0.503076	0.195272	0.0478249	0.138125	-0.551854	0.29735	-0.244766	-0.307451	-0.295727	-0.337258	-0.215448	-0.251056	-0.32071	-0.378961	0.629497	0.594106	-0.602062	-1.20891	1.6666	-0.864137	0.130682	0.0527105	-0.363144	0.266278	0.210452	0.349621	-0.278262	0.464053	2.46875	2.65038	0.0980431	0.395957	-0.903544	0.792714	-1.29123	-0.0528194	-0.467985	0.511338	-1.15991	-0.0827265	1.20149	-0.468405
b0815	ybiP predicted hydrolase, inner membrane	0.193842	1.16272	-0.675159	-0.233264	0.142947	-1.24359	-1.50499	LQ	0.0964523	LQ	-0.341918	-0.741138	0.0507479	-0.155148	-0.218628	-0.206855	-1.30897	-1.00685	-1.28416	-0.83579	-0.637143	0.349097	-0.53485	-0.19239	0.528092	0.498748	LQ	0.0200872	-1.69682	-1.28091	-2.1981	LQ	0.821267	-0.131085	0.150037	-0.402719	-3.41205	-1.15623	0.263085	0.0647007	-1.64941	0.0844784	-1.30517	-0.781279
b0816	yliL predicted protein	0.257813	0.937037	-1.13213	-0.312708	0.115418	-0.720167	-1.09779	-0.69239	-0.10509	-0.784291	-0.652807	0.521662	-0.717278	-0.425633	-0.470201	-0.732427	2.03165	1.57881	-0.475248	1.33377	-0.759988	1.52768	-0.240418	0.45895	0.144826	0.149631	0.21158	0.264464	-0.231121	-0.29645	-0.241543	-0.0817156	1.03189	1.72945	-0.38761	0.256754	-1.51353	0.190772	1.83585	0.29782	1.75565	-0.922998	0.236425	-0.109338
b0817	mntR MntR transcriptional repressor	-0.0652265	0.517726	1.91058	-0.531339	0.514195	-0.651591	-0.370518	0.322567	-2.97487	-0.698061	0.553985	2.37443	0.0046214	-1.01404	-0.511339	-1.62489	0.195183	-0.07344	1.63746	-0.0117077	-2.65238	-1.16984	0.311752	0.982948	0.866207	1.32643	1.6874	-1.01966	1.72187	-0.675902	-2.30239	-1.78742	1.18006	0.796743	0.64607	-0.698384	-1.66675	0.255847	1.40965	0.236902	-1.82674	1.16885	-1.17263	-2.91094
b0818	ybiR predicted transporter	0.0990672	0.977383	-0.994652	-0.825368	-1.17275	-0.6173	-1.26773	-1.33715	-1.65696	0.384984	-0.886815	-0.563473	-0.799915	-0.673119	-0.921035	-0.453089	-1.63504	-1.57288	-0.933332	0.810192	-2.56721	-2.10443	-0.487773	-0.467554	-0.260298	-0.22886	0.0149545	-1.23976	-0.754303	-0.444571	-1.28349	-1.15303	-1.39582	-0.0233143	-0.159058	-1.10869	0.935068	-0.323026	0.529973	-1.36516	-2.56112	-1.3501	-2.40006	-1.82717
b0819	ybiS conserved protein	1.05263	0.746049	-1.10904	-2.1364	-0.563071	0.259396	-3.29813	-1.43773	-1.01154	0.0650657	-1.22777	-0.381821	0.0138083	0.486128	0.158468	-1.05682	-2.76015	-2.52379	-2.23958	-3.6685	-1.05573	-0.124479	0.195182	0.147458	-0.217147	-0.76613	-0.62732	-1.79325	-2.40027	-1.64758	1.15479	0.935133	-0.508767	-0.9106	-0.284535	0.168125	-1.13517	-1.75502	1.28835	-1.0557	-3.82678	0.32591	-3.25306	-2.43447
b0820	ybiT putative ATP-binding component of a transport system	-0.506655	0.800768	0.04251	0.789392	LQ	0.437094	0.234014	0.205381	LQ	1.31216	0.559852	0.675361	0.626264	0.702125	0.260313	-0.298678	0.339099	0.424177	-0.657725	-0.651147	-0.409969	0.678145	0.661618	0.798548	0.575652	-0.125806	-0.282205	0.0480136	-1.0022	-0.175226	0.870315	0.497809	LQ	0.258187	LQ	-0.75706	-2.01865	0.490606	0.523444	0.254063	-2.82669	0.401992	-1.3019	0.0904822
b0821	ybiU predicted protein	-0.876709	0.891068	0.173824	0.188788	0.404994	0.344513	0.906064	0.524297	-0.856138	0.615482	0.127266	0.382156	1.12562	0.650204	0.575348	-0.0811858	-0.291677	-0.413906	-0.114402	-0.634739	-1.44936	-0.830932	0.778507	-0.267046	0.569717	-0.597296	-0.207756	-0.607786	1.20379	1.04072	-1.69835	-1.15821	-0.0847406	1.40011	0.558136	0.0691482	-1.93	0.676616	-0.151342	0.141697	-0.83061	0.174693	-0.628397	-0.272726
b0822	ybiV sugar phosphatase	-0.106887	0.894473	-0.251494	-0.727063	0.232034	-0.165474	-1.57593	-1.02448	0.462666	-0.517923	0.678822	0.0737158	0.0731134	0.137468	-0.091944	-0.277267	-1.13377	-1.24594	-0.756495	-2.14558	-0.338678	0.946795	0.901465	0.638532	0.523907	0.00636022	-0.047789	0.227926	-0.658247	0.592511	-2.72681	-1.90535	0.478765	0.421335	-0.163387	-0.431606	-1.03572	1.17042	-0.615335	0.893114	-0.183641	0.0759572	-1.73215	-1.60218
b0823	ybiW predicted pyruvate formate lyase	-0.701656	0.545341	1.28517	0.559824	1.472	0.0375222	-5.19179	1.17126	-2.30852	0.000736501	0.372563	1.08003	0.904384	0.801072	1.00315	0.669171	-1.38603	-1.01214	-0.887679	-0.956627	-1.15779	-1.29461	1.03461	-1.1765	0.0226878	-0.237332	0.184553	-1.08408	-2.03638	-0.312911	-6.01306	-5.68754	-0.23307	0.444788	0.143508	-0.558675	0.723396	-0.468871	-2.33842	-0.443627	2.00296	-0.109785	0.172608	2.09325
b0824	ybiY predicted pyruvate formate lyase activating enzyme	-0.708768	0.791293	1.71828	0.745639	0.630821	0.454314	-0.0179742	-1.48994	-1.00764	1.51391	1.00017	-0.0953717	0.411682	0.831795	1.12883	-0.405987	-1.00974	-0.8464	-0.798058	-2.35977	-1.3892	-1.2209	1.25181	-1.12489	0.901513	-0.458815	-0.334908	0.884349	-0.510494	-0.750524	-3.01362	-2.73917	-0.309255	0.29219	-0.27957	-0.623863	-2.57787	-0.34725	1.03906	1.23502	-2.11427	-1.2273	-1.16121	1.58179
b0825	fsaA Fsa	-0.820158	1.22459	0.189993	-0.901627	0.525876	0.417102	-0.707289	-0.289863	-0.147623	1.01987	0.310309	-0.108023	0.320855	0.288578	0.542336	0.195899	-0.036222	0.20976	0.519019	-0.643969	0.91686	-0.381178	0.471029	1.66432	0.389781	0.263144	0.24507	0.376842	-0.644339	0.69035	-0.418452	-0.170627	0.106152	-0.0344242	1.25909	-0.383303	0.808357	1.39587	-1.61564	0.798422	-0.785261	-0.0259341	0.667953	0.735063
b0826	moeB molybdopterin biosynthesis	-0.104901	1.12851	0.183922	-0.915997	0.146478	0.410253	-1.29312	-0.448297	-1.06009	1.45585	-0.302786	-0.506208	-0.262024	0.206483	-0.0183643	0.255541	0.943191	0.806818	-0.45414	-0.0900427	1.33129	-1.59856	0.0848085	0.616707	0.337795	0.163641	0.249233	0.552027	0.0240188	0.585351	-0.789361	-0.400567	0.42301	-0.626709	-0.403069	-0.0325439	0.989467	0.274805	-0.0840839	-0.679912	1.24779	-0.54874	-1.90041	-0.0334629
b0827	moeA molybdopterin biosynthesis	-0.827763	0.640946	0.225071	-1.19521	0.207598	1.38055	-2.2599	-1.01849	-0.721099	1.1005	0.983416	1.27266	0.0286769	0.89458	0.469656	-0.179686	-0.906456	-0.337163	1.48308	1.04855	-1.17014	0.594873	0.403976	-0.87913	-0.428991	0.125783	0.213045	0.174539	1.63205	1.57407	0.728748	0.872216	-1.21431	-1.13645	-0.775738	0.0205165	-0.506475	1.47934	-0.513296	0.277064	2.53459	0.913374	-1.91259	1.59956
b0828	iaaA beta; cleavage product of IaaA	-0.5841	0.816583	0.836626	0.981954	-0.0892062	0.761408	-0.178782	-0.572506	-0.236477	0.197669	0.985043	-0.387136	-0.411197	-0.332867	-0.267241	0.387599	0.655495	0.844437	-0.00511425	-1.93177	0.871729	-1.47714	0.943964	-0.232893	0.358426	0.557324	0.877247	-0.688679	-0.264147	0.640724	-2.02176	-2.09255	-1.08962	-0.246954	-2.62946	0.468826	1.30342	1.48035	0.171771	-0.18288	-1.08938	-0.0556139	-1.28133	-1.28949
b0829	gsiA gsiABCD glutathione ABC transporter	-0.0443131	0.492245	-0.217949	-1.46931	-0.124939	0.0207098	-1.27419	-0.372499	-1.44035	1.47679	0.994991	0.335709	-0.522755	-0.982258	-0.707775	0.259966	-1.04447	0.0756195	-1.74312	-1.9201	-5.18136	-0.997954	0.819487	-0.25846	0.0940272	-0.606127	-0.338018	-0.405815	-0.667812	-0.314936	-4.35093	-3.12538	-0.243627	-0.755512	0.469169	-0.406213	-2.10998	0.167081	-3.45731	-1.11343	-5.88602	0.427247	-2.00296	0.612948
b0830	gsiB gsiABCD glutathione ABC transporter	-0.539213	1.3488	0.00445312	-0.481925	0.487669	0.711486	-1.57327	-0.165043	-0.466374	0.431704	0.331835	-0.713882	0.274142	-0.28409	-0.341117	0.182418	-0.187065	-0.159818	0.811458	-0.622739	0.846632	-1.13391	0.569414	0.629111	0.686338	0.142391	0.100388	0.522188	-0.494229	0.60994	0.474171	0.368614	-0.126181	0.350911	0.119978	-0.0954442	0.235383	0.688858	1.21318	-0.550377	-1.87155	0.79542	-1.16481	0.537538
b0831	gsiC gsiABCD glutathione ABC transporter	-0.53632	0.958042	-0.104697	0.126805	-0.0266243	1.0717	-0.169636	0.475076	-1.62379	0.275315	1.04111	-0.572889	0.540398	0.0872748	0.226897	0.69488	0.244348	0.254612	1.46113	0.365556	2.75435	-0.847787	1.16862	-0.861038	-0.755987	0.544912	0.620045	-0.213029	0.993485	-0.109399	-1.1686	-1.34124	-0.63767	1.41505	0.649024	0.160219	-1.6283	1.03107	-0.675445	-0.379205	-2.86049	0.0834006	0.460534	0.716423
b0832	gsiD gsiABCD glutathione ABC transporter	0.295248	0.793677	-2.27596	0.451578	-0.429874	-1.08196	0.791912	-1.16001	-1.09589	-2.181	0.367158	-1.99639	0.807862	-0.480121	-0.460321	0.735078	-1.04727	-0.844196	-1.26041	-1.4536	-2.91408	-1.85695	-0.0245466	-0.697388	0.309542	-0.352759	-0.586207	0.333357	-2.38356	-0.502085	-2.6913	-2.77644	-1.29672	0.861988	-0.755537	1.25456	-3.29997	0.908711	-2.88532	-0.55647	-4.28896	0.278662	-0.0786893	-0.820772
b0834	yliF putative lipoprotein	3.20498	0.438399	-1.85669	-2.09541	-2.28325	-1.68959	-0.14128	-0.0826206	-1.26533	-3.76405	-0.808906	-0.402738	-0.613313	-0.539942	-0.972143	0.2124	-0.155576	-0.623479	-1.44725	0.989175	-2.45246	1.63595	-0.76029	0.07424	-0.478571	-0.494197	-0.293107	0.692805	1.02896	-1.55938	0.905613	1.03569	-0.416373	-1.29267	-1.89109	0.741917	1.86881	-0.551459	1.53202	-0.81659	-6.98778	-0.379057	0.648697	-0.637688
b0835	yliG predicted SAM-dependent methylase	0.144745	0.463921	0.409761	-0.292713	-0.118441	0.738722	-2.84204	-0.426192	-1.90661	-1.30773	-0.498084	-3.02768	-0.500357	-0.617528	-0.255764	0.0194108	0.594013	1.18592	-3.03298	-0.719613	1.635	-0.486176	0.157263	-1.70497	0.558591	0.245119	0.418133	-1.17066	-1.05517	-1.17126	1.59526	1.82263	-1.58274	-2.06647	-1.75338	0.614404	-1.16134	0.916971	-2.00208	-1.41461	1.4558	2.08723	-1.9574	-0.919932
b0836	bssR regulator of biofilm formation	-0.901001	0.750472	0.0685352	-0.091347	0.916824	LQ	-0.0863347	-0.391266	0.343489	1.78183	1.10708	-0.0791262	0.611604	0.246561	0.396951	0.36706	2.09652	1.83581	0.0018735	2.78421	-0.32555	1.07293	0.830629	0.872701	0.976263	1.12426	0.841732	0.541383	0.91669	0.388713	-0.0878025	0.136051	0.0333991	1.68012	2.16314	1.00131	-1.06918	0.630849	-1.13187	0.625018	0.855658	0.732598	2.03235	0.394539
b0837	yliI aldose sugar dehydrogenase	-0.334328	0.375306	-2.52429	-0.0896459	-1.41307	-0.193911	1.96322	-3.3474	1.25568	-0.348206	0.601167	0.507848	0.198439	-0.0580142	-0.253112	-3.62995	-0.0715006	0.517282	0.576744	0.0375007	1.54068	1.8096	1.82781	-0.118206	1.20046	1.25507	1.74925	-0.622027	-2.06923	1.93422	-4.73684	-3.85232	-0.169317	-0.421008	-1.01987	1.25697	1.1406	0.633993	1.85423	0.798351	-0.998565	1.26009	-2.13897	-1.43455
b0838	yliJ predicted glutathione S-transferase	0.883062	0.66279	0.276278	-1.55761	-0.78804	-1.44644	-3.8815	-1.71631	-3.86071	-2.70365	-0.0202667	-1.67658	-0.683548	-0.762103	-1.0569	-1.32207	0.371831	0.128275	-3.41902	-3.69874	1.35338	0.265853	0.364269	-0.456734	0.407056	0.279555	0.0569384	-0.871938	0.797841	-0.355945	-0.28887	-0.341554	0.361246	-3.40105	-0.926672	-1.27592	-1.71086	-1.85375	-0.300988	-2.00604	-5.55347	-1.43464	-3.59698	-1.47637
b0839	dacC penicillin-binding protein 6	-0.33036	0.485207	-0.247019	0.358838	-0.975509	-0.224601	0.350874	-3.04224	-3.81316	-2.92177	-1.59374	-1.89627	-2.30502	-0.636873	-0.367204	-2.05694	-3.95185	-3.50713	-1.11203	0.503574	-3.78038	-0.525201	0.239078	2.07543	-0.0313282	1.25335	1.02228	-0.456636	-2.30566	-0.487421	-3.56338	-2.60817	0.229856	-3.14122	-2.32462	0.724237	3.05907	0.530519	0.462356	1.54757	-5.41189	-1.5154	-1.248	1.29828
b0840	deoR DeoR transcriptional repressor	-1.36064	1.32149	-0.973354	0.110529	0.997245	0.199035	-0.12978	-0.364753	-0.385775	-0.18567	0.225225	0.951226	1.00917	-0.267506	0.0641006	-0.36289	0.13493	0.18933	0.184783	-1.00359	0.312667	0.952231	1.17394	0.765001	0.556306	0.122704	0.252847	0.546523	0.417951	1.1962	-0.690723	-0.0263899	0.353019	1.50236	1.95089	1.27393	-0.337295	0.841565	-0.827802	1.36914	-1.08566	1.75744	-0.692278	1.71378
b0841	ybjG undecaprenyl pyrophosphate phosphatase	-0.701392	0.933106	-0.844652	0.214792	0.218758	-0.158897	-1.29436	-0.625295	0.0857087	-0.625999	-0.387429	0.421862	0.12992	0.268221	0.158621	-0.877108	0.234416	0.15048	0.527223	-0.243844	1.81169	1.57832	0.526393	1.28279	1.21209	1.00671	0.917489	0.624189	0.250498	0.676804	3.04751	2.76215	0.857269	1.55004	1.39567	0.839952	-1.52158	0.223695	0.691148	0.592694	0.13439	-0.65359	0.513548	0.629678
b0842	cmr MdfA/Cmr MFS multidrug transporter	-0.134269	1.12453	-0.911088	-0.927328	-0.685177	-0.271833	-2.16402	0.0529414	-0.671859	0.102517	0.242877	0.552316	0.600796	0.0257464	-0.0839454	-0.232235	0.58746	0.645573	0.933003	0.171689	0.918089	-1.05625	0.399357	0.821216	0.486042	-0.0992049	-0.0448731	0.247099	1.13778	0.708095	0.28881	0.359814	-0.032071	0.745395	0.375713	-0.102497	-0.993261	0.129415	0.484499	0.656174	-2.49592	0.318727	0.178422	-1.9906
b0843	ybjH predicted protein	0.229515	0.366817	-0.299185	-1.44181	-1.23607	-0.970078	-2.44839	0.611492	-1.23759	-1.16277	-1.62804	-1.2134	0.142334	-2.15922	-0.434627	-0.967113	-3.39871	-0.995669	-1.21019	0.108784	1.03706	-2.54168	0.047889	-2.48003	1.25009	-0.578595	-0.721956	-0.782278	3.4307	-0.785725	-5.78416	-2.89399	-0.742665	-1.43889	0.0396327	-2.27266	-2.53307	0.448951	-3.84481	-2.30733	-4.57303	-2.01783	0.846491	-3.03783
b0844	ybjI FMN phosphatase	0.935174	0.767334	-0.565343	-2.11444	-1.14222	0.187519	0.620404	-1.39738	-0.508076	-2.22845	-0.628986	-1.51895	-0.344814	-0.486351	-0.806812	-0.900915	-1.2775	-1.30444	-2.69997	-3.27461	1.08961	1.24181	0.13299	-0.760748	-0.701391	-0.233642	-0.334114	-0.47589	-1.4331	-0.320439	-2.44706	-2.67155	-0.612948	0.257817	-1.4777	0.360942	-0.301919	0.744081	0.157983	-2.11224	-3.62138	-0.266665	0.746255	-1.94848
b0845	ybjJ predicted transporter	-0.131444	0.982546	0.43064	-0.589485	-0.338812	-0.504944	-1.37516	-1.71535	-1.76935	-1.75524	-0.442621	-0.0915414	0.0865236	0.702575	0.705196	0.36175	0.584872	0.775376	-1.06425	-0.603074	-0.628349	-1.52712	0.835566	0.101909	-0.445042	0.52513	0.460376	-0.589465	-0.594674	1.38505	-3.0582	-2.76983	-0.614493	-0.307899	-0.787356	-0.267167	-0.862358	0.574953	-0.874825	0.574132	-2.49361	-0.898711	0.0528488	0.0898372
b0846	ybjK predicted DNA-binding transcriptional regulator	-0.430118	0.815462	-1.06359	0.515134	-0.631238	0.199008	-1.4014	-0.450634	-0.404009	-0.366479	0.024601	0.474232	-0.0591868	-0.190053	-0.207725	0.904018	0.29948	0.283024	-0.0209452	-1.53628	0.579652	-1.26654	0.785551	0.141712	-0.309184	-0.0510786	0.268662	-0.189132	0.645085	0.299618	-1.78176	-1.61692	-0.930549	0.227856	-0.833594	-0.581552	-1.51544	0.262576	-1.04674	0.607879	-1.24909	0.955358	-0.800147	0.275058
b0847	ybjL predicted transporter	0.271362	0.525378	-4.56343	-1.4182	-1.38184	-0.80064	-3.78712	-1.55022	-1.77462	-2.49447	0.0130942	-2.99386	-1.14264	-0.97457	-1.03604	-0.990166	-2.95955	-2.43931	-1.86469	-5.17329	-1.57275	-2.0359	-0.892945	-1.53866	-1.44154	0.240094	0.543697	0.186851	0.137717	1.65667	-4.12023	-3.31719	-1.14857	-1.43727	-1.50453	0.188104	-2.78254	0.210199	-2.9835	-0.74703	-3.39142	0.122235	-1.91348	-0.67255
b0848	ybjM predicted inner membrane protein	0.966781	0.45558	-3.16489	-3.1354	-1.4962	-1.81562	-2.79234	-0.67896	LQ	-4.1596	-0.457971	-2.32364	-1.1118	-0.546194	-1.02948	-0.416428	-0.263402	-0.583739	-1.57973	-3.62332	-3.11303	-1.62692	-0.549983	-0.00862992	-0.288822	-1.00942	-1.16704	-1.21296	-2.0891	-2.24074	-4.78147	-4.76995	-0.474725	0.309594	-0.308163	-1.85375	0.693822	-1.3049	1.88261	1.26058	-3.50133	-3.55875	-0.536894	-2.46728
b0849	grxA oxidized glutaredoxin 1	1.39404	1.08847	-2.10768	-1.42618	-0.557245	-1.49516	-2.0588	-0.623386	-1.09724	-1.60863	-0.776679	0.167656	-1.4182	-1.3787	-1.50575	-0.154772	0.0453143	-0.465363	-0.642352	1.05814	-2.02928	-0.548093	-0.953018	-1.30144	-0.819045	-0.308906	-0.663622	-0.721254	-1.40449	-1.47477	-1.56179	LQ	0.213953	-0.726636	0.0257405	-1.04198	-0.0263719	-1.0343	1.27868	-0.0773729	-2.25389	-2.05654	-0.326402	-2.08016
b0850	ybjC predicted inner membrane protein	0.715509	0.826877	-0.949367	-0.770924	-1.02113	-0.696268	-2.57093	1.25583	-2.02431	0.50128	-0.0588023	3.3063	-0.487703	-0.424341	-0.264651	-1.50091	0.696242	0.255218	-1.43897	-0.186379	-0.566974	-0.0719588	-0.924774	-1.23337	0.550869	0.112897	-0.162331	-0.628469	-1.32093	-1.24762	-1.75114	-1.5818	0.217424	0.583875	1.17254	-1.22692	-0.100367	-0.522482	3.60194	4.05975	-2.31199	-1.54181	-0.197961	-2.45237
b0851	nfsA NADPH nitroreductase	-0.309511	0.647357	1.24211	-0.0577402	-0.352538	-0.780116	-2.9734	-1.26996	-0.328218	-1.18554	0.858307	-1.23254	0.438235	-1.84431	-1.43199	-0.599134	-0.244689	-0.0287876	-0.430789	-1.31014	-1.51159	-1.19335	0.102303	-1.29759	-0.699088	-1.43032	-0.895668	0.732337	-1.65334	-0.568012	-3.30244	-2.83127	-0.39022	-1.69015	2.2276	-0.0943383	-0.99228	0.981425	4.03158	5.78627	-3.45247	-1.54491	-1.54582	-2.07244
b0852	rimK ribosomal protein S6 modification protein	-1.30227	0.526601	-0.362688	-0.145323	0.799563	0.853401	-0.894318	2.80542	-1.32694	0.695772	0.832856	0.494384	0.584343	-0.243984	0.585109	0.727595	0.957459	1.93587	0.317342	-1.68578	1.15005	-0.58001	2.30027	-0.723013	2.60872	0.357657	1.06935	0.681511	0.600194	0.885983	-1.60118	-1.56794	1.5585	-0.701179	-1.47127	-0.631436	-1.63761	2.30298	0.00279973	2.63689	-1.99279	0.98687	-0.0899868	0.905903
b0853	ybjN predicted oxidoreductase	0.187146	1.11112	-1.87141	-0.617028	-0.480191	-0.935962	-1.38419	-1.29823	-1.57077	-1.28333	0.0491053	-1.2457	-0.314389	-1.67413	-1.5616	-0.511101	1.5546	1.60994	-1.0391	1.06	-1.71539	-2.05186	0.457401	1.51679	0.365938	0.563353	0.557065	0.02155	-1.23974	-1.21259	0.464491	0.629319	0.864124	1.07103	-0.0893193	0.0147619	-2.26326	-0.351432	2.216	-0.0314413	-2.37471	-1.10797	0.39362	-1.28755
b0854	potF putrescine ABC transporter	-0.939442	1.04708	0.708836	-0.425133	-0.206065	0.484183	-0.232405	-0.781813	-0.862978	-1.22197	0.457175	0.980368	0.603643	0.123715	0.21116	0.835057	0.0703682	0.338848	-1.19373	0.865499	-2.41313	-1.23885	0.181586	0.940575	0.0768529	-0.00959127	-0.0668046	0.199558	-0.327295	0.383189	-0.909851	-0.974546	0.229912	-1.68116	-1.48133	0.878247	-2.46712	-0.223119	-0.431156	1.16168	-2.55359	-1.62039	-0.451667	-0.752248
b0855	potG putrescine ABC transporter	-0.897115	0.700791	0.36043	0.0589334	-0.54502	1.30508	0.83294	-1.16005	-2.00749	-0.354879	0.768918	-0.643207	0.942484	1.29556	1.3181	-0.214214	-1.48706	-1.59882	-1.08984	0.418073	0.68558	-0.957443	1.05819	-0.769092	0.390419	0.765893	1.1835	-0.406881	1.47428	-0.642263	-2.27607	-2.79517	-1.04988	1.40535	-2.69433	0.0317305	-1.05472	0.500469	-2.48366	1.11311	-2.67809	-0.86521	-0.993041	1.46555
b0856	potH putrescine ABC transporter	0.963104	0.832186	-0.0544638	-0.836762	-0.953574	-1.70106	-2.57716	-1.59302	-3.61669	-2.3243	-0.764763	0.476001	-0.83265	-0.416141	-0.81084	0.24209	-0.241988	-0.284968	-1.38371	-3.62957	-2.39357	-2.76209	-0.720593	-0.256518	-0.162251	-0.707436	-0.85686	-1.13239	-3.4992	-0.349008	-3.4423	-3.94556	0.250389	1.11595	-2.14152	0.0381766	-0.599678	-1.87079	-0.104812	-0.035822	-4.40719	-0.677562	0.743371	0.219667
b0857	potI putrescine ABC transporter	-0.296226	0.926262	-1.28318	-1.181	-1.20321	-1.82549	0.807003	-0.985787	-3.13407	0.168073	0.187668	-1.66875	-0.403004	-0.512281	-0.519639	-1.66346	-2.56778	-2.31422	-1.55379	-0.820406	-2.47386	-3.25181	-0.398894	-0.556601	1.46003	-0.398607	0.156606	-2.28419	-1.91638	1.0558	-2.8373	-2.86794	-0.16568	1.07746	-1.50134	-0.35492	-2.66068	-1.60141	-3.08403	-0.742293	-2.06968	-1.20534	-1.14974	-1.39578
b0858	ybjO predicted inner membrane protein	0.682728	1.42634	-0.251172	-0.904732	0.0420983	-0.175751	-0.0890858	-0.0891065	-0.911344	-0.5348	-0.629149	0.0259692	-0.698727	-0.0627769	-0.0851775	-0.11775	0.530316	0.657518	0.642973	-1.91886	-0.341528	-1.33261	0.00280908	-0.232981	0.504879	-0.69243	-0.49784	-0.991731	-0.630102	0.30556	-0.175924	-0.407477	0.00810136	0.42856	-0.494362	-0.567978	0.447757	-0.343465	-1.08428	-0.800997	0.686074	0.880742	-1.17576	-1.51002
b0859	rumB 23S ribosomal RNA 5-methyluridine methyltransferase	-1.46661	0.832287	1.97406	0.934355	1.53245	1.81092	2.24621	2.11018	0.580775	1.47061	1.49897	-0.248116	0.370375	1.58152	1.52699	0.784069	-0.066823	0.593338	-0.0603722	-1.5665	0.757193	-0.555527	1.56722	1.05331	1.30686	0.834932	1.04895	0.49919	1.36002	0.729581	-0.946024	-1.05527	0.183674	-0.4801	1.34894	-0.139024	0.86486	0.253164	-1.5906	0.63338	-1.26116	1.56263	0.21659	1.31875
b0860	artJ arginine ABC transporter	-0.441503	1.2563	-0.644098	-0.736131	-0.145074	0.33133	-1.1018	LQ	0.0446882	-0.00508821	-0.430053	-0.914196	0.0400536	-0.482191	-0.328201	-0.881151	-0.475774	-0.329811	-0.745004	-1.25296	-1.11742	1.2757	0.553566	1.33031	0.183404	-0.341355	-0.413407	0.626805	2.23664	-0.658566	-1.83443	-1.51281	-1.13648	-0.584848	-0.267875	1.75059	-1.38979	-0.0388086	-1.2346	-0.945312	1.75644	-0.557346	0.700257	0.754667
b0861	artM arginine ABC transporter	-0.242304	0.93919	0.429296	-0.94205	-0.408516	0.215498	-2.15162	-1.58759	-1.29442	0.621983	0.321027	-0.770946	0.773571	0.596193	0.328663	0.595347	-1.2637	-1.17471	1.45087	-1.21917	1.05437	0.0710393	0.51916	-0.637559	0.805056	0.136554	-0.184856	-0.045948	0.199611	0.135708	-3.08159	-2.39611	-0.374403	0.443287	-0.529832	0.190063	-2.0391	0.4267	-2.3674	0.403888	-2.78565	2.4041	-0.387501	-0.851945
b0862	artQ arginine ABC transporter	-0.163485	1.47862	-1.47254	0.38812	0.00859351	-0.698428	-1.66084	-1.13061	-1.617	-0.769723	-0.534068	1.2718	0.259598	0.329373	0.410626	-0.369472	-1.42876	-1.30844	-0.793858	-1.38107	-0.596749	-1.46167	-0.204039	-0.581006	0.437225	-0.417767	-0.354023	-0.74186	1.22106	-0.82826	-1.64365	-1.48284	-0.263921	-0.63707	0.305272	-0.413124	-1.86836	0.373359	-1.23507	0.801788	-1.76881	-0.568115	-0.310933	-1.00138
b0863	artI arginine ABC transporter	-0.404838	1.50797	-1.16929	0.533077	0.40049	0.369548	-0.996533	0.121619	-0.182757	-0.445267	0.112102	0.826753	-0.0691886	-0.340779	-0.422885	0.239859	-0.169571	-0.230526	-0.995264	1.494	-1.54593	0.397563	1.15938	1.04449	0.30504	0.593162	0.526578	0.264411	1.52637	-0.485874	-1.93503	-1.62911	0.0720696	-0.982483	0.192925	0.872412	-0.886398	0.570911	0.945276	-0.556494	-1.74231	1.2493	-1.35622	-1.2877
b0864	artP arginine ABC transporter	-1.22048	0.851819	0.650088	-0.720064	-0.589482	1.02579	-2.07608	-0.147088	-0.880536	-0.591358	0.635704	1.23404	0.315714	0.140164	-0.107538	-0.040568	-1.08804	-0.747254	-0.468326	-1.51603	0.385013	-0.240165	1.20362	0.775349	-0.411482	0.115902	0.248747	0.86922	-0.129968	0.58294	-2.05568	-1.83046	0.559114	-1.13021	0.45822	1.16063	0.580462	1.1863	0.354052	1.56589	-1.9851	1.62986	0.142032	0.594282
b0865	ybjP predicted lipoprotein	-1.19419	1.09579	0.367935	-0.516113	0.559669	0.65222	-0.986183	-0.541391	0.683955	-0.226798	0.209735	0.288929	0.459467	1.17212	0.66567	-0.241571	0.73948	0.803973	1.43767	-1.70689	0.071134	-0.770815	1.53878	0.295131	0.650873	-0.0392665	0.0110135	-0.51342	-0.248525	1.00676	-0.461763	-0.795784	-0.268547	-0.50391	-0.537668	0.491066	1.2312	1.2887	-1.27028	0.323079	-1.49614	0.72354	0.162114	0.265052
b0866	ybjQ conserved protein	-0.380595	0.610212	-0.179046	-0.581822	0.115282	-0.0738459	-1.30607	-0.773336	-1.02021	1.29366	-0.0175372	1.76666	-0.766599	-1.30093	-0.44494	-0.450641	-1.26477	-0.836075	0.994668	-2.10539	-0.0397521	-1.36214	0.106182	-0.360736	-0.221169	-0.29825	-0.00360566	-1.00267	0.191408	1.01129	-1.42316	-1.4939	-0.789695	-1.03394	-0.796164	0.992634	3.15873	0.699396	-1.15006	-0.298339	-1.89775	-0.234183	-0.20521	-0.889602
b0867	amiD anhydro-N-acetylmuramoyl-L-alanine amidase	-1.11467	0.581089	0.984051	1.37136	-0.142015	0.113697	-3.60035	-0.200472	-1.64348	2.49545	0.206413	0.51712	-1.05635	0.395758	0.502233	-2.4845	-0.530414	-0.411029	0.319838	-2.22608	-1.44237	1.11233	0.852101	2.15317	1.1321	-0.698986	-0.775123	-0.111648	0.09532	2.14252	-1.67287	-1.8479	-1.31715	2.33097	-0.461727	0.691004	3.03905	1.20503	-1.64392	0.767058	-1.40619	0.836146	-0.805456	1.49055
b0868	ybjS predicted NAD(P)H-binding oxidoreductase with NAD(P)-binding Rossmann-fold domain	-0.403358	1.81608	-0.604421	-0.163969	0.186767	-0.46169	-1.36663	0.313337	-1.11814	0.330176	0.335979	-0.181707	0.251861	0.373475	0.334229	-0.181913	-0.516827	-0.241659	-1.66064	-2.08385	-0.179706	0.101257	-0.0455691	0.682044	-0.313666	-1.12432	-0.909349	0.095036	1.131	-0.219644	-2.15771	-2.07675	0.632017	0.938439	0.438887	0.136076	-1.78192	-0.352047	0.53603	0.500116	-0.144822	0.178825	-0.322471	-0.151051
b0869	ybjT conserved protein with NAD(P)-binding Rossmann-fold domain	-0.931155	0.813366	-1.10144	-0.332372	0.0936833	-0.372596	-2.99985	0.48782	-2.09311	0.896646	0.321831	-0.204829	0.819756	1.29595	1.4525	0.590513	-0.280585	-0.338868	1.12505	-2.95249	-1.48212	-1.17596	0.640055	1.35783	0.382855	0.472329	0.238123	-0.663683	0.289372	1.27283	-1.48852	-2.93853	-1.05856	0.319492	0.180494	-0.472828	-2.80667	0.7702	-1.93728	0.979264	-2.33897	0.231439	-0.0656941	-0.465407
b0870	ltaE LtaA	-0.350283	0.729955	-0.0541679	-0.787499	-0.0512972	-0.561385	-0.85576	-1.36261	-1.34895	-1.94744	1.0697	1.93888	0.685183	0.10409	0.11201	0.308302	0.0925984	0.0362681	-0.0903626	-2.01135	-0.335847	0.0546627	0.770242	0.0983942	-0.167783	0.980209	1.2404	-0.623096	2.31082	1.20392	-0.723003	-0.402707	0.371535	1.00912	0.468853	0.54792	-4.1481	0.889061	0.787418	-0.229567	1.26597	-1.99076	-0.111483	0.759733
b0871	poxB pyruvate oxidase monomer	-0.686245	1.04645	-0.338477	0.831906	0.358961	0.104644	-0.341931	LQ	-0.679144	0.686331	0.727235	1.0767	0.600952	0.396497	0.576357	0.486581	0.441742	0.541003	-1.11141	-1.79038	0.221506	0.594661	0.543071	1.20279	0.549841	0.746377	0.676496	-0.195575	0.879619	-0.262222	0.966959	1.15489	0.733014	0.592889	0.962294	-0.311565	-2.25442	-0.678572	0.768285	0.103654	-0.328068	-0.653998	-1.06226	-0.332913
b0873	hcp hybrid-cluster protein	-0.246435	0.546856	0.706748	-1.24872	-0.100411	-0.189915	-4.90546	-2.57445	-2.36371	-0.262863	-0.306475	1.5819	0.298098	0.275016	0.617244	-1.40101	1.23767	1.54562	0.361513	-1.43765	0.0863668	-0.495573	0.562184	-1.67825	0.725828	-0.52786	-0.104666	-0.783017	1.24067	1.38139	-2.14776	-1.23325	-1.13361	-0.37931	-0.543745	0.0936545	-4.7646	-0.693309	1.78341	0.28615	1.43683	1.17979	-2.29351	-0.144041
b0874	ybjE predicted transporter	1.58848	0.247478	0.430586	-3.34356	-2.93361	-4.01356	-13.6136	2.07882	0.455829	-4.36916	-1.03821	-0.359016	-1.48476	-3.34807	-3.98095	-1.43267	4.0414	2.86749	-1.78334	1.28159	6.00414	2.18278	-1.46976	0.182444	0.0154344	-0.0105437	-1.36509	-3.1309	-4.54977	-4.28678	-6.92328	-8.51911	-0.747808	1.35764	-1.00428	-1.17287	0.845601	-3.93929	-6.96836	0.675741	-18.4546	-2.46641	0.566026	-7.79849
b0875	aqpZ AqpZ - water MIP channel	0.0961111	0.696628	-1.07398	0.407955	-1.9806	0.881645	0.0601615	-2.45527	-1.55166	-1.40856	0.600939	1.13967	-0.435204	-0.241115	-0.460852	1.68219	0.892496	0.622086	-1.71583	0.886257	-2.08994	-0.966518	0.936807	0.634675	-1.19736	0.139034	0.269826	-0.225473	-1.75932	-0.280975	1.37691	1.51404	-1.63004	-1.35486	-0.604757	1.9836	-1.36123	1.2648	-2.35259	0.676161	-1.02539	1.06474	-1.35375	0.0331054
b0876	ybjD conserved protein with a nucleotide triphosphate hydrolase domain	-0.406815	0.633932	1.06997	-0.450537	-0.473439	-0.0702413	0.455755	0.675615	-1.11494	-0.972243	0.410519	-0.209759	0.516958	0.723558	0.809289	0.264449	0.129023	0.294799	-0.31623	-1.39472	-1.37791	0.465996	0.370246	-0.243998	-0.322603	0.292347	0.60663	-0.244939	-1.23145	-0.702474	-2.64003	-1.89485	-0.231852	0.365465	-1.95941	0.67032	-2.88	-0.269831	-0.907568	0.129014	-2.64462	-0.951225	0.134185	-2.26499
b0877	ybjX conserved protein	-0.564984	0.928896	0.649736	-1.06474	0.554673	0.276066	-0.556215	0.0184708	0.472258	0.782982	-0.169248	0.111459	0.324351	0.517619	0.37211	-0.591078	1.2177	0.992835	-0.744882	-2.09506	0.346525	-0.229682	0.586901	0.123147	0.486631	0.895885	0.796845	-0.256892	-0.634737	1.11174	2.20035	2.1338	0.629554	0.836615	-0.0154055	0.59374	0.70013	1.59019	-1.87156	1.08652	-2.21603	0.902586	-0.933064	-1.36339
b0878	macA MacAB-TolC Macrolide Efflux Transport System	-1.54756	1.10108	2.04328	0.72406	0.772057	0.829809	-0.352653	0.748371	1.08183	-0.135551	0.420431	-0.361702	1.72309	0.395352	0.190535	0.87614	-0.139431	-0.166918	0.316169	-1.40945	-1.06111	-0.172634	1.85544	-0.981539	-0.0409608	0.748389	0.758069	1.10584	-0.266317	-0.0109433	-0.883587	-0.758762	-0.33421	1.78256	-0.291056	0.413225	1.86141	0.735087	-0.898069	0.628592	-1.51356	0.228743	-0.94796	1.39137
b0879	macB MacAB-TolC Macrolide Efflux Transport System	-0.302984	0.516571	0.162855	-0.964392	0.310816	-1.01819	-0.133394	-0.885427	-2.46301	-0.288673	0.0826727	1.74232	-0.327492	0.489192	0.943109	-0.112852	-1.18333	-2.4124	-2.37399	-4.06949	-0.108534	-0.92236	-0.0376449	-0.562445	-0.687076	-0.837914	-1.31132	-1.96524	-1.785	-0.543743	LQ	-4.27034	-0.377688	-0.90227	-0.545506	-0.104659	-5.21184	-2.01211	-1.32247	-0.260714	-4.38015	-1.93162	0.965353	-1.87588
b0880	cspD DNA replication inhibitor	-0.474281	0.577214	-1.0542	0.50962	0.934033	0.697849	-1.18364	-0.419787	0.238035	1.97603	0.205371	0.893488	-0.262771	0.317658	0.782643	-0.34284	1.66034	LQ	0.702359	-0.863502	-1.33633	-0.546011	1.17429	0.283151	1.07846	1.07683	0.925604	-0.236191	0.727687	0.759147	2.66661	LQ	-0.806562	0.2944	-0.352619	1.09523	-0.649789	1.28783	-0.339691	0.846519	-0.94844	0.51283	2.36417	2.877
b0881	clpS specificity factor for ClpA-ClpP chaperone-protease complex	0.818464	0.936184	-0.530978	-0.563498	-0.473441	-0.891001	-2.49358	-0.910336	-1.23309	-1.40791	0.122016	1.60462	-1.86598	-1.26892	-1.24831	-0.704386	-1.92143	-1.58108	-0.809094	-2.16986	-2.59086	0.356604	-0.541052	0.0332716	0.492842	-0.691881	-0.544991	-1.92944	0.515817	-0.8775	-2.18021	-1.83078	0.884162	-0.604412	0.166036	-1.36898	0.880201	0.602819	1.33181	-1.04511	-2.12282	-1.84886	-0.348842	-2.19203
b0884	infA protein chain initiation factor IF-1	-0.64251	0.442714	-1.93598	0.134226	-1.27844	1.18705	-1.25806	LQ	-1.14008	1.22516	-1.52359	1.34665	-1.93753	-0.0185744	0.63305	-1.058	-0.026597	1.78468	0.890716	-0.776246	-2.33298	-0.434827	1.16714	-0.105846	0.858593	0.298021	0.639585	-1.29056	1.29667	1.52259	-1.49184	LQ	-1.06903	-0.0034004	0.0180933	0.0642819	-0.963298	2.03119	-0.708356	1.44703	-0.822976	-1.49176	-0.497473	0.904683
b0885	aat leucyl, phenylalanyl-tRNA-protein transferase	-0.282334	1.0483	0.669188	0.427694	-0.261275	0.0582812	1.47248	-0.338321	-1.81262	-0.0596733	-0.192056	0.927576	0.0721242	-0.17673	-0.379565	0.230306	1.46949	1.23413	0.31846	-1.8868	-0.661153	0.66163	0.270471	0.213186	0.74165	0.234775	0.234411	-1.15052	0.256403	-0.054899	-2.59596	-2.46473	-0.111098	0.414065	0.654414	-0.474138	-2.445	0.435937	-2.17472	-0.0627439	-2.03649	0.694945	-1.91519	0.541205
b0886	cydC cydDC glutathione ABC transporter	-2.47782	0.699372	-0.640714	0.350251	-0.453581	0.657588	0.424693	0.798787	-1.49335	0.757614	-0.0934242	1.31424	0.830575	1.29587	0.749884	0.0779905	1.00183	1.29993	1.08362	-0.479342	-1.361	-0.739098	1.59245	-1.07127	1.82004	1.5275	1.49661	-1.43892	1.10197	1.27017	-0.449912	-1.54912	0.0472771	-0.262005	-2.13139	0.775281	-1.00744	1.65238	-1.32335	1.76319	-0.920367	-0.811392	0.432869	0.0151896
b0888	trxB thioredoxin reductase monomer	-1.53444	1.08189	0.944405	-0.898259	0.517361	0.61816	-0.833712	0.0984497	0.231177	0.0292298	2.17368	1.84913	1.61202	1.35293	1.22354	4.7685	3.95088	4.00886	2.13348	1.85987	1.52045	2.12049	0.583672	1.65046	0.633841	1.14387	1.14514	2.06512	2.00773	2.52291	2.82307	3.04906	-0.290335	-0.637206	0.316114	-0.134641	-1.27354	0.240651	-2.10146	0.178368	3.3453	0.415664	1.42148	0.00950252
b0889	lrp Lrp transcriptional dual regulator	-0.791049	0.652194	1.00787	1.74465	1.10495	0.992336	0.957638	1.71031	1.50977	0.869279	2.24786	0.00395555	1.49673	0.811263	0.508936	3.16381	3.97249	3.51898	1.98382	1.05829	0.962049	2.67269	-0.0207396	0.729732	-0.674522	0.52116	0.240833	1.32497	2.97426	1.65744	0.511278	0.590625	1.09567	0.127374	0.275347	-1.73514	1.98603	5.93035	-1.91107	0.888307	-1.33615	0.25497	1.04216	3.94761
b0891	lolA periplasmic chaperone, effects translocation of lipoproteins from inner membrane to outer	-1.41481	1.65195	-0.144171	0.0392405	-0.186445	-0.283353	0.153036	-0.439775	-0.667584	-0.0933419	0.470725	-0.289213	-0.304661	-0.275102	-0.0860237	0.156602	-0.563446	-0.442083	-0.311324	-0.967184	-0.455093	-0.46467	0.00727706	-0.749222	-0.00568527	-0.0356073	-0.0350122	-0.067282	-0.437916	0.245544	-0.0748792	0.112047	0.495785	-0.62237	-0.136082	-0.363669	-0.873536	-0.173583	-0.590593	-0.123087	-0.655957	-0.0877842	-0.578283	-0.172004
b0892	rarA recombination factor	-0.609188	0.549515	1.04633	-1.35081	0.198741	-0.464727	0.14878	-0.141506	-0.544008	0.121292	0.288696	-2.26125	0.0770869	-0.288278	-0.491681	-0.087219	-2.49408	-2.66392	1.83344	-2.89467	-0.462232	-2.89542	1.01606	-2.83252	0.600512	-0.728345	-0.497316	0.0241382	0.00858869	0.576048	-2.3353	-2.01522	-2.08143	-2.17175	-0.93391	0.485317	-1.41012	-0.76579	-3.31849	0.101576	0.959668	1.82433	-2.73221	-1.32572
b0893	serS seryl-tRNA synthetase	-2.10647	0.799791	-1.18918	-0.347688	-0.0128097	0.455967	-1.24917	-0.254034	-1.59765	-0.154432	-1.03964	0.208088	-0.720333	0.113914	0.481551	-0.887695	-0.608572	-0.545396	1.38335	-1.36169	-2.01858	-1.49378	0.683967	-1.05227	0.239107	0.243033	0.196674	-2.11557	0.193855	0.323941	0.407966	0.504091	-1.44616	0.131435	-1.00487	-0.844459	-1.46753	0.362	-1.30812	0.180978	-1.01354	-1.06011	0.859958	-0.0014771
b0894	dmsA dimethyl sulfoxide reductase, chain A	-0.46615	0.505195	-0.0212386	-2.52925	-0.736443	0.0101649	1.19975	LQ	-3.87047	-1.39871	-0.794929	-1.6708	-0.959162	-0.285009	0.163684	-0.0958226	-0.632101	-0.570803	0.302952	-1.43774	-0.43066	-2.4173	0.51674	-0.626585	-0.672134	-1.52418	-1.22126	-1.6416	0.677384	0.767671	-0.199272	0.505522	-0.637333	-1.50333	-1.11277	0.268322	-0.803845	0.23147	-1.77803	1.13635	-5.16092	-0.469381	-2.69987	-2.86867
b0895	dmsB dimethyl sulfoxide reductase, chain B	-0.939065	0.647778	0.910731	1.487	0.716491	1.51044	-0.852381	-1.18947	-0.0401248	0.293466	1.51504	0.149246	1.74356	1.89407	1.61451	0.188983	2.5138	2.34227	-0.17698	-2.53188	-1.12922	-1.79096	0.520666	1.23622	1.1217	1.80765	1.82615	0.719462	0.104191	0.433235	0.836031	0.798157	-0.640761	0.822211	0.533238	-0.038891	0.639779	1.44964	-1.10091	1.58807	-2.45898	0.198318	-1.15239	2.65192
b0896	dmsC dimethyl sulfoxide reductase, chain C	-0.907756	0.935213	-0.264891	-0.430898	-0.428277	1.35804	-1.66687	0.227291	-1.12722	-0.371513	0.593951	-0.865691	0.699573	1.32595	1.51151	-0.0266721	-1.38557	-1.22262	0.554659	-2.48798	2.67513	-1.14043	0.791358	-0.322412	-0.233621	1.23455	1.20374	1.19037	-0.58496	1.47813	0.579784	0.0336261	0.19096	1.59942	0.355829	0.959441	-0.610299	1.55305	-0.412219	0.639832	-2.72934	0.620613	0.378564	0.427526
b0897	ycaC predicted hydrolase monomer	-0.00026043	0.756161	-0.0389537	-0.854796	-0.856949	-0.22213	-2.23378	-1.06066	-1.55398	-0.366292	-0.411192	-0.768855	0.680328	-0.141902	0.0427681	-0.320873	-1.82235	-1.43145	0.455197	-0.512209	1.22307	0.232755	0.324751	-0.845497	-0.314922	-0.0749683	0.154532	0.204176	-0.424707	1.67552	0.0447033	0.190182	-0.958894	-0.799551	-0.0323383	-0.381454	-0.45004	0.284128	1.22427	-0.268879	-2.13495	1.718	-0.23817	0.724219
b0898	ycaD YcaD MFS transporter	-0.0629942	1.0882	0.509429	-0.96797	-0.343245	-0.790617	-1.49911	-0.875363	-2.05117	-0.812955	-0.0239545	0.309276	-0.111233	-0.138407	-0.0667558	-0.618686	-0.704373	-0.561168	-0.71889	-1.46544	0.60678	-0.290573	0.366527	0.613778	0.399384	0.379878	0.280642	0.160839	-0.327568	-0.590461	0.720833	0.929131	1.1825	1.31954	1.22585	0.668036	-1.86029	0.411293	-1.42482	0.246286	-0.614857	0.6072	-1.01109	-0.401936
b0899	ycaM YcaM predicted APC amino acid transporter	2.01658	0.540177	-0.704659	-0.184675	-1.41333	-2.24405	-0.872592	-0.159375	-4.82043	-5.7758	-0.857999	-0.467062	-1.77652	-0.71937	-0.0161122	-1.40684	-1.66112	-1.74296	-0.984616	1.42375	0.595545	-0.00712239	-1.43072	-1.52942	-0.497513	-1.16964	-0.829201	-1.28357	-0.268452	-0.288255	-2.80405	-2.8246	0.00669414	-0.0903331	-0.388837	-0.821895	-2.43529	-0.975737	-1.19876	-0.710604	-0.409216	-2.51971	-1.06522	-2.45951
b0900	ycaN putative transcriptional regulator LYSR-type	2.88118	0.597226	-2.20334	-0.649269	-1.98251	-2.88875	-2.03503	-0.47958	-5.05152	-5.00492	-0.756838	0.00995592	-1.38085	-1.46009	-1.36568	-0.170863	-0.150568	0.0460407	-0.929609	0.260858	-1.95252	1.26885	-1.29843	-1.28406	-1.20071	-0.796297	-0.825304	-0.0398204	-2.25529	-1.56771	1.84891	2.27772	0.540459	-0.421594	-0.301184	-0.102597	0.731685	-3.01616	0.71542	-0.830746	-0.204941	-1.80132	-0.413377	-1.51054
b0901	ycaK YcaK	2.38965	0.685343	-0.451306	-1.66583	-1.25166	-1.20296	-2.74267	-0.194942	-1.50924	-3.14095	-0.962996	0.0642516	-0.0463264	-0.762455	-0.99032	0.0745279	-0.866227	-1.55764	-0.398779	-0.404514	-1.02251	0.0875767	-1.02131	-0.761058	-1.47499	-0.462724	0.0117638	-0.746287	-0.128913	-0.331733	-3.47089	-2.9421	-0.139261	-0.835651	-1.28422	-0.851247	-1.77944	-0.64102	-0.0377695	-1.64633	-0.667932	-0.572104	0.925119	-2.3584
b0902	pflA pyruvate formate-lyase activating enzyme	-0.0907217	0.556843	-2.7876	0.138584	-0.65296	-0.623343	-3.80082	-0.256114	-2.4271	-2.10409	-0.319134	-0.805029	-0.654587	-1.38884	-1.21964	-0.423013	1.01685	0.946527	1.20639	0.00923275	-0.0320899	0.532717	-0.866749	-1.14565	-1.7403	-0.800602	-0.200326	0.643503	-0.490995	-0.464596	-3.59641	-2.71893	-0.834042	0.285666	-0.922444	0.790039	-3.96538	-0.0507887	-1.78285	-0.806697	-3.03373	-2.61452	-1.51377	-0.799569
b0903	pflB pyruvate formate-lyase (inactive)	-0.193458	0.478768	-4.34618	LQ	-1.54266	-2.0161	0.454232	LQ	-3.11848	-2.95009	0.290422	-1.03824	-2.33267	0.014166	-0.0363699	-1.05531	-2.15302	-1.99429	-0.398267	0.235649	-2.1635	0.399325	0.84083	-0.125373	-0.55325	0.428331	0.334357	-0.296309	-0.0826197	-0.194477	-1.37657	-0.881839	-0.341114	-0.0325043	0.0780972	0.900341	-3.62187	-1.61732	1.37741	2.32592	-2.89256	-1.00242	-1.7863	-0.631617
b0904	focA FocA formate FNT transporter	1.17882	0.474208	-4.59314	-2.21994	-1.34698	-1.18111	-3.92353	-2.6528	-4.17304	-4.20389	-0.807263	-3.02421	-1.47081	0.575929	0.211506	-0.333846	0.0176163	-0.603789	0.452629	-0.747483	-2.40657	-2.89408	-1.47851	1.21108	-2.25451	0.230611	0.338274	-1.12585	1.33574	-0.215293	1.0057	0.10153	-0.727364	-0.859061	-2.90597	0.589513	1.10894	-3.60955	-0.638049	-1.59506	-0.524422	-0.144759	1.84409	-1.78879
b0905	ycaO conserved hypothetical protein	0.617131	0.589025	0.0800337	-0.0897273	-0.307607	0.207042	-0.705523	-0.661812	-1.70763	-3.22046	-0.410068	-0.569381	-1.50414	-0.360699	-0.519791	0.309077	0.35593	0.198696	-1.48864	-1.73657	-1.1701	-0.350428	0.172896	1.10555	1.14438	-0.25699	-0.0382333	0.44484	-2.09799	-0.832508	-2.67527	-2.35236	-0.80913	0.193954	-1.67455	1.22375	0.0209875	0.318585	0.94615	-0.58927	-0.470738	-0.16549	0.254775	-0.00239831
b0906	ycaP conserved hypothetical protein	-0.0863754	1.2711	0.844917	0.777398	-0.495929	0.451989	-0.51726	-0.101951	0.329078	-0.210021	-0.141879	-0.837037	-0.0124947	0.242744	0.121333	0.752603	-1.19145	-1.08549	-0.392562	0.621504	-0.436059	-0.880993	0.473736	0.533888	0.355122	0.0526054	-0.107661	-0.195566	-0.473979	0.631198	-0.622941	-0.559114	0.00270839	-1.01931	-0.386994	-0.246965	-1.10254	0.144289	0.216294	-0.317426	1.26417	0.683783	-0.252492	0.0806713
b0907	serC phosphohydroxythreonine aminotransferase / 3-phosphoserine aminotransferase	-1.8784	0.357115	-0.10945	0.203998	-0.922091	1.22622	5.50433	4.61592	0.798441	1.14973	-0.00419569	1.90789	-1.88104	0.509005	0.63345	-1.54285	-0.690909	-0.0699186	2.09284	-0.405699	-2.84758	0.49421	1.14676	-0.830703	1.63366	0.031318	0.9864	0.505366	2.34032	2.23941	-2.19898	-1.34659	-1.10052	-0.617426	-2.98503	0.334983	-1.20356	3.40816	-1.00606	0.728747	-0.104681	-0.782509	-0.960795	3.39894
b0908	aroA 3-phosphoshikimate-1-carboxyvinyltransferase	-1.95251	0.375527	1.0762	-0.0293597	2.16894	2.41641	-0.647799	3.21873	2.61131	3.05952	-0.386629	3.68057	-0.159519	0.934993	0.846614	-0.56098	5.35406	5.12125	3.95654	7.26412	7.07957	4.36521	3.03616	2.97932	0.66732	-0.211807	0.444423	0.948487	1.81797	1.69503	-2.22814	-2.36661	-1.41785	0.192972	-3.20974	-0.245274	-0.895481	3.05205	-0.306358	1.24261	-0.41462	1.16715	0.20648	7.70056
b0909	ycaL putative heat shock protein	-0.172665	0.53349	-0.427161	-2.31611	-0.531742	-0.813415	-2.96446	0.905369	-1.93406	-0.0740731	0.544468	2.96818	-1.02055	0.335294	-0.167899	-0.203483	-0.457808	-0.473775	-0.75439	5.37019	-2.26782	-2.1221	0.510737	0.996932	1.0082	-0.423307	-0.677433	-0.0634101	1.79175	-1.17712	-3.76373	-4.33178	1.10064	-0.128733	-0.929957	-0.798799	2.11708	-0.373718	-0.595237	-1.15739	2.2413	-1.73637	2.81321	-2.40583
b0910	cmk cytidylate kinase	-2.40798	0.36289	-0.0314448	-1.16927	0.304519	0.689121	0.498195	1.79497	2.2717	1.00384	0.943741	2.44081	0.452034	2.80899	2.51988	0.0587848	-0.791981	-0.160212	0.470951	0.387046	-0.982146	-1.79995	0.802071	1.17442	1.60554	-0.15453	0.745491	0.985993	1.98783	0.846381	-3.13522	-2.42107	0.537391	4.80449	-1.06169	0.544583	-0.936254	1.7995	-1.41703	0.321289	-0.016336	1.02989	1.54075	0.230399
b0911	rpsA 30S ribosomal subunit protein S1	-2.07289	0.380337	-3.42854	0.14677	-2.38336	1.15734	-2.33206	0.973521	-3.29934	1.207	-1.77319	1.76664	-2.47689	1.5299	1.10901	-3.47576	-0.0540121	0.0601271	1.28363	-1.02021	-3.76899	-0.520379	1.47181	-0.659281	1.27211	1.12816	0.75847	-1.4709	1.43671	1.92456	-1.3812	-2.6977	0.550411	0.741203	-4.20905	0.192751	-0.326869	2.07459	0.0886414	1.54789	-0.483756	-2.82415	0.222824	-1.55263
b0912	ihfB IHF transcriptional dual regulator	-0.822072	0.321059	-1.18084	0.269048	-1.42939	1.04513	-0.641868	1.69446	-1.51546	1.45791	0.30595	2.22622	-0.0818668	0.440218	1.15162	-1.253	-0.601661	0.588719	1.77603	-1.74926	-1.20234	-0.729817	0.75649	-0.294698	1.0989	-0.668948	0.114538	-1.37381	1.374	1.65179	-3.70824	-2.49219	0.202874	1.29496	-1.65264	0.399119	4.25951	2.493	-0.659212	2.12114	-1.73442	-0.761616	-1.10766	-0.851577
b0913	ycaI putative recombination protein with a metallo-hydrolase domain	0.451773	0.668243	0.264394	-1.25928	LQ	-0.356684	-3.90702	-0.367669	LQ	-2.14297	-0.305469	-0.659036	-0.421604	-0.171037	-0.458902	-0.159621	-0.672042	-0.595015	0.966805	-0.369181	0.339549	-0.0450214	-0.0024411	-0.284438	-0.00711502	-0.457174	-0.447463	-0.335723	-2.42279	0.371471	-4.08049	-4.13268	-0.222845	-0.283774	LQ	0.152812	-2.22511	-0.89128	0.781226	0.0185616	1.33777	-0.200599	-2.12101	-0.324921
b0914	msbA ATP-binding transport protein	-2.56255	0.553095	-0.872742	0.703726	-0.867164	0.46905	0.0242883	2.46487	-0.828124	0.195446	0.180437	1.09456	-0.848053	0.80991	0.519252	-0.499521	0.0263063	-0.107885	0.17573	-1.57481	-1.76701	-1.28061	0.870811	-0.853372	0.815217	2.1173	2.37516	-0.872957	0.617542	0.951129	-1.52691	-2.11325	-0.919791	-0.765163	-1.03112	-0.37154	-1.66507	1.25269	-1.25816	0.791596	5.36925	-0.902766	0.810774	-0.474391
b0915	lpxK tetraacyldisaccharide 4'-kinase	-2.2849	0.641508	1.12577	-0.759718	-0.884891	0.11173	4.45316	-0.422766	-0.986072	0.777028	0.989771	1.30671	0.492792	1.19116	1.35014	0.728379	-0.308333	0.0963013	0.649709	-1.0509	-1.3667	1.07149	0.886047	-0.680259	1.47066	1.38487	1.9854	-0.122192	1.31876	1.15965	-1.50275	-1.2727	-0.780128	-0.269993	-2.14141	-0.151265	-1.54018	2.33931	-0.240527	1.08343	-0.156684	0.805032	0.140435	0.106131
b0916	ycaQ conserved protein	-0.847831	1.15416	0.604922	-0.823147	0.0983985	0.464906	-0.84132	0.350703	0.349077	0.625378	-0.124492	1.9515	1.01144	0.558865	0.475454	0.230014	1.01606	0.778757	-0.412958	0.137328	-1.05347	-0.127293	0.684642	1.1759	-0.23095	0.344832	0.396114	1.57023	1.58417	1.61337	-0.70823	-0.859698	0.0222281	-0.308187	0.786765	0.667465	-0.853153	0.497899	-0.438682	0.763694	-1.46355	-1.15237	0.655045	1.46142
b0917	ycaR conserved protein	-0.321101	0.576367	-0.631512	LQ	-0.48293	LQ	-0.43477	LQ	0.150863	0.264212	-0.51271	1.12506	-0.581629	-0.148419	LQ	-0.395456	-0.384784	LQ	0.488078	-0.803023	-0.711631	-0.200217	0.604653	-0.323776	0.485135	0.833197	0.667487	-0.456081	1.04436	0.790897	-1.13118	-0.979714	-0.579897	-0.334902	-0.757943	-0.143776	-1.01501	1.19233	-0.655175	0.997523	-0.942358	-0.615328	0.909448	0.168533
b0918	kdsB 3-deoxy-D-manno-octulosonate cytidylyltransferase	-0.677173	0.527138	-1.67309	0.741277	-0.166106	-1.02418	-1.15791	1.07913	-0.300425	-0.164524	-1.36144	-0.463646	-0.829739	-0.570665	-0.869321	-0.882126	-1.71679	-1.94565	-0.763492	-2.24997	-1.90932	-1.52093	-0.113342	-1.42827	-0.136951	0.0575181	0.00371075	-1.10142	-0.449961	0.918094	-2.54691	-2.37947	0.597636	-0.993191	1.06332	0.481822	-2.11437	0.0805443	-2.10743	-0.202438	-1.87379	-1.30822	-0.557233	-1.11651
b0919	ycbJ conserved hypothetical protein	-0.630021	0.755131	0.947552	-0.37462	0.337266	0.515003	1.1163	0.552739	0.6193	0.722223	-0.0128556	0.198035	1.04767	1.91888	1.63001	0.678576	0.314151	0.386936	0.698051	0.00477781	0.9532	0.344207	1.23905	-0.391119	0.943061	1.15417	1.22416	0.203038	0.312144	1.68587	0.342465	0.800339	0.0731961	1.55428	-0.238188	0.654781	0.482254	0.917933	-0.999353	1.40055	-1.24545	1.60453	0.917828	0.482387
b0920	ycbC conserved inner membrane protein	-1.2536	0.676269	1.67146	0.469312	LQ	0.509354	2.03046	-0.075351	LQ	1.00659	-1.10482	-0.612215	2.04532	0.609659	0.975971	-1.4645	-1.23704	-0.703653	3.61457	-0.484305	0.197046	0.556306	1.24542	0.000169338	0.83276	1.29118	1.41717	-0.163014	0.624416	1.76619	-1.67136	-1.31656	LQ	1.90188	LQ	0.598329	0.430181	0.653739	3.19108	1.08549	-1.81161	2.37381	-1.23241	4.12787
b0921	smtA predicted S-adenosylmethionine-dependent methyltransferase	-0.774149	1.11198	0.567986	-0.992735	-0.74141	-0.480313	-1.0621	-0.926437	-0.65853	-0.501865	-0.568538	-0.709121	0.0884278	-0.193162	-0.0403474	-0.956282	-1.1843	-0.835567	-0.328819	-0.852274	-0.824124	-0.859585	-0.411445	1.34419	0.218404	-0.459607	-0.527332	-0.821406	0.100746	-0.531533	0.818453	1.09165	-0.870553	-0.128891	0.0835545	-0.418298	-0.694555	0.430421	-1.42004	-0.636166	-1.09428	-0.513581	-1.16435	-1.04046
b0922	mukF Ca 2+-binding protein involved in chromosome partitioning	-1.74681	0.515784	-0.161377	-0.0231349	-1.05826	0.475146	-1.71501	0.23486	-1.86834	1.18876	-0.865955	1.37394	-0.290854	0.965285	0.875167	-1.93735	1.34815	0.876633	1.09061	-1.40388	-3.11337	-1.06713	1.16452	2.31901	1.28828	1.99263	1.29746	-2.42603	1.64232	1.48349	-0.183401	-1.10138	-1.1342	1.36752	-2.86535	0.111387	-1.28488	1.87674	-1.24823	1.37429	-1.14091	-1.97381	0.432329	-1.28781
b0923	mukE protein involved in chromosome partitioning	-1.64944	0.458777	-1.01069	0.73882	-0.894754	0.584923	-1.21157	0.830057	-1.13598	1.46099	0.711778	1.47796	-0.808253	0.293093	0.92081	-0.806908	-0.727302	0.422168	0.746768	-0.513505	-1.76545	-0.360095	1.26991	-0.116111	0.682966	-0.401457	0.659426	-0.499127	1.43869	1.54845	-0.996772	-0.167459	-1.86002	-0.296788	-2.69304	-0.386858	-0.513427	2.4653	-0.338665	1.10081	-0.666479	-0.332744	0.172851	-0.912223
b0924	mukB cell division protein involved in chromosome partitioning	-2.03796	0.402094	0.393907	0.522828	0.54502	1.09961	0.217492	0.994221	1.2413	0.877695	1.01244	1.74506	1.68859	1.68435	2.57369	1.38055	0.55903	1.18411	0.918698	-0.704182	-0.769512	-0.35573	1.02776	2.22705	1.38533	-0.156344	0.180002	0.665888	1.21601	1.70089	-1.92791	-1.27112	0.425134	-0.375303	-0.328114	0.100749	-1.55516	1.7081	-0.682677	-0.110941	-0.883972	0.3512	0.621133	-0.033665
b0925	ycbB predicted carboxypeptidase/amidase	-0.078362	0.970796	0.294133	0.690475	0.638497	0.866276	0.883805	0.360806	-1.40056	-0.705262	1.23354	0.0387871	2.03976	1.55882	1.54054	2.70073	1.31824	1.46878	0.418298	0.692717	-0.77265	-0.807789	0.780305	0.981728	-0.449406	-0.595165	-0.768747	-0.245243	-0.0930004	0.559874	-0.401183	0.0234645	-0.79859	-1.40085	1.28021	0.238223	0.332319	0.739283	0.934502	-0.0679747	-1.30027	1.49482	0.39518	-0.600512
b0926	ycbK conserved protein	-0.846425	0.701212	-0.209838	1.33369	-0.183898	0.718656	-0.449319	1.10728	-0.850309	0.213037	1.07177	0.52122	0.148539	-0.490886	0.252375	0.0252026	1.78993	1.74245	0.379013	-0.681595	-1.61406	-1.33485	1.24675	2.16335	0.0859217	-0.809806	-0.282601	0.847679	0.969508	2.0556	-1.11922	-0.342826	-0.584368	-0.518037	-1.1845	0.0767588	-1.20218	0.884293	1.3524	0.362167	-0.939683	-0.340005	-0.663018	0.375491
b0927	ycbL predicted metal-binding enzyme	-0.21733	1.21063	0.734412	-0.464495	-0.849487	0.25616	-1.08294	-0.375421	-0.459989	-0.427507	-0.0472632	0.366476	-0.157509	-1.06951	-0.710382	-0.764663	-0.639588	-0.523909	-0.597227	-0.451066	-1.59315	-1.49098	-0.237096	-1.14221	0.177315	-0.174297	-0.110058	-0.624325	0.0850495	0.00151648	-0.666714	-0.428161	-0.150865	-0.780849	0.183268	-0.255741	-0.614403	0.0538302	-0.768101	0.192217	-1.73628	-0.77842	-0.670145	-0.23726
b0928	aspC aspartate aminotransferase, PLP-dependent	-0.706363	0.617198	-3.0427	-1.25785	-1.73771	-0.230073	-3.49108	-1.19042	-1.30507	-1.27278	1.9685	3.70839	0.521379	1.05523	0.844599	2.7528	2.74273	2.76612	2.93276	-0.016481	3.67309	0.662315	0.340053	-1.3529	1.59976	-0.615007	-0.545311	1.97139	3.36344	1.48967	1.4419	2.27666	0.0124559	-0.552843	-0.0204812	-0.0775668	-2.39263	1.96407	-1.43563	0.490968	1.51682	-2.08633	1.16262	1.17257
b0929	ompF The Colicin A Import System	-0.187815	0.95009	-1.74302	0.031034	0.0042648	-0.844368	-1.96258	-2.34544	-0.353029	-1.39878	1.92192	2.11859	3.46785	3.31373	3.69754	3.89188	4.25901	4.58468	3.16147	3.46719	2.90191	2.60172	0.316213	-0.0486861	1.33029	1.31839	1.46374	2.38509	1.01703	5.53546	5.38251	6.28328	1.30581	-0.462752	-0.704588	-0.128542	-2.59266	1.0394	2.79899	0.221557	2.98784	0.859501	2.42614	4.72612
b0930	asnS asparaginyl-tRNA synthetase	-1.93707	0.892972	-1.86281	-0.157182	-0.49514	0.0936106	-0.235433	-0.48899	-0.379473	0.852664	-0.560069	0.765496	-0.150889	0.984772	0.965156	-0.350895	0.692445	1.00195	0.350297	-0.602432	-1.18337	-0.668261	0.664073	-0.867813	0.605924	0.532501	0.295617	-0.262833	0.66279	0.919078	3.51065	3.34678	0.252328	-0.689802	-1.75567	-0.210475	0.441896	0.945108	-0.780243	0.739691	-0.657042	0.00128228	0.44409	-0.530811
b0931	pncB nicotinate phosphoribosyltransferase	-1.11027	0.542416	-0.419494	-1.28302	0.116639	-0.0249087	0.747501	-3.04666	0.344704	-1.91696	0.635588	-2.24461	1.58798	-2.27671	-2.2743	0.249529	-1.73782	-1.57068	-1.97038	0.689529	-0.132662	-0.738669	0.898669	-0.198338	0.307905	-0.900342	-1.43863	0.899903	-1.54576	-1.95666	-4.83257	-4.49182	-0.457659	-2.54032	-3.14452	0.823324	-1.65446	-2.04749	1.7167	-1.60806	-4.82241	2.4606	2.08191	-0.107475
b0932	pepN aminopeptidase N	-0.493027	0.584853	-1.41979	-2.03253	-0.295164	-0.115049	-0.600908	-0.473687	-1.48394	-0.962017	-1.04781	0.80062	-0.587138	-0.624215	-1.06971	-2.78222	-0.276737	-0.230654	0.0195813	-2.2823	0.287031	-0.577184	0.492068	-0.447509	0.763345	-0.192489	-0.222248	-0.790168	-0.177182	0.180921	-2.12115	-2.1782	-0.442239	0.296672	-2.78946	0.0616528	0.175269	-0.0674788	-0.0815235	0.0500183	-1.22559	0.675785	0.188017	-0.137877
b0933	ssuB aliphatic sulfonate ABC transporter	-1.14747	0.576308	1.83563	-2.21832	0.93029	0.321598	1.63294	0.107171	-1.0747	-1.47683	-0.37806	2.13254	0.319196	-0.0191843	-0.327393	2.05512	2.24824	3.28413	2.50982	0.440623	-2.00884	0.56149	2.12222	0.823044	1.47772	0.892894	0.291542	0.107528	-0.431492	1.86975	0.855256	0.423663	0.381142	-1.45795	1.64015	-0.253601	0.348686	-0.349235	-3.39758	0.936747	-2.32424	1.61905	-1.96481	0.773484
b0934	ssuC aliphatic sulfonate ABC transporter	-1.05846	0.875217	-1.39474	-0.927728	-0.596342	0.0177033	0.215263	0.059398	-2.52708	-1.08367	0.505844	-0.128043	-0.269305	0.13666	-0.286484	-0.00595477	-0.963907	-0.954223	1.68256	-1.74835	1.21843	0.337913	0.687782	-1.72992	1.78775	-1.01524	-0.872599	-0.920357	-0.847238	-1.25537	-2.55577	-2.5866	0.338207	0.878567	0.772023	0.606527	0.382699	-1.10994	-2.57152	1.38558	-1.75074	2.4499	-2.51166	1.01214
b0935	ssuD alkanesulfonate monooxygenase, FMNH 2 -dependent	-1.49124	0.940373	-0.878993	0.00733131	-0.0466318	0.936363	-0.485306	0.891801	0.125673	-0.147466	1.04709	1.23789	0.892646	-0.0749268	0.411556	0.530672	-0.466111	-0.0634771	2.40207	-0.52847	-0.650052	-0.784513	0.566521	-0.663487	0.97179	-0.0510832	0.256646	-0.174989	0.707019	0.383869	-0.71044	-0.423165	0.370945	-0.0148572	-0.797897	0.0388611	-0.421949	1.37235	-0.877486	0.550718	-0.312853	-0.0158057	-0.587772	0.426011
b0936	ssuA aliphatic sulfonate ABC transporter	-0.0302285	0.53847	-2.17551	-2.31502	-0.687538	-1.40271	-4.11672	-1.80618	-2.97303	-3.44004	-0.0267058	-1.62525	-0.657672	-2.59758	-2.29234	-0.214443	-1.66856	-2.12959	-1.60751	-0.720994	-1.53003	-4.03327	0.867207	0.225884	-0.0870359	-0.430793	-0.210043	-1.45667	0.105389	0.678841	-1.03971	-0.440754	-0.578474	-2.88892	-0.428208	0.88066	-4.1957	0.201483	-3.86869	-1.15862	-0.32687	-1.87199	-3.49657	0.622693
b0937	ssuE NAD(P)H-dependent FMN reductase monomer	0.0496216	0.820805	0.892356	0.629274	-0.516045	-0.390184	-1.62003	0.884459	-1.18754	-1.00421	-0.621863	1.35636	0.121711	-0.90015	-0.668515	-0.607118	-1.49711	-1.17609	-0.757577	0.129972	-2.18419	-1.01607	0.257906	0.952021	0.388601	-0.0068663	0.17712	0.144334	-0.643418	1.72475	-1.70254	-1.00126	-0.299135	0.344049	-1.15754	0.731748	0.00770993	-0.583906	-1.63229	-1.40482	-1.73212	0.612235	-1.25252	0.569395
b0939	ycbR predicted periplasmic pilin chaperone	2.22607	0.544942	-1.71741	-1.97633	-2.36368	-1.43191	-1.8755	-0.290246	-3.74004	-6.96339	-2.64345	0.0942394	-0.744622	-0.957278	-1.18406	-0.694611	-0.0574914	-0.413213	-1.73878	0.408405	-0.822889	-0.437565	-0.461152	-0.791494	-1.1504	0.241367	-0.280094	-0.606283	0.414611	-2.83014	0.379427	-0.376438	-0.712658	-1.66159	-1.45343	-0.298655	-0.953761	-1.57611	-0.187849	-3.12278	-1.62755	-0.0372933	0.665714	-1.25415
b0940	ycbS predicted outer membrane usher protein	1.74604	0.33526	-4.66042	-1.75451	0.295775	-3.00536	-3.71578	-2.79569	-7.19088	-4.96409	-1.17436	-1.11665	-2.38686	-1.72699	-0.955481	-0.779819	-3.94568	-3.73696	-3.18326	0.399191	-1.96974	-0.414184	-2.47556	-0.977763	-2.45365	-1.0991	-0.0974987	0.518547	-3.66809	-1.72206	-2.17642	-1.35218	3.11273	1.10673	3.60816	-1.55023	-1.53567	-2.12245	1.57681	-2.36855	0.652183	-3.11452	0.498622	-5.00805
b0941	ycbT predicted fimbrial-like adhesin protein	0.781245	0.83069	-2.18334	-0.0822231	-0.293214	-0.729875	-2.48602	0.764021	-2.32207	-1.87787	0.150581	-0.568939	-0.215213	0.0416727	0.107872	0.201952	-0.5036	-0.26476	-0.0621654	-1.29713	0.0887032	0.18665	0.34429	0.481784	-0.377612	0.252242	0.249394	0.398851	-0.736213	-0.675383	-1.70437	-1.96103	0.695701	0.638164	1.23596	0.386301	1.48902	-0.471728	-0.858498	0.278795	-2.49692	-0.237314	0.427071	0.0513762
b0942	ycbU predicted fimbrial-like adhesin protein	0.00495498	0.677134	1.69575	0.367547	0.571668	0.685052	3.1882	1.26596	0.661894	-1.21089	0.443026	-0.690193	1.09292	0.328822	0.145864	0.538235	1.22527	0.75765	-0.0148337	-1.88382	2.04684	2.30156	0.771463	0.496898	1.18628	0.230021	0.059568	0.847137	-0.719411	2.25374	-2.86001	-3.11219	0.485475	-1.92696	-0.335135	-0.239062	-0.855886	0.573106	0.0544486	0.686779	0.0545294	1.45546	0.119831	0.535756
b0943	ycbV predicted fimbrial-like adhesin protein	0.200866	0.886166	0.3651	0.430928	0.05924	0.0482049	-1.55462	LQ	-1.5909	-0.320881	-0.62102	-0.532572	0.538266	0.553391	0.454212	-0.708075	0.540302	0.799994	-0.811469	-0.417074	0.662373	0.0123451	0.404603	1.39505	1.05184	0.855175	0.782655	0.850736	-0.0612025	0.605766	-2.62532	-2.74167	1.30562	-1.55049	0.0520666	-0.0542649	2.01714	0.137436	-0.00640218	0.0456567	-2.35269	0.234541	-0.255999	-0.740628
b0944	ycbF predicted periplasmic pilin chaperone	-0.502893	0.523851	-0.606586	-0.323339	0.158838	1.18578	-3.79676	2.26057	-2.75612	-0.710454	-0.248902	-2.16673	-0.152671	1.77987	1.906	0.0456091	-3.02683	-2.6987	0.595302	-0.894066	0.330866	-0.171644	0.543078	-0.369401	0.133298	-0.752602	-0.289284	1.01221	0.840684	0.210335	-5.89072	-4.7913	0.317166	-4.01745	0.291112	-0.706167	-1.59063	-0.515723	-0.0405954	-1.5887	-0.684301	0.410135	0.80485	-1.91688
b0945	pyrD dihydroorotate oxidase	-1.30809	0.260304	3.74218	0.331295	4.84522	5.66943	-6.91966	0.796211	0.0706591	-1.33941	1.01785	0.960549	-2.50567	0.36288	1.15702	-3.79007	-4.38512	-3.4775	-0.029762	3.86613	1.67364	-2.44025	0.276856	3.54743	-1.43351	2.49353	2.80904	2.86723	0.720619	0.00254882	-7.4209	-6.70043	-0.303207	-4.05959	2.53089	4.76382	-4.29851	2.43567	-2.893	-1.40097	-3.15722	-3.88075	-2.04694	-4.76143
b0946	ycbW predicted protein	0.179964	0.765117	-1.8969	-1.75764	-0.626675	-1.06441	-2.91737	-0.908282	-1.3571	-1.99147	0.250921	0.490192	0.0341328	0.210157	-0.101745	-1.2771	-0.847397	-0.456987	-0.991094	-1.34731	-1.17637	1.40414	-0.125908	-0.135311	1.1345	-0.576699	-0.420469	-0.836556	0.429725	0.907016	-2.61576	-2.14505	0.193888	-1.128	-1.32998	0.115201	-0.524994	-0.876464	0.457671	0.57245	-1.26677	-0.902581	-1.00503	-2.61579
b0947	ycbX predicted 2Fe-2S cluster-containing protein	-0.582169	0.723641	0.264545	-1.51043	0.0305802	-0.449916	-0.941857	-1.71603	-0.541401	-1.81158	0.0703748	1.29413	0.848322	0.770206	0.559159	0.241363	1.62967	2.05796	-0.4554	-0.941437	0.778461	-1.03401	-0.0308741	1.37678	-0.768105	1.25363	1.22262	-0.294792	0.799781	-0.277122	0.687573	1.01082	0.856631	0.0420529	-1.03659	1.50654	-2.53327	1.17207	0.0300658	0.708788	-2.23868	-0.874239	-1.02563	-0.365135
b0948	rlmL 23S rRNA m 2G2445 methyltransferase	-0.244289	0.358851	-4.5799	-0.943383	-0.251923	-3.46862	2.12082	-1.37929	-5.27347	-4.2671	0.629313	2.54742	-0.918727	-0.239337	-0.552302	-0.499918	-3.08314	-2.3215	-1.36594	-6.20232	-0.891953	-2.70838	0.12376	-0.947157	1.64803	0.464566	0.663316	-0.489262	0.22082	-2.24328	0.447974	0.870924	1.16529	-0.49882	-0.762637	-0.257204	-7.82505	-2.10048	-1.63559	-1.1506	-6.83057	-0.419816	1.22652	-2.09055
b0949	uup ATP-binding protein with possible role in replication	-0.873035	0.766811	-0.198499	-0.276973	0.288525	-0.872	1.3222	0.883586	-1.79564	-0.0543637	0.421915	0.804534	-0.26358	0.524628	0.2144	-1.2822	-0.107502	0.0171945	0.090011	-0.744084	-2.90496	-1.92748	0.418061	-1.09239	0.327613	0.403264	-0.00328766	0.163496	0.101419	-0.521252	-1.30069	-1.54367	1.14109	0.674468	0.0471585	-0.823332	-2.42822	-0.975089	-0.913538	-0.630829	-2.47275	0.841748	0.696342	-1.86505
b0950	pqiA paraquat-inducible protein A	-1.02403	0.815735	1.83934	0.71847	0.00275603	-0.00392867	-2.01115	0.844092	-1.22248	-1.4315	-0.242231	-1.75411	1.02669	-0.0673542	-0.251937	0.353644	-2.47181	-2.72475	-0.491984	-0.437719	-0.51288	0.724281	1.99964	-0.232126	-1.14309	-1.31875	-1.34103	0.562966	0.329176	0.482053	2.10485	2.47556	0.87427	1.0735	-1.12879	1.33592	-1.09173	1.15977	-2.2928	2.28009	-0.74625	-0.65522	-1.0674	-2.24233
b0951	pqiB paraquat-inducible protein B	-0.91582	0.785348	-0.0677654	-0.239785	0.677302	0.172873	-0.675379	-0.736458	-0.367729	-1.05536	0.800374	0.618749	-0.138185	0.54363	0.411849	0.406004	-1.56547	-1.30455	-0.933794	0.280451	-0.989545	-0.445045	0.625571	0.338814	-0.65809	-0.543733	-0.822712	0.7721	1.6821	0.83415	0.867521	-0.0130984	0.377748	0.662151	-1.10331	0.911007	-0.0787285	-0.338953	-2.12808	-0.29864	-0.972101	0.0798513	-1.19444	0.309107
b0952	ymbA conserved protein	-0.206904	1.09007	0.810315	-1.23501	-0.261589	0.0196716	-0.0355839	0.485632	1.1631	-0.822683	-0.969595	-0.473592	0.101503	-0.600146	-0.724444	0.172998	-1.56934	-1.48823	-0.450515	-1.40914	1.95887	-0.099997	-0.0594914	-0.432136	-0.839288	-0.942531	-0.933038	-0.023298	1.39322	1.78121	-0.723802	-0.779342	0.586989	0.412156	-0.489318	-0.853277	-1.68483	-0.253782	-0.49028	-0.649607	-1.27185	1.18098	-1.60081	-1.11632
b0953	rmf ribosome modulation factor	-0.402367	0.390769	-2.32189	0.457619	-1.15545	0.759665	-1.21657	LQ	-0.354302	0.84251	0.398225	1.45457	-1.27506	-0.0545532	0.372018	-1.98604	0.0718222	0.0471438	1.17689	-0.868926	-1.60714	-0.373652	1.19092	-0.118436	0.933217	0.103027	0.380225	-1.84495	1.24567	1.67777	-0.497945	-0.341655	-1.33241	-0.11253	1.71128	0.233558	-0.770616	2.27711	-0.593052	1.14766	-1.04461	-1.45901	-0.632258	-0.673514
b0954	fabA beta;-hydroxyacyl-ACP dehydrase [multifunctional]	-2.00495	0.824157	-0.495675	-0.280499	0.984637	0.519328	-0.603611	0.158338	0.445405	0.254295	0.83802	0.214836	-0.203222	-0.39903	-0.397398	-0.388056	-0.728425	-1.00924	0.73851	-1.27075	2.19961	-0.550509	0.639063	-0.624561	0.864935	1.41729	1.38099	0.684645	0.211705	0.844266	-0.849987	-0.590112	0.204163	0.434685	1.51085	0.827778	-0.849272	0.740935	-0.986323	-0.246761	-1.24553	0.54734	-0.749656	1.15049
b0955	ycbZ putative ATP-dependent protease	-1.06695	0.965402	0.154705	0.0376966	-0.104594	0.968225	-1.76763	0.389761	1.12816	0.829646	-1.30221	-0.764459	-1.30868	-0.906273	-1.24944	-0.872186	-1.6891	-2.09883	0.617228	-1.00791	2.55052	-1.0716	0.144766	-0.313599	1.54383	1.16578	1.25836	0.319699	0.685595	0.613746	-2.07509	-2.0179	-0.909155	1.89311	-0.87639	-0.90596	-0.186653	0.699158	0.174443	-0.613423	-2.2164	1.47902	0.431577	-0.311353
b0957	ompA outer membrane protein 3a (II*;G;d)	-1.7051	0.46078	-0.323593	-0.144915	-0.782162	-0.101066	-0.477379	-0.307807	-1.22332	0.325581	-0.294697	0.938444	-0.133288	0.215675	0.0697621	0.0864251	-1.19761	-0.794802	0.695656	-1.68104	-1.51063	-1.32681	1.03972	-0.116835	0.817912	-0.097615	-0.108828	-0.559108	0.799884	1.09008	-1.4393	-2.54857	-0.636546	0.599478	-2.18753	-0.5305	-2.39131	1.69874	-2.33493	0.728666	-2.40117	-0.711509	-0.291191	-0.0726901
b0958	sulA SOS cell division inhibitor	-0.796677	2.25017	-0.0553454	-0.572117	0.196861	LQ	-0.162903	LQ	0.100629	-0.0328157	0.155976	-1.56666	-0.0159589	0.4487	-0.0236298	0.116865	-1.56237	-0.860016	0.390464	1.28173	0.0868969	1.23578	-0.145616	1.08764	0.30354	-0.0834948	-0.0677616	0.340868	-0.239765	-0.304049	-1.56666	-1.18309	0.257949	0.10844	0.411728	0.396789	1.15863	0.260855	-0.513759	-1.37337	-1.56666	-0.356883	0.178491	1.22856
b0959	sxy transcriptional coactivator for CRP	-0.284526	0.645665	-0.373441	-0.544362	-0.232512	1.07041	-2.72708	0.848741	0.883716	-0.373986	-1.22495	-0.893585	0.307047	-0.216611	-0.338529	0.0965927	-1.19041	-1.14856	-1.12755	-0.463408	-1.45917	1.98922	0.275551	-0.587027	-0.56364	1.22236	1.09576	-0.219236	-0.909152	0.875746	0.154717	0.867476	0.987803	1.28318	0.0535167	0.814267	-1.06692	1.49102	-1.56914	-1.17331	0.851217	-0.204842	2.39746	-0.39109
b0960	yccS hypothetical protein	0.346484	0.570181	0.0155774	-2.60771	0.00963231	-0.795018	-5.05494	0.0323711	-4.32906	-1.6895	-1.46212	0.032073	-2.1315	-0.900139	-0.955602	-0.955971	-1.98414	-1.74906	-2.89617	-4.59738	1.05176	-0.322485	-0.0761335	-0.810595	0.556693	0.785779	0.771475	-1.02266	1.2645	0.275648	-2.08751	-1.6705	0.197204	0.583834	0.306792	0.621397	-0.210172	0.9516	-0.737989	0.243028	-4.32371	0.961125	-0.121668	0.388855
b0961	yccF conserved hypothetical protein	0.218077	0.933317	-1.19426	-0.472844	-0.1427	0.166983	-1.67745	-1.10561	-0.576989	-1.60892	-0.0579271	-0.265624	0.681151	0.601909	0.250718	-0.419027	-1.45208	-1.42368	-0.349463	-0.650631	1.03769	0.558178	0.216901	1.30492	0.179935	-0.149916	-0.235382	0.683551	1.88468	0.55106	1.1101	1.11636	0.146727	-1.02429	-0.64883	0.670325	-1.94593	-0.586858	1.03243	0.031218	0.989287	-0.291957	-0.80734	1.44634
b0962	helD DNA helicase IV	-0.433897	0.540004	0.86499	-1.43915	0.31839	0.682507	-1.74597	0.261759	-0.715977	-0.589441	0.325959	1.11744	1.50299	-0.182432	-0.113102	1.78742	0.0412824	0.464315	1.13012	0.993189	-1.50964	-2.22771	-0.0119902	-0.63684	-0.907083	-1.24438	-0.95924	1.07737	-1.01969	0.831836	-2.62935	-2.11396	0.508302	1.14557	-1.13178	-0.182528	1.1808	-1.5243	-0.569119	0.536507	-4.16857	-2.13522	-2.35455	1.38143
b0963	mgsA methylglyoxal synthase	-0.37359	0.776034	-0.113625	-0.174486	-0.517977	0.251382	-1.63365	0.292923	-0.45716	1.38391	0.208035	3.09796	0.704738	0.788611	0.793624	-0.299598	-0.464212	-0.355935	1.29586	-1.06025	-2.15171	-0.0292691	1.18048	-0.0693125	0.996415	0.486123	0.735123	0.769137	0.0395749	1.22842	-2.38952	-1.98351	0.0469217	-0.744899	-0.579564	0.740069	-0.867637	0.222562	1.40448	0.139979	-2.15963	3.02509	-0.524438	0.629287
b0964	yccT conserved protein	-0.0294246	0.666994	0.467044	-1.41501	0.207354	0.354037	-0.262057	1.3421	-0.875361	0.553617	0.545173	1.10139	0.68483	-0.0334596	0.0957311	0.0952291	1.44364	1.6966	0.0460183	-0.00657644	-2.40853	-0.616865	-0.152759	-0.289069	0.219665	-0.27837	0.00818265	-0.897002	-1.7226	0.995913	-3.15365	-2.90735	-0.0323292	0.414264	0.823531	0.348855	0.673373	-0.330164	-0.904385	-0.187296	-1.25978	0.116089	-0.857965	-0.652845
b0965	yccU predicted CoA-binding protein with NAD(P)-binding Rossmann-fold domain	-0.0458443	1.06383	0.360619	-0.2941	-0.214384	0.318687	0.272119	-0.101334	0.475768	-0.617589	0.646609	0.46654	0.788414	0.464362	0.278277	0.986985	1.21852	0.961621	0.158632	-1.34433	0.553753	1.17335	0.368552	-0.305	0.221512	0.0942596	0.0828467	0.282672	-1.05175	0.838616	-2.01488	-1.67033	-0.4652	-0.251795	-1.20698	0.457405	-0.910071	0.895365	-0.509533	-0.0885612	-1.43488	1.26456	-0.313593	1.09478
b0966	hspQ heat shock protein, hemimethylated DNA-binding protein	-0.698815	0.559556	0.970913	1.7731	-0.93476	1.37065	-1.01595	0.61429	-0.0585522	3.01557	0.522265	0.236099	0.760345	1.88573	2.00027	-0.252354	-1.03886	-0.0541939	-0.33201	5.47573	-0.429978	-0.48813	1.17883	1.54424	0.747721	-1.11208	-0.372762	0.0564975	-0.0226198	1.26266	-2.32777	-1.39996	-1.59693	1.74673	-1.32343	0.249864	-0.44006	1.37068	-1.42956	1.78979	-1.6319	0.495402	-0.864849	0.947942
b0967	yccW predicted methyltransferase	-0.808449	1.00203	-0.000655066	-0.417266	0.67236	1.10125	0.253844	-0.0763667	-0.170232	0.348508	0.396486	-0.703859	0.168079	0.162491	0.33804	0.548231	-1.06699	-0.752269	-0.32876	-1.19633	1.13009	1.59879	0.863488	0.47777	0.582314	0.00422679	0.349304	0.221479	-0.383941	0.874121	-0.471117	-0.207812	-0.160416	0.36927	0.66033	0.82846	-0.764189	1.11783	0.863385	0.600348	-1.10912	1.22521	-1.14568	0.922084
b0968	yccX acylphosphatase	0.334976	0.936615	-0.734039	-0.602013	-1.14472	-0.480856	0.710402	-0.541571	-0.284602	-0.142697	-1.24541	-0.614959	-0.645676	-0.927863	-0.767315	0.277807	-1.63116	-1.13468	-0.886657	-1.81501	-1.88242	-1.38252	-0.176726	-1.14571	-0.945112	-1.47527	-1.18666	-0.984551	-0.610741	0.202912	-1.64177	-1.44135	-0.815978	-1.38883	-2.15369	0.254949	-0.544969	0.140399	-1.24579	-0.156202	-1.96382	-0.123134	0.598006	-0.662775
b0969	tusE sulfur transfer protein	-0.238325	0.730889	1.14559	-0.91862	-0.254525	0.454595	-1.23052	0.683587	0.00463802	1.3285	-0.00455338	0.091201	0.0770698	-0.810874	-0.527396	-0.189213	0.619576	0.165699	0.946378	-0.729505	-1.42242	-0.399213	0.484823	0.145991	-0.90392	-0.960256	-0.704957	-0.572583	-0.538235	0.246121	-1.79711	-1.54636	-0.589087	-1.27014	-0.0481186	0.968838	-1.39007	-0.142294	0.416956	-0.333716	-1.86049	-0.322838	-1.45026	1.376
b0970	yccA putative carrier/transport protein; substrate or modulator of FtsH-mediated proteolysis	0.11743	1.29444	-1.34346	-1.9153	-1.15952	-0.199041	-1.51944	-0.728627	-1.41579	-1.38805	0.157149	0.740391	-0.163433	-0.200374	-0.208032	-0.679274	-0.84431	-1.00149	0.148117	0.0493852	-0.479977	1.26211	0.300488	-0.080703	-0.94611	-0.322152	-0.479127	-0.338466	-0.964054	0.212965	0.856331	0.63529	0.109342	-0.894419	0.0879076	1.17402	-1.61133	-1.31315	-1.47996	0.992176	-2.50487	-0.30689	-1.73206	-0.273506
b0972	hyaA hydrogenase 1, small subunit	-1.1007	0.706067	1.06866	0.31349	0.68701	0.937448	0.688751	0.301096	-0.769128	-0.195634	0.291531	-0.0684732	0.595058	1.22902	1.32359	1.50829	0.564467	0.843694	-0.400091	3.37022	-3.34972	-2.96476	1.11083	-0.245724	0.351027	0.781521	0.968477	0.48385	1.49208	1.41853	-2.85808	-2.3933	-0.42576	-0.542482	0.53387	0.0425583	1.94991	-0.332636	1.04335	0.818621	-2.85229	1.51142	0.30084	-0.847078
b0973	hyaB hydrogenase 1, large subunit	-0.432566	0.595653	0.898127	-2.21148	0.346769	-0.770427	-2.61684	-0.981877	-2.31942	0.471828	0.946451	1.95078	0.243581	0.767965	0.602233	0.0309928	-3.22578	-3.27852	0.114991	-3.20826	-0.761467	-1.1118	0.102039	0.859742	1.14495	-0.00969323	0.0556508	-1.03328	-0.567698	-0.656529	-0.474155	-0.937284	0.827689	-0.954062	1.06367	-0.827725	-0.885023	0.230379	-1.19802	0.540272	-3.2436	-1.50871	-1.6441	-3.67322
b0974	hyaC hydrogenase 1, b-type cytochrome subunit	-0.00499316	0.827613	-1.01213	-1.47193	0.538163	-0.33093	-2.24104	-0.709295	-1.73436	0.309417	0.163533	-1.29178	0.227927	-0.218044	-0.0658968	-1.07827	-2.62985	-2.71469	-0.771837	-2.64162	-1.71758	-2.80883	1.44143	0.484101	0.742299	-0.444203	-0.255323	-1.01834	-0.457913	0.150899	-3.91363	-3.14561	0.523464	-0.209514	0.896068	-0.414259	-2.387	1.22072	1.26567	1.2289	2.83984	-0.721492	1.71113	1.09779
b0975	hyaD protein involved in processing of HyaA and HyaB proteins	-0.710759	0.62761	0.625823	-0.830513	0.788136	0.598946	0.372737	-0.826767	-2.22411	1.61873	0.984602	0.0332825	0.224832	1.48311	1.32675	0.328749	-2.65362	-1.9011	-0.0510977	-2.29234	-3.16052	-3.0734	0.391111	-0.443358	0.992052	0.0508385	0.494554	-0.0704219	-0.311335	1.82419	-3.66715	-3.53749	0.483905	1.97229	-0.265539	-0.967574	-3.11646	-0.0171327	1.69573	0.318594	2.59567	-0.645509	0.252749	-0.572081
b0976	hyaE protein involved in processing of HyaA and HyaB proteins	-0.615862	0.671519	2.32067	1.05367	0.122515	0.132649	-1.50248	2.90413e-05	-0.73004	0.687854	1.10734	1.18348	0.753304	0.347964	0.629388	0.457322	-1.56485	-1.00385	2.1739	-0.96801	-1.33611	-1.58175	0.484976	1.00554	0.776975	0.724591	1.11176	0.180825	1.30661	0.204792	-2.36703	-2.17294	-0.554757	0.61791	1.52291	-0.567133	-1.06675	0.999713	1.05843	1.2159	-0.345383	2.23362	-1.32946	-1.46585
b0977	hyaF protein involved in nickel incorporation into hydrogenase 1 proteins	0.271982	0.907362	0.349055	0.72636	0.0912726	-0.153722	-2.64311	-1.91302	-0.984085	-0.470598	0.486736	-0.0175916	0.739354	LQ	-0.174317	-0.592101	0.0547966	0.0383686	0.252362	-3.00355	-0.441177	-0.590602	0.291816	0.431568	1.24393	0.235838	0.291945	0.138675	1.20278	-1.456	-4.0114	-3.8024	0.347631	1.49539	0.516249	0.0990721	-3.88999	-0.667956	1.37172	0.292364	2.40873	0.218167	-1.72569	-2.66134
b0978	appC cytochrome bd-II terminal oxidase subunit I	-0.627018	1.21383	1.22949	-1.04155	0.425396	0.706754	-1.0898	-0.376021	-0.0307902	0.44449	0.18384	-0.000450088	0.80255	0.199489	0.252872	0.27858	-0.0197854	-0.0788232	0.0597831	1.32	0.0154626	-0.883402	1.22263	0.400129	0.28729	0.0877151	0.142588	-0.0667542	-0.081558	-0.512781	-1.10179	-1.08531	-0.686119	0.338946	-0.874796	0.584763	-2.21337	0.383101	-0.978853	0.78888	-1.75122	0.560172	-1.09277	0.191593
b0979	appB cytochrome bd-II terminal oxidase subunit II	-0.197056	1.30393	-0.435278	-0.953243	0.174071	0.640194	0.767265	0.49928	-0.15936	-0.083208	0.152249	0.0726503	0.552619	0.559761	0.588621	-0.32221	-0.962743	-0.853082	1.01452	1.56838	-2.32849	-0.775273	0.479032	0.228595	-0.0877452	0.804837	0.77487	0.376615	0.825361	-0.0471695	-0.508494	-0.559884	0.0793906	-0.00707258	-0.743346	0.503136	-0.730271	0.289697	0.864734	0.499778	-1.89196	0.64849	0.227435	0.00274087
b0980	appA acid phosphatase	-0.839701	0.897611	1.10345	-0.857776	0.473145	0.750826	0.434633	0.255389	-0.215818	0.900949	0.45008	-0.0580364	1.09494	-0.239396	-0.0796907	-0.39805	0.22747	0.879535	-0.212098	1.36964	-2.41112	-1.24604	0.847887	-0.210194	0.018878	0.190561	0.190996	-0.267522	0.241004	0.22131	-0.675924	-0.584513	0.245265	0.916947	0.0973168	0.741106	-1.65158	0.422646	1.81564	0.735821	1.18112	-0.423022	-0.456915	-0.665958
b0981	etk autophosphorylating protein tyrosine kinase	-0.0704695	0.328723	-2.35061	0.0748954	0.522901	0.023109	-5.66583	0.889637	-2.35762	-0.369612	1.61614	3.86287	1.04961	0.792767	0.133773	0.231503	-0.65194	-1.55921	-0.674396	-4.7202	-1.85255	-2.94021	0.519919	0.854983	2.29764	2.26187	2.19678	-0.724437	-1.4045	-1.63457	4.46034	4.15691	1.29502	1.81212	0.333278	0.474301	-4.3165	-1.22614	3.15462	-0.961744	-6.9144	0.498871	-0.975685	-5.52287
b0982	etp phosphotyrosine-protein phosphatase	-0.406694	0.926058	-0.656133	1.78771	0.2828	0.662039	-0.980067	0.658185	1.25635	0.0641675	0.502014	0.4358	0.826504	0.546947	0.407291	1.22495	-1.07935	-0.722205	-0.0469693	-1.00764	2.30425	0.410029	0.83834	-0.108473	0.916903	0.143004	0.313647	0.414816	0.652958	1.43458	-1.35424	-0.789311	-0.011895	-0.646904	0.267945	0.644431	-1.41027	0.644651	0.290151	0.942482	0.181848	0.502261	-0.284781	2.46447
b0983	gfcE predicted exopolysaccharide export protein	-0.319884	0.685368	0.424935	1.05033	-0.0888609	0.219211	-1.50782	LQ	-0.168539	-0.024383	0.619417	0.816033	1.18657	0.0929178	0.124927	0.146048	-0.107943	-0.270078	0.925564	-0.5495	-1.54338	-0.0133549	0.995044	-0.470586	0.275549	-0.299967	-0.322269	-0.433127	1.12562	0.880739	-0.551018	-1.08221	-0.641845	0.670239	-1.42986	0.364077	-0.964123	0.45212	-0.701376	0.368163	-0.519284	-0.0497556	-0.614516	0.80853
b0984	gfcD putative lipoprotein	0.0886875	0.615234	0.465261	-0.469045	-0.399309	-0.22413	1.10382	-0.0615815	-1.89111	-1.69886	0.398157	0.472262	-0.327666	0.189375	0.106498	-0.216319	-2.10417	-1.59679	-0.602427	-3.14362	-0.648206	-1.00364	-0.499971	0.785972	0.768202	-1.35374	-0.925542	-1.02891	-1.44168	0.618543	-3.43269	-2.45624	0.230917	0.342054	-0.430858	0.649509	-0.23797	0.469682	-1.90064	1.09265	0.613292	0.314345	-0.893051	-0.664658
b0985	gfcC conserved protein	1.03743	0.384412	-2.55589	-1.23331	-0.531453	-2.31191	-6.23262	-2.85806	-2.6406	-3.7297	1.23948	3.24016	-0.371611	0.182413	0.376486	-0.126241	1.19746	1.44685	-2.11881	-3.59294	0.687758	0.661078	-0.986368	-0.428786	0.018581	-1.81724	-1.18392	-1.45948	-4.31351	0.560325	-6.07421	-5.46349	0.162501	0.488663	-1.405	-0.457655	-5.76457	-2.94353	0.301629	-0.575083	-6.64189	-1.17032	-1.05866	-0.153188
b0986	gfcB predicted outer membrane lipoprotein	2.39158	0.648587	-0.0628301	-0.784962	-1.01876	-1.96652	-4.04719	-1.70824	-2.45596	-5.32364	-0.151052	-0.37496	-1.02608	0.0335882	0.17316	-0.221952	1.2623	1.49695	-3.10443	-0.567692	-0.799399	-0.750286	-0.324922	-0.686471	-0.334499	-0.42305	-0.121408	-0.902966	-1.2738	-1.12323	-3.62434	-4.32073	0.10906	0.114138	-0.0246915	0.182733	-0.116076	0.11297	0.635813	0.327444	-5.02165	-0.376239	-0.845119	-1.62269
b0987	gfcA predicted protein	0.799405	0.954448	1.14279	0.11043	-0.39168	-0.632069	1.88244	-1.12327	-1.34999	-1.5454	0.326078	-0.477304	0.126136	1.12389	0.950874	0.117347	-0.76127	-0.641713	-0.214928	-0.108829	-0.145708	-0.299113	-0.143647	0.166845	0.387524	0.461481	0.483415	-0.266829	0.928756	0.425981	-1.922	-1.69629	0.314212	0.275453	-1.83654	0.272657	-1.57718	0.709659	-0.830748	0.291073	0.666878	0.179666	0.180428	-0.752572
b0989	cspH stress protein, member of the CspA family	1.27146	0.60702	2.39882	-1.94898	0.113996	-2.88754	2.42202	-1.31924	1.26827	-2.25581	0.868201	-0.440461	-1.14812	-2.16031	-2.25868	2.10612	1.55625	1.36925	-0.453787	-1.76116	-2.43419	-0.114794	-0.378927	-0.530902	0.734974	0.679837	-0.00742355	-0.0244697	1.19	0.272029	-3.88562	-3.63721	1.9002	-0.587015	1.05351	-0.40053	-1.31196	0.21632	-0.193622	-0.101203	-0.00314573	0.932	0.390411	-0.401713
b0991	ymcE YmcE	0.304889	0.497753	-0.718251	LQ	-1.0129	LQ	-0.410377	LQ	-0.318423	-0.1377	-0.460321	1.03767	0.244666	-0.315821	0.0530011	-0.307268	0.349172	0.197724	0.0403191	-0.892213	1.91554	-0.631705	0.262116	-0.114691	0.0444757	0.10061	0.119102	-0.768329	1.24638	0.554083	-1.90808	-1.21573	-0.98372	-0.90455	-1.10694	-0.388935	-0.715069	0.829131	-1.18491	0.178179	-1.16926	0.170802	-0.787736	-1.10965
b0992	yccM hypothetical protein	0.902036	0.568334	0.775378	-1.92531	LQ	-0.805491	-0.980842	-1.48863	LQ	-2.02492	-0.544211	-2.38186	1.27665	0.725036	0.676353	1.32455	-0.388102	-0.312953	-2.05114	-0.745067	-1.80535	2.22834	0.140538	-0.560123	-0.620918	0.510714	0.131379	0.0089638	-3.44692	0.645992	-5.35813	-5.16298	-1.34968	-0.885883	LQ	0.636506	-2.32158	-0.443329	-1.62934	-0.787287	-5.30684	0.922842	-3.222	0.680468
b0993	torS TorS-P his850	-0.975273	0.867525	0.766239	1.05927	0.171346	-0.0108636	-1.92776	-0.142736	-1.93045	0.673698	0.835789	2.21058	0.81629	0.687056	0.497617	0.831995	1.75845	1.82184	0.619983	-0.24133	-0.107307	-0.718825	0.651142	-0.172316	0.738008	0.427003	0.234769	-0.217692	0.8159	0.562925	-0.772015	-1.33339	0.198567	0.540539	1.18541	-0.28867	-1.79869	0.816777	0.263947	0.304213	-1.67846	0.158251	0.547429	-0.846138
b0994	torT TorT-TMAO	-1.35581	1.00012	1.74923	0.699904	0.417294	1.31001	-0.0853338	0.351254	0.442462	1.77842	1.32767	2.08179	0.891266	1.60275	1.73219	0.27813	2.14016	2.50331	0.827504	-1.03934	-0.0667347	0.465678	1.4355	-0.720769	0.754157	0.834064	0.825466	1.09112	0.390288	1.26976	2.05422	2.21969	0.714553	0.223833	1.00449	1.77324	-1.15032	1.28816	1.80205	1.80555	-1.31085	0.968893	0.077485	0.42623
b0995	torR TorR transcriptional dual regulator	-1.11932	0.914127	0.19707	2.03154	0.272382	0.347191	-1.58422	-0.534885	0.00382321	-0.135081	1.26553	-0.288498	0.524536	-0.0337477	0.353359	0.396682	1.51608	1.8306	1.42607	0.175273	-1.45813	-1.07406	0.847207	0.287305	-0.46198	0.607813	0.754527	0.528339	-0.267626	0.585764	-1.69838	-0.943675	-0.325105	-0.447599	1.21236	-0.145319	-1.07664	1.10816	2.15193	0.216811	-1.45089	0.343767	-1.3587	-1.09528
b0996	torC TorC trimethylamine N-oxide reductase, cytochrome c-type subunit	-0.968223	1.13549	0.816482	2.0148	0.359122	-0.22046	0.351191	-0.0704674	0.731652	-0.388531	0.209302	0.763163	0.442061	0.590945	0.369005	0.932947	0.812486	1.00292	0.107538	0.455543	-1.44439	-0.123731	0.174678	0.374543	0.0143462	0.1783	-0.107632	0.357832	0.161383	0.869846	-1.82153	-1.71693	-0.375819	-0.0872037	0.355514	0.714076	-1.40748	0.564642	0.146919	0.33983	0.43954	0.290363	-0.289983	0.402155
b0997	torA trimethylamine N-oxide reductase, catalytic subunit	-1.158	0.874243	-0.245958	0.424673	0.235961	0.268261	-0.614833	1.21378	-0.865211	-0.003606	0.703804	0.5897	0.569543	0.555128	0.405131	0.450892	-0.337409	-0.388137	1.38211	-1.11361	-0.429834	-1.25512	1.12693	1.04507	0.877781	0.263277	0.20725	0.526566	1.81897	0.647434	0.136325	0.455056	0.165228	0.994043	0.452417	0.0790684	-0.738938	0.925607	-1.61792	0.142962	-1.29357	0.326281	-0.206537	-1.51721
b0998	torD chaperone protein for trimethylamine-N-oxide oxidoreductase I	-0.963159	0.726435	0.110437	1.3974	1.40988	1.56741	3.54788	1.04295	0.252357	1.91336	1.67001	2.3619	0.992067	-0.887898	-0.809618	0.744608	0.807423	0.26831	-0.253165	-3.33688	0.567533	-3.1632	1.83815	1.60965	1.77912	0.793494	0.513235	1.11247	2.06721	2.13174	-2.44	-1.95526	0.898706	0.173647	0.604143	0.274896	-4.62363	0.476868	-1.37821	2.85659	-0.540173	-0.580928	-3.24014	2.57181
b0999	cbpM chaperone-modulator protein CbpM	-0.748389	0.831024	1.00679	-0.148691	0.103259	0.432155	0.381423	0.0353622	-0.757732	-0.265073	0.299938	0.981736	-0.338081	1.42563	1.46789	-0.942689	-0.585874	-0.27828	-0.582113	-1.00043	-1.00266	0.167958	1.24879	-0.741276	0.466116	-0.614608	-0.438137	0.336279	1.78021	1.74786	-1.16696	-0.948249	-0.720088	-0.49372	-0.829895	1.48675	-1.33194	0.574105	-1.23487	-0.162376	-0.678145	1.46018	-0.55341	-0.599547
b1000	cbpA CbpA monomer	-0.066294	0.581226	-1.8911	-1.23402	-1.40307	-1.46302	-1.10196	-0.0655808	-3.43021	-2.62875	-0.601387	-2.03393	-1.43666	-0.962815	-1.28368	-1.26385	1.53333	2.41431	-2.28558	-3.8746	-0.114256	0.143116	0.746097	0.257302	0.518731	-1.27027	-1.04934	0.778565	-1.19828	0.494571	-0.294134	-0.0635408	0.885246	1.52951	0.398543	1.19207	-2.46062	-0.358465	-0.395028	-2.9967	-4.47037	-2.44377	0.885869	-3.53454
b1002	agp 3-phytase / glucose-1-phosphatase	-0.153391	0.55612	1.4722	-1.45308	-0.249642	0.359492	0.858362	0.628584	-3.62592	-1.85801	0.935108	-2.2404	0.637861	0.855255	0.423751	1.28115	-1.03703	-0.933136	1.4213	3.14973	-2.08361	0.0438839	0.664801	0.726125	0.27069	1.09794	1.28038	-0.727237	-0.357694	-0.653415	-0.0447571	0.263077	-0.573013	-0.309167	0.135804	0.561709	0.882857	0.647456	-0.8341	1.78161	0.0230265	0.0450655	-0.827179	-0.421174
b1003	yccJ predicted protein	-0.471819	0.497439	0.0526819	0.0870658	0.499577	0.562322	0.00449613	0.620838	-0.110866	0.877989	1.31949	1.11062	0.863659	0.777829	0.63804	1.60766	0.850458	0.825729	0.423616	-0.766147	-0.901761	-0.644351	1.01503	1.00195	0.94822	0.324743	0.511556	-0.189447	0.771203	0.999069	-0.256219	0.247141	-0.387869	0.58857	-0.045226	1.32969	-1.30031	1.63035	-0.817264	1.40809	1.69315	-0.685966	0.81903	2.60293
b1004	wrbA WrbA monomer	-0.623729	0.300147	4.22586	-0.225097	1.00323	1.05424	-2.45984	1.26516	-4.295	-0.389935	2.27637	2.30001	1.10649	1.91144	1.64904	4.80755	2.70467	2.8265	-0.754893	-3.0062	-0.767355	-1.76078	1.69231	0.203041	1.08701	1.40601	1.52877	-2.94635	0.112075	4.96099	-2.25223	-1.89327	0.027723	-0.19877	1.99278	3.63439	-1.10131	1.17001	-2.00259	2.03057	-1.19314	0.296858	-1.18088	-0.251829
b1005	ycdF	0.577323	0.741211	-0.446861	-0.890804	-0.0037044	-0.463098	1.02753	-0.70206	-1.4193	-0.603773	-1.20573	-0.635008	-0.699339	0.344593	-0.445846	-0.312288	-1.25645	-0.755756	0.0255071	0.330115	-0.636484	-0.0733041	0.709801	0.258131	-0.115086	0.0692512	-0.42084	-0.073604	-0.72796	-0.628719	-2.39808	-1.91429	-0.0761424	0.0991017	-0.377147	0.833562	-1.96942	1.08941	0.598435	0.0660314	0.687801	-0.849867	-0.244376	-1.78429
b1006	rutG predicted xanthine/uracil transporter	-1.0789	0.949079	-1.04033	0.511913	0.197696	0.804872	1.42567	0.614954	-1.43781	1.1517	0.230696	-0.246843	0.977839	0.13114	0.301024	0.386049	-1.20478	-0.888999	1.42126	-0.385866	-1.49328	1.21836	1.3035	-0.721136	0.00634748	0.82621	1.19584	0.00587034	-0.246917	0.985206	-1.98906	-2.4144	-0.583517	1.46265	0.155427	1.2975	-1.81992	1.40939	-1.10884	1.30276	-1.82056	-0.298177	-0.543252	1.93354
b1007	rutF predicted flavin reductase	-1.38777	0.576807	-0.738186	-0.929994	0.270417	0.550274	0.409078	-0.164642	-0.374983	-0.140407	0.455184	1.19336	0.7412	0.46547	0.618223	-0.147454	0.191815	-0.158581	1.05275	1.03302	-0.492992	1.59692	1.46941	-0.658245	1.06976	-0.194197	0.25715	-1.21487	0.690095	0.88926	-1.51715	-1.48285	-0.818713	0.383582	0.224028	-0.239242	-1.54035	2.84215	-0.294858	1.01671	-0.813098	1.86565	0.185792	1.11697
b1008	rutE predicted nitroreductase	-1.08079	0.885061	1.74303	0.477062	0.373638	1.03228	1.224	-0.178162	-0.475214	-0.54358	0.657555	1.55355	-0.0295748	1.11471	1.07678	1.07688	-1.90722	-0.776846	2.67429	2.48342	-1.61194	0.682488	0.950921	-1.6256	-0.1345	0.752953	0.861359	0.0554875	-0.366604	-0.163679	-2.39393	-1.53292	0.279008	1.08627	-1.24447	0.151023	-1.80636	0.0285565	0.663677	-0.428447	-1.57112	0.148634	-0.0306917	0.754306
b1009	rutD alpha;/beta;-hydrolase	-1.26304	0.896211	-0.263176	0.032779	0.222046	0.339291	-1.27841	0.215175	-1.06124	0.670868	1.06143	0.361149	0.43345	1.99031	2.02478	0.326433	0.630601	0.525859	1.23668	2.43487	0.426545	-1.43462	0.75009	-1.61589	2.49352	0.26297	0.328483	-1.22631	0.827371	0.923669	-1.47109	-1.55911	0.394447	1.15757	0.419363	0.240324	-1.20967	0.812463	2.36496	1.23906	-0.939887	0.593901	0.131332	-1.25766
b1010	rutC predicted endoribonuclease	-0.808174	0.830459	1.48397	1.04358	0.25293	1.14	1.80813	1.00027	-0.341147	-0.102783	-0.275141	0.32707	0.721137	0.94545	0.978587	-0.128075	-0.207441	0.201521	-0.210688	-0.467334	-1.33198	-0.545839	0.465086	-0.693343	0.482007	0.496288	0.532744	-1.17327	1.86745	1.81027	-0.845725	-0.834837	-0.988949	-0.112306	-1.4737	-0.347147	0.557215	1.11469	-0.437	0.256643	-0.299566	-0.292367	-0.232404	1.08592
b1011	rutB predicted isochorismatase	-1.68567	1.10726	1.156	0.346741	-0.0921421	0.648019	-0.256918	-0.170905	0.0560238	0.764943	0.579415	0.00319724	0.660119	0.645593	0.688751	0.111728	-0.939894	-0.580439	0.895391	1.96094	-1.19504	-0.852716	0.452426	-0.10624	0.449609	0.150811	0.347245	-0.0196134	2.03011	0.242736	-1.42154	-1.21962	-0.198492	0.499081	-0.644747	0.351459	0.371924	0.254066	-0.369796	0.0114102	-0.919522	0.468208	-0.405504	0.0229958
b1012	rutA predicted coenzyme F 420 -dependent N 5,N 10-methylenetetrahydromethanopterin reductase	-1.28712	1.09325	0.645349	0.726467	0.545264	0.452212	-0.58086	0.542354	-0.931317	1.4902	0.0259096	-0.743553	0.279842	0.217592	0.221988	-0.223238	-0.586269	-0.384482	-0.440178	0.89556	0.594833	-1.52464	0.100025	0.863333	0.996546	-0.284959	0.0646503	0.175978	-0.571119	0.774183	-1.91011	-1.52895	-0.670826	-0.100679	0.224518	-0.713431	-2.09742	-0.0797748	0.215175	0.0637765	-2.06509	-0.8556	0.0273173	-1.67452
b1013	rutR predicted DNA-binding transcriptional regulator	-0.617451	1.32973	-0.139473	-0.572507	0.332553	-0.37134	-1.16536	0.507497	-1.01067	-0.121293	0.623719	0.852236	-0.317727	-0.0255611	0.0889424	-0.45151	1.13859	1.26144	-0.201986	-0.602799	1.75341	-1.25032	0.260804	1.10319	0.553201	0.454966	0.512487	-0.0948487	-0.374623	-0.387836	-1.37733	-1.16459	-0.167975	-0.783257	0.709554	-0.828751	-1.34776	0.411661	-1.11559	-0.400961	-1.19132	-0.355041	1.66323	-1.21613
[truncated: 3,081 more rows]
