# Supplementary material for: Genetic Architecture of Intrinsic Antibiotic Susceptibility
Source: PubMed Central journal article supplement (PMC2680486; doi:10.1371/journal.pone.0005629), 2009-05-20
Supplement: pone.0005629.s002.pdf [file pone.0005629.s002.pdf]

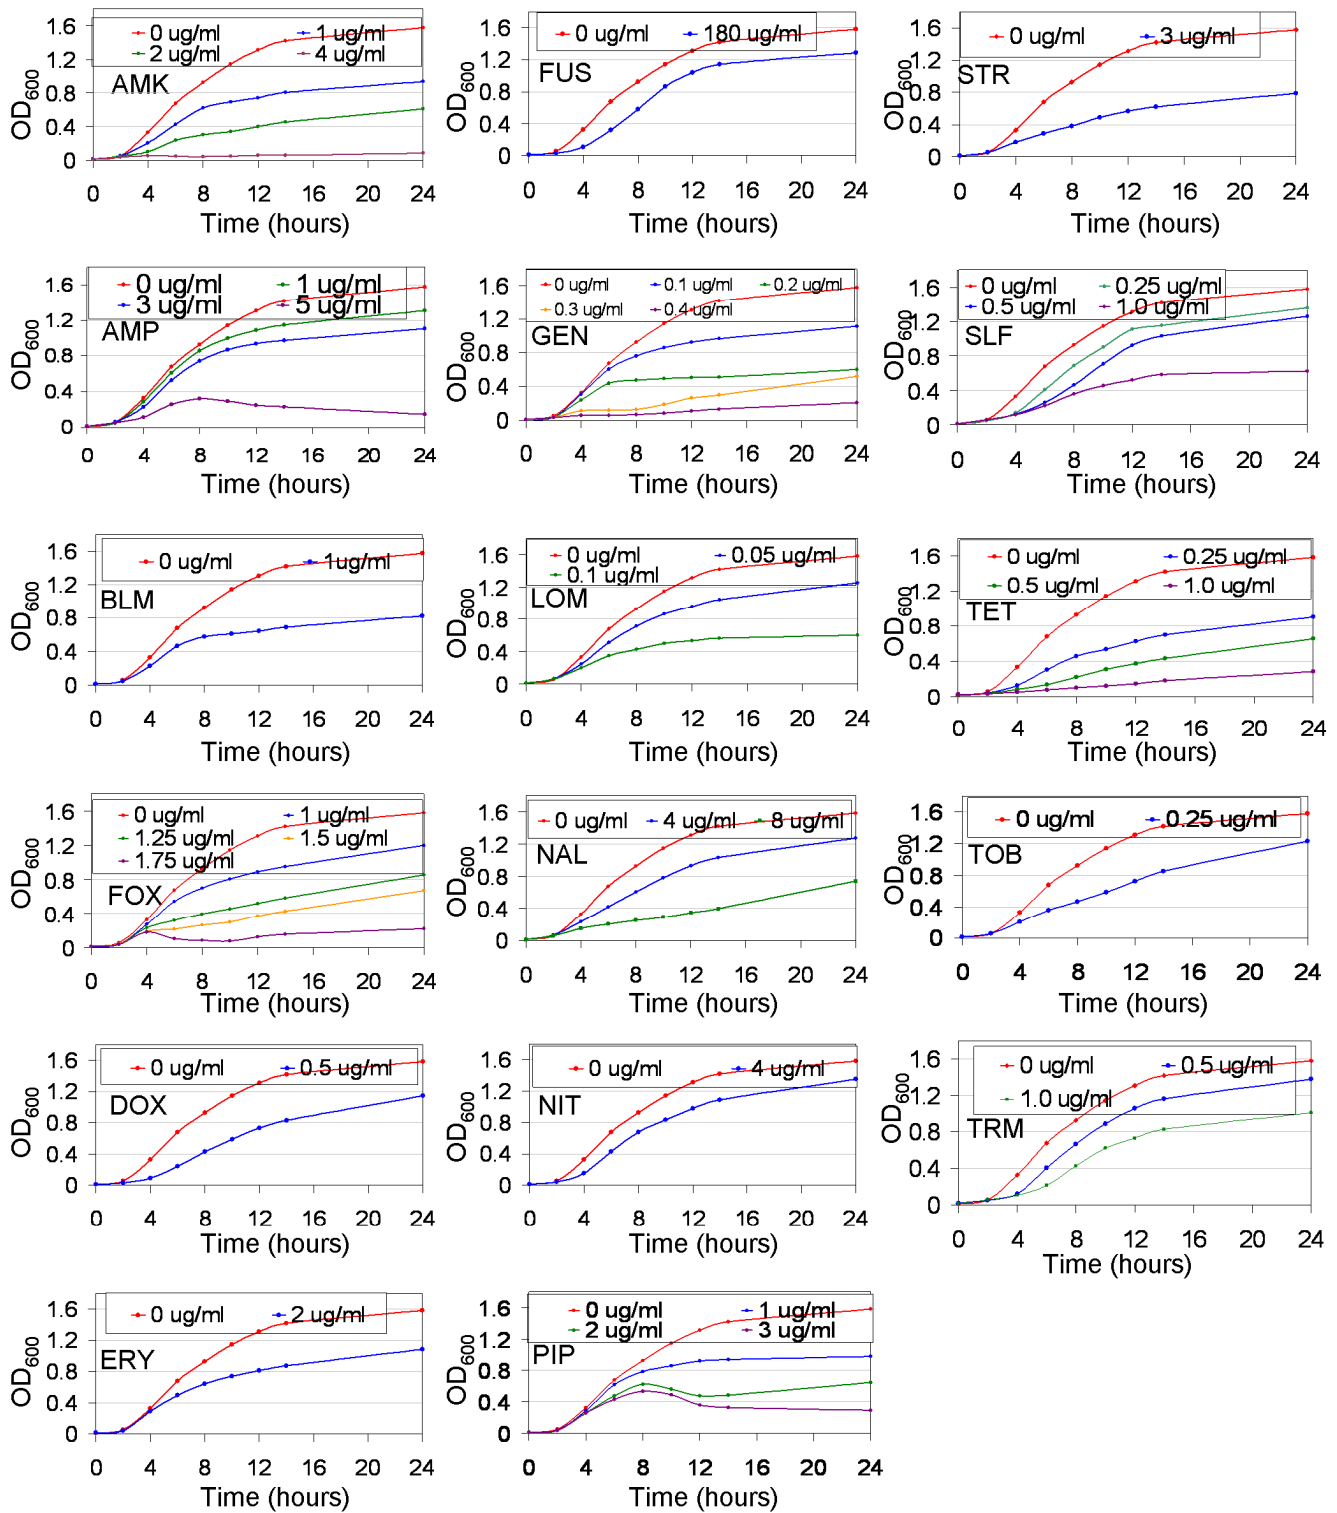

**Figure S1. Dose Response Curves Used to Select Drug Concentrations.**

For each antibiotic, fresh media containing various drug concentrations was inoculated with overnight culture of the wild-type strain. Cultures were shaken at 37°C, and growth was monitored using OD<sub>600</sub> readings. Blue indicates the concentrations chosen for the enrichments.
