# Supplementary material for: Genetic Architecture of Intrinsic Antibiotic Susceptibility
Source: PubMed Central journal article supplement (PMC2680486; doi:10.1371/journal.pone.0005629), 2009-05-20
Supplement: pone.0005629.s007.pdf [file pone.0005629.s007.pdf]

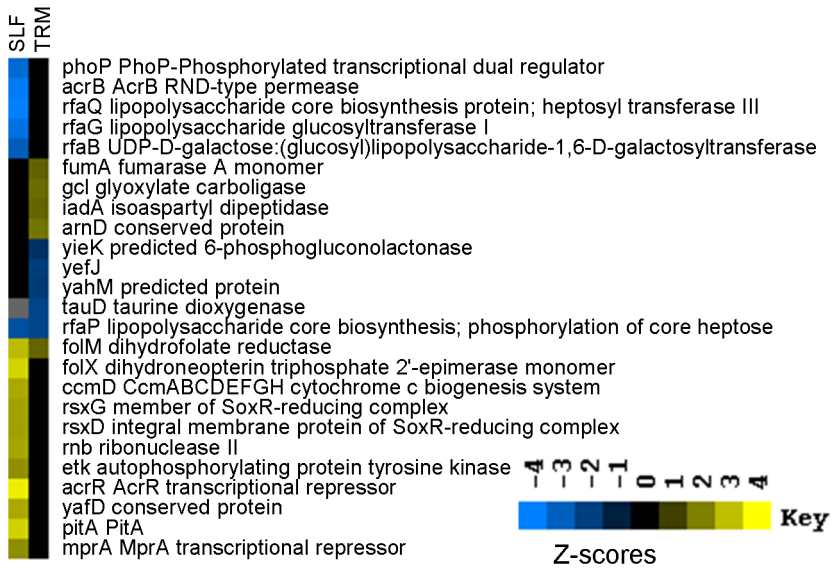

**Figure S6. Loci whose disruption was significant in at least one folic acid biosynthesis inhibitor.**

Yellow (blue) indicates that transposon insertions in or near a gene were beneficial (deleterious). Black indicates no significant effect; gray indicates missing data. Z-scores were calculated as described in *Materials and Methods*.
