# Supplementary material for: Genetic Architecture of Intrinsic Antibiotic Susceptibility
Source: PubMed Central journal article supplement (PMC2680486; doi:10.1371/journal.pone.0005629), 2009-05-20
Supplement: pone.0005629.s008.pdf [file pone.0005629.s008.pdf]

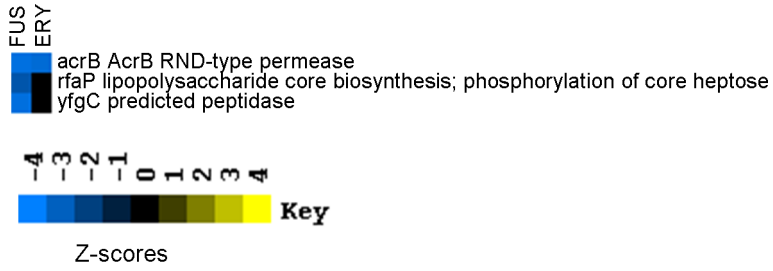

**Figure S7. Loci whose disruption was significant in at least one inhibitor of the 50S subunit of the ribosome.** Yellow (blue) indicates that transposon insertions in or near a gene were beneficial (deleterious). Black indicates no significant effect. Z-scores were calculated as described in *Materials and Methods*.
