# Supplementary material for: Genetic Architecture of Intrinsic Antibiotic Susceptibility
Source: PubMed Central journal article supplement (PMC2680486; doi:10.1371/journal.pone.0005629), 2009-05-20
Supplement: pone.0005629.s009.pdf [file pone.0005629.s009.pdf]

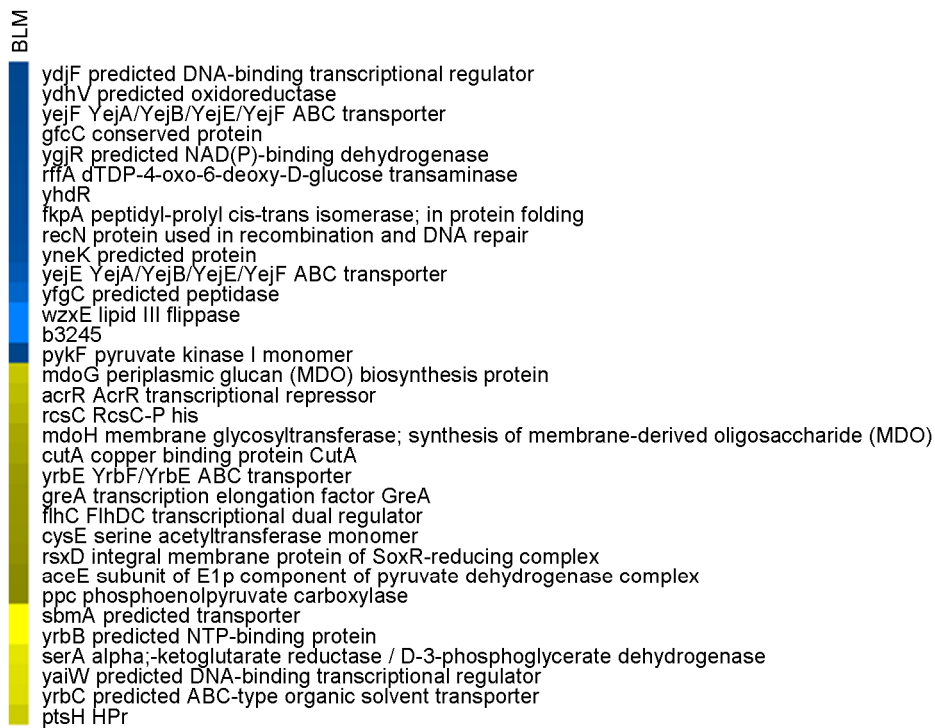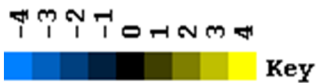

Z-score

**Figure S8. Loci whose disruption was significant in bleomycin.**

Yellow (blue) indicates that transposon insertions in or near a gene were beneficial (deleterious). Z-scores were calculated as described in *Materials and Methods*.
