# Supplementary material for: Genetic Architecture of Intrinsic Antibiotic Susceptibility
Source: PubMed Central journal article supplement (PMC2680486; doi:10.1371/journal.pone.0005629), 2009-05-20
Supplement: pone.0005629.s010.pdf [file pone.0005629.s010.pdf]

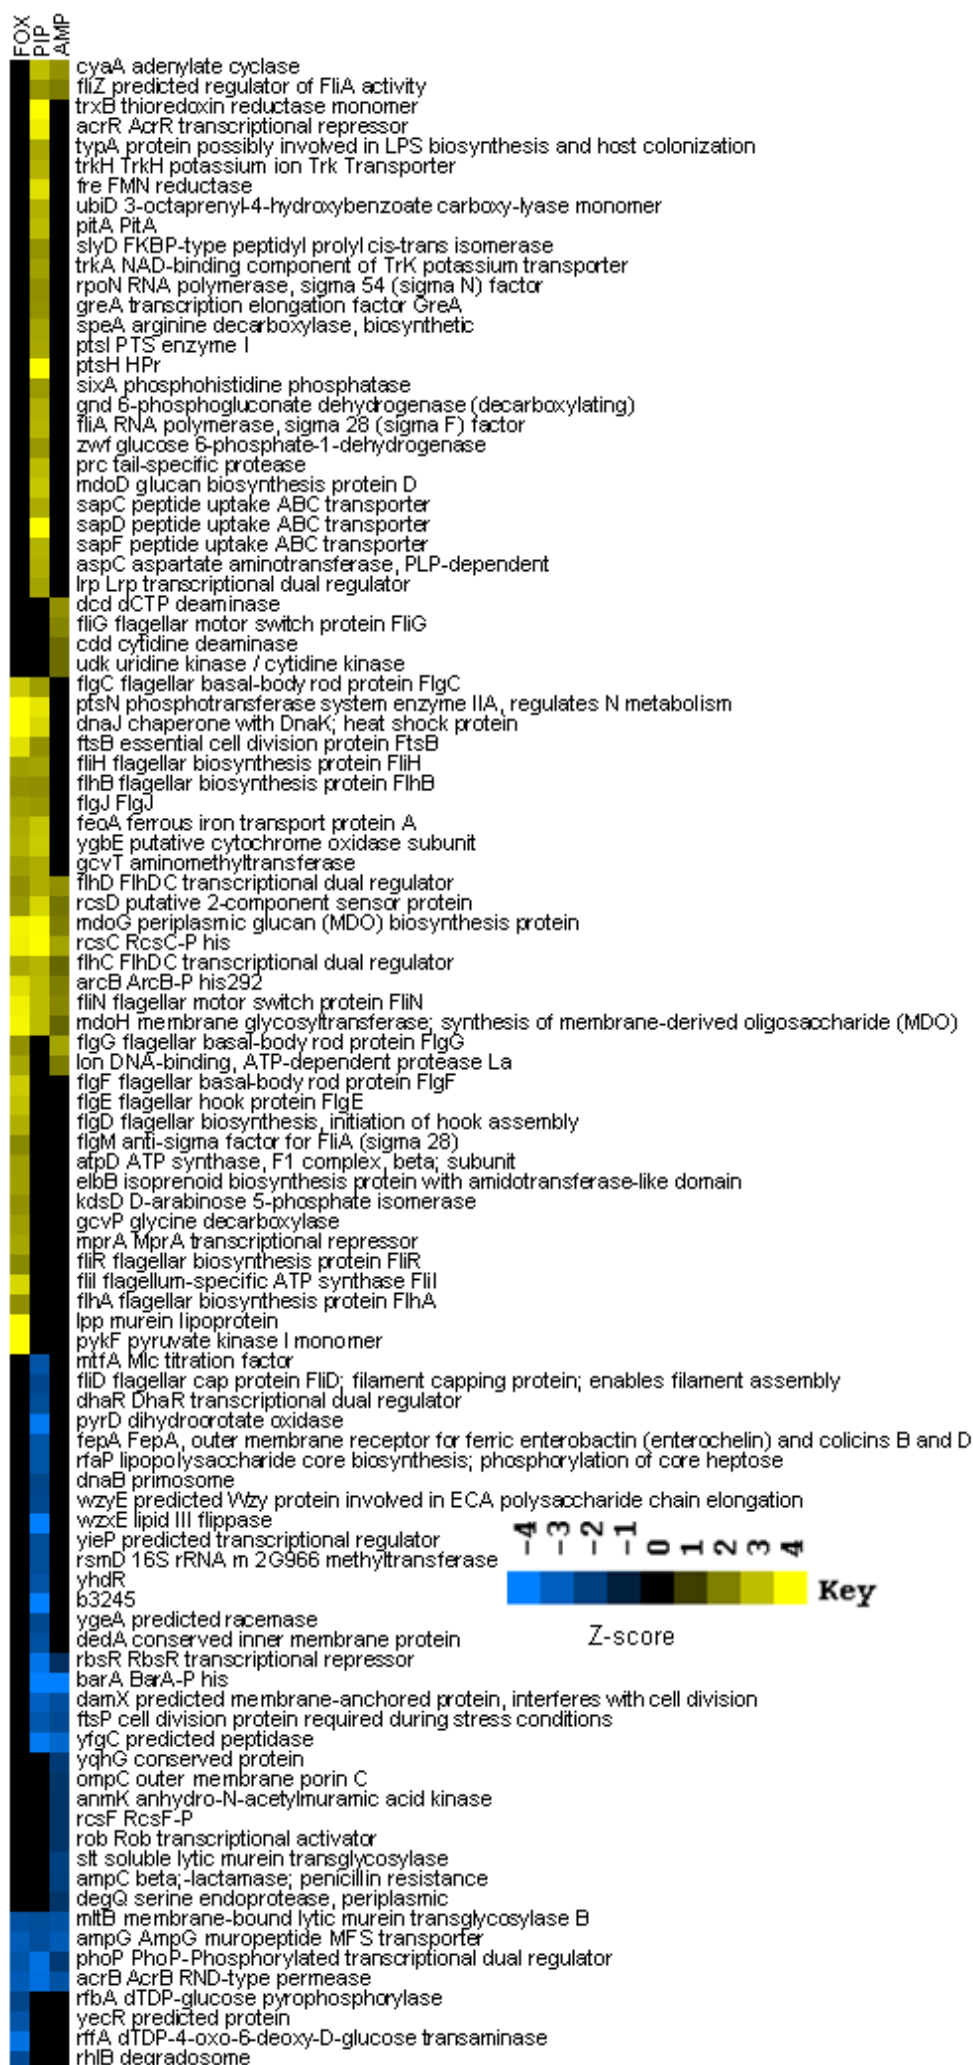

**Figure S9. Loci whose disruption was significant in at least one  $\beta$ -lactam.**

Yellow (blue) indicates that transposon insertions in or near a gene were beneficial (deleterious). Black indicates no significant effect. Z-scores were calculated as described in *Materials and Methods*. Note that this set of loci is distinct from the set of loci whose disruption caused significant changes in all the  $\beta$ -lactams tested (Table S2).
