# Supplementary material for: Genetic Architecture of Intrinsic Antibiotic Susceptibility
Source: PubMed Central journal article supplement (PMC2680486; doi:10.1371/journal.pone.0005629), 2009-05-20
Supplement: pone.0005629.s011.pdf [file pone.0005629.s011.pdf]

NIT

rhIB degradosome  
recN protein used in recombination and DNA repair  
recQ ATP-dependent DNA helicase  
uvrA excision nuclease subunit A  
yebZ putative resistance protein  
ybdJ predicted inner membrane protein  
yigW<sub>2</sub>  
gltS GltS glutamate transporter  
yfgA putative membrane protein  
nfsA NADPH nitroreductase  
ychH predicted inner membrane protein  
ybjC predicted inner membrane protein  
ompR OmpR transcriptional dual regulator  
b2773

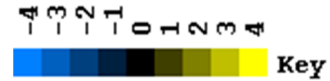

Z-score

**Figure S10. Loci whose disruption was significant in nitrofurantoin.**

Yellow (blue) indicates that transposon insertions in or near a gene were beneficial (deleterious). Z-scores were calculated as described in *Methods*.
