# Supplementary material for: Genetic Architecture of Intrinsic Antibiotic Susceptibility
Source: PubMed Central journal article supplement (PMC2680486; doi:10.1371/journal.pone.0005629), 2009-05-20
Supplement: pone.0005629.s013.pdf [file pone.0005629.s013.pdf]

**Table S1. Loci that changed susceptibility to all aminoglycosides tested.**

| <b>bnum</b> | <b>Effect</b> | <b>Annotation</b>                                                                                                            | <b>Comment</b>                                                                                                                                                                                                          | <b>References</b> |
|-------------|---------------|------------------------------------------------------------------------------------------------------------------------------|-------------------------------------------------------------------------------------------------------------------------------------------------------------------------------------------------------------------------|-------------------|
| b0295       | down          | <i>ykgL</i> predicted protein                                                                                                |                                                                                                                                                                                                                         |                   |
| b0904       | down          | <i>focA</i> formate FNT transporter                                                                                          |                                                                                                                                                                                                                         |                   |
| b1235       | down          | <i>rssB</i> regulator of RpoS                                                                                                |                                                                                                                                                                                                                         |                   |
| b1479       | down          | <i>maeA</i> malate dehydrogenase, NAD-requiring                                                                              |                                                                                                                                                                                                                         |                   |
| b1481       | down          | <i>bdm</i> biofilm-dependent modulation protein                                                                              |                                                                                                                                                                                                                         |                   |
| b1626       | down          | <i>ydgK</i> conserved inner membrane protein                                                                                 |                                                                                                                                                                                                                         |                   |
| b1627       | down          | <i>rsxA</i> integral membrane protein of SoxR-reducing complex                                                               |                                                                                                                                                                                                                         |                   |
| b1770       | down          | <i>ydjF</i> predicted DNA-binding transcriptional regulator                                                                  |                                                                                                                                                                                                                         |                   |
| b1825       | down          | <i>yebO</i> predicted protein                                                                                                |                                                                                                                                                                                                                         |                   |
| b1840       | down          | <i>yebZ</i> putative resistance protein                                                                                      |                                                                                                                                                                                                                         |                   |
| b1976       | down          | <i>mtfA</i> Mlc titration factor                                                                                             |                                                                                                                                                                                                                         |                   |
| b2275       | down          | <i>yfbP</i> predicted protein                                                                                                |                                                                                                                                                                                                                         |                   |
| b3498       | down          | <i>prcC</i> oligopeptidase A                                                                                                 |                                                                                                                                                                                                                         |                   |
| b4348       | down          | <i>hsdS</i> specificity determinant for <i>hsdM</i> and <i>hsdR</i>                                                          |                                                                                                                                                                                                                         |                   |
| b0014       | up            | <i>dnaK</i> chaperone Hsp70                                                                                                  |                                                                                                                                                                                                                         |                   |
| b0113       | up            | <i>pdhR</i> transcriptional dual regulator                                                                                   | Signal likely came either from the neighboring gene or from insertions in the gene's pyruvate-binding domain. Deletion of the complete gene should increase NADH levels and increase susceptibility to aminoglycosides. |                   |
| b0114       | up            | <i>aceE</i> subunit of E1p component of pyruvate dehydrogenase complex                                                       |                                                                                                                                                                                                                         |                   |
| b0115       | up            | <i>aceF</i> AceF-lipoate                                                                                                     |                                                                                                                                                                                                                         | [1]               |
| b0118       | up            | <i>acnB</i> aconitase B                                                                                                      |                                                                                                                                                                                                                         | [2]               |
| b0171       | up            | <i>pyrH</i> uridylate kinase                                                                                                 |                                                                                                                                                                                                                         |                   |
| b0172       | up            | <i>frr</i> ribosome recycling factor                                                                                         |                                                                                                                                                                                                                         |                   |
| b0413       | up            | <i>nrdR</i> DNA-binding transcriptional regulator                                                                            | Signal likely came from neighboring gene.                                                                                                                                                                               |                   |
| b0414       | up            | <i>ribD</i> fused diaminohydroxyphosphoribosylaminopyrimidine deaminase / 5-amino-6-(5-phosphoribosylamino) uracil reductase |                                                                                                                                                                                                                         |                   |
| b0421       | up            | <i>ispA</i> geranyl diphosphate synthase / farnesyl diphosphate synthase                                                     |                                                                                                                                                                                                                         |                   |
| b0422       | up            | <i>xseB</i> exonuclease VII, small subunit                                                                                   |                                                                                                                                                                                                                         |                   |
| b0427       | up            | <i>yajR</i> YajR MFS transporter                                                                                             |                                                                                                                                                                                                                         |                   |
| b0428       | up            | <i>cyoE</i> heme O synthase                                                                                                  |                                                                                                                                                                                                                         | [2,3]             |
| b0430       | up            | <i>cyoC</i> cytochrome bo terminal oxidase subunit III                                                                       |                                                                                                                                                                                                                         |                   |
| b0431       | up            | <i>cyoB</i> cytochrome bo terminal oxidase subunit I                                                                         |                                                                                                                                                                                                                         |                   |
| b0628       | up            | <i>lipA</i> lipoate synthase monomer                                                                                         |                                                                                                                                                                                                                         | [2]               |
| b0630       | up            | <i>lipB</i> lipoyl-protein ligase                                                                                            |                                                                                                                                                                                                                         |                   |

|       |    |                                                                                                                  |                                                                                        |       |
|-------|----|------------------------------------------------------------------------------------------------------------------|----------------------------------------------------------------------------------------|-------|
| b0662 | up | <i>ubiF</i> 2-octaprenyl-3-methyl-6-methoxy-1,4-benzoquinone hydroxylase                                         |                                                                                        | [2]   |
| b0724 | up | <i>sdihB</i> succinate dehydrogenase iron-sulfur protein                                                         |                                                                                        | [2]   |
| b0755 | up | <i>gpmA</i> phosphoglyceromutase 1 monomer                                                                       |                                                                                        |       |
| b1109 | up | <i>ndh</i> NADH dehydrogenase II                                                                                 |                                                                                        |       |
| b1187 | up | <i>fadR</i> FadR transcriptional dual regulator                                                                  |                                                                                        |       |
| b1275 | up | <i>cysB</i> CysB-O-acetyl-L-serine                                                                               |                                                                                        |       |
| b2232 | up | <i>ubiG</i> bifunctional 3-demethylubiquinone-8 3-O-methyltransferase and 2-octaprenyl-6-hydroxyphenol methylase |                                                                                        | [2]   |
| b2278 | up | <i>nuoL</i> NADH dehydrogenase I                                                                                 |                                                                                        | [2,3] |
| b2279 | up | <i>nuoK</i> NADH dehydrogenase I                                                                                 |                                                                                        | [2]   |
| b2280 | up | <i>nuoJ</i> NADH dehydrogenase I                                                                                 |                                                                                        | [2,3] |
| b2281 | up | <i>nuoI</i> NADH dehydrogenase I                                                                                 |                                                                                        | [3]   |
| b2282 | up | <i>nuoH</i> NADH dehydrogenase I                                                                                 |                                                                                        | [2,3] |
| b2283 | up | <i>nuoG</i> NADH dehydrogenase I                                                                                 |                                                                                        | [2,3] |
| b2284 | up | <i>nuoF</i> NADH dehydrogenase I                                                                                 |                                                                                        | [2,3] |
| b2285 | up | <i>nuoE</i> NADH dehydrogenase I                                                                                 |                                                                                        | [2,3] |
| b2286 | up | <i>nuoC</i> NADH dehydrogenase I                                                                                 |                                                                                        | [2,3] |
| b2287 | up | <i>nuoB</i> NADH dehydrogenase I                                                                                 |                                                                                        | [3]   |
| b2297 | up | <i>pta</i> phosphate acetyltransferase                                                                           |                                                                                        |       |
| b2311 | up | <i>ubiX</i> 3-octaprenyl-4-hydroxybenzoate decarboxylase together with UbiG                                      |                                                                                        | [2]   |
| b2416 | up | <i>ptsI</i> PTS enzyme I                                                                                         |                                                                                        |       |
| b2417 | up | <i>crr</i> N-acetylmuramic acid PTS permease                                                                     |                                                                                        |       |
| b2516 | up | <i>yfgA</i> putative membrane protein                                                                            |                                                                                        |       |
| b2531 | up | <i>iscR</i> transcriptional dual regulator                                                                       |                                                                                        |       |
| b2601 | up | <i>aroF</i> 2-dehydro-3-deoxyphosphoheptonate aldolase                                                           |                                                                                        |       |
| b2618 | up | <i>yjfF</i> predicted protein                                                                                    |                                                                                        | [2]   |
| b2619 | up | <i>yjfG</i> toxin of a putative toxin-antitoxin pair                                                             |                                                                                        | [2]   |
| b2898 | up | <i>ygfZ</i> folate-binding protein                                                                               |                                                                                        | [2]   |
| b2906 | up | <i>visC</i> predicted oxidoreductase, FAD/NAD(P)-binding domain                                                  | Signal likely came from b2906 ( <i>ubiH</i> ), which was not represented on the array. |       |
| b2908 | up | <i>pepP</i> proline aminopeptidase P II                                                                          | Signal likely came from b2906 ( <i>ubiH</i> ), which was not represented on the array. |       |
| b2913 | up | <i>serA</i> alpha;-ketoglutarate reductase / D-3-phosphoglycerate dehydrogenase                                  |                                                                                        |       |
| b2925 | up | <i>fbaA</i> fructose bisphosphate aldolase monomer                                                               |                                                                                        |       |
| b2926 | up | <i>pgk</i> phosphoglycerate kinase                                                                               |                                                                                        |       |
| b2927 | up | <i>epd</i> erythrose 4-phosphate dehydrogenase                                                                   |                                                                                        | [4]   |
| b2935 | up | <i>tktA</i> transketolase I                                                                                      |                                                                                        |       |
| b3384 | up | <i>trpS</i> tryptophanyl-tRNA synthetase                                                                         | Signal likely came from neighboring gene.                                              |       |
| b3386 | up | <i>rpe</i> ribulose phosphate 3-epimerase                                                                        |                                                                                        |       |

|       |    |                                                                                                                    |                                           |       |
|-------|----|--------------------------------------------------------------------------------------------------------------------|-------------------------------------------|-------|
| b3387 | up | <i>dam</i> DNA adenine methylase                                                                                   | Signal likely came from neighboring gene. | [2]   |
| b3410 | up | <i>feoC</i> conserved protein                                                                                      |                                           |       |
| b3413 | up | <i>gntX</i> protein involved in utilization of DNA as a carbon source                                              | Signal likely came from neighboring gene. |       |
| b3414 | up | <i>gntY</i> protein involved in utilization of DNA as a carbon source                                              |                                           |       |
| b3607 | up | <i>cysE</i> serine acetyltransferase monomer                                                                       |                                           | [2,3] |
| b3608 | up | <i>gpsA</i> glycerol-3-phosphate-dehydrogenase-[NAD <sup>+</sup> ]                                                 |                                           |       |
| b3650 | up | <i>spoT</i> GDP diphosphokinase / guanosine-3',5'-bis(diphosphate) 3'-diphosphatase                                |                                           |       |
| b3745 | up | <i>viaA</i> stimulator of RavA ATPase activity                                                                     |                                           |       |
| b3746 | up | <i>ravA</i> regulatory ATPase                                                                                      |                                           |       |
| b3763 | up | <i>hdfR</i> transcriptional repressor                                                                              |                                           |       |
| b3805 | up | <i>hemC</i> hydroxymethylbilane synthase                                                                           |                                           |       |
| b3834 | up | <i>yigP</i> conserved protein                                                                                      |                                           |       |
| b3843 | up | <i>ubiD</i> 3-octaprenyl-4-hydroxybenzoate carboxy-lyase monomer                                                   |                                           |       |
| b3844 | up | <i>fre</i> FMN reductase                                                                                           |                                           |       |
| b3911 | up | <i>cpxA</i> sensor kinase-phosphotransferase                                                                       |                                           | [5]   |
| b3913 | up | <i>cpxP</i> regulator of the Cpx response and possible chaperone involved in resistance to extracytoplasmic stress |                                           | [2,5] |
| b3914 | up | Obsolete                                                                                                           | Signal likely came from neighboring gene. |       |
| b3919 | up | <i>tpiA</i> triose phosphate isomerase monomer                                                                     |                                           |       |
| b3975 | up | no longer thought to be a gene                                                                                     |                                           |       |
| b4388 | up | <i>serB</i> phosphoserine phosphatase                                                                              |                                           |       |

“Down” indicates that strains with the locus disrupted were depleted during enrichments in aminoglycosides. “Up” indicates that strains with the locus disrupted increased in abundance during the enrichments. See Materials and Methods for details on how the set was identified. In finding references, emphasis was placed on global studies and work in *E. coli*. Expression changes in response to drug addition were not sufficient for inclusion.

## References

1. Kohanski MA, Dwyer DJ, Wierzbowski J, Cottarel G, Collins JJ (2008) Mistranslation of membrane proteins and two-component system activation trigger antibiotic-mediated cell death. *Cell* 135: 679-690.
2. Kohanski MA, Dwyer DJ, Hayete B, Lawrence CA, Collins JJ (2007) A common mechanism of cellular death induced by bactericidal antibiotics. *Cell* 130: 797-810.
3. Schurek KN, Marr AK, Taylor PK, Wiegand I, Semene L, et al. (2008) Novel genetic determinants of low-level aminoglycoside resistance in *Pseudomonas aeruginosa*. *Antimicrob Agents Chemother* 52: 4213-4219.
4. Fajardo A, Martinez-Martin N, Mercadillo M, Galan JC, Ghysels B, et al. (2008) The neglected intrinsic resistome of bacterial pathogens. *PLoS ONE* 3: e1619.
5. Rainwater S, Silverman PM (1990) The Cpx proteins of *Escherichia coli* K-12: evidence that *cpxA*, *ecfB*, *ssd*, and *eup* mutations all identify the same gene. *J Bacteriol* 172: 2456-2461.
