# Supplementary material for: Genetic Architecture of Intrinsic Antibiotic Susceptibility
Source: PubMed Central journal article supplement (PMC2680486; doi:10.1371/journal.pone.0005629), 2009-05-20
Supplement: pone.0005629.s014.pdf [file pone.0005629.s014.pdf]

**Table S2. Loci that changed susceptibility to all  $\beta$ -lactams tested.**

| <b>bnum</b> | <b>Effect</b> | <b>Annotation</b>                                                                 | <b>References</b> |
|-------------|---------------|-----------------------------------------------------------------------------------|-------------------|
| b0196       | down          | <i>rcsF</i> phosphorelay glucose and zinc sensor                                  | [1]               |
| b0433       | down          | <i>ampG</i> muropeptide MFS transporter                                           | [2]               |
| b2317       | down          | <i>dedA</i> conserved inner membrane protein                                      |                   |
| b2701       | down          | <i>mltB</i> membrane-bound lytic murein transglycosylase B                        |                   |
| b2786       | down          | <i>barA</i>                                                                       |                   |
| b3013       | down          | <i>yqhG</i> conserved protein                                                     |                   |
| b3234       | down          | <i>degQ</i> serine endoprotease, periplasmic                                      |                   |
| b3388       | down          | <i>damX</i> predicted membrane-anchored protein, interferes with cell division    |                   |
| b3753       | down          | <i>rbsR</i> transcriptional repressor                                             |                   |
| b3793       | down          | <i>wzyE</i> predicted Wzy protein involved in ECA polysaccharide chain elongation |                   |
| b4150       | down          | <i>ampC</i> beta;-lactamase; penicillin resistance                                | [3]               |
| b4392       | down          | <i>slt</i> soluble lytic murein transglycosylase                                  |                   |
| b0439       | up            | <i>lon</i> DNA-binding, ATP-dependent protease                                    |                   |
| b0888       | up            | <i>trxB</i> thioredoxin reductase monomer                                         |                   |
| b0928       | up            | <i>aspC</i> aspartate aminotransferase, PLP-dependent                             |                   |
| b1071       | up            | <i>flgM</i> anti-sigma factor for FliA (sigma 28)                                 |                   |
| b1074       | up            | <i>flgC</i> flagellar basal-body rod protein                                      |                   |
| b1075       | up            | <i>flgD</i> flagellar biosynthesis, initiation of hook assembly                   |                   |
| b1076       | up            | <i>flgE</i> flagellar hook protein                                                |                   |
| b1077       | up            | <i>flgF</i> flagellar basal-body rod protein                                      |                   |
| b1078       | up            | <i>flgG</i> flagellar basal-body rod protein                                      |                   |
| b1292       | up            | <i>sapC</i> peptide uptake ABC transporter                                        |                   |
| b1677       | up            | <i>lpp</i> murein lipoprotein                                                     |                   |
| b1830       | up            | <i>prc</i> tail-specific protease                                                 |                   |
| b1879       | up            | <i>flhA</i> flagellar biosynthesis protein                                        |                   |
| b1880       | up            | <i>flhB</i> flagellar biosynthesis protein                                        |                   |
| b1891       | up            | <i>flhC</i> FlhDC transcriptional dual regulator                                  |                   |
| b1892       | up            | <i>flhD</i> FlhDC transcriptional dual regulator                                  |                   |
| b1921       | up            | <i>fliZ</i> predicted regulator of FliA activity                                  |                   |
| b1922       | up            | <i>fliA</i> RNA polymerase, sigma 28 (sigma F) factor                             |                   |
| b1939       | up            | <i>fliG</i> flagellar motor switch protein                                        |                   |
| b1940       | up            | <i>fliH</i> flagellar biosynthesis protein                                        |                   |
| b1941       | up            | <i>fliI</i> flagellum-specific ATP synthase                                       |                   |
| b1946       | up            | <i>fliN</i> flagellar motor switch protein                                        |                   |
| b1950       | up            | <i>fliR</i> flagellar biosynthesis protein                                        |                   |
| b2029       | up            | <i>gnd</i> 6-phosphogluconate dehydrogenase (decarboxylating)                     |                   |
| b2066       | up            | <i>udk</i> uridine kinase / cytidine kinase                                       |                   |
| b2143       | up            | <i>cdd</i> cytidine deaminase                                                     |                   |
| b2216       | up            | <i>rcsD</i> putative 2-component sensor protein                                   | [1]               |
| b2684       | up            | <i>mprA</i> transcriptional repressor                                             | [4]               |
| b2903       | up            | <i>gcvP</i> glycine decarboxylase                                                 |                   |
| b2905       | up            | <i>gcvT</i> aminomethyltransferase                                                |                   |
| b3210       | up            | <i>arcB</i> aerobic respiration control sensor protein                            | [5]               |
| b3408       | up            | <i>feoA</i> ferrous iron transport protein A                                      |                   |
| b3843       | up            | <i>ubiD</i> 3-octaprenyl-4-hydroxybenzoate carboxy-lyase monomer                  |                   |

“Down” indicates that strains with the locus disrupted were depleted during enrichments in  $\beta$ -lactams. “Up” indicates that strains with the locus disrupted increased in abundance during the enrichments. See Materials and Methods for details on how the set was identified. In finding references, emphasis was placed on global studies and work in *E. coli*. Expression changes in response to drug addition were not sufficient for inclusion.

## References

1. Laubacher ME, Ades SE (2008) The Rcs phosphorelay is a cell envelope stress response activated by peptidoglycan stress and contributes to intrinsic antibiotic resistance. *J Bacteriol* 190: 2065-2074.
2. Jacobs C, Huang LJ, Bartowsky E, Normark S, Park JT (1994) Bacterial cell wall recycling provides cytosolic muropeptides as effectors for beta-lactamase induction. *Embo J* 13: 4684-4694.
3. Mazzariol A, Cornaglia G, Nikaido H (2000) Contributions of the AmpC beta-lactamase and the AcrAB multidrug efflux system in intrinsic resistance of *Escherichia coli* K-12 to beta-lactams. *Antimicrob Agents Chemother* 44: 1387-1390.
4. Lomovskaya O, Lewis K, Matin A (1995) EmrR is a negative regulator of the *Escherichia coli* multidrug resistance pump EmrAB. *J Bacteriol* 177: 2328-2334.
5. Okusu H, Ma D, Nikaido H (1996) AcrAB efflux pump plays a major role in the antibiotic resistance phenotype of *Escherichia coli* multiple-antibiotic-resistance (Mar) mutants. *J Bacteriol* 178: 306-308.
