# Supplementary material for: Genetic Architecture of Intrinsic Antibiotic Susceptibility
Source: PubMed Central journal article supplement (PMC2680486; doi:10.1371/journal.pone.0005629), 2009-05-20
Supplement: pone.0005629.s015.pdf [file pone.0005629.s015.pdf]

**Table S3. Genes identified in this work as having a general role in antibiotic susceptibility.**

| <b>bnum</b> | <b>Annotation</b>                                                                             | <b>References</b> |
|-------------|-----------------------------------------------------------------------------------------------|-------------------|
| b3791       | <i>rffA</i> dTDP-4-oxo-6-deoxy-D-glucose transaminase                                         | [1]               |
| b3792       | <i>wzxE</i> lipid III flippase                                                                |                   |
| b1904       | <i>yecR</i> predicted protein                                                                 |                   |
| b2616       | <i>recN</i> protein used in recombination and DNA repair                                      | [1,2,3,4]         |
| b2494       | <i>yfgC</i> predicted peptidase                                                               | [1,5]             |
| b0462       | <i>acrB</i> RND-type permease                                                                 | [1,6,7]           |
| b1130       | <i>phoP</i> PhoP-Phosphorylated transcriptional dual regulator                                | [1]               |
| b4396       | <i>rob</i> Rob transcriptional activator                                                      | [8]               |
| b3194       | <i>yrbE</i> YrbF/YrbE ABC transporter                                                         |                   |
| b3191       | <i>yrbB</i> predicted NTP-binding protein                                                     |                   |
| b3632       | <i>rfaQ</i> lipopolysaccharide core biosynthesis protein; heptosyl transferase III            | [9]               |
| b3630       | <i>rfaP</i> lipopolysaccharide core biosynthesis; phosphorylation of core heptose             | [9]               |
| b3628       | <i>rfaB</i> UDP-D-galactose:(glucosyl)lipopolysaccharide-1,6-D-galactosyltransferase          | [9]               |
| b3631       | <i>rfaG</i> lipopolysaccharide glucosyltransferase I                                          | [9]               |
| b2215       | <i>ompC</i> outer membrane porin C                                                            |                   |
| b3780       | <i>rhIB</i> degradosome                                                                       |                   |
| b3956       | <i>ppc</i> phosphoenolpyruvate carboxylase                                                    |                   |
| b3493       | <i>pitA</i> PitA                                                                              |                   |
| b2415       | <i>ptsH</i> HPr                                                                               |                   |
| b3806       | <i>cyaA</i> adenylate cyclase                                                                 | [10]              |
| b0015       | <i>dnaJ</i> chaperone with DnaK; heat shock protein                                           | [11]              |
| b1048       | <i>mdoG</i> periplasmic glucan (MDO) biosynthesis protein                                     |                   |
| b1049       | <i>mdoH</i> membrane glycosyltransferase; synthesis of membrane-derived oligosaccharide (MDO) |                   |
| b2218       | <i>rscC</i> RcsC-P his                                                                        | [12]              |
| b1291       | <i>sapD</i> peptide uptake ABC transporter                                                    |                   |
| b3290       | <i>trkA</i> NAD-binding component of Trk potassium transporter                                |                   |
| b1290       | <i>sapF</i> peptide uptake ABC transporter                                                    |                   |
| b3849       | <i>trkH</i> TrkH potassium ion Trk Transporter                                                |                   |
| b0464       | <i>acrR</i> AcrR transcriptional repressor                                                    | [1,13]            |
| b1676       | <i>pykF</i> pyruvate kinase I monomer                                                         |                   |

In finding references, emphasis was placed on global studies and work in *E. coli*. Expression changes in response to drug addition were not sufficient for inclusion. Results and Discussion describes how the class of genes was determined.

## References

1. Tamae C, Liu A, Kim K, Sitz D, Hong J, et al. (2008) Determination of antibiotic hypersensitivity among 4,000 single-gene-knockout mutants of *Escherichia coli*. *J Bacteriol* 190: 5981-5988.
2. Walters RN, Piddock LJ, Wise R (1989) The effect of mutations in the SOS response on the kinetics of quinolone killing. *J Antimicrob Chemother* 24: 863-873.
3. Sengupta S, Rahman MS, Mukherjee U, Basak J, Pal AK, et al. (1990) DNA damage and prophage induction and toxicity of nitrofurantoin in *Escherichia coli* and *Vibrio cholerae* cells. *Mutat Res* 244: 55-60.

4. Kosa JL, Zdraveski ZZ, Currier S, Marinus MG, Essigmann JM (2004) RecN and RecG are required for *Escherichia coli* survival of Bleomycin-induced damage. *Mutat Res* 554: 149-157.
5. Fajardo A, Martinez-Martin N, Mercadillo M, Galan JC, Ghysels B, et al. (2008) The neglected intrinsic resistome of bacterial pathogens. *PLoS ONE* 3: e1619.
6. Gomez MJ, Neyfakh AA (2006) Genes involved in intrinsic antibiotic resistance of *Acinetobacter baylyi*. *Antimicrob Agents Chemother* 50: 3562-3567.
7. Okusu H, Ma D, Nikaido H (1996) AcrAB efflux pump plays a major role in the antibiotic resistance phenotype of *Escherichia coli* multiple-antibiotic-resistance (Mar) mutants. *J Bacteriol* 178: 306-308.
8. Rosenberg EY, Bertenthal D, Nilles ML, Bertrand KP, Nikaido H (2003) Bile salts and fatty acids induce the expression of *Escherichia coli* AcrAB multidrug efflux pump through their interaction with Rob regulatory protein. *Mol Microbiol* 48: 1609-1619.
9. Hancock RE (1984) Alterations in outer membrane permeability. *Annu Rev Microbiol* 38: 237-264.
10. Alper MD, Ames BN (1978) Transport of antibiotics and metabolite analogs by systems under cyclic AMP control: positive selection of *Salmonella typhimurium cya* and *crp* mutants. *J Bacteriol* 133: 149-157.
11. Wolska KI, Bugajska E, Jurkiewicz D, Kuc M, Jozwik A (2000) Antibiotic susceptibility of *Escherichia coli dnaK* and *dnaJ* mutants. *Microb Drug Resist* 6: 119-126.
12. Laubacher ME, Ades SE (2008) The Rcs phosphorelay is a cell envelope stress response activated by peptidoglycan stress and contributes to intrinsic antibiotic resistance. *J Bacteriol* 190: 2065-2074.
13. Ma D, Alberti M, Lynch C, Nikaido H, Hearst JE (1996) The local repressor AcrR plays a modulating role in the regulation of *acrAB* genes of *Escherichia coli* by global stress signals. *Mol Microbiol* 19: 101-112.
