# Supplementary material for: Genetic Architecture of Intrinsic Antibiotic Susceptibility
Source: PubMed Central journal article supplement (PMC2680486; doi:10.1371/journal.pone.0005629), 2009-05-20
Supplement: pone.0005629.s017.pdf [file pone.0005629.s017.pdf]

**Table S5. MIC changes in aminoglycosides.**

| NAME                         | Relative Susceptibility <sup>a</sup> / Change in Enrichment <sup>b</sup> |        |        |        |
|------------------------------|--------------------------------------------------------------------------|--------|--------|--------|
|                              | AMK                                                                      | GEN    | STR    | TOB    |
| <i>acnB::kan</i>             | 1 / ↑                                                                    | -1 / ↑ | 0 / ↑  | 0 / ↑  |
| <i>sbmA::kan</i>             | 1 / ↔                                                                    | 0 / ↔  | 1 / ↑  | -1 / ↔ |
| <i>cyoA::kan</i>             | 2 / ND                                                                   | 1 / ND | 2 / ND | 1 / ↑  |
| <i>ubiF::kan</i>             | 3 / ↑                                                                    | 1 / ↑  | 2 / ↑  | 2 / ↑  |
| <i>puuR::kan</i>             | 1 / ↑                                                                    | 0 / ↑  | 1 / ↔  | 0 / ↔  |
| <i>nuoG::kan</i>             | 0 / ↑                                                                    | 0 / ↑  | 1 / ↑  | 0 / ↑  |
| <i>gpp::kan</i> <sup>c</sup> | 2 / ↔                                                                    | 2 / ↑  | 1 / ↔  | 1 / ↑  |
| <i>cyaA::kan</i>             | 3 / ↑                                                                    | 1 / ↑  | 2 / ↑  | 0 / ↑  |
| <i>cpxA::kan</i>             | 2 / ↑                                                                    | 2 / ↑  | 0 / ↑  | 1 / ↑  |

<sup>a</sup> Relative susceptibility is expressed as  $\log_{1.5}(\text{MIC mutant})/(\text{MIC wild-type})$ , where MIC is the minimal inhibitory concentration for the given antibiotic.

<sup>b</sup> A “↑” (“↓”) indicates that mutants with transposons in or near the locus were significantly enriched (depleted) during growth in the indicated antibiotic; “↔” indicates that no significant change occurred.

<sup>c</sup> MIC was determined after 48 hours. All other measurements were after 24 hours.

ND: no data
