# Supplementary material for: Genetic Architecture of Intrinsic Antibiotic Susceptibility
Source: PubMed Central journal article supplement (PMC2680486; doi:10.1371/journal.pone.0005629), 2009-05-20
Supplement: pone.0005629.s018.pdf [file pone.0005629.s018.pdf]

**Table S6. Additional class-specific MIC changes (non-aminoglycosides).**

| Genotype         | Relative Susceptibility <sup>a</sup> / Change in Enrichment <sup>b</sup> |        |        |        |         |        |        |
|------------------|--------------------------------------------------------------------------|--------|--------|--------|---------|--------|--------|
|                  | DOX                                                                      | TET    | LOM    | NAL    | BLM     | SLF    | TRM    |
| <i>lon::kan</i>  | 1 / ↑                                                                    | 1 / ↑  | ND / ↔ | ND / ↔ | ND / ↔  | ND / ↔ | ND / ↔ |
| <i>ppk::kan</i>  | 1 / ↑                                                                    | 1 / ↑  | -1 / ↔ | 1 / ↑  | ND / ↔  | ND / ↔ | ND / ↔ |
| <i>rseB::kan</i> | -1 / ↓                                                                   | 0 / ↔  | ND / ↔ | ND / ↔ | ND / ↔  | ND / ↔ | ND / ↔ |
| <i>qseB::kan</i> | <-2 / ↓                                                                  | 0 / ↔  | -1 / ↔ | -2 / ↓ | ND / ↔  | ND / ↔ | ND / ↔ |
| <i>ompR::kan</i> | 0 / ↔                                                                    | 1 / ↑  | ND / ↔ | ND / ↔ | ND / ↔  | ND / ↔ | ND / ↔ |
| <i>sbmA::kan</i> | ND / ↔                                                                   | ND / ↔ | ND / ↔ | ND / ↔ | 2 / ↑   | ND / ↔ | ND / ↔ |
| <i>prlC::kan</i> | ND / ↔                                                                   | ND / ↔ | ND / ↔ | ND / ↔ | -1 / ND | ND / ↔ | ND / ↔ |
| <i>folM::kan</i> | ND / ↔                                                                   | ND / ↔ | ND / ↔ | ND / ↔ | ND / ↔  | 4 / ↑  | 0 / ↑  |
| <i>folX::kan</i> | ND / ↔                                                                   | ND / ↔ | ND / ↔ | ND / ↔ | ND / ↔  | 2 / ↔  | 0 / ↑  |
| <i>yafD::kan</i> | ND / ↔                                                                   | ND / ↔ | ND / ↔ | ND / ↔ | ND / ↔  | ND / ↔ | 1 / ↑  |

<sup>a</sup> Relative susceptibility is expressed as  $\log_{1.5}(\text{MIC mutant})/(\text{MIC wild-type})$ , where MIC is the minimal inhibitory concentration for the given antibiotic.

<sup>b</sup> A “↑” (“↓”) indicates that mutants with transposons in or near the locus were significantly enriched (depleted) during growth in the indicated antibiotic; “↔” indicates that no significant change occurred. ND: no data
