# Supplementary material for: Genetic Architecture of Intrinsic Antibiotic Susceptibility
Source: PLoS One. 2009 May 20;4(5):e5629. doi: 10.1371/journal.pone.0005629 (PMC2680486; doi:10.1371/journal.pone.0005629)
Supplement: Table S4 — Additional genes identified in both this study and previous work. (0.07 MB PDF) [file pone.0005629.s016.pdf]

**Table S4. Additional genes identified in both this study and previous work.**

| bnum  | Annotation                                                  | Effect | Notes                            | Drug     | Reference |
|-------|-------------------------------------------------------------|--------|----------------------------------|----------|-----------|
| b4058 | <i>uvrA</i> excision nuclease subunit A                     | down   |                                  | NIT      | [1]       |
| b3822 | <i>recQ</i> ATP-dependent DNA helicase                      | down   |                                  | NIT      | [1]       |
| b0851 | <i>nfsA</i> NADPH nitroreductase                            | up     |                                  | NIT      | [2]       |
| b0850 | <i>ybjC</i> predicted inner membrane protein                | up     | Effect is likely polar on b0851. | NIT      | [2]       |
| b1861 | <i>ruvA</i> branch migration of Holliday structures; repair | down   |                                  | NAL, LOM | [3]       |
| b0929 | <i>ompF</i> The Colicin A Import System                     | up     |                                  | TET      | [4]       |
| b0888 | <i>trxB</i> thioredoxin reductase monomer                   | up     |                                  | DOX, TET | [5]       |

“Down” indicates that strains with the locus disrupted were depleted during enrichments in the indicated drug(s). “Up” indicates that strains with the locus disrupted increased in abundance during the enrichments. In finding references, emphasis was placed on global studies and work in *E. coli*. Expression changes in response to drug addition were not sufficient for inclusion.

## References

1. Sengupta S, Rahman MS, Mukherjee U, Basak J, Pal AK, et al. (1990) DNA damage and prophage induction and toxicity of nitrofurantoin in *Escherichia coli* and *Vibrio cholerae* cells. *Mutat Res* 244: 55-60.
2. Whiteway J, Koziarz P, Veall J, Sandhu N, Kumar P, et al. (1998) Oxygen-insensitive nitroreductases: analysis of the roles of *nfsA* and *nfsB* in development of resistance to 5-nitrofur derivatives in *Escherichia coli*. *J Bacteriol* 180: 5529-5539.
3. Walters RN, Piddock LJ, Wise R (1989) The effect of mutations in the SOS response on the kinetics of quinolone killing. *J Antimicrob Chemother* 24: 863-873.
4. Thanassi DG, Suh GS, Nikaido H (1995) Role of outer membrane barrier in efflux-mediated tetracycline resistance of *Escherichia coli*. *J Bacteriol* 177: 998-1007.
5. Fajardo A, Martinez-Martin N, Mercadillo M, Galan JC, Ghysels B, et al. (2008) The neglected intrinsic resistome of bacterial pathogens. *PLoS ONE* 3: e1619.
