# Supplementary material for: Genetic Architecture of Intrinsic Antibiotic Susceptibility
Source: PLoS One. 2009 May 20;4(5):e5629. doi: 10.1371/journal.pone.0005629 (PMC2680486; doi:10.1371/journal.pone.0005629)
Supplement: Table S7 — MIC changes for mutants with altered susceptibility to multiple drug classes. (0.07 MB PDF) [file pone.0005629.s019.pdf]

**Table S7. MIC changes for mutants with altered susceptibility to multiple drug classes.**

| Genotype         | Relative Susceptibility <sup>a</sup> / Change in Enrichment <sup>b</sup> |        |        |         |        |        |        |        |        |
|------------------|--------------------------------------------------------------------------|--------|--------|---------|--------|--------|--------|--------|--------|
|                  | AMK                                                                      | AMP    | BLM    | DOX     | FUS    | LOM    | NAL    | TET    | TRM    |
| <i>phoP::kan</i> | ND                                                                       | -1 / ↓ | ND / ↔ | -5 / ↓  | ND / ↔ | -1 / ↓ | -1 / ↓ | -1 / ↓ | -1 / ↓ |
| <i>sapD::kan</i> | ND                                                                       | ND / ↔ | ND / ↔ | 1 / ↑   | ND / ↔ | -1 / ↔ | 1 / ↑  | 1 / ↑  | ND / ↔ |
| <i>yrbE::kan</i> | ND                                                                       | ND / ↔ | 1 / ↑  | >-5 / ↓ | ND / ↔ | -1 / ↓ | -2 / ↓ | 0 / ↔  | ND / ↔ |
| <i>rfaG::kan</i> | 0 / ↓                                                                    | 1 / ↔  | ND / ↔ | -4 / ↓  | ND / ↔ | -1 / ↓ | -4 / ↓ | 0 / ↔  | -3 / ↓ |
| <i>yfgC::kan</i> | 1 / ↔                                                                    | -1 / ↓ | ND / ↓ | -1 / ↓  | -4 / ↓ | 0 / ↔  | -1 / ↓ | 0 / ↔  | -1 / ↔ |
| <i>wzxE::kan</i> | -2 / ↓                                                                   | 0 / ↔  | ND / ↓ | 0 / ↑   | ND / ↔ | 0 / ↔  | -1 / ↓ | 0 / ↔  | 0 / ↔  |
| <i>ompC::kan</i> | 0 / ↓                                                                    | 0 / ↓  | ND / ↔ | 0 / ↓   | ND / ↔ | 0 / ↓  | -1 / ↓ | 0 / ↔  | 0 / ↔  |

<sup>a</sup> Relative susceptibility is expressed as  $\log_{1.5}(\text{MIC mutant})/(\text{MIC wild-type})$ , where MIC is the minimal inhibitory concentration for the given antibiotic.

<sup>b</sup> A “↑” (“↓”) indicates that mutants with transposons in or near the locus were significantly enriched (depleted) during growth in the indicated antibiotic; “↔” indicates that no significant change occurred. ND: no data
